# Supplementary material for: De Novo Transcription Responses Describe Host-Related Differentiation of Paracoccus marginatus (Hemiptera: Pseudococcidae)
Source: MDPI journal article supplement (doi:10.3390/insects13090850), 2022-09-19
Supplement: s1 [file s1]

## Supplementary Information (Figures S1-S7, Tables S1-S8)

### *De Novo* Transcription Responses Describe Host-Related Differentiation of *Paracoccus marginatus* (Hemiptera: Pseudococcidae)

Li-Zhen Zheng<sup>1</sup>, Jian-Yu Li<sup>1</sup>, Meng-Zhu Shi<sup>2</sup>, Yan-Ting Chen<sup>1</sup>, Xiao-Yun He<sup>2</sup>, Jian-Wei Fu<sup>2\*</sup>

<sup>1</sup> Institute of Plant Protection, Fujian Academy of Agricultural Sciences, Fuzhou, Fujian, China,

<sup>2</sup> Institute of Quality Standards & Testing Technology for Agro-Products/Fujian Provincial Key Laboratory of Quality and Safety of Agricultural Products, Fujian Academy of Agricultural Sciences, Fuzhou, Fujian, China

\*Corresponding author: fjw9238@163.com

#### Supplementary Information:

**Figure S1.** Modified plastic box and experimental breeding

**Figure S2.** Distribution of the length of all unigenes in *Pa. marginatus*.

**Figure S3.** GO enrichment analysis of the DEGs.

**Figure S4.** Scatterplot of enriched KEGG analysis of the up and down-regulated DEGs. (a) The down-regulated DEGs. (b) The up-regulated DEGs.

**Figure S5.** DEGs parted in the longevity regulation pathway-worm pathway of *Pa. marginatus*.

**Figure S6.** Correlation analysis between RT-qPCR and De novo data of 10 selected genes expression levels, respectively. Each color point represents a value of fold change of expression level at TF6 comparing with MF6.

**Figure S7.** DEGs parted in the Drug metabolism - cytochrome P450 pathway of *Pa. marginatus*.

**Table S1.** Primers used in qRT-PCR gene expression verification experiment.

**Table S2.** KOG\_classification.

**Table S3.** Up and down regulated genes.

**Table S4.** KEGG\_classification.

**Table S5.** UP-Pathway and DOWN-Pathway of DEGs.

**Table S6.** GO enrichment results of DEGs.

**Table S7.** KEGG pathway enrichment results of DEGs.

**Table S8.** DEGs related to digestive enzyme, detoxifying enzyme, reproduction and ribosome in *Pa. marginatus* transcriptome.

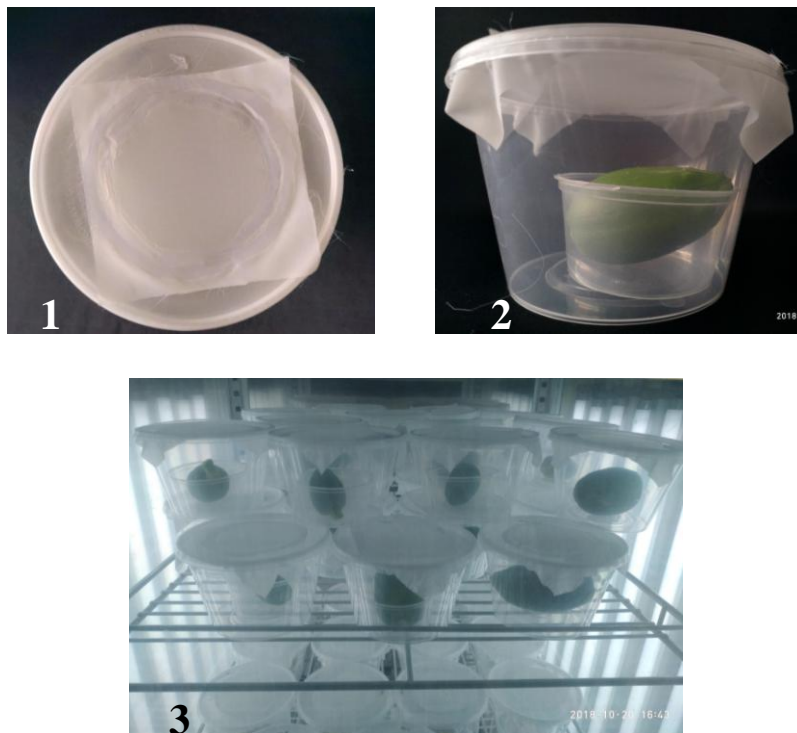

**Figure S1.** Modified plastic box and experimental breeding. 1 Reconstructed transparent plastic round box (top view);

- 2. Reconstructed transparent plastic round box (front view);
- 3. Cultivation of *Paracoccus marginatus* in artificial climate chamber.

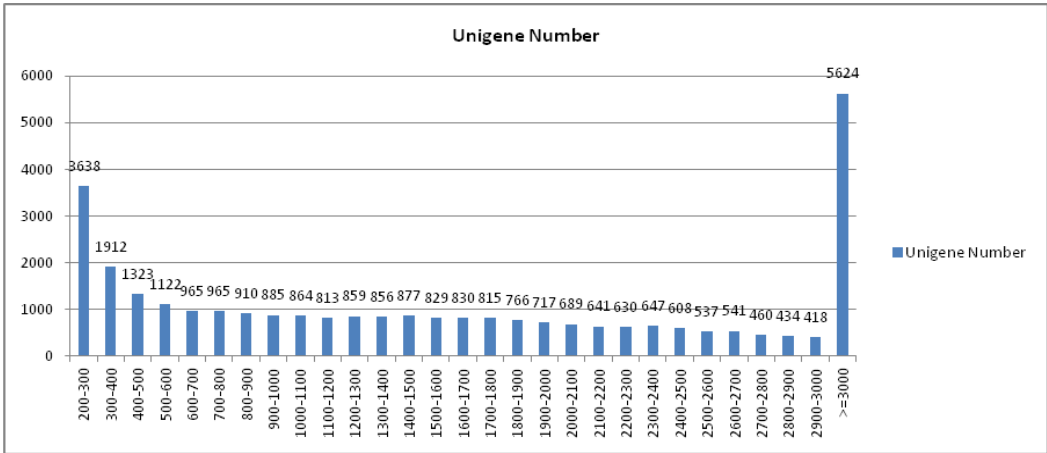

Figure S2. Distribution of the length of all unigenes in *Pa. marginatus*.

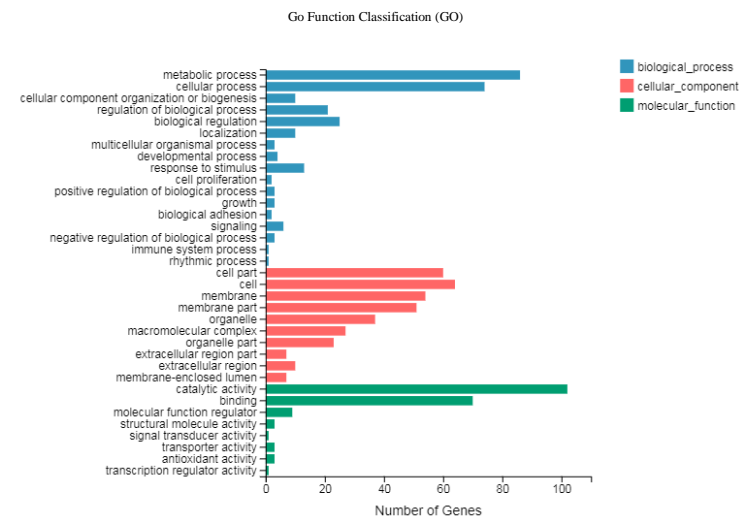

Figure S3. GO enrichment analysis of the DEGs.

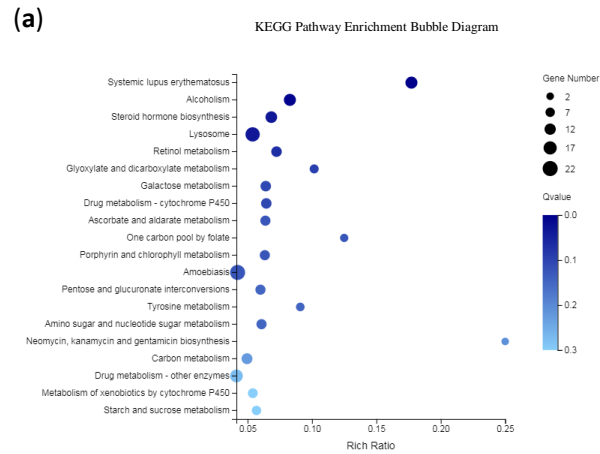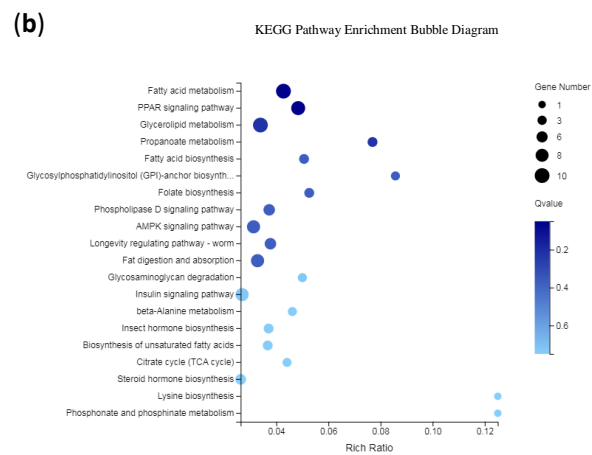

**Figure S4.** Scatterplot of enriched KEGG analysis of the up and down-regulated DEGs. (a)

The down-regulated DEGs. (b) The up-regulated DEGs.

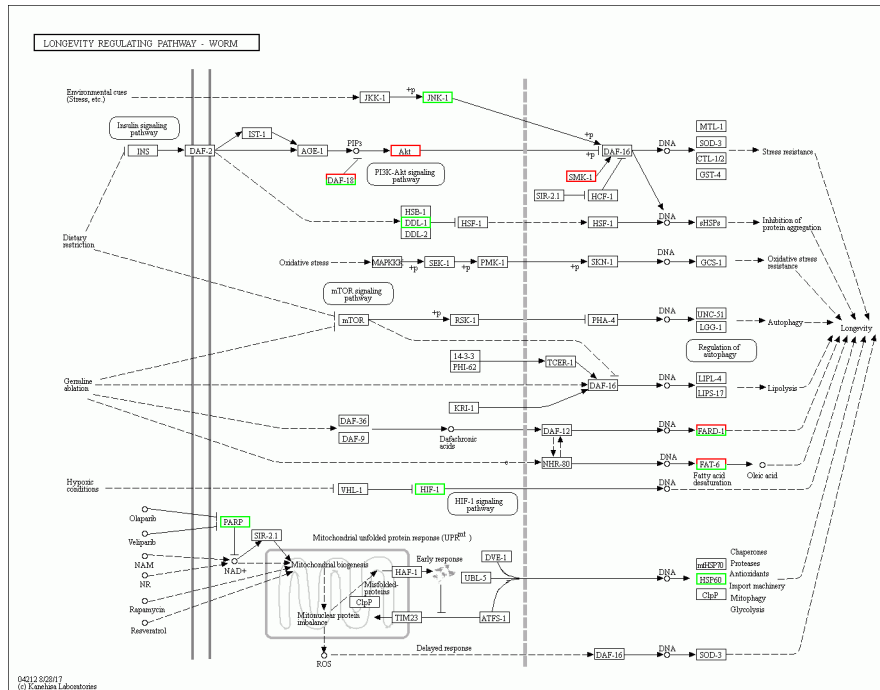

**Figure S5.** DEGs parted in the longevity regulation pathway-worm pathway of *Pa. marginatus*.

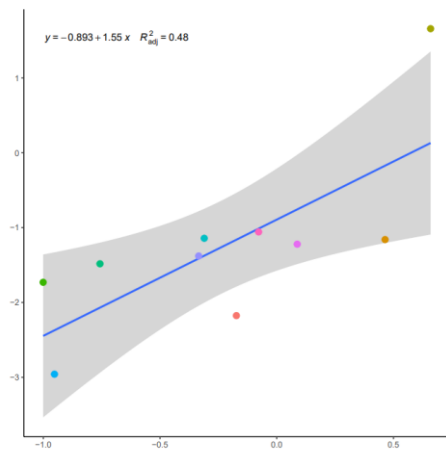

**Figure S6.** Correlation analysis between RT-qPCR and De novo data of 10 selected genes expression levels, respectively. Each color point represents a value of fold change of expression level at TF6 comparing with MF6.
