# Supplementary material for: De Novo Transcription Responses Describe Host-Related Differentiation of Paracoccus marginatus (Hemiptera: Pseudococcidae)
Source: Insects. 2022 Sep 19;13(9):850. doi: 10.3390/insects13090850 (PMC9502998; doi:10.3390/insects13090850)
Supplement: Supplementary file 1 [file insects-13-00850-s001.zip]

Archive with 9 entries (9 files):
- Supplementary Information (Figures S1-S7, Tables S1-S8).pdf
- Table S1. Primers used in qRT-PCR gene expression verification experiment.xlsx
- Table S2. KOG_classification.xlsx
- Table S3 up and down regulated genes.xlsx
- Table S4. KEGG_classification.xlsx
- Table S5. UP-Pathway and DOWN-Pathway of DEGs.xlsx
- Table S6. GO enrichment results of DEGs.xlsx
- Table S7. KEGG pathway enrichment results of DEGs..xlsx
- Table S8. DEGs related to  enzymes in Pa. marginatus transcriptome.xlsx
