# Supplementary material for: De Novo Transcription Responses Describe Host-Related Differentiation of Paracoccus marginatus (Hemiptera: Pseudococcidae)
Source: Insects. 2022 Sep 19;13(9):850. doi: 10.3390/insects13090850 (PMC9502998; doi:10.3390/insects13090850)
Supplement: Supplementary file 1 [file insects-13-00850-s001.zip › Table S1. Primers used in qRT-PCR gene expression verification experiment.xlsx]

## Sheet: Sheet1
Gene name	Gene ID	Primer-F	Primer-R	length
tubulin	CL803.Contig6_All	5' CTTCACTTCTTCATGCCTGG 3'	5' TTTGTTCGTCAACTTCTTTC 3'	202
AP-1	CL1124.Contig3_All	5' ATGAACGAAACCAACACGAG 3'	5'CCAACGAATCCAAAATGAAC 3'	124
LAMAN	CL286.Contig13_All	5' CTTGGTTCGGCAAAGGAGCA 3'	5' GATTGGATGTGGGGAGGGTA 3	162
Aminopeptidase	CL637.Contig13_All	5' TTCGATGCTTTTGACCAACA 3'	5' TTTATCACCGGGTATCCTGC 3'	116
LGMN-GPI	CL2961.Contig1_All	5' TTTTGGTGATTTACTGGTGC 3'	5' TAGTCGGAGTGATTTTTCGT 3	154
cathepsins	CL3981.Contig2_All	5' CTACAGAAACAGCCCAACAC 3'	5' TCCGAACCAAGTAAAAACAA 3	170
LGMN	Unigene11195_All	5' GCTACCATATCCTCCACCAC 3'	5' TTTTCTCTTCAGCATTCAAC 3'	142
UGT	CL256.Contig2_All	5' AATACAAAGAAAACGCCAAG 3'	5' TCTAATAATGAATCGAAGGG 3'	254
DAF-18	CL525.Contig3_All	5' TTATTCTGTTTATCCTTATG 3'	5' TGACGACTCTGCTACTTGTA 3	144
POD	CL285.Contig1_All	5' TGTGCGTTACTCGGTACACA 3	5' GGCGATCAACTTGACATTTC 3	268
ribosomal protein	CL55.Contig2_All	5' ATTCGCCGCTTCGATATGTC 3'	5' GTCCACTGGTCGGTGGTTTG 3'	280
