# Supplementary material for: De Novo Transcription Responses Describe Host-Related Differentiation of Paracoccus marginatus (Hemiptera: Pseudococcidae)
Source: Insects. 2022 Sep 19;13(9):850. doi: 10.3390/insects13090850 (PMC9502998; doi:10.3390/insects13090850)
Supplement: Supplementary file 1 [file insects-13-00850-s001.zip › Table S2. KOG_classification.xlsx]

## Sheet: 4.1.8_KOG_KOG 功能分类表_105409
KOG Classification	num
Amino acid transport and metabolism	598
Carbohydrate transport and metabolism	765
Cell cycle control, cell division, chromosome partitioning	238
Cell motility	25
Cell wall/membrane/envelope biogenesis	198
Chromatin structure and dynamics	234
Coenzyme transport and metabolism	121
Cytoskeleton	781
Defense mechanisms	196
Energy production and conversion	482
Extracellular structures	203
Function unknown	1171
General function prediction only	3495
Inorganic ion transport and metabolism	378
Intracellular trafficking, secretion, and vesicular transport	717
Lipid transport and metabolism	820
Nuclear structure	172
Nucleotide transport and metabolism	174
Posttranslational modification, protein turnover, chaperones	1334
RNA processing and modification	834
Replication, recombination and repair	352
Secondary metabolites biosynthesis, transport and catabolism	364
Signal transduction mechanisms	2072
Transcription	1115
Translation, ribosomal structure and biogenesis	669
