# Supplementary material for: De Novo Transcription Responses Describe Host-Related Differentiation of Paracoccus marginatus (Hemiptera: Pseudococcidae)
Source: Insects. 2022 Sep 19;13(9):850. doi: 10.3390/insects13090850 (PMC9502998; doi:10.3390/insects13090850)
Supplement: Supplementary file 1 [file insects-13-00850-s001.zip › Table S3 up and down regulated genes.xlsx]

## Sheet: UP
Gene ID	MF6 FPKM	TF6 FPKM	log2(TF6/MF6)	Qvalue(MF6-vs-TF6)	Pvalue(MF6-vs-TF6)	TFs	Kegg Orthology	Nt	Nr	Pfam	Kog	Swissprot	GO
CL100.Contig4_All	0	0.726	5.96624	6.90022e-09	7.25199e-09
CL1003.Contig1_All	0.233	2.53	3.44099	1.27613e-136	1.73665e-137		K16482//centriolar protein POC1;K16482//centriolar protein POC1;K16482//centriolar protein POC1;K16482//centriolar protein POC1;K16482//centriolar protein POC1		PREDICTED: WD repeat-containing protein 47 isoform X1 [Microplitis demolitor]	WD domain, G-beta repeat	[R] KOG0641 WD40 repeat protein	WD repeat-containing protein 47 OS=Mus musculus GN=Wdr47 PE=1 SV=2
CL1004.Contig5_All	0.046	2.256	5.55083	6.86061e-70	1.73231e-70		K06491//neural cell adhesion molecule+ko04514//Cell adhesion molecules (CAMs)+ko05020//Prion diseases;K12567//titin [EC:2.7.11.1]+ko05414//Dilated cardiomyopathy (DCM)+ko05410//Hypertrophic cardiomyopathy (HCM);K06491//neural cell adhesion molecule+ko04514//Cell adhesion molecules (CAMs)+ko05020//Prion diseases;K12567//titin [EC:2.7.11.1]+ko05414//Dilated cardiomyopathy (DCM)+ko05410//Hypertrophi…		CLUMA_CG007674, isoform A [Clunio marinus]	Fibronectin type III domain
CL1004.Contig7_All	5.786	15.12	1.37896	1.06331e-210	9.2231e-212		K06768//Down syndrome cell adhesion molecule-like protein 1;K12567//titin [EC:2.7.11.1]+ko05414//Dilated cardiomyopathy (DCM)+ko05410//Hypertrophic cardiomyopathy (HCM);K12567//titin [EC:2.7.11.1]+ko05414//Dilated cardiomyopathy (DCM)+ko05410//Hypertrophic cardiomyopathy (HCM);K12567//titin [EC:2.7.11.1]+ko05414//Dilated cardiomyopathy (DCM)+ko05410//Hypertrophic cardiomyopathy (HCM);K12567//titi…	AC240970.1 Homo sapiens FOSMID clone COR2A-DD0002TS3NU_O17 from chromosome 13, complete sequence	PREDICTED: neural cell adhesion molecule 2 [Falco peregrinus]	Immunoglobulin domain	[Z] KOG0613 Projectin/twitchin and related proteins	Neural cell adhesion molecule 2 OS=Mus musculus GN=Ncam2 PE=1 SV=1
CL1007.Contig3_All	0	0.306	6.03207	3.19819e-09	3.3004e-09				PREDICTED: uncharacterized protein LOC108369232, partial [Rhagoletis zephyria]
CL1012.Contig1_All	0.213	0.813	1.94364	7.11681e-05	0.000101005		K19933//calcium-dependent secretion activator;K19933//calcium-dependent secretion activator;K19933//calcium-dependent secretion activator;K19933//calcium-dependent secretion activator		PREDICTED: calcium-dependent secretion activator [Microplitis demolitor]
CL1015.Contig2_All	0	0.193	6.02757	3.37287e-09	3.48653e-09		K01187//alpha-glucosidase [EC:3.2.1.20]+ko00052//Galactose metabolism+ko00500//Starch and sucrose metabolism+ko01100//Metabolic pathways;K12317//neutral alpha-glucosidase C [EC:3.2.1.20]+ko00052//Galactose metabolism+ko00500//Starch and sucrose metabolism+ko01100//Metabolic pathways;K12317//neutral alpha-glucosidase C [EC:3.2.1.20]+ko00052//Galactose metabolism+ko00500//Starch and sucrose metabol…		alpha-glucosidase family 31, partial [Periplaneta americana]	Glycosyl hydrolases family 31	[G] KOG1065 Maltase glucoamylase and related hydrolases, glycosyl hydrolase family 31	Uncharacterized family 31 glucosidase KIAA1161 OS=Mus musculus GN=Kiaa1161 PE=1 SV=2
CL1022.Contig3_All	0.443	1.04	1.23941	1.63252e-27	8.57961e-28		K12879//THO complex subunit 2+ko03040//Spliceosome+ko03013//RNA transport;K12879//THO complex subunit 2+ko03040//Spliceosome+ko03013//RNA transport;K12879//THO complex subunit 2+ko03040//Spliceosome+ko03013//RNA transport;K12879//THO complex subunit 2+ko03040//Spliceosome+ko03013//RNA transport;K12879//THO complex subunit 2+ko03040//Spliceosome+ko03013//RNA transport	XR_975160.1 PREDICTED: Wasmannia auropunctata THO complex subunit 2 (LOC105455781), transcript variant X4, misc_RNA	THO complex subunit 2 [Zootermopsis nevadensis]	Transcription factor/nuclear export subunit protein 2	[K] KOG1015 Transcription regulator XNP/ATRX, DEAD-box superfamily	THO complex subunit 2 OS=Plecturocebus moloch GN=THOC2 PE=3 SV=1
CL1030.Contig2_All	0.403	1.02	1.31734	8.90625e-29	4.54025e-29	TF_bZIP	K20478//golgin subfamily B member 1;K20282//GRIP and coiled-coil domain-containing protein 2;K20283//golgin subfamily A member 4;K20478//golgin subfamily B member 1;K20478//golgin subfamily B member 1		PREDICTED: putative leucine-rich repeat-containing protein DDB_G0290503 isoform X3 [Halyomorpha halys]	Protein of unknown function (DUF3450)	[Z] KOG0161 Myosin class II heavy chain	Myosin-2 heavy chain OS=Dictyostelium discoideum GN=mhcA PE=1 SV=3
CL1030.Contig3_All	0.833	3.253	1.94689	1.8873e-158	2.20322e-159	TF_bZIP	K20478//golgin subfamily B member 1;K20478//golgin subfamily B member 1;K20282//GRIP and coiled-coil domain-containing protein 2;K20283//golgin subfamily A member 4;K20478//golgin subfamily B member 1		PREDICTED: putative leucine-rich repeat-containing protein DDB_G0290503 isoform X8 [Halyomorpha halys]	Protein of unknown function (DUF3450)	[Z] KOG0161 Myosin class II heavy chain	Myosin-2 heavy chain OS=Dictyostelium discoideum GN=mhcA PE=1 SV=3
CL1033.Contig3_All	0	1.81	6.77272	5.24097e-14	4.28849e-14
CL1035.Contig1_All	1.526	7.7	2.33569	0	0		K17906//autophagy-related protein 2+ko04140//Autophagy - animal+ko04136//Autophagy - other;K17906//autophagy-related protein 2+ko04140//Autophagy - animal+ko04136//Autophagy - other;K17906//autophagy-related protein 2+ko04140//Autophagy - animal+ko04136//Autophagy - other;K17906//autophagy-related protein 2+ko04140//Autophagy - animal+ko04136//Autophagy - other;K17906//autophagy-related protein 2…	XM_007948292.1 PREDICTED: Orycteropus afer afer TBC1 domain containing kinase (TBCK), transcript variant X3, mRNA	PREDICTED: autophagy-related protein 2 homolog B [Diachasma alloeum]	Autophagy-related protein C terminal domain	[U] KOG2993 Cytoplasm to vacuole targeting protein	Autophagy-related protein 2 homolog B OS=Homo sapiens GN=ATG2B PE=1 SV=5
CL1035.Contig5_All	0.026	0.16	2.50913	1.49033e-13	1.24297e-13		K17906//autophagy-related protein 2+ko04140//Autophagy - animal+ko04136//Autophagy - other;K17906//autophagy-related protein 2+ko04140//Autophagy - animal+ko04136//Autophagy - other;K17906//autophagy-related protein 2+ko04140//Autophagy - animal+ko04136//Autophagy - other;K17906//autophagy-related protein 2+ko04140//Autophagy - animal+ko04136//Autophagy - other;K17906//autophagy-related protein 2…	XM_007948292.1 PREDICTED: Orycteropus afer afer TBC1 domain containing kinase (TBCK), transcript variant X3, mRNA	PREDICTED: autophagy-related protein 2 homolog B [Neodiprion lecontei]	YqaJ-like viral recombinase domain	[U] KOG2993 Cytoplasm to vacuole targeting protein	TBC domain-containing protein kinase-like protein OS=Gallus gallus GN=TBCK PE=2 SV=2
CL1044.Contig3_All	0	0.75	8.61749	1.49326e-39	6.01524e-40		K00600//glycine hydroxymethyltransferase [EC:2.1.2.1]+ko00670//One carbon pool by folate+ko01200//Carbon metabolism+ko01523//Antifolate resistance+ko01230//Biosynthesis of amino acids+ko00260//Glycine, serine and threonine metabolism+ko01100//Metabolic pathways+ko00630//Glyoxylate and dicarboxylate metabolism;K00600//glycine hydroxymethyltransferase [EC:2.1.2.1]+ko00670//One carbon pool by folate…	XM_020424904.1 PREDICTED: Pseudomyrmex gracilis serine hydroxymethyltransferase, cytosolic-like (LOC109853115), transcript variant X3, mRNA	PREDICTED: serine hydroxymethyltransferase, cytosolic isoform X5 [Orussus abietinus]	Serine hydroxymethyltransferase	[E] KOG2467 Glycine/serine hydroxymethyltransferase	Serine hydroxymethyltransferase, cytosolic OS=Ovis aries GN=SHMT1 PE=1 SV=3
CL1047.Contig3_All	0	1.163	9.28303	4.86512e-57	1.45213e-57		K17284//perilipin-2+ko03320//PPAR signaling pathway;K17284//perilipin-2+ko03320//PPAR signaling pathway;K17284//perilipin-2+ko03320//PPAR signaling pathway;K17284//perilipin-2+ko03320//PPAR signaling pathway;K17284//perilipin-2+ko03320//PPAR signaling pathway		lipid storage droplets surface-binding protein 1-like [Nilaparvata lugens]	Perilipin family	[UI] TWOG0498 Mannose 6-phosphate receptor cofactor involved in formation of transport vesicles/Constituent of milk lipid globule membrane/Perilipins, lipid droplet-associated proteins of adipocytes	Lipid storage droplets surface-binding protein 2 OS=Drosophila melanogaster GN=Lsd-2 PE=1 SV=1
CL1047.Contig9_All	0	1.42	9.40602	5.42104e-61	1.52437e-61		K17284//perilipin-2+ko03320//PPAR signaling pathway;K17284//perilipin-2+ko03320//PPAR signaling pathway;K17284//perilipin-2+ko03320//PPAR signaling pathway;K17284//perilipin-2+ko03320//PPAR signaling pathway;K17284//perilipin-2+ko03320//PPAR signaling pathway		lipid storage droplets surface-binding protein 1 [Myzus persicae]	Perilipin family	[UI] TWOG0498 Mannose 6-phosphate receptor cofactor involved in formation of transport vesicles/Constituent of milk lipid globule membrane/Perilipins, lipid droplet-associated proteins of adipocytes	Lipid storage droplets surface-binding protein 2 OS=Drosophila melanogaster GN=Lsd-2 PE=1 SV=1
CL1051.Contig2_All	1.283	2.71	1.0553	2.69101e-77	6.25076e-78	Others	K16308//citron Rho-interacting kinase [EC:2.7.11.1];K16308//citron Rho-interacting kinase [EC:2.7.11.1];K16308//citron Rho-interacting kinase [EC:2.7.11.1];K16308//citron Rho-interacting kinase [EC:2.7.11.1]		Citron Rho-interacting kinase [Mizuhopecten yessoensis]	Protein kinase domain	[T] KOG0612 Rho-associated, coiled-coil containing protein kinase	Rho-associated protein kinase 2 OS=Bos taurus GN=ROCK2 PE=1 SV=1	GO:0046872//metal ion binding;GO:0004674//protein serine/threonine kinase activity;GO:0005524//ATP binding;GO:0005622//intracellular;GO:0035556//intracellular signal transduction
CL1057.Contig19_All	0.556	1.723	1.66189	2.77505e-32	1.30488e-32		K17908//autophagy-related protein 18+ko04140//Autophagy - animal+ko04136//Autophagy - other;K17908//autophagy-related protein 18+ko04140//Autophagy - animal+ko04136//Autophagy - other;K17908//autophagy-related protein 18+ko04140//Autophagy - animal+ko04136//Autophagy - other;K17908//autophagy-related protein 18+ko04140//Autophagy - animal+ko04136//Autophagy - other;K17908//autophagy-related prote…	XM_022069522.1 PREDICTED: Zootermopsis nevadensis WD repeat domain phosphoinositide-interacting protein 2 (LOC110832477), transcript variant X6, mRNA	PREDICTED: WD repeat domain phosphoinositide-interacting protein 2 isoform X3 [Diachasma alloeum]	Anaphase-promoting complex subunit 4 WD40 domain	[S] KOG2110 Uncharacterized conserved protein, contains WD40 repeats	WD repeat domain phosphoinositide-interacting protein 2 OS=Homo sapiens GN=WIPI2 PE=1 SV=1
CL1057.Contig27_All	1.84	3.756	1.02766	8.03944e-96	1.51526e-96	ZBTB	K10395//kinesin family member 4/21/27;K10395//kinesin family member 4/21/27;K10395//kinesin family member 4/21/27;K10395//kinesin family member 4/21/27	XM_022069522.1 PREDICTED: Zootermopsis nevadensis WD repeat domain phosphoinositide-interacting protein 2 (LOC110832477), transcript variant X6, mRNA	PREDICTED: kinesin-like protein KIF21A isoform X4 [Bemisia tabaci]	Kinesin motor domain	[S] KOG2110 Uncharacterized conserved protein, contains WD40 repeats	Kinesin-like protein KIF21B OS=Mus musculus GN=Kif21b PE=1 SV=2	GO:0007018//microtubule-based movement;GO:0005524//ATP binding;GO:0003777//microtubule motor activity;GO:0008017//microtubule binding
CL1057.Contig5_All	0	1.35	10.8179	9.65357e-130	1.36409e-130	ZBTB	K10395//kinesin family member 4/21/27;K10395//kinesin family member 4/21/27;K10395//kinesin family member 4/21/27;K10395//kinesin family member 4/21/27	XM_022069522.1 PREDICTED: Zootermopsis nevadensis WD repeat domain phosphoinositide-interacting protein 2 (LOC110832477), transcript variant X6, mRNA	PREDICTED: kinesin-like protein KIF21A isoform X4 [Bemisia tabaci]	Kinesin motor domain	[S] KOG2110 Uncharacterized conserved protein, contains WD40 repeats	Kinesin-like protein KIF21B OS=Mus musculus GN=Kif21b PE=1 SV=2	GO:0007018//microtubule-based movement;GO:0005524//ATP binding;GO:0003777//microtubule motor activity;GO:0008017//microtubule binding
CL1057.Contig6_All	0	0.43	9.16164	2.22227e-53	7.04848e-54	ZBTB	K10395//kinesin family member 4/21/27;K10395//kinesin family member 4/21/27;K10395//kinesin family member 4/21/27;K10395//kinesin family member 4/21/27	XM_022069522.1 PREDICTED: Zootermopsis nevadensis WD repeat domain phosphoinositide-interacting protein 2 (LOC110832477), transcript variant X6, mRNA	PREDICTED: kinesin-like protein KIF21A isoform X4 [Bemisia tabaci]	Kinesin motor domain	[S] KOG2110 Uncharacterized conserved protein, contains WD40 repeats	Kinesin-like protein KIF21B OS=Mus musculus GN=Kif21b PE=1 SV=2	GO:0007018//microtubule-based movement;GO:0005524//ATP binding;GO:0003777//microtubule motor activity;GO:0008017//microtubule binding
CL1057.Contig7_All	0	0.036	5.60468	2.84232e-07	3.31903e-07	ZBTB	K10395//kinesin family member 4/21/27;K10395//kinesin family member 4/21/27;K10395//kinesin family member 4/21/27;K10395//kinesin family member 4/21/27	XM_022069522.1 PREDICTED: Zootermopsis nevadensis WD repeat domain phosphoinositide-interacting protein 2 (LOC110832477), transcript variant X6, mRNA	PREDICTED: kinesin-like protein KIF21A isoform X4 [Bemisia tabaci]	Kinesin motor domain	[S] KOG2110 Uncharacterized conserved protein, contains WD40 repeats	Kinesin-like protein KIF21B OS=Mus musculus GN=Kif21b PE=1 SV=2	GO:0007018//microtubule-based movement;GO:0005524//ATP binding;GO:0003777//microtubule motor activity;GO:0008017//microtubule binding
CL106.Contig13_All	0.053	4.753	6.51259	9.57019e-303	5.73172e-304		K10370//tropomodulin;K10370//tropomodulin;K10370//tropomodulin;K10370//tropomodulin;K10370//tropomodulin	XM_014399772.1 PREDICTED: Cimex lectularius tropomodulin (LOC106669910), transcript variant X11, mRNA	PREDICTED: tropomodulin isoform X3 [Diuraphis noxia]	Tropomodulin	[Z] KOG3735 Tropomodulin and leiomodulin	Tropomodulin OS=Caenorhabditis elegans GN=unc-94 PE=1 SV=2
CL106.Contig15_All	0	8.333	12.3281	1.38734e-282	9.16853e-284		K10370//tropomodulin;K10370//tropomodulin;K10370//tropomodulin;K10370//tropomodulin;K10370//tropomodulin	XM_014399772.1 PREDICTED: Cimex lectularius tropomodulin (LOC106669910), transcript variant X11, mRNA	PREDICTED: tropomodulin isoform X3 [Diuraphis noxia]	Tropomodulin	[Z] KOG3735 Tropomodulin and leiomodulin	Tropomodulin-1 OS=Homo sapiens GN=TMOD1 PE=1 SV=1
CL106.Contig18_All	0.093	0.233	1.29397	5.00598e-05	6.99641e-05		K10370//tropomodulin;K10370//tropomodulin;K10370//tropomodulin;K10370//tropomodulin;K10370//tropomodulin	XM_014399772.1 PREDICTED: Cimex lectularius tropomodulin (LOC106669910), transcript variant X11, mRNA	PREDICTED: tropomodulin isoform X1 [Diuraphis noxia]	Tropomodulin	[Z] KOG3735 Tropomodulin and leiomodulin	Tropomodulin OS=Caenorhabditis elegans GN=unc-94 PE=1 SV=2
CL106.Contig1_All	0.11	0.313	1.50803	2.0738e-05	2.80121e-05					SOCS box
CL106.Contig5_All	0.616	6.8	3.47454	3.06063e-280	2.05594e-281		K10370//tropomodulin;K10370//tropomodulin;K10370//tropomodulin;K10370//tropomodulin;K10370//tropomodulin	XM_014399772.1 PREDICTED: Cimex lectularius tropomodulin (LOC106669910), transcript variant X11, mRNA	PREDICTED: tropomodulin isoform X1 [Diuraphis noxia]	Tropomodulin	[Z] KOG3735 Tropomodulin and leiomodulin	Tropomodulin OS=Caenorhabditis elegans GN=unc-94 PE=1 SV=2
CL106.Contig6_All	0.16	0.813	2.36882	5.29832e-31	2.5645e-31		K10370//tropomodulin;K10370//tropomodulin;K10370//tropomodulin;K10370//tropomodulin;K10370//tropomodulin	XM_014399772.1 PREDICTED: Cimex lectularius tropomodulin (LOC106669910), transcript variant X11, mRNA	PREDICTED: tropomodulin isoform X1 [Diuraphis noxia]	Tropomodulin	[Z] KOG3735 Tropomodulin and leiomodulin	Tropomodulin OS=Caenorhabditis elegans GN=unc-94 PE=1 SV=2
CL106.Contig7_All	0.023	2.193	6.51983	8.49113e-91	1.69085e-91		K10370//tropomodulin;K10370//tropomodulin;K10370//tropomodulin;K10370//tropomodulin;K10370//tropomodulin	XM_014399772.1 PREDICTED: Cimex lectularius tropomodulin (LOC106669910), transcript variant X11, mRNA	PREDICTED: tropomodulin isoform X2 [Diuraphis noxia]	Tropomodulin	[Z] KOG3735 Tropomodulin and leiomodulin	Tropomodulin OS=Caenorhabditis elegans GN=unc-94 PE=1 SV=2
CL106.Contig9_All	0	0.053	4.44756	0.000586466	0.000917757		K10370//tropomodulin;K10370//tropomodulin;K10370//tropomodulin;K10370//tropomodulin;K10370//tropomodulin	XM_014399772.1 PREDICTED: Cimex lectularius tropomodulin (LOC106669910), transcript variant X11, mRNA	PREDICTED: tropomodulin isoform X1 [Diuraphis noxia]	Tropomodulin	[Z] KOG3735 Tropomodulin and leiomodulin	Tropomodulin-1 OS=Homo sapiens GN=TMOD1 PE=1 SV=1
CL1067.Contig2_All	0	0.236	7.61749	1.35526e-22	8.12568e-23			JQ897946.1 Acropora millepora 16S ribosomal RNA gene, partial sequence	hypothetical protein CRE_03576 [Caenorhabditis remanei] >EFO92753.1 hypothetical protein CRE_03576 [Caenorhabditis remanei]
CL1067.Contig3_All	0	0.35	6.76598	5.93081e-14	4.86134e-14			LL323027.1 Anisakis simplex genome assembly A_simplex ,scaffold ASIM_contig0000516	hypothetical protein IscW_ISCW024385 [Ixodes scapularis] >EEC08748.1 hypothetical protein IscW_ISCW024385, partial [Ixodes scapularis]
CL1067.Contig9_All	0	0.083	6.75375	7.40399e-14	6.09381e-14		K02867//large subunit ribosomal protein L11+ko03010//Ribosome;K02867//large subunit ribosomal protein L11+ko03010//Ribosome;K02867//large subunit ribosomal protein L11+ko03010//Ribosome;K02867//large subunit ribosomal protein L11+ko03010//Ribosome;K02867//large subunit ribosomal protein L11+ko03010//Ribosome	LM046857.1 Toxocara canis genome assembly T_canis_Equador ,scaffold TCNE_scaffold0008094	hypothetical protein CRE_03576 [Caenorhabditis remanei] >EFO92753.1 hypothetical protein CRE_03576 [Caenorhabditis remanei]	Ribosomal protein L11, N-terminal domain	[J] KOG3257 Mitochondrial/chloroplast ribosomal protein L11	39S ribosomal protein L11, mitochondrial OS=Drosophila melanogaster GN=mRpL11 PE=1 SV=1
CL1069.Contig5_All	6.76	39.56	2.55135	0	0					SSTK-interacting protein, TSSK6-activating co-chaperone protein
CL1071.Contig1_All	0	1.27	6.962	1.35616e-15	1.04189e-15		K00869//mevalonate kinase [EC:2.7.1.36]+ko04146//Peroxisome+ko00900//Terpenoid backbone biosynthesis+ko01100//Metabolic pathways;K00869//mevalonate kinase [EC:2.7.1.36]+ko04146//Peroxisome+ko00900//Terpenoid backbone biosynthesis+ko01100//Metabolic pathways;K00869//mevalonate kinase [EC:2.7.1.36]+ko04146//Peroxisome+ko00900//Terpenoid backbone biosynthesis+ko01100//Metabolic pathways;K00869//meva…		PREDICTED: protein BOLA2-like [Octopus bimaculoides] >KOF77304.1 hypothetical protein OCBIM_22032260mg [Octopus bimaculoides]		[T] KOG3348 BolA (bacterial stress-induced morphogen)-related protein	Mevalonate kinase OS=Dictyostelium discoideum GN=mvk PE=1 SV=1
CL1072.Contig1_All	0.42	18.183	5.41758	0	0		K17362//acyl-coenzyme A thioesterase 13 [EC:3.1.2.-];K17362//acyl-coenzyme A thioesterase 13 [EC:3.1.2.-];K17362//acyl-coenzyme A thioesterase 13 [EC:3.1.2.-];K17362//acyl-coenzyme A thioesterase 13 [EC:3.1.2.-];K17362//acyl-coenzyme A thioesterase 13 [EC:3.1.2.-]		PREDICTED: acyl-coenzyme A thioesterase 13 [Rousettus aegyptiacus]	Thioesterase superfamily	[R] KOG3328 HGG motif-containing thioesterase	Acyl-coenzyme A thioesterase 13 OS=Homo sapiens GN=ACOT13 PE=1 SV=1	GO:0070062//extracellular exosome;GO:0047617//acyl-CoA hydrolase activity;GO:0005634//nucleus;GO:0051289//protein homotetramerization;GO:0005739//mitochondrion;GO:0005737//cytoplasm
CL1072.Contig2_All	0	0.163	5.92322	1.12236e-08	1.19385e-08		K17362//acyl-coenzyme A thioesterase 13 [EC:3.1.2.-];K17362//acyl-coenzyme A thioesterase 13 [EC:3.1.2.-];K17362//acyl-coenzyme A thioesterase 13 [EC:3.1.2.-];K17362//acyl-coenzyme A thioesterase 13 [EC:3.1.2.-];K17362//acyl-coenzyme A thioesterase 13 [EC:3.1.2.-]		PREDICTED: acyl-coenzyme A thioesterase 13 [Rousettus aegyptiacus]	Thioesterase superfamily	[R] KOG3328 HGG motif-containing thioesterase	Acyl-coenzyme A thioesterase 13 OS=Homo sapiens GN=ACOT13 PE=1 SV=1	GO:0070062//extracellular exosome;GO:0047617//acyl-CoA hydrolase activity;GO:0005634//nucleus;GO:0051289//protein homotetramerization;GO:0005739//mitochondrion;GO:0005737//cytoplasm
CL1072.Contig7_All	2.16	17.463	3.01021	0	0		K17362//acyl-coenzyme A thioesterase 13 [EC:3.1.2.-];K17362//acyl-coenzyme A thioesterase 13 [EC:3.1.2.-];K17362//acyl-coenzyme A thioesterase 13 [EC:3.1.2.-];K17362//acyl-coenzyme A thioesterase 13 [EC:3.1.2.-];K17362//acyl-coenzyme A thioesterase 13 [EC:3.1.2.-]		PREDICTED: acyl-coenzyme A thioesterase 13 [Rousettus aegyptiacus]	Thioesterase superfamily	[R] KOG3328 HGG motif-containing thioesterase	Acyl-coenzyme A thioesterase 13 OS=Homo sapiens GN=ACOT13 PE=1 SV=1	GO:0070062//extracellular exosome;GO:0047617//acyl-CoA hydrolase activity;GO:0005634//nucleus;GO:0051289//protein homotetramerization;GO:0005739//mitochondrion;GO:0005737//cytoplasm
CL1076.Contig6_All	1.216	2.533	1.05732	6.37794e-09	6.6913e-09
CL1079.Contig1_All	0.38	0.993	1.38852	6.39808e-05	9.04217e-05
CL1079.Contig2_All	0.41	1.103	1.44635	3.0782e-06	3.8879e-06
CL108.Contig2_All	2.613	5.526	1.07913	1.9737e-48	6.76421e-49		K10638//E3 ubiquitin-protein ligase UHRF1 [EC:2.3.2.27];K10638//E3 ubiquitin-protein ligase UHRF1 [EC:2.3.2.27];K10638//E3 ubiquitin-protein ligase UHRF1 [EC:2.3.2.27];K10638//E3 ubiquitin-protein ligase UHRF1 [EC:2.3.2.27]		Uncharacterized protein APZ42_026932 [Daphnia magna]	VWA N-terminal	[K] TWOG0108 CCAAT binding protein	E3 ubiquitin-protein ligase UHRF1 OS=Xenopus tropicalis GN=uhrf1 PE=3 SV=2
CL1080.Contig1_All	2.493	5.286	1.09506	7.0629e-36	3.07237e-36	Others	K18729//protein angel;K18729//protein angel;K18729//protein angel;K18729//protein angel		PREDICTED: protein angel homolog 2-like isoform X1 [Bemisia tabaci] >XP_018917571.1 PREDICTED: protein angel homolog 2-like isoform X2 [Bemisia tabaci]	Endonuclease/Exonuclease/phosphatase family	[K] KOG2338 Transcriptional effector CCR4-related protein	Protein angel homolog 2 OS=Homo sapiens GN=ANGEL2 PE=2 SV=1
CL1083.Contig4_All	0.436	1.373	1.68122	1.94106e-27	1.02264e-27					HIRAN domain
CL1085.Contig2_All	2.32	9.586	2.05963	1.57701e-67	4.08995e-68		K03926//periplasmic divalent cation tolerance protein;K03926//periplasmic divalent cation tolerance protein;K03926//periplasmic divalent cation tolerance protein		PREDICTED: protein CutA homolog isoform X2 [Tribolium castaneum] >XP_015840724.1 PREDICTED: protein CutA homolog isoform X2 [Tribolium castaneum] >EEZ98414.1 Protein CutA homolog-like Protein [Tribolium castaneum]	CutA1 divalent ion tolerance protein	[P] KOG3338 Divalent cation tolerance-related protein	Protein CutA homolog OS=Xenopus laevis GN=cuta PE=2 SV=2	GO:0010038//response to metal ion
CL1095.Contig4_All	2.943	6.42	1.11502	4.01573e-121	6.07598e-122		K16315//serine/threonine-protein kinase haspin [EC:2.7.11.1];K16315//serine/threonine-protein kinase haspin [EC:2.7.11.1];K16315//serine/threonine-protein kinase haspin [EC:2.7.11.1];K16315//serine/threonine-protein kinase haspin [EC:2.7.11.1];K16315//serine/threonine-protein kinase haspin [EC:2.7.11.1]		PREDICTED: LOW QUALITY PROTEIN: uncharacterized protein LOC108767878 [Trachymyrmex cornetzi]	Domain of unknown function (DUF3635)	[D] KOG2464 Serine/threonine kinase (haspin family)	Serine/threonine-protein kinase haspin OS=Homo sapiens GN=GSG2 PE=1 SV=3
CL1097.Contig1_All	0.763	2.843	1.8948	2.7969e-27	1.48114e-27					Domain of unknown function (DUF3548)
CL1097.Contig2_All	0.376	2.56	2.76556	1.05946e-39	4.25743e-40					Domain of unknown function (DUF3548)
CL1098.Contig5_All	2.616	5.703	1.10833	3.26519e-137	4.41866e-138		K12386//cystinosin+ko04142//Lysosome;K12386//cystinosin+ko04142//Lysosome;K12386//cystinosin+ko04142//Lysosome;K12386//cystinosin+ko04142//Lysosome;K12386//cystinosin+ko04142//Lysosome	XM_008555860.2 PREDICTED: Microplitis demolitor sialin (LOC103575879), transcript variant X2, mRNA	PREDICTED: sialin-like [Bemisia tabaci] >XP_018909290.1 PREDICTED: sialin-like [Bemisia tabaci]	Major Facilitator Superfamily	[E] KOG3145 Cystine transporter Cystinosin	Cystinosin homolog OS=Drosophila melanogaster GN=CG17119 PE=1 SV=2	GO:0055085//transmembrane transport;GO:0016021//integral component of membrane
CL11.Contig1_All	0.663	1.46	1.1334	3.24342e-37	1.36752e-37		K19613//leucine-rich repeat protein SHOC2+ko04014//Ras signaling pathway;K19613//leucine-rich repeat protein SHOC2+ko04014//Ras signaling pathway;K19613//leucine-rich repeat protein SHOC2+ko04014//Ras signaling pathway;K19613//leucine-rich repeat protein SHOC2+ko04014//Ras signaling pathway;K19613//leucine-rich repeat protein SHOC2+ko04014//Ras signaling pathway	XM_018716846.1 PREDICTED: Anoplophora glabripennis leucine-rich repeat protein soc-2 homolog (LOC108911812), mRNA	leucine-rich repeat protein soc-2 homolog [Pieris rapae]	Leucine rich repeat	[R] KOG0619 FOG: Leucine rich repeat	Leucine-rich repeat protein soc-2 homolog OS=Culex quinquefasciatus GN=Sur-8 PE=3 SV=1
CL11.Contig3_All	0.276	0.773	1.46549	3.72631e-11	3.46304e-11			FJ263680.1 Sus scrofa clone CH242-27L18 acetyl-coenzyme A carboxylase alpha (ACACA) gene, complete cds	hypothetical protein TRFO_13844 [Tritrichomonas foetus]
CL110.Contig2_All	0.383	2.836	2.88971	5.23806e-125	7.72615e-126		K03995//complement component 6+ko05322//Systemic lupus erythematosus+ko04610//Complement and coagulation cascades+ko05020//Prion diseases;K03995//complement component 6+ko05322//Systemic lupus erythematosus+ko04610//Complement and coagulation cascades+ko05020//Prion diseases;K03995//complement component 6+ko05322//Systemic lupus erythematosus+ko04610//Complement and coagulation cascades+ko05020//…	XM_001963920.2 Drosophila ananassae uncharacterized protein (Dana\GF21300), mRNA	PREDICTED: somatomedin-B and thrombospondin type-1 domain-containing protein [Acyrthosiphon pisum]	Insulin/IGF/Relaxin family	[W] KOG3539 Spondins, extracellular matrix proteins	Spondin-1 OS=Rattus norvegicus GN=Spon1 PE=1 SV=1	GO:0005044//scavenger receptor activity;GO:0030247//polysaccharide binding;GO:0006955//immune response
CL1103.Contig2_All	6.873	25.413	1.87903	0	0		K07192//flotillin+ko04910//Insulin signaling pathway;K07192//flotillin+ko04910//Insulin signaling pathway;K07192//flotillin+ko04910//Insulin signaling pathway;K07192//flotillin+ko04910//Insulin signaling pathway;K07192//flotillin+ko04910//Insulin signaling pathway		PREDICTED: flotillin-2 isoform X1 [Cimex lectularius]	SPFH domain / Band 7 family	[UZ] KOG2668 Flotillins	Flotillin-2 OS=Drosophila melanogaster GN=Flo2 PE=2 SV=3
CL1103.Contig3_All	2.273	5.013	1.14247	2.19605e-49	7.43555e-50		K07192//flotillin+ko04910//Insulin signaling pathway;K07192//flotillin+ko04910//Insulin signaling pathway;K07192//flotillin+ko04910//Insulin signaling pathway;K07192//flotillin+ko04910//Insulin signaling pathway;K07192//flotillin+ko04910//Insulin signaling pathway		PREDICTED: flotillin-2 isoform X1 [Cimex lectularius]	SPFH domain / Band 7 family	[UZ] KOG2668 Flotillins	Flotillin-2a OS=Danio rerio GN=flot2a PE=2 SV=2
CL1104.Contig1_All	22.636	51.63	1.18525	0	0					Protein of unknown function (DUF1443)
CL1108.Contig1_All	0.2	16.453	6.36539	0	0		K05688//PTEN induced putative kinase 1 [EC:2.7.11.1]+ko04137//Mitophagy - animal+ko05012//Parkinson disease		serine/threonine-protein kinase PINK1, mitochondrial [Myzus persicae]	Protein kinase domain	[T] KOG4158 BRPK/PTEN-induced protein kinase	Serine/threonine-protein kinase PINK1, mitochondrial OS=Homo sapiens GN=PINK1 PE=1 SV=1	GO:0005524//ATP binding;GO:0004672//protein kinase activity
CL111.Contig2_All	0.153	1.57	3.35618	6.04681e-85	1.2856e-85	zf-C2H2	K17585//phosphatase and actin regulator 4;K17585//phosphatase and actin regulator 4;K17585//phosphatase and actin regulator 4;K17585//phosphatase and actin regulator 4;K17585//phosphatase and actin regulator 4	XM_015655270.1 PREDICTED: Neodiprion lecontei phosphatase and actin regulator 1-like (LOC107217655), mRNA	PREDICTED: phosphatase and actin regulator 2 isoform X1 [Alligator sinensis]	RPEL repeat	[R] KOG4339 RPEL repeat-containing protein	Phosphatase and actin regulator 1 OS=Xenopus laevis GN=phactr1 PE=2 SV=1	GO:0003779//actin binding;GO:0004864//protein phosphatase inhibitor activity
CL111.Contig5_All	0.633	3.406	2.44186	2.59586e-177	2.70308e-178	zf-C2H2	K17585//phosphatase and actin regulator 4;K17585//phosphatase and actin regulator 4;K17585//phosphatase and actin regulator 4;K17585//phosphatase and actin regulator 4;K17585//phosphatase and actin regulator 4	XM_015655270.1 PREDICTED: Neodiprion lecontei phosphatase and actin regulator 1-like (LOC107217655), mRNA	PREDICTED: phosphatase and actin regulator 2 isoform X5 [Dinoponera quadriceps]	RPEL repeat	[R] KOG4339 RPEL repeat-containing protein	Phosphatase and actin regulator 1 OS=Xenopus laevis GN=phactr1 PE=2 SV=1
CL1111.Contig2_All	0.25	1.326	2.4023	1.06421e-19	7.0365e-20	CSD	K15176//RNA polymerase-associated protein CTR9;K17586//PHD and RING finger domain-containing protein 1;K12893//splicing factor, arginine/serine-rich 4/5/6+ko03040//Spliceosome+ko05168//Herpes simplex infection;K12893//splicing factor, arginine/serine-rich 4/5/6+ko03040//Spliceosome+ko05168//Herpes simplex infection;K12893//splicing factor, arginine/serine-rich 4/5/6+ko03040//Spliceosome+ko05168//…		PREDICTED: RNA polymerase-associated protein CTR9 homolog isoform X1 [Anoplophora glabripennis]		[A] KOG0106 Alternative splicing factor SRp55/B52/SRp75 (RRM superfamily)	Serine/arginine-rich splicing factor 4 OS=Mus musculus GN=Srsf4 PE=2 SV=1
CL1112.Contig1_All	2.27	8.906	1.96911	9.8522e-132	1.37717e-132
CL1112.Contig4_All	5.823	13.146	1.16997	7.19075e-102	1.29043e-102
CL1114.Contig1_All	0.49	1.416	1.51518	2.85696e-58	8.35352e-59		K07964//heparanase [EC:3.2.1.166]+ko00531//Glycosaminoglycan degradation+ko05205//Proteoglycans in cancer+ko01100//Metabolic pathways;K07964//heparanase [EC:3.2.1.166]+ko00531//Glycosaminoglycan degradation+ko05205//Proteoglycans in cancer+ko01100//Metabolic pathways;K07964//heparanase [EC:3.2.1.166]+ko00531//Glycosaminoglycan degradation+ko05205//Proteoglycans in cancer+ko01100//Metabolic pathwa…		PREDICTED: microtubule-associated protein futsch-like [Bemisia tabaci]		[T] KOG0587 Traf2- and Nck-interacting kinase and related germinal center kinase (GCK) family protein kinases	Trichohyalin OS=Homo sapiens GN=TCHH PE=1 SV=2	GO:0016020//membrane;GO:0016798//hydrolase activity, acting on glycosyl bonds
CL1114.Contig2_All	0.066	0.143	1.14212	2.65079e-05	3.61228e-05		K07964//heparanase [EC:3.2.1.166]+ko00531//Glycosaminoglycan degradation+ko05205//Proteoglycans in cancer+ko01100//Metabolic pathways;K07964//heparanase [EC:3.2.1.166]+ko00531//Glycosaminoglycan degradation+ko05205//Proteoglycans in cancer+ko01100//Metabolic pathways;K07964//heparanase [EC:3.2.1.166]+ko00531//Glycosaminoglycan degradation+ko05205//Proteoglycans in cancer+ko01100//Metabolic pathwa…		PREDICTED: microtubule-associated protein futsch-like [Bemisia tabaci]		[O] TWOG0241 Heparanase	DNA ligase 1 OS=Dictyostelium discoideum GN=lig1 PE=3 SV=1	GO:0016020//membrane;GO:0016798//hydrolase activity, acting on glycosyl bonds
CL1114.Contig3_All	11.383	24.67	1.10542	0	0	zf-C2H2	K07964//heparanase [EC:3.2.1.166]+ko00531//Glycosaminoglycan degradation+ko05205//Proteoglycans in cancer+ko01100//Metabolic pathways;K07964//heparanase [EC:3.2.1.166]+ko00531//Glycosaminoglycan degradation+ko05205//Proteoglycans in cancer+ko01100//Metabolic pathways;K07964//heparanase [EC:3.2.1.166]+ko00531//Glycosaminoglycan degradation+ko05205//Proteoglycans in cancer+ko01100//Metabolic pathwa…		PREDICTED: microtubule-associated protein futsch-like [Bemisia tabaci]		[W] KOG3544 Collagens (type IV and type XIII), and related proteins	Sialidase OS=Trypanosoma cruzi GN=TCNA PE=2 SV=1	GO:0016020//membrane;GO:0016798//hydrolase activity, acting on glycosyl bonds
CL1114.Contig4_All	16.633	38.066	1.18706	0	0		K07964//heparanase [EC:3.2.1.166]+ko00531//Glycosaminoglycan degradation+ko05205//Proteoglycans in cancer+ko01100//Metabolic pathways;K07964//heparanase [EC:3.2.1.166]+ko00531//Glycosaminoglycan degradation+ko05205//Proteoglycans in cancer+ko01100//Metabolic pathways;K07964//heparanase [EC:3.2.1.166]+ko00531//Glycosaminoglycan degradation+ko05205//Proteoglycans in cancer+ko01100//Metabolic pathwa…		PREDICTED: microtubule-associated protein futsch-like [Bemisia tabaci]		[T] KOG0587 Traf2- and Nck-interacting kinase and related germinal center kinase (GCK) family protein kinases	Protein split ends OS=Drosophila melanogaster GN=spen PE=1 SV=2	GO:0016020//membrane;GO:0016798//hydrolase activity, acting on glycosyl bonds
CL1114.Contig5_All	12.523	28.773	1.19118	0	0		K07964//heparanase [EC:3.2.1.166]+ko00531//Glycosaminoglycan degradation+ko05205//Proteoglycans in cancer+ko01100//Metabolic pathways;K07964//heparanase [EC:3.2.1.166]+ko00531//Glycosaminoglycan degradation+ko05205//Proteoglycans in cancer+ko01100//Metabolic pathways;K07964//heparanase [EC:3.2.1.166]+ko00531//Glycosaminoglycan degradation+ko05205//Proteoglycans in cancer+ko01100//Metabolic pathwa…		PREDICTED: microtubule-associated protein futsch-like [Bemisia tabaci]		[W] KOG3544 Collagens (type IV and type XIII), and related proteins	Protein split ends OS=Drosophila melanogaster GN=spen PE=1 SV=2	GO:0016020//membrane;GO:0016798//hydrolase activity, acting on glycosyl bonds
CL1115.Contig2_All	0.35	0.826	1.24813	0.000295233	0.000446444		K00799//glutathione S-transferase [EC:2.5.1.18]+ko00980//Metabolism of xenobiotics by cytochrome P450+ko00982//Drug metabolism - cytochrome P450+ko00983//Drug metabolism - other enzymes+ko05225//Hepatocellular carcinoma+ko01524//Platinum drug resistance+ko05418//Fluid shear stress and atherosclerosis+ko00480//Glutathione metabolism+ko05200//Pathways in cancer+ko05204//Chemical carcinogenesis;K007…		PREDICTED: glutathione S-transferase 1-like [Fopius arisanus] >XP_011314549.1 PREDICTED: glutathione S-transferase 1-like [Fopius arisanus]	Glutathione S-transferase, N-terminal domain	[O] KOG0867 Glutathione S-transferase	Glutathione S-transferase 1, isoform C OS=Anopheles gambiae GN=GstD1 PE=1 SV=2	GO:0004364//glutathione transferase activity;GO:0006749//glutathione metabolic process;GO:0005737//cytoplasm
CL1118.Contig10_All	1.31	5.04	1.93895	1.46979e-127	2.11363e-128		K01904//4-coumarate--CoA ligase [EC:6.2.1.12]+ko00360//Phenylalanine metabolism+ko00130//Ubiquinone and other terpenoid-quinone biosynthesis+ko01100//Metabolic pathways;K01904//4-coumarate--CoA ligase [EC:6.2.1.12]+ko00360//Phenylalanine metabolism+ko00130//Ubiquinone and other terpenoid-quinone biosynthesis+ko01100//Metabolic pathways;K01904//4-coumarate--CoA ligase [EC:6.2.1.12]+ko00360//Phenyl…		PREDICTED: uncharacterized protein LOC109035277 [Bemisia tabaci]	AMP-binding enzyme	[I] KOG1176 Acyl-CoA synthetase	Probable 4-coumarate--CoA ligase 1 OS=Dictyostelium discoideum GN=4cl1 PE=3 SV=1	GO:0008152//metabolic process;GO:0003824//catalytic activity
CL1118.Contig2_All	2.676	12.056	2.15324	9.11387e-218	7.66755e-219		K01904//4-coumarate--CoA ligase [EC:6.2.1.12]+ko00360//Phenylalanine metabolism+ko00130//Ubiquinone and other terpenoid-quinone biosynthesis+ko01100//Metabolic pathways;K01904//4-coumarate--CoA ligase [EC:6.2.1.12]+ko00360//Phenylalanine metabolism+ko00130//Ubiquinone and other terpenoid-quinone biosynthesis+ko01100//Metabolic pathways;K01904//4-coumarate--CoA ligase [EC:6.2.1.12]+ko00360//Phenyl…	AC113285.9 Mus musculus chromosome 5, clone RP23-407I6, complete sequence	probable 4-coumarate--CoA ligase 3 [Myzus persicae] >XP_022165119.1 probable 4-coumarate--CoA ligase 3 [Myzus persicae] >XP_022165120.1 probable 4-coumarate--CoA ligase 3 [Myzus persicae]	AMP-binding enzyme	[I] KOG1176 Acyl-CoA synthetase	Probable 4-coumarate--CoA ligase 1 OS=Dictyostelium discoideum GN=4cl1 PE=3 SV=1	GO:0008152//metabolic process;GO:0003824//catalytic activity
CL1121.Contig1_All	2.223	5.296	1.24957	4.59782e-45	1.67521e-45	zf-C2H2	K20638//Rho GTPase-activating protein 17+ko04530//Tight junction;K06274//vasodilator-stimulated phosphoprotein+ko04022//cGMP-PKG signaling pathway+ko04510//Focal adhesion+ko04611//Platelet activation+ko04666//Fc gamma R-mediated phagocytosis+ko04530//Tight junction+ko04670//Leukocyte transendothelial migration+ko04015//Rap1 signaling pathway;K05748//WAS protein family, member 2+ko05132//Salmonell…		PREDICTED: formin-binding protein 4 [Myotis lucifugus]	Granulocyte-macrophage colony-stimulating factor	[M] LSE0601 A Pollen extensin-like protein (Pex)	Uncharacterized proline-rich protein (Fragment) OS=Owenia fusiformis PE=4 SV=1
CL1122.Contig2_All	1.193	2.63	1.15175	9.87088e-24	5.7573e-24	bHLH	K04461//protein phosphatase 1B [EC:3.1.3.16]+ko04013//MAPK signaling pathway - fly+ko04010//MAPK signaling pathway;K04461//protein phosphatase 1B [EC:3.1.3.16]+ko04013//MAPK signaling pathway - fly+ko04010//MAPK signaling pathway;K04461//protein phosphatase 1B [EC:3.1.3.16]+ko04013//MAPK signaling pathway - fly+ko04010//MAPK signaling pathway;K04461//protein phosphatase 1B [EC:3.1.3.16]+ko04013//…	XM_009904034.1 PREDICTED: Picoides pubescens protein phosphatase, Mg2+/Mn2+ dependent, 1B (PPM1B), mRNA	Protein phosphatase 1B [Zootermopsis nevadensis]	Protein phosphatase 2C	[T] KOG0697 Protein phosphatase 1B (formerly 2C)	Protein phosphatase 1B OS=Rattus norvegicus GN=Ppm1b PE=2 SV=1
CL1124.Contig7_All	4.363	22.016	2.33871	0	0		K12392//AP-1 complex subunit beta-1+ko04142//Lysosome+ko05170//Human immunodeficiency virus 1 infection;K12392//AP-1 complex subunit beta-1+ko04142//Lysosome+ko05170//Human immunodeficiency virus 1 infection;K12392//AP-1 complex subunit beta-1+ko04142//Lysosome+ko05170//Human immunodeficiency virus 1 infection;K12392//AP-1 complex subunit beta-1+ko04142//Lysosome+ko05170//Human immunodeficiency v…	XM_020019013.1 PREDICTED: Aethina tumida AP-1 complex subunit beta-1-like (LOC109602597), mRNA	AP-1 complex subunit beta-1 [Zootermopsis nevadensis] >XP_021918643.1 AP-1 complex subunit beta-1 [Zootermopsis nevadensis] >KDR20112.1 AP-2 complex subunit beta [Zootermopsis nevadensis]	Adaptin N terminal region	[U] KOG1061 Vesicle coat complex AP-1/AP-2/AP-4, beta subunit	AP-1 complex subunit beta-1 OS=Homo sapiens GN=AP1B1 PE=1 SV=2
CL1127.Contig2_All	56.99	131.513	1.20666	0	0		K15730//cytosolic prostaglandin-E synthase [EC:5.3.99.3]+ko00590//Arachidonic acid metabolism+ko01100//Metabolic pathways;K15730//cytosolic prostaglandin-E synthase [EC:5.3.99.3]+ko00590//Arachidonic acid metabolism+ko01100//Metabolic pathways;K15730//cytosolic prostaglandin-E synthase [EC:5.3.99.3]+ko00590//Arachidonic acid metabolism+ko01100//Metabolic pathways;K15730//cytosolic prostaglandin-E…	LT841392.1 Plasmodium cynomolgi genome assembly, chromosome: 14	p23-like protein [Coptotermes formosanus]	CS domain	[O] KOG3158 HSP90 co-chaperone p23	Prostaglandin E synthase 3 OS=Oryctolagus cuniculus GN=PTGES3 PE=3 SV=1
CL1129.Contig3_All	0.863	2.21	1.35492	9.32686e-22	5.74718e-22		K08360//cytochrome b-561 [EC:7.2.1.3];K08360//cytochrome b-561 [EC:7.2.1.3];K08360//cytochrome b-561 [EC:7.2.1.3];K08360//cytochrome b-561 [EC:7.2.1.3]		PREDICTED: cytochrome b561-like isoform X4 [Diuraphis noxia] >XP_015363690.1 PREDICTED: cytochrome b561-like isoform X4 [Diuraphis noxia]	Eukaryotic cytochrome b561	[C] KOG1619 Cytochrome b	Cytochrome b reductase 1 OS=Danio rerio GN=cybrd1 PE=2 SV=1
CL113.Contig3_All	0	0.35	7.31329	4.99945e-19	3.38224e-19	AF-4	K13171//serine/arginine repetitive matrix protein 1+ko03013//RNA transport+ko03015//mRNA surveillance pathway;K20478//golgin subfamily B member 1;K22869//WD repeat-containing protein 60;K14405//pre-mRNA 3'-end-processing factor FIP1+ko03015//mRNA surveillance pathway;K13100//pre-mRNA-splicing factor CWC22		PREDICTED: uncharacterized protein LOC109032965 [Bemisia tabaci]	Heat shock factor binding protein 1	[A] KOG1049 Polyadenylation factor I complex, subunit FIP1	Pre-mRNA-splicing factor 38B OS=Homo sapiens GN=PRPF38B PE=1 SV=1
CL113.Contig7_All	0.623	1.866	1.56005	3.69469e-40	1.46824e-40	AF-4	K13171//serine/arginine repetitive matrix protein 1+ko03013//RNA transport+ko03015//mRNA surveillance pathway;K18626//trichohyalin;K18626//trichohyalin;K13171//serine/arginine repetitive matrix protein 1+ko03013//RNA transport+ko03015//mRNA surveillance pathway		PREDICTED: dentin sialophosphoprotein-like isoform X2 [Cricetulus griseus]	Heat shock factor binding protein 1	[A] KOG4676 Splicing factor, arginine/serine-rich	RNA-binding protein 25 OS=Homo sapiens GN=RBM25 PE=1 SV=3	GO:0003723//RNA binding
CL113.Contig9_All	0	0.043	4.47959	0.000507112	0.000787789	AF-4	K13165//splicing factor, arginine/serine-rich 12;K13165//splicing factor, arginine/serine-rich 12;K22869//WD repeat-containing protein 60;K10624//E3 ubiquitin-protein ligase RBBP6 [EC:2.3.2.27];K13165//splicing factor, arginine/serine-rich 12		PREDICTED: dentin sialophosphoprotein-like isoform X2 [Cricetulus griseus]	Heat shock factor binding protein 1	[A] KOG1049 Polyadenylation factor I complex, subunit FIP1	Pre-mRNA-splicing factor 38B OS=Mus musculus GN=Prpf38b PE=1 SV=1
CL1137.Contig8_All	0.52	1.063	1.05495	2.65746e-05	3.62194e-05
CL1138.Contig1_All	0.053	2.896	5.77781	2.53019e-104	4.42784e-105
CL1143.Contig2_All	0	0.183	5.53463	5.35179e-07	6.36689e-07	RXR-like	K08704//hepatocyte nuclear factor 4;K08704//hepatocyte nuclear factor 4;K08704//hepatocyte nuclear factor 4;K08704//hepatocyte nuclear factor 4	XM_020015517.1 PREDICTED: Aethina tumida hepatocyte nuclear factor 4-gamma (LOC109599515), transcript variant X6, mRNA	PREDICTED: hepatocyte nuclear factor 4-gamma isoform X5 [Nicrophorus vespilloides]	Ligand-binding domain of nuclear hormone receptor	[K] KOG4215 Hepatocyte nuclear factor 4 and similar steroid hormone receptors	Transcription factor HNF-4 homolog OS=Drosophila melanogaster GN=Hnf4 PE=1 SV=3
CL1143.Contig6_All	0	0.14	5.44891	1.11943e-06	1.36303e-06	RXR-like	K08704//hepatocyte nuclear factor 4;K08704//hepatocyte nuclear factor 4;K08704//hepatocyte nuclear factor 4;K08704//hepatocyte nuclear factor 4	XM_020015517.1 PREDICTED: Aethina tumida hepatocyte nuclear factor 4-gamma (LOC109599515), transcript variant X6, mRNA	PREDICTED: transcription factor HNF-4 homolog isoform X3 [Halyomorpha halys]	Ligand-binding domain of nuclear hormone receptor	[K] KOG4215 Hepatocyte nuclear factor 4 and similar steroid hormone receptors	Hepatocyte nuclear factor 4-beta OS=Xenopus laevis GN=hnf4b PE=2 SV=1
CL1152.Contig2_All	0.416	0.86	1.06781	8.38017e-09	8.84928e-09	bHLH	K02177//bruno+ko04320//Dorso-ventral axis formation;K02177//bruno+ko04320//Dorso-ventral axis formation;K02177//bruno+ko04320//Dorso-ventral axis formation;K02177//bruno+ko04320//Dorso-ventral axis formation;K02177//bruno+ko04320//Dorso-ventral axis formation		PREDICTED: CUGBP Elav-like family member 1 isoform X3 [Halyomorpha halys]	RNA recognition motif. (a.k.a. RRM, RBD, or RNP domain)	[A] KOG0144 RNA-binding protein CUGBP1/BRUNO (RRM superfamily)	CUGBP Elav-like family member 1 OS=Gallus gallus GN=CELF1 PE=1 SV=2
CL1156.Contig2_All	1.386	2.923	1.07813	1.69871e-19	1.12872e-19
CL1159.Contig4_All	0	0.053	5.08248	1.75225e-05	2.3545e-05	ZBTB	K10523//speckle-type POZ protein+ko04341//Hedgehog signaling pathway - fly+ko04340//Hedgehog signaling pathway;K10523//speckle-type POZ protein+ko04341//Hedgehog signaling pathway - fly+ko04340//Hedgehog signaling pathway;K10523//speckle-type POZ protein+ko04341//Hedgehog signaling pathway - fly+ko04340//Hedgehog signaling pathway;K10523//speckle-type POZ protein+ko04341//Hedgehog signaling pathw…		PREDICTED: speckle-type POZ protein-like isoform X2 [Erinaceus europaeus]	BTB/POZ domain	[DR] KOG1987 Speckle-type POZ protein SPOP and related proteins with TRAF, MATH and BTB/POZ domains	Speckle-type POZ protein B OS=Xenopus laevis GN=spop-b PE=2 SV=1	GO:0005634//nucleus;GO:0043161//proteasome-mediated ubiquitin-dependent protein catabolic process;GO:0016567//protein ubiquitination;GO:0016607//nuclear speck;GO:0031463//Cul3-RING ubiquitin ligase complex
CL1161.Contig2_All	0	0.296	8.58035	9.52219e-39	3.91238e-39		K07953//GTP-binding protein SAR1 [EC:3.6.5.-]+ko04141//Protein processing in endoplasmic reticulum+ko05134//Legionellosis;K07953//GTP-binding protein SAR1 [EC:3.6.5.-]+ko04141//Protein processing in endoplasmic reticulum+ko05134//Legionellosis;K07953//GTP-binding protein SAR1 [EC:3.6.5.-]+ko04141//Protein processing in endoplasmic reticulum+ko05134//Legionellosis;K07953//GTP-binding protein SAR1 …	LM000652.1 Wuchereria bancrofti genome assembly W_bancrofti_Jakarta ,scaffold WBA_contig0000386	motile sperm domain-containing protein 2-like [Pseudomyrmex gracilis]	ADP-ribosylation factor family	[U] KOG0077 Vesicle coat complex COPII, GTPase subunit SAR1	GTP-binding protein SAR1b OS=Mus musculus GN=Sar1b PE=1 SV=1	GO:0016021//integral component of membrane
CL1165.Contig2_All	0.196	0.476	1.29071	0.000234616	0.000350828
CL1171.Contig3_All	0.166	0.49	1.52765	4.61118e-11	4.30494e-11		K12200//programmed cell death 6-interacting protein+ko04144//Endocytosis;K12200//programmed cell death 6-interacting protein+ko04144//Endocytosis;K12200//programmed cell death 6-interacting protein+ko04144//Endocytosis;K12200//programmed cell death 6-interacting protein+ko04144//Endocytosis;K12200//programmed cell death 6-interacting protein+ko04144//Endocytosis		programmed cell death 6-interacting protein [Zootermopsis nevadensis] >KDR23230.1 Programmed cell death 6-interacting protein [Zootermopsis nevadensis]	BRO1-like domain	[R] KOG2220 Predicted signal transduction protein	Programmed cell death 6-interacting protein OS=Rattus norvegicus GN=Pdcd6ip PE=1 SV=2
CL1172.Contig1_All	0.363	2.763	2.93296	1.53345e-34	6.85388e-35			LK065559.1 Apteryx australis mantelli genome assembly AptMant0, scaffold scaffold110
CL1173.Contig3_All	0.123	2.44	4.26067	0	0		K06255//basement membrane-specific heparan sulfate proteoglycan core protein+ko04512//ECM-receptor interaction+ko05205//Proteoglycans in cancer+ko05161//Hepatitis B;K06255//basement membrane-specific heparan sulfate proteoglycan core protein+ko04512//ECM-receptor interaction+ko05205//Proteoglycans in cancer+ko05161//Hepatitis B;K06255//basement membrane-specific heparan sulfate proteoglycan core …		PREDICTED: basement membrane-specific heparan sulfate proteoglycan core protein isoform X5 [Bemisia tabaci]	Immunoglobulin domain	[O] KOG3509 Basement membrane-specific heparan sulfate proteoglycan (HSPG) core protein	Low-density lipoprotein receptor-related protein 1B OS=Mus musculus GN=Lrp1b PE=1 SV=1
CL1174.Contig1_All	0.206	0.626	1.59266	2.28524e-10	2.20103e-10		K15076//elongin-A;K10779//transcriptional regulator ATRX [EC:3.6.4.12];K17552//protein phosphatase 1 regulatory subunit 10;K10624//E3 ubiquitin-protein ligase RBBP6 [EC:2.3.2.27];K15076//elongin-A		protein suppressor of white apricot-like [Nilaparvata lugens]	Surp module	[A] KOG0007 Splicing factor 3a, subunit 1	Micronuclear linker histone polyprotein OS=Tetrahymena thermophila (strain SB210) GN=MLH PE=1 SV=2
CL1179.Contig4_All	0.29	0.633	1.10993	2.17133e-08	2.35377e-08		K01187//alpha-glucosidase [EC:3.2.1.20]+ko00052//Galactose metabolism+ko00500//Starch and sucrose metabolism+ko01100//Metabolic pathways;K01187//alpha-glucosidase [EC:3.2.1.20]+ko00052//Galactose metabolism+ko00500//Starch and sucrose metabolism+ko01100//Metabolic pathways;K01187//alpha-glucosidase [EC:3.2.1.20]+ko00052//Galactose metabolism+ko00500//Starch and sucrose metabolism+ko01100//Metabol…	AC119155.6 Mus musculus chromosome 3, clone RP23-43A4, complete sequence	maltase A1-like [Myzus persicae]	Alpha amylase, catalytic domain	[G] KOG0471 Alpha-amylase	Alpha-glucosidase OS=Apis mellifera PE=1 SV=1	GO:0005975//carbohydrate metabolic process;GO:0003824//catalytic activity
CL1186.Contig1_All	0.88	1.84	1.07301	3.21716e-08	3.52944e-08		K18439//Arf-GAP with Rho-GAP domain, ANK repeat and PH domain-containing protein 1+ko04144//Endocytosis;K18439//Arf-GAP with Rho-GAP domain, ANK repeat and PH domain-containing protein 1+ko04144//Endocytosis		arf-GAP with Rho-GAP domain, ANK repeat and PH domain-containing protein 3 [Nilaparvata lugens]				GO:0007165//signal transduction;GO:0005096//GTPase activator activity
CL119.Contig2_All	1.05	7.326	2.80267	8.43723e-143	1.10509e-143		K22076//mitochondrial fission factor;K22076//mitochondrial fission factor;K22076//mitochondrial fission factor;K22076//mitochondrial fission factor;K22076//mitochondrial fission factor		transport and Golgi organization protein 11 isoform X2 [Zootermopsis nevadensis] >XP_021924304.1 transport and Golgi organization protein 11 isoform X2 [Zootermopsis nevadensis] >KDR17158.1 Transport and Golgi organization protein 11 [Zootermopsis nevadensis]	Mitochondrial and peroxisomal fission factor Mff		Transport and Golgi organization protein 11 OS=Drosophila melanogaster GN=Tango11 PE=1 SV=1
CL1191.Contig1_All	0.04	0.92	4.58682	1.03435e-92	2.01586e-93		K15424//serine/threonine-protein phosphatase 4 regulatory subunit 1;K15424//serine/threonine-protein phosphatase 4 regulatory subunit 1;K15424//serine/threonine-protein phosphatase 4 regulatory subunit 1;K15424//serine/threonine-protein phosphatase 4 regulatory subunit 1;K15424//serine/threonine-protein phosphatase 4 regulatory subunit 1		PREDICTED: serine/threonine-protein phosphatase 4 regulatory subunit 1-like isoform X1 [Cephus cinctus]	HEAT repeat	[T] KOG0211 Protein phosphatase 2A regulatory subunit A and related proteins	Serine/threonine-protein phosphatase 4 regulatory subunit 1 OS=Mus musculus GN=Ppp4r1 PE=1 SV=2
CL1191.Contig2_All	0.6	1.773	1.56068	2.67174e-48	9.17976e-49		K15424//serine/threonine-protein phosphatase 4 regulatory subunit 1;K15424//serine/threonine-protein phosphatase 4 regulatory subunit 1;K15424//serine/threonine-protein phosphatase 4 regulatory subunit 1;K15424//serine/threonine-protein phosphatase 4 regulatory subunit 1;K15424//serine/threonine-protein phosphatase 4 regulatory subunit 1		PREDICTED: serine/threonine-protein phosphatase 4 regulatory subunit 1-like isoform X1 [Halyomorpha halys]	Putative WW-binding domain and destruction box	[T] KOG0211 Protein phosphatase 2A regulatory subunit A and related proteins	Serine/threonine-protein phosphatase 4 regulatory subunit 1 OS=Mus musculus GN=Ppp4r1 PE=1 SV=2
CL1191.Contig4_All	1.173	5.666	2.27076	4.44394e-215	3.7677e-216		K15424//serine/threonine-protein phosphatase 4 regulatory subunit 1;K15424//serine/threonine-protein phosphatase 4 regulatory subunit 1;K15424//serine/threonine-protein phosphatase 4 regulatory subunit 1;K15424//serine/threonine-protein phosphatase 4 regulatory subunit 1;K15424//serine/threonine-protein phosphatase 4 regulatory subunit 1	AY360136.1 Dictyostelium discoideum putative G protein-coupled receptor CrlB (crlB) gene, complete cds	PREDICTED: serine/threonine-protein phosphatase 4 regulatory subunit 1-like isoform X1 [Halyomorpha halys]	Putative WW-binding domain and destruction box	[T] KOG0211 Protein phosphatase 2A regulatory subunit A and related proteins	Serine/threonine-protein phosphatase 4 regulatory subunit 1 OS=Mus musculus GN=Ppp4r1 PE=1 SV=2
CL120.Contig2_All	1.886	17.076	3.17869	1.17629e-293	7.36459e-295		K02542//DNA replication licensing factor MCM6 [EC:3.6.4.12]+ko03030//DNA replication+ko04110//Cell cycle		sideroflexin-1 [Myzus persicae]	Tricarboxylate carrier	[R] KOG3767 Sideroflexin	Sideroflexin-1 OS=Homo sapiens GN=SFXN1 PE=1 SV=4	GO:0015075//ion transmembrane transporter activity;GO:0016021//integral component of membrane;GO:0031966//mitochondrial membrane
CL120.Contig4_All	0	1.046	6.99377	7.0602e-16	5.36576e-16		K02542//DNA replication licensing factor MCM6 [EC:3.6.4.12]+ko03030//DNA replication+ko04110//Cell cycle		sideroflexin-1 [Myzus persicae]	Tricarboxylate carrier	[R] KOG3767 Sideroflexin	Sideroflexin-3 OS=Pongo abelii GN=SFXN3 PE=2 SV=1	GO:0015075//ion transmembrane transporter activity;GO:0016021//integral component of membrane;GO:0031966//mitochondrial membrane
CL1206.Contig2_All	1.63	3.65	1.19026	5.48039e-08	6.08979e-08
CL1211.Contig2_All	1.166	2.453	1.05654	4.85245e-14	3.9653e-14		K16882//protein piccolo+ko04911//Insulin secretion;K13912//deleted in malignant brain tumors 1 protein+ko04970//Salivary secretion;K11722//bromodomain-containing protein 4;K10955//mucin-2+ko05226//Gastric cancer+ko05146//Amoebiasis;K16882//protein piccolo+ko04911//Insulin secretion		PREDICTED: protein TsetseEP-like [Esox lucius]		[T] KOG1187 Serine/threonine protein kinase	Protein piccolo OS=Mus musculus GN=Pclo PE=1 SV=4
CL1212.Contig1_All	0.44	1.78	2.01059	1.56461e-13	1.3056e-13		K20674//modular serine protease [EC:3.4.21.-]+ko04624//Toll and Imd signaling pathway;K20674//modular serine protease [EC:3.4.21.-]+ko04624//Toll and Imd signaling pathway;K20674//modular serine protease [EC:3.4.21.-]+ko04624//Toll and Imd signaling pathway;K20674//modular serine protease [EC:3.4.21.-]+ko04624//Toll and Imd signaling pathway;K20674//modular serine protease [EC:3.4.21.-]+ko04624//…		LOW QUALITY PROTEIN: uncharacterized protein LOC111034526 [Myzus persicae]	Trypsin
CL1216.Contig2_All	0.25	0.606	1.28523	6.7677e-10	6.67649e-10	ZBTB	K02174//broad-complex core protein+ko04320//Dorso-ventral axis formation+ko04214//Apoptosis - fly;K02174//broad-complex core protein+ko04320//Dorso-ventral axis formation+ko04214//Apoptosis - fly;K02174//broad-complex core protein+ko04320//Dorso-ventral axis formation+ko04214//Apoptosis - fly;K02174//broad-complex core protein+ko04320//Dorso-ventral axis formation+ko04214//Apoptosis - fly	XM_015262432.1 PREDICTED: Diachasma alloeum protein abrupt (LOC107041729), transcript variant X4, mRNA	PREDICTED: protein abrupt-like isoform X2 [Cimex lectularius]	BTB/POZ domain	[R] KOG1721 FOG: Zn-finger	Protein abrupt OS=Drosophila melanogaster GN=ab PE=1 SV=2
CL1220.Contig1_All	0.163	0.87	2.4058	1.87167e-14	1.50466e-14		K10571//de-etiolated-1+ko04120//Ubiquitin mediated proteolysis		MFS-type transporter SLC18B1-like [Pieris rapae]	Major Facilitator Superfamily	[U] KOG3764 Vesicular amine transporter	MFS-type transporter SLC18B1 OS=Mus musculus GN=Slc18b1 PE=2 SV=2
CL1227.Contig2_All	0.123	0.26	1.05015	1.06528e-05	1.40802e-05		K13046//tolkin [EC:3.4.24.-];K13046//tolkin [EC:3.4.24.-];K13046//tolkin [EC:3.4.24.-];K13046//tolkin [EC:3.4.24.-];K13046//tolkin [EC:3.4.24.-]	XM_014614387.1 PREDICTED: Dinoponera quadriceps bone morphogenetic protein 1-like (LOC106741936), mRNA	tolloid-like protein 1 [Myzus persicae]	CUB domain	[O] KOG3714 Meprin A metalloprotease	Tolloid-like protein 1 OS=Gallus gallus GN=TLL1 PE=2 SV=1
CL1228.Contig1_All	0.596	1.993	1.74157	4.84372e-39	1.97434e-39			LT634571.1 Sus scrofa genome assembly, chromosome: X	hypothetical protein CLF_100574 [Clonorchis sinensis]
CL1230.Contig2_All	6.863	19.37	1.49688	1.79337e-258	1.2924e-259		K04716//sphingosine-1-phosphate phosphatase 1 [EC:3.1.3.-]+ko04071//Sphingolipid signaling pathway+ko00600//Sphingolipid metabolism;K04716//sphingosine-1-phosphate phosphatase 1 [EC:3.1.3.-]+ko04071//Sphingolipid signaling pathway+ko00600//Sphingolipid metabolism;K04716//sphingosine-1-phosphate phosphatase 1 [EC:3.1.3.-]+ko04071//Sphingolipid signaling pathway+ko00600//Sphingolipid metabolism;K04…		sphingosine-1-phosphate phosphatase 2-like [Myzus persicae]	PAP2 superfamily	[I] KOG2822 Sphingoid base-phosphate phosphatase	Sphingosine-1-phosphate phosphatase 2 OS=Mus musculus GN=Sgpp2 PE=2 SV=1	GO:0016021//integral component of membrane
CL124.Contig14_All	1.026	2.923	1.49793	2.08729e-100	3.78889e-101		K19015//inter-alpha-trypsin inhibitor heavy chain H2;K19014//inter-alpha-trypsin inhibitor heavy chain H1;K19014//inter-alpha-trypsin inhibitor heavy chain H1;K19014//inter-alpha-trypsin inhibitor heavy chain H1;K19014//inter-alpha-trypsin inhibitor heavy chain H1	XM_009057045.1 Lottia gigantea hypothetical protein mRNA	inter-alpha-trypsin inhibitor heavy chain H3-like [Myzus persicae]	Vault protein inter-alpha-trypsin domain	[O] LSE2193 H Plasma inter-alpha-trypsin inhibitor	Inter-alpha-trypsin inhibitor heavy chain H4 OS=Sus scrofa GN=ITIH4 PE=1 SV=1
CL124.Contig1_All	0	0.07	6.12361	1.05173e-09	1.04945e-09		K19015//inter-alpha-trypsin inhibitor heavy chain H2;K19014//inter-alpha-trypsin inhibitor heavy chain H1;K19014//inter-alpha-trypsin inhibitor heavy chain H1;K19014//inter-alpha-trypsin inhibitor heavy chain H1;K19014//inter-alpha-trypsin inhibitor heavy chain H1	XM_009057045.1 Lottia gigantea hypothetical protein mRNA	inter-alpha-trypsin inhibitor heavy chain H3-like [Myzus persicae]	Vault protein inter-alpha-trypsin domain	[O] LSE2193 H Plasma inter-alpha-trypsin inhibitor	Inter-alpha-trypsin inhibitor heavy chain H4 OS=Sus scrofa GN=ITIH4 PE=1 SV=1
CL124.Contig28_All	0	0.03	4.99562	3.09397e-05	4.24076e-05		K19015//inter-alpha-trypsin inhibitor heavy chain H2;K19014//inter-alpha-trypsin inhibitor heavy chain H1;K19014//inter-alpha-trypsin inhibitor heavy chain H1;K19014//inter-alpha-trypsin inhibitor heavy chain H1;K19014//inter-alpha-trypsin inhibitor heavy chain H1	XM_009057045.1 Lottia gigantea hypothetical protein mRNA	inter-alpha-trypsin inhibitor heavy chain H3-like [Myzus persicae]	Vault protein inter-alpha-trypsin domain	[O] LSE2193 H Plasma inter-alpha-trypsin inhibitor	Inter-alpha-trypsin inhibitor heavy chain H4 OS=Sus scrofa GN=ITIH4 PE=1 SV=1
CL124.Contig3_All	0	0.046	5.62153	2.43214e-07	2.82631e-07		K19015//inter-alpha-trypsin inhibitor heavy chain H2;K19014//inter-alpha-trypsin inhibitor heavy chain H1;K19014//inter-alpha-trypsin inhibitor heavy chain H1;K19014//inter-alpha-trypsin inhibitor heavy chain H1;K19014//inter-alpha-trypsin inhibitor heavy chain H1	XM_009057045.1 Lottia gigantea hypothetical protein mRNA	inter-alpha-trypsin inhibitor heavy chain H3-like [Myzus persicae]	Vault protein inter-alpha-trypsin domain	[O] LSE2193 H Plasma inter-alpha-trypsin inhibitor	Inter-alpha-trypsin inhibitor heavy chain H4 OS=Sus scrofa GN=ITIH4 PE=1 SV=1
CL124.Contig5_All	0.053	0.25	2.19266	1.00807e-14	8.01965e-15		K19015//inter-alpha-trypsin inhibitor heavy chain H2;K19014//inter-alpha-trypsin inhibitor heavy chain H1;K19014//inter-alpha-trypsin inhibitor heavy chain H1;K19014//inter-alpha-trypsin inhibitor heavy chain H1;K19014//inter-alpha-trypsin inhibitor heavy chain H1	XM_009057045.1 Lottia gigantea hypothetical protein mRNA	PREDICTED: inter-alpha-trypsin inhibitor heavy chain H3-like [Diuraphis noxia]	Vault protein inter-alpha-trypsin domain	[O] LSE2193 H Plasma inter-alpha-trypsin inhibitor	Inter-alpha-trypsin inhibitor heavy chain H3 OS=Bos taurus GN=ITIH3 PE=1 SV=2
CL124.Contig6_All	0.01	0.33	5.04268	2.16229e-36	9.28376e-37		K19015//inter-alpha-trypsin inhibitor heavy chain H2;K19014//inter-alpha-trypsin inhibitor heavy chain H1;K19014//inter-alpha-trypsin inhibitor heavy chain H1;K19014//inter-alpha-trypsin inhibitor heavy chain H1;K19014//inter-alpha-trypsin inhibitor heavy chain H1	XM_009057045.1 Lottia gigantea hypothetical protein mRNA	PREDICTED: inter-alpha-trypsin inhibitor heavy chain H4 [Acyrthosiphon pisum]	Vault protein inter-alpha-trypsin domain	[O] LSE2193 H Plasma inter-alpha-trypsin inhibitor	Inter-alpha-trypsin inhibitor heavy chain H4 OS=Sus scrofa GN=ITIH4 PE=1 SV=1
CL124.Contig8_All	0	0.373	8.49641	5.56197e-37	2.3584e-37		K19015//inter-alpha-trypsin inhibitor heavy chain H2;K19014//inter-alpha-trypsin inhibitor heavy chain H1;K19014//inter-alpha-trypsin inhibitor heavy chain H1;K19014//inter-alpha-trypsin inhibitor heavy chain H1;K19014//inter-alpha-trypsin inhibitor heavy chain H1	XM_009057045.1 Lottia gigantea hypothetical protein mRNA	inter-alpha-trypsin inhibitor heavy chain H3-like [Myzus persicae]	Vault protein inter-alpha-trypsin domain	[O] LSE2193 H Plasma inter-alpha-trypsin inhibitor	Inter-alpha-trypsin inhibitor heavy chain H4 OS=Sus scrofa GN=ITIH4 PE=1 SV=1
CL1244.Contig2_All	0.17	0.493	1.58915	1.8145e-10	1.73778e-10		K00166//2-oxoisovalerate dehydrogenase E1 component alpha subunit [EC:1.2.4.4]+ko00640//Propanoate metabolism+ko00280//Valine, leucine and isoleucine degradation+ko01100//Metabolic pathways;K00166//2-oxoisovalerate dehydrogenase E1 component alpha subunit [EC:1.2.4.4]+ko00640//Propanoate metabolism+ko00280//Valine, leucine and isoleucine degradation+ko01100//Metabolic pathways;K00166//2-oxoisoval…		PREDICTED: 2-oxoisovalerate dehydrogenase subunit alpha, mitochondrial [Acyrthosiphon pisum]	Dehydrogenase E1 component	[C] KOG1182 Branched chain alpha-keto acid dehydrogenase complex, alpha subunit	2-oxoisovalerate dehydrogenase subunit alpha, mitochondrial OS=Mus musculus GN=Bckdha PE=1 SV=1
CL1250.Contig2_All	0.016	0.68	5.19999	2.33088e-11	2.14517e-11		K07232//glutathione-specific gamma-glutamylcyclotransferase [EC:4.3.2.7]+ko00480//Glutathione metabolism+ko01100//Metabolic pathways		PREDICTED: putative glutathione-specific gamma-glutamylcyclotransferase 2 [Microplitis demolitor]		[P] KOG3182 Predicted cation transporter	Putative glutathione-specific gamma-glutamylcyclotransferase 2 OS=Danio rerio GN=chac2 PE=2 SV=1
CL1250.Contig4_All	0.236	0.986	2.07122	1.67235e-13	1.39714e-13		K07232//glutathione-specific gamma-glutamylcyclotransferase [EC:4.3.2.7]+ko00480//Glutathione metabolism+ko01100//Metabolic pathways		PREDICTED: putative glutathione-specific gamma-glutamylcyclotransferase 2 isoform X1 [Nicrophorus vespilloides]	ChaC-like protein	[P] KOG3182 Predicted cation transporter	Putative glutathione-specific gamma-glutamylcyclotransferase 2 OS=Gallus gallus GN=chac2 PE=2 SV=1	GO:0003839//gamma-glutamylcyclotransferase activity;GO:0006751//glutathione catabolic process
CL1251.Contig1_All	0.62	3.986	2.68212	0	0	HMG	K11798//bromodomain and WD repeat domain containing protein 1/3;K11798//bromodomain and WD repeat domain containing protein 1/3;K11798//bromodomain and WD repeat domain containing protein 1/3;K11798//bromodomain and WD repeat domain containing protein 1/3;K11798//bromodomain and WD repeat domain containing protein 1/3	XM_010199065.1 PREDICTED: Colius striatus bromodomain and WD repeat-containing protein 1-like (LOC104555578), partial mRNA	PREDICTED: bromodomain and WD repeat-containing protein 3 [Bemisia tabaci]	Bromodomain	[R] KOG0644 Uncharacterized conserved protein, contains WD40 repeat and BROMO domains	Bromodomain and WD repeat-containing protein 3 OS=Mus musculus GN=Brwd3 PE=1 SV=1
CL1256.Contig2_All	0.223	1.246	2.49498	1.16083e-16	8.56619e-17				hypothetical protein RP20_CCG019614 [Aedes albopictus] >KXJ75333.1 hypothetical protein RP20_CCG011927 [Aedes albopictus] >KXJ76962.1 hypothetical protein RP20_CCG008579 [Aedes albopictus]		[R] KOG0017 FOG: Transposon-encoded proteins with TYA, reverse transcriptase, integrase domains in various combinations
CL1260.Contig1_All	0.273	6.963	4.68869	1.21095e-55	3.70262e-56		K02325//DNA polymerase epsilon subunit 2 [EC:2.7.7.7]+ko03420//Nucleotide excision repair+ko03030//DNA replication+ko03410//Base excision repair;K02325//DNA polymerase epsilon subunit 2 [EC:2.7.7.7]+ko03420//Nucleotide excision repair+ko03030//DNA replication+ko03410//Base excision repair;K02325//DNA polymerase epsilon subunit 2 [EC:2.7.7.7]+ko03420//Nucleotide excision repair+ko03030//DNA replic…		DNA polymerase epsilon subunit 2-like isoform X1 [Mizuhopecten yessoensis] >OWF38563.1 DNA polymerase epsilon subunit 2 [Mizuhopecten yessoensis]		[L] KOG3818 DNA polymerase epsilon, subunit B	DNA polymerase epsilon subunit 2 OS=Homo sapiens GN=POLE2 PE=1 SV=2	GO:0003887//DNA-directed DNA polymerase activity;GO:0003677//DNA binding;GO:0006261//DNA-dependent DNA replication;GO:0008622//epsilon DNA polymerase complex
CL1260.Contig2_All	2.483	13.963	2.49795	0	0	ZBTB	K02325//DNA polymerase epsilon subunit 2 [EC:2.7.7.7]+ko03420//Nucleotide excision repair+ko03030//DNA replication+ko03410//Base excision repair;K02325//DNA polymerase epsilon subunit 2 [EC:2.7.7.7]+ko03420//Nucleotide excision repair+ko03030//DNA replication+ko03410//Base excision repair;K02325//DNA polymerase epsilon subunit 2 [EC:2.7.7.7]+ko03420//Nucleotide excision repair+ko03030//DNA replic…	XM_021730952.1 PREDICTED: Ictidomys tridecemlineatus zinc finger protein 358 (Znf358), mRNA	DNA polymerase epsilon subunit 2 [Zootermopsis nevadensis] >KDR06663.1 DNA polymerase epsilon subunit 2 [Zootermopsis nevadensis]	DNA polymerase alpha/epsilon subunit B	[L] KOG3818 DNA polymerase epsilon, subunit B	DNA polymerase epsilon subunit 2 OS=Bos taurus GN=POLE2 PE=2 SV=1	GO:0003887//DNA-directed DNA polymerase activity;GO:0003677//DNA binding;GO:0006261//DNA-dependent DNA replication;GO:0008622//epsilon DNA polymerase complex
CL1262.Contig11_All	0.063	0.603	3.2484	1.39779e-25	7.75015e-26		K08798//MAP/microtubule affinity-regulating kinase [EC:2.7.11.1];K08798//MAP/microtubule affinity-regulating kinase [EC:2.7.11.1];K08798//MAP/microtubule affinity-regulating kinase [EC:2.7.11.1]	XM_019047812.1 PREDICTED: Bemisia tabaci serine/threonine-protein kinase par-1 (LOC109034582), transcript variant X4, mRNA	serine/threonine-protein kinase MARK2-like isoform X9 [Zootermopsis nevadensis]	Protein kinase domain	[R] KOG0586 Serine/threonine protein kinase	Serine/threonine-protein kinase MARK1 OS=Rattus norvegicus GN=Mark1 PE=1 SV=1
CL1262.Contig9_All	2.343	6.396	1.4324	5.49568e-236	4.26513e-237		K08798//MAP/microtubule affinity-regulating kinase [EC:2.7.11.1];K08798//MAP/microtubule affinity-regulating kinase [EC:2.7.11.1];K08798//MAP/microtubule affinity-regulating kinase [EC:2.7.11.1]	XM_019047812.1 PREDICTED: Bemisia tabaci serine/threonine-protein kinase par-1 (LOC109034582), transcript variant X4, mRNA	serine/threonine-protein kinase MARK2-like isoform X9 [Zootermopsis nevadensis]	Protein kinase domain	[R] KOG0586 Serine/threonine protein kinase	Serine/threonine-protein kinase MARK1 OS=Rattus norvegicus GN=Mark1 PE=1 SV=1
CL1272.Contig1_All	0.663	1.666	1.31809	2.15865e-28	1.11053e-28		K14438//chromodomain-helicase-DNA-binding protein 9 [EC:3.6.4.12];K03514//non-canonical poly(A) RNA polymerase PAPD5/7 [EC:2.7.7.19]+ko03018//RNA degradation	XM_018107747.1 PREDICTED: Drosophila navojoa serine-aspartate repeat-containing protein I (LOC108655924), partial mRNA	uncharacterized protein LOC111036885 isoform X1 [Myzus persicae]	Macro domain	[K] KOG3585 TBX2 and related T-box transcription factors	Uncharacterized protein DDB_G0287625 OS=Dictyostelium discoideum GN=DDB_G0287625 PE=4 SV=1
CL1289.Contig1_All	0.846	1.713	1.02676	1.09685e-28	5.60227e-29	Homeobox	K08867//WNK lysine deficient protein kinase [EC:2.7.11.1];K10955//mucin-2+ko05226//Gastric cancer+ko05146//Amoebiasis;K08867//WNK lysine deficient protein kinase [EC:2.7.11.1];K10955//mucin-2+ko05226//Gastric cancer+ko05146//Amoebiasis;K07604//type I keratin, acidic+ko04915//Estrogen signaling pathway		hypothetical protein L798_08535, partial [Zootermopsis nevadensis]		[ZR] LSE0118 A Protein possibly involved in cytoskeleton rearrangements, contains FH domain	Proline-rich protein 2 OS=Mus musculus GN=Prp2 PE=2 SV=2	GO:0032504//multicellular organism reproduction;GO:0005615//extracellular space
CL1289.Contig9_All	0.313	0.67	1.11365	4.28948e-13	3.64419e-13		K07604//type I keratin, acidic+ko04915//Estrogen signaling pathway;K10955//mucin-2+ko05226//Gastric cancer+ko05146//Amoebiasis;K07604//type I keratin, acidic+ko04915//Estrogen signaling pathway;K08867//WNK lysine deficient protein kinase [EC:2.7.11.1];K08867//WNK lysine deficient protein kinase [EC:2.7.11.1]		PREDICTED: serine/threonine-protein kinase WNK3-like, partial [Aquila chrysaetos canadensis]		[ZR] LSE0118 A Protein possibly involved in cytoskeleton rearrangements, contains FH domain	Proline-rich protein 2 OS=Mus musculus GN=Prp2 PE=2 SV=2
CL1290.Contig1_All	2.246	5.196	1.21286	5.88893e-51	1.94591e-51		K05858//phosphatidylinositol phospholipase C, beta [EC:3.1.4.11]+ko04022//cGMP-PKG signaling pathway+ko04020//Calcium signaling pathway+ko04730//Long-term depression+ko04933//AGE-RAGE signaling pathway in diabetic complications+ko04070//Phosphatidylinositol signaling system+ko04071//Sphingolipid signaling pathway+ko04072//Phospholipase D signaling pathway+ko04919//Thyroid hormone signaling pathwa…		putative uncharacterized protein DDB_G0271606 isoform X3 [Myzus persicae]	Pentapeptide repeats (9 copies)	[A] KOG1960 Predicted RNA-binding protein, contains KH domains	UPF0469 protein KIAA0907 OS=Homo sapiens GN=KIAA0907 PE=1 SV=1
CL1290.Contig4_All	8.173	16.426	1.01023	4.64795e-76	1.09328e-76		K03679//exosome complex component RRP4+ko03018//RNA degradation;K03679//exosome complex component RRP4+ko03018//RNA degradation;K03679//exosome complex component RRP4+ko03018//RNA degradation;K03679//exosome complex component RRP4+ko03018//RNA degradation;K03679//exosome complex component RRP4+ko03018//RNA degradation		PREDICTED: pyrazinamidase/nicotinamidase [Nicrophorus vespilloides] >XP_017781664.1 PREDICTED: pyrazinamidase/nicotinamidase [Nicrophorus vespilloides] >XP_017781665.1 PREDICTED: pyrazinamidase/nicotinamidase [Nicrophorus vespilloides] >XP_017781666.1 PREDICTED: pyrazinamidase/nicotinamidase [Nicrophorus vespilloides]	Isochorismatase family	[V] KOG4003 Pyrazinamidase/nicotinamidase PNC1		GO:0006769//nicotinamide metabolic process;GO:0008936//nicotinamidase activity;GO:0008152//metabolic process;GO:0005509//calcium ion binding;GO:0003824//catalytic activity;GO:0005737//cytoplasm
CL1291.Contig1_All	0	0.27	6.8658	9.10979e-15	7.2413e-15		K06233//low density lipoprotein-related protein 2+ko04918//Thyroid hormone synthesis+ko04340//Hedgehog signaling pathway+ko04979//Cholesterol metabolism;K20052//low-density lipoprotein receptor-related protein 8;K04550//low-density lipoprotein receptor-related protein 1 (alpha-2-macroglobulin receptor)+ko05144//Malaria+ko04979//Cholesterol metabolism+ko05010//Alzheimer disease;K04550//low-density…		PREDICTED: vitellogenin receptor [Dufourea novaeangliae]	Low-density lipoprotein receptor domain class A	[T] KOG1215 Low-density lipoprotein receptors containing Ca2+-binding EGF-like domains	Prolow-density lipoprotein receptor-related protein 1 OS=Homo sapiens GN=LRP1 PE=1 SV=2
CL1291.Contig2_All	0	0.743	8.27872	9.29286e-33	4.31916e-33		K06233//low density lipoprotein-related protein 2+ko04918//Thyroid hormone synthesis+ko04340//Hedgehog signaling pathway+ko04979//Cholesterol metabolism;K20052//low-density lipoprotein receptor-related protein 8;K04550//low-density lipoprotein receptor-related protein 1 (alpha-2-macroglobulin receptor)+ko05144//Malaria+ko04979//Cholesterol metabolism+ko05010//Alzheimer disease;K20052//low-density…		PREDICTED: vitellogenin receptor [Dufourea novaeangliae]	Low-density lipoprotein receptor domain class A	[T] KOG1215 Low-density lipoprotein receptors containing Ca2+-binding EGF-like domains	Prolow-density lipoprotein receptor-related protein 1 OS=Homo sapiens GN=LRP1 PE=1 SV=2
CL1292.Contig5_All	2.583	5.216	1.01257	8.91053e-25	5.03348e-25		K03115//casein kinase II subunit beta+ko04310//Wnt signaling pathway+ko04137//Mitophagy - animal+ko04520//Adherens junction+ko03008//Ribosome biogenesis in eukaryotes+ko04064//NF-kappa B signaling pathway+ko05162//Measles+ko05168//Herpes simplex infection;K03115//casein kinase II subunit beta+ko04310//Wnt signaling pathway+ko04137//Mitophagy - animal+ko04520//Adherens junction+ko03008//Ribosome b…	XM_003490846.2 PREDICTED: Bombus impatiens casein kinase II subunit beta (LOC100750200), transcript variant X3, mRNA	PREDICTED: casein kinase II subunit beta [Agrilus planipennis]	Casein kinase II regulatory subunit	[TDK] KOG3092 Casein kinase II, beta subunit	Casein kinase II subunit beta OS=Bos taurus GN=CSNK2B PE=1 SV=1	GO:0019887//protein kinase regulator activity;GO:0016301//kinase activity;GO:0005956//protein kinase CK2 complex
CL1292.Contig6_All	9.703	29.29	1.59083	9.48657e-256	6.89839e-257		K03115//casein kinase II subunit beta+ko04310//Wnt signaling pathway+ko04137//Mitophagy - animal+ko04520//Adherens junction+ko03008//Ribosome biogenesis in eukaryotes+ko04064//NF-kappa B signaling pathway+ko05162//Measles+ko05168//Herpes simplex infection;K03115//casein kinase II subunit beta+ko04310//Wnt signaling pathway+ko04137//Mitophagy - animal+ko04520//Adherens junction+ko03008//Ribosome b…	XM_003490846.2 PREDICTED: Bombus impatiens casein kinase II subunit beta (LOC100750200), transcript variant X3, mRNA	PREDICTED: casein kinase II subunit beta [Agrilus planipennis]	Casein kinase II regulatory subunit	[TDK] KOG3092 Casein kinase II, beta subunit	Casein kinase II subunit beta OS=Bos taurus GN=CSNK2B PE=1 SV=1	GO:0019887//protein kinase regulator activity;GO:0016301//kinase activity;GO:0005956//protein kinase CK2 complex
CL1297.Contig1_All	10.306	26.453	1.3505	0	0		K11843//ubiquitin carboxyl-terminal hydrolase 14 [EC:3.4.19.12];K11843//ubiquitin carboxyl-terminal hydrolase 14 [EC:3.4.19.12];K11843//ubiquitin carboxyl-terminal hydrolase 14 [EC:3.4.19.12];K11843//ubiquitin carboxyl-terminal hydrolase 14 [EC:3.4.19.12];K11843//ubiquitin carboxyl-terminal hydrolase 14 [EC:3.4.19.12]	XM_001357134.3 Drosophila pseudoobscura pseudoobscura uncharacterized protein (Dpse\GA18840), mRNA	ubiquitin carboxyl-terminal hydrolase 14 [Bombus terrestris]	Ubiquitin carboxyl-terminal hydrolase	[O] KOG1872 Ubiquitin-specific protease	Ubiquitin carboxyl-terminal hydrolase 14 OS=Mus musculus GN=Usp14 PE=1 SV=3
CL130.Contig9_All	0.036	0.23	2.60657	2.01133e-09	2.04893e-09		K16549//myomegalin;K16549//myomegalin;K16549//myomegalin;K16549//myomegalin;K16718//centrosomin	AC122273.4 Mus musculus BAC clone RP23-228B2 from 9, complete sequence	CDK5 regulatory subunit-associated protein 2-like isoform X3 [Nilaparvata lugens]	Centrosomin N-terminal motif 1	[S] KOG4415 Uncharacterized conserved protein	CDK5 regulatory subunit-associated protein 2 OS=Mus musculus GN=Cdk5rap2 PE=1 SV=3
CL1304.Contig2_All	0.053	2.443	5.5323	2.44287e-160	2.81196e-161					Poxvirus entry protein complex L1 and I2
CL1304.Contig5_All	0.953	5.22	2.44746	9.31843e-267	6.57355e-268					Poxvirus entry protein complex L1 and I2
CL1305.Contig4_All	2.373	5.423	1.19509	6.98708e-71	1.73918e-71				PREDICTED: protein FAM102A isoform X3 [Bemisia tabaci]	N-terminal C2 in EEIG1 and EHBP1 proteins	[S] TWOG0010 Uncharacterized conserved protein	Protein FAM102A OS=Xenopus laevis GN=fam102a PE=2 SV=1
CL1310.Contig3_All	0.1	0.52	2.35508	2.11755e-19	1.41461e-19		K04490//transcription factor 7-like 1+ko04390//Hippo signaling pathway+ko05412//Arrhythmogenic right ventricular cardiomyopathy (ARVC)+ko05226//Gastric cancer+ko05225//Hepatocellular carcinoma+ko04916//Melanogenesis+ko04310//Wnt signaling pathway+ko05217//Basal cell carcinoma+ko05216//Thyroid cancer+ko05215//Prostate cancer+ko05213//Endometrial cancer+ko05210//Colorectal cancer+ko05200//Pathways …	XM_015849937.1 PREDICTED: Coturnix japonica leucine rich repeat and Ig domain containing 2 (LINGO2), transcript variant X4, mRNA	PREDICTED: uncharacterized protein LOC105251992 [Camponotus floridanus]	ABC-2 family transporter protein	[U] LSE0321 H Trans-golgi network protein	Trans-Golgi network integral membrane protein 1 OS=Mus musculus GN=Tgoln1 PE=1 SV=1	GO:0016021//integral component of membrane
CL1311.Contig2_All	1.283	2.65	1.05974	3.8319e-16	2.88351e-16				PREDICTED: uncharacterized protein LOC726647 [Apis mellifera]
CL1321.Contig10_All	0.836	2.893	1.79126	4.74184e-129	6.7262e-130	bHLH	K09115//MAX-binding protein;K09115//MAX-binding protein;K00871//phosphorylase kinase gamma subunit [EC:2.7.11.19]+ko04020//Calcium signaling pathway+ko04910//Insulin signaling pathway+ko04922//Glucagon signaling pathway;K00871//phosphorylase kinase gamma subunit [EC:2.7.11.19]+ko04020//Calcium signaling pathway+ko04910//Insulin signaling pathway+ko04922//Glucagon signaling pathway;K00871//phospho…	XM_642128.1 Dictyostelium discoideum AX4 RGS domain-containing protein (DDB_G0267686) mRNA, complete cds	PREDICTED: G-box-binding factor-like isoform X4 [Bombus impatiens]	Helix-loop-helix DNA-binding domain	[K] KOG2483 Upstream transcription factor 2/L-myc-2 protein	Max-binding protein MNT OS=Mus musculus GN=Mnt PE=2 SV=2
CL1328.Contig1_All	0.036	1.8	5.56917	5.63068e-15	4.44089e-15
CL1330.Contig2_All	0.21	0.593	1.48242	5.53118e-13	4.72247e-13
CL1330.Contig6_All	0.32	0.696	1.09543	2.22999e-10	2.14661e-10
CL1333.Contig5_All	1.86	4.07	1.14399	2.15555e-59	6.19722e-60			XM_022311595.1 PREDICTED: Myzus persicae uncharacterized LOC111031573 (LOC111031573), transcript variant X2, mRNA	uncharacterized protein LOC111031573 [Myzus persicae] >XP_022167287.1 uncharacterized protein LOC111031573 [Myzus persicae]	Paralemmin
CL134.Contig23_All	0.033	1.61	5.65079	2.44713e-219	2.04548e-220		K12598//ATP-dependent RNA helicase DOB1 [EC:3.6.4.13]+ko03018//RNA degradation;K12598//ATP-dependent RNA helicase DOB1 [EC:3.6.4.13]+ko03018//RNA degradation;K12598//ATP-dependent RNA helicase DOB1 [EC:3.6.4.13]+ko03018//RNA degradation;K12598//ATP-dependent RNA helicase DOB1 [EC:3.6.4.13]+ko03018//RNA degradation;K12598//ATP-dependent RNA helicase DOB1 [EC:3.6.4.13]+ko03018//RNA degradation	XM_017914479.1 PREDICTED: Nicrophorus vespilloides superkiller viralicidic activity 2-like 2 (LOC108557812), mRNA	PREDICTED: superkiller viralicidic activity 2-like 2 [Nasonia vitripennis]	DSHCT (NUC185) domain	[A] KOG0948 Nuclear exosomal RNA helicase MTR4, DEAD-box superfamily	Superkiller viralicidic activity 2-like 2 OS=Mus musculus GN=Skiv2l2 PE=1 SV=1	GO:0006401//RNA catabolic process;GO:0003723//RNA binding;GO:0005524//ATP binding;GO:0003724//RNA helicase activity
CL134.Contig5_All	0	2.016	11.1485	3.15074e-154	3.81857e-155		K12598//ATP-dependent RNA helicase DOB1 [EC:3.6.4.13]+ko03018//RNA degradation;K12598//ATP-dependent RNA helicase DOB1 [EC:3.6.4.13]+ko03018//RNA degradation;K12598//ATP-dependent RNA helicase DOB1 [EC:3.6.4.13]+ko03018//RNA degradation;K12598//ATP-dependent RNA helicase DOB1 [EC:3.6.4.13]+ko03018//RNA degradation;K12598//ATP-dependent RNA helicase DOB1 [EC:3.6.4.13]+ko03018//RNA degradation	XM_017914479.1 PREDICTED: Nicrophorus vespilloides superkiller viralicidic activity 2-like 2 (LOC108557812), mRNA	PREDICTED: superkiller viralicidic activity 2-like 2 [Nasonia vitripennis]	DSHCT (NUC185) domain	[A] KOG0948 Nuclear exosomal RNA helicase MTR4, DEAD-box superfamily	Superkiller viralicidic activity 2-like 2 OS=Mus musculus GN=Skiv2l2 PE=1 SV=1	GO:0006401//RNA catabolic process;GO:0003723//RNA binding;GO:0005524//ATP binding;GO:0003724//RNA helicase activity
CL1344.Contig3_All	20.476	44.07	1.10718	2.99604e-252	2.2047e-253				hypothetical protein EPH_0016890 [Eimeria praecox]
CL1349.Contig2_All	0	0.076	4.98821	3.23949e-05	4.45255e-05		K06233//low density lipoprotein-related protein 2+ko04918//Thyroid hormone synthesis+ko04340//Hedgehog signaling pathway+ko04979//Cholesterol metabolism;K20053//very low-density lipoprotein receptor;K20053//very low-density lipoprotein receptor;K20053//very low-density lipoprotein receptor;K20053//very low-density lipoprotein receptor		PREDICTED: vitellogenin receptor [Dufourea novaeangliae]	Low-density lipoprotein receptor domain class A	[T] KOG1215 Low-density lipoprotein receptors containing Ca2+-binding EGF-like domains	Very low-density lipoprotein receptor OS=Gallus gallus GN=VLDLR PE=1 SV=1
CL1349.Contig3_All	0.046	0.163	1.74305	1.3629e-08	1.45786e-08		K06233//low density lipoprotein-related protein 2+ko04918//Thyroid hormone synthesis+ko04340//Hedgehog signaling pathway+ko04979//Cholesterol metabolism;K20053//very low-density lipoprotein receptor;K20053//very low-density lipoprotein receptor;K20053//very low-density lipoprotein receptor;K20053//very low-density lipoprotein receptor		PREDICTED: vitellogenin receptor [Dufourea novaeangliae]	Low-density lipoprotein receptor domain class A	[T] KOG1215 Low-density lipoprotein receptors containing Ca2+-binding EGF-like domains	Very low-density lipoprotein receptor OS=Rattus norvegicus GN=Vldlr PE=2 SV=1
CL1359.Contig3_All	0.12	0.4	1.73997	9.23149e-05	0.000132512
CL1369.Contig3_All	0.03	0.483	4.06015	2.45952e-37	1.03541e-37		K05110//Eph receptor B1 [EC:2.7.10.1]+ko04360//Axon guidance;K05110//Eph receptor B1 [EC:2.7.10.1]+ko04360//Axon guidance;K05110//Eph receptor B1 [EC:2.7.10.1]+ko04360//Axon guidance;K05110//Eph receptor B1 [EC:2.7.10.1]+ko04360//Axon guidance;K05110//Eph receptor B1 [EC:2.7.10.1]+ko04360//Axon guidance	XM_014420739.1 PREDICTED: Halyomorpha halys ephrin type-B receptor 1-B (LOC106680795), transcript variant X2, mRNA	ephrin type-B receptor 2 isoform X3 [Zootermopsis nevadensis]	Protein tyrosine kinase	[T] KOG0196 Tyrosine kinase, EPH (ephrin) receptor family	Ephrin type-A receptor 4-A OS=Xenopus laevis GN=epha4-a PE=2 SV=1
CL137.Contig7_All	0	0.223	7.40319	5.08937e-20	3.32524e-20		K08794//calcium/calmodulin-dependent protein kinase I [EC:2.7.11.17]+ko04020//Calcium signaling pathway+ko05214//Glioma+ko04921//Oxytocin signaling pathway+ko04925//Aldosterone synthesis and secretion;K08794//calcium/calmodulin-dependent protein kinase I [EC:2.7.11.17]+ko04020//Calcium signaling pathway+ko05214//Glioma+ko04921//Oxytocin signaling pathway+ko04925//Aldosterone synthesis and secreti…	XM_017898770.1 PREDICTED: Eufriesea mexicana calcium/calmodulin-dependent protein kinase type 1 (LOC108546589), transcript variant X2, mRNA	PREDICTED: calcium/calmodulin-dependent protein kinase type 1 isoform X1 [Camponotus floridanus] >EFN68443.1 Calcium/calmodulin-dependent protein kinase type 1D [Camponotus floridanus]	Protein kinase domain	[T] KOG0032 Ca2+/calmodulin-dependent protein kinase, EF-Hand protein superfamily	Calcium/calmodulin-dependent protein kinase type 1 OS=Macrobrachium nipponense GN=CaMKI PE=2 SV=1	GO:0004674//protein serine/threonine kinase activity;GO:0005524//ATP binding
CL1370.Contig5_All	0	0.673	7.69882	1.17222e-23	6.84605e-24		K01049//acetylcholinesterase [EC:3.1.1.7]+ko04725//Cholinergic synapse+ko00564//Glycerophospholipid metabolism;K03927//carboxylesterase 2 [EC:3.1.1.1 3.1.1.84 3.1.1.56]+ko00983//Drug metabolism - other enzymes;K03927//carboxylesterase 2 [EC:3.1.1.1 3.1.1.84 3.1.1.56]+ko00983//Drug metabolism - other enzymes;K01049//acetylcholinesterase [EC:3.1.1.7]+ko04725//Cholinergic synapse+ko00564//Glyceropho…		PREDICTED: uncharacterized protein LOC107163695 [Diuraphis noxia]	Carboxylesterase family	[R] KOG1516 Carboxylesterase and related proteins	Esterase E4 OS=Myzus persicae PE=1 SV=1
CL1370.Contig7_All	0.523	1.753	1.751	1.05514e-27	5.52456e-28		K01049//acetylcholinesterase [EC:3.1.1.7]+ko04725//Cholinergic synapse+ko00564//Glycerophospholipid metabolism;K01049//acetylcholinesterase [EC:3.1.1.7]+ko04725//Cholinergic synapse+ko00564//Glycerophospholipid metabolism;K03927//carboxylesterase 2 [EC:3.1.1.1 3.1.1.84 3.1.1.56]+ko00983//Drug metabolism - other enzymes;K03927//carboxylesterase 2 [EC:3.1.1.1 3.1.1.84 3.1.1.56]+ko00983//Drug metabo…		PREDICTED: uncharacterized protein LOC100167473 [Acyrthosiphon pisum]	Carboxylesterase family	[R] KOG1516 Carboxylesterase and related proteins	Esterase E4 OS=Myzus persicae PE=1 SV=1
CL1372.Contig1_All	2.93	11.753	1.99642	0	0	zf-C2H2	K09228//KRAB domain-containing zinc finger protein;K09228//KRAB domain-containing zinc finger protein;K09228//KRAB domain-containing zinc finger protein;K09228//KRAB domain-containing zinc finger protein;K09228//KRAB domain-containing zinc finger protein	XM_021223395.1 PREDICTED: Mesocricetus auratus zinc finger protein 184 (Znf184), transcript variant X6, mRNA	PREDICTED: LOW QUALITY PROTEIN: oocyte zinc finger protein XlCOF6-like [Sinocyclocheilus grahami]	Zinc finger, C2H2 type	[R] KOG1721 FOG: Zn-finger	Zinc finger protein 782 OS=Homo sapiens GN=ZNF782 PE=2 SV=1
CL1372.Contig2_All	1.173	3.616	1.63606	1.82964e-93	3.53002e-94	bHLH	K09090//hairy and enhancer of split, invertebrate;K09090//hairy and enhancer of split, invertebrate;K09090//hairy and enhancer of split, invertebrate;K09090//hairy and enhancer of split, invertebrate;K09090//hairy and enhancer of split, invertebrate	XM_007906908.1 PREDICTED: Callorhinchus milii transcription factor HES-4-like (LOC103187419), transcript variant X2, mRNA	PREDICTED: protein hairy [Megachile rotundata]	Helix-loop-helix DNA-binding domain	[K] KOG4304 Transcriptional repressors of the hairy/E(spl) family (contains HLH)	Transcription factor HES-1 OS=Rattus norvegicus GN=Hes1 PE=1 SV=1
CL1373.Contig3_All	0.633	1.313	1.06126	6.23098e-09	6.53509e-09		K02259//cytochrome c oxidase assembly protein subunit 15+ko00860//Porphyrin and chlorophyll metabolism+ko04714//Thermogenesis+ko00190//Oxidative phosphorylation+ko01100//Metabolic pathways;K02259//cytochrome c oxidase assembly protein subunit 15+ko00860//Porphyrin and chlorophyll metabolism+ko04714//Thermogenesis+ko00190//Oxidative phosphorylation+ko01100//Metabolic pathways;K02259//cytochrome c …	BX649466.19 Zebrafish DNA sequence from clone DKEY-31C8 in linkage group 12, complete sequence	cytochrome c oxidase assembly protein COX15 homolog [Nilaparvata lugens]	Cytochrome oxidase assembly protein	[O] KOG2725 Cytochrome oxidase assembly factor COX15	Cytochrome c oxidase assembly protein COX15 homolog OS=Mus musculus GN=Cox15 PE=1 SV=1	GO:0016627//oxidoreductase activity, acting on the CH-CH group of donors;GO:0006784//heme a biosynthetic process;GO:0016021//integral component of membrane
CL1374.Contig3_All	0.02	0.273	3.78312	4.61936e-08	5.1059e-08			CP020682.1 Oryzias latipes strain Hd-rR chromosome 18 sequence		Protein of unknown function (DUF4064)
CL1378.Contig3_All	2.096	9.886	2.23387	3.90848e-201	3.57711e-202		K13356//alcohol-forming fatty acyl-CoA reductase [EC:1.2.1.84]+ko04146//Peroxisome+ko04212//Longevity regulating pathway - worm+ko00073//Cutin, suberine and wax biosynthesis		fatty acyl-CoA reductase [Ericerus pela]	Male sterility protein	[I] KOG1221 Acyl-CoA reductase	Fatty acyl-CoA reductase 1 OS=Rattus norvegicus GN=Far1 PE=2 SV=1	GO:0080019//fatty-acyl-CoA reductase (alcohol-forming) activity;GO:0016021//integral component of membrane;GO:0102965//alcohol-forming fatty acyl-CoA reductase activity;GO:0006629//lipid metabolic process
CL138.Contig1_All	0.683	1.516	1.13328	2.81985e-19	1.89114e-19		K12812//ATP-dependent RNA helicase UAP56/SUB2 [EC:3.6.4.13]+ko03040//Spliceosome+ko03013//RNA transport+ko03015//mRNA surveillance pathway+ko05164//Influenza A;K12812//ATP-dependent RNA helicase UAP56/SUB2 [EC:3.6.4.13]+ko03040//Spliceosome+ko03013//RNA transport+ko03015//mRNA surveillance pathway+ko05164//Influenza A;K12812//ATP-dependent RNA helicase UAP56/SUB2 [EC:3.6.4.13]+ko03040//Spliceosom…	XM_015933633.1 PREDICTED: Tetranychus urticae spliceosome RNA helicase DDX39B-like (LOC107366055), mRNA	PREDICTED: ATP-dependent RNA helicase WM6 [Bemisia tabaci] >XP_018914289.1 PREDICTED: ATP-dependent RNA helicase WM6 [Bemisia tabaci] >XP_018914290.1 PREDICTED: ATP-dependent RNA helicase WM6 [Bemisia tabaci] >XP_018914291.1 PREDICTED: ATP-dependent RNA helicase WM6 [Bemisia tabaci]	DEAD/DEAH box helicase	[A] KOG0329 ATP-dependent RNA helicase	ATP-dependent RNA helicase WM6 OS=Drosophila melanogaster GN=Hel25E PE=1 SV=1
CL1381.Contig1_All	0.716	2.24	1.65115	5.06333e-77	1.17777e-77		K17307//fibulin 1/2;K17307//fibulin 1/2;K17307//fibulin 1/2;K17307//fibulin 1/2		PREDICTED: fibulin-1-like [Bemisia tabaci]	Calcium-binding EGF domain	[T] KOG1217 Fibrillins and related proteins containing Ca2+-binding EGF-like domains	Fibrillin-3 OS=Homo sapiens GN=FBN3 PE=2 SV=3
CL1388.Contig1_All	0.153	5.16	5.078	2.74737e-195	2.58612e-196				PREDICTED: CKLF-like MARVEL transmembrane domain-containing protein 8 [Tribolium castaneum] >EFA04436.1 hypothetical protein TcasGA2_TC014737 [Tribolium castaneum]	Vibrio cholerae sialidase, lectin insertion			GO:0016021//integral component of membrane
CL139.Contig8_All	0.413	1.173	1.51623	1.10066e-07	1.24985e-07
CL1391.Contig4_All	0	0.103	5.05617	2.08914e-05	2.82306e-05		K03650//tRNA modification GTPase [EC:3.6.-.-];K03650//tRNA modification GTPase [EC:3.6.-.-];K03650//tRNA modification GTPase [EC:3.6.-.-];K03650//tRNA modification GTPase [EC:3.6.-.-]		tRNA modification GTPase GTPBP3, mitochondrial [Myzus persicae] >XP_022180669.1 tRNA modification GTPase GTPBP3, mitochondrial [Myzus persicae]	GTP-binding protein TrmE N-terminus	[J] KOG1191 Mitochondrial GTPase	tRNA modification GTPase GTPBP3, mitochondrial OS=Danio rerio GN=gtpbp3 PE=2 SV=1	GO:0006400//tRNA modification;GO:0005622//intracellular;GO:0005525//GTP binding;GO:0003924//GTPase activity
CL14.Contig15_All	0.33	1.463	2.15481	1.5746e-37	6.61335e-38
CL1402.Contig3_All	0.006	0.34	5.69694	3.24123e-26	1.76436e-26	HMG	K00476//aspartate beta-hydroxylase [EC:1.14.11.16];K00476//aspartate beta-hydroxylase [EC:1.14.11.16];K00476//aspartate beta-hydroxylase [EC:1.14.11.16];K00476//aspartate beta-hydroxylase [EC:1.14.11.16];K00476//aspartate beta-hydroxylase [EC:1.14.11.16]	CP023338.1 Drosophila melanogaster strain rover (forR) chromosome 2R	PREDICTED: aspartyl/asparaginyl beta-hydroxylase isoform X1 [Tribolium castaneum] >EFA13688.2 Aspartyl/asparaginyl beta-hydroxylase-like Protein [Tribolium castaneum]	Aspartyl/Asparaginyl beta-hydroxylase	[O] KOG3696 Aspartyl beta-hydroxylase	Aspartyl/asparaginyl beta-hydroxylase OS=Homo sapiens GN=ASPH PE=1 SV=3	GO:0018193//peptidyl-amino acid modification;GO:0016021//integral component of membrane
CL1410.Contig1_All	0.15	0.523	1.78593	0.000200447	0.000297669
CL1410.Contig3_All	2.643	5.5	1.05178	7.75031e-82	1.71181e-82			AK382333.1 Bombyx mori mRNA, clone: fdpe13O03	hypothetical protein TRFO_38435 [Tritrichomonas foetus]
CL1410.Contig4_All	3.266	7.56	1.21182	5.16116e-26	2.82854e-26
CL1413.Contig3_All	3.076	7.23	1.25246	1.37798e-128	1.96812e-129	CSD	K12841//calcium homeostasis endoplasmic reticulum protein+ko03040//Spliceosome;K12841//calcium homeostasis endoplasmic reticulum protein+ko03040//Spliceosome;K12841//calcium homeostasis endoplasmic reticulum protein+ko03040//Spliceosome;K12841//calcium homeostasis endoplasmic reticulum protein+ko03040//Spliceosome;K12841//calcium homeostasis endoplasmic reticulum protein+ko03040//Spliceosome		PREDICTED: calcium homeostasis endoplasmic reticulum protein isoform X2 [Anoplophora glabripennis]	RNA polymerase II-binding domain.	[A] KOG1869 Splicing coactivator SRm160/300, subunit SRm300	Calcium homeostasis endoplasmic reticulum protein OS=Homo sapiens GN=CHERP PE=1 SV=3
CL1420.Contig10_All	0.043	3.24	6.18331	9.03675e-302	5.4417e-303		K04439//beta-arrestin+ko04144//Endocytosis+ko05032//Morphine addiction+ko04340//Hedgehog signaling pathway+ko04010//MAPK signaling pathway+ko04062//Chemokine signaling pathway+ko04740//Olfactory transduction+ko04926//Relaxin signaling pathway+ko04928//Parathyroid hormone synthesis, secretion and action;K04439//beta-arrestin+ko04144//Endocytosis+ko05032//Morphine addiction+ko04340//Hedgehog signal…	XM_022263026.1 PREDICTED: Pieris rapae beta-arrestin-1 (LOC110995731), transcript variant X2, mRNA	beta-arrestin-1 isoform X2 [Nilaparvata lugens]	Arrestin (or S-antigen), N-terminal domain	[T] KOG3865 Arrestin	Beta-arrestin arr-1 OS=Caenorhabditis elegans GN=arr-1 PE=1 SV=2	GO:0007165//signal transduction
CL1420.Contig17_All	0.256	0.736	1.55132	1.90485e-11	1.74708e-11		K04439//beta-arrestin+ko04144//Endocytosis+ko05032//Morphine addiction+ko04340//Hedgehog signaling pathway+ko04010//MAPK signaling pathway+ko04062//Chemokine signaling pathway+ko04740//Olfactory transduction+ko04926//Relaxin signaling pathway+ko04928//Parathyroid hormone synthesis, secretion and action;K04439//beta-arrestin+ko04144//Endocytosis+ko05032//Morphine addiction+ko04340//Hedgehog signal…	XM_022263026.1 PREDICTED: Pieris rapae beta-arrestin-1 (LOC110995731), transcript variant X2, mRNA	beta-arrestin-1 isoform X2 [Nilaparvata lugens]	Arrestin (or S-antigen), N-terminal domain	[T] KOG3865 Arrestin	Beta-arrestin arr-1 OS=Caenorhabditis elegans GN=arr-1 PE=1 SV=2	GO:0007165//signal transduction
CL1420.Contig5_All	0.066	1.886	4.85388	1.32589e-171	1.42821e-172		K04439//beta-arrestin+ko04144//Endocytosis+ko05032//Morphine addiction+ko04340//Hedgehog signaling pathway+ko04010//MAPK signaling pathway+ko04062//Chemokine signaling pathway+ko04740//Olfactory transduction+ko04926//Relaxin signaling pathway+ko04928//Parathyroid hormone synthesis, secretion and action;K04439//beta-arrestin+ko04144//Endocytosis+ko05032//Morphine addiction+ko04340//Hedgehog signal…	XM_022263026.1 PREDICTED: Pieris rapae beta-arrestin-1 (LOC110995731), transcript variant X2, mRNA	beta-arrestin-1 isoform X2 [Nilaparvata lugens]	Arrestin (or S-antigen), N-terminal domain	[T] KOG3865 Arrestin	Beta-arrestin arr-1 OS=Caenorhabditis elegans GN=arr-1 PE=1 SV=2	GO:0007165//signal transduction
CL1420.Contig7_All	0	0.113	6.44351	1.26257e-11	1.14949e-11		K04439//beta-arrestin+ko04144//Endocytosis+ko05032//Morphine addiction+ko04340//Hedgehog signaling pathway+ko04010//MAPK signaling pathway+ko04062//Chemokine signaling pathway+ko04740//Olfactory transduction+ko04926//Relaxin signaling pathway+ko04928//Parathyroid hormone synthesis, secretion and action;K04439//beta-arrestin+ko04144//Endocytosis+ko05032//Morphine addiction+ko04340//Hedgehog signal…	XM_022263026.1 PREDICTED: Pieris rapae beta-arrestin-1 (LOC110995731), transcript variant X2, mRNA	beta-arrestin-1 isoform X2 [Nilaparvata lugens]	Arrestin (or S-antigen), N-terminal domain	[T] KOG3865 Arrestin	Beta-arrestin arr-1 OS=Caenorhabditis elegans GN=arr-1 PE=1 SV=2	GO:0007165//signal transduction
CL1421.Contig2_All	0	0.106	4.44621	0.00059005	0.000923622		K10413//dynein heavy chain 1, cytosolic+ko04145//Phagosome+ko05132//Salmonella infection+ko04962//Vasopressin-regulated water reabsorption;K10413//dynein heavy chain 1, cytosolic+ko04145//Phagosome+ko05132//Salmonella infection+ko04962//Vasopressin-regulated water reabsorption;K10413//dynein heavy chain 1, cytosolic+ko04145//Phagosome+ko05132//Salmonella infection+ko04962//Vasopressin-regulated w…		PREDICTED: dynein heavy chain, cytoplasmic isoform X3 [Acyrthosiphon pisum]		[Z] KOG3595 Dyneins, heavy chain	Cytoplasmic dynein 1 heavy chain 1 OS=Homo sapiens GN=DYNC1H1 PE=1 SV=5	GO:0007018//microtubule-based movement;GO:0005524//ATP binding;GO:0030286//dynein complex;GO:0003777//microtubule motor activity;GO:0016887//ATPase activity
CL1421.Contig5_All	0.57	1.183	1.06069	3.43019e-33	1.58087e-33		K10413//dynein heavy chain 1, cytosolic+ko04145//Phagosome+ko05132//Salmonella infection+ko04962//Vasopressin-regulated water reabsorption;K10413//dynein heavy chain 1, cytosolic+ko04145//Phagosome+ko05132//Salmonella infection+ko04962//Vasopressin-regulated water reabsorption;K10413//dynein heavy chain 1, cytosolic+ko04145//Phagosome+ko05132//Salmonella infection+ko04962//Vasopressin-regulated w…	XM_018934442.1 PREDICTED: Bactrocera latifrons dynein heavy chain, cytoplasmic (LOC108969617), transcript variant X8, mRNA	PREDICTED: dynein heavy chain, cytoplasmic [Bemisia tabaci]	Dynein heavy chain and region D6 of dynein motor	[Z] KOG3595 Dyneins, heavy chain	Dynein heavy chain, cytoplasmic OS=Drosophila melanogaster GN=Dhc64C PE=2 SV=2
CL1423.Contig3_All	4.31	13.88	1.68895	0	0		K00889//1-phosphatidylinositol-4-phosphate 5-kinase [EC:2.7.1.68]+ko04144//Endocytosis+ko04810//Regulation of actin cytoskeleton+ko04070//Phosphatidylinositol signaling system+ko04072//Phospholipase D signaling pathway+ko04666//Fc gamma R-mediated phagocytosis+ko00562//Inositol phosphate metabolism+ko05231//Choline metabolism in cancer+ko01100//Metabolic pathways;K00889//1-phosphatidylinositol-4-…	XM_017909861.1 PREDICTED: Eufriesea mexicana phosphatidylinositol 4-phosphate 5-kinase type-1 alpha (LOC108554551), partial mRNA	PREDICTED: phosphatidylinositol 4-phosphate 5-kinase type-1 alpha isoform X9 [Bemisia tabaci]	Phosphatidylinositol-4-phosphate 5-Kinase	[T] KOG0229 Phosphatidylinositol-4-phosphate 5-kinase	Phosphatidylinositol 4-phosphate 5-kinase type-1 gamma OS=Homo sapiens GN=PIP5K1C PE=1 SV=2
CL1428.Contig2_All	0.82	1.686	1.035	2.12115e-27	1.11868e-27	ZBTB	K09237//tramtrack+ko04013//MAPK signaling pathway - fly;K09237//tramtrack+ko04013//MAPK signaling pathway - fly;K09237//tramtrack+ko04013//MAPK signaling pathway - fly;K09237//tramtrack+ko04013//MAPK signaling pathway - fly;K09237//tramtrack+ko04013//MAPK signaling pathway - fly	NM_001113924.1 Xenopus tropicalis coiled-coil domain containing 59 (ccdc59), mRNA >BC157336.1 Xenopus tropicalis hypothetical protein LOC100135227, mRNA (cDNA clone MGC:147839 IMAGE:7543865), complete cds	PREDICTED: protein tramtrack, beta isoform-like [Diaphorina citri]	BTB/POZ domain	[PT] KOG3599 Ca2+-modulated nonselective cation channel polycystin	Sex determination protein fruitless OS=Drosophila melanogaster GN=fru PE=1 SV=1
CL1428.Contig5_All	1.383	2.883	1.047	3.24317e-61	9.07736e-62	ZBTB	K09237//tramtrack+ko04013//MAPK signaling pathway - fly;K09237//tramtrack+ko04013//MAPK signaling pathway - fly;K09237//tramtrack+ko04013//MAPK signaling pathway - fly;K09237//tramtrack+ko04013//MAPK signaling pathway - fly;K09237//tramtrack+ko04013//MAPK signaling pathway - fly		Myoneurin-like Protein [Tribolium castaneum]	BTB/POZ domain	[PT] KOG3599 Ca2+-modulated nonselective cation channel polycystin	Sex determination protein fruitless OS=Drosophila melanogaster GN=fru PE=1 SV=1
CL143.Contig8_All	0.83	2.73	1.71446	1.24554e-51	4.07916e-52	TF_bZIP	K20478//golgin subfamily B member 1;K09291//nucleoprotein TPR+ko05216//Thyroid cancer+ko03013//RNA transport+ko05200//Pathways in cancer;K20283//golgin subfamily A member 4;K20283//golgin subfamily A member 4;K20478//golgin subfamily B member 1		hypothetical protein [Paramecium tetraurelia strain d4-2] >CAK65402.1 unnamed protein product (macronuclear) [Paramecium tetraurelia]	Phage integrase, N-terminal SAM-like domain	[S] KOG4674 Uncharacterized conserved coiled-coil protein	Reticulocyte-binding protein 2 homolog a OS=Plasmodium falciparum (isolate 3D7) GN=PF13_0198 PE=1 SV=1	GO:0043130//ubiquitin binding
CL1456.Contig15_All	0.003	0.36	7.26652	1.76689e-14	1.4187e-14					PBP/GOBP family
CL1456.Contig7_All	0	0.17	5.75074	6.97246e-08	7.80234e-08				odorant-binding protein [Phenacoccus solenopsis]	Predicted coiled-coil protein (DUF2205)			GO:0005549//odorant binding
CL1457.Contig10_All	53.286	274.056	2.35958	0	0		K15376//gephyrin [EC:2.10.1.1 2.7.7.75]+ko04727//GABAergic synapse+ko01100//Metabolic pathways+ko00790//Folate biosynthesis		PREDICTED: regulator of microtubule dynamics protein 1-like isoform X3 [Bemisia tabaci]	Tetratricopeptide repeat		Regulator of microtubule dynamics protein 1 OS=Bos taurus GN=RMDN1 PE=2 SV=1
CL1457.Contig1_All	1.823	3.67	1.03072	3.3646e-19	2.26343e-19		K15376//gephyrin [EC:2.10.1.1 2.7.7.75]+ko04727//GABAergic synapse+ko01100//Metabolic pathways+ko00790//Folate biosynthesis		PREDICTED: regulator of microtubule dynamics protein 1-like isoform X3 [Bemisia tabaci]	Tetratricopeptide repeat		Regulator of microtubule dynamics protein 1 OS=Bos taurus GN=RMDN1 PE=2 SV=1
CL1457.Contig2_All	9.88	24.006	1.27941	2.08703e-136	2.84471e-137		K15376//gephyrin [EC:2.10.1.1 2.7.7.75]+ko04727//GABAergic synapse+ko01100//Metabolic pathways+ko00790//Folate biosynthesis		PREDICTED: regulator of microtubule dynamics protein 1-like isoform X3 [Bemisia tabaci]	Tetratricopeptide repeat		Regulator of microtubule dynamics protein 1 OS=Bos taurus GN=RMDN1 PE=2 SV=1
CL1457.Contig4_All	0.256	1.083	2.10043	2.11396e-09	2.15693e-09				PREDICTED: regulator of microtubule dynamics protein 1-like [Diuraphis noxia]	Guanylate-kinase-associated protein (GKAP) protein			GO:0016021//integral component of membrane
CL1459.Contig4_All	0.656	2.48	1.92795	7.95115e-39	3.25738e-39	HMG	K11294//nucleolin+ko05130//Pathogenic Escherichia coli infection;K11804//WD repeat-containing protein 42A;K07200//5'-AMP-activated protein kinase, regulatory gamma subunit+ko05410//Hypertrophic cardiomyopathy (HCM)+ko04211//Longevity regulating pathway+ko04213//Longevity regulating pathway - multiple species+ko04910//Insulin signaling pathway+ko04714//Thermogenesis+ko04710//Circadian rhythm+ko045…		PREDICTED: LOW QUALITY PROTEIN: uncharacterized protein DDB_G0271670-like, partial [Zonotrichia albicollis]	gag-polypeptide of LTR copia-type	[O] KOG3696 Aspartyl beta-hydroxylase	Transcription initiation factor TFIID subunit 3 OS=Xenopus laevis GN=taf3 PE=2 SV=1
CL146.Contig2_All	17.63	183.18	3.38457	0	0
CL146.Contig3_All	18.356	151.263	3.04713	0	0
CL146.Contig4_All	38.806	415.693	3.42697	0	0
CL146.Contig5_All	18.723	199.656	3.42311	0	0
CL1460.Contig12_All	0	0.34	8.11832	6.00157e-30	2.97861e-30	HSF	K17498//transcription factor SPN1;K15176//RNA polymerase-associated protein CTR9;K15176//RNA polymerase-associated protein CTR9;K15176//RNA polymerase-associated protein CTR9;K15176//RNA polymerase-associated protein CTR9	AP002496.3 Homo sapiens genomic DNA, chromosome 11q, clone:CTD-2378D21, complete sequence	dentin sialophosphoprotein-like [Nilaparvata lugens]	Arginine/serine-rich protein PNISR	[A] KOG1869 Splicing coactivator SRm160/300, subunit SRm300	Vitellogenin-2 OS=Gallus gallus GN=VTG2 PE=1 SV=1
CL1460.Contig16_All	0	0.2	7.41463	3.77697e-20	2.45503e-20	HSF	K17498//transcription factor SPN1;K15176//RNA polymerase-associated protein CTR9;K15176//RNA polymerase-associated protein CTR9;K15176//RNA polymerase-associated protein CTR9;K15176//RNA polymerase-associated protein CTR9	AP002496.3 Homo sapiens genomic DNA, chromosome 11q, clone:CTD-2378D21, complete sequence	dentin sialophosphoprotein-like [Nilaparvata lugens]	Arginine/serine-rich protein PNISR	[A] KOG1869 Splicing coactivator SRm160/300, subunit SRm300	Vitellogenin-2 OS=Gallus gallus GN=VTG2 PE=1 SV=1
CL1460.Contig24_All	0.006	0.386	5.79318	6.07331e-29	3.08287e-29	HSF	K13170//splicing factor, arginine/serine-rich 18;K13170//splicing factor, arginine/serine-rich 18;K13170//splicing factor, arginine/serine-rich 18;K13170//splicing factor, arginine/serine-rich 18;K13170//splicing factor, arginine/serine-rich 18		Sfrs18 protein, partial [Danio rerio]	Arginine/serine-rich protein PNISR	[A] KOG1869 Splicing coactivator SRm160/300, subunit SRm300	Dentin sialophosphoprotein OS=Homo sapiens GN=DSPP PE=1 SV=2
CL1460.Contig3_All	0.05	0.66	3.69144	8.61199e-48	2.99361e-48	HSF	K13170//splicing factor, arginine/serine-rich 18;K13170//splicing factor, arginine/serine-rich 18;K13170//splicing factor, arginine/serine-rich 18;K13170//splicing factor, arginine/serine-rich 18;K13170//splicing factor, arginine/serine-rich 18		PREDICTED: arginine/serine-rich protein PNISR isoform X1 [Lepisosteus oculatus] >XP_015211901.1 PREDICTED: arginine/serine-rich protein PNISR isoform X1 [Lepisosteus oculatus]	Arginine/serine-rich protein PNISR	[A] KOG1869 Splicing coactivator SRm160/300, subunit SRm300	Dentin sialophosphoprotein OS=Homo sapiens GN=DSPP PE=1 SV=2
CL1461.Contig3_All	0	2.94	8.88791	6.26967e-46	2.24891e-46
CL1461.Contig5_All	0	0.803	7.35184	1.90507e-19	1.26874e-19					Domain of unknown function (DUF3333)
CL1461.Contig6_All	0	0.313	6.10576	1.31091e-09	1.31846e-09					Domain of unknown function (DUF3333)
CL1464.Contig3_All	1.033	2.593	1.32655	1.27914e-21	7.91953e-22				odorant-binding protein [Phenacoccus solenopsis]
CL1469.Contig1_All	0	1.216	6.3742	3.53763e-11	3.28308e-11
CL147.Contig1_All	0	0.22	5.58273	3.47445e-07	4.08249e-07		K09228//KRAB domain-containing zinc finger protein;K03654//ATP-dependent DNA helicase RecQ [EC:3.6.4.12]+ko03018//RNA degradation;K18729//protein angel;K13355//nucleoside diphosphate-linked moiety X motif 19, mitochondrial [EC:3.6.1.-]+ko04146//Peroxisome;K02213//cell division control protein 6+ko04110//Cell cycle		PREDICTED: putative nuclease HARBI1 [Trachymyrmex zeteki]	DDE superfamily endonuclease	[L] KOG4585 Predicted transposase	Putative nuclease HARBI1 OS=Danio rerio GN=harbi1 PE=2 SV=1
CL1473.Contig3_All	7.516	15.503	1.03145	3.24834e-156	3.8627e-157	HMG	K13171//serine/arginine repetitive matrix protein 1+ko03013//RNA transport+ko03015//mRNA surveillance pathway;K13171//serine/arginine repetitive matrix protein 1+ko03013//RNA transport+ko03015//mRNA surveillance pathway;K13171//serine/arginine repetitive matrix protein 1+ko03013//RNA transport+ko03015//mRNA surveillance pathway;K13171//serine/arginine repetitive matrix protein 1+ko03013//RNA tran…	XM_014358999.1 PREDICTED: Copidosoma floridanum serine/arginine repetitive matrix protein 1 (LOC106643743), mRNA	PREDICTED: serine/arginine repetitive matrix protein 1-like isoform X1 [Diuraphis noxia] >XP_015371353.1 PREDICTED: serine/arginine repetitive matrix protein 1-like isoform X1 [Diuraphis noxia] >XP_015371354.1 PREDICTED: serine/arginine repetitive matrix protein 1-like isoform X1 [Diuraphis noxia]	PWI domain	[K] KOG1874 KEKE-like motif-containing transcription regulator (Rlr1)/suppressor of sin4	Splicing regulatory glutamine/lysine-rich protein 1 OS=Homo sapiens GN=SREK1 PE=1 SV=1	GO:0006397//mRNA processing
CL1473.Contig4_All	0.49	1.426	1.53396	2.19164e-34	9.83382e-35	HMG	K13171//serine/arginine repetitive matrix protein 1+ko03013//RNA transport+ko03015//mRNA surveillance pathway;K13171//serine/arginine repetitive matrix protein 1+ko03013//RNA transport+ko03015//mRNA surveillance pathway;K13171//serine/arginine repetitive matrix protein 1+ko03013//RNA transport+ko03015//mRNA surveillance pathway;K13171//serine/arginine repetitive matrix protein 1+ko03013//RNA tran…	XM_014358999.1 PREDICTED: Copidosoma floridanum serine/arginine repetitive matrix protein 1 (LOC106643743), mRNA	PREDICTED: serine/arginine repetitive matrix protein 1-like isoform X1 [Diuraphis noxia] >XP_015371353.1 PREDICTED: serine/arginine repetitive matrix protein 1-like isoform X1 [Diuraphis noxia] >XP_015371354.1 PREDICTED: serine/arginine repetitive matrix protein 1-like isoform X1 [Diuraphis noxia]	PWI domain	[K] KOG1874 KEKE-like motif-containing transcription regulator (Rlr1)/suppressor of sin4	Splicing regulatory glutamine/lysine-rich protein 1 OS=Homo sapiens GN=SREK1 PE=1 SV=1	GO:0006397//mRNA processing
CL1481.Contig4_All	1.103	6.223	2.49525	0	0		K14684//solute carrier family 25 (mitochondrial phosphate transporter), member 23/24/25/41;K14684//solute carrier family 25 (mitochondrial phosphate transporter), member 23/24/25/41;K14684//solute carrier family 25 (mitochondrial phosphate transporter), member 23/24/25/41;K14684//solute carrier family 25 (mitochondrial phosphate transporter), member 23/24/25/41	XM_005191009.3 PREDICTED: Musca domestica 6-phosphogluconolactonase (LOC101900811), partial mRNA	PREDICTED: calcium-binding mitochondrial carrier protein SCaMC-1-B [Bemisia tabaci]	Mitochondrial carrier protein	[F] KOG0036 Predicted mitochondrial carrier protein	Calcium-binding mitochondrial carrier protein SCaMC-3 OS=Mus musculus GN=Slc25a23 PE=1 SV=1
CL1482.Contig5_All	0.346	2.036	2.55531	7.72516e-88	1.58954e-88		K02154//V-type H+-transporting ATPase subunit a+ko04145//Phagosome+ko04142//Lysosome+ko04721//Synaptic vesicle cycle+ko05323//Rheumatoid arthritis+ko00190//Oxidative phosphorylation+ko05110//Vibrio cholerae infection+ko05120//Epithelial cell signaling in Helicobacter pylori infection+ko05152//Tuberculosis+ko04966//Collecting duct acid secretion+ko01100//Metabolic pathways+ko05165//Human papilloma…	XM_012427911.1 PREDICTED: Orussus abietinus V-type proton ATPase 116 kDa subunit a isoform 1 (LOC105701283), transcript variant X5, mRNA	V-type proton ATPase 116 kDa subunit a isoform X1 [Myzus persicae]	V-type ATPase 116kDa subunit family	[C] KOG2189 Vacuolar H+-ATPase V0 sector, subunit a	V-type proton ATPase 116 kDa subunit a isoform 1 OS=Bos taurus GN=ATP6V0A1 PE=2 SV=1
CL1493.Contig2_All	0.506	1.993	1.98584	3.03679e-05	4.15809e-05
CL1494.Contig1_All	0	0.27	7.15411	2.18249e-17	1.56523e-17		K18622//adducin	XM_015985020.1 PREDICTED: Tribolium castaneum hypothetical protein (LOC657396), transcript variant X6, mRNA	PREDICTED: uncharacterized protein LOC109038185 isoform X1 [Bemisia tabaci] >XP_018908707.1 PREDICTED: uncharacterized protein LOC109038185 isoform X1 [Bemisia tabaci]	Phosphorylase superfamily
CL1494.Contig4_All	0	0.056	4.93818	4.42622e-05	6.15437e-05		K18622//adducin	XM_015985020.1 PREDICTED: Tribolium castaneum hypothetical protein (LOC657396), transcript variant X6, mRNA	PREDICTED: uncharacterized protein LOC109038185 isoform X1 [Bemisia tabaci] >XP_018908707.1 PREDICTED: uncharacterized protein LOC109038185 isoform X1 [Bemisia tabaci]	IclR helix-turn-helix domain
CL1499.Contig4_All	0	0.076	5.40719	1.58007e-06	1.94727e-06	zf-C2H2	K16669//protocadherin Fat 4+ko04391//Hippo signaling pathway - fly+ko04392//Hippo signaling pathway - multiple species;K10955//mucin-2+ko05226//Gastric cancer+ko05146//Amoebiasis;K17582//antigen KI-67;K10955//mucin-2+ko05226//Gastric cancer+ko05146//Amoebiasis;K22016//mucin-3/17		AGAP008244-PA [Anopheles gambiae str. PEST] >EAL39610.3 AGAP008244-PA [Anopheles gambiae str. PEST]	Protein of unknown function (DUF1455)	[Y] KOG2992 Nucleolar GTPase/ATPase p130	Serine-rich 25 kDa antigen protein OS=Entamoeba histolytica PE=1 SV=1	GO:0031012//extracellular matrix;GO:0005201//extracellular matrix structural constituent;GO:0008061//chitin binding;GO:0006030//chitin metabolic process;GO:0005576//extracellular region
CL15.Contig4_All	2.15	5.53	1.34056	6.97766e-115	1.11719e-115		K11252//histone H2B+ko05322//Systemic lupus erythematosus+ko05034//Alcoholism+ko05203//Viral carcinogenesis;K11252//histone H2B+ko05322//Systemic lupus erythematosus+ko05034//Alcoholism+ko05203//Viral carcinogenesis;K11252//histone H2B+ko05322//Systemic lupus erythematosus+ko05034//Alcoholism+ko05203//Viral carcinogenesis;K11252//histone H2B+ko05322//Systemic lupus erythematosus+ko05034//Alcoholi…	XM_015582457.1 PREDICTED: Dufourea novaeangliae histone H2B-like (LOC107193073), mRNA	PREDICTED: histone H2B-like [Cimex lectularius]	Core histone H2A/H2B/H3/H4	[B] KOG1744 Histone H2B	Histone H2B OS=Chironomus thummi thummi PE=3 SV=2
CL15.Contig5_All	0	1.61	10.1535	2.9012e-91	5.74565e-92		K11254//histone H4+ko05322//Systemic lupus erythematosus+ko05034//Alcoholism+ko05203//Viral carcinogenesis;K11254//histone H4+ko05322//Systemic lupus erythematosus+ko05034//Alcoholism+ko05203//Viral carcinogenesis;K11254//histone H4+ko05322//Systemic lupus erythematosus+ko05034//Alcoholism+ko05203//Viral carcinogenesis;K11254//histone H4+ko05322//Systemic lupus erythematosus+ko05034//Alcoholism+k…	XM_020075526.1 PREDICTED: Aedes albopictus uncharacterized LOC109397469 (LOC109397469), mRNA	PREDICTED: uncharacterized protein LOC103210983 [Orycteropus afer afer]	Zinc finger, C3HC4 type (RING finger)	[B] KOG3467 Histone H4	Histone H4 OS=Myrmica ruginodis GN=His4 PE=3 SV=2
CL1502.Contig2_All	10.22	20.51	1.00448	9.42836e-128	1.35379e-128		K01620//threonine aldolase [EC:4.1.2.48]+ko01230//Biosynthesis of amino acids+ko00260//Glycine, serine and threonine metabolism+ko01100//Metabolic pathways;K01620//threonine aldolase [EC:4.1.2.48]+ko01230//Biosynthesis of amino acids+ko00260//Glycine, serine and threonine metabolism+ko01100//Metabolic pathways;K01620//threonine aldolase [EC:4.1.2.48]+ko01230//Biosynthesis of amino acids+ko00260//…		PREDICTED: probable low-specificity L-threonine aldolase 2 [Bemisia tabaci]	Beta-eliminating lyase	[E] KOG1368 Threonine aldolase	Uncharacterized protein R102.4 OS=Caenorhabditis elegans GN=R102.4 PE=3 SV=3
CL1504.Contig3_All	0.426	1.506	1.81828	2.86594e-85	6.07455e-86		K10779//transcriptional regulator ATRX [EC:3.6.4.12];K02374//tyrosine-protein phosphatase non-receptor type 13+ko04210//Apoptosis;K10955//mucin-2+ko05226//Gastric cancer+ko05146//Amoebiasis	AC093113.4 Homo sapiens BAC clone RP11-789A18 from 2, complete sequence	PREDICTED: uncharacterized protein LOC106679633 [Halyomorpha halys]	PDZ domain (Also known as DHR or GLGF)	[S] KOG3528 FOG: PDZ domain	Periaxin OS=Bos taurus GN=PRX PE=1 SV=3
CL1506.Contig3_All	1.02	2.816	1.47985	1.99751e-18	1.37828e-18		K04565//superoxide dismutase, Cu-Zn family [EC:1.15.1.1]+ko05014//Amyotrophic lateral sclerosis (ALS)+ko04146//Peroxisome+ko04213//Longevity regulating pathway - multiple species+ko05020//Prion diseases+ko05016//Huntington disease;K04565//superoxide dismutase, Cu-Zn family [EC:1.15.1.1]+ko05014//Amyotrophic lateral sclerosis (ALS)+ko04146//Peroxisome+ko04213//Longevity regulating pathway - multip…		ACYPI003921 [Acyrthosiphon pisum]	Copper/zinc superoxide dismutase (SODC)	[P] KOG0441 Cu2+/Zn2+ superoxide dismutase SOD1	Superoxide dismutase [Cu-Zn] OS=Halocynthia roretzi PE=1 SV=2	GO:0004784//superoxide dismutase activity;GO:0046872//metal ion binding
CL151.Contig10_All	6.043	16.45	1.4481	0	0		K22016//mucin-3/17;K10955//mucin-2+ko05226//Gastric cancer+ko05146//Amoebiasis;K10955//mucin-2+ko05226//Gastric cancer+ko05146//Amoebiasis;K10955//mucin-2+ko05226//Gastric cancer+ko05146//Amoebiasis;K22016//mucin-3/17		uncharacterized protein, partial [Leishmania mexicana MHOM/GT/2001/U1103] >CBZ40949.1 unnamed protein product, partial [Leishmania mexicana MHOM/GT/2001/U1103]		[T] KOG1187 Serine/threonine protein kinase	Mucin-2 OS=Homo sapiens GN=MUC2 PE=1 SV=2	GO:0010468//regulation of gene expression;GO:0003682//chromatin binding;GO:0016021//integral component of membrane
CL151.Contig13_All	0	4.46	11.6424	3.82166e-199	3.53504e-200		K22016//mucin-3/17;K10955//mucin-2+ko05226//Gastric cancer+ko05146//Amoebiasis;K10955//mucin-2+ko05226//Gastric cancer+ko05146//Amoebiasis;K22016//mucin-3/17;K10955//mucin-2+ko05226//Gastric cancer+ko05146//Amoebiasis		PREDICTED: serine-rich adhesin for platelets [Tupaia chinensis]		[T] KOG1187 Serine/threonine protein kinase	Mucin-2 OS=Homo sapiens GN=MUC2 PE=1 SV=2	GO:0010468//regulation of gene expression;GO:0003682//chromatin binding;GO:0016021//integral component of membrane
CL151.Contig15_All	7.183	17.423	1.28316	0	0		K22016//mucin-3/17;K10955//mucin-2+ko05226//Gastric cancer+ko05146//Amoebiasis;K10955//mucin-2+ko05226//Gastric cancer+ko05146//Amoebiasis;K22016//mucin-3/17;K10955//mucin-2+ko05226//Gastric cancer+ko05146//Amoebiasis		PREDICTED: serine-rich adhesin for platelets [Tupaia chinensis]		[T] KOG1187 Serine/threonine protein kinase	Mucin-2 OS=Homo sapiens GN=MUC2 PE=1 SV=2	GO:0010468//regulation of gene expression;GO:0003682//chromatin binding;GO:0016021//integral component of membrane
CL151.Contig1_All	0	0.406	8.29897	3.93843e-33	1.81767e-33		K22016//mucin-3/17;K10955//mucin-2+ko05226//Gastric cancer+ko05146//Amoebiasis;K10955//mucin-2+ko05226//Gastric cancer+ko05146//Amoebiasis;K22016//mucin-3/17;K22016//mucin-3/17		uncharacterized protein, partial [Leishmania mexicana MHOM/GT/2001/U1103] >CBZ40949.1 unnamed protein product, partial [Leishmania mexicana MHOM/GT/2001/U1103]		[T] KOG1187 Serine/threonine protein kinase	Mucin-2 OS=Homo sapiens GN=MUC2 PE=1 SV=2	GO:0010468//regulation of gene expression;GO:0003682//chromatin binding;GO:0016021//integral component of membrane
CL151.Contig2_All	0	0.27	7.68028	2.06709e-23	1.21509e-23		K22016//mucin-3/17;K10955//mucin-2+ko05226//Gastric cancer+ko05146//Amoebiasis;K10955//mucin-2+ko05226//Gastric cancer+ko05146//Amoebiasis;K10955//mucin-2+ko05226//Gastric cancer+ko05146//Amoebiasis;K22016//mucin-3/17		PREDICTED: serine-rich adhesin for platelets [Tupaia chinensis]		[T] KOG1187 Serine/threonine protein kinase	Mucin-2 OS=Homo sapiens GN=MUC2 PE=1 SV=2	GO:0010468//regulation of gene expression;GO:0003682//chromatin binding;GO:0016021//integral component of membrane
CL1525.Contig1_All	0.34	1.573	2.23116	3.08699e-13	2.60918e-13		K14073//pancreatic triacylglycerol lipase [EC:3.1.1.3]+ko04975//Fat digestion and absorption+ko04977//Vitamin digestion and absorption+ko04972//Pancreatic secretion+ko00561//Glycerolipid metabolism+ko01100//Metabolic pathways;K14073//pancreatic triacylglycerol lipase [EC:3.1.1.3]+ko04975//Fat digestion and absorption+ko04977//Vitamin digestion and absorption+ko04972//Pancreatic secretion+ko00561/…		PREDICTED: uncharacterized protein LOC107166591 [Diuraphis noxia]				GO:0004806//triglyceride lipase activity;GO:0005576//extracellular region;GO:0006629//lipid metabolic process
CL1528.Contig4_All	0.336	0.976	1.53155	9.25156e-39	3.79817e-39		K08800//NUAK family, SNF1-like kinase [EC:2.7.11.1];K08800//NUAK family, SNF1-like kinase [EC:2.7.11.1];K08800//NUAK family, SNF1-like kinase [EC:2.7.11.1];K08800//NUAK family, SNF1-like kinase [EC:2.7.11.1];K08800//NUAK family, SNF1-like kinase [EC:2.7.11.1]		PREDICTED: probable serine/threonine-protein kinase MARK-A [Acyrthosiphon pisum] >XP_008184454.1 PREDICTED: probable serine/threonine-protein kinase MARK-A [Acyrthosiphon pisum]	Protein kinase domain	[R] KOG0586 Serine/threonine protein kinase	NUAK family SNF1-like kinase 2 OS=Homo sapiens GN=NUAK2 PE=1 SV=1	GO:0005524//ATP binding;GO:0004672//protein kinase activity
CL1533.Contig2_All	0.773	1.663	1.09052	1.54099e-24	8.77359e-25		K11294//nucleolin+ko05130//Pathogenic Escherichia coli infection;K11294//nucleolin+ko05130//Pathogenic Escherichia coli infection	LT594497.1 Plasmodium malariae genome assembly, chromosome: 9	PREDICTED: dentin sialophosphoprotein [Protobothrops mucrosquamatus]	Uncharacterized protein conserved in bacteria (DUF2094)			GO:0003723//RNA binding
CL1536.Contig3_All	0.926	2.01	1.10595	6.11512e-25	3.43777e-25		K05544//tRNA-dihydrouridine synthase 3 [EC:1.3.1.89];K05544//tRNA-dihydrouridine synthase 3 [EC:1.3.1.89];K05544//tRNA-dihydrouridine synthase 3 [EC:1.3.1.89];K05544//tRNA-dihydrouridine synthase 3 [EC:1.3.1.89];K05544//tRNA-dihydrouridine synthase 3 [EC:1.3.1.89]		PREDICTED: tRNA-dihydrouridine(47) synthase [NAD(P)(+)]-like [Bemisia tabaci]	Dihydrouridine synthase (Dus)	[R] KOG2333 Uncharacterized conserved protein	tRNA-dihydrouridine(47) synthase [NAD(P)(+)]-like OS=Xenopus laevis GN=dus3l PE=2 SV=1	GO:0046872//metal ion binding;GO:0017150//tRNA dihydrouridine synthase activity;GO:0050660//flavin adenine dinucleotide binding
CL1538.Contig2_All	0.63	1.276	1.03203	3.13723e-08	3.43902e-08
CL1544.Contig4_All	0.303	0.95	1.65038	8.0563e-15	6.38813e-15	Others		XM_013242889.1 PREDICTED: Stomoxys calcitrans cAMP-responsive element-binding protein-like 2 (LOC106081134), mRNA	PREDICTED: cAMP-responsive element-binding protein-like 2 [Bemisia tabaci]	PBP/GOBP family		cAMP-responsive element-binding protein-like 2 OS=Bos taurus GN=CREBL2 PE=1 SV=1	GO:0003700//DNA binding transcription factor activity
CL156.Contig4_All	3.89	10.62	1.45196	3.21559e-285	2.10062e-286		K06947//polynucleotide 5'-hydroxyl-kinase GRC3/NOL9 [EC:2.7.1.-];K06947//polynucleotide 5'-hydroxyl-kinase GRC3/NOL9 [EC:2.7.1.-];K06947//polynucleotide 5'-hydroxyl-kinase GRC3/NOL9 [EC:2.7.1.-];K06947//polynucleotide 5'-hydroxyl-kinase GRC3/NOL9 [EC:2.7.1.-];K06947//polynucleotide 5'-hydroxyl-kinase GRC3/NOL9 [EC:2.7.1.-]		polynucleotide 5'-hydroxyl-kinase NOL9 isoform X1 [Zootermopsis nevadensis] >KDR08998.1 Nucleolar protein 9 [Zootermopsis nevadensis]	mRNA cleavage and polyadenylation factor CLP1 P-loop	[R] KOG2750 Uncharacterized conserved protein similar to ATP/GTP-binding protein	Polynucleotide 5'-hydroxyl-kinase NOL9 OS=Bos taurus GN=NOL9 PE=3 SV=1	GO:0005524//ATP binding;GO:0016301//kinase activity
CL1569.Contig3_All	1.693	3.7	1.11503	4.60922e-87	9.57917e-88	TF_bZIP	K20283//golgin subfamily A member 4;K20283//golgin subfamily A member 4;K20283//golgin subfamily A member 4;K20283//golgin subfamily A member 4;K20283//golgin subfamily A member 4		PREDICTED: golgin subfamily A member 4 isoform X1 [Diachasma alloeum]	GRIP domain	[U] KOG0946 ER-Golgi vesicle-tethering protein p115	Interaptin OS=Dictyostelium discoideum GN=abpD PE=1 SV=1
CL157.Contig2_All	0.603	1.71	1.5148	1.25975e-07	1.43667e-07		K16502//cadherin-related family member 2;K09624//neurotrypsin [EC:3.4.21.-];K06560//mannose receptor, C type+ko04145//Phagosome+ko05152//Tuberculosis;K19895//GDNF family receptor alpha 1		hypothetical protein TcasGA2_TC031650 [Tribolium castaneum]	Integrase core domain	[R] KOG0017 FOG: Transposon-encoded proteins with TYA, reverse transcriptase, integrase domains in various combinations
CL1572.Contig4_All	0.766	1.793	1.22397	2.21201e-93	4.27254e-94	zf-C2H2	K12567//titin [EC:2.7.11.1]+ko05414//Dilated cardiomyopathy (DCM)+ko05410//Hypertrophic cardiomyopathy (HCM);K12567//titin [EC:2.7.11.1]+ko05414//Dilated cardiomyopathy (DCM)+ko05410//Hypertrophic cardiomyopathy (HCM);K12567//titin [EC:2.7.11.1]+ko05414//Dilated cardiomyopathy (DCM)+ko05410//Hypertrophic cardiomyopathy (HCM);K12567//titin [EC:2.7.11.1]+ko05414//Dilated cardiomyopathy (DCM)+ko0541…	AC182445.4 Mus musculus BAC clone RP24-498N22 from chromosome y, complete sequence	PREDICTED: titin isoform X3 [Anoplophora glabripennis]	Immunoglobulin I-set domain	[RP] KOG4475 FOG: Immunoglobin and related proteins	Titin homolog OS=Caenorhabditis elegans GN=ttn-1 PE=1 SV=2
CL1579.Contig6_All	0.97	2.393	1.29105	2.49405e-21	1.55878e-21	TF_bZIP	K17751//myosin heavy chain 6/7+ko05416//Viral myocarditis+ko04261//Adrenergic signaling in cardiomyocytes+ko04260//Cardiac muscle contraction;K20478//golgin subfamily B member 1;K10421//CAP-Gly domain-containing linker protein 1+ko04150//mTOR signaling pathway;K17751//myosin heavy chain 6/7+ko05416//Viral myocarditis+ko04261//Adrenergic signaling in cardiomyocytes+ko04260//Cardiac muscle contract…		Leucine-rich repeat flightless-interacting protein 2 [Zootermopsis nevadensis]	LRRFIP family	[R] KOG2010 Double stranded RNA binding protein	Leucine-rich repeat flightless-interacting protein 2 OS=Xenopus tropicalis GN=lrrfip2 PE=2 SV=1
CL1595.Contig1_All	1.076	2.306	1.09664	2.95205e-07	3.44941e-07
CL16.Contig7_All	0.006	0.116	3.76205	4.02119e-21	2.53248e-21		K16175//protein scribble+ko04391//Hippo signaling pathway - fly+ko04390//Hippo signaling pathway+ko04530//Tight junction+ko05203//Viral carcinogenesis+ko05165//Human papillomavirus infection;K16175//protein scribble+ko04391//Hippo signaling pathway - fly+ko04390//Hippo signaling pathway+ko04530//Tight junction+ko05203//Viral carcinogenesis+ko05165//Human papillomavirus infection;K16175//protein s…	XM_011196996.1 PREDICTED: Bactrocera cucurbitae protein lap4 (LOC105220499), transcript variant X10, mRNA	PREDICTED: protein lap4 isoform X8 [Cimex lectularius]	PDZ domain (Also known as DHR or GLGF)	[R] KOG0619 FOG: Leucine rich repeat	Protein lap4 OS=Drosophila melanogaster GN=scrib PE=1 SV=1
CL1609.Contig1_All	0.11	40.5	8.53891	0	0
CL1609.Contig2_All	1.38	3.726	1.4346	1.10142e-51	3.60115e-52
CL161.Contig2_All	0.316	6.46	4.33997	7.30236e-240	5.54821e-241		K00432//glutathione peroxidase [EC:1.11.1.9]+ko04918//Thyroid hormone synthesis+ko00590//Arachidonic acid metabolism+ko00480//Glutathione metabolism;K00432//glutathione peroxidase [EC:1.11.1.9]+ko04918//Thyroid hormone synthesis+ko00590//Arachidonic acid metabolism+ko00480//Glutathione metabolism;K00432//glutathione peroxidase [EC:1.11.1.9]+ko04918//Thyroid hormone synthesis+ko00590//Arachidonic …		probable phospholipid hydroperoxide glutathione peroxidase [Nilaparvata lugens]	Glutathione peroxidase	[O] KOG1651 Glutathione peroxidase	Glutathione peroxidase OS=Schistosoma mansoni GN=GPX1 PE=1 SV=2	GO:0006979//response to oxidative stress;GO:0004602//glutathione peroxidase activity
CL161.Contig4_All	3.8	10.163	1.41243	2.97108e-118	4.63425e-119		K00432//glutathione peroxidase [EC:1.11.1.9]+ko04918//Thyroid hormone synthesis+ko00590//Arachidonic acid metabolism+ko00480//Glutathione metabolism;K00432//glutathione peroxidase [EC:1.11.1.9]+ko04918//Thyroid hormone synthesis+ko00590//Arachidonic acid metabolism+ko00480//Glutathione metabolism;K00432//glutathione peroxidase [EC:1.11.1.9]+ko04918//Thyroid hormone synthesis+ko00590//Arachidonic …		PREDICTED: probable phospholipid hydroperoxide glutathione peroxidase isoform X1 [Diaphorina citri] >XP_017298100.1 PREDICTED: probable phospholipid hydroperoxide glutathione peroxidase isoform X2 [Diaphorina citri]	Glutathione peroxidase	[O] KOG1651 Glutathione peroxidase	Glutathione peroxidase OS=Schistosoma mansoni GN=GPX1 PE=1 SV=2	GO:0006979//response to oxidative stress;GO:0004602//glutathione peroxidase activity;GO:0016021//integral component of membrane
CL161.Contig9_All	0.933	4.23	2.17759	1.39302e-89	2.8027e-90		K00432//glutathione peroxidase [EC:1.11.1.9]+ko04918//Thyroid hormone synthesis+ko00590//Arachidonic acid metabolism+ko00480//Glutathione metabolism;K00432//glutathione peroxidase [EC:1.11.1.9]+ko04918//Thyroid hormone synthesis+ko00590//Arachidonic acid metabolism+ko00480//Glutathione metabolism;K00432//glutathione peroxidase [EC:1.11.1.9]+ko04918//Thyroid hormone synthesis+ko00590//Arachidonic …		probable phospholipid hydroperoxide glutathione peroxidase [Nilaparvata lugens]	Glutathione peroxidase	[O] KOG1651 Glutathione peroxidase	Glutathione peroxidase OS=Schistosoma mansoni GN=GPX1 PE=1 SV=2	GO:0006979//response to oxidative stress;GO:0004602//glutathione peroxidase activity
CL1610.Contig2_All	10.706	23.333	1.12387	8.0206e-173	8.55241e-174		K00856//adenosine kinase [EC:2.7.1.20]+ko00230//Purine metabolism+ko01100//Metabolic pathways;K00856//adenosine kinase [EC:2.7.1.20]+ko00230//Purine metabolism+ko01100//Metabolic pathways;K00856//adenosine kinase [EC:2.7.1.20]+ko00230//Purine metabolism+ko01100//Metabolic pathways;K00856//adenosine kinase [EC:2.7.1.20]+ko00230//Purine metabolism+ko01100//Metabolic pathways;K00856//adenosine kinas…		PREDICTED: adenosine kinase 2 [Cephus cinctus]	pfkB family carbohydrate kinase	[G] KOG2854 Possible pfkB family carbohydrate kinase	Adenosine kinase OS=Rattus norvegicus GN=Adk PE=1 SV=3
CL1620.Contig2_All	3.333	6.923	1.05395	2.25925e-17	1.62175e-17		K10415//dynein intermediate chain, cytosolic+ko04145//Phagosome+ko05132//Salmonella infection+ko04962//Vasopressin-regulated water reabsorption;K10415//dynein intermediate chain, cytosolic+ko04145//Phagosome+ko05132//Salmonella infection+ko04962//Vasopressin-regulated water reabsorption;K10415//dynein intermediate chain, cytosolic+ko04145//Phagosome+ko05132//Salmonella infection+ko04962//Vasopres…	XM_015328081.1 PREDICTED: Polistes dominula cytoplasmic dynein 1 intermediate chain-like (LOC107070153), transcript variant X14, mRNA	cytoplasmic dynein 1 intermediate chain isoform X3 [Nilaparvata lugens]	Cytoplasmic dynein 1 intermediate chain 2	[Z] KOG1587 Cytoplasmic dynein intermediate chain	Cytoplasmic dynein 1 intermediate chain OS=Drosophila melanogaster GN=sw PE=1 SV=3
CL1622.Contig1_All	0.583	7.02	3.57215	0	0					OB-fold nucleic acid binding domain
CL1622.Contig2_All	0.426	2.366	2.45535	8.07965e-80	1.82495e-80					OB-fold nucleic acid binding domain
CL1622.Contig3_All	0.186	1.68	3.16733	2.54607e-72	6.21021e-73					OB-fold nucleic acid binding domain
CL1622.Contig4_All	0.89	11.126	3.63191	0	0					OB-fold nucleic acid binding domain
CL1622.Contig5_All	0.16	3.17	4.31632	7.21874e-194	6.85781e-195					OB-fold nucleic acid binding domain
CL1622.Contig6_All	0.7	13.856	4.2933	0	0					OB-fold nucleic acid binding domain
CL1622.Contig7_All	5.003	31.843	2.65773	0	0					OB-fold nucleic acid binding domain
CL1624.Contig2_All	13.423	59.233	2.14599	0	0
CL1626.Contig1_All	0.733	2.686	1.87684	7.04507e-31	3.41916e-31
CL1629.Contig2_All	0.67	2.603	1.98167	8.31863e-13	7.15403e-13
CL163.Contig12_All	0.073	0.403	2.46066	9.69083e-12	8.76705e-12			AY691414.1 Vryburgia amaryllidis cytochrome b (cytb) gene, partial cds; NADH dehydrogenase subunit 1 (nd1) gene, complete cds; large subunit ribosomal RNA gene, complete sequence; and small subunit ribosomal RNA gene, partial sequence; mitochondrial	retrovirus-related pol polyprotein from transposon tnt 1-94 [Lasius niger]		[R] KOG0017 FOG: Transposon-encoded proteins with TYA, reverse transcriptase, integrase domains in various combinations
CL163.Contig4_All	0.103	0.51	2.31546	3.5466e-17	2.56473e-17			AY691414.1 Vryburgia amaryllidis cytochrome b (cytb) gene, partial cds; NADH dehydrogenase subunit 1 (nd1) gene, complete cds; large subunit ribosomal RNA gene, complete sequence; and small subunit ribosomal RNA gene, partial sequence; mitochondrial	retrovirus-related pol polyprotein from transposon tnt 1-94 [Lasius niger]		[R] KOG0017 FOG: Transposon-encoded proteins with TYA, reverse transcriptase, integrase domains in various combinations
CL1650.Contig3_All	1.283	2.99	1.22708	8.58426e-13	7.39087e-13	zf-C2H2	K09228//KRAB domain-containing zinc finger protein;K09228//KRAB domain-containing zinc finger protein;K09228//KRAB domain-containing zinc finger protein;K09228//KRAB domain-containing zinc finger protein;K09228//KRAB domain-containing zinc finger protein		PREDICTED: zinc finger protein 252-like [Cynoglossus semilaevis]		[R] KOG1721 FOG: Zn-finger	Zinc finger protein 467 OS=Homo sapiens GN=ZNF467 PE=1 SV=1	GO:0003676//nucleic acid binding
CL1666.Contig2_All	5.493	13.476	1.29442	0	0		K00993//ethanolaminephosphotransferase [EC:2.7.8.1]+ko00440//Phosphonate and phosphinate metabolism+ko00564//Glycerophospholipid metabolism+ko00565//Ether lipid metabolism+ko01100//Metabolic pathways;K00993//ethanolaminephosphotransferase [EC:2.7.8.1]+ko00440//Phosphonate and phosphinate metabolism+ko00564//Glycerophospholipid metabolism+ko00565//Ether lipid metabolism+ko01100//Metabolic pathways…		cholinephosphotransferase 1 isoform X3 [Zootermopsis nevadensis] >KDR22680.1 Choline/ethanolaminephosphotransferase 1 [Zootermopsis nevadensis]	CDP-alcohol phosphatidyltransferase	[I] KOG2877 sn-1,2-diacylglycerol ethanolamine- and cholinephosphotranferases	Choline/ethanolaminephosphotransferase 1 OS=Gallus gallus GN=CEPT1 PE=2 SV=2
CL1668.Contig1_All	0.423	2.076	2.30118	1.19793e-12	1.03868e-12
CL1674.Contig1_All	0.6	1.47	1.30501	0.000332166	0.000505434
CL1678.Contig1_All	0.06	1.466	4.66951	1.01962e-30	4.96954e-31			CP020790.1 Oryzias latipes strain HNI chromosome 12
CL1678.Contig2_All	0.77	2.91	1.91856	1.30453e-38	5.36983e-39			LL785471.1 Gongylonema pulchrum genome assembly G_pulchrum_Hokkaido ,scaffold GPUH_contig0009507
CL1690.Contig1_All	0	0.263	5.95964	7.4431e-09	7.83549e-09
CL1691.Contig3_All	0	0.04	5.59314	3.16031e-07	3.70203e-07		K18405//tudor domain-containing protein 1/4/6/7;K18405//tudor domain-containing protein 1/4/6/7;K18405//tudor domain-containing protein 1/4/6/7;K18405//tudor domain-containing protein 1/4/6/7;K18405//tudor domain-containing protein 1/4/6/7		PREDICTED: maternal protein tudor-like isoform X3 [Papilio machaon]	Tudor domain	[A] KOG0117 Heterogeneous nuclear ribonucleoprotein R (RRM superfamily)	Uncharacterized protein DDB_G0284459 OS=Dictyostelium discoideum GN=DDB_G0284459 PE=4 SV=1
CL1698.Contig2_All	2.733	5.576	1.02199	1.3942e-39	5.61319e-40		K12591//exosome complex exonuclease RRP6 [EC:3.1.13.-]+ko03018//RNA degradation;K12591//exosome complex exonuclease RRP6 [EC:3.1.13.-]+ko03018//RNA degradation;K12591//exosome complex exonuclease RRP6 [EC:3.1.13.-]+ko03018//RNA degradation;K12591//exosome complex exonuclease RRP6 [EC:3.1.13.-]+ko03018//RNA degradation;K12591//exosome complex exonuclease RRP6 [EC:3.1.13.-]+ko03018//RNA degradation		exosome component 10 [Zootermopsis nevadensis] >KDR14061.1 Exosome component 10 [Zootermopsis nevadensis]	3'-5' exonuclease	[J] KOG2206 Exosome 3'-5' exoribonuclease complex, subunit PM/SCL-100 (Rrp6)	Exosome component 10 OS=Mus musculus GN=Exosc10 PE=1 SV=2	GO:0006396//RNA processing;GO:0008408//3'-5' exonuclease activity;GO:0000166//nucleotide binding;GO:0000176//nuclear exosome (RNase complex);GO:0003676//nucleic acid binding
CL1699.Contig1_All	5.213	10.683	1.02958	2.42227e-55	7.44322e-56
CL1699.Contig2_All	14.716	35.086	1.2535	8.81248e-254	6.43695e-255
CL1699.Contig3_All	2.706	7.313	1.43305	1.09365e-60	3.08957e-61
CL1701.Contig1_All	0.3	1.033	1.76394	8.70985e-12	7.86538e-12
CL1701.Contig4_All	0.05	0.496	3.2799	3.09367e-12	2.7295e-12					Putative zinc-finger between two C2H2 zinc-fingers on Patz
CL1704.Contig1_All	1.453	3.203	1.12953	1.88182e-28	9.6648e-29		K17495//CUB and sushi domain-containing protein;K06819//neuropilin 2;K19479//collagen, type X, alpha+ko04974//Protein digestion and absorption		PREDICTED: uncharacterized protein LOC105837883 [Monomorium pharaonis]	MAM domain, meprin/A5/mu		Probable cyclin-dependent serine/threonine-protein kinase DDB_G0292550 OS=Dictyostelium discoideum GN=DDB_G0292550 PE=3 SV=1
CL1708.Contig3_All	5.746	20.6	1.83855	0	0	zf-C2H2	K11262//acetyl-CoA carboxylase / biotin carboxylase 1 [EC:6.4.1.2 6.3.4.14 2.1.3.15]+ko04910//Insulin signaling pathway+ko00640//Propanoate metabolism+ko00061//Fatty acid biosynthesis+ko00620//Pyruvate metabolism+ko04152//AMPK signaling pathway+ko01100//Metabolic pathways+ko01212//Fatty acid metabolism+ko04922//Glucagon signaling pathway;K11262//acetyl-CoA carboxylase / biotin carboxylase 1 [EC:6…	XM_015655289.1 PREDICTED: Neodiprion lecontei acetyl-CoA carboxylase (LOC107217669), transcript variant X5, mRNA	PREDICTED: acetyl-CoA carboxylase isoform X3 [Bemisia tabaci]	Acetyl-CoA carboxylase, central region	[I] KOG0368 Acetyl-CoA carboxylase	Acetyl-CoA carboxylase 1 OS=Mus musculus GN=Acaca PE=1 SV=1
CL1708.Contig4_All	6.883	21.46	1.63518	0	0	zf-C2H2	K11262//acetyl-CoA carboxylase / biotin carboxylase 1 [EC:6.4.1.2 6.3.4.14 2.1.3.15]+ko04910//Insulin signaling pathway+ko00640//Propanoate metabolism+ko00061//Fatty acid biosynthesis+ko00620//Pyruvate metabolism+ko04152//AMPK signaling pathway+ko01100//Metabolic pathways+ko01212//Fatty acid metabolism+ko04922//Glucagon signaling pathway;K11262//acetyl-CoA carboxylase / biotin carboxylase 1 [EC:6…	XM_015655289.1 PREDICTED: Neodiprion lecontei acetyl-CoA carboxylase (LOC107217669), transcript variant X5, mRNA	PREDICTED: acetyl-CoA carboxylase isoform X3 [Bemisia tabaci]	Acetyl-CoA carboxylase, central region	[I] KOG0368 Acetyl-CoA carboxylase	Acetyl-CoA carboxylase 1 OS=Mus musculus GN=Acaca PE=1 SV=1
CL1709.Contig5_All	0.15	0.653	2.14728	3.4894e-06	4.42775e-06		K18764//nocturnin [EC:3.1.13.4];K18764//nocturnin [EC:3.1.13.4];K18764//nocturnin [EC:3.1.13.4];K18764//nocturnin [EC:3.1.13.4]		nocturnin isoform X1 [Nilaparvata lugens]
CL171.Contig9_All	0.06	0.186	1.60201	0.000142825	0.000208912		K21286//protein N-terminal glutamine amidohydrolase [EC:3.5.1.122];K21286//protein N-terminal glutamine amidohydrolase [EC:3.5.1.122];K21286//protein N-terminal glutamine amidohydrolase [EC:3.5.1.122];K21286//protein N-terminal glutamine amidohydrolase [EC:3.5.1.122];K21286//protein N-terminal glutamine amidohydrolase [EC:3.5.1.122]		PREDICTED: protein N-terminal glutamine amidohydrolase [Zeugodacus cucurbitae] >XP_011193904.1 PREDICTED: protein N-terminal glutamine amidohydrolase [Zeugodacus cucurbitae] >XP_011193905.1 PREDICTED: protein N-terminal glutamine amidohydrolase [Zeugodacus cucurbitae] >XP_011193907.1 PREDICTED: protein N-terminal glutamine amidohydrolase [Zeugodacus cucurbitae] >XP_011193908.1 PREDICTED: protein …	Borna disease virus G protein	[S] KOG3261 Uncharacterized conserved protein	Protein N-terminal glutamine amidohydrolase OS=Drosophila melanogaster GN=tun PE=2 SV=1	GO:0016811//hydrolase activity, acting on carbon-nitrogen (but not peptide) bonds, in linear amides;GO:0007611//learning or memory;GO:0008355//olfactory learning
CL1710.Contig3_All	10.116	24.14	1.25689	1.94942e-190	1.89857e-191		K18264//integral membrane protein 2B;K18264//integral membrane protein 2B;K18264//integral membrane protein 2B;K18264//integral membrane protein 2B;K18264//integral membrane protein 2B		conserved hypothetical protein [Maconellicoccus hirsutus]	BRICHOS domain	[S] KOG4681 Uncharacterized conserved protein	Integral membrane protein 2C OS=Pongo abelii GN=ITM2C PE=2 SV=1	GO:0016021//integral component of membrane
CL1710.Contig5_All	9.48	32.29	1.76058	0	0	CSD	K15176//RNA polymerase-associated protein CTR9;K17498//transcription factor SPN1;K15176//RNA polymerase-associated protein CTR9;K15176//RNA polymerase-associated protein CTR9;K15176//RNA polymerase-associated protein CTR9		PREDICTED: RNA polymerase-associated protein CTR9 homolog isoform X2 [Anoplophora glabripennis]	BRICHOS domain	[K] LSE0096 H SON DNA-binding protein/negative regulatory element-binding protein	Uncharacterized protein DDB_G0287625 OS=Dictyostelium discoideum GN=DDB_G0287625 PE=4 SV=1	GO:0000380//alternative mRNA splicing, via spliceosome
CL1717.Contig2_All	0	0.336	7.45815	1.18936e-20	7.60285e-21		K12480//Rab GTPase-binding effector protein 1+ko04144//Endocytosis;K12480//Rab GTPase-binding effector protein 1+ko04144//Endocytosis;K12480//Rab GTPase-binding effector protein 1+ko04144//Endocytosis;K12480//Rab GTPase-binding effector protein 1+ko04144//Endocytosis;K12480//Rab GTPase-binding effector protein 1+ko04144//Endocytosis	XM_019054724.1 PREDICTED: Bemisia tabaci rab GTPase-binding effector protein 1 (LOC109039298), transcript variant X3, mRNA	rab GTPase-binding effector protein 1 [Zootermopsis nevadensis]	Rabaptin-like protein	[U] KOG0993 Rab5 GTPase effector Rabaptin-5	Rab GTPase-binding effector protein 1 OS=Mus musculus GN=Rabep1 PE=1 SV=2
CL1718.Contig2_All	0.273	0.753	1.49065	7.2034e-05	0.000102281					Doublesex dimerisation domain
CL1719.Contig1_All	0.126	0.7	2.46968	2.85214e-10	2.75883e-10
CL1719.Contig2_All	0.506	3.156	2.6346	1.43526e-98	2.63963e-99				hypothetical protein TRFO_13846 [Tritrichomonas foetus]	Laminin Domain II
CL1722.Contig5_All	0.193	2	3.37256	1.96963e-67	5.11248e-68		K18592//gamma-glutamyltranspeptidase / glutathione hydrolase / leukotriene-C4 hydrolase [EC:2.3.2.2 3.4.19.13 3.4.19.14]+ko00590//Arachidonic acid metabolism+ko00480//Glutathione metabolism+ko00430//Taurine and hypotaurine metabolism+ko01100//Metabolic pathways;K18592//gamma-glutamyltranspeptidase / glutathione hydrolase / leukotriene-C4 hydrolase [EC:2.3.2.2 3.4.19.13 3.4.19.14]+ko00590//Arachid…		PREDICTED: gamma-glutamyltranspeptidase 1-like [Halyomorpha halys]	Gamma-glutamyltranspeptidase	[E] KOG2410 Gamma-glutamyltransferase	Glutathione hydrolase 1 proenzyme OS=Mus musculus GN=Ggt1 PE=1 SV=1	GO:0006751//glutathione catabolic process;GO:0016021//integral component of membrane;GO:0036374//glutathione hydrolase activity
CL1722.Contig7_All	0.16	0.323	1.00858	0.000880053	0.00140876		K18592//gamma-glutamyltranspeptidase / glutathione hydrolase / leukotriene-C4 hydrolase [EC:2.3.2.2 3.4.19.13 3.4.19.14]+ko00590//Arachidonic acid metabolism+ko00480//Glutathione metabolism+ko00430//Taurine and hypotaurine metabolism+ko01100//Metabolic pathways;K18592//gamma-glutamyltranspeptidase / glutathione hydrolase / leukotriene-C4 hydrolase [EC:2.3.2.2 3.4.19.13 3.4.19.14]+ko00590//Arachid…	XM_021848658.1 PREDICTED: Aedes aegypti gamma-glutamyltranspeptidase 1 (LOC5579337), transcript variant X3, mRNA	gamma-glutamyltranspeptidase 1-like isoform X1 [Zootermopsis nevadensis] >XP_021926887.1 gamma-glutamyltranspeptidase 1-like isoform X1 [Zootermopsis nevadensis] >XP_021926888.1 gamma-glutamyltranspeptidase 1-like isoform X1 [Zootermopsis nevadensis] >XP_021926889.1 gamma-glutamyltranspeptidase 1-like isoform X1 [Zootermopsis nevadensis] >XP_021926890.1 gamma-glutamyltranspeptidase 1-like isoform…	Gamma-glutamyltranspeptidase	[E] KOG2410 Gamma-glutamyltransferase	Glutathione hydrolase 1 proenzyme OS=Rattus norvegicus GN=Ggt1 PE=1 SV=4	GO:0006751//glutathione catabolic process;GO:0016021//integral component of membrane;GO:0036374//glutathione hydrolase activity
CL1731.Contig3_All	0	0.636	8.31911	1.66168e-33	7.60941e-34		K20840//MFS transporter, PCFT/HCP family, solute carrier family 46, member 3;K20840//MFS transporter, PCFT/HCP family, solute carrier family 46, member 3;K20840//MFS transporter, PCFT/HCP family, solute carrier family 46, member 3;K20840//MFS transporter, PCFT/HCP family, solute carrier family 46, member 3;K20840//MFS transporter, PCFT/HCP family, solute carrier family 46, member 3		PREDICTED: uncharacterized protein LOC107169971 [Diuraphis noxia]	Major Facilitator Superfamily	[R] KOG2816 Predicted transporter ADD1 (major facilitator superfamily)	Solute carrier family 46 member 3 OS=Gallus gallus GN=SLC46A3 PE=2 SV=1	GO:0055085//transmembrane transport;GO:0016021//integral component of membrane
CL1734.Contig2_All	1.183	2.636	1.16605	1.27021e-32	5.9272e-33		K22611//squamous cell carcinoma antigen recognized by T-cells 3	XM_022325019.1 PREDICTED: Myzus persicae ecto-NOX disulfide-thiol exchanger 2 (LOC111040932), transcript variant X2, mRNA	PREDICTED: ecto-NOX disulfide-thiol exchanger 2 [Anoplophora glabripennis]	RNA recognition motif. (a.k.a. RRM, RBD, or RNP domain)	[R] KOG1721 FOG: Zn-finger	Ecto-NOX disulfide-thiol exchanger 2 OS=Mus musculus GN=Enox2 PE=2 SV=1	GO:0003723//RNA binding
CL1734.Contig4_All	0.616	2.623	2.11094	6.31499e-71	1.56983e-71		K10507//zinc finger and BTB domain-containing protein 33;K22611//squamous cell carcinoma antigen recognized by T-cells 3		PREDICTED: ecto-NOX disulfide-thiol exchanger 2 isoform X2 [Tribolium castaneum] >EEZ99476.1 Ecto-NOX disulfide-thiol exchanger 1-like Protein [Tribolium castaneum]	RNA recognition motif. (a.k.a. RRM, RBD, or RNP domain)	[R] KOG1721 FOG: Zn-finger	Ecto-NOX disulfide-thiol exchanger 2 OS=Mus musculus GN=Enox2 PE=2 SV=1	GO:0003723//RNA binding
CL1735.Contig1_All	3.536	9.406	1.41178	1.67209e-77	3.8658e-78		K20794//N-alpha-acetyltransferase 40 [EC:2.3.1.257];K20794//N-alpha-acetyltransferase 40 [EC:2.3.1.257];K20794//N-alpha-acetyltransferase 40 [EC:2.3.1.257];K20794//N-alpha-acetyltransferase 40 [EC:2.3.1.257];K20794//N-alpha-acetyltransferase 40 [EC:2.3.1.257]		N-alpha-acetyltransferase 40 [Coptotermes formosanus]	Acetyltransferase (GNAT) family	[R] KOG2488 Acetyltransferase (GNAT) domain-containing protein	N-alpha-acetyltransferase 40 OS=Xenopus laevis GN=naa40 PE=2 SV=1	GO:0008080//N-acetyltransferase activity
CL1735.Contig2_All	2.173	4.99	1.25247	5.77387e-06	7.45583e-06
CL1741.Contig1_All	0	2.493	5.93626	9.69785e-09	1.02776e-08
CL1749.Contig1_All	4.523	40.043	3.14732	0	0		K02359//egghead protein (zeste-white 4 protein)+ko04320//Dorso-ventral axis formation;K02359//egghead protein (zeste-white 4 protein)+ko04320//Dorso-ventral axis formation;K02359//egghead protein (zeste-white 4 protein)+ko04320//Dorso-ventral axis formation;K02359//egghead protein (zeste-white 4 protein)+ko04320//Dorso-ventral axis formation;K02359//egghead protein (zeste-white 4 protein)+ko04320…		glycosphingolipid synthetase [Plutella xylostella]	Glycosyl transferase family group 2		Beta-1,4-mannosyltransferase egh OS=Drosophila melanogaster GN=egh PE=2 SV=1
CL1761.Contig2_All	0.166	0.48	1.54308	6.70328e-24	3.89155e-24		K06756//neuronal cell adhesion molecule+ko04514//Cell adhesion molecules (CAMs);K06756//neuronal cell adhesion molecule+ko04514//Cell adhesion molecules (CAMs);K06756//neuronal cell adhesion molecule+ko04514//Cell adhesion molecules (CAMs);K06756//neuronal cell adhesion molecule+ko04514//Cell adhesion molecules (CAMs)	XR_002499664.1 PREDICTED: Aedes aegypti neuroglian (LOC5570456), transcript variant X9, misc_RNA	neuroglian isoform X2 [Zootermopsis nevadensis] >XP_021912841.1 neuroglian isoform X2 [Zootermopsis nevadensis]	Immunoglobulin I-set domain	[T] KOG3513 Neural cell adhesion molecule L1	Neuroglian OS=Drosophila melanogaster GN=Nrg PE=1 SV=2
CL1761.Contig4_All	0.11	0.246	1.14912	1.97032e-06	2.44619e-06		K06756//neuronal cell adhesion molecule+ko04514//Cell adhesion molecules (CAMs);K06756//neuronal cell adhesion molecule+ko04514//Cell adhesion molecules (CAMs);K06756//neuronal cell adhesion molecule+ko04514//Cell adhesion molecules (CAMs);K06756//neuronal cell adhesion molecule+ko04514//Cell adhesion molecules (CAMs)	XR_002499664.1 PREDICTED: Aedes aegypti neuroglian (LOC5570456), transcript variant X9, misc_RNA	neuroglian isoform X2 [Zootermopsis nevadensis] >XP_021912841.1 neuroglian isoform X2 [Zootermopsis nevadensis]	Immunoglobulin I-set domain	[T] KOG3513 Neural cell adhesion molecule L1	Neuroglian OS=Drosophila melanogaster GN=Nrg PE=1 SV=2
CL1768.Contig1_All	0.113	0.706	2.64794	1.86884e-34	8.36915e-35		K10203//elongation of very long chain fatty acids protein 6 [EC:2.3.1.199]+ko01040//Biosynthesis of unsaturated fatty acids+ko00062//Fatty acid elongation+ko01100//Metabolic pathways+ko01212//Fatty acid metabolism;K10203//elongation of very long chain fatty acids protein 6 [EC:2.3.1.199]+ko01040//Biosynthesis of unsaturated fatty acids+ko00062//Fatty acid elongation+ko01100//Metabolic pathways+ko…		PREDICTED: elongation of very long chain fatty acids protein 6 [Diaphorina citri]	GNS1/SUR4 family	[I] KOG3072 Long chain fatty acid elongase	Elongation of very long chain fatty acids protein 6 OS=Danio rerio GN=elovl6 PE=2 SV=1	GO:0102336//3-oxo-arachidoyl-CoA synthase activity;GO:0102756//very-long-chain 3-ketoacyl-CoA synthase activity;GO:0102337//3-oxo-cerotoyl-CoA synthase activity;GO:0016021//integral component of membrane;GO:0006633//fatty acid biosynthetic process;GO:0102338//3-oxo-lignoceronyl-CoA synthase activity
CL1768.Contig3_All	9.05	18.536	1.03313	8.60606e-136	1.17959e-136		K10203//elongation of very long chain fatty acids protein 6 [EC:2.3.1.199]+ko01040//Biosynthesis of unsaturated fatty acids+ko00062//Fatty acid elongation+ko01100//Metabolic pathways+ko01212//Fatty acid metabolism;K10203//elongation of very long chain fatty acids protein 6 [EC:2.3.1.199]+ko01040//Biosynthesis of unsaturated fatty acids+ko00062//Fatty acid elongation+ko01100//Metabolic pathways+ko…	XM_015647315.2 PREDICTED: Parus major spalt like transcription factor 4 (SALL4), transcript variant X5, mRNA	PREDICTED: elongation of very long chain fatty acids protein 6 isoform X2 [Tribolium castaneum] >EFA03752.1 Elongation of very long chain fatty acids protein 6-like Protein [Tribolium castaneum]	GNS1/SUR4 family	[I] KOG3072 Long chain fatty acid elongase	Elongation of very long chain fatty acids protein 6 OS=Danio rerio GN=elovl6 PE=2 SV=1	GO:0102336//3-oxo-arachidoyl-CoA synthase activity;GO:0102756//very-long-chain 3-ketoacyl-CoA synthase activity;GO:0102337//3-oxo-cerotoyl-CoA synthase activity;GO:0016021//integral component of membrane;GO:0006633//fatty acid biosynthetic process;GO:0102338//3-oxo-lignoceronyl-CoA synthase activity
CL1776.Contig1_All	0	0.19	5.89974	1.45462e-08	1.55897e-08		K19867//LIM domain-binding protein 3;K19867//LIM domain-binding protein 3;K19867//LIM domain-binding protein 3;K19867//LIM domain-binding protein 3		PDZ and LIM domain protein 3 isoform X1 [Myzus persicae]	Domain of unknown function (DUF4749)	[TZ] KOG1703 Adaptor protein Enigma and related PDZ-LIM proteins	PDZ and LIM domain protein Zasp OS=Drosophila melanogaster GN=Zasp52 PE=1 SV=2
CL178.Contig3_All	1.13	11.013	3.28078	0	0		K01431//beta-ureidopropionase [EC:3.5.1.6]+ko00410//beta-Alanine metabolism+ko00983//Drug metabolism - other enzymes+ko00770//Pantothenate and CoA biosynthesis+ko00240//Pyrimidine metabolism+ko01100//Metabolic pathways;K01431//beta-ureidopropionase [EC:3.5.1.6]+ko00410//beta-Alanine metabolism+ko00983//Drug metabolism - other enzymes+ko00770//Pantothenate and CoA biosynthesis+ko00240//Pyrimidine …		PREDICTED: beta-ureidopropionase [Bemisia tabaci]	Carbon-nitrogen hydrolase	[E] KOG0808 Carbon-nitrogen hydrolase	Beta-ureidopropionase OS=Pongo abelii GN=UPB1 PE=2 SV=1
CL1782.Contig2_All	1.76	14.623	3.04354	0	0	zf-C2H2	K22534//PR domain zinc finger protein 5;K22534//PR domain zinc finger protein 5;K22534//PR domain zinc finger protein 5;K22534//PR domain zinc finger protein 5;K22534//PR domain zinc finger protein 5		PR domain zinc finger protein 5 [Chelonia mydas]	Zinc finger, C2H2 type	[R] KOG1721 FOG: Zn-finger	Zinc finger protein 287 OS=Homo sapiens GN=ZNF287 PE=2 SV=1
CL1803.Contig10_All	0	0.15	4.47695	0.000513312	0.000797866
CL1803.Contig2_All	0.46	1.5	1.71545	1.3771e-11	1.2557e-11
CL1803.Contig4_All	0.48	1.006	1.07059	1.59578e-06	1.96795e-06
CL1803.Contig6_All	0.36	0.813	1.18473	2.60877e-07	3.0395e-07
CL1803.Contig9_All	0.253	0.756	1.56705	1.69668e-09	1.71991e-09
CL1804.Contig2_All	1.666	3.97	1.25205	2.89493e-29	1.46068e-29		K12196//vacuolar protein-sorting-associated protein 4+ko04144//Endocytosis+ko04217//Necroptosis		protein FAM49B isoform X1 [Zootermopsis nevadensis] >KDR17574.1 hypothetical protein L798_08484 [Zootermopsis nevadensis]	Protein of unknown function (DUF1394)	[S] KOG3951 Uncharacterized conserved protein	Protein FAM49B OS=Mus musculus GN=Fam49b PE=1 SV=1
CL1810.Contig1_All	0.066	1.016	3.95158	8.23167e-38	3.43315e-38		K01368//cathepsin S [EC:3.4.22.27]+ko04145//Phagosome+ko04142//Lysosome+ko04210//Apoptosis+ko04612//Antigen processing and presentation+ko05152//Tuberculosis;K01368//cathepsin S [EC:3.4.22.27]+ko04145//Phagosome+ko04142//Lysosome+ko04210//Apoptosis+ko04612//Antigen processing and presentation+ko05152//Tuberculosis;K01365//cathepsin L [EC:3.4.22.15]+ko04145//Phagosome+ko04140//Autophagy - animal+k…		PREDICTED: digestive cysteine proteinase 1 [Nicrophorus vespilloides]	Papain family cysteine protease	[O] KOG1543 Cysteine proteinase Cathepsin L	Cathepsin S OS=Saimiri boliviensis boliviensis GN=CTSS PE=2 SV=1
CL1816.Contig3_All	0.213	0.7	1.73958	8.25269e-16	6.28551e-16		K16600//tubulin polyglutamylase TTLL2 [EC:6.-.-.-]		LOW QUALITY PROTEIN: UNC93-like protein MFSD11 [Zootermopsis nevadensis]	Ion channel regulatory protein UNC-93	[S] KOG3098 Uncharacterized conserved protein	UNC93-like protein MFSD11 OS=Homo sapiens GN=MFSD11 PE=2 SV=2	GO:0016021//integral component of membrane
CL1816.Contig4_All	0.28	1.536	2.44931	1.08845e-50	3.60846e-51				LOW QUALITY PROTEIN: UNC93-like protein MFSD11 [Zootermopsis nevadensis]	Ion channel regulatory protein UNC-93	[S] KOG3098 Uncharacterized conserved protein	UNC93-like protein MFSD11 OS=Homo sapiens GN=MFSD11 PE=2 SV=2
CL1819.Contig13_All	0	0.17	4.59619	0.000291256	0.000440208		K04883//potassium voltage-gated channel Shaker-related subfamily A, beta member 2;K04884//potassium voltage-gated channel Shaker-related subfamily A, beta member 3;K04884//potassium voltage-gated channel Shaker-related subfamily A, beta member 3;K04883//potassium voltage-gated channel Shaker-related subfamily A, beta member 2;K04883//potassium voltage-gated channel Shaker-related subfamily A, bet…		PREDICTED: L-galactose dehydrogenase-like [Fopius arisanus]	Aldo/keto reductase family	[C] KOG1576 Predicted oxidoreductase	Voltage-gated potassium channel subunit beta-1 OS=Homo sapiens GN=KCNAB1 PE=1 SV=1	GO:0016491//oxidoreductase activity
CL1822.Contig9_All	0.626	1.343	1.08721	1.10585e-24	6.2733e-25	CP2	K09275//transcription factor CP2 and related proteins;K09275//transcription factor CP2 and related proteins;K09275//transcription factor CP2 and related proteins;K09275//transcription factor CP2 and related proteins;K09275//transcription factor CP2 and related proteins	XM_015511795.1 PREDICTED: Diuraphis noxia protein grainyhead (LOC107164101), mRNA	protein grainyhead-like isoform X5 [Myzus persicae]	CP2 transcription factor	[K] KOG4091 Transcription factor	Protein grainyhead OS=Drosophila melanogaster GN=grh PE=2 SV=3
CL1829.Contig4_All	0.86	9.6	3.48051	0	0		K00030//isocitrate dehydrogenase (NAD+) [EC:1.1.1.41]+ko01200//Carbon metabolism+ko01230//Biosynthesis of amino acids+ko00020//Citrate cycle (TCA cycle)+ko01100//Metabolic pathways+ko01210//2-Oxocarboxylic acid metabolism;K00030//isocitrate dehydrogenase (NAD+) [EC:1.1.1.41]+ko01200//Carbon metabolism+ko01230//Biosynthesis of amino acids+ko00020//Citrate cycle (TCA cycle)+ko01100//Metabolic pathw…		PREDICTED: isocitrate dehydrogenase [NAD] subunit gamma, mitochondrial-like [Diaphorina citri]	Isocitrate/isopropylmalate dehydrogenase	[E] KOG0784 Isocitrate dehydrogenase, gamma subunit	Isocitrate dehydrogenase [NAD] subunit gamma, mitochondrial (Fragment) OS=Macaca fascicularis GN=IDH3G PE=2 SV=1	GO:0006099//tricarboxylic acid cycle;GO:0004449//isocitrate dehydrogenase (NAD+) activity
CL187.Contig5_All	1.643	4.31	1.40064	1.08903e-38	4.47685e-39	ZBTB	K10523//speckle-type POZ protein+ko04341//Hedgehog signaling pathway - fly+ko04340//Hedgehog signaling pathway;K10523//speckle-type POZ protein+ko04341//Hedgehog signaling pathway - fly+ko04340//Hedgehog signaling pathway;K10523//speckle-type POZ protein+ko04341//Hedgehog signaling pathway - fly+ko04340//Hedgehog signaling pathway;K10523//speckle-type POZ protein+ko04341//Hedgehog signaling pathw…		Protein roadkill-like Protein [Tribolium castaneum]	BTB/POZ domain	[DR] KOG1987 Speckle-type POZ protein SPOP and related proteins with TRAF, MATH and BTB/POZ domains	Speckle-type POZ protein OS=Danio rerio GN=spop PE=2 SV=1
CL187.Contig6_All	5.733	12.84	1.16235	1.0255e-85	2.16024e-86	Others	K10523//speckle-type POZ protein+ko04341//Hedgehog signaling pathway - fly+ko04340//Hedgehog signaling pathway;K10523//speckle-type POZ protein+ko04341//Hedgehog signaling pathway - fly+ko04340//Hedgehog signaling pathway;K10523//speckle-type POZ protein+ko04341//Hedgehog signaling pathway - fly+ko04340//Hedgehog signaling pathway;K10523//speckle-type POZ protein+ko04341//Hedgehog signaling pathw…		PREDICTED: speckle-type POZ protein B [Ciona intestinalis]	BTB/POZ domain	[DR] KOG1987 Speckle-type POZ protein SPOP and related proteins with TRAF, MATH and BTB/POZ domains	Protein roadkill OS=Drosophila melanogaster GN=rdx PE=1 SV=2
CL1870.Contig3_All	1.5	3.666	1.28326	2.54122e-43	9.54063e-44		K19176//fatty acid amide hydrolase 2 [EC:3.5.1.99];K19176//fatty acid amide hydrolase 2 [EC:3.5.1.99];K19176//fatty acid amide hydrolase 2 [EC:3.5.1.99];K19176//fatty acid amide hydrolase 2 [EC:3.5.1.99];K19176//fatty acid amide hydrolase 2 [EC:3.5.1.99]		fatty-acid amide hydrolase 2-like [Nilaparvata lugens]	Amidase	[JIT] KOG1212 Amidases	Fatty-acid amide hydrolase 2-B OS=Danio rerio GN=faah2b PE=2 SV=1
CL1877.Contig2_All	1.223	46.553	5.25213	0	0		K08762//diazepam-binding inhibitor (GABA receptor modulator, acyl-CoA-binding protein)+ko03320//PPAR signaling pathway;K08762//diazepam-binding inhibitor (GABA receptor modulator, acyl-CoA-binding protein)+ko03320//PPAR signaling pathway;K08762//diazepam-binding inhibitor (GABA receptor modulator, acyl-CoA-binding protein)+ko03320//PPAR signaling pathway;K08762//diazepam-binding inhibitor (GABA r…	XM_009016214.1 Helobdella robusta hypothetical protein partial mRNA	diazepam binding inhibitor [Xenopus laevis] >AAI28949.1 Dbib protein [Xenopus laevis] >OCT63227.1 hypothetical protein XELAEV_18044325mg [Xenopus laevis]		[I] KOG0817 Acyl-CoA-binding protein	Probable serine/threonine-protein kinase DDB_G0278845 OS=Dictyostelium discoideum GN=DDB_G0278845 PE=3 SV=1	GO:0000062//fatty-acyl-CoA binding
CL1878.Contig5_All	0	0.066	4.55794	0.000350643	0.000535265		K11826//AP-2 complex subunit mu-1+ko04144//Endocytosis+ko04721//Synaptic vesicle cycle+ko05016//Huntington disease+ko04961//Endocrine and other factor-regulated calcium reabsorption;K11826//AP-2 complex subunit mu-1+ko04144//Endocytosis+ko04721//Synaptic vesicle cycle+ko05016//Huntington disease+ko04961//Endocrine and other factor-regulated calcium reabsorption;K11826//AP-2 complex subunit mu-1+k…	XM_018480418.1 PREDICTED: Agrilus planipennis AP-2 complex subunit mu (LOC108744568), mRNA	PREDICTED: AP-2 complex subunit mu [Bemisia tabaci]	Adaptor complexes medium subunit family	[U] KOG0938 Adaptor complexes medium subunit family	AP-2 complex subunit mu OS=Macaca fascicularis GN=AP2M1 PE=2 SV=1
CL1890.Contig1_All	1.263	7.313	2.52777	4.89455e-253	3.59643e-254		K02366//glucuronyl/N-acetylglucosaminyl transferase EXT1 [EC:2.4.1.224 2.4.1.225]+ko00534//Glycosaminoglycan biosynthesis - heparan sulfate / heparin+ko01100//Metabolic pathways;K02366//glucuronyl/N-acetylglucosaminyl transferase EXT1 [EC:2.4.1.224 2.4.1.225]+ko00534//Glycosaminoglycan biosynthesis - heparan sulfate / heparin+ko01100//Metabolic pathways;K02366//glucuronyl/N-acetylglucosaminyl tra…	XM_022273668.1 PREDICTED: Pieris rapae exostosin-1 (LOC111003256), mRNA	PREDICTED: exostosin-1-like [Halyomorpha halys] >XP_014278349.1 PREDICTED: exostosin-1-like [Halyomorpha halys]	Glycosyl transferase family 64 domain	[GMW] KOG1021 Acetylglucosaminyltransferase EXT1/exostosin 1	Exostosin-1 OS=Drosophila melanogaster GN=ttv PE=1 SV=1
CL1895.Contig1_All	0.806	1.856	1.20625	0.000333244	0.000507256		K10409//dynein intermediate chain 1, axonemal+ko05016//Huntington disease;K10409//dynein intermediate chain 1, axonemal+ko05016//Huntington disease;K10409//dynein intermediate chain 1, axonemal+ko05016//Huntington disease;K10409//dynein intermediate chain 1, axonemal+ko05016//Huntington disease;K10409//dynein intermediate chain 1, axonemal+ko05016//Huntington disease		dynein intermediate chain 2, ciliary isoform X2 [Helicoverpa armigera]	Transcription factor IIIC subunit delta N-term	[Z] KOG1587 Cytoplasmic dynein intermediate chain	Dynein intermediate chain 1, axonemal OS=Mus musculus GN=Dnai1 PE=1 SV=1
CL19.Contig3_All	0	0.356	5.39464	1.75024e-06	2.16402e-06
CL190.Contig11_All	0	0.13	4.89727	5.66257e-05	7.96208e-05
CL190.Contig12_All	0	1.353	9.36418	1.28318e-59	3.67381e-60		K03260//translation initiation factor 4G+ko05416//Viral myocarditis+ko03013//RNA transport;K03260//translation initiation factor 4G+ko05416//Viral myocarditis+ko03013//RNA transport;K03260//translation initiation factor 4G+ko05416//Viral myocarditis+ko03013//RNA transport;K03260//translation initiation factor 4G+ko05416//Viral myocarditis+ko03013//RNA transport;K03260//translation initiation fact…		Eukaryotic translation initiation factor 4 gamma 3 [Zootermopsis nevadensis]	MIF4G domain	[J] KOG0401 Translation initiation factor 4F, ribosome/mRNA-bridging subunit (eIF-4G)	Eukaryotic translation initiation factor 4 gamma 3 OS=Homo sapiens GN=EIF4G3 PE=1 SV=2
CL190.Contig13_All	0	0.403	6.58703	1.31394e-12	1.14141e-12
CL190.Contig15_All	0.07	0.85	3.62303	1.50336e-93	2.89723e-94	ARID	K03260//translation initiation factor 4G+ko05416//Viral myocarditis+ko03013//RNA transport;K03260//translation initiation factor 4G+ko05416//Viral myocarditis+ko03013//RNA transport;K03260//translation initiation factor 4G+ko05416//Viral myocarditis+ko03013//RNA transport;K03260//translation initiation factor 4G+ko05416//Viral myocarditis+ko03013//RNA transport;K03260//translation initiation fact…	XM_017134978.1 PREDICTED: Drosophila rhopaloa ecdysone-induced protein 75B, isoforms C/D (LOC108052568), transcript variant X1, mRNA	PREDICTED: eukaryotic translation initiation factor 4 gamma 3-like isoform X4 [Linepithema humile]	MIF4G domain	[J] KOG0401 Translation initiation factor 4F, ribosome/mRNA-bridging subunit (eIF-4G)	Eukaryotic translation initiation factor 4 gamma 3 OS=Mus musculus GN=Eif4g3 PE=1 SV=2
CL190.Contig16_All	0	0.153	5.05174	2.15149e-05	2.90989e-05
CL190.Contig4_All	0	1.723	9.62332	1.24946e-68	3.19562e-69		K03260//translation initiation factor 4G+ko05416//Viral myocarditis+ko03013//RNA transport;K03260//translation initiation factor 4G+ko05416//Viral myocarditis+ko03013//RNA transport;K03260//translation initiation factor 4G+ko05416//Viral myocarditis+ko03013//RNA transport;K03260//translation initiation factor 4G+ko05416//Viral myocarditis+ko03013//RNA transport;K03260//translation initiation fact…		Eukaryotic translation initiation factor 4 gamma 3 [Zootermopsis nevadensis]	MIF4G domain	[J] KOG0401 Translation initiation factor 4F, ribosome/mRNA-bridging subunit (eIF-4G)	Eukaryotic translation initiation factor 4 gamma 3 OS=Homo sapiens GN=EIF4G3 PE=1 SV=2
CL190.Contig5_All	0	0.293	6.03926	2.9364e-09	3.02322e-09
CL1905.Contig2_All	2.253	5.036	1.16722	1.46564e-42	5.57898e-43		K18626//trichohyalin;K22909//zinc finger CCCH domain-containing protein 13;K22909//zinc finger CCCH domain-containing protein 13;K20478//golgin subfamily B member 1		PREDICTED: PERQ amino acid-rich with GYF domain-containing protein 2 isoform X1 [Bemisia tabaci]	Coiled-coil domain-containing protein 50 N-terminus		Coiled-coil domain-containing protein 50 OS=Gallus gallus GN=CCDC50 PE=2 SV=1
CL1906.Contig2_All	0.746	1.653	1.14514	9.28262e-08	1.04944e-07		K22970//17beta-estradiol 17-dehydrogenase / 3beta-hydroxysteroid 3-dehydrogenase [EC:1.1.1.62 1.1.1.270]+ko00140//Steroid hormone biosynthesis;K15890//NADP+-dependent farnesol dehydrogenase [EC:1.1.1.216]+ko00981//Insect hormone biosynthesis+ko00900//Terpenoid backbone biosynthesis;K15890//NADP+-dependent farnesol dehydrogenase [EC:1.1.1.216]+ko00981//Insect hormone biosynthesis+ko00900//Terpenoi…		3-oxoacyl-[acyl-carrier-protein] reductase 3, chloroplastic-like [Zootermopsis nevadensis]	short chain dehydrogenase	[Q] KOG1205 Predicted dehydrogenase	Farnesol dehydrogenase OS=Aedes aegypti GN=SDR-1 PE=1 SV=2
CL1910.Contig4_All	0.023	0.7	4.85624	3.60436e-26	1.96477e-26
CL1915.Contig4_All	0	3.213	11.0427	5.97441e-146	7.65634e-147	MH1	K04501//mothers against decapentaplegic homolog 4+ko04390//Hippo signaling pathway+ko04350//TGF-beta signaling pathway+ko05226//Gastric cancer+ko05225//Hepatocellular carcinoma+ko04933//AGE-RAGE signaling pathway in diabetic complications+ko04659//Th17 cell differentiation+ko04550//Signaling pathways regulating pluripotency of stem cells+ko04310//Wnt signaling pathway+ko05212//Pancreatic cancer+k…	XR_001578985.1 PREDICTED: Peromyscus maniculatus bairdii SMAD family member 4 (Smad4), transcript variant X2, misc_RNA	mothers against decapentaplegic homolog 4 isoform X4 [Zootermopsis nevadensis]	MH2 domain	[TK] KOG3701 TGFbeta receptor signaling protein SMAD and related proteins	Mothers against decapentaplegic homolog 4 OS=Bos taurus GN=SMAD4 PE=2 SV=1	GO:0007179//transforming growth factor beta receptor signaling pathway;GO:0003677//DNA binding;GO:0005634//nucleus;GO:0005667//transcription factor complex;GO:0006351//transcription, DNA-templated;GO:0003700//DNA binding transcription factor activity;GO:0005737//cytoplasm
CL1916.Contig1_All	0.206	4.446	4.42447	8.59904e-147	1.09357e-147		K02728//20S proteasome subunit alpha 3 [EC:3.4.25.1]+ko03050//Proteasome		PREDICTED: gametocyte-specific factor 1 isoform X1 [Meleagris gallopavo] >XP_010726119.1 PREDICTED: gametocyte-specific factor 1 isoform X1 [Meleagris gallopavo]	U11-48K-like CHHC zinc finger
CL1916.Contig2_All	0	1.6	8.87543	1.29443e-45	4.66979e-46		K02728//20S proteasome subunit alpha 3 [EC:3.4.25.1]+ko03050//Proteasome		PREDICTED: gametocyte-specific factor 1 isoform X1 [Meleagris gallopavo] >XP_010726119.1 PREDICTED: gametocyte-specific factor 1 isoform X1 [Meleagris gallopavo]	U11-48K-like CHHC zinc finger
CL1917.Contig2_All	7.483	22.58	1.59329	7.68338e-224	6.25528e-225		K08880//serine/threonine kinase 19 [EC:2.7.11.1];K08880//serine/threonine kinase 19 [EC:2.7.11.1];K08880//serine/threonine kinase 19 [EC:2.7.11.1];K08880//serine/threonine kinase 19 [EC:2.7.11.1];K08880//serine/threonine kinase 19 [EC:2.7.11.1]		serine/threonine-protein kinase 19 [Rhincodon typus] >XP_020391983.1 serine/threonine-protein kinase 19 [Rhincodon typus] >XP_020391984.1 serine/threonine-protein kinase 19 [Rhincodon typus]	Serine-threonine protein kinase 19	[S] KOG3483 Uncharacterized conserved protein	Ubiquitin-fold modifier 1 OS=Aedes aegypti GN=AAEL006251 PE=3 SV=1
CL1922.Contig2_All	0.483	1.423	1.55117	4.99963e-39	2.03844e-39	TF_bZIP	K20282//GRIP and coiled-coil domain-containing protein 2;K20282//GRIP and coiled-coil domain-containing protein 2;K20282//GRIP and coiled-coil domain-containing protein 2;K20282//GRIP and coiled-coil domain-containing protein 2;K20282//GRIP and coiled-coil domain-containing protein 2		GRIP and coiled-coil domain-containing protein 2 [Aedes aegypti]	GRIP domain	[Z] KOG0161 Myosin class II heavy chain	GRIP and coiled-coil domain-containing protein 2 OS=Homo sapiens GN=GCC2 PE=1 SV=4
CL1923.Contig3_All	10.576	21.373	1.00749	6.15019e-203	5.56192e-204		K05925//mRNA m6A methyltransferase [EC:2.1.1.348];K05925//mRNA m6A methyltransferase [EC:2.1.1.348];K05925//mRNA m6A methyltransferase [EC:2.1.1.348];K05925//mRNA m6A methyltransferase [EC:2.1.1.348]	XM_011180512.1 PREDICTED: Bactrocera cucurbitae probable N6-adenosine-methyltransferase MT-A70-like protein (LOC105209863), mRNA	PREDICTED: N6-adenosine-methyltransferase subunit METTL3 [Bemisia tabaci]	MT-A70	[A] KOG2098 Predicted N6-adenine RNA methylase	Probable N6-adenosine-methyltransferase MT-A70-like protein OS=Drosophila melanogaster GN=Ime4 PE=2 SV=1	GO:0016422//mRNA (2'-O-methyladenosine-N6-)-methyltransferase activity;GO:0005634//nucleus
CL1929.Contig1_All	0	6.393	11.7137	1.39994e-206	1.24169e-207		K20351//p24 family protein gamma-5;K20351//p24 family protein gamma-5;K20351//p24 family protein gamma-5;K20351//p24 family protein gamma-5;K20351//p24 family protein gamma-5	LN076179.1 Spirometra erinaceieuropaei genome assembly S_erinaceieuropaei ,scaffold SPER_scaffold0073262	PREDICTED: transmembrane emp24 domain-containing protein 1 [Diachasma alloeum]	emp24/gp25L/p24 family/GOLD	[U] KOG3287 Membrane trafficking protein, emp24/gp25L/p24 family
CL193.Contig1_All	0.106	0.6	2.48384	1.5999e-27	8.40471e-28		K04559//huntingtin interacting protein 1+ko05016//Huntington disease;K04559//huntingtin interacting protein 1+ko05016//Huntington disease;K04559//huntingtin interacting protein 1+ko05016//Huntington disease;K04559//huntingtin interacting protein 1+ko05016//Huntington disease;K04559//huntingtin interacting protein 1+ko05016//Huntington disease	AC202813.19 Macaca mulatta BAC CH250-340D2 (Children's Hospital Oakland Research Institute Rhesus macaque Adult Male BAC Library) complete sequence	PREDICTED: huntingtin-interacting protein 1 [Bemisia tabaci]	ANTH domain	[Z] KOG0980 Actin-binding protein SLA2/Huntingtin-interacting protein Hip1	Huntingtin-interacting protein 1-related protein OS=Homo sapiens GN=HIP1R PE=1 SV=2	GO:0003779//actin binding;GO:0030276//clathrin binding;GO:0006897//endocytosis;GO:0005543//phospholipid binding
CL1932.Contig4_All	0.97	14.426	3.89754	0	0		K13710//Rho guanine nucleotide exchange factor 7+ko04810//Regulation of actin cytoskeleton;K13710//Rho guanine nucleotide exchange factor 7+ko04810//Regulation of actin cytoskeleton;K13710//Rho guanine nucleotide exchange factor 7+ko04810//Regulation of actin cytoskeleton;K13710//Rho guanine nucleotide exchange factor 7+ko04810//Regulation of actin cytoskeleton;K13710//Rho guanine nucleotide exch…		rho guanine nucleotide exchange factor 7 isoform X4 [Zootermopsis nevadensis]	RhoGEF domain	[F] KOG2070 Guanine nucleotide exchange factor	Rho guanine nucleotide exchange factor 7 OS=Homo sapiens GN=ARHGEF7 PE=1 SV=2
CL1934.Contig1_All	0	0.34	6.93048	2.55691e-15	1.98939e-15	ZBTB	K10457//kelch-like protein 20;K10445//kelch-like protein 7;K10461//kelch-like protein 24/35;K10443//kelch-like protein 2/3;K10445//kelch-like protein 7		kelch-like protein 2 [Crassostrea virginica]	BTB/POZ domain	[TR] KOG4441 Proteins containing BTB/POZ and Kelch domains, involved in regulatory/signal transduction processes	Kelch-like protein 7 OS=Mus musculus GN=Klhl7 PE=2 SV=1
CL1936.Contig1_All	0.31	0.9	1.52833	2.81246e-12	2.47527e-12			LM150941.1 Schistosoma mattheei genome assembly S_mattheei_Denwood ,scaffold SMTD_scaffold0001608		3H domain
CL1937.Contig1_All	0	0.353	7.35454	1.78007e-19	1.18355e-19
CL1937.Contig2_All	0	2.856	10.4598	2.04729e-107	3.49375e-108
CL194.Contig8_All	0.37	8.523	4.52534	0	0			LL246084.1 Echinostoma caproni genome assembly E_caproni_Egypt, scaffold ECPE_scaffold0012929	protein takeout-like [Myzus persicae]	Haemolymph juvenile hormone binding protein (JHBP)		TBC1 domain family member 5 homolog A OS=Dictyostelium discoideum GN=tbc1d5A PE=1 SV=1
CL1941.Contig1_All	0	0.1	6.66716	3.41018e-13	2.88939e-13		K17686//Cu+-exporting ATPase [EC:3.6.3.54]+ko01524//Platinum drug resistance;K17686//Cu+-exporting ATPase [EC:3.6.3.54]+ko01524//Platinum drug resistance;K17686//Cu+-exporting ATPase [EC:3.6.3.54]+ko01524//Platinum drug resistance;K17686//Cu+-exporting ATPase [EC:3.6.3.54]+ko01524//Platinum drug resistance;K17686//Cu+-exporting ATPase [EC:3.6.3.54]+ko01524//Platinum drug resistance	XM_014429645.1 PREDICTED: Halyomorpha halys copper-transporting ATPase 1 (LOC106686373), transcript variant X4, mRNA	PREDICTED: copper-transporting ATPase 1 isoform X2 [Bemisia tabaci]	Heavy-metal-associated domain	[P] KOG0207 Cation transport ATPase	Copper-transporting ATPase 1 OS=Homo sapiens GN=ATP7A PE=1 SV=3
CL1941.Contig8_All	0.343	4.98	3.8622	0	0		K17686//Cu+-exporting ATPase [EC:3.6.3.54]+ko01524//Platinum drug resistance;K17686//Cu+-exporting ATPase [EC:3.6.3.54]+ko01524//Platinum drug resistance;K17686//Cu+-exporting ATPase [EC:3.6.3.54]+ko01524//Platinum drug resistance;K17686//Cu+-exporting ATPase [EC:3.6.3.54]+ko01524//Platinum drug resistance;K17686//Cu+-exporting ATPase [EC:3.6.3.54]+ko01524//Platinum drug resistance	XM_014429645.1 PREDICTED: Halyomorpha halys copper-transporting ATPase 1 (LOC106686373), transcript variant X4, mRNA	PREDICTED: copper-transporting ATPase 1 isoform X1 [Bemisia tabaci]	Heavy-metal-associated domain	[P] KOG0207 Cation transport ATPase	Copper-transporting ATPase 1 OS=Homo sapiens GN=ATP7A PE=1 SV=3
CL1944.Contig2_All	0	0.033	5.48552	8.19884e-07	9.89387e-07		K11577//kinetochore-associated protein 1;K11577//kinetochore-associated protein 1;K11577//kinetochore-associated protein 1;K11577//kinetochore-associated protein 1;K11577//kinetochore-associated protein 1		PREDICTED: uncharacterized protein LOC109043830 [Bemisia tabaci]	Rough deal protein C-terminal region	[D] KOG4256 Kinetochore component	Kinetochore-associated protein rod-1 OS=Caenorhabditis elegans GN=rod-1 PE=1 SV=1
CL1949.Contig1_All	0	0.533	7.23101	3.67597e-18	2.5612e-18		K15180//negative elongation factor B;K15180//negative elongation factor B;K15180//negative elongation factor B;K15180//negative elongation factor B	XM_022060233.1 PREDICTED: Zootermopsis nevadensis negative elongation factor B (LOC110828002), mRNA	PREDICTED: negative elongation factor B [Bemisia tabaci]	Cofactor of BRCA1 (COBRA1)		Negative elongation factor B OS=Drosophila melanogaster GN=NELF-B PE=1 SV=1	GO:0045892//negative regulation of transcription, DNA-templated;GO:0005634//nucleus;GO:0003746//translation elongation factor activity
CL1953.Contig1_All	0.256	1.69	2.72001	5.23566e-35	2.31508e-35		K07936//GTP-binding nuclear protein Ran+ko03013//RNA transport+ko03008//Ribosome biogenesis in eukaryotes+ko05166//Human T-cell leukemia virus 1 infection		PREDICTED: protein takeout-like [Diuraphis noxia]	Haemolymph juvenile hormone binding protein (JHBP)		Protein takeout OS=Drosophila melanogaster GN=to PE=2 SV=1
CL1955.Contig1_All	1.05	2.71	1.34706	7.61964e-21	4.83599e-21		K17767//AH receptor-interacting protein+ko04934//Cushing syndrome;K17767//AH receptor-interacting protein+ko04934//Cushing syndrome;K17767//AH receptor-interacting protein+ko04934//Cushing syndrome;K17767//AH receptor-interacting protein+ko04934//Cushing syndrome;K17767//AH receptor-interacting protein+ko04934//Cushing syndrome		PREDICTED: AH receptor-interacting protein, partial [Anoplophora glabripennis]	FKBP-type peptidyl-prolyl cis-trans isomerase	[O] KOG0545 Aryl-hydrocarbon receptor-interacting protein	AH receptor-interacting protein OS=Mus musculus GN=Aip PE=1 SV=1
CL1956.Contig4_All	0	0.376	8.88449	7.65218e-46	2.74897e-46		K17493//calmodulin-regulated spectrin-associated protein;K17493//calmodulin-regulated spectrin-associated protein;K17493//calmodulin-regulated spectrin-associated protein;K17493//calmodulin-regulated spectrin-associated protein;K17493//calmodulin-regulated spectrin-associated protein	XM_001972631.2 Drosophila erecta uncharacterized protein (Dere\GG15651), mRNA	PREDICTED: patronin isoform X5 [Bemisia tabaci]	Microtubule-binding calmodulin-regulated spectrin-associated	[Z] KOG3654 Uncharacterized CH domain protein	Calmodulin-regulated spectrin-associated protein 1 OS=Xenopus laevis GN=camsap1 PE=2 SV=1
CL1957.Contig1_All	0.746	2.786	1.90828	1.95289e-29	9.8218e-30		K20779//E3 ubiquitin-protein ligase RNF168 [EC:2.3.2.31];K20779//E3 ubiquitin-protein ligase RNF168 [EC:2.3.2.31];K20779//E3 ubiquitin-protein ligase RNF168 [EC:2.3.2.31];K20779//E3 ubiquitin-protein ligase RNF168 [EC:2.3.2.31];K20779//E3 ubiquitin-protein ligase RNF168 [EC:2.3.2.31]		PREDICTED: E3 ubiquitin-protein ligase RNF168-like [Aethina tumida]	Zinc finger, C3HC4 type (RING finger)	[O] KOG4159 Predicted E3 ubiquitin ligase	E3 ubiquitin-protein ligase RNF168 OS=Homo sapiens GN=RNF168 PE=1 SV=1
CL196.Contig2_All	11.64	25.106	1.10946	4.69459e-160	5.4243e-161		K00507//stearoyl-CoA desaturase (Delta-9 desaturase) [EC:1.14.19.1]+ko03320//PPAR signaling pathway+ko01040//Biosynthesis of unsaturated fatty acids+ko04212//Longevity regulating pathway - worm+ko04152//AMPK signaling pathway+ko01212//Fatty acid metabolism;K00507//stearoyl-CoA desaturase (Delta-9 desaturase) [EC:1.14.19.1]+ko03320//PPAR signaling pathway+ko01040//Biosynthesis of unsaturated fatty…		PREDICTED: acyl-CoA Delta(11) desaturase [Bemisia tabaci]		[I] KOG1600 Fatty acid desaturase	Acyl-CoA desaturase 4 OS=Mus musculus GN=Scd4 PE=1 SV=1	GO:0016021//integral component of membrane;GO:0006633//fatty acid biosynthetic process;GO:0016717//oxidoreductase activity, acting on paired donors, with oxidation of a pair of donors resulting in the reduction of molecular oxygen to two molecules of water
CL196.Contig3_All	6.783	19.39	1.51202	2.95492e-213	2.53095e-214		K00507//stearoyl-CoA desaturase (Delta-9 desaturase) [EC:1.14.19.1]+ko03320//PPAR signaling pathway+ko01040//Biosynthesis of unsaturated fatty acids+ko04212//Longevity regulating pathway - worm+ko04152//AMPK signaling pathway+ko01212//Fatty acid metabolism;K00507//stearoyl-CoA desaturase (Delta-9 desaturase) [EC:1.14.19.1]+ko03320//PPAR signaling pathway+ko01040//Biosynthesis of unsaturated fatty…		PREDICTED: acyl-CoA Delta(11) desaturase [Bemisia tabaci]		[I] KOG1600 Fatty acid desaturase	Acyl-CoA desaturase 4 OS=Mus musculus GN=Scd4 PE=1 SV=1	GO:0016021//integral component of membrane;GO:0006633//fatty acid biosynthetic process;GO:0016717//oxidoreductase activity, acting on paired donors, with oxidation of a pair of donors resulting in the reduction of molecular oxygen to two molecules of water
CL1969.Contig1_All	1.143	4.18	1.87401	1.44667e-70	3.61511e-71	TF_bZIP	K16464//centrosomal protein CEP250;K10388//plectin;K11515//inner centromere protein;K19533//synaptonemal complex protein 1;K16471//Fas-binding factor 1		PREDICTED: uncharacterized protein CG10915 isoform X2 [Bemisia tabaci]	Cortactin-binding protein-2	[Y] TWOG0106 Nuclear pore membrane and/or filament interacting like (POMFIL) protein	Uncharacterized protein CG10915 OS=Drosophila melanogaster GN=CG10915 PE=1 SV=1
CL1978.Contig2_All	0.006	0.106	3.72533	8.01858e-05	0.000114387		K12298//bile salt-stimulated lipase [EC:3.1.1.3 3.1.1.13]+ko04975//Fat digestion and absorption+ko04972//Pancreatic secretion+ko00100//Steroid biosynthesis+ko00561//Glycerolipid metabolism+ko01100//Metabolic pathways;K03927//carboxylesterase 2 [EC:3.1.1.1 3.1.1.84 3.1.1.56]+ko00983//Drug metabolism - other enzymes;K01049//acetylcholinesterase [EC:3.1.1.7]+ko04725//Cholinergic synapse+ko00564//Gly…		carboxylesterase [Aphis gossypii]	Carboxylesterase family	[R] KOG1516 Carboxylesterase and related proteins	Esterase FE4 OS=Myzus persicae PE=1 SV=1
CL1980.Contig1_All	0.73	1.686	1.20287	5.84768e-20	3.83532e-20		K04599//G protein-coupled receptor Mth (Methuselah protein);K04599//G protein-coupled receptor Mth (Methuselah protein);K04599//G protein-coupled receptor Mth (Methuselah protein)		PREDICTED: probable G-protein coupled receptor Mth-like 3 [Diuraphis noxia] >XP_015373469.1 PREDICTED: probable G-protein coupled receptor Mth-like 3 [Diuraphis noxia]	Methuselah N-terminus	[T] KOG4193 G protein-coupled receptors	Probable G-protein coupled receptor Mth-like 3 OS=Drosophila melanogaster GN=mthl3 PE=1 SV=3	GO:0006950//response to stress;GO:0016021//integral component of membrane;GO:0007166//cell surface receptor signaling pathway;GO:0004930//G-protein coupled receptor activity
CL1986.Contig1_All	0.02	0.833	5.31477	5.16213e-20	3.37391e-20
CL1986.Contig2_All	0	0.42	5.72592	8.91972e-08	1.00677e-07
CL1986.Contig4_All	0	0.83	6.36565	4.0031e-11	3.72594e-11
CL1986.Contig5_All	0.133	1.733	3.67899	1.35725e-31	6.48972e-32
CL1986.Contig6_All	0.016	2.23	6.96772	1.3417e-57	3.9624e-58
CL199.Contig10_All	0.02	1.276	5.86699	2.72302e-89	5.48749e-90	ZBTB	K09237//tramtrack+ko04013//MAPK signaling pathway - fly;K09237//tramtrack+ko04013//MAPK signaling pathway - fly;K09237//tramtrack+ko04013//MAPK signaling pathway - fly;K09237//tramtrack+ko04013//MAPK signaling pathway - fly;K09237//tramtrack+ko04013//MAPK signaling pathway - fly	XM_014353593.1 PREDICTED: Copidosoma floridanum protein tramtrack, alpha isoform-like (LOC106639812), transcript variant X2, mRNA	PREDICTED: protein tramtrack, alpha isoform-like isoform X2 [Linepithema humile]	BTB/POZ domain	[T] KOG1187 Serine/threonine protein kinase	Sex determination protein fruitless OS=Drosophila melanogaster GN=fru PE=1 SV=1
CL1992.Contig1_All	0	0.48	7.11853	4.85263e-17	3.52502e-17		K14999//cytochrome P450 family 6 [EC:1.14.-.-];K14999//cytochrome P450 family 6 [EC:1.14.-.-];K14999//cytochrome P450 family 6 [EC:1.14.-.-];K14999//cytochrome P450 family 6 [EC:1.14.-.-];K14999//cytochrome P450 family 6 [EC:1.14.-.-]		cytochrome P450 6BQ10 [Tribolium castaneum] >XP_015834314.1 PREDICTED: cytochrome P450 6BQ10 isoform X1 [Tribolium castaneum] >EFA02823.1 cytochrome P450 6BQ10 [Tribolium castaneum]	Cytochrome P450	[Q] KOG0158 Cytochrome P450 CYP3/CYP5/CYP6/CYP9 subfamilies	Probable cytochrome P450 6a13 OS=Drosophila melanogaster GN=Cyp6a13 PE=2 SV=1	GO:0016705//oxidoreductase activity, acting on paired donors, with incorporation or reduction of molecular oxygen;GO:0020037//heme binding;GO:0005506//iron ion binding;GO:0016021//integral component of membrane;GO:0004497//monooxygenase activity
CL1996.Contig3_All	0.82	1.746	1.10317	5.80141e-18	4.06919e-18		K20703//FAS-associated factor 1+ko04217//Necroptosis+ko04624//Toll and Imd signaling pathway;K20703//FAS-associated factor 1+ko04217//Necroptosis+ko04624//Toll and Imd signaling pathway;K20703//FAS-associated factor 1+ko04217//Necroptosis+ko04624//Toll and Imd signaling pathway;K20703//FAS-associated factor 1+ko04217//Necroptosis+ko04624//Toll and Imd signaling pathway;K20703//FAS-associated fact…		FAS-associated factor 1 [Locusta migratoria manilensis]	UBX domain	[T] KOG1363 Predicted regulator of the ubiquitin pathway (contains UAS and UBX domains)	FAS-associated factor 1 OS=Homo sapiens GN=FAF1 PE=1 SV=2
CL1996.Contig5_All	0.51	1.04	1.02718	1.85171e-14	1.48801e-14		K20703//FAS-associated factor 1+ko04217//Necroptosis+ko04624//Toll and Imd signaling pathway;K20703//FAS-associated factor 1+ko04217//Necroptosis+ko04624//Toll and Imd signaling pathway;K20703//FAS-associated factor 1+ko04217//Necroptosis+ko04624//Toll and Imd signaling pathway;K20703//FAS-associated factor 1+ko04217//Necroptosis+ko04624//Toll and Imd signaling pathway;K20703//FAS-associated fact…	XM_013313853.1 PREDICTED: Papilio xuthus protein SDA1 homolog (LOC106119020), mRNA	PREDICTED: uncharacterized protein LOC107398159 [Tribolium castaneum]	Predicted AAA-ATPase	[T] KOG1363 Predicted regulator of the ubiquitin pathway (contains UAS and UBX domains)
CL20.Contig2_All	0	1.163	9.95255	5.85841e-82	1.2914e-82		K19930//SRC kinase signaling inhibitor 1;K19930//SRC kinase signaling inhibitor 1;K19930//SRC kinase signaling inhibitor 1;K19930//SRC kinase signaling inhibitor 1;K19930//SRC kinase signaling inhibitor 1	LT635621.1 Plasmodium vivax genome assembly, chromosome: 10	PREDICTED: coiled-coil domain-containing protein AGAP005037 [Bemisia tabaci]	Actin interacting protein 3		Coiled-coil domain-containing protein CG32809 OS=Drosophila melanogaster GN=CG32809 PE=2 SV=1
CL2009.Contig11_All	0.34	0.903	1.39426	9.04175e-16	6.90122e-16	zf-C2H2	K14000//ribosome-binding protein 1+ko04141//Protein processing in endoplasmic reticulum;K14000//ribosome-binding protein 1+ko04141//Protein processing in endoplasmic reticulum;K14000//ribosome-binding protein 1+ko04141//Protein processing in endoplasmic reticulum;K14000//ribosome-binding protein 1+ko04141//Protein processing in endoplasmic reticulum;K14000//ribosome-binding protein 1+ko04141//Pro…		kinectin isoform X3 [Bombus terrestris]	TATA element modulatory factor 1 TATA binding	[Z] KOG0161 Myosin class II heavy chain	Ribosome-binding protein 1 OS=Mus musculus GN=Rrbp1 PE=1 SV=2
CL2009.Contig1_All	0	1.403	10.016	8.60363e-85	1.83295e-85	zf-C2H2	K14000//ribosome-binding protein 1+ko04141//Protein processing in endoplasmic reticulum;K14000//ribosome-binding protein 1+ko04141//Protein processing in endoplasmic reticulum;K14000//ribosome-binding protein 1+ko04141//Protein processing in endoplasmic reticulum;K14000//ribosome-binding protein 1+ko04141//Protein processing in endoplasmic reticulum	AC073533.19 Homo sapiens X BAC RP11-589J20 (Roswell Park Cancer Institute Human BAC Library) complete sequence	ribosome-binding protein 1 [Nilaparvata lugens]	TPR/MLP1/MLP2-like protein	[J] LSE3605 H Ribosome binding protein	Ribosome-binding protein 1 OS=Mus musculus GN=Rrbp1 PE=1 SV=2	GO:0016021//integral component of membrane
CL2009.Contig4_All	5.346	11.356	1.07938	9.88271e-214	8.44328e-215	zf-C2H2	K14000//ribosome-binding protein 1+ko04141//Protein processing in endoplasmic reticulum;K14000//ribosome-binding protein 1+ko04141//Protein processing in endoplasmic reticulum;K14000//ribosome-binding protein 1+ko04141//Protein processing in endoplasmic reticulum;K14000//ribosome-binding protein 1+ko04141//Protein processing in endoplasmic reticulum;K14000//ribosome-binding protein 1+ko04141//Pro…	LT594630.1 Plasmodium malariae genome assembly, chromosome: 9	ribosome-binding protein 1 [Nilaparvata lugens]	TPR/MLP1/MLP2-like protein	[J] LSE3605 H Ribosome binding protein	Ribosome-binding protein 1 OS=Mus musculus GN=Rrbp1 PE=1 SV=2
CL2009.Contig6_All	4.323	9.663	1.15171	1.65632e-201	1.5123e-202	zf-C2H2	K14000//ribosome-binding protein 1+ko04141//Protein processing in endoplasmic reticulum;K14000//ribosome-binding protein 1+ko04141//Protein processing in endoplasmic reticulum;K14000//ribosome-binding protein 1+ko04141//Protein processing in endoplasmic reticulum;K14000//ribosome-binding protein 1+ko04141//Protein processing in endoplasmic reticulum;K14000//ribosome-binding protein 1+ko04141//Pro…	LT594630.1 Plasmodium malariae genome assembly, chromosome: 9	ribosome-binding protein 1 [Nilaparvata lugens]	TPR/MLP1/MLP2-like protein	[J] LSE3605 H Ribosome binding protein	Ribosome-binding protein 1 OS=Mus musculus GN=Rrbp1 PE=1 SV=2
CL2009.Contig8_All	0.673	1.796	1.46757	0.000694211	0.00109746
CL2010.Contig1_All	1.45	2.976	1.0407	5.27707e-26	2.89322e-26		K13356//alcohol-forming fatty acyl-CoA reductase [EC:1.2.1.84]+ko04146//Peroxisome+ko04212//Longevity regulating pathway - worm+ko00073//Cutin, suberine and wax biosynthesis;K13356//alcohol-forming fatty acyl-CoA reductase [EC:1.2.1.84]+ko04146//Peroxisome+ko04212//Longevity regulating pathway - worm+ko00073//Cutin, suberine and wax biosynthesis;K13356//alcohol-forming fatty acyl-CoA reductase [E…		fatty acyl-CoA reductase I [Phenacoccus solenopsis]	Male sterility protein	[I] KOG1221 Acyl-CoA reductase	Fatty acyl-CoA reductase wat OS=Drosophila melanogaster GN=wat PE=1 SV=1	GO:0080019//fatty-acyl-CoA reductase (alcohol-forming) activity;GO:0016021//integral component of membrane;GO:0102965//alcohol-forming fatty acyl-CoA reductase activity;GO:0006629//lipid metabolic process
CL2013.Contig2_All	7.71	17.893	1.22273	7.75522e-103	1.37487e-103		K01082//3'(2'), 5'-bisphosphate nucleotidase [EC:3.1.3.7]+ko00920//Sulfur metabolism+ko01100//Metabolic pathways;K01082//3'(2'), 5'-bisphosphate nucleotidase [EC:3.1.3.7]+ko00920//Sulfur metabolism+ko01100//Metabolic pathways;K01082//3'(2'), 5'-bisphosphate nucleotidase [EC:3.1.3.7]+ko00920//Sulfur metabolism+ko01100//Metabolic pathways;K01082//3'(2'), 5'-bisphosphate nucleotidase [EC:3.1.3.7]+ko…		PREDICTED: 3'(2'),5'-bisphosphate nucleotidase 1 [Microplitis demolitor]	Inositol monophosphatase family	[F] KOG3099 Bisphosphate 3'-nucleotidase BPNT1/Inositol polyphosphate 1-phosphatase	3'(2'),5'-bisphosphate nucleotidase 1 OS=Homo sapiens GN=BPNT1 PE=1 SV=1	GO:0008441//3'(2'),5'-bisphosphate nucleotidase activity;GO:0046854//phosphatidylinositol phosphorylation
CL202.Contig5_All	0.253	0.783	1.63737	2.81342e-15	2.19386e-15	bHLH	K02223//circadian locomoter output cycles kaput protein [EC:2.3.1.48]+ko04728//Dopaminergic synapse+ko04711//Circadian rhythm - fly+ko04710//Circadian rhythm+ko05168//Herpes simplex infection;K02223//circadian locomoter output cycles kaput protein [EC:2.3.1.48]+ko04728//Dopaminergic synapse+ko04711//Circadian rhythm - fly+ko04710//Circadian rhythm+ko05168//Herpes simplex infection;K02223//circadi…		PREDICTED: circadian locomoter output cycles protein kaput-like isoform X1 [Halyomorpha halys]	PAS domain	[K] KOG3561 Aryl-hydrocarbon receptor nuclear translocator	Circadian locomoter output cycles protein kaput OS=Drosophila melanogaster GN=Clk PE=1 SV=3
CL202.Contig7_All	0.116	0.76	2.67167	1.01308e-26	5.45191e-27	bHLH	K02223//circadian locomoter output cycles kaput protein [EC:2.3.1.48]+ko04728//Dopaminergic synapse+ko04711//Circadian rhythm - fly+ko04710//Circadian rhythm+ko05168//Herpes simplex infection;K02223//circadian locomoter output cycles kaput protein [EC:2.3.1.48]+ko04728//Dopaminergic synapse+ko04711//Circadian rhythm - fly+ko04710//Circadian rhythm+ko05168//Herpes simplex infection;K02223//circadi…		PREDICTED: circadian locomoter output cycles protein kaput-like isoform X2 [Halyomorpha halys]	PAS domain	[K] KOG3561 Aryl-hydrocarbon receptor nuclear translocator	Circadian locomoter output cycles protein kaput OS=Drosophila melanogaster GN=Clk PE=1 SV=3
CL202.Contig8_All	0	0.696	8.2605	1.99275e-32	9.33995e-33	bHLH	K02223//circadian locomoter output cycles kaput protein [EC:2.3.1.48]+ko04728//Dopaminergic synapse+ko04711//Circadian rhythm - fly+ko04710//Circadian rhythm+ko05168//Herpes simplex infection;K02223//circadian locomoter output cycles kaput protein [EC:2.3.1.48]+ko04728//Dopaminergic synapse+ko04711//Circadian rhythm - fly+ko04710//Circadian rhythm+ko05168//Herpes simplex infection;K02223//circadi…		PREDICTED: circadian locomoter output cycles protein kaput [Orussus abietinus]	PAS domain	[K] KOG3561 Aryl-hydrocarbon receptor nuclear translocator	Circadian locomoter output cycles protein kaput OS=Drosophila melanogaster GN=Clk PE=1 SV=3
CL2023.Contig5_All	0	0.123	5.84443	2.64379e-08	2.88116e-08		K00111//glycerol-3-phosphate dehydrogenase [EC:1.1.5.3]+ko00564//Glycerophospholipid metabolism;K00111//glycerol-3-phosphate dehydrogenase [EC:1.1.5.3]+ko00564//Glycerophospholipid metabolism;K00111//glycerol-3-phosphate dehydrogenase [EC:1.1.5.3]+ko00564//Glycerophospholipid metabolism;K00111//glycerol-3-phosphate dehydrogenase [EC:1.1.5.3]+ko00564//Glycerophospholipid metabolism;K00111//glycero…	EF092053.1 Maconellicoccus hirsutus clone WHMH4391 putative glycerol-3-phosphate dehydrogenase mRNA, partial cds	PREDICTED: glycerol-3-phosphate dehydrogenase, mitochondrial [Bemisia tabaci]	FAD dependent oxidoreductase	[C] KOG0042 Glycerol-3-phosphate dehydrogenase	Glycerol-3-phosphate dehydrogenase, mitochondrial OS=Mus musculus GN=Gpd2 PE=1 SV=2
CL2024.Contig2_All	0.326	0.676	1.05604	8.35359e-08	9.40144e-08	zf-C2HC	K18626//trichohyalin;K19538//retinitis pigmentosa 1;K18626//trichohyalin;K22156//protein Jade-3;K22017//mucin-4	LT571452.1 Pongo pygmaeus genome assembly, chromosome: XII	hypothetical protein M513_13134 [Trichuris suis]	Resistance to inhibitors of cholinesterase homologue 3	[Y] KOG2992 Nucleolar GTPase/ATPase p130	Glutamic acid-rich protein OS=Plasmodium falciparum (isolate FC27 / Papua New Guinea) GN=GARP PE=4 SV=1
CL2024.Contig3_All	0.146	0.536	1.86267	4.60059e-11	4.29455e-11	zf-C2HC	K00476//aspartate beta-hydroxylase [EC:1.14.11.16];K18626//trichohyalin;K19538//retinitis pigmentosa 1;K18626//trichohyalin	LT594489.1 Plasmodium malariae genome assembly, chromosome: 1	hypothetical protein TRFO_21743 [Tritrichomonas foetus]	Resistance to inhibitors of cholinesterase homologue 3	[K] KOG3149 Transcription initiation factor IIF, auxiliary subunit	Glutamic acid-rich protein OS=Plasmodium falciparum (isolate FC27 / Papua New Guinea) GN=GARP PE=4 SV=1
CL2025.Contig1_All	0.693	15.423	4.48282	0	0		K12828//splicing factor 3B subunit 1+ko03040//Spliceosome;K12828//splicing factor 3B subunit 1+ko03040//Spliceosome;K12828//splicing factor 3B subunit 1+ko03040//Spliceosome;K12828//splicing factor 3B subunit 1+ko03040//Spliceosome;K12828//splicing factor 3B subunit 1+ko03040//Spliceosome	XM_011181613.1 PREDICTED: Bactrocera cucurbitae splicing factor 3B subunit 1 (LOC105210575), mRNA	PREDICTED: splicing factor 3B subunit 1 isoform X1 [Apis mellifera] >XP_003698871.1 PREDICTED: splicing factor 3B subunit 1 isoform X1 [Apis florea] >XP_006617555.1 PREDICTED: splicing factor 3B subunit 1-like [Apis dorsata] >XP_016912761.1 PREDICTED: splicing factor 3B subunit 1 [Apis cerana]	Splicing factor 3B subunit 1	[A] KOG0213 Splicing factor 3b, subunit 1	Splicing factor 3B subunit 1 OS=Homo sapiens GN=SF3B1 PE=1 SV=3
CL2027.Contig1_All	0.476	1.623	1.76491	1.72813e-14	1.38739e-14		K03259//translation initiation factor 4E+ko04211//Longevity regulating pathway+ko01521//EGFR tyrosine kinase inhibitor resistance+ko04910//Insulin signaling pathway+ko03013//RNA transport+ko04151//PI3K-Akt signaling pathway+ko04150//mTOR signaling pathway+ko04066//HIF-1 signaling pathway;K03259//translation initiation factor 4E+ko04211//Longevity regulating pathway+ko01521//EGFR tyrosine kinase i…		PREDICTED: eukaryotic translation initiation factor 4E-1A isoform X2 [Harpegnathos saltator]	Eukaryotic initiation factor 4E	[J] KOG1670 Translation initiation factor 4F, cap-binding subunit (eIF-4E) and related cap-binding proteins	Eukaryotic translation initiation factor 4E OS=Xenopus laevis GN=eif4e PE=1 SV=1
CL203.Contig10_All	0	0.583	9.75126	1.52884e-73	3.68251e-74	zf-C2H2	K20049//low-density lipoprotein receptor-related protein 1B;K09640//transmembrane protease serine 9 [EC:3.4.21.-];K09640//transmembrane protease serine 9 [EC:3.4.21.-];K09640//transmembrane protease serine 9 [EC:3.4.21.-];K09640//transmembrane protease serine 9 [EC:3.4.21.-]		PREDICTED: serine protease nudel [Apis cerana]	Trypsin	[T] KOG1215 Low-density lipoprotein receptors containing Ca2+-binding EGF-like domains	Prolow-density lipoprotein receptor-related protein 1 OS=Homo sapiens GN=LRP1 PE=1 SV=2	GO:0007313//maternal specification of dorsal/ventral axis, oocyte, soma encoded;GO:0004252//serine-type endopeptidase activity;GO:0007306//eggshell chorion assembly;GO:0016021//integral component of membrane
CL203.Contig4_All	2.336	5.1	1.1147	2.26958e-171	2.44967e-172	zf-C2H2	K20049//low-density lipoprotein receptor-related protein 1B;K09640//transmembrane protease serine 9 [EC:3.4.21.-];K09640//transmembrane protease serine 9 [EC:3.4.21.-];K09640//transmembrane protease serine 9 [EC:3.4.21.-];K09640//transmembrane protease serine 9 [EC:3.4.21.-]		PREDICTED: serine protease nudel [Apis cerana]	Trypsin	[T] KOG1215 Low-density lipoprotein receptors containing Ca2+-binding EGF-like domains	Prolow-density lipoprotein receptor-related protein 1 OS=Homo sapiens GN=LRP1 PE=1 SV=2	GO:0007313//maternal specification of dorsal/ventral axis, oocyte, soma encoded;GO:0004252//serine-type endopeptidase activity;GO:0007306//eggshell chorion assembly;GO:0016021//integral component of membrane
CL203.Contig9_All	0.113	0.493	2.13058	0.000416027	0.000639914
CL2030.Contig1_All	0.01	0.416	5.57459	4.5494e-27	2.42207e-27		K01273//membrane dipeptidase [EC:3.4.13.19];K01273//membrane dipeptidase [EC:3.4.13.19];K01273//membrane dipeptidase [EC:3.4.13.19]		PREDICTED: dipeptidase 1-like [Agrilus planipennis]	Tissue factor			GO:0046872//metal ion binding;GO:0008237//metallopeptidase activity;GO:0031225//anchored component of membrane;GO:0016805//dipeptidase activity
CL2037.Contig3_All	1.226	3.203	1.39524	3.90209e-38	1.61937e-38		K14717//solute carrier family 39 (zinc transporter), member 11;K14717//solute carrier family 39 (zinc transporter), member 11;K14717//solute carrier family 39 (zinc transporter), member 11;K14717//solute carrier family 39 (zinc transporter), member 11;K14717//solute carrier family 39 (zinc transporter), member 11		PREDICTED: zinc transporter ZIP11 isoform X2 [Agrilus planipennis]	ZIP Zinc transporter	[P] KOG2474 Zinc transporter and related ZIP domain-containing proteins	Zinc transporter ZIP11 OS=Xenopus tropicalis GN=slc39a11 PE=2 SV=1	GO:0046873//metal ion transmembrane transporter activity;GO:0016021//integral component of membrane
CL2038.Contig2_All	0.31	0.78	1.30737	2.46215e-09	2.52344e-09	zf-C2H2	K09228//KRAB domain-containing zinc finger protein;K09228//KRAB domain-containing zinc finger protein;K09228//KRAB domain-containing zinc finger protein;K09228//KRAB domain-containing zinc finger protein;K09228//KRAB domain-containing zinc finger protein	XM_021935205.1 PREDICTED: Papio anubis zinc finger protein 92 (LOC101013768), mRNA	PREDICTED: LOW QUALITY PROTEIN: zinc finger protein 91 isoform X1 [Cricetulus griseus]	Zinc-finger double domain	[R] KOG1721 FOG: Zn-finger	Zinc finger protein 813 OS=Homo sapiens GN=ZNF813 PE=2 SV=2
CL2040.Contig1_All	1.87	4.43	1.24636	5.86073e-59	1.69579e-59		K00507//stearoyl-CoA desaturase (Delta-9 desaturase) [EC:1.14.19.1]+ko03320//PPAR signaling pathway+ko01040//Biosynthesis of unsaturated fatty acids+ko04212//Longevity regulating pathway - worm+ko04152//AMPK signaling pathway+ko01212//Fatty acid metabolism;K00507//stearoyl-CoA desaturase (Delta-9 desaturase) [EC:1.14.19.1]+ko03320//PPAR signaling pathway+ko01040//Biosynthesis of unsaturated fatty…	XM_022310789.1 PREDICTED: Myzus persicae acyl-CoA Delta(11) desaturase-like (LOC111031013), transcript variant X3, mRNA	Acyl-CoA Delta(11) desaturase [Zootermopsis nevadensis]	Fatty acid desaturase	[I] KOG1600 Fatty acid desaturase	Acyl-CoA Delta(11) desaturase OS=Trichoplusia ni GN=D11DS PE=1 SV=2	GO:0016021//integral component of membrane;GO:0006633//fatty acid biosynthetic process;GO:0016717//oxidoreductase activity, acting on paired donors, with oxidation of a pair of donors resulting in the reduction of molecular oxygen to two molecules of water
CL2049.Contig1_All	1.386	2.886	1.04559	4.77845e-37	2.02357e-37		K18621//actin-binding protein anillin;K18621//actin-binding protein anillin;K18621//actin-binding protein anillin;K18621//actin-binding protein anillin		anillin-like isoform X2 [Nilaparvata lugens]	Cell division protein anillin	[DZ] KOG3640 Actin binding protein Anillin	Anillin OS=Drosophila melanogaster GN=scra PE=1 SV=3
CL2049.Contig3_All	2.213	5.276	1.24145	2.19839e-84	4.70504e-85		K18621//actin-binding protein anillin;K18621//actin-binding protein anillin;K18621//actin-binding protein anillin;K18621//actin-binding protein anillin		PREDICTED: actin-binding protein anillin-like [Bemisia tabaci]	Cell division protein anillin	[DZ] KOG3640 Actin binding protein Anillin	Anillin OS=Drosophila melanogaster GN=scra PE=1 SV=3
CL2051.Contig2_All	2.116	7.203	1.76346	7.5572e-166	8.37864e-167		K21843//tetratricopeptide repeat protein 7;K21843//tetratricopeptide repeat protein 7;K21843//tetratricopeptide repeat protein 7;K21843//tetratricopeptide repeat protein 7;K21843//tetratricopeptide repeat protein 7		PREDICTED: tetratricopeptide repeat protein 7B isoform X1 [Cimex lectularius]	Tetratricopeptide repeat	[T] KOG4162 Predicted calmodulin-binding protein	Tetratricopeptide repeat protein 7B OS=Mus musculus GN=Ttc7b PE=1 SV=1
CL2051.Contig3_All	5.593	16.496	1.55392	1.2816e-183	1.28857e-184		K08964//methylthioribulose-1-phosphate dehydratase [EC:4.2.1.109]+ko01100//Metabolic pathways+ko00270//Cysteine and methionine metabolism;K08964//methylthioribulose-1-phosphate dehydratase [EC:4.2.1.109]+ko01100//Metabolic pathways+ko00270//Cysteine and methionine metabolism;K08964//methylthioribulose-1-phosphate dehydratase [EC:4.2.1.109]+ko01100//Metabolic pathways+ko00270//Cysteine and methion…		PREDICTED: methylthioribulose-1-phosphate dehydratase [Aethina tumida]	Class II Aldolase and Adducin N-terminal domain	[G] KOG2631 Class II aldolase/adducin N-terminal domain protein	Methylthioribulose-1-phosphate dehydratase OS=Lithobates catesbeiana GN=apip PE=2 SV=1
CL2053.Contig1_All	0	0.143	4.51222	0.000436278	0.000672201	Homeobox	K19607//X-linked retinitis pigmentosa GTPase regulator;K19607//X-linked retinitis pigmentosa GTPase regulator;K19607//X-linked retinitis pigmentosa GTPase regulator;K00476//aspartate beta-hydroxylase [EC:1.14.11.16]		PREDICTED: uncharacterized protein LOC109524759 [Hippocampus comes]	Protein of unknown function (DUF1510)	[GO] KOG4157 beta-1,6-N-acetylglucosaminyltransferase, contains WSC domain	Acidic leucine-rich nuclear phosphoprotein 32 family member B OS=Homo sapiens GN=ANP32B PE=1 SV=1	GO:0005623//cell;GO:0045454//cell redox homeostasis
CL2057.Contig1_All	0.01	0.74	6.17912	2.13715e-18	1.4758e-18		K17094//annexin A6;K17094//annexin A6;K17094//annexin A6;K17094//annexin A6;K17094//annexin A6		PREDICTED: annexin A6 isoform X1 [Marmota marmota marmota]	Annexin	[U] KOG0819 Annexin	Annexin A6 OS=Gallus gallus GN=ANXA6 PE=2 SV=1	GO:0015276//ligand-gated ion channel activity;GO:0005544//calcium-dependent phospholipid binding;GO:0097190//apoptotic signaling pathway;GO:0015485//cholesterol binding;GO:0051260//protein homooligomerization;GO:0006937//regulation of muscle contraction;GO:0051560//mitochondrial calcium ion homeostasis;GO:0005739//mitochondrion;GO:0048306//calcium-dependent protein binding;GO:0070062//extracellul…
CL2064.Contig3_All	0.586	2.026	1.78473	9.89638e-31	4.82126e-31		K05631//atrophin-1 interacting protein 3 (BAI1-associated protein 1)+ko04530//Tight junction+ko04151//PI3K-Akt signaling pathway+ko04015//Rap1 signaling pathway+ko05165//Human papillomavirus infection;K00485//dimethylaniline monooxygenase (N-oxide forming) [EC:1.14.13.8]+ko00982//Drug metabolism - cytochrome P450;K00485//dimethylaniline monooxygenase (N-oxide forming) [EC:1.14.13.8]+ko00982//Drug…		flavin-containing monooxygenase FMO GS-OX5-like isoform X1 [Nilaparvata lugens] >XP_022193189.1 flavin-containing monooxygenase FMO GS-OX5-like isoform X1 [Nilaparvata lugens] >XP_022193190.1 flavin-containing monooxygenase FMO GS-OX5-like isoform X1 [Nilaparvata lugens]	Flavin-binding monooxygenase-like	[Q] KOG1399 Flavin-containing monooxygenase	Dimethylaniline monooxygenase [N-oxide-forming] 5 OS=Homo sapiens GN=FMO5 PE=1 SV=2
CL207.Contig5_All	0.133	0.61	2.20682	3.02297e-21	1.89494e-21		K08334//beclin+ko04140//Autophagy - animal+ko04215//Apoptosis - multiple species+ko04137//Mitophagy - animal+ko04136//Autophagy - other+ko04371//Apelin signaling pathway+ko05167//Kaposi sarcoma-associated herpesvirus infection;K08334//beclin+ko04140//Autophagy - animal+ko04215//Apoptosis - multiple species+ko04137//Mitophagy - animal+ko04136//Autophagy - other+ko04371//Apelin signaling pathway+ko…	XM_015662842.1 PREDICTED: Neodiprion lecontei beclin-1-like protein (LOC107223218), transcript variant X2, mRNA	beclin-1-like protein [Zootermopsis nevadensis] >KDR18549.1 Beclin-1-like protein [Zootermopsis nevadensis]	Autophagy protein Apg6	[T] KOG2751 Beclin-like protein	Beclin-1-like protein OS=Drosophila melanogaster GN=Atg6 PE=1 SV=1
CL2084.Contig1_All	1.436	3.923	1.44983	9.00514e-97	1.68944e-97		K01897//long-chain acyl-CoA synthetase [EC:6.2.1.3]+ko03320//PPAR signaling pathway+ko04146//Peroxisome+ko04216//Ferroptosis+ko04714//Thermogenesis+ko00061//Fatty acid biosynthesis+ko01100//Metabolic pathways+ko01212//Fatty acid metabolism+ko00071//Fatty acid degradation+ko04920//Adipocytokine signaling pathway;K01897//long-chain acyl-CoA synthetase [EC:6.2.1.3]+ko03320//PPAR signaling pathway+ko…	XM_014404560.1 PREDICTED: Cimex lectularius long-chain-fatty-acid--CoA ligase 4-like (LOC106672825), transcript variant X4, mRNA	long chain acyl-CoA synthetase isoform 2 [Rhodnius prolixus]	AMP-binding enzyme	[I] KOG1180 Acyl-CoA synthetase	Long-chain-fatty-acid--CoA ligase 4 OS=Rattus norvegicus GN=Acsl4 PE=1 SV=1
CL2092.Contig1_All	7.91	25.746	1.70545	3.86626e-179	3.99233e-180		K03861//phosphatidylinositol glycan, class P+ko00563//Glycosylphosphatidylinositol (GPI)-anchor biosynthesis+ko01100//Metabolic pathways;K03861//phosphatidylinositol glycan, class P+ko00563//Glycosylphosphatidylinositol (GPI)-anchor biosynthesis+ko01100//Metabolic pathways;K03861//phosphatidylinositol glycan, class P+ko00563//Glycosylphosphatidylinositol (GPI)-anchor biosynthesis+ko01100//Metabol…		PREDICTED: phosphatidylinositol N-acetylglucosaminyltransferase subunit P isoform X1 [Bemisia tabaci]	PIG-P	[S] KOG2257 N-acetylglucosaminyltransferase complex, subunit PIG-P, required for phosphatidylinositol biosynthesis	Phosphatidylinositol N-acetylglucosaminyltransferase subunit P OS=Mus musculus GN=Pigp PE=2 SV=1	GO:0006506//GPI anchor biosynthetic process;GO:0017176//phosphatidylinositol N-acetylglucosaminyltransferase activity;GO:0016021//integral component of membrane
CL2092.Contig3_All	6.003	14.35	1.26011	3.078e-105	5.35305e-106		K03861//phosphatidylinositol glycan, class P+ko00563//Glycosylphosphatidylinositol (GPI)-anchor biosynthesis+ko01100//Metabolic pathways;K03861//phosphatidylinositol glycan, class P+ko00563//Glycosylphosphatidylinositol (GPI)-anchor biosynthesis+ko01100//Metabolic pathways;K03861//phosphatidylinositol glycan, class P+ko00563//Glycosylphosphatidylinositol (GPI)-anchor biosynthesis+ko01100//Metabol…	KJ667071.1 Rapana venosa clone Amf18 microsatellite sequence	PREDICTED: phosphatidylinositol N-acetylglucosaminyltransferase subunit P isoform X1 [Bemisia tabaci]	PIG-P	[S] KOG2257 N-acetylglucosaminyltransferase complex, subunit PIG-P, required for phosphatidylinositol biosynthesis	Phosphatidylinositol N-acetylglucosaminyltransferase subunit P OS=Mus musculus GN=Pigp PE=2 SV=1	GO:0006506//GPI anchor biosynthetic process;GO:0017176//phosphatidylinositol N-acetylglucosaminyltransferase activity;GO:0016021//integral component of membrane
CL2093.Contig2_All	1.453	3.67	1.33574	8.86855e-30	4.41886e-30
CL2093.Contig3_All	1.5	4.356	1.53662	1.10766e-45	3.98997e-46
CL2096.Contig1_All	0	0.263	5.62511	2.35188e-07	2.73073e-07		K15378//solute carrier family 45, member 1/2/4;K15378//solute carrier family 45, member 1/2/4;K15378//solute carrier family 45, member 1/2/4;K15378//solute carrier family 45, member 1/2/4;K15378//solute carrier family 45, member 1/2/4		PREDICTED: proton-associated sugar transporter A isoform X1 [Agrilus planipennis] >XP_018326526.1 PREDICTED: proton-associated sugar transporter A isoform X1 [Agrilus planipennis]	MFS/sugar transport protein	[G] KOG0637 Sucrose transporter and related proteins	Proton-associated sugar transporter A OS=Homo sapiens GN=SLC45A1 PE=2 SV=4	GO:0008643//carbohydrate transport;GO:0016021//integral component of membrane
CL2102.Contig2_All	0.523	1.123	1.08914	6.69773e-36	2.90987e-36	zf-C2H2	K16307//serine/threonine-protein kinase MRCK [EC:2.7.11.1];K16307//serine/threonine-protein kinase MRCK [EC:2.7.11.1];K16307//serine/threonine-protein kinase MRCK [EC:2.7.11.1];K16307//serine/threonine-protein kinase MRCK [EC:2.7.11.1];K16307//serine/threonine-protein kinase MRCK [EC:2.7.11.1]	XM_022352112.1 PREDICTED: Nilaparvata lugens serine/threonine-protein kinase Genghis Khan (LOC111064389), mRNA	PREDICTED: serine/threonine-protein kinase Genghis Khan isoform X1 [Diachasma alloeum] >XP_015122610.1 PREDICTED: serine/threonine-protein kinase Genghis Khan isoform X1 [Diachasma alloeum]	CNH domain	[T] KOG0612 Rho-associated, coiled-coil containing protein kinase	Serine/threonine-protein kinase Genghis Khan OS=Drosophila melanogaster GN=gek PE=1 SV=1
CL2105.Contig4_All	7.786	20.18	1.38104	4.73227e-191	4.57281e-192		K00825//kynurenine/2-aminoadipate aminotransferase [EC:2.6.1.7 2.6.1.39]+ko00300//Lysine biosynthesis+ko00310//Lysine degradation+ko00380//Tryptophan metabolism+ko01100//Metabolic pathways+ko01210//2-Oxocarboxylic acid metabolism;K00825//kynurenine/2-aminoadipate aminotransferase [EC:2.6.1.7 2.6.1.39]+ko00300//Lysine biosynthesis+ko00310//Lysine degradation+ko00380//Tryptophan metabolism+ko01100/…		PREDICTED: kynurenine/alpha-aminoadipate aminotransferase, mitochondrial-like [Bemisia tabaci]	Aminotransferase class I and II	[E] KOG0634 Aromatic amino acid aminotransferase and related proteins	Kynurenine/alpha-aminoadipate aminotransferase, mitochondrial OS=Homo sapiens GN=AADAT PE=1 SV=2	GO:0009058//biosynthetic process;GO:0008483//transaminase activity;GO:0030170//pyridoxal phosphate binding
CL2107.Contig1_All	0.863	3.35	1.96053	3.51407e-67	9.14805e-68
CL2108.Contig10_All	0	0.356	7.40128	5.3447e-20	3.49788e-20	Homeobox	K07520//actin-binding LIM protein+ko04360//Axon guidance;K07520//actin-binding LIM protein+ko04360//Axon guidance;K07520//actin-binding LIM protein+ko04360//Axon guidance;K07520//actin-binding LIM protein+ko04360//Axon guidance;K07520//actin-binding LIM protein+ko04360//Axon guidance	XM_012668656.1 PREDICTED: Monomorium pharaonis actin-binding LIM protein 2 (LOC105829589), transcript variant X11, mRNA	LOW QUALITY PROTEIN: actin-binding LIM protein 3-like [Nilaparvata lugens]	LIM domain	[TZ] KOG1044 Actin-binding LIM Zn-finger protein Limatin involved in axon guidance	Actin-binding LIM protein 1 OS=Mus musculus GN=Ablim1 PE=1 SV=1
CL2108.Contig2_All	0.223	0.563	1.3638	9.77125e-14	8.07935e-14	Homeobox	K07520//actin-binding LIM protein+ko04360//Axon guidance;K07520//actin-binding LIM protein+ko04360//Axon guidance;K07520//actin-binding LIM protein+ko04360//Axon guidance;K07520//actin-binding LIM protein+ko04360//Axon guidance	XM_012668656.1 PREDICTED: Monomorium pharaonis actin-binding LIM protein 2 (LOC105829589), transcript variant X11, mRNA	PREDICTED: actin-binding LIM protein 1 isoform X4 [Bemisia tabaci]	LIM domain	[TZ] KOG1044 Actin-binding LIM Zn-finger protein Limatin involved in axon guidance	Actin-binding LIM protein 1 OS=Mus musculus GN=Ablim1 PE=1 SV=1
CL2108.Contig9_All	0	0.076	5.86731	2.0689e-08	2.24004e-08	Homeobox	K07520//actin-binding LIM protein+ko04360//Axon guidance;K07520//actin-binding LIM protein+ko04360//Axon guidance;K07520//actin-binding LIM protein+ko04360//Axon guidance;K07520//actin-binding LIM protein+ko04360//Axon guidance	XM_012668656.1 PREDICTED: Monomorium pharaonis actin-binding LIM protein 2 (LOC105829589), transcript variant X11, mRNA	PREDICTED: actin-binding LIM protein 1 isoform X5 [Bemisia tabaci]	LIM domain	[TZ] KOG1044 Actin-binding LIM Zn-finger protein Limatin involved in axon guidance	Actin-binding LIM protein 1 OS=Homo sapiens GN=ABLIM1 PE=1 SV=3
CL2111.Contig2_All	0.86	2.21	1.36061	7.49689e-18	5.28042e-18
CL2118.Contig2_All	0.493	1.276	1.36493	2.33445e-06	2.91578e-06
CL2120.Contig2_All	0.293	2.033	2.79661	3.90834e-19	2.63388e-19	zf-C2H2	K04157//5-hydroxytryptamine receptor 2+ko04020//Calcium signaling pathway+ko04726//Serotonergic synapse+ko04540//Gap junction+ko04750//Inflammatory mediator regulation of TRP channels+ko04080//Neuroactive ligand-receptor interaction;K09057//hepatic leukemia factor+ko04711//Circadian rhythm - fly;K09057//hepatic leukemia factor+ko04711//Circadian rhythm - fly;K18757//la-related protein 1;K02223//c…	XM_018007826.1 PREDICTED: Drosophila arizonae arginine-glutamic acid dipeptide repeats protein (LOC108613975), transcript variant X17, mRNA	hypothetical protein EPH_0021520 [Eimeria praecox]	Transcription factor IIA, alpha/beta subunit	[K] TWOG0163 Zn-finger protein basonuclin	Eukaryotic translation initiation factor 3 subunit C OS=Dictyostelium discoideum GN=eif3C PE=3 SV=1
CL2121.Contig1_All	0.736	2.343	1.67292	4.79064e-16	3.62006e-16						[L] KOG2031 Tyrosyl-DNA phosphodiesterase
CL2125.Contig3_All	0	0.07	4.77676	0.000113354	0.000163958		K07359//calcium/calmodulin-dependent protein kinase kinase 2 [EC:2.7.11.17]+ko04140//Autophagy - animal+ko04211//Longevity regulating pathway+ko05034//Alcoholism+ko04152//AMPK signaling pathway+ko04920//Adipocytokine signaling pathway+ko04921//Oxytocin signaling pathway;K07359//calcium/calmodulin-dependent protein kinase kinase 2 [EC:2.7.11.17]+ko04140//Autophagy - animal+ko04211//Longevity regul…		PREDICTED: calcium/calmodulin-dependent protein kinase kinase 1 isoform X2 [Bemisia tabaci]	Protein kinase domain	[T] KOG0585 Ca2+/calmodulin-dependent protein kinase kinase beta and related serine/threonine protein kinases	Calcium/calmodulin-dependent protein kinase kinase 1 OS=Homo sapiens GN=CAMKK1 PE=1 SV=2
CL213.Contig1_All	0	1.52	9.98908	1.3961e-83	3.02893e-84		K13509//lysophosphatidate acyltransferase [EC:2.3.1.51]+ko04072//Phospholipase D signaling pathway+ko04975//Fat digestion and absorption+ko00564//Glycerophospholipid metabolism+ko00561//Glycerolipid metabolism+ko01100//Metabolic pathways;K13509//lysophosphatidate acyltransferase [EC:2.3.1.51]+ko04072//Phospholipase D signaling pathway+ko04975//Fat digestion and absorption+ko00564//Glycerophosphol…		PREDICTED: 1-acyl-sn-glycerol-3-phosphate acyltransferase beta-like [Bemisia tabaci]	Acyltransferase	[I] KOG2848 1-acyl-sn-glycerol-3-phosphate acyltransferase	1-acyl-sn-glycerol-3-phosphate acyltransferase alpha OS=Bos taurus GN=AGPAT1 PE=2 SV=1
CL213.Contig3_All	0	0.136	7.17831	1.25715e-17	8.92987e-18		K13509//lysophosphatidate acyltransferase [EC:2.3.1.51]+ko04072//Phospholipase D signaling pathway+ko04975//Fat digestion and absorption+ko00564//Glycerophospholipid metabolism+ko00561//Glycerolipid metabolism+ko01100//Metabolic pathways;K13509//lysophosphatidate acyltransferase [EC:2.3.1.51]+ko04072//Phospholipase D signaling pathway+ko04975//Fat digestion and absorption+ko00564//Glycerophosphol…		PREDICTED: 1-acyl-sn-glycerol-3-phosphate acyltransferase beta-like [Bemisia tabaci]	Acyltransferase	[I] KOG2848 1-acyl-sn-glycerol-3-phosphate acyltransferase	1-acyl-sn-glycerol-3-phosphate acyltransferase alpha OS=Bos taurus GN=AGPAT1 PE=2 SV=1
CL213.Contig4_All	0	0.416	8.69797	2.35161e-41	9.14316e-42		K13509//lysophosphatidate acyltransferase [EC:2.3.1.51]+ko04072//Phospholipase D signaling pathway+ko04975//Fat digestion and absorption+ko00564//Glycerophospholipid metabolism+ko00561//Glycerolipid metabolism+ko01100//Metabolic pathways;K13509//lysophosphatidate acyltransferase [EC:2.3.1.51]+ko04072//Phospholipase D signaling pathway+ko04975//Fat digestion and absorption+ko00564//Glycerophosphol…		PREDICTED: 1-acyl-sn-glycerol-3-phosphate acyltransferase beta-like [Bemisia tabaci]	Acyltransferase	[I] KOG2848 1-acyl-sn-glycerol-3-phosphate acyltransferase	1-acyl-sn-glycerol-3-phosphate acyltransferase alpha OS=Bos taurus GN=AGPAT1 PE=2 SV=1
CL213.Contig5_All	0.336	0.893	1.37853	1.25785e-06	1.53826e-06
CL213.Contig7_All	2.806	11.74	2.06525	0	0		K13509//lysophosphatidate acyltransferase [EC:2.3.1.51]+ko04072//Phospholipase D signaling pathway+ko04975//Fat digestion and absorption+ko00564//Glycerophospholipid metabolism+ko00561//Glycerolipid metabolism+ko01100//Metabolic pathways;K13509//lysophosphatidate acyltransferase [EC:2.3.1.51]+ko04072//Phospholipase D signaling pathway+ko04975//Fat digestion and absorption+ko00564//Glycerophosphol…		PREDICTED: 1-acyl-sn-glycerol-3-phosphate acyltransferase beta-like [Bemisia tabaci]	Acyltransferase	[I] KOG2848 1-acyl-sn-glycerol-3-phosphate acyltransferase	1-acyl-sn-glycerol-3-phosphate acyltransferase alpha OS=Bos taurus GN=AGPAT1 PE=2 SV=1
CL2135.Contig2_All	0.386	1.706	2.13998	8.65754e-22	5.32816e-22				CLUMA_CG016464, isoform A [Clunio marinus]	Spondin_N	[W] KOG3539 Spondins, extracellular matrix proteins	Spondin-2 OS=Homo sapiens GN=SPON2 PE=1 SV=3	GO:0004867//serine-type endopeptidase inhibitor activity;GO:0005578//proteinaceous extracellular matrix
CL2144.Contig1_All	1.283	2.676	1.09088	0.000123544	0.000179502
CL2147.Contig2_All	2.38	5.9	1.31545	9.50598e-56	2.90139e-56
CL215.Contig12_All	0.003	0.26	6.00747	2.3514e-18	1.62758e-18		K00314//sarcosine dehydrogenase [EC:1.5.8.3]+ko00260//Glycine, serine and threonine metabolism+ko01100//Metabolic pathways;K00314//sarcosine dehydrogenase [EC:1.5.8.3]+ko00260//Glycine, serine and threonine metabolism+ko01100//Metabolic pathways;K00314//sarcosine dehydrogenase [EC:1.5.8.3]+ko00260//Glycine, serine and threonine metabolism+ko01100//Metabolic pathways;K00314//sarcosine dehydrogenas…		sarcosine dehydrogenase, mitochondrial-like [Zootermopsis nevadensis] >XP_021922573.1 sarcosine dehydrogenase, mitochondrial-like [Zootermopsis nevadensis] >XP_021922574.1 sarcosine dehydrogenase, mitochondrial-like [Zootermopsis nevadensis] >XP_021922576.1 sarcosine dehydrogenase, mitochondrial-like [Zootermopsis nevadensis]	FAD dependent oxidoreductase	[E] KOG2844 Dimethylglycine dehydrogenase precursor	Sarcosine dehydrogenase, mitochondrial OS=Mus musculus GN=Sardh PE=1 SV=1
CL2150.Contig1_All	0.886	2.63	1.56873	2.3858e-25	1.33086e-25
CL2155.Contig2_All	1.696	5.42	1.67999	3.96503e-78	9.09804e-79		K03138//transcription initiation factor TFIIF subunit alpha+ko03022//Basal transcription factors;K11318//ataxin-7;K20910//thioredoxin-interacting protein+ko04621//NOD-like receptor signaling pathway;K20910//thioredoxin-interacting protein+ko04621//NOD-like receptor signaling pathway;K20910//thioredoxin-interacting protein+ko04621//NOD-like receptor signaling pathway		arrestin domain-containing protein 2-like [Zootermopsis nevadensis] >KDR08474.1 Arrestin domain-containing protein 3 [Zootermopsis nevadensis]	Arrestin (or S-antigen), N-terminal domain	[R] KOG3780 Thioredoxin binding protein TBP-2/VDUP1	Arrestin domain-containing protein 3 OS=Rattus norvegicus GN=Arrdc3 PE=2 SV=1
CL2156.Contig1_All	0.426	1.743	2.03632	1.38677e-08	1.48399e-08
CL2160.Contig2_All	3.89	7.893	1.01121	3.64327e-67	9.49231e-68		K17406//small subunit ribosomal protein S27;K17406//small subunit ribosomal protein S27;K17406//small subunit ribosomal protein S27;K17406//small subunit ribosomal protein S27;K17406//small subunit ribosomal protein S27		PREDICTED: uncharacterized protein LOC107168291 [Diuraphis noxia]	Mitochondrial 28S ribosomal protein S27	[S] KOG4415 Uncharacterized conserved protein	28S ribosomal protein S27, mitochondrial OS=Bos taurus GN=MRPS27 PE=1 SV=1
CL2166.Contig10_All	0.136	0.56	2.04295	0.000306964	0.000465252		K01206//alpha-L-fucosidase [EC:3.2.1.51]+ko00511//Other glycan degradation;K01206//alpha-L-fucosidase [EC:3.2.1.51]+ko00511//Other glycan degradation;K01206//alpha-L-fucosidase [EC:3.2.1.51]+ko00511//Other glycan degradation;K01206//alpha-L-fucosidase [EC:3.2.1.51]+ko00511//Other glycan degradation;K01206//alpha-L-fucosidase [EC:3.2.1.51]+ko00511//Other glycan degradation		PREDICTED: alpha-L-fucosidase-like [Amphimedon queenslandica]	Alpha-L-fucosidase	[G] KOG3340 Alpha-L-fucosidase	Alpha-L-fucosidase OS=Branchiostoma floridae GN=BRAFLDRAFT_56888 PE=3 SV=2	GO:0006004//fucose metabolic process;GO:0004560//alpha-L-fucosidase activity
CL2166.Contig4_All	0.06	0.29	2.25709	5.96964e-08	6.65356e-08		K01206//alpha-L-fucosidase [EC:3.2.1.51]+ko00511//Other glycan degradation;K01206//alpha-L-fucosidase [EC:3.2.1.51]+ko00511//Other glycan degradation;K01206//alpha-L-fucosidase [EC:3.2.1.51]+ko00511//Other glycan degradation;K01206//alpha-L-fucosidase [EC:3.2.1.51]+ko00511//Other glycan degradation;K01206//alpha-L-fucosidase [EC:3.2.1.51]+ko00511//Other glycan degradation	XM_012677776.1 PREDICTED: Monomorium pharaonis alpha-L-fucosidase-like (LOC105834919), mRNA	alpha-L-fucosidase isoform X2 [Zootermopsis nevadensis]	Alpha-L-fucosidase	[G] KOG3340 Alpha-L-fucosidase	Plasma alpha-L-fucosidase OS=Rattus norvegicus GN=Fuca2 PE=2 SV=1	GO:0006004//fucose metabolic process;GO:0004560//alpha-L-fucosidase activity
CL217.Contig4_All	1.786	3.723	1.05938	2.7647e-53	8.80199e-54		K15169//mediator of RNA polymerase II transcription subunit 26;K15169//mediator of RNA polymerase II transcription subunit 26;K15169//mediator of RNA polymerase II transcription subunit 26;K15169//mediator of RNA polymerase II transcription subunit 26;K15169//mediator of RNA polymerase II transcription subunit 26	XM_022337896.1 PREDICTED: Nilaparvata lugens mediator of RNA polymerase II transcription subunit 26-like (LOC111051385), mRNA	mediator of RNA polymerase II transcription subunit 26-like [Nilaparvata lugens]	TFIIS helical bundle-like domain	[K] KOG1105 Transcription elongation factor TFIIS/Cofactor of enhancer-binding protein Sp1	Mediator of RNA polymerase II transcription subunit 26 OS=Xenopus laevis GN=med26 PE=2 SV=1	GO:0005634//nucleus
CL2170.Contig2_All	2.403	6.37	1.40363	1.51248e-63	4.13467e-64		K11426//SET and MYND domain-containing protein;K11426//SET and MYND domain-containing protein;K11426//SET and MYND domain-containing protein		protein msta [Zootermopsis nevadensis] >KDR18208.1 Protein msta, isoform A [Zootermopsis nevadensis]	SET domain	[B] KOG2084 Predicted histone tail methylase containing SET domain	Histone-lysine N-methyltransferase SMYD3 OS=Homo sapiens GN=SMYD3 PE=1 SV=4
CL2171.Contig2_All	0	19.87	12.4582	8.72424e-302	5.24403e-303		K10203//elongation of very long chain fatty acids protein 6 [EC:2.3.1.199]+ko01040//Biosynthesis of unsaturated fatty acids+ko00062//Fatty acid elongation+ko01100//Metabolic pathways+ko01212//Fatty acid metabolism;K10203//elongation of very long chain fatty acids protein 6 [EC:2.3.1.199]+ko01040//Biosynthesis of unsaturated fatty acids+ko00062//Fatty acid elongation+ko01100//Metabolic pathways+ko…		elongation of very long chain fatty acids protein 6 isoform X1 [Myzus persicae]	GNS1/SUR4 family	[I] KOG3072 Long chain fatty acid elongase	Elongation of very long chain fatty acids protein 6 OS=Gallus gallus GN=ELOVL6 PE=2 SV=1	GO:0102336//3-oxo-arachidoyl-CoA synthase activity;GO:0102756//very-long-chain 3-ketoacyl-CoA synthase activity;GO:0102337//3-oxo-cerotoyl-CoA synthase activity;GO:0016021//integral component of membrane;GO:0006633//fatty acid biosynthetic process;GO:0102338//3-oxo-lignoceronyl-CoA synthase activity
CL2176.Contig5_All	3.016	9.63	1.66714	6.08165e-129	8.63992e-130		K03440//acid-sensing ion channel, other		PREDICTED: uncharacterized protein LOC105669661 [Linepithema humile]	THAP domain
CL218.Contig2_All	0.16	0.74	2.19117	3.64026e-11	3.3799e-11		K01016//estrone sulfotransferase [EC:2.8.2.4]+ko00140//Steroid hormone biosynthesis;K01016//estrone sulfotransferase [EC:2.8.2.4]+ko00140//Steroid hormone biosynthesis;K01016//estrone sulfotransferase [EC:2.8.2.4]+ko00140//Steroid hormone biosynthesis;K01025//sulfotransferase [EC:2.8.2.-]	XM_015255541.1 PREDICTED: Diachasma alloeum sulfotransferase 4A1-like (LOC107037152), mRNA	estrogen sulfotransferase-like [Nilaparvata lugens]	Sulfotransferase domain	[R] KOG1584 Sulfotransferase	Sulfotransferase 1C4 OS=Homo sapiens GN=SULT1C4 PE=1 SV=2	GO:0008146//sulfotransferase activity
CL218.Contig4_All	0.04	0.36	3.17706	3.3985e-07	3.98992e-07		K01016//estrone sulfotransferase [EC:2.8.2.4]+ko00140//Steroid hormone biosynthesis;K01025//sulfotransferase [EC:2.8.2.-];K01016//estrone sulfotransferase [EC:2.8.2.4]+ko00140//Steroid hormone biosynthesis;K01016//estrone sulfotransferase [EC:2.8.2.4]+ko00140//Steroid hormone biosynthesis		estrogen sulfotransferase-like [Nilaparvata lugens]	Sulfotransferase domain	[R] KOG1584 Sulfotransferase	Amine sulfotransferase OS=Oryctolagus cuniculus GN=SULT3A1 PE=1 SV=1	GO:0008146//sulfotransferase activity
CL2184.Contig1_All	0.356	0.79	1.17078	1.87177e-10	1.79486e-10		K00142//acyl-CoA synthetase [EC:6.2.1.-];K00142//acyl-CoA synthetase [EC:6.2.1.-];K00142//acyl-CoA synthetase [EC:6.2.1.-]		acyl-CoA synthetase family member 4 [Parasteatoda tepidariorum]	PQQ-like domain	[Q] KOG4649 PQQ (pyrrolo-quinoline quinone) repeat protein	Acyl-CoA synthetase family member 4 OS=Mus musculus GN=Aasdh PE=2 SV=1	GO:0047462//phenylalanine racemase (ATP-hydrolyzing) activity;GO:0008152//metabolic process;GO:0003824//catalytic activity;GO:0016874//ligase activity
CL2184.Contig3_All	0.1	0.236	1.22569	5.84032e-07	6.96776e-07		K00142//acyl-CoA synthetase [EC:6.2.1.-];K00142//acyl-CoA synthetase [EC:6.2.1.-];K00142//acyl-CoA synthetase [EC:6.2.1.-];K00142//acyl-CoA synthetase [EC:6.2.1.-];K00142//acyl-CoA synthetase [EC:6.2.1.-]		PREDICTED: acyl-CoA synthetase family member 4 [Linepithema humile]	AMP-binding enzyme	[Q] KOG1178 Non-ribosomal peptide synthetase/alpha-aminoadipate reductase and related enzymes	Acyl-CoA synthetase family member 4 OS=Danio rerio GN=aasdh PE=3 SV=1
CL2187.Contig1_All	0.126	1.523	3.65528	5.31421e-07	6.32045e-07
CL2188.Contig2_All	0.563	3.073	2.43751	4.76123e-24	2.7522e-24
CL2189.Contig1_All	0.036	2.806	6.2799	2.098e-132	2.91667e-133	zf-C2H2	K09228//KRAB domain-containing zinc finger protein;K09228//KRAB domain-containing zinc finger protein;K09228//KRAB domain-containing zinc finger protein;K09228//KRAB domain-containing zinc finger protein		PREDICTED: zinc finger protein OZF-like [Lingula anatina]	Zinc finger, C2H2 type	[R] KOG1721 FOG: Zn-finger	Zinc finger protein 93 OS=Homo sapiens GN=ZNF93 PE=2 SV=4	GO:0003676//nucleic acid binding
CL2189.Contig2_All	0.05	11.746	7.84117	0	0	zf-C2H2	K09228//KRAB domain-containing zinc finger protein;K09228//KRAB domain-containing zinc finger protein;K09228//KRAB domain-containing zinc finger protein;K09228//KRAB domain-containing zinc finger protein		PREDICTED: zinc finger protein OZF-like [Lingula anatina]	Zinc finger, C2H2 type	[R] KOG1721 FOG: Zn-finger	Zinc finger protein 93 OS=Homo sapiens GN=ZNF93 PE=2 SV=4	GO:0003676//nucleic acid binding
CL2201.Contig1_All	0.93	2.616	1.48348	1.28273e-37	5.3791e-38	ZBTB	K10455//kelch-like protein 18;K10457//kelch-like protein 20;K10446//kelch-like protein 8;K10455//kelch-like protein 18		predicted protein [Nematostella vectensis] >EDO34935.1 predicted protein [Nematostella vectensis]	BTB/POZ domain	[R] KOG1721 FOG: Zn-finger	Kelch-like protein 18 OS=Homo sapiens GN=KLHL18 PE=1 SV=3	GO:0016567//protein ubiquitination;GO:0031463//Cul3-RING ubiquitin ligase complex
CL2205.Contig1_All	0	3.97	9.66026	5.13376e-70	1.29404e-70				PREDICTED: uncharacterized protein LOC107399032 [Tribolium castaneum] >EFA13219.1 hypothetical protein TcasGA2_TC006905 [Tribolium castaneum]	Predicted AAA-ATPase
CL2205.Contig2_All	0.163	1.196	2.88241	2.75337e-43	1.03461e-43				PREDICTED: uncharacterized protein LOC107171379 [Diuraphis noxia] >XP_015377196.1 PREDICTED: uncharacterized protein LOC107171379 [Diuraphis noxia] >XP_015377265.1 PREDICTED: uncharacterized protein LOC107171379 [Diuraphis noxia]	Predicted AAA-ATPase
CL2206.Contig2_All	1.46	3.393	1.21113	9.49288e-35	4.22331e-35
CL2208.Contig2_All	0.16	1.46	3.17233	2.4833e-20	1.60416e-20		K01307//gamma-glutamyl hydrolase [EC:3.4.19.9]+ko01523//Antifolate resistance+ko00790//Folate biosynthesis;K01307//gamma-glutamyl hydrolase [EC:3.4.19.9]+ko01523//Antifolate resistance+ko00790//Folate biosynthesis;K01307//gamma-glutamyl hydrolase [EC:3.4.19.9]+ko01523//Antifolate resistance+ko00790//Folate biosynthesis;K01307//gamma-glutamyl hydrolase [EC:3.4.19.9]+ko01523//Antifolate resistance+…		gamma-glutamyl hydrolase-like protein, partial [Maconellicoccus hirsutus]	Peptidase C26	[H] KOG1559 Gamma-glutamyl hydrolase	Gamma-glutamyl hydrolase A OS=Dictyostelium discoideum GN=gghA PE=3 SV=1
CL2217.Contig1_All	0.05	0.3	2.6194	0.000453818	0.000700853					HGWP repeat
CL2226.Contig1_All	0.16	0.743	2.22624	7.73132e-12	6.96408e-12
CL2228.Contig3_All	11.36	34.85	1.61497	0	0		K00599//methyltransferase-like protein 6 [EC:2.1.1.-];K00599//methyltransferase-like protein 6 [EC:2.1.1.-];K00599//methyltransferase-like protein 6 [EC:2.1.1.-];K00599//methyltransferase-like protein 6 [EC:2.1.1.-];K00599//methyltransferase-like protein 6 [EC:2.1.1.-]		PREDICTED: rab-like protein 6 [Bemisia tabaci]	Methyltransferase domain	[TU] KOG0084 GTPase Rab1/YPT1, small G protein superfamily, and related GTP-binding proteins	Methyltransferase-like protein 6 OS=Homo sapiens GN=METTL6 PE=2 SV=2
CL2240.Contig2_All	0.736	1.776	1.27591	2.10834e-10	2.02653e-10		K10443//kelch-like protein 2/3		uncharacterized protein LOC111032147 [Myzus persicae]	RNase H
CL2244.Contig10_All	0.426	1.646	1.94479	5.8809e-64	1.59679e-64		K15728//phosphatidate phosphatase LPIN [EC:3.1.3.4]+ko00564//Glycerophospholipid metabolism+ko00561//Glycerolipid metabolism+ko01100//Metabolic pathways;K15728//phosphatidate phosphatase LPIN [EC:3.1.3.4]+ko00564//Glycerophospholipid metabolism+ko00561//Glycerolipid metabolism+ko01100//Metabolic pathways;K15728//phosphatidate phosphatase LPIN [EC:3.1.3.4]+ko00564//Glycerophospholipid metabolism+k…		PREDICTED: phosphatidate phosphatase LPIN3 isoform X1 [Cimex lectularius]	LNS2 (Lipin/Ned1/Smp2)	[NI] KOG2116 Protein involved in plasmid maintenance/nuclear protein involved in lipid metabolism	Phosphatidate phosphatase LPIN1 OS=Mus musculus GN=Lpin1 PE=1 SV=1
CL2244.Contig9_All	2.566	5.85	1.176	1.79183e-107	3.05391e-108		K15728//phosphatidate phosphatase LPIN [EC:3.1.3.4]+ko00564//Glycerophospholipid metabolism+ko00561//Glycerolipid metabolism+ko01100//Metabolic pathways;K15728//phosphatidate phosphatase LPIN [EC:3.1.3.4]+ko00564//Glycerophospholipid metabolism+ko00561//Glycerolipid metabolism+ko01100//Metabolic pathways;K15728//phosphatidate phosphatase LPIN [EC:3.1.3.4]+ko00564//Glycerophospholipid metabolism+k…		PREDICTED: phosphatidate phosphatase LPIN3 isoform X1 [Cimex lectularius]	LNS2 (Lipin/Ned1/Smp2)	[NI] KOG2116 Protein involved in plasmid maintenance/nuclear protein involved in lipid metabolism	Phosphatidate phosphatase LPIN1 OS=Mus musculus GN=Lpin1 PE=1 SV=1
CL2256.Contig1_All	8.526	42.553	2.32103	0	0		K16641//hepatoma-derived growth factor;K16641//hepatoma-derived growth factor;K16641//hepatoma-derived growth factor;K16641//hepatoma-derived growth factor;K16641//hepatoma-derived growth factor		PREDICTED: hepatoma-derived growth factor-related protein 2 [Diaphorina citri]	Lens epithelium-derived growth factor (LEDGF)	[K] KOG1904 Transcription coactivator	Hepatoma-derived growth factor OS=Homo sapiens GN=HDGF PE=1 SV=1
CL2256.Contig2_All	3.256	8.396	1.36961	7.39243e-88	1.52027e-88		K16641//hepatoma-derived growth factor;K16641//hepatoma-derived growth factor;K16641//hepatoma-derived growth factor;K16641//hepatoma-derived growth factor;K16641//hepatoma-derived growth factor		PREDICTED: hepatoma-derived growth factor-related protein 2 [Diaphorina citri]	Lens epithelium-derived growth factor (LEDGF)	[K] KOG1904 Transcription coactivator	Hepatoma-derived growth factor OS=Homo sapiens GN=HDGF PE=1 SV=1
CL2258.Contig1_All	2.906	6.023	1.05619	1.58177e-40	6.22393e-41				PREDICTED: uncharacterized protein LOC109426273 [Aedes albopictus]	THAP domain
CL2266.Contig2_All	1.486	3.283	1.13261	1.26591e-34	5.65122e-35		K11499//centromere protein F;K10421//CAP-Gly domain-containing linker protein 1+ko04150//mTOR signaling pathway;K11498//centromeric protein E		AAEL004188-PA, partial [Aedes aegypti]	Protein of unknown function (DUF4240)		CAP-Gly domain-containing linker protein 1 OS=Gallus gallus GN=CLIP1 PE=2 SV=1
CL2269.Contig1_All	0	1.416	7.68915	1.57837e-23	9.24036e-24		K06236//collagen, type I, alpha+ko04512//ECM-receptor interaction+ko04510//Focal adhesion+ko04933//AGE-RAGE signaling pathway in diabetic complications+ko04611//Platelet activation+ko05146//Amoebiasis+ko04974//Protein digestion and absorption+ko04151//PI3K-Akt signaling pathway+ko04926//Relaxin signaling pathway+ko05165//Human papillomavirus infection;K06236//collagen, type I, alpha+ko04512//ECM-…	NM_199214.1 Danio rerio collagen, type I, alpha 1a (col1a1a), mRNA >AY380817.1 Danio rerio chihuahua (chi) mRNA, complete cds	Collagen, type I, alpha 1 [Danio rerio]	Fibrillar collagen C-terminal domain	[W] KOG3544 Collagens (type IV and type XIII), and related proteins	Collagen alpha-1(I) chain OS=Homo sapiens GN=COL1A1 PE=1 SV=5	GO:0033333//fin development;GO:0033339//pectoral fin development;GO:0033334//fin morphogenesis;GO:0005201//extracellular matrix structural constituent;GO:0005737//cytoplasm;GO:0030278//regulation of ossification;GO:0031101//fin regeneration
CL2269.Contig2_All	0	0.41	5.10747	1.4801e-05	1.97642e-05		K06236//collagen, type I, alpha+ko04512//ECM-receptor interaction+ko04510//Focal adhesion+ko04933//AGE-RAGE signaling pathway in diabetic complications+ko04611//Platelet activation+ko05146//Amoebiasis+ko04974//Protein digestion and absorption+ko04151//PI3K-Akt signaling pathway+ko04926//Relaxin signaling pathway+ko05165//Human papillomavirus infection;K06236//collagen, type I, alpha+ko04512//ECM-…	NM_131292.1 Danio rerio collagen, type II, alpha 1a (col2a1a), mRNA >DQ335127.1 Danio rerio collagen type II, alpha 1 (col2a1) mRNA, complete cds	PREDICTED: collagen alpha-1(I) chain-like isoform X2 [Ictalurus punctatus]	Fibrillar collagen C-terminal domain	[W] KOG3544 Collagens (type IV and type XIII), and related proteins	Collagen alpha-1(I) chain OS=Cynops pyrrhogaster GN=COL1A1 PE=2 SV=1
CL2272.Contig1_All	0.883	7.216	3.03848	4.28342e-96	8.05935e-97
CL2276.Contig1_All	2.786	9.136	1.7121	1.24841e-155	1.49402e-156		K22188//chloride channel CLIC-like protein 1;K22188//chloride channel CLIC-like protein 1;K22188//chloride channel CLIC-like protein 1;K22188//chloride channel CLIC-like protein 1;K22188//chloride channel CLIC-like protein 1		odorant-binding protein [Phenacoccus solenopsis]	PBP/GOBP family		Chloride channel CLIC-like protein 1 OS=Xenopus laevis GN=clcc1 PE=2 SV=1
CL228.Contig2_All	0.13	0.286	1.10881	5.28956e-05	7.41517e-05
CL2289.Contig2_All	2.806	17.446	2.63164	0	0					Radical SAM superfamily
CL23.Contig11_All	2.376	5.126	1.10113	2.30424e-52	7.44371e-53				uncharacterized protein LOC107446311 [Parasteatoda tepidariorum]
CL23.Contig13_All	0.19	0.8	2.06466	1.19965e-21	7.4183e-22				uncharacterized protein LOC107446311 [Parasteatoda tepidariorum]
CL23.Contig14_All	7.683	17.19	1.16246	3.00996e-187	2.98706e-188
CL23.Contig4_All	6.303	13.53	1.1061	3.80027e-139	5.10559e-140				uncharacterized protein LOC107446311 [Parasteatoda tepidariorum]
CL23.Contig6_All	0.13	3.54	4.74536	2.5736e-187	2.54843e-188
CL2318.Contig2_All	1.066	3.02	1.51831	2.40139e-57	7.1337e-58		K07299//MFS transporter, SP family, solute carrier family 2 (facilitated glucose transporter), member 1+ko04919//Thyroid hormone signaling pathway+ko04911//Insulin secretion+ko05211//Renal cell carcinoma+ko04976//Bile secretion+ko05200//Pathways in cancer+ko04931//Insulin resistance+ko05230//Central carbon metabolism in cancer+ko04066//HIF-1 signaling pathway+ko04922//Glucagon signaling pathway+k…	XM_016802466.1 PREDICTED: Acyrthosiphon pisum glucose transporter type 1 (LOC100165001), transcript variant X5, mRNA	PREDICTED: glucose transporter type 1 isoform X2 [Tribolium castaneum]	Sugar (and other) transporter	[G] KOG0569 Permease of the major facilitator superfamily	Glucose transporter type 1 OS=Drosophila melanogaster GN=Glut1 PE=2 SV=4
CL2330.Contig2_All	1.003	2.693	1.43227	4.71813e-66	1.25082e-66		K21407//adipocyte plasma membrane-associated protein;K21407//adipocyte plasma membrane-associated protein;K21407//adipocyte plasma membrane-associated protein;K21407//adipocyte plasma membrane-associated protein;K21407//adipocyte plasma membrane-associated protein	CR854927.24 Zebrafish DNA sequence from clone DKEY-40M6 in linkage group 16, complete sequence	PREDICTED: adipocyte plasma membrane-associated protein-like [Diuraphis noxia]	HEAT repeats	[R] KOG0567 HEAT repeat-containing protein	Deoxyhypusine hydroxylase OS=Danio rerio GN=dohh PE=2 SV=1
CL2336.Contig3_All	0	0.536	8.69946	2.17398e-41	8.44779e-42		K04412//serine/threonine kinase 3+ko04391//Hippo signaling pathway - fly+ko04390//Hippo signaling pathway+ko04392//Hippo signaling pathway - multiple species+ko04214//Apoptosis - fly+ko04010//MAPK signaling pathway;K04412//serine/threonine kinase 3+ko04391//Hippo signaling pathway - fly+ko04390//Hippo signaling pathway+ko04392//Hippo signaling pathway - multiple species+ko04214//Apoptosis - fly+k…	XM_014372857.1 PREDICTED: Trichogramma pretiosum serine/threonine-protein kinase 3-like (LOC106653424), mRNA	PREDICTED: serine/threonine-protein kinase 3 isoform X1 [Halyomorpha halys]	Protein kinase domain	[T] KOG0574 STE20-like serine/threonine kinase MST	Serine/threonine-protein kinase 3 OS=Rattus norvegicus GN=Stk3 PE=1 SV=1
CL2338.Contig2_All	0.686	4.54	2.70751	0	0	Homeobox	K17491//protein phosphatase 4 regulatory subunit 3+ko04212//Longevity regulating pathway - worm+ko04922//Glucagon signaling pathway;K17491//protein phosphatase 4 regulatory subunit 3+ko04212//Longevity regulating pathway - worm+ko04922//Glucagon signaling pathway;K17491//protein phosphatase 4 regulatory subunit 3+ko04212//Longevity regulating pathway - worm+ko04922//Glucagon signaling pathway;K17…	XM_002431719.1 Pediculus humanus corporis conserved hypothetical protein, mRNA	serine/threonine-protein phosphatase 4 regulatory subunit 3 isoform X2 [Zootermopsis nevadensis]	Component of IIS longevity pathway SMK-1	[G] KOG2175 Protein predicted to be involved in carbohydrate metabolism	Serine/threonine-protein phosphatase 4 regulatory subunit 3 OS=Drosophila melanogaster GN=flfl PE=1 SV=4
CL2338.Contig3_All	0	0.413	8.24282	4.14736e-32	1.95963e-32		K17491//protein phosphatase 4 regulatory subunit 3+ko04212//Longevity regulating pathway - worm+ko04922//Glucagon signaling pathway;K17491//protein phosphatase 4 regulatory subunit 3+ko04212//Longevity regulating pathway - worm+ko04922//Glucagon signaling pathway;K17491//protein phosphatase 4 regulatory subunit 3+ko04212//Longevity regulating pathway - worm+ko04922//Glucagon signaling pathway;K17…	XM_002431719.1 Pediculus humanus corporis conserved hypothetical protein, mRNA	serine/threonine-protein phosphatase 4 regulatory subunit 3 isoform X2 [Zootermopsis nevadensis]	Component of IIS longevity pathway SMK-1	[G] KOG2175 Protein predicted to be involved in carbohydrate metabolism	Serine/threonine-protein phosphatase 4 regulatory subunit 3 OS=Drosophila melanogaster GN=flfl PE=1 SV=4
CL2342.Contig2_All	0	0.67	8.14831	1.86734e-30	9.15403e-31		K08145//MFS transporter, SP family, solute carrier family 2 (facilitated glucose transporter), member 8;K08145//MFS transporter, SP family, solute carrier family 2 (facilitated glucose transporter), member 8;K08145//MFS transporter, SP family, solute carrier family 2 (facilitated glucose transporter), member 8;K08145//MFS transporter, SP family, solute carrier family 2 (facilitated glucose transp…		facilitated trehalose transporter Tret1-like [Nilaparvata lugens] >XP_022201483.1 facilitated trehalose transporter Tret1-like [Nilaparvata lugens] >XP_022201484.1 facilitated trehalose transporter Tret1-like [Nilaparvata lugens]	Sugar (and other) transporter	[R] KOG0254 Predicted transporter (major facilitator superfamily)	Facilitated trehalose transporter Tret1 OS=Polypedilum vanderplanki GN=Tret1 PE=1 SV=1
CL2344.Contig1_All	1.383	2.826	1.04308	8.83089e-24	5.14016e-24				Uncharacterized protein Tcan_14684 [Toxocara canis]	Meiosis-specific coiled-coil domain-containing protein MEIOC
CL2344.Contig4_All	1.496	6.26	2.07961	8.57949e-27	4.60588e-27
CL2355.Contig1_All	0.206	1.336	2.68235	2.63776e-123	3.93657e-124		K19525//vacuolar protein sorting-associated protein 13A/C;K19525//vacuolar protein sorting-associated protein 13A/C;K19525//vacuolar protein sorting-associated protein 13A/C;K19525//vacuolar protein sorting-associated protein 13A/C;K19525//vacuolar protein sorting-associated protein 13A/C	XM_012359933.1 PREDICTED: Linepithema humile uncharacterized LOC105667851 (LOC105667851), mRNA	PREDICTED: zinc finger SWIM domain-containing protein 8-like [Plutella xylostella]	Repeating coiled region of VPS13	[S] KOG3615 Uncharacterized conserved protein	Vacuolar protein sorting-associated protein 13 OS=Drosophila melanogaster GN=Vps13 PE=1 SV=2
CL2356.Contig2_All	0.933	2.813	1.5973	2.64253e-84	5.66709e-85		K20184//vacuolar protein sorting-associated protein 41;K20184//vacuolar protein sorting-associated protein 41;K20184//vacuolar protein sorting-associated protein 41;K20184//vacuolar protein sorting-associated protein 41;K20184//vacuolar protein sorting-associated protein 41		vacuolar protein sorting-associated protein 41 homolog [Zootermopsis nevadensis] >XP_021935190.1 vacuolar protein sorting-associated protein 41 homolog [Zootermopsis nevadensis] >KDR11061.1 Vacuolar protein sorting-associated protein 41-like protein [Zootermopsis nevadensis]	Region in Clathrin and VPS	[U] KOG2066 Vacuolar assembly/sorting protein VPS41	Vacuolar protein sorting-associated protein 41 homolog OS=Mus musculus GN=Vps41 PE=1 SV=1
CL2359.Contig2_All	0.943	2.03	1.10818	2.63441e-13	2.21921e-13		K02183//calmodulin+ko04024//cAMP signaling pathway+ko04022//cGMP-PKG signaling pathway+ko04020//Calcium signaling pathway+ko05133//Pertussis+ko04218//Cellular senescence+ko04070//Phosphatidylinositol signaling system+ko04916//Melanogenesis+ko04915//Estrogen signaling pathway+ko04912//GnRH signaling pathway+ko04910//Insulin signaling pathway+ko05418//Fluid shear stress and atherosclerosis+ko05170/…		PREDICTED: calmodulin-like [Leptonychotes weddellii]		[T] KOG0027 Calmodulin and related proteins (EF-Hand superfamily)	Calmodulin OS=Dictyostelium discoideum GN=calA PE=1 SV=3
CL2371.Contig6_All	4.31	12.606	1.54421	0	0		K19909//synaptotagmin-9;K00923//phosphatidylinositol-4-phosphate 3-kinase [EC:2.7.1.154]+ko04070//Phosphatidylinositol signaling system+ko00562//Inositol phosphate metabolism+ko01100//Metabolic pathways;K19906//synaptotagmin-6;K19909//synaptotagmin-9		conserved hypothetical protein [Pediculus humanus corporis] >EEB18657.1 conserved hypothetical protein [Pediculus humanus corporis]	C2 domain	[R] KOG1012 Ca2+-dependent lipid-binding protein CLB1/vesicle protein vp115/Granuphilin A, contains C2 domain	Extended synaptotagmin-1 OS=Rattus norvegicus GN=Esyt1 PE=1 SV=1	GO:0008289//lipid binding;GO:0016021//integral component of membrane
CL2383.Contig2_All	0.83	3.403	2.05186	1.25724e-33	5.73686e-34	TF_bZIP	K09050//cAMP response element-binding protein, invertebrate;K09050//cAMP response element-binding protein, invertebrate;K09050//cAMP response element-binding protein, invertebrate;K09050//cAMP response element-binding protein, invertebrate	XM_011498493.1 PREDICTED: Ceratosolen solmsi marchali cyclic AMP-responsive element-binding protein 1 (LOC105361349), transcript variant X2, mRNA	PREDICTED: cyclic AMP-responsive element-binding protein 1 [Diaphorina citri]	bZIP transcription factor	[K] KOG3584 cAMP response element binding protein and related transcription factors	Cyclic AMP response element-binding protein B OS=Drosophila melanogaster GN=CrebB PE=1 SV=1	GO:0003677//DNA binding;GO:0005634//nucleus;GO:0003700//DNA binding transcription factor activity
CL2384.Contig1_All	0.56	9.053	4.0125	0	0		K07207//tuberous sclerosis 2+ko04140//Autophagy - animal+ko04211//Longevity regulating pathway+ko04218//Cellular senescence+ko04072//Phospholipase D signaling pathway+ko04919//Thyroid hormone signaling pathway+ko04910//Insulin signaling pathway+ko04714//Thermogenesis+ko04152//AMPK signaling pathway+ko04151//PI3K-Akt signaling pathway+ko04150//mTOR signaling pathway+ko05231//Choline metabolism in …		PREDICTED: ral GTPase-activating protein subunit alpha-1 [Cimex lectularius]	Rap/ran-GAP	[T] KOG3686 Rap1-GTPase-activating protein (Rap1GAP)	Ral GTPase-activating protein subunit alpha-2 OS=Rattus norvegicus GN=Ralgapa2 PE=1 SV=1	GO:0005634//nucleus;GO:0051056//regulation of small GTPase mediated signal transduction;GO:0005096//GTPase activator activity
CL2386.Contig1_All	0.636	2.57	2.01697	1.89137e-15	1.4617e-15			JN945437.1 Mus musculus targeted deletion, lacZ-tagged mutant allele Klf4:tm1(KOMP)Wtsi; transgenic
CL239.Contig4_All	0.316	2.96	3.22758	9.34975e-101	1.6921e-101		K14457//2-acylglycerol O-acyltransferase 2 [EC:2.3.1.22]+ko04975//Fat digestion and absorption+ko00561//Glycerolipid metabolism;K14457//2-acylglycerol O-acyltransferase 2 [EC:2.3.1.22]+ko04975//Fat digestion and absorption+ko00561//Glycerolipid metabolism;K11160//diacylglycerol O-acyltransferase 2 [EC:2.3.1.20 2.3.1.75]+ko04975//Fat digestion and absorption+ko00561//Glycerolipid metabolism+ko0110…		PREDICTED: 2-acylglycerol O-acyltransferase 2-A-like [Bemisia tabaci]	Diacylglycerol acyltransferase	[I] KOG0831 Acyl-CoA:diacylglycerol acyltransferase (DGAT)	2-acylglycerol O-acyltransferase 2 OS=Homo sapiens GN=MOGAT2 PE=1 SV=2	GO:0016021//integral component of membrane;GO:0016747//transferase activity, transferring acyl groups other than amino-acyl groups
CL2393.Contig3_All	0.033	0.136	2.1382	5.43349e-05	7.62698e-05	bHLH	K10719//juvenile hormone epoxide hydrolase+ko00981//Insect hormone biosynthesis;K10719//juvenile hormone epoxide hydrolase+ko00981//Insect hormone biosynthesis;K10719//juvenile hormone epoxide hydrolase+ko00981//Insect hormone biosynthesis;K10719//juvenile hormone epoxide hydrolase+ko00981//Insect hormone biosynthesis;K10719//juvenile hormone epoxide hydrolase+ko00981//Insect hormone biosynthesis		PREDICTED: juvenile hormone epoxide hydrolase 2-like [Cephus cinctus]	Epoxide hydrolase N terminus	[R] KOG2565 Predicted hydrolases or acyltransferases (alpha/beta hydrolase superfamily)	Juvenile hormone epoxide hydrolase 1 OS=Ctenocephalides felis GN=EH1 PE=1 SV=3
CL2395.Contig1_All	0.44	0.893	1.00305	1.96022e-08	2.11875e-08		K01887//arginyl-tRNA synthetase [EC:6.1.1.19]+ko00970//Aminoacyl-tRNA biosynthesis;K01887//arginyl-tRNA synthetase [EC:6.1.1.19]+ko00970//Aminoacyl-tRNA biosynthesis;K01887//arginyl-tRNA synthetase [EC:6.1.1.19]+ko00970//Aminoacyl-tRNA biosynthesis;K01887//arginyl-tRNA synthetase [EC:6.1.1.19]+ko00970//Aminoacyl-tRNA biosynthesis;K01887//arginyl-tRNA synthetase [EC:6.1.1.19]+ko00970//Aminoacyl-tR…		probable arginine--tRNA ligase, mitochondrial isoform X1 [Zootermopsis nevadensis] >KDR13513.1 putative arginyl-tRNA synthetase, mitochondrial [Zootermopsis nevadensis]	tRNA synthetases class I (R)	[J] KOG1195 Arginyl-tRNA synthetase	Probable arginine--tRNA ligase, mitochondrial OS=Mus musculus GN=Rars2 PE=1 SV=1	GO:0004814//arginine-tRNA ligase activity;GO:0005524//ATP binding;GO:0006420//arginyl-tRNA aminoacylation
CL2398.Contig10_All	0	0.573	8.00848	3.69319e-28	1.91163e-28		K14943//muscleblind;K14943//muscleblind;K14943//muscleblind;K14943//muscleblind;K14943//muscleblind		PREDICTED: protein muscleblind isoform X7 [Bemisia tabaci]	Antifungal protein	[K] KOG2494 C3H1-type Zn-finger protein	Protein muscleblind OS=Drosophila melanogaster GN=mbl PE=2 SV=2
CL2398.Contig11_All	0	0.813	8.33789	7.37766e-34	3.35123e-34		K14943//muscleblind;K14943//muscleblind;K14943//muscleblind;K14943//muscleblind;K14943//muscleblind	LN590730.1 Cyprinus carpio genome assembly common carp genome ,scaffold 000000049	PREDICTED: protein muscleblind isoform X2 [Cimex lectularius]	Antifungal protein	[K] KOG2494 C3H1-type Zn-finger protein	Protein muscleblind OS=Drosophila melanogaster GN=mbl PE=2 SV=2
CL2398.Contig12_All	0	0.19	6.0244	3.50204e-09	3.62309e-09		K14943//muscleblind;K14943//muscleblind;K14943//muscleblind;K14943//muscleblind;K14943//muscleblind	LN590730.1 Cyprinus carpio genome assembly common carp genome ,scaffold 000000049	PREDICTED: protein muscleblind isoform X4 [Cimex lectularius]	Antifungal protein	[K] KOG2494 C3H1-type Zn-finger protein	Protein muscleblind OS=Drosophila melanogaster GN=mbl PE=2 SV=2
CL2398.Contig2_All	0.486	1.183	1.30007	3.79039e-21	2.38465e-21		K14943//muscleblind;K14943//muscleblind;K14943//muscleblind;K14943//muscleblind;K14943//muscleblind	XR_443869.2 PREDICTED: Panthera tigris altaica uncharacterized LOC102965250 (LOC102965250), transcript variant X7, ncRNA	PREDICTED: muscleblind-like protein isoform X1 [Bemisia tabaci]	Transmembrane protein	[K] KOG2494 C3H1-type Zn-finger protein	Protein muscleblind OS=Drosophila melanogaster GN=mbl PE=2 SV=2	GO:0046872//metal ion binding
CL2398.Contig3_All	0.33	7.096	4.43247	0	0		K14943//muscleblind;K14943//muscleblind;K14943//muscleblind;K14943//muscleblind;K14943//muscleblind	XR_443869.2 PREDICTED: Panthera tigris altaica uncharacterized LOC102965250 (LOC102965250), transcript variant X7, ncRNA	PREDICTED: uncharacterized protein LOC105266892 isoform X6 [Fopius arisanus]	Transmembrane protein	[K] KOG2494 C3H1-type Zn-finger protein	Protein muscleblind OS=Drosophila melanogaster GN=mbl PE=2 SV=2	GO:0046872//metal ion binding
CL2398.Contig8_All	0.193	2.12	3.44491	1.38935e-148	1.74726e-149		K13356//alcohol-forming fatty acyl-CoA reductase [EC:1.2.1.84]+ko04146//Peroxisome+ko04212//Longevity regulating pathway - worm+ko00073//Cutin, suberine and wax biosynthesis	XR_443869.2 PREDICTED: Panthera tigris altaica uncharacterized LOC102965250 (LOC102965250), transcript variant X7, ncRNA	PREDICTED: muscleblind-like protein isoform X5 [Tribolium castaneum]	Male sterility protein	[I] KOG1221 Acyl-CoA reductase	Fatty acyl-CoA reductase 1 OS=Xenopus laevis GN=far1 PE=2 SV=1	GO:0080019//fatty-acyl-CoA reductase (alcohol-forming) activity;GO:0016021//integral component of membrane;GO:0102965//alcohol-forming fatty acyl-CoA reductase activity;GO:0006629//lipid metabolic process
CL240.Contig1_All	0	11.07	11.2713	2.17352e-164	2.4334e-165		K12314//actin, alpha cardiac muscle+ko05414//Dilated cardiomyopathy (DCM)+ko05410//Hypertrophic cardiomyopathy (HCM)+ko04261//Adrenergic signaling in cardiomyocytes+ko04260//Cardiac muscle contraction;K12314//actin, alpha cardiac muscle+ko05414//Dilated cardiomyopathy (DCM)+ko05410//Hypertrophic cardiomyopathy (HCM)+ko04261//Adrenergic signaling in cardiomyocytes+ko04260//Cardiac muscle contracti…	BC161649.1 Danio rerio actin, alpha 1, skeletal muscle, mRNA (cDNA clone MGC:174190 IMAGE:8784564), complete cds	PREDICTED: actin, alpha skeletal muscle [Sinocyclocheilus anshuiensis] >XP_016339940.1 PREDICTED: actin, alpha skeletal muscle [Sinocyclocheilus anshuiensis] >XP_018977009.1 PREDICTED: actin, alpha skeletal muscle [Cyprinus carpio] >P53479.1 RecName: Full=Actin, alpha skeletal muscle; AltName: Full=Alpha-actin-1; Flags: Precursor >BAA08755.1 skeletal alpha-actin [Cyprinus carpio] >AAU00980.1 skel…	Actin	[Z] KOG0676 Actin and related proteins	Actin, alpha skeletal muscle OS=Cyprinus carpio GN=acta1 PE=2 SV=1	GO:0005856//cytoskeleton;GO:0005524//ATP binding;GO:0005737//cytoplasm
CL240.Contig2_All	0	0.82	6.52603	3.52565e-12	3.11752e-12		K10354//actin, alpha skeletal muscle;K10354//actin, alpha skeletal muscle;K12314//actin, alpha cardiac muscle+ko05414//Dilated cardiomyopathy (DCM)+ko05410//Hypertrophic cardiomyopathy (HCM)+ko04261//Adrenergic signaling in cardiomyocytes+ko04260//Cardiac muscle contraction;K10354//actin, alpha skeletal muscle;K10354//actin, alpha skeletal muscle	NM_214784.2 Danio rerio actin, alpha 1b, skeletal muscle (acta1b), mRNA >BC098546.1 Danio rerio actin, alpha 1b, skeletal muscle, mRNA (cDNA clone MGC:110101 IMAGE:7284336), complete cds	PREDICTED: actin, alpha skeletal muscle [Astyanax mexicanus] >XP_015463524.1 PREDICTED: actin, alpha skeletal muscle 2 [Astyanax mexicanus] >XP_017552079.1 PREDICTED: actin, alpha skeletal muscle [Pygocentrus nattereri]	Actin	[Z] KOG0676 Actin and related proteins	Actin, alpha skeletal muscle 2 OS=Xenopus laevis GN=act2 PE=2 SV=1	GO:0005856//cytoskeleton;GO:0005524//ATP binding;GO:0035050//embryonic heart tube development;GO:0005737//cytoplasm
CL240.Contig3_All	0	1.273	8.1781	5.74524e-31	2.7827e-31		K10354//actin, alpha skeletal muscle;K12314//actin, alpha cardiac muscle+ko05414//Dilated cardiomyopathy (DCM)+ko05410//Hypertrophic cardiomyopathy (HCM)+ko04261//Adrenergic signaling in cardiomyocytes+ko04260//Cardiac muscle contraction;K10354//actin, alpha skeletal muscle;K12314//actin, alpha cardiac muscle+ko05414//Dilated cardiomyopathy (DCM)+ko05410//Hypertrophic cardiomyopathy (HCM)+ko04261…	BC168467.1 Danio rerio actin, alpha 1, skeletal muscle, mRNA (cDNA clone MGC:172132 IMAGE:8000653), complete cds	actin, alpha skeletal muscle 2-like [Clupea harengus] >XP_016149658.1 PREDICTED: actin, alpha skeletal muscle 2-like [Sinocyclocheilus grahami] >XP_016149659.1 PREDICTED: actin, alpha skeletal muscle 2-like [Sinocyclocheilus grahami] >XP_016326646.1 PREDICTED: actin, alpha skeletal muscle 2-like [Sinocyclocheilus anshuiensis] >XP_016390211.1 PREDICTED: actin, alpha skeletal muscle 2-like [Sinocyc…	Actin	[Z] KOG0676 Actin and related proteins	Actin, muscle OS=Aplysia californica PE=2 SV=1	GO:0005524//ATP binding
CL240.Contig4_All	0.006	2.976	8.86188	6.59048e-89	1.33386e-89		K05692//actin beta/gamma 1+ko04391//Hippo signaling pathway - fly+ko04390//Hippo signaling pathway+ko05414//Dilated cardiomyopathy (DCM)+ko05416//Viral myocarditis+ko05410//Hypertrophic cardiomyopathy (HCM)+ko05412//Arrhythmogenic right ventricular cardiomyopathy (ARVC)+ko04145//Phagosome+ko05132//Salmonella infection+ko05130//Pathogenic Escherichia coli infection+ko05131//Shigellosis+ko04810//Re…	BC045879.1 Danio rerio bactin2, mRNA (cDNA clone MGC:56040 IMAGE:3820122), complete cds	actin, cytoplasmic 2 [Danio rerio] >XP_007247883.1 PREDICTED: actin, cytoplasmic 1 [Astyanax mexicanus] >XP_016136449.1 PREDICTED: actin, cytoplasmic 1 [Sinocyclocheilus grahami] >XP_016136454.1 PREDICTED: actin, cytoplasmic 1 [Sinocyclocheilus grahami] >XP_016361526.1 PREDICTED: actin, cytoplasmic 1 [Sinocyclocheilus anshuiensis] >XP_016324144.1 PREDICTED: actin, cytoplasmic 1 [Sinocyclocheilus …	Actin	[Z] KOG0676 Actin and related proteins	Actin (Fragment) OS=Lumbricus rubellus PE=2 SV=1	GO:0097433//dense body;GO:0005856//cytoskeleton;GO:0005524//ATP binding;GO:0005925//focal adhesion;GO:0005886//plasma membrane
CL2400.Contig1_All	2.88	6.876	1.25092	4.19135e-97	7.84057e-98	TEA	K09448//transcriptional enhancer factor+ko04391//Hippo signaling pathway - fly+ko04390//Hippo signaling pathway+ko04392//Hippo signaling pathway - multiple species;K09448//transcriptional enhancer factor+ko04391//Hippo signaling pathway - fly+ko04390//Hippo signaling pathway+ko04392//Hippo signaling pathway - multiple species;K09448//transcriptional enhancer factor+ko04391//Hippo signaling pathwa…	XM_015937701.1 PREDICTED: Tetranychus urticae protein scalloped-like (LOC107369729), mRNA	transcriptional enhancer factor TEF-1 [Zootermopsis nevadensis]	TEA/ATTS domain family	[K] KOG3841 TEF-1 and related transcription factor, TEAD family	Transcriptional enhancer factor TEF-3 OS=Mus musculus GN=Tead4 PE=1 SV=2
CL2401.Contig3_All	6.966	15.603	1.15386	2.45018e-150	3.0453e-151	zf-C2H2	K16811//trichoplein keratin filament-binding protein;K16811//trichoplein keratin filament-binding protein;K16811//trichoplein keratin filament-binding protein;K16811//trichoplein keratin filament-binding protein		trichoplein keratin filament-binding protein-like [Zootermopsis nevadensis] >XP_021940813.1 trichoplein keratin filament-binding protein-like [Zootermopsis nevadensis] >KDR07309.1 Trichoplein keratin filament-binding protein [Zootermopsis nevadensis]	Trichohyalin-plectin-homology domain	[W] LSE0345 A 12S cruciferin seed storage protein/vicilin-like seed storage protein	Trichoplein keratin filament-binding protein OS=Mus musculus GN=Tchp PE=1 SV=2	GO:0005856//cytoskeleton;GO:0005737//cytoplasm
CL241.Contig4_All	0.026	1.333	5.74682	2.76604e-43	1.03967e-43					Protein of unknown function (DUF3762)
CL241.Contig7_All	0	0.173	5.34769	2.54486e-06	3.19021e-06
CL2423.Contig1_All	0.37	1.053	1.52164	1.68613e-18	1.1605e-18		K01389//neprilysin [EC:3.4.24.11]+ko04640//Hematopoietic cell lineage+ko04614//Renin-angiotensin system+ko04974//Protein digestion and absorption+ko05010//Alzheimer disease;K01415//endothelin-converting enzyme [EC:3.4.24.71];K01415//endothelin-converting enzyme [EC:3.4.24.71];K01415//endothelin-converting enzyme [EC:3.4.24.71];K01415//endothelin-converting enzyme [EC:3.4.24.71]		Neprilysin-2, partial [Acromyrmex echinatior]	Peptidase family M13	[E] KOG3624 M13 family peptidase	Endothelin-converting enzyme 1 OS=Homo sapiens GN=ECE1 PE=1 SV=2
CL2428.Contig2_All	0	0.163	4.77891	0.00011199	0.000161935		K19625//retinaldehyde-binding protein 1;K19625//retinaldehyde-binding protein 1;K19625//retinaldehyde-binding protein 1;K19625//retinaldehyde-binding protein 1;K19625//retinaldehyde-binding protein 1		PREDICTED: clavesin-2 [Apis mellifera] >XP_016773295.1 PREDICTED: clavesin-2 [Apis mellifera]	CRAL/TRIO domain	[I] KOG1471 Phosphatidylinositol transfer protein SEC14 and related proteins	Alpha-tocopherol transfer protein-like OS=Homo sapiens GN=TTPAL PE=1 SV=2	GO:0005622//intracellular;GO:0005215//transporter activity
CL2452.Contig3_All	5.856	14.643	1.31582	0	0		K18809//protein toll+ko04624//Toll and Imd signaling pathway;K18809//protein toll+ko04624//Toll and Imd signaling pathway;K18809//protein toll+ko04624//Toll and Imd signaling pathway;K18809//protein toll+ko04624//Toll and Imd signaling pathway		PREDICTED: protein toll [Halyomorpha halys]	Leucine rich repeat	[T] KOG4641 FOG: Toll/interleukin receptor and related proteins containing LRR and TIR repeats	Leucine-rich repeat-containing protein 15 OS=Mus musculus GN=Lrrc15 PE=2 SV=1	GO:0007165//signal transduction;GO:0004721//phosphoprotein phosphatase activity;GO:0016021//integral component of membrane;GO:0045087//innate immune response
CL2453.Contig1_All	0	0.24	6.78719	4.01667e-14	3.27228e-14		K10758//thiol oxidase [EC:1.8.3.2];K10758//thiol oxidase [EC:1.8.3.2];K10758//thiol oxidase [EC:1.8.3.2];K10758//thiol oxidase [EC:1.8.3.2];K10758//thiol oxidase [EC:1.8.3.2]		PREDICTED: sulfhydryl oxidase 2 [Trichogramma pretiosum] >XP_014236325.1 PREDICTED: sulfhydryl oxidase 2 [Trichogramma pretiosum] >XP_014236326.1 PREDICTED: sulfhydryl oxidase 2 [Trichogramma pretiosum]	Erv1 / Alr family	[D] KOG1731 FAD-dependent sulfhydryl oxidase/quiescin and related proteins	Sulfhydryl oxidase 1 OS=Rattus norvegicus GN=Qsox1 PE=1 SV=1
CL2453.Contig3_All	0.11	4.833	5.40649	1.39463e-280	9.33797e-282		K10758//thiol oxidase [EC:1.8.3.2];K10758//thiol oxidase [EC:1.8.3.2];K10758//thiol oxidase [EC:1.8.3.2];K10758//thiol oxidase [EC:1.8.3.2];K10758//thiol oxidase [EC:1.8.3.2]		PREDICTED: sulfhydryl oxidase 2 [Trichogramma pretiosum] >XP_014236325.1 PREDICTED: sulfhydryl oxidase 2 [Trichogramma pretiosum] >XP_014236326.1 PREDICTED: sulfhydryl oxidase 2 [Trichogramma pretiosum]	Erv1 / Alr family	[D] KOG1731 FAD-dependent sulfhydryl oxidase/quiescin and related proteins	Sulfhydryl oxidase 1 OS=Rattus norvegicus GN=Qsox1 PE=1 SV=1
CL2455.Contig6_All	0.143	0.463	1.68136	6.64558e-12	5.96731e-12		K14708//solute carrier family 26 (sodium-independent sulfate anion transporter), member 11;K14708//solute carrier family 26 (sodium-independent sulfate anion transporter), member 11;K14708//solute carrier family 26 (sodium-independent sulfate anion transporter), member 11;K14708//solute carrier family 26 (sodium-independent sulfate anion transporter), member 11	LN590709.1 Cyprinus carpio genome assembly common carp genome, scaffold: LG5, chromosome: 5	sodium-independent sulfate anion transporter isoform X2 [Zootermopsis nevadensis] >KDR22565.1 Sodium-independent sulfate anion transporter [Zootermopsis nevadensis]	Sulfate permease family	[P] KOG0236 Sulfate/bicarbonate/oxalate exchanger SAT-1 and related transporters (SLC26 family)	Sodium-independent sulfate anion transporter OS=Bos taurus GN=SLC26A11 PE=2 SV=1
CL2457.Contig1_All	0.493	1.486	1.59864	1.45561e-05	1.94293e-05
CL246.Contig1_All	0.19	2.153	3.51697	8.11575e-56	2.47266e-56		K19269//phosphoglycolate phosphatase [EC:3.1.3.18 3.1.3.48]+ko01200//Carbon metabolism+ko01100//Metabolic pathways+ko00630//Glyoxylate and dicarboxylate metabolism;K19269//phosphoglycolate phosphatase [EC:3.1.3.18 3.1.3.48]+ko01200//Carbon metabolism+ko01100//Metabolic pathways+ko00630//Glyoxylate and dicarboxylate metabolism;K19269//phosphoglycolate phosphatase [EC:3.1.3.18 3.1.3.48]+ko01200//Ca…		PREDICTED: phosphoglycolate phosphatase-like [Trichogramma pretiosum]	Haloacid dehalogenase-like hydrolase	[P] KOG2882 p-Nitrophenyl phosphatase	Glycerol-3-phosphate phosphatase OS=Gallus gallus GN=PGP PE=2 SV=1
CL2461.Contig2_All	0	0.813	4.47165	0.000525944	0.000818416
CL2469.Contig3_All	0.343	1.003	1.56458	3.63926e-05	5.02351e-05		K11415//NAD-dependent deacetylase sirtuin 5 [EC:3.5.1.-];K11415//NAD-dependent deacetylase sirtuin 5 [EC:3.5.1.-];K11415//NAD-dependent deacetylase sirtuin 5 [EC:3.5.1.-];K11415//NAD-dependent deacetylase sirtuin 5 [EC:3.5.1.-]		PREDICTED: NAD-dependent protein deacylase [Camponotus floridanus]	Sir2 family	[BK] KOG2684 Sirtuin 5 and related class III sirtuins (SIR2 family)	NAD-dependent protein deacylase OS=Daphnia pulex GN=DAPPUDRAFT_195469 PE=3 SV=1	GO:0036055//protein-succinyllysine desuccinylase activity;GO:0070403//NAD+ binding;GO:0008270//zinc ion binding;GO:0036054//protein-malonyllysine demalonylase activity;GO:0034979//NAD-dependent protein deacetylase activity;GO:0005739//mitochondrion
CL247.Contig3_All	0.626	1.366	1.1244	9.01566e-16	6.88033e-16			XM_014630344.1 PREDICTED: Dinoponera quadriceps transmembrane protein 185A (LOC106750194), mRNA	PREDICTED: transmembrane protein 185B [Bemisia tabaci]	Transmembrane Fragile-X-F protein	[S] KOG3879 Predicted membrane protein	Transmembrane protein 185A OS=Homo sapiens GN=TMEM185A PE=1 SV=2
CL2471.Contig3_All	15.79	53.286	1.75552	0	0		K00026//malate dehydrogenase [EC:1.1.1.37]+ko01200//Carbon metabolism+ko00020//Citrate cycle (TCA cycle)+ko00620//Pyruvate metabolism+ko01100//Metabolic pathways+ko00270//Cysteine and methionine metabolism+ko00630//Glyoxylate and dicarboxylate metabolism;K00026//malate dehydrogenase [EC:1.1.1.37]+ko01200//Carbon metabolism+ko00020//Citrate cycle (TCA cycle)+ko00620//Pyruvate metabolism+ko01100//M…	LM559567.1 Onchocerca flexuosa genome assembly O_flexuosa_Cordoba ,scaffold OFLC_contig0017735	malate mitochondrial [Lasius niger]	lactate/malate dehydrogenase, alpha/beta C-terminal domain	[C] KOG1494 NAD-dependent malate dehydrogenase	Malate dehydrogenase, mitochondrial OS=Bos taurus GN=MDH2 PE=1 SV=1	GO:0006099//tricarboxylic acid cycle;GO:0005975//carbohydrate metabolic process;GO:0030060//L-malate dehydrogenase activity;GO:0006108//malate metabolic process
CL249.Contig2_All	0.033	2.243	6.03151	2.84175e-158	3.32362e-159		K04863//voltage-dependent calcium channel beta-2+ko05414//Dilated cardiomyopathy (DCM)+ko05410//Hypertrophic cardiomyopathy (HCM)+ko05412//Arrhythmogenic right ventricular cardiomyopathy (ARVC)+ko04261//Adrenergic signaling in cardiomyocytes+ko04260//Cardiac muscle contraction+ko04010//MAPK signaling pathway+ko04921//Oxytocin signaling pathway;K04863//voltage-dependent calcium channel beta-2+ko05…	XM_007936346.1 PREDICTED: Orycteropus afer afer calcium channel, voltage-dependent, beta 2 subunit (CACNB2), transcript variant X7, mRNA	PREDICTED: voltage-dependent L-type calcium channel subunit beta-2 isoform X3 [Halyomorpha halys]	Guanylate kinase	[PT] KOG3812 L-type voltage-dependent Ca2+ channel, beta subunit	Voltage-dependent L-type calcium channel subunit beta-2 OS=Mus musculus GN=Cacnb2 PE=1 SV=1
CL2490.Contig3_All	3.356	7.346	1.12223	2.78061e-160	3.20677e-161		K20697//gram-negative bacteria-binding protein 1+ko04624//Toll and Imd signaling pathway;K20697//gram-negative bacteria-binding protein 1+ko04624//Toll and Imd signaling pathway;K20697//gram-negative bacteria-binding protein 1+ko04624//Toll and Imd signaling pathway;K20697//gram-negative bacteria-binding protein 1+ko04624//Toll and Imd signaling pathway;K20697//gram-negative bacteria-binding prot…	EF092021.1 Maconellicoccus hirsutus clone WHMH3718 gram negative bacteria binding protein 2-like protein mRNA, partial cds	PREDICTED: uncharacterized protein LOC109031452 [Bemisia tabaci]	WSC domain	[GO] KOG4157 beta-1,6-N-acetylglucosaminyltransferase, contains WSC domain	Beta-1,3-glucan-binding protein OS=Tenebrio molitor GN=GRP PE=1 SV=1	GO:0004553//hydrolase activity, hydrolyzing O-glycosyl compounds;GO:0005975//carbohydrate metabolic process
CL2501.Contig2_All	0.193	1.096	2.49863	1.09262e-57	3.22323e-58		K14442//ATP-dependent RNA helicase DHX36 [EC:3.6.4.13]+ko03018//RNA degradation;K14442//ATP-dependent RNA helicase DHX36 [EC:3.6.4.13]+ko03018//RNA degradation;K14442//ATP-dependent RNA helicase DHX36 [EC:3.6.4.13]+ko03018//RNA degradation;K14442//ATP-dependent RNA helicase DHX36 [EC:3.6.4.13]+ko03018//RNA degradation;K14442//ATP-dependent RNA helicase DHX36 [EC:3.6.4.13]+ko03018//RNA degradation	XM_021842077.1 PREDICTED: Aedes aegypti dosage compensation regulator (LOC5565549), mRNA	ATP-dependent RNA helicase DHX36-like [Nilaparvata lugens]	Oligonucleotide/oligosaccharide-binding (OB)-fold	[A] KOG0920 ATP-dependent RNA helicase A	ATP-dependent RNA helicase DHX36 OS=Mus musculus GN=Dhx36 PE=1 SV=2
CL2508.Contig1_All	2.803	7.643	1.44207	6.00922e-88	1.2332e-88				PREDICTED: uncharacterized protein LOC100167836 isoform X2 [Acyrthosiphon pisum]	THAP domain			GO:0003677//DNA binding
CL2508.Contig3_All	0.733	2.243	1.62301	2.53342e-17	1.82186e-17
CL2508.Contig4_All	0.893	2.563	1.51051	8.78062e-57	2.63037e-57				PREDICTED: uncharacterized protein LOC100167836 isoform X2 [Acyrthosiphon pisum]	THAP domain			GO:0003677//DNA binding
CL2510.Contig1_All	0	45.933	13.3944	0	0	bHLH	K15182//negative elongation factor E;K15182//negative elongation factor E;K15182//negative elongation factor E;K15182//negative elongation factor E;K15182//negative elongation factor E		PREDICTED: negative elongation factor E [Ceratosolen solmsi marchali]	RNA recognition motif. (a.k.a. RRM, RBD, or RNP domain)	[AJ] KOG0123 Polyadenylate-binding protein (RRM superfamily)	Negative elongation factor E OS=Drosophila melanogaster GN=Nelf-E PE=1 SV=1	GO:0003723//RNA binding;GO:0006355//regulation of transcription, DNA-templated;GO:0032021//NELF complex
CL2512.Contig3_All	0.996	2.96	1.55743	4.14016e-66	1.09624e-66		K13123//G patch domain-containing protein 1;K13123//G patch domain-containing protein 1;K13123//G patch domain-containing protein 1;K13123//G patch domain-containing protein 1;K13123//G patch domain-containing protein 1	XM_012383937.1 PREDICTED: Bombus impatiens uncharacterized LOC100749165 (LOC100749165), mRNA	PREDICTED: G patch domain-containing protein 1 [Rhinolophus sinicus]	LMBR1-like membrane protein	[A] KOG2138 Predicted RNA binding protein, contains G-patch domain	G patch domain-containing protein 1 OS=Bos taurus GN=GPATCH1 PE=2 SV=1
CL252.Contig1_All	0	0.17	5.38411	1.90632e-06	2.36321e-06			CP020677.1 Oryzias latipes strain Hd-rR chromosome 13 sequence	PREDICTED: uncharacterized protein LOC103518378 [Diaphorina citri]
CL2529.Contig2_All	0.326	0.97	1.56957	3.1449e-15	2.4585e-15		K04851//voltage-dependent calcium channel L type alpha-1D+ko04024//cAMP signaling pathway+ko04022//cGMP-PKG signaling pathway+ko04020//Calcium signaling pathway+ko05414//Dilated cardiomyopathy (DCM)+ko05410//Hypertrophic cardiomyopathy (HCM)+ko05412//Arrhythmogenic right ventricular cardiomyopathy (ARVC)+ko04218//Cellular senescence+ko04912//GnRH signaling pathway+ko04911//Insulin secretion+ko047…	XR_002500351.1 PREDICTED: Aedes aegypti muscle calcium channel subunit alpha-1 (LOC5574639), transcript variant X11, misc_RNA	PREDICTED: muscle calcium channel subunit alpha-1 isoform X1 [Nicrophorus vespilloides]	Ion transport protein	[PT] KOG2301 Voltage-gated Ca2+ channels, alpha1 subunits	Voltage-dependent calcium channel type D subunit alpha-1 OS=Drosophila melanogaster GN=Ca-alpha1D PE=1 SV=2
CL2529.Contig4_All	0.176	0.77	2.1202	8.16187e-18	5.7559e-18		K04851//voltage-dependent calcium channel L type alpha-1D+ko04024//cAMP signaling pathway+ko04022//cGMP-PKG signaling pathway+ko04020//Calcium signaling pathway+ko05414//Dilated cardiomyopathy (DCM)+ko05410//Hypertrophic cardiomyopathy (HCM)+ko05412//Arrhythmogenic right ventricular cardiomyopathy (ARVC)+ko04218//Cellular senescence+ko04912//GnRH signaling pathway+ko04911//Insulin secretion+ko047…	XR_002500351.1 PREDICTED: Aedes aegypti muscle calcium channel subunit alpha-1 (LOC5574639), transcript variant X11, misc_RNA	PREDICTED: muscle calcium channel subunit alpha-1 isoform X2 [Nicrophorus vespilloides]	Ion transport protein	[PT] KOG2301 Voltage-gated Ca2+ channels, alpha1 subunits	Voltage-dependent calcium channel type D subunit alpha-1 OS=Drosophila melanogaster GN=Ca-alpha1D PE=1 SV=2	GO:0005245//voltage-gated calcium channel activity;GO:0005891//voltage-gated calcium channel complex
CL2530.Contig1_All	0	0.153	4.62511	0.000252204	0.000378525
CL2531.Contig3_All	0.16	2.146	3.74509	2.1979e-85	4.65144e-86		K11657//remodeling and spacing factor 1;K22022//mucin-21	LM422703.1 Enterobius vermicularis genome assembly E_vermicularis_Canary_Islands ,scaffold EVEC_scaffold0008594	flocculin [Trichomonas vaginalis G3] >EAX95321.1 flocculin, putative [Trichomonas vaginalis G3]		[Y] KOG2992 Nucleolar GTPase/ATPase p130	Osteocalcin 2 OS=Diplodus sargus GN=bglap2 PE=1 SV=1	GO:0016021//integral component of membrane
CL2539.Contig4_All	0	2.27	9.80136	1.47116e-75	3.48601e-76	Others	K12881//THO complex subunit 4+ko03040//Spliceosome+ko03013//RNA transport+ko03015//mRNA surveillance pathway+ko05168//Herpes simplex infection;K12881//THO complex subunit 4+ko03040//Spliceosome+ko03013//RNA transport+ko03015//mRNA surveillance pathway+ko05168//Herpes simplex infection;K12881//THO complex subunit 4+ko03040//Spliceosome+ko03013//RNA transport+ko03015//mRNA surveillance pathway+ko05…		PREDICTED: THO complex subunit 4 [Rhagoletis zephyria]		[A] KOG0533 RRM motif-containing protein	THO complex subunit 4 OS=Bos taurus GN=ALYREF PE=2 SV=1	GO:0003723//RNA binding
CL2550.Contig1_All	0.17	1.23	2.8785	1.02952e-23	6.00593e-24	zf-LITAF-like	K12862//pleiotropic regulator 1+ko03040//Spliceosome;K12862//pleiotropic regulator 1+ko03040//Spliceosome;K12862//pleiotropic regulator 1+ko03040//Spliceosome;K12862//pleiotropic regulator 1+ko03040//Spliceosome;K12862//pleiotropic regulator 1+ko03040//Spliceosome	XM_005860490.2 PREDICTED: Myotis brandtii pleiotropic regulator 1 (PLRG1), transcript variant X1, mRNA	pleiotropic regulator 1 [Nilaparvata lugens]	WD domain, G-beta repeat	[A] KOG0285 Pleiotropic regulator 1	Pleiotropic regulator 1 OS=Mus musculus GN=Plrg1 PE=1 SV=1
CL2556.Contig2_All	0.186	0.756	2.05976	6.50687e-06	8.42711e-06					RNA binding domain
CL2556.Contig8_All	1.516	4.023	1.40464	2.88016e-64	7.79211e-65		K01148//poly(A)-specific ribonuclease [EC:3.1.13.4]+ko03018//RNA degradation;K01148//poly(A)-specific ribonuclease [EC:3.1.13.4]+ko03018//RNA degradation;K01148//poly(A)-specific ribonuclease [EC:3.1.13.4]+ko03018//RNA degradation;K01148//poly(A)-specific ribonuclease [EC:3.1.13.4]+ko03018//RNA degradation;K01148//poly(A)-specific ribonuclease [EC:3.1.13.4]+ko03018//RNA degradation		PREDICTED: poly(A)-specific ribonuclease PARN-like, partial [Neodiprion lecontei]	CAF1 family ribonuclease	[L] KOG1990 Poly(A)-specific exoribonuclease PARN	Poly(A)-specific ribonuclease PARN OS=Mus musculus GN=Parn PE=1 SV=1
CL2568.Contig3_All	2.103	4.99	1.24425	4.048e-116	6.42841e-117		K19347//SUN domain-containing protein 1/2;K19347//SUN domain-containing protein 1/2;K19347//SUN domain-containing protein 1/2;K19347//SUN domain-containing protein 1/2		uncharacterized protein LOC111050181 isoform X3 [Nilaparvata lugens]	Sad1 / UNC-like C-terminal	[D] KOG2687 Spindle pole body protein, contains UNC-84 domain	SUN domain-containing protein 1 OS=Homo sapiens GN=SUN1 PE=1 SV=3
CL2573.Contig4_All	0.886	5.683	2.67634	0	0	THAP	K05741//diaphanous 2+ko04810//Regulation of actin cytoskeleton;K05741//diaphanous 2+ko04810//Regulation of actin cytoskeleton;K05741//diaphanous 2+ko04810//Regulation of actin cytoskeleton;K05741//diaphanous 2+ko04810//Regulation of actin cytoskeleton;K05741//diaphanous 2+ko04810//Regulation of actin cytoskeleton		protein diaphanous, partial [Nilaparvata lugens]	Formin Homology 2 Domain	[TZ] KOG1924 RhoA GTPase effector DIA/Diaphanous	Protein diaphanous OS=Drosophila melanogaster GN=dia PE=2 SV=2
CL258.Contig2_All	0	13.95	11.4667	6.75751e-182	6.86769e-183					Sporozoite P67 surface antigen
CL258.Contig4_All	0.066	38.03	9.1993	0	0
CL2581.Contig2_All	1.456	4.246	1.55222	6.9023e-37	2.93048e-37
CL2587.Contig3_All	0.186	0.793	2.1081	4.55726e-06	5.84221e-06
CL2598.Contig1_All	0.283	2.12	2.90092	1.60093e-23	9.37417e-24
CL2598.Contig2_All	0.713	3.333	2.22687	6.51712e-121	9.88903e-122		K02857//rhomboid-related protein 1/2/3 [EC:3.4.21.105];K02857//rhomboid-related protein 1/2/3 [EC:3.4.21.105];K02857//rhomboid-related protein 1/2/3 [EC:3.4.21.105];K02857//rhomboid-related protein 1/2/3 [EC:3.4.21.105]	AY374428.1 Oncorhynchus clarki henshawi microsatellite Och10 sequence	protein rhomboid isoform X2 [Nilaparvata lugens]	Rhomboid family	[T] KOG2289 Rhomboid family proteins	Protein rhomboid OS=Drosophila melanogaster GN=rho PE=1 SV=2	GO:0004252//serine-type endopeptidase activity;GO:0016021//integral component of membrane
CL260.Contig4_All	0.293	0.943	1.70927	8.56307e-08	9.64371e-08
CL2600.Contig1_All	10.303	46.91	2.19302	0	0		K01648//ATP citrate (pro-S)-lyase [EC:2.3.3.8]+ko00020//Citrate cycle (TCA cycle)+ko01100//Metabolic pathways;K01648//ATP citrate (pro-S)-lyase [EC:2.3.3.8]+ko00020//Citrate cycle (TCA cycle)+ko01100//Metabolic pathways;K01648//ATP citrate (pro-S)-lyase [EC:2.3.3.8]+ko00020//Citrate cycle (TCA cycle)+ko01100//Metabolic pathways;K01648//ATP citrate (pro-S)-lyase [EC:2.3.3.8]+ko00020//Citrate cycle…	XM_015578678.1 PREDICTED: Dufourea novaeangliae ATP-citrate synthase (LOC107189980), transcript variant X2, mRNA	PREDICTED: ATP-citrate synthase [Diuraphis noxia] >XP_015379618.1 PREDICTED: ATP-citrate synthase [Diuraphis noxia] >XP_015379627.1 PREDICTED: ATP-citrate synthase [Diuraphis noxia]	ATP citrate lyase citrate-binding	[C] KOG1254 ATP-citrate lyase	ATP-citrate synthase OS=Mus musculus GN=Acly PE=1 SV=1	GO:0006101//citrate metabolic process;GO:0006085//acetyl-CoA biosynthetic process;GO:0003878//ATP citrate synthase activity;GO:0046872//metal ion binding;GO:0005524//ATP binding;GO:0048037//cofactor binding;GO:0005737//cytoplasm;GO:0006629//lipid metabolic process
CL2600.Contig3_All	51.393	145.766	1.50383	0	0		K01648//ATP citrate (pro-S)-lyase [EC:2.3.3.8]+ko00020//Citrate cycle (TCA cycle)+ko01100//Metabolic pathways;K01648//ATP citrate (pro-S)-lyase [EC:2.3.3.8]+ko00020//Citrate cycle (TCA cycle)+ko01100//Metabolic pathways;K01648//ATP citrate (pro-S)-lyase [EC:2.3.3.8]+ko00020//Citrate cycle (TCA cycle)+ko01100//Metabolic pathways;K01648//ATP citrate (pro-S)-lyase [EC:2.3.3.8]+ko00020//Citrate cycle…	XM_015578678.1 PREDICTED: Dufourea novaeangliae ATP-citrate synthase (LOC107189980), transcript variant X2, mRNA	PREDICTED: ATP-citrate synthase [Diuraphis noxia] >XP_015379618.1 PREDICTED: ATP-citrate synthase [Diuraphis noxia] >XP_015379627.1 PREDICTED: ATP-citrate synthase [Diuraphis noxia]	ATP citrate lyase citrate-binding	[C] KOG1254 ATP-citrate lyase	ATP-citrate synthase OS=Mus musculus GN=Acly PE=1 SV=1	GO:0006101//citrate metabolic process;GO:0006085//acetyl-CoA biosynthetic process;GO:0003878//ATP citrate synthase activity;GO:0046872//metal ion binding;GO:0005524//ATP binding;GO:0048037//cofactor binding;GO:0005737//cytoplasm;GO:0006629//lipid metabolic process
CL2608.Contig2_All	0.166	0.5	1.59148	8.11891e-05	0.000115915
CL261.Contig1_All	0.08	4.156	5.74784	6.85496e-67	1.79496e-67
CL261.Contig2_All	0.04	0.516	3.66287	1.33745e-21	8.2893e-22					Protein phosphatase inhibitor
CL261.Contig3_All	0.333	2.183	2.71774	1.9356e-98	3.56193e-99		K04707//E3 ubiquitin-protein ligase CBL [EC:2.3.2.27]+ko04144//Endocytosis+ko04910//Insulin signaling pathway+ko05100//Bacterial invasion of epithelial cells+ko04120//Ubiquitin mediated proteolysis+ko05200//Pathways in cancer+ko05205//Proteoglycans in cancer+ko04012//ErbB signaling pathway+ko05220//Chronic myeloid leukemia;K04707//E3 ubiquitin-protein ligase CBL [EC:2.3.2.27]+ko04144//Endocytosis…	XM_019056394.1 PREDICTED: Bemisia tabaci E3 ubiquitin-protein ligase CBL (LOC109040444), mRNA	PREDICTED: E3 ubiquitin-protein ligase CBL isoform X2 [Halyomorpha halys]	CBL proto-oncogene N-terminal domain 1	[V] KOG1785 Tyrosine kinase negative regulator CBL	E3 ubiquitin-protein ligase CBL-B OS=Homo sapiens GN=CBLB PE=1 SV=2	GO:0005634//nucleus;GO:0007166//cell surface receptor signaling pathway;GO:0023051//regulation of signaling;GO:0004842//ubiquitin-protein transferase activity;GO:0016874//ligase activity;GO:0001784//phosphotyrosine residue binding;GO:0005509//calcium ion binding;GO:0004871//signal transducer activity
CL261.Contig4_All	0.24	2.006	3.06644	1.16658e-64	3.13961e-65					Protein phosphatase inhibitor
CL2614.Contig1_All	4.56	11.97	1.37987	1.07063e-218	8.97235e-220		K03061//26S proteasome regulatory subunit T1+ko03050//Proteasome+ko05169//Epstein-Barr virus infection;K03061//26S proteasome regulatory subunit T1+ko03050//Proteasome+ko05169//Epstein-Barr virus infection;K03061//26S proteasome regulatory subunit T1+ko03050//Proteasome+ko05169//Epstein-Barr virus infection;K03061//26S proteasome regulatory subunit T1+ko03050//Proteasome+ko05169//Epstein-Barr vir…	XM_017055319.1 PREDICTED: Apis cerana 26S protease regulatory subunit 7 (LOC107996987), mRNA	PREDICTED: 26S protease regulatory subunit 7 [Cimex lectularius] >XP_014239192.1 PREDICTED: 26S protease regulatory subunit 7 [Cimex lectularius]	ATPase family associated with various cellular activities (AAA)	[O] KOG0729 26S proteasome regulatory complex, ATPase RPT1	26S proteasome regulatory subunit 7 OS=Xenopus laevis GN=psmc2 PE=2 SV=1	GO:0005524//ATP binding;GO:0036402//proteasome-activating ATPase activity;GO:0030163//protein catabolic process;GO:0005737//cytoplasm
CL2616.Contig1_All	0	1.65	6.47364	7.9767e-12	7.18857e-12		K16621//bone morphogenetic protein 7+ko04390//Hippo signaling pathway+ko04360//Axon guidance+ko04350//TGF-beta signaling pathway+ko04060//Cytokine-cytokine receptor interaction;K16621//bone morphogenetic protein 7+ko04390//Hippo signaling pathway+ko04360//Axon guidance+ko04350//TGF-beta signaling pathway+ko04060//Cytokine-cytokine receptor interaction;K16621//bone morphogenetic protein 7+ko04390/…		PREDICTED: protein 60A-like [Cephus cinctus]	Transforming growth factor beta like domain	[T] KOG3900 Transforming growth factor beta, bone morphogenetic protein and related proteins	Protein 60A OS=Drosophila melanogaster GN=gbb PE=1 SV=1	GO:0008083//growth factor activity;GO:0005576//extracellular region
CL2617.Contig1_All	2.21	5.12	1.2143	8.3929e-109	1.41585e-109		K21245//transcription factor SPT20 homolog+ko04140//Autophagy - animal;K21245//transcription factor SPT20 homolog+ko04140//Autophagy - animal;K21245//transcription factor SPT20 homolog+ko04140//Autophagy - animal;K21245//transcription factor SPT20 homolog+ko04140//Autophagy - animal		uncharacterized threonine-rich GPI-anchored glycoprotein PJ4664.02 isoform X1 [Zootermopsis nevadensis] >XP_021926228.1 uncharacterized threonine-rich GPI-anchored glycoprotein PJ4664.02 isoform X1 [Zootermopsis nevadensis] >XP_021926244.1 uncharacterized threonine-rich GPI-anchored glycoprotein PJ4664.02 isoform X1 [Zootermopsis nevadensis]	Spt20 family	[K] LSE3732 H Transcription factor	Uncharacterized protein DDB_G0285291 OS=Dictyostelium discoideum GN=DDB_G0285291 PE=4 SV=1
CL2617.Contig4_All	1.41	4.476	1.66916	1.8261e-162	2.07223e-163		K21245//transcription factor SPT20 homolog+ko04140//Autophagy - animal;K21245//transcription factor SPT20 homolog+ko04140//Autophagy - animal;K21245//transcription factor SPT20 homolog+ko04140//Autophagy - animal;K21245//transcription factor SPT20 homolog+ko04140//Autophagy - animal		uncharacterized threonine-rich GPI-anchored glycoprotein PJ4664.02 isoform X1 [Zootermopsis nevadensis] >XP_021926228.1 uncharacterized threonine-rich GPI-anchored glycoprotein PJ4664.02 isoform X1 [Zootermopsis nevadensis] >XP_021926244.1 uncharacterized threonine-rich GPI-anchored glycoprotein PJ4664.02 isoform X1 [Zootermopsis nevadensis]	Spt20 family	[K] LSE3732 H Transcription factor	Uncharacterized protein DDB_G0285291 OS=Dictyostelium discoideum GN=DDB_G0285291 PE=4 SV=1
CL2621.Contig1_All	1.91	5.49	1.5324	6.26048e-46	2.24493e-46		K16816//patatin-like phospholipase domain-containing protein 2 [EC:3.1.1.3]+ko04714//Thermogenesis+ko00561//Glycerolipid metabolism+ko01100//Metabolic pathways+ko04923//Regulation of lipolysis in adipocytes		Mitochondrial sodium/hydrogen exchanger NHA2 [Zootermopsis nevadensis]	Sodium/hydrogen exchanger family	[P] KOG3826 Na+/H+ antiporter	Sodium/hydrogen exchanger 9B1 OS=Mus musculus GN=Slc9b1 PE=1 SV=1
CL263.Contig2_All	0	3.53	9.59573	1.30108e-67	3.37151e-68
CL263.Contig5_All	0	11.746	11.0995	2.45018e-150	3.04675e-151
CL263.Contig7_All	15.56	46.543	1.58504	1.65613e-290	1.04588e-291
CL2637.Contig2_All	0.13	2.533	4.29875	5.98056e-56	1.81692e-56					Domain of unknown function (DUF4409)
CL2639.Contig3_All	6.913	24.743	1.84007	0	0		K12898//heterogeneous nuclear ribonucleoprotein F/H;K12898//heterogeneous nuclear ribonucleoprotein F/H;K12898//heterogeneous nuclear ribonucleoprotein F/H;K12898//heterogeneous nuclear ribonucleoprotein F/H;K12898//heterogeneous nuclear ribonucleoprotein F/H		PREDICTED: heterogeneous nuclear ribonucleoprotein H [Apis mellifera] >XP_006568317.1 PREDICTED: heterogeneous nuclear ribonucleoprotein H [Apis mellifera]	RNA recognition motif. (a.k.a. RRM, RBD, or RNP domain)	[A] KOG4211 Splicing factor hnRNP-F and related RNA-binding proteins	Heterogeneous nuclear ribonucleoprotein H OS=Mus musculus GN=Hnrnph1 PE=1 SV=3	GO:0003723//RNA binding
CL2647.Contig3_All	6.253	21.28	1.76215	0	0		K11858//ubiquitin carboxyl-terminal hydrolase 48 [EC:3.4.19.12];K11858//ubiquitin carboxyl-terminal hydrolase 48 [EC:3.4.19.12];K11858//ubiquitin carboxyl-terminal hydrolase 48 [EC:3.4.19.12];K11858//ubiquitin carboxyl-terminal hydrolase 48 [EC:3.4.19.12];K11858//ubiquitin carboxyl-terminal hydrolase 48 [EC:3.4.19.12]	AC183522.4 Mus musculus BAC clone RP24-376H9 from chromosome y, complete sequence	ubiquitin carboxyl-terminal hydrolase 48-like isoform X1 [Zootermopsis nevadensis]	Ubiquitin carboxyl-terminal hydrolase	[O] KOG1863 Ubiquitin carboxyl-terminal hydrolase	Ubiquitin carboxyl-terminal hydrolase 48 OS=Homo sapiens GN=USP48 PE=1 SV=1
CL265.Contig3_All	0.576	1.806	1.65743	1.53811e-57	4.55246e-58		K04497//groucho+ko04310//Wnt signaling pathway+ko04013//MAPK signaling pathway - fly+ko04330//Notch signaling pathway;K04497//groucho+ko04310//Wnt signaling pathway+ko04013//MAPK signaling pathway - fly+ko04330//Notch signaling pathway;K04497//groucho+ko04310//Wnt signaling pathway+ko04013//MAPK signaling pathway - fly+ko04330//Notch signaling pathway;K04497//groucho+ko04310//Wnt signaling pathwa…	XM_019053146.1 PREDICTED: Bemisia tabaci transducin-like enhancer protein 4 (LOC109038162), transcript variant X3, mRNA	PREDICTED: transducin-like enhancer protein 4 isoform X6 [Cimex lectularius]	Groucho/TLE N-terminal Q-rich domain	[B] KOG0639 Transducin-like enhancer of split protein (contains WD40 repeats)	Transducin-like enhancer protein 4 OS=Xenopus laevis GN=tle4 PE=1 SV=2
CL2652.Contig1_All	0	4.49	10.29	3.77469e-98	6.97908e-99	Others	K10523//speckle-type POZ protein+ko04341//Hedgehog signaling pathway - fly+ko04340//Hedgehog signaling pathway;K10523//speckle-type POZ protein+ko04341//Hedgehog signaling pathway - fly+ko04340//Hedgehog signaling pathway;K10523//speckle-type POZ protein+ko04341//Hedgehog signaling pathway - fly+ko04340//Hedgehog signaling pathway;K10523//speckle-type POZ protein+ko04341//Hedgehog signaling pathw…		PREDICTED: speckle-type POZ protein isoform X2 [Cyphomyrmex costatus]	BTB/POZ domain	[DR] KOG1987 Speckle-type POZ protein SPOP and related proteins with TRAF, MATH and BTB/POZ domains	Protein roadkill OS=Drosophila melanogaster GN=rdx PE=1 SV=2
CL2652.Contig3_All	1.216	17.806	3.88621	0	0	Others	K10523//speckle-type POZ protein+ko04341//Hedgehog signaling pathway - fly+ko04340//Hedgehog signaling pathway;K10523//speckle-type POZ protein+ko04341//Hedgehog signaling pathway - fly+ko04340//Hedgehog signaling pathway;K10523//speckle-type POZ protein+ko04341//Hedgehog signaling pathway - fly+ko04340//Hedgehog signaling pathway;K10523//speckle-type POZ protein+ko04341//Hedgehog signaling pathw…		PREDICTED: speckle-type POZ protein isoform X2 [Cyphomyrmex costatus]	BTB/POZ domain	[DR] KOG1987 Speckle-type POZ protein SPOP and related proteins with TRAF, MATH and BTB/POZ domains	Protein roadkill OS=Drosophila melanogaster GN=rdx PE=1 SV=2
CL266.Contig5_All	1.373	3.056	1.15657	4.11726e-43	1.55203e-43		K16833//protein phosphatase inhibitor 2;K16833//protein phosphatase inhibitor 2;K16833//protein phosphatase inhibitor 2;K16833//protein phosphatase inhibitor 2	LL720180.1 Hydatigera taeniaeformis genome assembly H_taeniaeformis_Canary_Islands ,scaffold TTAC_scaffold0001016	PREDICTED: protein phosphatase inhibitor 2-like [Bemisia tabaci]	Protein phosphatase inhibitor 2 (IPP-2)	[OT] KOG4041 Protein phosphatase 1, regulatory (inhibitor) subunit PPP1R2	Uncharacterized protein DDB_G0271670 OS=Dictyostelium discoideum GN=DDB_G0271670 PE=3 SV=1	GO:0004864//protein phosphatase inhibitor activity;GO:0043666//regulation of phosphoprotein phosphatase activity;GO:0009966//regulation of signal transduction
CL266.Contig7_All	5.616	11.52	1.02425	5.09098e-71	1.26334e-71		K07374//tubulin alpha+ko04145//Phagosome+ko05130//Pathogenic Escherichia coli infection+ko04210//Apoptosis+ko04540//Gap junction+ko04530//Tight junction	XR_001339510.1 PREDICTED: Trichogramma pretiosum MIP18 family protein CG30152 (LOC106657372), transcript variant X2, misc_RNA	PREDICTED: MIP18 family protein CG30152 [Amyelois transitella]	Domain of unknown function DUF59	[S] KOG3381 Uncharacterized conserved protein	MIP18 family protein FAM96A OS=Mus musculus GN=Fam96a PE=1 SV=1
CL2666.Contig2_All	0.456	2.71	2.56757	6.66346e-237	5.16419e-238		K00665//fatty acid synthase, animal type [EC:2.3.1.85]+ko04910//Insulin signaling pathway+ko00061//Fatty acid biosynthesis+ko04152//AMPK signaling pathway+ko01100//Metabolic pathways+ko01212//Fatty acid metabolism;K00665//fatty acid synthase, animal type [EC:2.3.1.85]+ko04910//Insulin signaling pathway+ko00061//Fatty acid biosynthesis+ko04152//AMPK signaling pathway+ko01100//Metabolic pathways+ko…		PREDICTED: fatty acid synthase isoform X2 [Acyrthosiphon pisum]	Acyl transferase domain	[I] KOG1202 Animal-type fatty acid synthase and related proteins	Fatty acid synthase OS=Bos taurus GN=FASN PE=2 SV=1	GO:0016491//oxidoreductase activity
CL2666.Contig3_All	1.473	4.286	1.52853	1.92245e-192	1.84305e-193		K00665//fatty acid synthase, animal type [EC:2.3.1.85]+ko04910//Insulin signaling pathway+ko00061//Fatty acid biosynthesis+ko04152//AMPK signaling pathway+ko01100//Metabolic pathways+ko01212//Fatty acid metabolism;K00665//fatty acid synthase, animal type [EC:2.3.1.85]+ko04910//Insulin signaling pathway+ko00061//Fatty acid biosynthesis+ko04152//AMPK signaling pathway+ko01100//Metabolic pathways+ko…		PREDICTED: fatty acid synthase isoform X2 [Acyrthosiphon pisum]	Acyl transferase domain	[I] KOG1202 Animal-type fatty acid synthase and related proteins	Fatty acid synthase OS=Bos taurus GN=FASN PE=2 SV=1	GO:0016491//oxidoreductase activity
CL2666.Contig5_All	0.086	0.9	3.33627	5.42953e-104	9.5135e-105		K00665//fatty acid synthase, animal type [EC:2.3.1.85]+ko04910//Insulin signaling pathway+ko00061//Fatty acid biosynthesis+ko04152//AMPK signaling pathway+ko01100//Metabolic pathways+ko01212//Fatty acid metabolism;K00665//fatty acid synthase, animal type [EC:2.3.1.85]+ko04910//Insulin signaling pathway+ko00061//Fatty acid biosynthesis+ko04152//AMPK signaling pathway+ko01100//Metabolic pathways+ko…		PREDICTED: fatty acid synthase isoform X2 [Acyrthosiphon pisum]	Acyl transferase domain	[I] KOG1202 Animal-type fatty acid synthase and related proteins	Fatty acid synthase OS=Bos taurus GN=FASN PE=2 SV=1	GO:0016491//oxidoreductase activity
CL2667.Contig5_All	0.676	2.006	1.58646	7.23236e-23	4.30247e-23		K01052//lysosomal acid lipase/cholesteryl ester hydrolase [EC:3.1.1.13]+ko04142//Lysosome+ko04979//Cholesterol metabolism+ko00100//Steroid biosynthesis;K01052//lysosomal acid lipase/cholesteryl ester hydrolase [EC:3.1.1.13]+ko04142//Lysosome+ko04979//Cholesterol metabolism+ko00100//Steroid biosynthesis;K01052//lysosomal acid lipase/cholesteryl ester hydrolase [EC:3.1.1.13]+ko04142//Lysosome+ko049…		lipase 3-like [Nilaparvata lugens] >XP_022187147.1 lipase 3-like [Nilaparvata lugens] >XP_022187148.1 lipase 3-like [Nilaparvata lugens]	Partial alpha/beta-hydrolase lipase region	[I] KOG2624 Triglyceride lipase-cholesterol esterase	Lipase 3 OS=Drosophila melanogaster GN=Lip3 PE=2 SV=1
CL2668.Contig2_All	0	0.206	4.72202	0.000152378	0.000223764
CL267.Contig1_All	0.163	0.676	2.06647	3.69755e-09	3.83018e-09					Band 3 cytoplasmic domain
CL267.Contig2_All	0.15	1.08	2.88431	1.32814e-14	1.06179e-14
CL268.Contig1_All	0	0.573	8.44655	5.6965e-36	2.47179e-36	zf-GATA	K18595//echinoderm microtubule-associated protein-like 1/2;K18595//echinoderm microtubule-associated protein-like 1/2;K18595//echinoderm microtubule-associated protein-like 1/2;K18595//echinoderm microtubule-associated protein-like 1/2;K18595//echinoderm microtubule-associated protein-like 1/2	XM_022334604.1 PREDICTED: Nilaparvata lugens echinoderm microtubule-associated protein-like 2 (LOC111048674), mRNA	echinoderm microtubule-associated protein-like 2 isoform X2 [Myzus persicae]	HELP motif	[S] KOG2106 Uncharacterized conserved protein, contains HELP and WD40 domains	Echinoderm microtubule-associated protein-like 1 OS=Mus musculus GN=Eml1 PE=1 SV=1
CL2680.Contig4_All	2.333	5.88	1.33377	6.92976e-113	1.12835e-113				PREDICTED: uncharacterized protein LOC106692791 isoform X2 [Halyomorpha halys] >XP_014294451.1 PREDICTED: uncharacterized protein LOC106692791 isoform X2 [Halyomorpha halys] >XP_014294452.1 PREDICTED: uncharacterized protein LOC106692791 isoform X2 [Halyomorpha halys] >XP_014294453.1 PREDICTED: uncharacterized protein LOC106692791 isoform X2 [Halyomorpha halys]	Protein of unknown function (DUF229)
CL2686.Contig1_All	0.23	0.653	1.47585	1.43259e-06	1.76022e-06		K01298//carboxypeptidase A2 [EC:3.4.17.15]+ko04974//Protein digestion and absorption+ko04972//Pancreatic secretion;K01298//carboxypeptidase A2 [EC:3.4.17.15]+ko04974//Protein digestion and absorption+ko04972//Pancreatic secretion;K01298//carboxypeptidase A2 [EC:3.4.17.15]+ko04974//Protein digestion and absorption+ko04972//Pancreatic secretion;K01298//carboxypeptidase A2 [EC:3.4.17.15]+ko04974//Pr…		PREDICTED: carboxypeptidase B-like [Aedes albopictus]	Zinc carboxypeptidase	[S] KOG2650 Zinc carboxypeptidase	Carboxypeptidase B OS=Astacus astacus PE=1 SV=1	GO:0008270//zinc ion binding;GO:0004181//metallocarboxypeptidase activity
CL2687.Contig1_All	3.933	29.616	2.92873	8.96493e-167	9.88093e-168		K02135//F-type H+-transporting ATPase subunit epsilon+ko04714//Thermogenesis+ko00190//Oxidative phosphorylation+ko05010//Alzheimer disease+ko05012//Parkinson disease+ko05016//Huntington disease+ko01100//Metabolic pathways;K02135//F-type H+-transporting ATPase subunit epsilon+ko04714//Thermogenesis+ko00190//Oxidative phosphorylation+ko05010//Alzheimer disease+ko05012//Parkinson disease+ko05016//Hu…		PREDICTED: ATP synthase subunit epsilon, mitochondrial-like isoform X2 [Bemisia tabaci]		[C] KOG3495 Mitochondrial F1F0-ATP synthase, subunit epsilon/ATP15	Protein stunted OS=Drosophila melanogaster GN=sun PE=1 SV=1	GO:0015986//ATP synthesis coupled proton transport;GO:0000275//mitochondrial proton-transporting ATP synthase complex, catalytic core F(1);GO:0046933//proton-transporting ATP synthase activity, rotational mechanism
CL2693.Contig3_All	1.64	7.393	2.16806	0	0		K16601//tubulin polyglutamylase TTLL4 [EC:6.-.-.-];K16601//tubulin polyglutamylase TTLL4 [EC:6.-.-.-];K16601//tubulin polyglutamylase TTLL4 [EC:6.-.-.-];K16601//tubulin polyglutamylase TTLL4 [EC:6.-.-.-]		tubulin polyglutamylase TTLL4-like [Nilaparvata lugens]	Tubulin-tyrosine ligase family	[O] KOG2156 Tubulin-tyrosine ligase-related protein	Tubulin polyglutamylase TTLL4 OS=Homo sapiens GN=TTLL4 PE=1 SV=2	GO:0018095//protein polyglutamylation
CL2694.Contig1_All	0	0.076	5.73092	8.49802e-08	9.56675e-08			LN595932.1 Cyprinus carpio genome assembly common carp genome ,scaffold 000002195
CL270.Contig11_All	0	1.106	10.1902	4.57618e-93	8.8788e-94	RHD	K17335//nuclear factor of activated T-cells 5;K17335//nuclear factor of activated T-cells 5;K17335//nuclear factor of activated T-cells 5;K17335//nuclear factor of activated T-cells 5		PREDICTED: nuclear factor of activated T-cells 5 isoform X1 [Bemisia tabaci]	Rel homology DNA-binding domain	[KT] TWOG0134 Tonicity-responsive enhancer-binding protein/Rel domain-containing transcription factor	Nuclear factor of activated T-cells 5 OS=Rattus norvegicus GN=Nfat5 PE=1 SV=1
CL270.Contig12_All	0.27	0.55	1.02143	4.78101e-08	5.2877e-08		K12377//torso-like protein+ko04013//MAPK signaling pathway - fly;K12377//torso-like protein+ko04013//MAPK signaling pathway - fly;K12377//torso-like protein+ko04013//MAPK signaling pathway - fly;K12377//torso-like protein+ko04013//MAPK signaling pathway - fly;K12377//torso-like protein+ko04013//MAPK signaling pathway - fly		PREDICTED: torso-like protein isoform X2 [Diuraphis noxia]	MAC/Perforin domain		Torso-like protein OS=Drosophila melanogaster GN=tsl PE=1 SV=2
CL270.Contig14_All	0.21	0.46	1.14348	2.13919e-13	1.79669e-13	RHD	K17335//nuclear factor of activated T-cells 5;K17335//nuclear factor of activated T-cells 5;K17335//nuclear factor of activated T-cells 5;K17335//nuclear factor of activated T-cells 5		PREDICTED: nuclear factor of activated T-cells 5 isoform X1 [Bemisia tabaci]	Rel homology DNA-binding domain	[KT] TWOG0134 Tonicity-responsive enhancer-binding protein/Rel domain-containing transcription factor	Nuclear factor of activated T-cells 5 OS=Rattus norvegicus GN=Nfat5 PE=1 SV=1
CL270.Contig2_All	0.036	0.116	1.62633	9.47631e-05	0.000136119	RHD	K17335//nuclear factor of activated T-cells 5;K17335//nuclear factor of activated T-cells 5;K17335//nuclear factor of activated T-cells 5;K17335//nuclear factor of activated T-cells 5		PREDICTED: nuclear factor of activated T-cells 5 isoform X3 [Bemisia tabaci] >XP_018905166.1 PREDICTED: nuclear factor of activated T-cells 5 isoform X3 [Bemisia tabaci]	Rel homology DNA-binding domain	[KT] TWOG0134 Tonicity-responsive enhancer-binding protein/Rel domain-containing transcription factor	Nuclear factor of activated T-cells 5 OS=Rattus norvegicus GN=Nfat5 PE=1 SV=1
CL270.Contig6_All	0	0.07	4.50575	0.000449538	0.000693853		K12377//torso-like protein+ko04013//MAPK signaling pathway - fly;K12377//torso-like protein+ko04013//MAPK signaling pathway - fly;K12377//torso-like protein+ko04013//MAPK signaling pathway - fly;K12377//torso-like protein+ko04013//MAPK signaling pathway - fly;K12377//torso-like protein+ko04013//MAPK signaling pathway - fly		PREDICTED: torso-like protein isoform X2 [Diuraphis noxia]	MAC/Perforin domain		Torso-like protein OS=Drosophila melanogaster GN=tsl PE=1 SV=2
CL2707.Contig2_All	0.516	1.446	1.48987	3.85714e-15	3.02241e-15		K11434//type I protein arginine methyltransferase [EC:2.1.1.319]+ko04068//FoxO signaling pathway+ko04922//Glucagon signaling pathway;K11434//type I protein arginine methyltransferase [EC:2.1.1.319]+ko04068//FoxO signaling pathway+ko04922//Glucagon signaling pathway;K11434//type I protein arginine methyltransferase [EC:2.1.1.319]+ko04068//FoxO signaling pathway+ko04922//Glucagon signaling pathway;…	XM_018481553.1 PREDICTED: Trachymyrmex septentrionalis protein arginine N-methyltransferase 1 (LOC108745413), transcript variant X2, mRNA	probable protein arginine N-methyltransferase 6 [Myzus persicae]	Ribosomal protein L11 methyltransferase (PrmA)	[OKT] KOG1499 Protein arginine N-methyltransferase PRMT1 and related enzymes	Protein arginine N-methyltransferase 1 OS=Homo sapiens GN=PRMT1 PE=1 SV=2	GO:0008168//methyltransferase activity;GO:0006479//protein methylation
CL2708.Contig1_All	0.333	1.56	2.24083	3.88116e-28	2.00935e-28				hypothetical protein TRFO_21751 [Tritrichomonas foetus]
CL271.Contig2_All	0	1.283	9.41204	3.42295e-61	9.58798e-62				uncharacterized protein LOC107453468 isoform X1 [Parasteatoda tepidariorum] >XP_015925801.1 uncharacterized protein LOC107453468 isoform X1 [Parasteatoda tepidariorum]
CL271.Contig7_All	0.226	1.176	2.38696	1.09964e-45	3.95991e-46
CL2716.Contig1_All	1.593	3.203	1.01379	1.15327e-06	1.40586e-06
CL2717.Contig3_All	1.543	8.776	2.49339	7.08027e-107	1.21365e-107	zf-C2H2	K18749//protein LSM14;K18749//protein LSM14;K18749//protein LSM14;K18749//protein LSM14;K18749//protein LSM14	XM_002024075.1 Drosophila persimilis GL22731 (Dper\GL22731), mRNA	PREDICTED: protein LSM14 homolog A isoform X1 [Orussus abietinus]	Scd6-like Sm domain	[U] KOG1073 Uncharacterized mRNA-associated protein RAP55	Signal transducer and activator of transcription C OS=Dictyostelium discoideum GN=dstC PE=1 SV=1
CL2717.Contig4_All	0.603	1.38	1.20887	9.22003e-08	1.04206e-07	zf-C2H2	K18749//protein LSM14;K18749//protein LSM14;K18749//protein LSM14;K18749//protein LSM14;K18749//protein LSM14	XM_002024075.1 Drosophila persimilis GL22731 (Dper\GL22731), mRNA	PREDICTED: protein LSM14 homolog A isoform X1 [Orussus abietinus]	Scd6-like Sm domain	[U] KOG1073 Uncharacterized mRNA-associated protein RAP55	Signal transducer and activator of transcription C OS=Dictyostelium discoideum GN=dstC PE=1 SV=1
CL2724.Contig1_All	2.693	6.49	1.26764	4.53917e-93	8.80205e-94		K17584//phosphorylated CTD-interacting factor 1		PREDICTED: uncharacterized protein LOC100569598 isoform X1 [Acyrthosiphon pisum] >XP_016656819.1 PREDICTED: uncharacterized protein LOC100569598 isoform X1 [Acyrthosiphon pisum]	Domain of unknown function (DUF4808)
CL2737.Contig2_All	0	2.88	9.64805	1.48378e-69	3.75946e-70				PREDICTED: uncharacterized protein LOC109029670 [Bemisia tabaci] >XP_018895788.1 PREDICTED: uncharacterized protein LOC109029670 [Bemisia tabaci]	PMP-22/EMP/MP20/Claudin tight junction			GO:0016021//integral component of membrane
CL2737.Contig3_All	0.14	1.033	2.84946	1.85925e-22	1.11858e-22				PREDICTED: uncharacterized protein LOC109029670 [Bemisia tabaci] >XP_018895788.1 PREDICTED: uncharacterized protein LOC109029670 [Bemisia tabaci]	PMP-22/EMP/MP20/Claudin tight junction			GO:0016021//integral component of membrane
CL2749.Contig2_All	0.293	6.89	4.55422	4.73161e-158	5.54422e-159	zf-C2H2	K09228//KRAB domain-containing zinc finger protein;K09228//KRAB domain-containing zinc finger protein;K09228//KRAB domain-containing zinc finger protein	XM_015931131.1 PREDICTED: Tetranychus urticae uncharacterized LOC107363867 (LOC107363867), mRNA	PREDICTED: Krueppel-like factor 3 isoform X3 [Eufriesea mexicana]	Zinc finger, C2H2 type	[R] KOG1721 FOG: Zn-finger	Zinc finger protein 468 OS=Homo sapiens GN=ZNF468 PE=2 SV=1
CL275.Contig2_All	0.04	6.64	7.31605	1.76298e-253	1.29157e-254		K15340//DNA cross-link repair 1A protein;K15340//DNA cross-link repair 1A protein;K15340//DNA cross-link repair 1A protein;K15340//DNA cross-link repair 1A protein		predicted protein [Nematostella vectensis] >EDO43089.1 predicted protein, partial [Nematostella vectensis]	DNA repair metallo-beta-lactamase	[L] KOG1361 Predicted hydrolase involved in interstrand cross-link repair	DNA cross-link repair 1A protein OS=Gallus gallus GN=DCLRE1A PE=1 SV=1	GO:0000784//nuclear chromosome, telomeric region;GO:0003684//damaged DNA binding;GO:0036297//interstrand cross-link repair;GO:0035312//5'-3' exodeoxyribonuclease activity;GO:0031848//protection from non-homologous end joining at telomere;GO:0006303//double-strand break repair via nonhomologous end joining
CL2755.Contig1_All	0	0.94	7.0879	9.52089e-17	6.99993e-17
CL2758.Contig2_All	0.043	0.15	1.8269	1.76124e-09	1.78709e-09			AC159334.9 Mus musculus 10 BAC RP24-369D19 (Roswell Park Cancer Institute (C57BL/6J Male) Mouse BAC Library) complete sequence	hypothetical protein TRFO_13840 [Tritrichomonas foetus]
CL276.Contig6_All	0.576	1.393	1.26904	1.67182e-17	1.19245e-17					Protein of unknown function DUF3258
CL277.Contig1_All	0.263	0.736	1.46046	7.65791e-08	8.59102e-08		K00858//NAD+ kinase [EC:2.7.1.23]+ko00760//Nicotinate and nicotinamide metabolism+ko01100//Metabolic pathways;K00858//NAD+ kinase [EC:2.7.1.23]+ko00760//Nicotinate and nicotinamide metabolism+ko01100//Metabolic pathways;K00858//NAD+ kinase [EC:2.7.1.23]+ko00760//Nicotinate and nicotinamide metabolism+ko01100//Metabolic pathways;K00858//NAD+ kinase [EC:2.7.1.23]+ko00760//Nicotinate and nicotinamid…		PREDICTED: NAD kinase-like isoform X5 [Bemisia tabaci]	ATP-NAD kinase	[G] KOG2178 Predicted sugar kinase	NAD kinase OS=Mus musculus GN=Nadk PE=1 SV=2	GO:0003951//NAD+ kinase activity;GO:0006741//NADP biosynthetic process;GO:0019674//NAD metabolic process
CL277.Contig4_All	0	0.12	5.41894	1.43451e-06	1.76273e-06		K00858//NAD+ kinase [EC:2.7.1.23]+ko00760//Nicotinate and nicotinamide metabolism+ko01100//Metabolic pathways;K00858//NAD+ kinase [EC:2.7.1.23]+ko00760//Nicotinate and nicotinamide metabolism+ko01100//Metabolic pathways;K00858//NAD+ kinase [EC:2.7.1.23]+ko00760//Nicotinate and nicotinamide metabolism+ko01100//Metabolic pathways;K00858//NAD+ kinase [EC:2.7.1.23]+ko00760//Nicotinate and nicotinamid…		PREDICTED: NAD kinase-like isoform X1 [Bemisia tabaci]	ATP-NAD kinase	[G] KOG2178 Predicted sugar kinase	NAD kinase OS=Mus musculus GN=Nadk PE=1 SV=2	GO:0003951//NAD+ kinase activity;GO:0006741//NADP biosynthetic process;GO:0019674//NAD metabolic process
CL2770.Contig10_All	1.08	2.706	1.33942	2.58492e-38	1.06993e-38	Others	K12887//heterogeneous nuclear ribonucleoprotein M+ko03040//Spliceosome;K12887//heterogeneous nuclear ribonucleoprotein M+ko03040//Spliceosome;K12887//heterogeneous nuclear ribonucleoprotein M+ko03040//Spliceosome;K12887//heterogeneous nuclear ribonucleoprotein M+ko03040//Spliceosome;K12887//heterogeneous nuclear ribonucleoprotein M+ko03040//Spliceosome	XM_018464524.1 PREDICTED: Agrilus planipennis myelin expression factor 2 (LOC108733385), mRNA	PREDICTED: heterogeneous nuclear ribonucleoprotein M-like isoform X5 [Apis dorsata] >XP_006608854.1 PREDICTED: heterogeneous nuclear ribonucleoprotein M-like isoform X6 [Apis dorsata]	RNA recognition motif. (a.k.a. RRM, RBD, or RNP domain)	[A] KOG4212 RNA-binding protein hnRNP-M	Heterogeneous nuclear ribonucleoprotein M OS=Rattus norvegicus GN=Hnrnpm PE=1 SV=4
CL2770.Contig12_All	0.826	1.813	1.1356	1.86743e-20	1.20125e-20		K13291//terminal uridylyltransferase [EC:2.7.7.52];K13291//terminal uridylyltransferase [EC:2.7.7.52];K18709//speckle targeted PIP5K1A-regulated poly(A) polymerase [EC:2.7.7.19 2.7.7.52];K18060//poly(A) RNA polymerase, mitochondrial [EC:2.7.7.19];K18709//speckle targeted PIP5K1A-regulated poly(A) polymerase [EC:2.7.7.19 2.7.7.52]		PREDICTED: uncharacterized protein LOC107035686 [Diachasma alloeum]	Cid1 family poly A polymerase
CL2770.Contig14_All	0.076	0.19	1.34503	0.000111226	0.000160734	Others	K12887//heterogeneous nuclear ribonucleoprotein M+ko03040//Spliceosome;K12887//heterogeneous nuclear ribonucleoprotein M+ko03040//Spliceosome;K12887//heterogeneous nuclear ribonucleoprotein M+ko03040//Spliceosome;K12887//heterogeneous nuclear ribonucleoprotein M+ko03040//Spliceosome;K12887//heterogeneous nuclear ribonucleoprotein M+ko03040//Spliceosome	XM_018464524.1 PREDICTED: Agrilus planipennis myelin expression factor 2 (LOC108733385), mRNA	PREDICTED: heterogeneous nuclear ribonucleoprotein M [Bemisia tabaci]	RNA recognition motif. (a.k.a. RRM, RBD, or RNP domain)	[A] KOG4212 RNA-binding protein hnRNP-M	Heterogeneous nuclear ribonucleoprotein M OS=Rattus norvegicus GN=Hnrnpm PE=1 SV=4
CL2770.Contig16_All	0	0.416	7.58932	3.07488e-22	1.86599e-22	Others	K12887//heterogeneous nuclear ribonucleoprotein M+ko03040//Spliceosome;K12887//heterogeneous nuclear ribonucleoprotein M+ko03040//Spliceosome;K12887//heterogeneous nuclear ribonucleoprotein M+ko03040//Spliceosome;K12887//heterogeneous nuclear ribonucleoprotein M+ko03040//Spliceosome;K12887//heterogeneous nuclear ribonucleoprotein M+ko03040//Spliceosome	XM_018464524.1 PREDICTED: Agrilus planipennis myelin expression factor 2 (LOC108733385), mRNA	PREDICTED: heterogeneous nuclear ribonucleoprotein M [Bemisia tabaci]	RNA recognition motif. (a.k.a. RRM, RBD, or RNP domain)	[A] KOG4212 RNA-binding protein hnRNP-M	Heterogeneous nuclear ribonucleoprotein M OS=Rattus norvegicus GN=Hnrnpm PE=1 SV=4
CL2770.Contig17_All	1.153	2.696	1.2151	2.48538e-33	1.14273e-33		K13291//terminal uridylyltransferase [EC:2.7.7.52];K13291//terminal uridylyltransferase [EC:2.7.7.52];K18709//speckle targeted PIP5K1A-regulated poly(A) polymerase [EC:2.7.7.19 2.7.7.52];K18060//poly(A) RNA polymerase, mitochondrial [EC:2.7.7.19];K18709//speckle targeted PIP5K1A-regulated poly(A) polymerase [EC:2.7.7.19 2.7.7.52]		uncharacterized protein LOC105687080 [Athalia rosae]	Cid1 family poly A polymerase
CL2770.Contig19_All	0.086	5.576	6.01743	4.67748e-300	2.85733e-301	Others	K12887//heterogeneous nuclear ribonucleoprotein M+ko03040//Spliceosome;K12887//heterogeneous nuclear ribonucleoprotein M+ko03040//Spliceosome;K12887//heterogeneous nuclear ribonucleoprotein M+ko03040//Spliceosome;K12887//heterogeneous nuclear ribonucleoprotein M+ko03040//Spliceosome;K12887//heterogeneous nuclear ribonucleoprotein M+ko03040//Spliceosome	XM_018464524.1 PREDICTED: Agrilus planipennis myelin expression factor 2 (LOC108733385), mRNA	PREDICTED: heterogeneous nuclear ribonucleoprotein M-like isoform X5 [Apis dorsata] >XP_006608854.1 PREDICTED: heterogeneous nuclear ribonucleoprotein M-like isoform X6 [Apis dorsata]	RNA recognition motif. (a.k.a. RRM, RBD, or RNP domain)	[A] KOG4212 RNA-binding protein hnRNP-M	Heterogeneous nuclear ribonucleoprotein M OS=Rattus norvegicus GN=Hnrnpm PE=1 SV=4
CL2770.Contig23_All	0.156	0.46	1.5661	1.27949e-09	1.28617e-09		K13291//terminal uridylyltransferase [EC:2.7.7.52];K13291//terminal uridylyltransferase [EC:2.7.7.52];K18060//poly(A) RNA polymerase, mitochondrial [EC:2.7.7.19];K18709//speckle targeted PIP5K1A-regulated poly(A) polymerase [EC:2.7.7.19 2.7.7.52];K18709//speckle targeted PIP5K1A-regulated poly(A) polymerase [EC:2.7.7.19 2.7.7.52]		uncharacterized protein LOC105687080 [Athalia rosae]	Cid1 family poly A polymerase
CL2770.Contig25_All	0	1.003	8.83782	1.11468e-44	4.09766e-45	Others	K12887//heterogeneous nuclear ribonucleoprotein M+ko03040//Spliceosome;K12887//heterogeneous nuclear ribonucleoprotein M+ko03040//Spliceosome;K12887//heterogeneous nuclear ribonucleoprotein M+ko03040//Spliceosome;K12887//heterogeneous nuclear ribonucleoprotein M+ko03040//Spliceosome;K12887//heterogeneous nuclear ribonucleoprotein M+ko03040//Spliceosome	XM_018464524.1 PREDICTED: Agrilus planipennis myelin expression factor 2 (LOC108733385), mRNA	PREDICTED: heterogeneous nuclear ribonucleoprotein M [Bemisia tabaci]	RNA recognition motif. (a.k.a. RRM, RBD, or RNP domain)	[A] KOG4212 RNA-binding protein hnRNP-M	Heterogeneous nuclear ribonucleoprotein M OS=Rattus norvegicus GN=Hnrnpm PE=1 SV=4
CL2770.Contig26_All	0	3.14	10.6235	3.98769e-117	6.27194e-118	Others	K12887//heterogeneous nuclear ribonucleoprotein M+ko03040//Spliceosome;K12887//heterogeneous nuclear ribonucleoprotein M+ko03040//Spliceosome;K12887//heterogeneous nuclear ribonucleoprotein M+ko03040//Spliceosome;K12887//heterogeneous nuclear ribonucleoprotein M+ko03040//Spliceosome;K12887//heterogeneous nuclear ribonucleoprotein M+ko03040//Spliceosome	XM_018464524.1 PREDICTED: Agrilus planipennis myelin expression factor 2 (LOC108733385), mRNA	PREDICTED: heterogeneous nuclear ribonucleoprotein M-like isoform X5 [Apis dorsata] >XP_006608854.1 PREDICTED: heterogeneous nuclear ribonucleoprotein M-like isoform X6 [Apis dorsata]	RNA recognition motif. (a.k.a. RRM, RBD, or RNP domain)	[A] KOG4212 RNA-binding protein hnRNP-M	Heterogeneous nuclear ribonucleoprotein M OS=Rattus norvegicus GN=Hnrnpm PE=1 SV=4
CL2770.Contig27_All	0	9.996	12.0845	1.03079e-249	7.63009e-251	Others	K12887//heterogeneous nuclear ribonucleoprotein M+ko03040//Spliceosome;K12887//heterogeneous nuclear ribonucleoprotein M+ko03040//Spliceosome;K12887//heterogeneous nuclear ribonucleoprotein M+ko03040//Spliceosome;K12887//heterogeneous nuclear ribonucleoprotein M+ko03040//Spliceosome;K12887//heterogeneous nuclear ribonucleoprotein M+ko03040//Spliceosome	XM_018464524.1 PREDICTED: Agrilus planipennis myelin expression factor 2 (LOC108733385), mRNA	PREDICTED: heterogeneous nuclear ribonucleoprotein M [Bemisia tabaci]	RNA recognition motif. (a.k.a. RRM, RBD, or RNP domain)	[A] KOG4212 RNA-binding protein hnRNP-M	Heterogeneous nuclear ribonucleoprotein M OS=Rattus norvegicus GN=Hnrnpm PE=1 SV=4
CL2770.Contig34_All	0	0.043	4.71082	0.000161729	0.000238164		K17732//mitochondrial-processing peptidase subunit beta [EC:3.4.24.64];K17732//mitochondrial-processing peptidase subunit beta [EC:3.4.24.64];K17732//mitochondrial-processing peptidase subunit beta [EC:3.4.24.64];K17732//mitochondrial-processing peptidase subunit beta [EC:3.4.24.64]		PREDICTED: mitochondrial-processing peptidase subunit beta [Trachymyrmex zeteki] >XP_018306250.1 PREDICTED: mitochondrial-processing peptidase subunit beta [Trachymyrmex zeteki]	Ubiquitin/SUMO-activating enzyme ubiquitin-like domain
CL2770.Contig36_All	0.68	2.226	1.71397	7.19562e-13	6.17494e-13					Diaphanous FH3 Domain
CL2770.Contig39_All	1.98	5.35	1.45266	6.70797e-71	1.66897e-71	Others	K12887//heterogeneous nuclear ribonucleoprotein M+ko03040//Spliceosome;K12887//heterogeneous nuclear ribonucleoprotein M+ko03040//Spliceosome;K12887//heterogeneous nuclear ribonucleoprotein M+ko03040//Spliceosome;K12887//heterogeneous nuclear ribonucleoprotein M+ko03040//Spliceosome;K12887//heterogeneous nuclear ribonucleoprotein M+ko03040//Spliceosome	XM_018464524.1 PREDICTED: Agrilus planipennis myelin expression factor 2 (LOC108733385), mRNA	PREDICTED: heterogeneous nuclear ribonucleoprotein M [Bemisia tabaci]	RNA recognition motif. (a.k.a. RRM, RBD, or RNP domain)	[A] KOG4212 RNA-binding protein hnRNP-M	Heterogeneous nuclear ribonucleoprotein M OS=Rattus norvegicus GN=Hnrnpm PE=1 SV=4
CL2770.Contig3_All	0.123	4.706	5.27017	2.04855e-174	2.15766e-175	Others	K12887//heterogeneous nuclear ribonucleoprotein M+ko03040//Spliceosome;K12887//heterogeneous nuclear ribonucleoprotein M+ko03040//Spliceosome;K12887//heterogeneous nuclear ribonucleoprotein M+ko03040//Spliceosome;K12887//heterogeneous nuclear ribonucleoprotein M+ko03040//Spliceosome;K12887//heterogeneous nuclear ribonucleoprotein M+ko03040//Spliceosome		PREDICTED: heterogeneous nuclear ribonucleoprotein M-like isoform X2 [Diaphorina citri]	Putative sensor	[A] KOG4212 RNA-binding protein hnRNP-M	Heterogeneous nuclear ribonucleoprotein M OS=Homo sapiens GN=HNRNPM PE=1 SV=3	GO:0003723//RNA binding;GO:0030529//intracellular ribonucleoprotein complex;GO:0019013//viral nucleocapsid
CL2770.Contig4_All	1.396	13.87	3.32091	0	0	Others	K12887//heterogeneous nuclear ribonucleoprotein M+ko03040//Spliceosome;K12887//heterogeneous nuclear ribonucleoprotein M+ko03040//Spliceosome;K12887//heterogeneous nuclear ribonucleoprotein M+ko03040//Spliceosome;K12887//heterogeneous nuclear ribonucleoprotein M+ko03040//Spliceosome;K12887//heterogeneous nuclear ribonucleoprotein M+ko03040//Spliceosome	XM_018464524.1 PREDICTED: Agrilus planipennis myelin expression factor 2 (LOC108733385), mRNA	PREDICTED: myelin expression factor 2 isoform X2 [Cimex lectularius]	RNA recognition motif. (a.k.a. RRM, RBD, or RNP domain)	[A] KOG4212 RNA-binding protein hnRNP-M	Heterogeneous nuclear ribonucleoprotein M OS=Rattus norvegicus GN=Hnrnpm PE=1 SV=4
CL2770.Contig6_All	0	0.543	8.59854	3.85913e-39	1.5705e-39	Others	K12887//heterogeneous nuclear ribonucleoprotein M+ko03040//Spliceosome;K12887//heterogeneous nuclear ribonucleoprotein M+ko03040//Spliceosome;K12887//heterogeneous nuclear ribonucleoprotein M+ko03040//Spliceosome;K12887//heterogeneous nuclear ribonucleoprotein M+ko03040//Spliceosome;K12887//heterogeneous nuclear ribonucleoprotein M+ko03040//Spliceosome	XM_018464524.1 PREDICTED: Agrilus planipennis myelin expression factor 2 (LOC108733385), mRNA	PREDICTED: heterogeneous nuclear ribonucleoprotein M [Bemisia tabaci]	RNA recognition motif. (a.k.a. RRM, RBD, or RNP domain)	[A] KOG4212 RNA-binding protein hnRNP-M	Heterogeneous nuclear ribonucleoprotein M OS=Rattus norvegicus GN=Hnrnpm PE=1 SV=4
CL2770.Contig8_All	0	0.43	7.64732	5.59583e-23	3.32162e-23	Others	K12887//heterogeneous nuclear ribonucleoprotein M+ko03040//Spliceosome;K12887//heterogeneous nuclear ribonucleoprotein M+ko03040//Spliceosome;K12887//heterogeneous nuclear ribonucleoprotein M+ko03040//Spliceosome;K12887//heterogeneous nuclear ribonucleoprotein M+ko03040//Spliceosome;K12887//heterogeneous nuclear ribonucleoprotein M+ko03040//Spliceosome	XM_018464524.1 PREDICTED: Agrilus planipennis myelin expression factor 2 (LOC108733385), mRNA	PREDICTED: heterogeneous nuclear ribonucleoprotein M [Bemisia tabaci]	RNA recognition motif. (a.k.a. RRM, RBD, or RNP domain)	[A] KOG4212 RNA-binding protein hnRNP-M	Heterogeneous nuclear ribonucleoprotein M OS=Rattus norvegicus GN=Hnrnpm PE=1 SV=4
CL2772.Contig2_All	0	10.3	12.6113	0	0		K05202//glutamate receptor, ionotropic kainate 2+ko04724//Glutamatergic synapse+ko04080//Neuroactive ligand-receptor interaction;K08214//MFS transporter, OCT family, solute carrier family 22 (organic cation transporter), member 18;K08214//MFS transporter, OCT family, solute carrier family 22 (organic cation transporter), member 18;K13506//glycerol-3-phosphate O-acyltransferase 3/4 [EC:2.3.1.15]+k…		major facilitator superfamily domain-containing protein 10-like [Nilaparvata lugens]	Major Facilitator Superfamily	[R] KOG2615 Permease of the major facilitator superfamily	Major facilitator superfamily domain-containing protein 10 OS=Homo sapiens GN=MFSD10 PE=1 SV=1	GO:0055085//transmembrane transport;GO:0016021//integral component of membrane
CL2774.Contig1_All	12.003	44.413	1.87727	0	0					Protein of unknown function (DUF2281)	[K] KOG2821 RNA polymerase II transcription elongation factor Elongin/SIII, subunit elongin A
CL2774.Contig3_All	4.65	16.456	1.8126	6.14929e-290	3.90347e-291					Protein of unknown function (DUF2281)
CL2776.Contig2_All	0	1.48	6.4973	5.53561e-12	4.94414e-12
CL279.Contig4_All	1.63	5.133	1.65793	2.79687e-74	6.68208e-75		K14073//pancreatic triacylglycerol lipase [EC:3.1.1.3]+ko04975//Fat digestion and absorption+ko04977//Vitamin digestion and absorption+ko04972//Pancreatic secretion+ko00561//Glycerolipid metabolism+ko01100//Metabolic pathways;K14073//pancreatic triacylglycerol lipase [EC:3.1.1.3]+ko04975//Fat digestion and absorption+ko04977//Vitamin digestion and absorption+ko04972//Pancreatic secretion+ko00561/…		PREDICTED: pancreatic triacylglycerol lipase [Harpegnathos saltator]	Lipase	[MOI] TWOG0490 Vitellogenin/Lipoprotein lipase/Triacylglyerol lipase	Inactive pancreatic lipase-related protein 1 OS=Mus musculus GN=Pnliprp1 PE=1 SV=2
CL2790.Contig1_All	0	1.023	5.11683	1.38777e-05	1.84966e-05		K08770//ubiquitin C+ko03320//PPAR signaling pathway;K08770//ubiquitin C+ko03320//PPAR signaling pathway;K08770//ubiquitin C+ko03320//PPAR signaling pathway;K08770//ubiquitin C+ko03320//PPAR signaling pathway;K04551//ubiquitin B+ko04144//Endocytosis+ko04137//Mitophagy - animal+ko05012//Parkinson disease+ko05167//Kaposi sarcoma-associated herpesvirus infection	NM_001077804.2 Danio rerio ubiquitin C (ubc), mRNA	PREDICTED: polyubiquitin-B isoform X1 [Pseudopodoces humilis]		[OR] KOG0001 Ubiquitin and ubiquitin-like proteins	Polyubiquitin-B OS=Rattus norvegicus GN=Ubb PE=1 SV=1
CL2790.Contig2_All	0	1.216	5.1993	7.76576e-06	1.01504e-05		K08770//ubiquitin C+ko03320//PPAR signaling pathway;K08770//ubiquitin C+ko03320//PPAR signaling pathway;K08770//ubiquitin C+ko03320//PPAR signaling pathway;K04551//ubiquitin B+ko04144//Endocytosis+ko04137//Mitophagy - animal+ko05012//Parkinson disease+ko05167//Kaposi sarcoma-associated herpesvirus infection	NM_001013272.2 Danio rerio ubiquitin B (ubb), mRNA >BC069831.1 Danio rerio zgc:172187, mRNA (cDNA clone IMAGE:4790152), partial cds	putative ubiquitin C variant 4 [Taeniopygia guttata]		[OR] KOG0001 Ubiquitin and ubiquitin-like proteins	Polyubiquitin-B OS=Rattus norvegicus GN=Ubb PE=1 SV=1
CL28.Contig2_All	0	0.303	5.5359	5.29216e-07	6.29365e-07					Leucine zipper of domain CC2 of NEMO, NF-kappa-B essential modulator
CL280.Contig1_All	0.423	1.213	1.49813	8.90722e-27	4.78473e-27		K20478//golgin subfamily B member 1;K20478//golgin subfamily B member 1;K20478//golgin subfamily B member 1;K20478//golgin subfamily B member 1;K20478//golgin subfamily B member 1		macoilin-1 isoform X2 [Zootermopsis nevadensis]	Transmembrane protein	[S] KOG1821 Uncharacterized conserved protein	Macoilin OS=Bos taurus GN=TMEM57 PE=2 SV=1	GO:0016021//integral component of membrane
CL280.Contig3_All	1.303	5.236	2.00334	3.52422e-178	3.65446e-179		K20478//golgin subfamily B member 1;K20478//golgin subfamily B member 1;K20478//golgin subfamily B member 1;K20478//golgin subfamily B member 1;K20478//golgin subfamily B member 1		macoilin-1 isoform X2 [Zootermopsis nevadensis]	Transmembrane protein	[S] KOG1821 Uncharacterized conserved protein	Macoilin OS=Bos taurus GN=TMEM57 PE=2 SV=1	GO:0016021//integral component of membrane
CL2801.Contig1_All	0.026	1.353	5.60206	3.36011e-25	1.8813e-25	Homeobox		LN214218.1 Spirometra erinaceieuropaei genome assembly S_erinaceieuropaei ,scaffold SPER_contig0035537	conserved Plasmodium protein, unknown function [Plasmodium ovale]	Myc amino-terminal region
CL2804.Contig4_All	1.643	5.146	1.65702	3.93744e-26	2.14847e-26		K15712//E3 ubiquitin-protein ligase TTC3 [EC:2.3.2.27];K15712//E3 ubiquitin-protein ligase TTC3 [EC:2.3.2.27];K15712//E3 ubiquitin-protein ligase TTC3 [EC:2.3.2.27];K15712//E3 ubiquitin-protein ligase TTC3 [EC:2.3.2.27];K15712//E3 ubiquitin-protein ligase TTC3 [EC:2.3.2.27]		PREDICTED: E3 ubiquitin-protein ligase TTC3 [Chlamydotis macqueenii]		[O] LSE0218 H Predicted E3 ubiquitin ligase	E3 ubiquitin-protein ligase TTC3 OS=Homo sapiens GN=TTC3 PE=1 SV=2
CL2805.Contig2_All	5.46	13.46	1.30124	2.06597e-143	2.69474e-144
CL2806.Contig1_All	2.503	17.036	2.77592	0	0		K04437//filamin+ko05132//Salmonella infection+ko04510//Focal adhesion+ko05205//Proteoglycans in cancer+ko04010//MAPK signaling pathway;K04437//filamin+ko05132//Salmonella infection+ko04510//Focal adhesion+ko05205//Proteoglycans in cancer+ko04010//MAPK signaling pathway;K04437//filamin+ko05132//Salmonella infection+ko04510//Focal adhesion+ko05205//Proteoglycans in cancer+ko04010//MAPK signaling pa…		PREDICTED: filamin-A [Bemisia tabaci]	Filamin/ABP280 repeat	[Z] KOG0518 Actin-binding cytoskeleton protein, filamin	Filamin-C OS=Rattus norvegicus GN=Flnc PE=1 SV=1
CL281.Contig3_All	2.566	7.833	1.61459	5.96339e-73	1.44612e-73	TF_bZIP	K10523//speckle-type POZ protein+ko04341//Hedgehog signaling pathway - fly+ko04340//Hedgehog signaling pathway;K10523//speckle-type POZ protein+ko04341//Hedgehog signaling pathway - fly+ko04340//Hedgehog signaling pathway;K10523//speckle-type POZ protein+ko04341//Hedgehog signaling pathway - fly+ko04340//Hedgehog signaling pathway		PREDICTED: protein roadkill [Rhagoletis zephyria]	BTB/POZ domain	[DR] KOG1987 Speckle-type POZ protein SPOP and related proteins with TRAF, MATH and BTB/POZ domains	Speckle-type POZ protein A OS=Xenopus laevis GN=spop-a PE=2 SV=1	GO:0005634//nucleus;GO:0043161//proteasome-mediated ubiquitin-dependent protein catabolic process;GO:0030162//regulation of proteolysis;GO:0031625//ubiquitin protein ligase binding;GO:0042787//protein ubiquitination involved in ubiquitin-dependent protein catabolic process;GO:0005737//cytoplasm;GO:0019005//SCF ubiquitin ligase complex
CL281.Contig4_All	0.056	0.266	2.2624	5.76397e-06	7.44179e-06	ZBTB	K10523//speckle-type POZ protein+ko04341//Hedgehog signaling pathway - fly+ko04340//Hedgehog signaling pathway;K10523//speckle-type POZ protein+ko04341//Hedgehog signaling pathway - fly+ko04340//Hedgehog signaling pathway;K10523//speckle-type POZ protein+ko04341//Hedgehog signaling pathway - fly+ko04340//Hedgehog signaling pathway		PREDICTED: protein roadkill [Rhagoletis zephyria]	BTB/POZ domain	[DR] KOG1987 Speckle-type POZ protein SPOP and related proteins with TRAF, MATH and BTB/POZ domains	Speckle-type POZ protein A OS=Xenopus laevis GN=spop-a PE=2 SV=1
CL2810.Contig1_All	3.506	7.92	1.17128	6.28341e-69	1.60364e-69		K17759//NAD(P)H-hydrate epimerase [EC:5.1.99.6];K17759//NAD(P)H-hydrate epimerase [EC:5.1.99.6];K17759//NAD(P)H-hydrate epimerase [EC:5.1.99.6];K17759//NAD(P)H-hydrate epimerase [EC:5.1.99.6]		NAD(P)H-hydrate epimerase [Nilaparvata lugens]	SAC3/GANP family	[S] KOG2585 Uncharacterized conserved protein	NAD(P)H-hydrate epimerase OS=Drosophila willistoni GN=GK25285 PE=3 SV=2	GO:0046872//metal ion binding;GO:0000166//nucleotide binding;GO:0052856//NADHX epimerase activity
CL2811.Contig2_All	2.09	4.676	1.15435	6.02813e-78	1.38844e-78	THAP			DNA transposase THAP9 [Boleophthalmus pectinirostris]	THAP domain		THAP domain-containing protein 1 OS=Homo sapiens GN=THAP1 PE=1 SV=1
CL282.Contig1_All	0	0.166	6.09287	1.5363e-09	1.55233e-09		K20641//Rho GTPase-activating protein 20;K20641//Rho GTPase-activating protein 20;K20641//Rho GTPase-activating protein 20	BX511310.13 Zebrafish DNA sequence from clone DKEY-274M14 in linkage group 21, complete sequence	rho GTPase-activating protein 20-like isoform X2 [Myzus persicae]
CL2834.Contig2_All	0.223	0.753	1.72476	7.62904e-11	7.18541e-11				uncharacterized protein LOC111055568 [Nilaparvata lugens]	PH domain
CL2852.Contig1_All	350.956	713.026	1.02395	0	0					Apolipophorin-III precursor (apoLp-III)
CL2861.Contig1_All	2.29	5.75	1.32642	2.40415e-113	3.8989e-114		K11673//actin-related protein 8;K11673//actin-related protein 8;K11673//actin-related protein 8;K11673//actin-related protein 8;K11673//actin-related protein 8		actin-related protein 8 isoform X4 [Zootermopsis nevadensis] >KDR14149.1 Actin-related protein 8 [Zootermopsis nevadensis]	Actin	[Z] KOG0797 Actin-related protein	Actin-related protein 8 OS=Aedes aegypti GN=Arp8 PE=3 SV=1
CL2871.Contig1_All	0.156	16.003	6.68122	0	0		K04373//ribosomal protein S6 kinase alpha-1/2/3/6 [EC:2.7.11.1]+ko04914//Progesterone-mediated oocyte maturation+ko04720//Long-term potentiation+ko04722//Neurotrophin signaling pathway+ko04714//Thermogenesis+ko04931//Insulin resistance+ko04150//mTOR signaling pathway+ko04010//MAPK signaling pathway+ko04114//Oocyte meiosis;K04373//ribosomal protein S6 kinase alpha-1/2/3/6 [EC:2.7.11.1]+ko04914//Pr…	LM415792.1 Enterobius vermicularis genome assembly E_vermicularis_Canary_Islands ,scaffold EVEC_scaffold0002234	PREDICTED: ribosomal protein S6 kinase alpha-2 isoform X1 [Bemisia tabaci]	Protein kinase domain	[T] KOG0603 Ribosomal protein S6 kinase	Ribosomal protein S6 kinase alpha-1 OS=Rattus norvegicus GN=Rps6ka1 PE=1 SV=1
CL2873.Contig2_All	0.003	0.446	7.0613	9.41525e-39	3.86713e-39		K11791//DDB1- and CUL4-associated factor 15;K11791//DDB1- and CUL4-associated factor 15;K11791//DDB1- and CUL4-associated factor 15;K11791//DDB1- and CUL4-associated factor 15;K11791//DDB1- and CUL4-associated factor 15		PREDICTED: uncharacterized protein LOC109034107 [Bemisia tabaci]	DDB1-and CUL4-substrate receptor 15, WD repeat		DDB1- and CUL4-associated factor 15 OS=Bos taurus GN=DCAF15 PE=2 SV=1
CL2881.Contig2_All	0.643	1.416	1.13904	3.24154e-05	4.45572e-05				odorant-binding protein [Phenacoccus solenopsis]	PBP/GOBP family
CL2882.Contig3_All	0	0.673	7.88337	3.00789e-26	1.63636e-26		K13356//alcohol-forming fatty acyl-CoA reductase [EC:1.2.1.84]+ko04146//Peroxisome+ko04212//Longevity regulating pathway - worm+ko00073//Cutin, suberine and wax biosynthesis		fatty acyl-CoA reductase [Ericerus pela]	Male sterility protein	[I] KOG1221 Acyl-CoA reductase	Fatty acyl-CoA reductase 1 OS=Xenopus laevis GN=far1 PE=2 SV=1	GO:0080019//fatty-acyl-CoA reductase (alcohol-forming) activity;GO:0016021//integral component of membrane;GO:0102965//alcohol-forming fatty acyl-CoA reductase activity;GO:0006629//lipid metabolic process
CL2883.Contig1_All	0.53	1.06	1.02204	3.78119e-07	4.45318e-07			LK064619.1 Apteryx australis mantelli genome assembly AptMant0, scaffold scaffold41
CL289.Contig1_All	0.613	38.03	5.93781	0	0		K00228//coproporphyrinogen III oxidase [EC:1.3.3.3]+ko00860//Porphyrin and chlorophyll metabolism+ko01100//Metabolic pathways;K00228//coproporphyrinogen III oxidase [EC:1.3.3.3]+ko00860//Porphyrin and chlorophyll metabolism+ko01100//Metabolic pathways;K00228//coproporphyrinogen III oxidase [EC:1.3.3.3]+ko00860//Porphyrin and chlorophyll metabolism+ko01100//Metabolic pathways;K00228//coproporphyri…		PREDICTED: oxygen-dependent coproporphyrinogen-III oxidase [Polistes canadensis]	Coproporphyrinogen III oxidase	[H] KOG1518 Coproporphyrinogen III oxidase CPO/HEM13	Oxygen-dependent coproporphyrinogen-III oxidase OS=Drosophila melanogaster GN=Coprox PE=2 SV=1	GO:0004109//coproporphyrinogen oxidase activity;GO:0006779//porphyrin-containing compound biosynthetic process
CL289.Contig2_All	0.133	5.05	5.22053	5.08351e-208	4.4757e-209	zf-C2H2	K09228//KRAB domain-containing zinc finger protein;K09228//KRAB domain-containing zinc finger protein;K09228//KRAB domain-containing zinc finger protein;K09228//KRAB domain-containing zinc finger protein;K09228//KRAB domain-containing zinc finger protein		PREDICTED: LOW QUALITY PROTEIN: uncharacterized protein LOC106873060, partial [Octopus bimaculoides]	Zinc finger, C2H2 type	[R] KOG1721 FOG: Zn-finger	Zinc finger protein 484 OS=Homo sapiens GN=ZNF484 PE=1 SV=1	GO:0003676//nucleic acid binding
CL2890.Contig1_All	1.716	4.793	1.49099	1.01615e-58	2.94794e-59		K01227//mannosyl-glycoprotein endo-beta-N-acetylglucosaminidase [EC:3.2.1.96]+ko00511//Other glycan degradation;K01227//mannosyl-glycoprotein endo-beta-N-acetylglucosaminidase [EC:3.2.1.96]+ko00511//Other glycan degradation;K01227//mannosyl-glycoprotein endo-beta-N-acetylglucosaminidase [EC:3.2.1.96]+ko00511//Other glycan degradation;K01227//mannosyl-glycoprotein endo-beta-N-acetylglucosaminidase…		PREDICTED: cytosolic endo-beta-N-acetylglucosaminidase [Diuraphis noxia]	Glycosyl hydrolase family 85	[R] KOG2331 Predicted glycosylhydrolase	Cytosolic endo-beta-N-acetylglucosaminidase OS=Homo sapiens GN=ENGASE PE=1 SV=1	GO:0033925//mannosyl-glycoprotein endo-beta-N-acetylglucosaminidase activity;GO:0005737//cytoplasm
CL2890.Contig2_All	0	1.523	9.02661	1.43196e-49	4.82974e-50		K01227//mannosyl-glycoprotein endo-beta-N-acetylglucosaminidase [EC:3.2.1.96]+ko00511//Other glycan degradation;K01227//mannosyl-glycoprotein endo-beta-N-acetylglucosaminidase [EC:3.2.1.96]+ko00511//Other glycan degradation;K01227//mannosyl-glycoprotein endo-beta-N-acetylglucosaminidase [EC:3.2.1.96]+ko00511//Other glycan degradation;K01227//mannosyl-glycoprotein endo-beta-N-acetylglucosaminidase…		PREDICTED: cytosolic endo-beta-N-acetylglucosaminidase [Bemisia tabaci] >XP_018911537.1 PREDICTED: cytosolic endo-beta-N-acetylglucosaminidase [Bemisia tabaci]	Glycosyl hydrolase family 85	[R] KOG2331 Predicted glycosylhydrolase	Cytosolic endo-beta-N-acetylglucosaminidase OS=Gallus gallus GN=ENGASE PE=1 SV=1	GO:0033925//mannosyl-glycoprotein endo-beta-N-acetylglucosaminidase activity;GO:0005737//cytoplasm
CL2903.Contig2_All	4.516	9.063	1.00753	2.83664e-32	1.33415e-32					LRRFIP family
CL2905.Contig1_All	2.103	4.636	1.14511	3.51665e-59	1.01486e-59					Spindle and kinetochore-associated protein 2
CL2908.Contig1_All	0.58	1.223	1.07201	2.76575e-06	3.47883e-06		K00471//gamma-butyrobetaine dioxygenase [EC:1.14.11.1]+ko00310//Lysine degradation;K00471//gamma-butyrobetaine dioxygenase [EC:1.14.11.1]+ko00310//Lysine degradation;K00471//gamma-butyrobetaine dioxygenase [EC:1.14.11.1]+ko00310//Lysine degradation;K00471//gamma-butyrobetaine dioxygenase [EC:1.14.11.1]+ko00310//Lysine degradation		gamma-butyrobetaine dioxygenase-like [Myzus persicae]	Taurine catabolism dioxygenase TauD, TfdA family	[I] KOG3888 Gamma-butyrobetaine,2-oxoglutarate dioxygenase	Gamma-butyrobetaine dioxygenase OS=Mus musculus GN=Bbox1 PE=1 SV=1	GO:0051213//dioxygenase activity
CL2909.Contig2_All	4.636	11.066	1.24895	2.30597e-65	6.16596e-66					Zinc finger, C2H2 type
CL2918.Contig1_All	0	2.003	9.07617	6.13922e-51	2.02928e-51
CL2925.Contig2_All	0.35	1.11	1.64221	1.10631e-26	5.95846e-27		K21766//tubulin-specific chaperone C;K21766//tubulin-specific chaperone C;K21766//tubulin-specific chaperone C;K21766//tubulin-specific chaperone C;K21766//tubulin-specific chaperone C		tubulin-specific chaperone C [Zootermopsis nevadensis] >XP_021923266.1 tubulin-specific chaperone C [Zootermopsis nevadensis] >KDR17688.1 Tubulin-specific chaperone C [Zootermopsis nevadensis]	Tubulin binding cofactor C	[S] KOG1045 Uncharacterized conserved protein HEN1/CORYMBOSA2	Small RNA 2'-O-methyltransferase OS=Drosophila melanogaster GN=Hen1 PE=1 SV=1	GO:0015631//tubulin binding;GO:0007023//post-chaperonin tubulin folding pathway
CL2934.Contig1_All	0.266	13.51	5.67377	0	0					Protein of unknown function (DUF2533)
CL2940.Contig1_All	0.066	0.413	2.67125	4.29817e-24	2.47893e-24	Homeobox	K03254//translation initiation factor 3 subunit A+ko03013//RNA transport;K03254//translation initiation factor 3 subunit A+ko03013//RNA transport;K03254//translation initiation factor 3 subunit A+ko03013//RNA transport;K03254//translation initiation factor 3 subunit A+ko03013//RNA transport;K03254//translation initiation factor 3 subunit A+ko03013//RNA transport	XM_021340458.1 PREDICTED: Helicoverpa armigera eukaryotic translation initiation factor 3 subunit A-like (LOC110380457), mRNA	PREDICTED: eukaryotic translation initiation factor 3 subunit A [Tribolium castaneum] >EFA10123.1 Eukaryotic translation initiation factor 3 subunit A-like Protein [Tribolium castaneum]	PCI domain	[J] KOG2072 Translation initiation factor 3, subunit a (eIF-3a)	Eukaryotic translation initiation factor 3 subunit A OS=Drosophila mojavensis GN=eIF3a PE=3 SV=1	GO:0016282//eukaryotic 43S preinitiation complex;GO:0006446//regulation of translational initiation;GO:0003743//translation initiation factor activity;GO:0033290//eukaryotic 48S preinitiation complex;GO:0005852//eukaryotic translation initiation factor 3 complex;GO:0001731//formation of translation preinitiation complex
CL2944.Contig1_All	0.123	1.213	3.2832	1.15675e-17	8.20542e-18			LT608278.1 Plasmodium berghei strain SP11 RLL genome assembly, chromosome: 14	hypothetical protein TcasGA2_TC005263 [Tribolium castaneum]
CL2944.Contig2_All	0.753	3.976	2.41258	1.52922e-30	7.4832e-31			LT608278.1 Plasmodium berghei strain SP11 RLL genome assembly, chromosome: 14	hypothetical protein TcasGA2_TC008591 [Tribolium castaneum]
CL2957.Contig1_All	0.243	1.966	3.02937	9.59792e-10	9.54889e-10
CL2961.Contig3_All	0.04	5.213	7.05531	8.36291e-124	1.24535e-124					Peptidase C13 family
CL2966.Contig2_All	1.183	3.343	1.49604	8.2186e-114	1.33106e-114	zf-C2H2	K09494//T-complex protein 1 subunit beta;K09494//T-complex protein 1 subunit beta;K09494//T-complex protein 1 subunit beta;K09494//T-complex protein 1 subunit beta;K09494//T-complex protein 1 subunit beta	XM_003701712.2 PREDICTED: Megachile rotundata T-complex protein 1 subunit beta (LOC100878217), transcript variant X2, mRNA	T-complex protein 1 subunit beta [Nilaparvata lugens]	TCP-1/cpn60 chaperonin family	[O] KOG0363 Chaperonin complex component, TCP-1 beta subunit (CCT2)	T-complex protein 1 subunit beta OS=Bos taurus GN=CCT2 PE=1 SV=3	GO:0006457//protein folding;GO:0005524//ATP binding;GO:0051082//unfolded protein binding;GO:0005737//cytoplasm
CL2968.Contig1_All	1.216	9.38	2.96251	1.35914e-250	1.00311e-251		K01613//phosphatidylserine decarboxylase [EC:4.1.1.65]+ko00564//Glycerophospholipid metabolism+ko01100//Metabolic pathways;K01613//phosphatidylserine decarboxylase [EC:4.1.1.65]+ko00564//Glycerophospholipid metabolism+ko01100//Metabolic pathways;K01613//phosphatidylserine decarboxylase [EC:4.1.1.65]+ko00564//Glycerophospholipid metabolism+ko01100//Metabolic pathways;K01613//phosphatidylserine dec…	KC223166.1 Nilaparvata lugens putative phosphatidylserine decarboxylase proenzyme-like protein mRNA, partial cds	PREDICTED: phosphatidylserine decarboxylase proenzyme, mitochondrial isoform X2 [Bemisia tabaci]	Phosphatidylserine decarboxylase	[I] KOG2420 Phosphatidylserine decarboxylase	Phosphatidylserine decarboxylase proenzyme, mitochondrial OS=Mus musculus GN=Pisd PE=2 SV=1
CL297.Contig7_All	0.27	0.923	1.78952	4.88008e-87	1.01474e-87	zf-C2H2	K09228//KRAB domain-containing zinc finger protein;K13171//serine/arginine repetitive matrix protein 1+ko03013//RNA transport+ko03015//mRNA surveillance pathway;K13170//splicing factor, arginine/serine-rich 18;K13171//serine/arginine repetitive matrix protein 1+ko03013//RNA transport+ko03015//mRNA surveillance pathway		PREDICTED: uncharacterized protein LOC106640107 isoform X2 [Copidosoma floridanum]	Zinc finger, C2H2 type	[A] KOG1869 Splicing coactivator SRm160/300, subunit SRm300	Dentin sialophosphoprotein OS=Mus musculus GN=Dspp PE=1 SV=2
CL297.Contig8_All	0	0.033	6.06983	2.03375e-09	2.07265e-09	zf-C2H2	K13171//serine/arginine repetitive matrix protein 1+ko03013//RNA transport+ko03015//mRNA surveillance pathway;K13170//splicing factor, arginine/serine-rich 18;K13171//serine/arginine repetitive matrix protein 1+ko03013//RNA transport+ko03015//mRNA surveillance pathway;K13171//serine/arginine repetitive matrix protein 1+ko03013//RNA transport+ko03015//mRNA surveillance pathway;K13170//splicing fac…		PREDICTED: uncharacterized protein LOC108564796 isoform X1 [Nicrophorus vespilloides]	Zinc finger, C2H2 type	[A] KOG1869 Splicing coactivator SRm160/300, subunit SRm300	Dentin sialophosphoprotein OS=Mus musculus GN=Dspp PE=1 SV=2
CL2974.Contig1_All	1.61	3.426	1.07325	1.66669e-28	8.54724e-29		K10627//E3 ubiquitin-protein ligase RAD18 [EC:2.3.2.27];K10627//E3 ubiquitin-protein ligase RAD18 [EC:2.3.2.27];K10627//E3 ubiquitin-protein ligase RAD18 [EC:2.3.2.27];K10627//E3 ubiquitin-protein ligase RAD18 [EC:2.3.2.27];K10627//E3 ubiquitin-protein ligase RAD18 [EC:2.3.2.27]		PREDICTED: E3 ubiquitin-protein ligase RAD18-like [Wasmannia auropunctata]	Zinc finger, C3HC4 type (RING finger)	[T] KOG0297 TNF receptor-associated factor	E3 ubiquitin-protein ligase RNF8 OS=Bos taurus GN=RNF8 PE=2 SV=1
CL2979.Contig2_All	1.063	4.263	2.00362	6.22829e-38	2.59219e-38
CL2984.Contig1_All	1.486	3.51	1.2411	1.5142e-16	1.12265e-16		K10443//kelch-like protein 2/3		uncharacterized protein LOC111026644 [Myzus persicae]				GO:0003964//RNA-directed DNA polymerase activity;GO:0004523//RNA-DNA hybrid ribonuclease activity;GO:0003676//nucleic acid binding
CL2986.Contig1_All	0.13	0.693	2.46794	1.60906e-07	1.8471e-07
CL2992.Contig2_All	1.206	2.536	1.07502	4.11944e-19	2.77749e-19		K09598//signal peptide peptidase-like 3 [EC:3.4.23.-];K09598//signal peptide peptidase-like 3 [EC:3.4.23.-];K09598//signal peptide peptidase-like 3 [EC:3.4.23.-];K09598//signal peptide peptidase-like 3 [EC:3.4.23.-];K09598//signal peptide peptidase-like 3 [EC:3.4.23.-]	XM_018497797.1 PREDICTED: Trachymyrmex septentrionalis signal peptide peptidase-like 3 (LOC108755054), transcript variant X2, mRNA	signal peptide peptidase-like 3 isoform X1 [Nilaparvata lugens]	Signal peptide peptidase	[S] KOG2443 Uncharacterized conserved protein	Signal peptide peptidase-like 3 OS=Mus musculus GN=Sppl3 PE=1 SV=3	GO:0016021//integral component of membrane;GO:0004190//aspartic-type endopeptidase activity
CL2995.Contig2_All	0.33	0.923	1.49651	5.90695e-07	7.04982e-07		K06254//agrin+ko04512//ECM-receptor interaction;K06254//agrin+ko04512//ECM-receptor interaction;K10809//thyroglobulin+ko04918//Thyroid hormone synthesis+ko05320//Autoimmune thyroid disease;K10809//thyroglobulin+ko04918//Thyroid hormone synthesis+ko05320//Autoimmune thyroid disease;K06254//agrin+ko04512//ECM-receptor interaction		PREDICTED: SPARC-related modular calcium-binding protein 2 isoform X1 [Diuraphis noxia]	Thyroglobulin type-1 repeat	[MW] KOG1214 Nidogen and related basement membrane protein proteins	SPARC-related modular calcium-binding protein 2 OS=Mus musculus GN=Smoc2 PE=1 SV=1	GO:0007165//signal transduction;GO:0005509//calcium ion binding;GO:0005578//proteinaceous extracellular matrix
CL302.Contig2_All	2.26	4.606	1.02167	2.41811e-50	8.05335e-51		K10484//structure-specific endonuclease subunit SLX4 (BTB/POZ domain-containing protein 12)+ko03460//Fanconi anemia pathway;K10484//structure-specific endonuclease subunit SLX4 (BTB/POZ domain-containing protein 12)+ko03460//Fanconi anemia pathway;K10484//structure-specific endonuclease subunit SLX4 (BTB/POZ domain-containing protein 12)+ko03460//Fanconi anemia pathway;K10484//structure-specific …		structure-specific endonuclease subunit SLX4-like isoform X1 [Zootermopsis nevadensis]	Slx4 endonuclease		Structure-specific endonuclease subunit SLX4 OS=Mus musculus GN=Slx4 PE=1 SV=1
CL3020.Contig6_All	0	0.336	5.85108	2.46239e-08	2.67892e-08
CL3021.Contig1_All	3.163	19.623	2.61565	0	0		K02728//20S proteasome subunit alpha 3 [EC:3.4.25.1]+ko03050//Proteasome;K02728//20S proteasome subunit alpha 3 [EC:3.4.25.1]+ko03050//Proteasome;K02728//20S proteasome subunit alpha 3 [EC:3.4.25.1]+ko03050//Proteasome		PREDICTED: protein snwA [Musca domestica]	U11-48K-like CHHC zinc finger	[S] KOG4376 Uncharacterized conserved protein	Gametocyte-specific factor 1 OS=Mus musculus GN=Gtsf1 PE=1 SV=1
CL3024.Contig1_All	0.066	0.306	2.2132	0.000601625	0.000942983		K17439//large subunit ribosomal protein L35;K17439//large subunit ribosomal protein L35;K17439//large subunit ribosomal protein L35;K17439//large subunit ribosomal protein L35		protein D3-like isoform X2 [Myzus persicae]	Phosphatidylethanolamine-binding protein	[R] KOG3346 Phosphatidylethanolamine binding protein	Protein D1 (Fragment) OS=Onchocerca volvulus GN=D1 PE=2 SV=1
CL3029.Contig1_All	0.05	21.95	8.79168	0	0		K10955//mucin-2+ko05226//Gastric cancer+ko05146//Amoebiasis;K10955//mucin-2+ko05226//Gastric cancer+ko05146//Amoebiasis		PREDICTED: uncharacterized protein DDB_G0271670-like [Pseudopodoces humilis]	Predicted AAA-ATPase
CL303.Contig10_All	0.056	0.233	2.05281	3.44347e-24	1.97887e-24	RHD	K10380//ankyrin+ko04624//Toll and Imd signaling pathway+ko05205//Proteoglycans in cancer;K10380//ankyrin+ko04624//Toll and Imd signaling pathway+ko05205//Proteoglycans in cancer;K10380//ankyrin+ko04624//Toll and Imd signaling pathway+ko05205//Proteoglycans in cancer;K10380//ankyrin+ko04624//Toll and Imd signaling pathway+ko05205//Proteoglycans in cancer	XM_015322598.1 PREDICTED: Polistes dominula ankyrin-3-like (LOC107067261), transcript variant X4, mRNA	PREDICTED: ankyrin-2-like isoform X23 [Cimex lectularius]	Ankyrin repeats (3 copies)	[M] KOG4177 Ankyrin	Ankyrin-3 OS=Homo sapiens GN=ANK3 PE=1 SV=3
CL303.Contig4_All	0	0.443	9.63796	3.54711e-69	9.03358e-70	RHD	K10380//ankyrin+ko04624//Toll and Imd signaling pathway+ko05205//Proteoglycans in cancer;K10380//ankyrin+ko04624//Toll and Imd signaling pathway+ko05205//Proteoglycans in cancer;K10380//ankyrin+ko04624//Toll and Imd signaling pathway+ko05205//Proteoglycans in cancer;K10380//ankyrin+ko04624//Toll and Imd signaling pathway+ko05205//Proteoglycans in cancer	XM_015322598.1 PREDICTED: Polistes dominula ankyrin-3-like (LOC107067261), transcript variant X4, mRNA	PREDICTED: ankyrin-2-like isoform X23 [Cimex lectularius]	Ankyrin repeats (3 copies)	[M] KOG4177 Ankyrin	Ankyrin-3 OS=Homo sapiens GN=ANK3 PE=1 SV=3
CL303.Contig8_All	1.213	4.473	1.87638	0	0	RHD	K10380//ankyrin+ko04624//Toll and Imd signaling pathway+ko05205//Proteoglycans in cancer;K10380//ankyrin+ko04624//Toll and Imd signaling pathway+ko05205//Proteoglycans in cancer;K10380//ankyrin+ko04624//Toll and Imd signaling pathway+ko05205//Proteoglycans in cancer;K10380//ankyrin+ko04624//Toll and Imd signaling pathway+ko05205//Proteoglycans in cancer	XM_015322598.1 PREDICTED: Polistes dominula ankyrin-3-like (LOC107067261), transcript variant X4, mRNA	PREDICTED: ankyrin-2-like isoform X23 [Cimex lectularius]	Ankyrin repeats (3 copies)	[M] KOG4177 Ankyrin	Ankyrin-3 OS=Homo sapiens GN=ANK3 PE=1 SV=3
CL3033.Contig2_All	0.846	2.84	1.73439	6.25831e-48	2.16932e-48				hypothetical protein TRFO_13846 [Tritrichomonas foetus]
CL3042.Contig1_All	0.063	0.37	2.54266	1.71997e-07	1.97834e-07		K12839//survival of motor neuron-related-splicing factor 30+ko03040//Spliceosome;K12839//survival of motor neuron-related-splicing factor 30+ko03040//Spliceosome;K12839//survival of motor neuron-related-splicing factor 30+ko03040//Spliceosome;K12839//survival of motor neuron-related-splicing factor 30+ko03040//Spliceosome		survival motor neuron protein [Riptortus pedestris]	Survival motor neuron protein (SMN)	[A] KOG3026 Splicing factor SPF30	Survival of motor neuron-related-splicing factor 30 OS=Danio rerio GN=smndc1 PE=2 SV=1
CL3049.Contig3_All	0	12.273	12.8923	0	0		K15436//transportin-3;K15436//transportin-3;K15436//transportin-3;K15436//transportin-3;K15436//transportin-3		transportin-3 isoform X1 [Zootermopsis nevadensis] >KDR17047.1 Transportin-3 [Zootermopsis nevadensis]	Exportin 1-like protein	[U] KOG2081 Nuclear transport regulator	Transportin-3 OS=Mus musculus GN=Tnpo3 PE=1 SV=1
CL305.Contig14_All	0	1.95	9.65731	6.63908e-70	1.67565e-70	zf-NF-X1	K13100//pre-mRNA-splicing factor CWC22;K13171//serine/arginine repetitive matrix protein 1+ko03013//RNA transport+ko03015//mRNA surveillance pathway;K12893//splicing factor, arginine/serine-rich 4/5/6+ko03040//Spliceosome+ko05168//Herpes simplex infection;K13171//serine/arginine repetitive matrix protein 1+ko03013//RNA transport+ko03015//mRNA surveillance pathway;K12893//splicing factor, arginine…		PREDICTED: serine/arginine repetitive matrix protein 1 [Ceratosolen solmsi marchali]	Domain of unknown function (DUF4746)	[A] KOG4676 Splicing factor, arginine/serine-rich	Probable splicing factor, arginine/serine-rich 7 OS=Caenorhabditis elegans GN=rsp-7 PE=3 SV=3	GO:0003700//DNA binding transcription factor activity
CL305.Contig17_All	0.453	1.463	1.68478	7.70879e-15	6.10838e-15		K17498//transcription factor SPN1;K13171//serine/arginine repetitive matrix protein 1+ko03013//RNA transport+ko03015//mRNA surveillance pathway;K13171//serine/arginine repetitive matrix protein 1+ko03013//RNA transport+ko03015//mRNA surveillance pathway;K13171//serine/arginine repetitive matrix protein 1+ko03013//RNA transport+ko03015//mRNA surveillance pathway;K13171//serine/arginine repetitive …		PREDICTED: serine/arginine repetitive matrix protein 2-like [Hyalella azteca]		[A] KOG0106 Alternative splicing factor SRp55/B52/SRp75 (RRM superfamily)	Uncharacterized protein DDB_G0287625 OS=Dictyostelium discoideum GN=DDB_G0287625 PE=4 SV=1	GO:0005634//nucleus
CL305.Contig1_All	0.186	0.43	1.25719	1.14462e-05	1.516e-05		K12866//WW domain-binding protein 11+ko03040//Spliceosome
CL305.Contig27_All	0.776	2.276	1.5661	3.75346e-37	1.58584e-37		K13165//splicing factor, arginine/serine-rich 12;K13170//splicing factor, arginine/serine-rich 18;K22909//zinc finger CCCH domain-containing protein 13;K12893//splicing factor, arginine/serine-rich 4/5/6+ko03040//Spliceosome+ko05168//Herpes simplex infection		probable splicing factor, arginine/serine-rich 7 isoform X9 [Mizuhopecten yessoensis]	Allergen Fel d I-B chain	[A] KOG4676 Splicing factor, arginine/serine-rich	Probable splicing factor, arginine/serine-rich 7 OS=Caenorhabditis elegans GN=rsp-7 PE=3 SV=3
CL305.Contig3_All	0.41	0.88	1.09181	3.20604e-06	4.05355e-06
CL305.Contig43_All	1.076	2.63	1.28683	1.86376e-26	1.00825e-26
CL305.Contig6_All	0.026	0.34	3.76039	3.05899e-12	2.6979e-12
CL3057.Contig3_All	2.453	8.083	1.72188	5.15751e-118	8.05021e-119
CL3061.Contig1_All	4.63	9.233	1.0414	4.67711e-35	2.06759e-35
CL3081.Contig11_All	0	0.71	8.77212	4.36171e-43	1.64607e-43		K10268//F-box and leucine-rich repeat protein 2/20;K10268//F-box and leucine-rich repeat protein 2/20;K10268//F-box and leucine-rich repeat protein 2/20;K10268//F-box and leucine-rich repeat protein 2/20;K10268//F-box and leucine-rich repeat protein 2/20	XM_018028149.1 PREDICTED: Ceratina calcarata F-box/LRR-repeat protein 20 (LOC108627078), transcript variant X3, mRNA	F-box/LRR-repeat protein 2 isoform X1 [Zootermopsis nevadensis]	Leucine Rich repeat	[R] KOG4341 F-box protein containing LRR	F-box/LRR-repeat protein 20 OS=Homo sapiens GN=FBXL20 PE=1 SV=2
CL3081.Contig15_All	0.23	0.583	1.37965	2.22825e-08	2.41717e-08		K10268//F-box and leucine-rich repeat protein 2/20;K10268//F-box and leucine-rich repeat protein 2/20;K10268//F-box and leucine-rich repeat protein 2/20;K10268//F-box and leucine-rich repeat protein 2/20;K10268//F-box and leucine-rich repeat protein 2/20	XM_018028149.1 PREDICTED: Ceratina calcarata F-box/LRR-repeat protein 20 (LOC108627078), transcript variant X3, mRNA	F-box/LRR-repeat protein 20 [Nilaparvata lugens]	Leucine Rich repeat	[R] KOG4341 F-box protein containing LRR	F-box/LRR-repeat protein 20 OS=Homo sapiens GN=FBXL20 PE=1 SV=2
CL3081.Contig3_All	0	0.063	4.92273	4.86066e-05	6.78803e-05		K10268//F-box and leucine-rich repeat protein 2/20;K10268//F-box and leucine-rich repeat protein 2/20;K10268//F-box and leucine-rich repeat protein 2/20;K10268//F-box and leucine-rich repeat protein 2/20;K10268//F-box and leucine-rich repeat protein 2/20	XM_018028149.1 PREDICTED: Ceratina calcarata F-box/LRR-repeat protein 20 (LOC108627078), transcript variant X3, mRNA	F-box/LRR-repeat protein 20 isoform X5 [Zootermopsis nevadensis]	Leucine Rich repeat	[R] KOG4341 F-box protein containing LRR	F-box/LRR-repeat protein 20 OS=Homo sapiens GN=FBXL20 PE=1 SV=2
CL3083.Contig1_All	0	0.28	6.01851	3.75566e-09	3.8912e-09				hypothetical protein TcasGA2_TC033273 [Tribolium castaneum]	Cytidylate kinase-like family
CL3086.Contig1_All	2.986	8.886	1.57282	1.57501e-140	2.08689e-141			BX648792.1 Homo sapiens mRNA; cDNA DKFZp686K19184 (from clone DKFZp686K19184)			[T] KOG0371 Serine/threonine protein phosphatase 2A, catalytic subunit	Serine/threonine-protein phosphatase PP2A OS=Drosophila melanogaster GN=mts PE=2 SV=1
CL3099.Contig1_All	0.1	0.593	2.52082	9.98667e-22	6.15809e-22		K01435//biotinidase [EC:3.5.1.12]+ko00780//Biotin metabolism+ko04977//Vitamin digestion and absorption+ko01100//Metabolic pathways;K01435//biotinidase [EC:3.5.1.12]+ko00780//Biotin metabolism+ko04977//Vitamin digestion and absorption+ko01100//Metabolic pathways;K01435//biotinidase [EC:3.5.1.12]+ko00780//Biotin metabolism+ko04977//Vitamin digestion and absorption+ko01100//Metabolic pathways;K01435…		vanin-like protein 2 isoform X6 [Myzus persicae]	Carbon-nitrogen hydrolase	[E] KOG0806 Carbon-nitrogen hydrolase	Vanin-like protein 1 OS=Drosophila melanogaster GN=vanin-like PE=1 SV=1
CL310.Contig1_All	0	3.403	10.0256	3.12166e-85	6.61996e-86
CL310.Contig6_All	0.246	30.006	6.9063	0	0
CL3117.Contig1_All	0.433	1.053	1.26991	8.32447e-10	8.25933e-10		K11165//dehydrogenase/reductase SDR family member 7 [EC:1.1.-.-];K11165//dehydrogenase/reductase SDR family member 7 [EC:1.1.-.-];K11165//dehydrogenase/reductase SDR family member 7 [EC:1.1.-.-];K11165//dehydrogenase/reductase SDR family member 7 [EC:1.1.-.-];K11165//dehydrogenase/reductase SDR family member 7 [EC:1.1.-.-]		PREDICTED: dehydrogenase/reductase SDR family member 7 [Bemisia tabaci]	short chain dehydrogenase	[Q] KOG1205 Predicted dehydrogenase	Dehydrogenase/reductase SDR family member 7 OS=Homo sapiens GN=DHRS7 PE=1 SV=1	GO:0016021//integral component of membrane
CL312.Contig3_All	0	0.45	7.18419	1.09768e-17	7.7816e-18					Domain of unknown function (DUF1980)
CL312.Contig4_All	0.013	2.533	7.38478	2.9403e-94	5.62493e-95				PREDICTED: uncharacterized protein LOC108580038 [Habropoda laboriosa] >KOC68159.1 hypothetical protein WH47_03317 [Habropoda laboriosa]	Haemolymph juvenile hormone binding protein (JHBP)			GO:0008289//lipid binding
CL312.Contig7_All	0.41	1.033	1.31594	7.41257e-12	6.67213e-12			FN410068.1 Equus caballus microsatellite DNA, locus ABGe15646	PREDICTED: uncharacterized protein LOC105694290 [Orussus abietinus]	Haemolymph juvenile hormone binding protein (JHBP)			GO:0008289//lipid binding
CL313.Contig2_All	0.7	1.46	1.05244	5.96803e-21	3.77803e-21		K05096//FMS-like tyrosine kinase 1 [EC:2.7.10.1]+ko04510//Focal adhesion+ko05323//Rheumatoid arthritis+ko05202//Transcriptional misregulation in cancer+ko04151//PI3K-Akt signaling pathway+ko04010//MAPK signaling pathway+ko04014//Ras signaling pathway+ko04015//Rap1 signaling pathway+ko04066//HIF-1 signaling pathway;K05096//FMS-like tyrosine kinase 1 [EC:2.7.10.1]+ko04510//Focal adhesion+ko05323//R…		PREDICTED: vascular endothelial growth factor receptor 1 isoform X2 [Diuraphis noxia]	Protein tyrosine kinase	[T] KOG0200 Fibroblast/platelet-derived growth factor receptor and related receptor tyrosine kinases	Vascular endothelial growth factor receptor kdr-like OS=Danio rerio GN=kdrl PE=1 SV=1
CL3130.Contig2_All	1.49	3.27	1.13152	2.34595e-62	6.50746e-63		K05658//ATP-binding cassette, subfamily B (MDR/TAP), member 1 [EC:7.6.2.2]+ko05226//Gastric cancer+ko04976//Bile secretion+ko02010//ABC transporters+ko05206//MicroRNAs in cancer;K05658//ATP-binding cassette, subfamily B (MDR/TAP), member 1 [EC:7.6.2.2]+ko05226//Gastric cancer+ko04976//Bile secretion+ko02010//ABC transporters+ko05206//MicroRNAs in cancer;K05658//ATP-binding cassette, subfamily B (…	XM_002110919.1 Trichoplax adhaerens hypothetical protein, mRNA	PREDICTED: multidrug resistance protein 1A isoform X2 [Acyrthosiphon pisum]	ABC transporter transmembrane region	[Q] KOG0055 Multidrug/pheromone exporter, ABC superfamily	Multidrug resistance protein 1 OS=Cricetulus griseus GN=ABCB1 PE=1 SV=2
CL314.Contig1_All	11.403	33.306	1.55948	6.88749e-119	1.06681e-119
CL3150.Contig1_All	1.456	4.98	1.78514	2.61061e-63	7.15648e-64	ZBTB	K10523//speckle-type POZ protein+ko04341//Hedgehog signaling pathway - fly+ko04340//Hedgehog signaling pathway;K10523//speckle-type POZ protein+ko04341//Hedgehog signaling pathway - fly+ko04340//Hedgehog signaling pathway;K10523//speckle-type POZ protein+ko04341//Hedgehog signaling pathway - fly+ko04340//Hedgehog signaling pathway;K10523//speckle-type POZ protein+ko04341//Hedgehog signaling pathw…		PREDICTED: speckle-type POZ protein-like [Aplysia californica] >XP_005095092.1 PREDICTED: speckle-type POZ protein-like [Aplysia californica]	BTB/POZ domain	[DR] KOG1987 Speckle-type POZ protein SPOP and related proteins with TRAF, MATH and BTB/POZ domains	Speckle-type POZ protein-like OS=Homo sapiens GN=SPOPL PE=1 SV=1	GO:0046330//positive regulation of JNK cascade;GO:0005634//nucleus;GO:0046331//lateral inhibition;GO:1901044//protein polyubiquitination involved in nucleus-associated proteasomal ubiquitin-dependent protein catabolic process;GO:0042067//establishment of ommatidial planar polarity;GO:0042803//protein homodimerization activity;GO:0045879//negative regulation of smoothened signaling pathway;GO:0043…
CL3157.Contig1_All	3.743	9.48	1.3408	2.50488e-111	4.13034e-112		K16733//Rac GTPase-activating protein 1;K16733//Rac GTPase-activating protein 1;K16733//Rac GTPase-activating protein 1;K16733//Rac GTPase-activating protein 1;K16733//Rac GTPase-activating protein 1	BX537323.9 Zebrafish DNA sequence from clone DKEYP-122E2 in linkage group 18, complete sequence	PREDICTED: rac GTPase-activating protein 1-like [Ceratina calcarata]	RhoGAP domain	[R] KOG3564 GTPase-activating protein	Rac GTPase-activating protein 1 OS=Homo sapiens GN=RACGAP1 PE=1 SV=1
CL3166.Contig2_All	0.01	0.1	3.59951	1.50596e-06	1.85283e-06		K21842//protein EFR3;K21842//protein EFR3;K21842//protein EFR3;K21842//protein EFR3;K21842//protein EFR3		PREDICTED: protein EFR3 homolog cmp44E isoform X1 [Apis cerana]	Domain of unknown function (DUF3554)	[R] KOG1877 Putative transmembrane protein cmp44E	Protein EFR3 homolog cmp44E OS=Drosophila melanogaster GN=stmA PE=2 SV=3
CL3168.Contig1_All	0.1	1.566	3.96596	4.30157e-30	2.12788e-30				PREDICTED: uncharacterized protein LOC109411677 isoform X1 [Aedes albopictus]	Tetratricopeptide repeat protein 5 OB fold domain
CL3168.Contig2_All	0	0.85	6.94082	2.07836e-15	1.61096e-15				PREDICTED: uncharacterized protein LOC109411677 isoform X1 [Aedes albopictus]	Tetratricopeptide repeat protein 5 OB fold domain
CL3178.Contig1_All	0.53	3.096	2.56469	1.14902e-15	8.81246e-16
CL318.Contig9_All	0.233	0.893	1.92526	6.43132e-11	6.03706e-11		K01201//glucosylceramidase [EC:3.2.1.45]+ko04142//Lysosome+ko00511//Other glycan degradation+ko00600//Sphingolipid metabolism+ko01100//Metabolic pathways;K01201//glucosylceramidase [EC:3.2.1.45]+ko04142//Lysosome+ko00511//Other glycan degradation+ko00600//Sphingolipid metabolism+ko01100//Metabolic pathways;K01201//glucosylceramidase [EC:3.2.1.45]+ko04142//Lysosome+ko00511//Other glycan degradatio…		glucosylceramidase-like isoform X1 [Zootermopsis nevadensis] >KDR10552.1 Glucosylceramidase [Zootermopsis nevadensis]	Glycosyl hydrolase family 30 TIM-barrel domain	[G] KOG2566 Beta-glucocerebrosidase	Glucosylceramidase OS=Bos taurus GN=GBA PE=2 SV=1
CL3186.Contig1_All	0	0.866	4.44215	0.000600729	0.000941448
CL3189.Contig1_All	0.103	0.413	1.98217	3.1364e-05	4.30233e-05				hypothetical protein TRFO_30287 [Tritrichomonas foetus]
CL3191.Contig1_All	0.67	1.403	1.07412	7.04279e-09	7.40642e-09		K18164//NADH dehydrogenase [ubiquinone] 1 alpha subcomplex assembly factor 7+ko04714//Thermogenesis;K18164//NADH dehydrogenase [ubiquinone] 1 alpha subcomplex assembly factor 7+ko04714//Thermogenesis;K18164//NADH dehydrogenase [ubiquinone] 1 alpha subcomplex assembly factor 7+ko04714//Thermogenesis;K18164//NADH dehydrogenase [ubiquinone] 1 alpha subcomplex assembly factor 7+ko04714//Thermogenesis…		PREDICTED: NADH dehydrogenase [ubiquinone] complex I, assembly factor 7 [Bemisia tabaci]	Putative S-adenosyl-L-methionine-dependent methyltransferase	[S] KOG2901 Uncharacterized conserved protein	Protein arginine methyltransferase NDUFAF7, mitochondrial OS=Danio rerio GN=ndufaf7 PE=2 SV=1
CL3191.Contig2_All	0.683	1.53	1.1707	0.000404296	0.000620991		K18164//NADH dehydrogenase [ubiquinone] 1 alpha subcomplex assembly factor 7+ko04714//Thermogenesis;K18164//NADH dehydrogenase [ubiquinone] 1 alpha subcomplex assembly factor 7+ko04714//Thermogenesis;K18164//NADH dehydrogenase [ubiquinone] 1 alpha subcomplex assembly factor 7+ko04714//Thermogenesis;K18164//NADH dehydrogenase [ubiquinone] 1 alpha subcomplex assembly factor 7+ko04714//Thermogenesis		protein arginine methyltransferase NDUFAF7, mitochondrial isoform X1 [Zootermopsis nevadensis] >KDR16883.1 MidA-like protein, mitochondrial [Zootermopsis nevadensis]		[S] KOG2901 Uncharacterized conserved protein	Protein arginine methyltransferase NDUFAF7, mitochondrial OS=Mus musculus GN=Ndufaf7 PE=1 SV=4
CL3195.Contig1_All	0.183	3.203	4.1165	1.61453e-57	4.78218e-58
CL3195.Contig2_All	0.136	0.666	2.27575	5.39183e-10	5.29162e-10
CL320.Contig13_All	1.436	5.77	2.02107	4.96273e-178	5.15153e-179	MBD	K17497//phosphomannomutase [EC:5.4.2.8]+ko00051//Fructose and mannose metabolism+ko00520//Amino sugar and nucleotide sugar metabolism+ko01100//Metabolic pathways;K17497//phosphomannomutase [EC:5.4.2.8]+ko00051//Fructose and mannose metabolism+ko00520//Amino sugar and nucleotide sugar metabolism+ko01100//Metabolic pathways;K17497//phosphomannomutase [EC:5.4.2.8]+ko00051//Fructose and mannose metab…		hypothetical protein BRAFLDRAFT_113552 [Branchiostoma floridae] >EEN55194.1 hypothetical protein BRAFLDRAFT_113552 [Branchiostoma floridae]	Eukaryotic phosphomannomutase	[I] KOG3189 Phosphomannomutase	Probable phosphomannomutase OS=Drosophila melanogaster GN=CG10688 PE=2 SV=1	GO:0006013//mannose metabolic process;GO:0045047//protein targeting to ER;GO:0004615//phosphomannomutase activity;GO:0005829//cytosol;GO:0006487//protein N-linked glycosylation;GO:0009298//GDP-mannose biosynthetic process
CL320.Contig14_All	0.11	0.496	2.16557	3.62643e-18	2.52628e-18	MBD	K17497//phosphomannomutase [EC:5.4.2.8]+ko00051//Fructose and mannose metabolism+ko00520//Amino sugar and nucleotide sugar metabolism+ko01100//Metabolic pathways;K17497//phosphomannomutase [EC:5.4.2.8]+ko00051//Fructose and mannose metabolism+ko00520//Amino sugar and nucleotide sugar metabolism+ko01100//Metabolic pathways;K17497//phosphomannomutase [EC:5.4.2.8]+ko00051//Fructose and mannose metab…		hypothetical protein BRAFLDRAFT_113552 [Branchiostoma floridae] >EEN55194.1 hypothetical protein BRAFLDRAFT_113552 [Branchiostoma floridae]	Eukaryotic phosphomannomutase	[I] KOG3189 Phosphomannomutase	Probable phosphomannomutase OS=Drosophila melanogaster GN=CG10688 PE=2 SV=1	GO:0006013//mannose metabolic process;GO:0045047//protein targeting to ER;GO:0004615//phosphomannomutase activity;GO:0005829//cytosol;GO:0006487//protein N-linked glycosylation;GO:0009298//GDP-mannose biosynthetic process
CL320.Contig4_All	8.436	28.41	1.75218	0	0	MBD	K17497//phosphomannomutase [EC:5.4.2.8]+ko00051//Fructose and mannose metabolism+ko00520//Amino sugar and nucleotide sugar metabolism+ko01100//Metabolic pathways;K17497//phosphomannomutase [EC:5.4.2.8]+ko00051//Fructose and mannose metabolism+ko00520//Amino sugar and nucleotide sugar metabolism+ko01100//Metabolic pathways;K17497//phosphomannomutase [EC:5.4.2.8]+ko00051//Fructose and mannose metab…		probable phosphomannomutase isoform X1 [Zootermopsis nevadensis]	Eukaryotic phosphomannomutase	[I] KOG3189 Phosphomannomutase	Phosphomannomutase 2 OS=Macaca fascicularis GN=PMM2 PE=2 SV=1	GO:0004615//phosphomannomutase activity;GO:0005737//cytoplasm;GO:0009298//GDP-mannose biosynthetic process
CL3200.Contig1_All	0	0.276	5.21524	6.93219e-06	9.00734e-06				PREDICTED: RING finger and SPRY domain-containing protein 1-like [Bemisia tabaci]		[A] KOG2242 Scaffold/matrix specific factor hnRNP-U/SAF-A, contains SPRY domain	RING finger and SPRY domain-containing protein 1 OS=Homo sapiens GN=RSPRY1 PE=1 SV=1
CL3201.Contig4_All	3.576	8.1	1.18957	2.5531e-105	4.43463e-106		K20639//Rho GTPase-activating protein 18/28/40;K20639//Rho GTPase-activating protein 18/28/40;K20639//Rho GTPase-activating protein 18/28/40;K20639//Rho GTPase-activating protein 18/28/40		PREDICTED: uncharacterized protein LOC109043088 isoform X1 [Bemisia tabaci] >XP_018915682.1 PREDICTED: uncharacterized protein LOC109043088 isoform X1 [Bemisia tabaci] >XP_018915683.1 PREDICTED: uncharacterized protein LOC109043088 isoform X1 [Bemisia tabaci]	RhoGAP domain	[T] KOG1453 Chimaerin and related Rho GTPase activating proteins	Rho GTPase-activating protein conundrum OS=Drosophila melanogaster GN=conu PE=1 SV=1	GO:0007165//signal transduction
CL321.Contig3_All	0	0.333	6.6074	9.38309e-13	8.09599e-13					Glucose-regulated metallo-peptidase M90
CL321.Contig4_All	0	0.886	8.10416	1.03447e-29	5.1656e-30					Glucose-regulated metallo-peptidase M90
CL3215.Contig3_All	2.286	4.653	1.01519	2.03045e-68	5.20634e-69		K09566//peptidyl-prolyl isomerase G (cyclophilin G) [EC:5.2.1.8];K15187//YEATS domain-containing protein 1/3+ko05202//Transcriptional misregulation in cancer;K15076//elongin-A;K18626//trichohyalin;K15187//YEATS domain-containing protein 1/3+ko05202//Transcriptional misregulation in cancer		PREDICTED: uncharacterized protein LOC105146527 isoform X1 [Acromyrmex echinatior] >EGI65098.1 Protein suppressor of sable [Acromyrmex echinatior]	Nitrile hydratase, alpha chain	[A] KOG1040 Polyadenylation factor I complex, subunit, Yth1 (CPSF subunit)	Zinc finger CCCH domain-containing protein 6 OS=Homo sapiens GN=ZC3H6 PE=1 SV=2	GO:0046872//metal ion binding
CL322.Contig4_All	0.386	0.873	1.17218	3.01828e-13	2.54881e-13	MYB	K09420//transcriptional activator Myb+ko04151//PI3K-Akt signaling pathway;K09420//transcriptional activator Myb+ko04151//PI3K-Akt signaling pathway;K09420//transcriptional activator Myb+ko04151//PI3K-Akt signaling pathway;K09420//transcriptional activator Myb+ko04151//PI3K-Akt signaling pathway;K09420//transcriptional activator Myb+ko04151//PI3K-Akt signaling pathway	XM_022324713.1 PREDICTED: Myzus persicae transcriptional activator Myb (LOC111040700), transcript variant X5, mRNA	PREDICTED: myb-related protein B isoform X3 [Diuraphis noxia]	Myb-like DNA-binding domain	[K] KOG0048 Transcription factor, Myb superfamily	Myb protein OS=Drosophila melanogaster GN=Myb PE=1 SV=2
CL326.Contig2_All	0.013	0.916	6.18076	3.10185e-47	1.08936e-47		K08145//MFS transporter, SP family, solute carrier family 2 (facilitated glucose transporter), member 8;K08145//MFS transporter, SP family, solute carrier family 2 (facilitated glucose transporter), member 8;K08145//MFS transporter, SP family, solute carrier family 2 (facilitated glucose transporter), member 8;K08145//MFS transporter, SP family, solute carrier family 2 (facilitated glucose transp…		PREDICTED: facilitated trehalose transporter Tret1-like [Aedes albopictus]	Sugar (and other) transporter	[R] KOG0254 Predicted transporter (major facilitator superfamily)	Glucose transporter type 3 OS=Drosophila melanogaster GN=Glut3 PE=2 SV=1	GO:0016021//integral component of membrane
CL3261.Contig2_All	5.126	11.8	1.20643	2.36813e-103	4.17511e-104		K09585//thioredoxin domain-containing protein 10 [EC:5.3.4.1];K09585//thioredoxin domain-containing protein 10 [EC:5.3.4.1];K09585//thioredoxin domain-containing protein 10 [EC:5.3.4.1];K09585//thioredoxin domain-containing protein 10 [EC:5.3.4.1];K09585//thioredoxin domain-containing protein 10 [EC:5.3.4.1]		protein disulfide-isomerase TMX3-like, partial [Nilaparvata lugens]	Thioredoxin	[R] KOG4277 Uncharacterized conserved protein, contains thioredoxin domain	Protein disulfide-isomerase 2 OS=Dictyostelium discoideum GN=pdi2 PE=3 SV=1
CL3262.Contig3_All	0.09	0.3	1.70236	3.52974e-07	4.15013e-07		K13096//splicing factor 4;K13096//splicing factor 4;K13096//splicing factor 4;K13096//splicing factor 4;K13096//splicing factor 4		PREDICTED: uncharacterized protein LOC107041531 [Diachasma alloeum]	Surp module	[R] KOG0965 Predicted RNA-binding protein, contains SWAP and G-patch domains	SURP and G-patch domain-containing protein 1 OS=Homo sapiens GN=SUGP1 PE=1 SV=2	GO:0006396//RNA processing;GO:0003723//RNA binding
CL3270.Contig1_All	2.25	9.256	2.03629	1.23756e-295	7.66752e-297		K12842//U2-associated protein SR140+ko03040//Spliceosome;K12842//U2-associated protein SR140+ko03040//Spliceosome;K12842//U2-associated protein SR140+ko03040//Spliceosome;K12842//U2-associated protein SR140+ko03040//Spliceosome;K12842//U2-associated protein SR140+ko03040//Spliceosome	XM_014440933.1 PREDICTED: Microplitis demolitor U2 snRNP-associated SURP motif-containing protein (LOC103568299), mRNA	U2 snRNP-associated SURP motif-containing protein [Nilaparvata lugens]	Surp module	[R] KOG0151 Predicted splicing regulator, contains RRM, SWAP and RPR domains	U2 snRNP-associated SURP motif-containing protein OS=Homo sapiens GN=U2SURP PE=1 SV=2
CL328.Contig3_All	0.306	0.79	1.36203	0.000481413	0.000745091		K08669//HtrA serine peptidase 2 [EC:3.4.21.108]+ko04214//Apoptosis - fly+ko04215//Apoptosis - multiple species+ko04210//Apoptosis+ko05012//Parkinson disease;K08669//HtrA serine peptidase 2 [EC:3.4.21.108]+ko04214//Apoptosis - fly+ko04215//Apoptosis - multiple species+ko04210//Apoptosis+ko05012//Parkinson disease;K08669//HtrA serine peptidase 2 [EC:3.4.21.108]+ko04214//Apoptosis - fly+ko04215//Apo…		PREDICTED: serine protease HTRA2, mitochondrial [Bemisia tabaci]	PDZ domain	[O] KOG1320 Serine protease	Serine protease HTRA2, mitochondrial OS=Drosophila ananassae GN=HtrA2 PE=3 SV=1
CL3280.Contig2_All	0	1.353	5.78426	4.96009e-08	5.49761e-08
CL3282.Contig1_All	1.86	6.01	1.68576	6.68198e-123	1.00084e-123	zf-C2H2	K09228//KRAB domain-containing zinc finger protein;K09228//KRAB domain-containing zinc finger protein;K09228//KRAB domain-containing zinc finger protein;K09228//KRAB domain-containing zinc finger protein;K09228//KRAB domain-containing zinc finger protein		PREDICTED: gastrula zinc finger protein XlCGF57.1-like isoform X1 [Nothobranchius furzeri]	Zinc finger, C2H2 type	[R] KOG1721 FOG: Zn-finger	Zinc finger protein 84 OS=Homo sapiens GN=ZNF84 PE=1 SV=2
CL3287.Contig1_All	0.846	2.723	1.68325	3.03024e-18	2.10503e-18		K16310//serine/threonine-protein kinase NIM1 [EC:2.7.11.1];K17259//calcium and integrin-binding protein 1;K17259//calcium and integrin-binding protein 1		calcium and integrin-binding family member 3 [Nilaparvata lugens]	EF hand	[R] KOG0038 Ca2+-binding kinase interacting protein (KIP) (EF-Hand protein superfamily)	Calcium and integrin-binding family member 3 OS=Mus musculus GN=Cib3 PE=1 SV=1
CL329.Contig3_All	0.733	2.18	1.57656	5.82901e-37	2.4729e-37
CL329.Contig4_All	2.59	6.926	1.42645	9.16086e-95	1.74455e-95
CL3291.Contig5_All	1.316	4.006	1.61615	1.32663e-41	5.13204e-42		K16816//patatin-like phospholipase domain-containing protein 2 [EC:3.1.1.3]+ko04714//Thermogenesis+ko00561//Glycerolipid metabolism+ko01100//Metabolic pathways+ko04923//Regulation of lipolysis in adipocytes		Mitochondrial sodium/hydrogen exchanger NHA2 [Zootermopsis nevadensis]	Sodium/hydrogen exchanger family	[P] KOG3826 Na+/H+ antiporter	Sodium/hydrogen exchanger 9B2 OS=Mus musculus GN=Slc9b2 PE=1 SV=2
CL3295.Contig1_All	0.65	7.583	3.53097	0	0	Tub	K10838//xeroderma pigmentosum group C-complementing protein+ko03420//Nucleotide excision repair;K10838//xeroderma pigmentosum group C-complementing protein+ko03420//Nucleotide excision repair;K10838//xeroderma pigmentosum group C-complementing protein+ko03420//Nucleotide excision repair;K10838//xeroderma pigmentosum group C-complementing protein+ko03420//Nucleotide excision repair;K10838//xeroder…		PREDICTED: DNA repair protein complementing XP-C cells homolog [Aedes albopictus]	Rad4 beta-hairpin domain 3	[K] KOG4210 Nuclear localization sequence binding protein	DNA repair protein complementing XP-C cells homolog OS=Drosophila melanogaster GN=Xpc PE=1 SV=2	GO:0005634//nucleus;GO:0003684//damaged DNA binding;GO:0006289//nucleotide-excision repair
CL3298.Contig1_All	0.643	1.316	1.04947	2.03126e-05	2.74066e-05
CL330.Contig11_All	1.27	9.62	2.90924	0	0		K22909//zinc finger CCCH domain-containing protein 13;K13172//serine/arginine repetitive matrix protein 2;K22909//zinc finger CCCH domain-containing protein 13;K22909//zinc finger CCCH domain-containing protein 13;K22909//zinc finger CCCH domain-containing protein 13	XM_019912273.1 PREDICTED: Dendroctonus ponderosae protein PRRC2C (LOC109542844), transcript variant X11, mRNA	PREDICTED: protein PRRC2C-like isoform X5 [Dinoponera quadriceps]	BAT2 N-terminus	[A] KOG4676 Splicing factor, arginine/serine-rich	Protein PRRC2A OS=Homo sapiens GN=PRRC2A PE=1 SV=3
CL330.Contig13_All	0	0.023	5.34262	2.64818e-06	3.32462e-06		K22909//zinc finger CCCH domain-containing protein 13;K13172//serine/arginine repetitive matrix protein 2;K22909//zinc finger CCCH domain-containing protein 13;K22909//zinc finger CCCH domain-containing protein 13;K22909//zinc finger CCCH domain-containing protein 13	XM_019912273.1 PREDICTED: Dendroctonus ponderosae protein PRRC2C (LOC109542844), transcript variant X11, mRNA	PREDICTED: protein PRRC2C-like isoform X5 [Dinoponera quadriceps]	BAT2 N-terminus	[A] KOG4676 Splicing factor, arginine/serine-rich	Protein PRRC2A OS=Homo sapiens GN=PRRC2A PE=1 SV=3
CL330.Contig4_All	0.373	0.896	1.27483	7.03345e-43	2.66125e-43		K22909//zinc finger CCCH domain-containing protein 13;K22909//zinc finger CCCH domain-containing protein 13;K22909//zinc finger CCCH domain-containing protein 13;K22909//zinc finger CCCH domain-containing protein 13;K22909//zinc finger CCCH domain-containing protein 13	XM_019912273.1 PREDICTED: Dendroctonus ponderosae protein PRRC2C (LOC109542844), transcript variant X11, mRNA	PREDICTED: protein PRRC2C-like isoform X5 [Dinoponera quadriceps]	BAT2 N-terminus	[A] KOG4676 Splicing factor, arginine/serine-rich	Protein PRRC2A OS=Homo sapiens GN=PRRC2A PE=1 SV=3
CL3306.Contig1_All	2.27	6.686	1.54898	1.95481e-118	3.04696e-119		K05292//phosphatidylinositol glycan, class T+ko00563//Glycosylphosphatidylinositol (GPI)-anchor biosynthesis+ko01100//Metabolic pathways;K05292//phosphatidylinositol glycan, class T+ko00563//Glycosylphosphatidylinositol (GPI)-anchor biosynthesis+ko01100//Metabolic pathways;K05292//phosphatidylinositol glycan, class T+ko00563//Glycosylphosphatidylinositol (GPI)-anchor biosynthesis+ko01100//Metabol…	XM_011636424.1 PREDICTED: Pogonomyrmex barbatus GPI transamidase component PIG-T (LOC105425583), mRNA	PREDICTED: GPI transamidase component PIG-T [Bemisia tabaci]	Gpi16 subunit, GPI transamidase component	[MO] KOG2407 GPI transamidase complex, GPI16/PIG-T component, involved in glycosylphosphatidylinositol anchor biosynthesis	GPI transamidase component PIG-T OS=Homo sapiens GN=PIGT PE=1 SV=1
CL3314.Contig1_All	1.106	3.09	1.49089	3.0241e-56	9.13147e-57		K04456//RAC serine/threonine-protein kinase [EC:2.7.11.1]+ko04024//cAMP signaling pathway+ko04022//cGMP-PKG signaling pathway+ko04140//Autophagy - animal+ko04630//Jak-STAT signaling pathway+ko05222//Small cell lung cancer+ko05223//Non-small cell lung cancer+ko05226//Gastric cancer+ko05225//Hepatocellular carcinoma+ko04510//Focal adhesion+ko04933//AGE-RAGE signaling pathway in diabetic complicatio…	XM_020431057.1 PREDICTED: Pseudomyrmex gracilis RAC-beta serine/threonine-protein kinase B (LOC109856121), mRNA	RAC serine/threonine-protein kinase isoform X4 [Zootermopsis nevadensis] >KDR08900.1 RAC serine/threonine-protein kinase [Zootermopsis nevadensis]	Protein kinase domain	[T] KOG0690 Serine/threonine protein kinase	RAC serine/threonine-protein kinase OS=Drosophila melanogaster GN=Akt1 PE=1 SV=3
CL3327.Contig8_All	0.656	6.396	3.27507	0	0		K10366//dystrophin+ko05414//Dilated cardiomyopathy (DCM)+ko05416//Viral myocarditis+ko05410//Hypertrophic cardiomyopathy (HCM)+ko05412//Arrhythmogenic right ventricular cardiomyopathy (ARVC);K10366//dystrophin+ko05414//Dilated cardiomyopathy (DCM)+ko05416//Viral myocarditis+ko05410//Hypertrophic cardiomyopathy (HCM)+ko05412//Arrhythmogenic right ventricular cardiomyopathy (ARVC);K10366//dystrophi…	XM_009016214.1 Helobdella robusta hypothetical protein partial mRNA	dystrophin-like [Nilaparvata lugens]	Spectrin repeat	[NTZ] KOG4286 Dystrophin-like protein	Dystrophin, isoforms A/C/F/G/H OS=Drosophila melanogaster GN=Dys PE=1 SV=3
CL3327.Contig9_All	0	2.266	11.0379	1.38221e-145	1.77434e-146		K10366//dystrophin+ko05414//Dilated cardiomyopathy (DCM)+ko05416//Viral myocarditis+ko05410//Hypertrophic cardiomyopathy (HCM)+ko05412//Arrhythmogenic right ventricular cardiomyopathy (ARVC);K10366//dystrophin+ko05414//Dilated cardiomyopathy (DCM)+ko05416//Viral myocarditis+ko05410//Hypertrophic cardiomyopathy (HCM)+ko05412//Arrhythmogenic right ventricular cardiomyopathy (ARVC);K10366//dystrophi…	XM_009016214.1 Helobdella robusta hypothetical protein partial mRNA	dystrophin-like [Nilaparvata lugens]	Spectrin repeat	[NTZ] KOG4286 Dystrophin-like protein	Dystrophin, isoforms A/C/F/G/H OS=Drosophila melanogaster GN=Dys PE=1 SV=3
CL3341.Contig2_All	6.366	32.25	2.33181	0	0	zf-C2H2	K12567//titin [EC:2.7.11.1]+ko05414//Dilated cardiomyopathy (DCM)+ko05410//Hypertrophic cardiomyopathy (HCM);K04574//neurofilament heavy polypeptide+ko05014//Amyotrophic lateral sclerosis (ALS);K04574//neurofilament heavy polypeptide+ko05014//Amyotrophic lateral sclerosis (ALS);K04574//neurofilament heavy polypeptide+ko05014//Amyotrophic lateral sclerosis (ALS)		PREDICTED: A-agglutinin anchorage subunit-like [Lates calcarifer]	Cytidylyltransferase family	[K] KOG0260 RNA polymerase II, large subunit	Neurofilament heavy polypeptide OS=Rattus norvegicus GN=Nefh PE=1 SV=4
CL3344.Contig2_All	2.283	7.026	1.61907	7.13804e-39	2.91962e-39			XM_022064974.1 PREDICTED: Zootermopsis nevadensis glucose-induced degradation protein 4 homolog (LOC110830271), transcript variant X3, mRNA	PREDICTED: glucose-induced degradation protein 4 homolog [Solenopsis invicta]		[U] KOG4635 Vacuolar import and degradation protein	Glucose-induced degradation protein 4 homolog OS=Homo sapiens GN=GID4 PE=2 SV=1
CL3345.Contig2_All	18.39	47.013	1.35235	0	0	Homeobox	K12898//heterogeneous nuclear ribonucleoprotein F/H;K12898//heterogeneous nuclear ribonucleoprotein F/H;K12898//heterogeneous nuclear ribonucleoprotein F/H;K12898//heterogeneous nuclear ribonucleoprotein F/H;K12898//heterogeneous nuclear ribonucleoprotein F/H	XM_012314976.2 PREDICTED: Bombus terrestris heterogeneous nuclear ribonucleoprotein H (LOC100644574), transcript variant X2, mRNA	PREDICTED: heterogeneous nuclear ribonucleoprotein F-like [Nasonia vitripennis] >XP_008205130.1 PREDICTED: heterogeneous nuclear ribonucleoprotein F-like [Nasonia vitripennis] >XP_008205131.1 PREDICTED: heterogeneous nuclear ribonucleoprotein F-like [Nasonia vitripennis] >XP_016839651.1 PREDICTED: heterogeneous nuclear ribonucleoprotein F-like [Nasonia vitripennis]	RNA recognition motif. (a.k.a. RRM, RBD, or RNP domain)	[A] KOG4211 Splicing factor hnRNP-F and related RNA-binding proteins	Heterogeneous nuclear ribonucleoprotein H OS=Mus musculus GN=Hnrnph1 PE=1 SV=3	GO:0003723//RNA binding
CL335.Contig2_All	3.16	6.336	1.02746	3.68981e-10	3.59115e-10
CL3350.Contig1_All	0.553	1.953	1.81703	7.86465e-18	5.54373e-18		K04494//chromodomain helicase DNA binding protein 8 [EC:3.6.4.12]+ko04310//Wnt signaling pathway		PREDICTED: FACT complex subunit spt16 [Ceratina calcarata]	Histone chaperone Rttp106-like	[E] KOG1189 Global transcriptional regulator, cell division control protein	FACT complex subunit spt16 OS=Drosophila melanogaster GN=dre4 PE=1 SV=2
CL3350.Contig2_All	1.866	5.126	1.46258	1.46762e-67	3.80465e-68		K04494//chromodomain helicase DNA binding protein 8 [EC:3.6.4.12]+ko04310//Wnt signaling pathway;K12397//AP-3 complex subunit beta+ko04142//Lysosome;K08818//cell division cycle 2-like [EC:2.7.11.22];K18646//acidic leucine-rich nuclear phosphoprotein 32 family member A/C/D;K18646//acidic leucine-rich nuclear phosphoprotein 32 family member A/C/D		PREDICTED: FACT complex subunit spt16 isoform X1 [Megachile rotundata]	FACT complex subunit SPT16 N-terminal lobe domain	[E] KOG1189 Global transcriptional regulator, cell division control protein	FACT complex subunit spt-16 OS=Caenorhabditis briggsae GN=spt-16 PE=3 SV=1
CL3351.Contig1_All	0.536	1.646	1.62515	5.05985e-07	6.01187e-07
CL3355.Contig3_All	0.79	1.73	1.13104	4.22545e-35	1.86655e-35		K02296//aryl hydrocarbon receptor nuclear translocator-like protein 1+ko04728//Dopaminergic synapse+ko04711//Circadian rhythm - fly+ko04710//Circadian rhythm+ko05168//Herpes simplex infection;K09099//aryl hydrocarbon receptor nuclear translocator-like protein 2;K02296//aryl hydrocarbon receptor nuclear translocator-like protein 1+ko04728//Dopaminergic synapse+ko04711//Circadian rhythm - fly+ko047…	XM_004642744.1 PREDICTED: Octodon degus striatin interacting protein 2 (Strip2), transcript variant X2, mRNA	methoprene tolerant [Planococcus kraunhiae]	PAS domain	[K] KOG3561 Aryl-hydrocarbon receptor nuclear translocator	Putative protein TPRXL OS=Homo sapiens GN=TPRXL PE=5 SV=2	GO:0005634//nucleus;GO:0005667//transcription factor complex;GO:0006351//transcription, DNA-templated;GO:0003700//DNA binding transcription factor activity;GO:0005737//cytoplasm;GO:0046983//protein dimerization activity
CL3357.Contig1_All	1.973	7.05	1.84654	6.32415e-72	1.55011e-72		K13130//gem associated protein 2+ko03013//RNA transport;K13130//gem associated protein 2+ko03013//RNA transport;K13130//gem associated protein 2+ko03013//RNA transport;K13130//gem associated protein 2+ko03013//RNA transport;K13130//gem associated protein 2+ko03013//RNA transport		PREDICTED: gem-associated protein 2 [Meleagris gallopavo]	Survival motor neuron (SMN) interacting protein 1 (SIP1)		Gem-associated protein 2 OS=Xenopus laevis GN=gemin2 PE=2 SV=1
CL3358.Contig2_All	1.583	13.786	3.10361	0	0	MBD	K14857//AdoMet-dependent rRNA methyltransferase SPB1 [EC:2.1.1.-];K14857//AdoMet-dependent rRNA methyltransferase SPB1 [EC:2.1.1.-];K14857//AdoMet-dependent rRNA methyltransferase SPB1 [EC:2.1.1.-];K14857//AdoMet-dependent rRNA methyltransferase SPB1 [EC:2.1.1.-];K14857//AdoMet-dependent rRNA methyltransferase SPB1 [EC:2.1.1.-]	XM_011272223.1 Capsaspora owczarzaki ATCC 30864 hypothetical protein partial mRNA	pre-rRNA processing protein FTSJ3 [Myzus persicae]	Spb1 C-terminal domain	[AR] KOG1098 Putative SAM-dependent rRNA methyltransferase SPB1	pre-rRNA processing protein FTSJ3 OS=Mus musculus GN=Ftsj3 PE=1 SV=1	GO:0000453//enzyme-directed rRNA 2'-O-methylation;GO:0005730//nucleolus;GO:0008649//rRNA methyltransferase activity
CL3361.Contig2_All	119.333	244.286	1.06039	0	0
CL3366.Contig2_All	0.336	0.97	1.53081	7.2449e-07	8.71358e-07
CL3382.Contig2_All	3.023	8.46	1.48529	3.62798e-109	6.10447e-110		K00699//glucuronosyltransferase [EC:2.4.1.17]+ko00980//Metabolism of xenobiotics by cytochrome P450+ko00982//Drug metabolism - cytochrome P450+ko00983//Drug metabolism - other enzymes+ko00040//Pentose and glucuronate interconversions+ko00860//Porphyrin and chlorophyll metabolism+ko00053//Ascorbate and aldarate metabolism+ko00830//Retinol metabolism+ko05204//Chemical carcinogenesis+ko00140//Steroi…		UDP-glucuronosyltransferase 2B15-like isoform X3 [Myzus persicae]	UDP-glucoronosyl and UDP-glucosyl transferase	[GC] KOG1192 UDP-glucuronosyl and UDP-glucosyl transferase	UDP-glucuronosyltransferase 2B37 OS=Rattus norvegicus GN=Ugt2b37 PE=2 SV=1
CL3386.Contig2_All	1.493	4.15	1.48875	2.56873e-16	1.9232e-16	ARID	K06709//jumonji domain-containing protein 2 [EC:1.14.11.-];K06709//jumonji domain-containing protein 2 [EC:1.14.11.-];K06709//jumonji domain-containing protein 2 [EC:1.14.11.-];K06709//jumonji domain-containing protein 2 [EC:1.14.11.-];K06709//jumonji domain-containing protein 2 [EC:1.14.11.-]		probable lysine-specific demethylase 4A isoform X2 [Ceratitis capitata]		[L] KOG0958 DNA damage-responsive repressor GIS1/RPH1, jumonji superfamily	Probable lysine-specific demethylase 4A OS=Drosophila melanogaster GN=Kdm4A PE=1 SV=1	GO:0005634//nucleus;GO:0008168//methyltransferase activity
CL34.Contig2_All	0	0.106	6.11216	1.21151e-09	1.2152e-09	Others	K10349//Fem-1 homolog b;K10349//Fem-1 homolog b;K10349//Fem-1 homolog b;K10349//Fem-1 homolog b;K10349//Fem-1 homolog b	LM463787.1 Parascaris equorum genome assembly P_equorum ,scaffold PEQ_scaffold0001029	protein fem-1 homolog B isoform X5 [Zootermopsis nevadensis]	Ankyrin repeats (3 copies)	[R] KOG0508 Ankyrin repeat protein	Protein fem-1 homolog B OS=Gallus gallus GN=FEM1B PE=2 SV=1
CL3416.Contig1_All	0.52	1.58	1.62541	2.83082e-06	3.56376e-06
CL3421.Contig1_All	0.043	8.866	7.69331	0	0				hypothetical protein X975_12720, partial [Stegodyphus mimosarum]
CL3427.Contig1_All	0	2.073	7.35382	1.81218e-19	1.20569e-19
CL343.Contig1_All	0.143	0.39	1.47209	6.91092e-05	9.79623e-05
CL344.Contig5_All	3.04	6.563	1.09997	1.11436e-82	2.44191e-83	Homeobox	K23028//cytospin;K23028//cytospin;K23028//cytospin;K23028//cytospin;K23028//cytospin	XM_002429645.1 Pediculus humanus corporis Cytospin-A, putative, mRNA	PREDICTED: cytospin-A-like isoform X2 [Bemisia tabaci]	Calponin homology (CH) domain	[R] KOG4678 FOG: Calponin homology domain	Cytospin-B OS=Homo sapiens GN=SPECC1 PE=1 SV=1
CL3440.Contig1_All	0.986	5.176	2.389	1.35027e-277	9.20241e-279		K13885//scavenger receptor class B, member 1+ko04145//Phagosome+ko04913//Ovarian steroidogenesis+ko04979//Cholesterol metabolism+ko04975//Fat digestion and absorption+ko04977//Vitamin digestion and absorption+ko04976//Bile secretion+ko04934//Cushing syndrome+ko04927//Cortisol synthesis and secretion+ko04925//Aldosterone synthesis and secretion+ko05160//Hepatitis C;K13885//scavenger receptor class…	AC211978.4 Pan troglodytes BAC clone CH251-610C9 from chromosome 7, complete sequence	PREDICTED: lysosome membrane protein 2 [Acyrthosiphon pisum]	CD36 family	[T] KOG3776 Plasma membrane glycoprotein CD36 and related membrane receptors	Lysosome membrane protein 2 OS=Rattus norvegicus GN=Scarb2 PE=1 SV=2	GO:0016021//integral component of membrane
CL3456.Contig3_All	2.55	6.38	1.32371	0	0		K10779//transcriptional regulator ATRX [EC:3.6.4.12];K13171//serine/arginine repetitive matrix protein 1+ko03013//RNA transport+ko03015//mRNA surveillance pathway;K13171//serine/arginine repetitive matrix protein 1+ko03013//RNA transport+ko03015//mRNA surveillance pathway;K13171//serine/arginine repetitive matrix protein 1+ko03013//RNA transport+ko03015//mRNA surveillance pathway;K13171//serine/a…	XM_015511462.1 PREDICTED: Diuraphis noxia protein split ends (LOC107163720), transcript variant X3, mRNA	PREDICTED: protein split ends isoform X3 [Camponotus floridanus]	SPOC domain	[R] KOG0112 Large RNA-binding protein (RRM superfamily)	Protein split ends OS=Drosophila melanogaster GN=spen PE=1 SV=2
CL346.Contig2_All	0.03	0.21	2.83503	2.38402e-08	2.59184e-08		K10587//ubiquitin-protein ligase E3 A [EC:2.3.2.26]+ko04120//Ubiquitin mediated proteolysis+ko05203//Viral carcinogenesis+ko05165//Human papillomavirus infection;K10587//ubiquitin-protein ligase E3 A [EC:2.3.2.26]+ko04120//Ubiquitin mediated proteolysis+ko05203//Viral carcinogenesis+ko05165//Human papillomavirus infection;K10587//ubiquitin-protein ligase E3 A [EC:2.3.2.26]+ko04120//Ubiquitin medi…		PREDICTED: ubiquitin-protein ligase E3A [Polistes canadensis]	Amino-terminal Zinc-binding domain of ubiquitin ligase E3A	[O] KOG0941 E3 ubiquitin protein ligase	Probable E3 ubiquitin-protein ligase HECTD2 OS=Pongo abelii GN=HECTD2 PE=2 SV=1	GO:0004842//ubiquitin-protein transferase activity;GO:0016874//ligase activity
CL3464.Contig1_All	0.063	1.083	4.06851	4.27181e-05	5.93364e-05
CL3470.Contig1_All	0.293	1.15	1.96451	5.70024e-10	5.60173e-10
CL3488.Contig2_All	1.51	3.016	1.02937	0.000446265	0.00068851
CL349.Contig5_All	1.34	2.853	1.08644	5.5153e-34	2.49447e-34		K20121//formin-binding protein 1;K20121//formin-binding protein 1;K20121//formin-binding protein 1;K20121//formin-binding protein 1;K20121//formin-binding protein 1	XM_018543424.1 PREDICTED: Cyphomyrmex costatus formin-binding protein 1-like (LOC108776723), mRNA	PREDICTED: formin-binding protein 1-like isoform X1 [Bemisia tabaci]	SH3 domain	[Z] KOG3565 Cdc42-interacting protein CIP4	Formin-binding protein 1 homolog OS=Xenopus laevis GN=fnbp1 PE=2 SV=1
CL3490.Contig1_All	7.786	15.763	1.04227	2.9533e-92	5.78142e-93	HMG	K18435//transcription factor SOX9 (SOX group E)+ko04024//cAMP signaling pathway;K18435//transcription factor SOX9 (SOX group E)+ko04024//cAMP signaling pathway;K18435//transcription factor SOX9 (SOX group E)+ko04024//cAMP signaling pathway;K18435//transcription factor SOX9 (SOX group E)+ko04024//cAMP signaling pathway;K18435//transcription factor SOX9 (SOX group E)+ko04024//cAMP signaling pathway		transcription factor SOX-10 isoform X2 [Oryzias latipes]	fzo-like conserved region	[K] KOG0527 HMG-box transcription factor	Transcription factor SOX-8 OS=Homo sapiens GN=SOX8 PE=2 SV=1
CL3495.Contig2_All	0.8	4.566	2.52925	1.12178e-70	2.79836e-71		K17598//synaptotagmin-like protein;K17598//synaptotagmin-like protein;K17598//synaptotagmin-like protein;K17598//synaptotagmin-like protein;K17598//synaptotagmin-like protein		hypothetical protein TcasGA2_TC032155 [Tribolium castaneum]	C2 domain	[TU] KOG1028 Ca2+-dependent phospholipid-binding protein Synaptotagmin, required for synaptic vesicle and secretory granule exocytosis	Synaptotagmin-like protein 4 OS=Rattus norvegicus GN=Sytl4 PE=1 SV=1	GO:0006886//intracellular protein transport;GO:0005622//intracellular;GO:0017137//Rab GTPase binding
CL3499.Contig1_All	1.183	2.52	1.0912	1.75148e-11	1.60489e-11		K03926//periplasmic divalent cation tolerance protein;K03926//periplasmic divalent cation tolerance protein;K03926//periplasmic divalent cation tolerance protein;K03926//periplasmic divalent cation tolerance protein;K03926//periplasmic divalent cation tolerance protein		PREDICTED: protein CutA homolog [Cimex lectularius]	CutA1 divalent ion tolerance protein	[P] KOG3338 Divalent cation tolerance-related protein	Protein CutA homolog OS=Xenopus laevis GN=cuta PE=2 SV=2	GO:0010038//response to metal ion
CL35.Contig2_All	0.033	0.19	2.51864	8.31422e-10	8.24735e-10		K17402//small subunit ribosomal protein S23;K17402//small subunit ribosomal protein S23;K17402//small subunit ribosomal protein S23;K17402//small subunit ribosomal protein S23;K17402//small subunit ribosomal protein S23	LL760547.1 Gongylonema pulchrum genome assembly G_pulchrum_Hokkaido ,scaffold GPUH_scaffold0010663	PREDICTED: 28S ribosomal protein S23, mitochondrial [Polistes canadensis]	Mitochondrial ribosomal protein S23		28S ribosomal protein S23, mitochondrial OS=Homo sapiens GN=MRPS23 PE=1 SV=2	GO:0005840//ribosome;GO:0006412//translation;GO:0003735//structural constituent of ribosome
CL3502.Contig4_All	0.696	1.543	1.14591	1.5172e-07	1.73852e-07	Homeobox	K04710//ceramide synthetase [EC:2.3.1.24]+ko04071//Sphingolipid signaling pathway+ko00600//Sphingolipid metabolism+ko01100//Metabolic pathways;K04710//ceramide synthetase [EC:2.3.1.24]+ko04071//Sphingolipid signaling pathway+ko00600//Sphingolipid metabolism+ko01100//Metabolic pathways;K04710//ceramide synthetase [EC:2.3.1.24]+ko04071//Sphingolipid signaling pathway+ko00600//Sphingolipid metabolis…		PREDICTED: ceramide synthase 6 [Diuraphis noxia]	TLC domain	[U] KOG1607 Protein transporter of the TRAM (translocating chain-associating membrane) superfamily	Ceramide synthase 6 OS=Mus musculus GN=Cers6 PE=1 SV=1	GO:0003677//DNA binding;GO:0005634//nucleus;GO:0016021//integral component of membrane
CL3503.Contig2_All	1.313	2.766	1.0932	3.91592e-07	4.61696e-07
CL352.Contig10_All	0	0.313	5.33242	2.86653e-06	3.61089e-06
CL352.Contig4_All	0.093	0.493	2.41606	4.9013e-06	6.29552e-06
CL3521.Contig1_All	1.326	4.59	1.78584	5.17554e-145	6.6607e-146	HMG	K15542//polyadenylation factor subunit 2+ko03015//mRNA surveillance pathway;K15542//polyadenylation factor subunit 2+ko03015//mRNA surveillance pathway;K15542//polyadenylation factor subunit 2+ko03015//mRNA surveillance pathway;K15542//polyadenylation factor subunit 2+ko03015//mRNA surveillance pathway;K15542//polyadenylation factor subunit 2+ko03015//mRNA surveillance pathway		PREDICTED: pre-mRNA 3' end processing protein WDR33 isoform X1 [Cimex lectularius] >XP_014250030.1 PREDICTED: pre-mRNA 3' end processing protein WDR33 isoform X1 [Cimex lectularius]	WD domain, G-beta repeat	[A] KOG0284 Polyadenylation factor I complex, subunit PFS2	pre-mRNA 3' end processing protein WDR33 OS=Homo sapiens GN=WDR33 PE=1 SV=2
CL3525.Contig4_All	0	0.113	4.46899	0.000532267	0.000828892
CL3529.Contig1_All	1.06	5.943	2.50261	1.7356e-72	4.22392e-73					Zn-finger in Ran binding protein and others
CL3535.Contig3_All	3.18	10.726	1.75359	2.67749e-234	2.09834e-235			CU062407.13 Pig DNA sequence from clone CH242-82N3 on chromosome 14, complete sequence	PREDICTED: glucose-induced degradation protein 8 homolog [Bemisia tabaci]	CTLH/CRA C-terminal to LisH motif domain	[Z] KOG2659 LisH motif-containing protein	Glucose-induced degradation protein 8 homolog OS=Gallus gallus GN=GID8 PE=2 SV=1
CL354.Contig1_All	0.04	0.293	2.88989	0.000140021	0.000204659		K10373//tropomyosin 1+ko05414//Dilated cardiomyopathy (DCM)+ko05410//Hypertrophic cardiomyopathy (HCM)+ko04261//Adrenergic signaling in cardiomyocytes+ko04260//Cardiac muscle contraction+ko05206//MicroRNAs in cancer;K10373//tropomyosin 1+ko05414//Dilated cardiomyopathy (DCM)+ko05410//Hypertrophic cardiomyopathy (HCM)+ko04261//Adrenergic signaling in cardiomyocytes+ko04260//Cardiac muscle contract…	XM_016989690.1 PREDICTED: Nasonia vitripennis tropomyosin 1 (Tm1), transcript variant X13, mRNA	PREDICTED: tropomyosin isoform X12 [Diuraphis noxia]		[Z] KOG1003 Actin filament-coating protein tropomyosin	Tropomyosin OS=Homarus americanus GN=TM1 PE=1 SV=1
CL3545.Contig2_All	0.103	0.776	2.91458	0.000323514	0.00049139
CL355.Contig2_All	0.37	1.04	1.47883	1.65367e-18	1.1378e-18
CL355.Contig7_All	0	0.12	5.73811	7.91358e-08	8.88731e-08					Wound-inducible basic protein family
CL3554.Contig2_All	5.013	16.213	1.69735	0	0	MYB	K22016//mucin-3/17;K10955//mucin-2+ko05226//Gastric cancer+ko05146//Amoebiasis;K22017//mucin-4;K21125//mucin-5AC+ko04657//IL-17 signaling pathway;K21125//mucin-5AC+ko04657//IL-17 signaling pathway	XM_013478510.1 Eimeria maxima hypothetical protein, conserved partial mRNA	proteophosphoglycan ppg4 [Leishmania braziliensis MHOM/BR/75/M2904] >CAM43271.1 proteophosphoglycan ppg4 [Leishmania braziliensis MHOM/BR/75/M2904]	UBA/TS-N domain	[K] KOG1878 Nuclear receptor coregulator SMRT/SMRTER, contains Myb-like domains	Probable serine/threonine-protein kinase fhkB OS=Dictyostelium discoideum GN=fhkB PE=3 SV=1	GO:0010468//regulation of gene expression;GO:0003682//chromatin binding;GO:0016021//integral component of membrane
CL3554.Contig3_All	24.303	59.65	1.29384	0	0	MYB	K22016//mucin-3/17;K21125//mucin-5AC+ko04657//IL-17 signaling pathway;K10955//mucin-2+ko05226//Gastric cancer+ko05146//Amoebiasis;K21125//mucin-5AC+ko04657//IL-17 signaling pathway;K21125//mucin-5AC+ko04657//IL-17 signaling pathway	XM_013478510.1 Eimeria maxima hypothetical protein, conserved partial mRNA	proteophosphoglycan ppg4 [Leishmania braziliensis MHOM/BR/75/M2904] >CAM43271.1 proteophosphoglycan ppg4 [Leishmania braziliensis MHOM/BR/75/M2904]	UBA/TS-N domain	[K] KOG1878 Nuclear receptor coregulator SMRT/SMRTER, contains Myb-like domains	Probable serine/threonine-protein kinase fhkB OS=Dictyostelium discoideum GN=fhkB PE=3 SV=1	GO:0010468//regulation of gene expression;GO:0003682//chromatin binding;GO:0016021//integral component of membrane
CL3555.Contig1_All	1.266	4.063	1.67351	7.26366e-163	8.2032e-164
CL3556.Contig2_All	1.536	3.12	1.02494	4.67658e-76	1.10052e-76		K00653//chromodomain protein Y [EC:2.3.1.48];K00653//chromodomain protein Y [EC:2.3.1.48];K00653//chromodomain protein Y [EC:2.3.1.48];K00653//chromodomain protein Y [EC:2.3.1.48];K00653//chromodomain protein Y [EC:2.3.1.48]	LL884151.1 Schistosoma margrebowiei genome assembly S_margrebowiei_Zambia ,scaffold SMRZ_contig0003850	uncharacterized protein LOC111046606 [Nilaparvata lugens] >XP_022187881.1 uncharacterized protein LOC111046606 [Nilaparvata lugens]	Enoyl-CoA hydratase/isomerase	[I] KOG0016 Enoyl-CoA hydratase/isomerase	Chromodomain Y-like protein 2 OS=Mus musculus GN=Cdyl2 PE=1 SV=1	GO:0008152//metabolic process;GO:0003824//catalytic activity
CL3557.Contig2_All	5.01	14.773	1.56343	5.97662e-267	4.20962e-268		K11426//SET and MYND domain-containing protein;K11426//SET and MYND domain-containing protein;K11426//SET and MYND domain-containing protein;K11426//SET and MYND domain-containing protein		PREDICTED: SET and MYND domain-containing protein 4-like [Bemisia tabaci]	SET domain	[B] KOG2084 Predicted histone tail methylase containing SET domain	SET and MYND domain-containing protein 4 OS=Mus musculus GN=Smyd4 PE=2 SV=2
CL3558.Contig1_All	7.496	21.786	1.53129	0	0		K21108//blood vessel epicardial substance+ko04530//Tight junction;K12182//hepatocyte growth factor-regulated tyrosine kinase substrate+ko04144//Endocytosis+ko04145//Phagosome;K18643//katanin p80 WD40 repeat-containing subunit B1		WD repeat and FYVE domain-containing protein 2 [Zootermopsis nevadensis] >KDR10967.1 WD repeat and FYVE domain-containing protein 2 [Zootermopsis nevadensis]	WD domain, G-beta repeat	[S] KOG1409 Uncharacterized conserved protein, contains WD40 repeats and FYVE domains	WD repeat and FYVE domain-containing protein 1 OS=Bos taurus GN=WDFY1 PE=2 SV=1
CL356.Contig11_All	0.51	7.3	3.85158	0	0		K22237//Rab effector MyRIP		PREDICTED: uncharacterized protein LOC109041967 isoform X2 [Bemisia tabaci]		[S] KOG1181 FOG: Low-complexity
CL356.Contig12_All	0	0.34	5.52954	5.5967e-07	6.6686e-07
CL356.Contig4_All	0.053	1.163	4.4414	1.03891e-78	2.36917e-79		K22237//Rab effector MyRIP		uncharacterized protein LOC111027877 isoform X2 [Myzus persicae]		[S] KOG1181 FOG: Low-complexity		GO:0016021//integral component of membrane
CL356.Contig8_All	0.296	4.873	4.04066	2.39837e-263	1.69972e-264		K22237//Rab effector MyRIP		PREDICTED: uncharacterized protein LOC109041967 isoform X4 [Bemisia tabaci]	Leucine zipper
CL358.Contig3_All	0.466	1.8	1.94978	7.81073e-40	3.13363e-40	Others	K03120//transcription initiation factor TFIID TATA-box-binding protein+ko03022//Basal transcription factors+ko05203//Viral carcinogenesis+ko05016//Huntington disease+ko05165//Human papillomavirus infection+ko05166//Human T-cell leukemia virus 1 infection+ko05168//Herpes simplex infection;K03120//transcription initiation factor TFIID TATA-box-binding protein+ko03022//Basal transcription factors+ko…		PREDICTED: TATA box-binding protein-like protein 2 [Peromyscus maniculatus bairdii]	Transcription factor TFIID (or TATA-binding protein, TBP)	[K] KOG3302 TATA-box binding protein (TBP), component of TFIID and TFIIIB	TATA-box-binding protein OS=Drosophila melanogaster GN=Tbp PE=1 SV=1	GO:0045892//negative regulation of transcription, DNA-templated;GO:0003677//DNA binding;GO:0005634//nucleus;GO:0007275//multicellular organism development;GO:0003700//DNA binding transcription factor activity;GO:0005737//cytoplasm;GO:0006352//DNA-templated transcription, initiation
CL359.Contig20_All	0.14	3.31	4.56032	2.40174e-172	2.57143e-173					Eukaryotic translation initiation factor 3 subunit 8 N-terminus
CL359.Contig25_All	0.09	0.316	1.79247	7.49276e-08	8.40086e-08					Golgi-body localisation protein domain
CL359.Contig26_All	12.88	32.67	1.35023	0	0
CL359.Contig2_All	0	2.25	10.1402	1.28602e-90	2.56645e-91					Protein of unknown function (DUF3606)
CL359.Contig32_All	0.443	1.056	1.26423	4.93761e-15	3.88461e-15
CL3604.Contig2_All	0.083	1.583	4.2773	9.15633e-06	1.20306e-05
CL361.Contig1_All	0.57	7.973	3.80336	7.07738e-189	6.96199e-190	zf-C2H2	K09228//KRAB domain-containing zinc finger protein;K09228//KRAB domain-containing zinc finger protein;K09228//KRAB domain-containing zinc finger protein;K09228//KRAB domain-containing zinc finger protein		PREDICTED: zinc finger protein 721-like [Sinocyclocheilus grahami]	Zinc finger, C2H2 type	[R] KOG1721 FOG: Zn-finger	Zinc finger protein 99 OS=Homo sapiens GN=ZNF99 PE=2 SV=3
CL3611.Contig1_All	3.33	15.29	2.19672	0	0		K04707//E3 ubiquitin-protein ligase CBL [EC:2.3.2.27]+ko04144//Endocytosis+ko04910//Insulin signaling pathway+ko05100//Bacterial invasion of epithelial cells+ko04120//Ubiquitin mediated proteolysis+ko05200//Pathways in cancer+ko05205//Proteoglycans in cancer+ko04012//ErbB signaling pathway+ko05220//Chronic myeloid leukemia;K04707//E3 ubiquitin-protein ligase CBL [EC:2.3.2.27]+ko04144//Endocytosis…	XM_018032697.1 PREDICTED: Ceratina calcarata E3 ubiquitin-protein ligase CBL (LOC108629821), mRNA	PREDICTED: E3 ubiquitin-protein ligase CBL-B isoform X1 [Halyomorpha halys]	CBL proto-oncogene N-terminal domain 1	[V] KOG1785 Tyrosine kinase negative regulator CBL	E3 ubiquitin-protein ligase CBL OS=Homo sapiens GN=CBL PE=1 SV=2	GO:0005634//nucleus;GO:0007166//cell surface receptor signaling pathway;GO:0023051//regulation of signaling;GO:0004842//ubiquitin-protein transferase activity;GO:0016874//ligase activity;GO:0001784//phosphotyrosine residue binding;GO:0005509//calcium ion binding;GO:0004871//signal transducer activity
CL3612.Contig1_All	2.14	12.303	2.54024	6.76828e-72	1.66044e-72
CL3618.Contig1_All	0.48	1.223	1.38208	2.3806e-05	3.22959e-05		K10696//E3 ubiquitin-protein ligase BRE1 [EC:2.3.2.27]		PREDICTED: FGGY carbohydrate kinase domain-containing protein-like [Bemisia tabaci] >XP_018901395.1 PREDICTED: FGGY carbohydrate kinase domain-containing protein-like [Bemisia tabaci]	FGGY family of carbohydrate kinases, C-terminal domain	[G] KOG2517 Ribulose kinase and related carbohydrate kinases	FGGY carbohydrate kinase domain-containing protein OS=Xenopus laevis GN=fggy PE=2 SV=2	GO:0016301//kinase activity;GO:0005975//carbohydrate metabolic process;GO:0016773//phosphotransferase activity, alcohol group as acceptor
CL362.Contig3_All	0.893	2.99	1.75178	5.1112e-32	2.42004e-32		K01365//cathepsin L [EC:3.4.22.15]+ko04145//Phagosome+ko04140//Autophagy - animal+ko04142//Lysosome+ko04210//Apoptosis+ko05418//Fluid shear stress and atherosclerosis+ko04612//Antigen processing and presentation+ko05323//Rheumatoid arthritis+ko05205//Proteoglycans in cancer;K01365//cathepsin L [EC:3.4.22.15]+ko04145//Phagosome+ko04140//Autophagy - animal+ko04142//Lysosome+ko04210//Apoptosis+ko054…		PREDICTED: cathepsin L1-like [Bemisia tabaci]	Papain family cysteine protease	[O] KOG1543 Cysteine proteinase Cathepsin L	Cathepsin L1 OS=Bos taurus GN=CTSL PE=1 SV=3	GO:0008234//cysteine-type peptidase activity
CL3629.Contig2_All	1.036	2.166	1.04954	6.84844e-34	3.10488e-34	zf-C2H2	K16685//protein KIBRA+ko04391//Hippo signaling pathway - fly+ko04390//Hippo signaling pathway+ko04392//Hippo signaling pathway - multiple species;K16685//protein KIBRA+ko04391//Hippo signaling pathway - fly+ko04390//Hippo signaling pathway+ko04392//Hippo signaling pathway - multiple species;K16685//protein KIBRA+ko04391//Hippo signaling pathway - fly+ko04390//Hippo signaling pathway+ko04392//Hipp…	XM_016280599.1 PREDICTED: Sinocyclocheilus grahami calsequestrin-1-like (LOC107591453), mRNA	PREDICTED: protein kibra [Bemisia tabaci]	WW domain	[S] LSE0402 A Uncharacterized protein	Protein kibra OS=Drosophila virilis GN=Kibra PE=3 SV=1
CL3631.Contig2_All	0	1.243	7.88486	2.86108e-26	1.55432e-26
CL3631.Contig8_All	0.343	1.303	1.94669	5.35722e-18	3.75414e-18
CL3640.Contig1_All	0.106	0.876	3.04273	7.59608e-06	9.90711e-06
CL3640.Contig2_All	1.126	2.27	1.00437	2.24793e-09	2.29778e-09
CL3650.Contig1_All	0	2.593	7.75279	2.18184e-24	1.24673e-24		K16810//TBCC domain-containing protein 1	XM_002663355.4 PREDICTED: Danio rerio crystallin, gamma M2d19 (crygm2d19), mRNA	uncharacterized protein LOC561929 [Danio rerio] >XP_002663401.1 gamma-crystallin M2 [Danio rerio] >XP_021334574.1 gamma-crystallin M2 [Danio rerio] >AAI46705.1 Zgc:165347 protein [Danio rerio]	Beta/Gamma crystallin		Gamma-crystallin M2 OS=Cyprinus carpio PE=2 SV=1
CL3650.Contig2_All	0	2.683	7.879	3.48943e-26	1.90136e-26		K16810//TBCC domain-containing protein 1	NM_001002581.1 Danio rerio crystallin, gamma M2d8 (crygm2d8), mRNA >BC076209.1 Danio rerio crystallin, gamma M2d8, mRNA (cDNA clone MGC:92729 IMAGE:7075921), complete cds	crystallin, gamma M2d6 [Danio rerio] >AAH71422.1 Crystallin, gamma M2d6 [Danio rerio] >ABB99961.1 crystallin gamma EM2-6 [Danio rerio]	Beta/Gamma crystallin		Gamma-crystallin M2 OS=Cyprinus carpio PE=2 SV=1
CL3651.Contig1_All	0.396	1.04	1.37552	1.48296e-06	1.82404e-06				PREDICTED: piggyBac transposable element-derived protein 4-like [Acyrthosiphon pisum]	Transposase IS4
CL3653.Contig1_All	1.623	191.846	6.89064	0	0		K15102//solute carrier family 25 (mitochondrial phosphate transporter), member 3;K15102//solute carrier family 25 (mitochondrial phosphate transporter), member 3;K15102//solute carrier family 25 (mitochondrial phosphate transporter), member 3;K15102//solute carrier family 25 (mitochondrial phosphate transporter), member 3;K15102//solute carrier family 25 (mitochondrial phosphate transporter), mem…	LC185259.1 Planococcus kraunhiae PiC mRNA for phosphate carrier 2, complete cds	phosphate carrier 2 [Planococcus kraunhiae]	Mitochondrial carrier protein	[C] KOG0767 Mitochondrial phosphate carrier protein	Phosphate carrier protein, mitochondrial OS=Bos taurus GN=SLC25A3 PE=1 SV=1
CL3659.Contig2_All	0.076	11.966	7.23529	0	0	zf-C2H2	K09228//KRAB domain-containing zinc finger protein;K09228//KRAB domain-containing zinc finger protein;K09228//KRAB domain-containing zinc finger protein;K09228//KRAB domain-containing zinc finger protein;K09228//KRAB domain-containing zinc finger protein		zinc finger protein 271-like [Parasteatoda tepidariorum]	C2H2-type zinc finger	[R] KOG1721 FOG: Zn-finger	Zinc finger protein 573 OS=Homo sapiens GN=ZNF573 PE=2 SV=4
CL3659.Contig4_All	0	4.05	10.7594	8.2411e-126	1.20302e-126	zf-C2H2	K09228//KRAB domain-containing zinc finger protein;K09228//KRAB domain-containing zinc finger protein;K09228//KRAB domain-containing zinc finger protein;K09228//KRAB domain-containing zinc finger protein;K09228//KRAB domain-containing zinc finger protein		zinc finger protein 271-like [Parasteatoda tepidariorum]	C2H2-type zinc finger	[R] KOG1721 FOG: Zn-finger	Zinc finger protein 573 OS=Homo sapiens GN=ZNF573 PE=2 SV=4
CL366.Contig1_All	1.273	2.583	1.04774	0.000633164	0.000995298
CL3660.Contig1_All	1.576	11.466	2.85959	0	0				FAST kinase domain-containing protein 5, mitochondrial isoform X2 [Myzus persicae]	FAST kinase-like protein, subdomain 2		FAST kinase domain-containing protein 5, mitochondrial OS=Mus musculus GN=Fastkd5 PE=2 SV=1
[truncated: 1,195 more rows]

## Sheet: DOWN
Gene ID	MF6 FPKM	TF6 FPKM	log2(TF6/MF6)	Qvalue(MF6-vs-TF6)	Pvalue(MF6-vs-TF6)	TFs	Kegg Orthology	Nt	Nr	Pfam	Kog	Swissprot	GO
[truncated: 2,394 more rows]
