# Supplementary material for: De Novo Transcription Responses Describe Host-Related Differentiation of Paracoccus marginatus (Hemiptera: Pseudococcidae)
Source: Insects. 2022 Sep 19;13(9):850. doi: 10.3390/insects13090850 (PMC9502998; doi:10.3390/insects13090850)
Supplement: Supplementary file 1 [file insects-13-00850-s001.zip › Table S4. KEGG_classification.xlsx]

## Sheet: 6.5.2_KEGG Pathway富集_MF6-vs-TF6
Pathway ID	Pathway Name	Level 1	Level 2	Term Candidate Gene Num	Total Candidate Gene Num	Term Gene Num	Total Gene Num	Rich Ratio	P value	Q value
ko04711	Circadian rhythm - fly	Organismal Systems	Environmental adaptation	21	1718	40	11182	0.525	5.00522e-08	9.16991e-06
ko04745	Phototransduction - fly	Organismal Systems	Sensory system	41	1718	126	11182	0.325397	1.03283e-06	0.00011189
ko04710	Circadian rhythm	Organismal Systems	Environmental adaptation	25	1718	63	11182	0.396825	2.47901e-06	0.000201419
ko03010	Ribosome	Genetic Information Processing	Translation	70	1718	293	11182	0.238908	7.20729e-05	0.00468474
ko04610	Complement and coagulation cascades	Organismal Systems	Immune system	17	1718	44	11182	0.386364	0.000147725	0.00800179
ko03320	PPAR signaling pathway	Organismal Systems	Endocrine system	46	1718	186	11182	0.247312	0.000535887	0.0217704
ko04612	Antigen processing and presentation	Organismal Systems	Immune system	33	1718	123	11182	0.268293	0.000708826	0.0255965
ko04140	Autophagy - animal	Cellular Processes	Transport and catabolism	65	1718	299	11182	0.217391	0.00188784	0.0486582
ko04136	Autophagy - other	Cellular Processes	Transport and catabolism	26	1718	99	11182	0.262626	0.0034226	0.0741564
ko04217	Necroptosis	Cellular Processes	Cell growth and death	33	1718	140	11182	0.235714	0.00675534	0.129146
ko04260	Cardiac muscle contraction	Organismal Systems	Circulatory system	30	1718	124	11182	0.241935	0.0064689	0.129146
ko04142	Lysosome	Cellular Processes	Transport and catabolism	74	1718	371	11182	0.199461	0.00941049	0.157783
ko04974	Protein digestion and absorption	Organismal Systems	Digestive system	48	1718	225	11182	0.213333	0.00989124	0.157783
ko00981	Insect hormone biosynthesis	Metabolism	Metabolism of terpenoids and polyketides	26	1718	108	11182	0.240741	0.0114526	0.169186
ko04728	Dopaminergic synapse	Organismal Systems	Nervous system	36	1718	165	11182	0.218182	0.0166354	0.22527
ko04151	PI3K-Akt signaling pathway	Environmental Information Processing	Signal transduction	71	1718	366	11182	0.193989	0.0199548	0.249435
ko04975	Fat digestion and absorption	Organismal Systems	Digestive system	49	1718	244	11182	0.20082	0.027011	0.325132
ko00630	Glyoxylate and dicarboxylate metabolism	Metabolism	Carbohydrate metabolism	15	1718	59	11182	0.254237	0.0302589	0.351219
ko00071	Fatty acid degradation	Metabolism	Lipid metabolism	21	1718	91	11182	0.230769	0.0333937	0.370611
ko00410	beta-Alanine metabolism	Metabolism	Metabolism of other amino acids	16	1718	65	11182	0.246154	0.0342102	0.370611
ko00592	alpha-Linolenic acid metabolism	Metabolism	Lipid metabolism	11	1718	41	11182	0.268293	0.0411111	0.417535
ko00670	One carbon pool by folate	Metabolism	Metabolism of cofactors and vitamins	9	1718	32	11182	0.28125	0.0469301	0.43578
ko04380	Osteoclast differentiation	Organismal Systems	Development	18	1718	78	11182	0.230769	0.0464347	0.43578
ko04137	Mitophagy - animal	Cellular Processes	Transport and catabolism	23	1718	107	11182	0.214953	0.0558258	0.490362
ko04145	Phagosome	Cellular Processes	Transport and catabolism	46	1718	238	11182	0.193277	0.0554101	0.490362
ko04512	ECM-receptor interaction	Environmental Information Processing	Signaling molecules and interaction	30	1718	148	11182	0.202703	0.064151	0.534592
ko04620	Toll-like receptor signaling pathway	Organismal Systems	Immune system	17	1718	77	11182	0.220779	0.0739999	0.559301
ko04714	Thermogenesis	Organismal Systems	Environmental adaptation	66	1718	362	11182	0.18232	0.073829	0.559301
ko00640	Propanoate metabolism	Metabolism	Carbohydrate metabolism	12	1718	52	11182	0.230769	0.0924376	0.631113
ko04520	Adherens junction	Cellular Processes	Cellular community - eukaryotes	48	1718	259	11182	0.185328	0.0917272	0.631113
ko04979	Cholesterol metabolism	Organismal Systems	Digestive system	32	1718	165	11182	0.193939	0.0932105	0.631113
ko00140	Steroid hormone biosynthesis	Metabolism	Lipid metabolism	36	1718	190	11182	0.189474	0.102431	0.657852
ko00190	Oxidative phosphorylation	Metabolism	Energy metabolism	31	1718	161	11182	0.192547	0.104495	0.657852
ko04510	Focal adhesion	Cellular Processes	Cellular community - eukaryotes	60	1718	334	11182	0.179641	0.105256	0.657852
ko00300	Lysine biosynthesis	Metabolism	Amino acid metabolism	3	1718	8	11182	0.375	0.111328	0.670032
ko04659	Th17 cell differentiation	Organismal Systems	Immune system	15	1718	70	11182	0.214286	0.109425	0.670032
ko00531	Glycosaminoglycan degradation	Metabolism	Glycan biosynthesis and metabolism	13	1718	60	11182	0.216667	0.121607	0.693374
ko04925	Aldosterone synthesis and secretion	Organismal Systems	Endocrine system	28	1718	147	11182	0.190476	0.130061	0.728789
ko04922	Glucagon signaling pathway	Organismal Systems	Endocrine system	35	1718	189	11182	0.185185	0.134117	0.732521
ko04910	Insulin signaling pathway	Organismal Systems	Endocrine system	53	1718	298	11182	0.177852	0.137705	0.733674
ko00561	Glycerolipid metabolism	Metabolism	Lipid metabolism	52	1718	295	11182	0.176271	0.156067	0.80511
ko04211	Longevity regulating pathway	Organismal Systems	Aging	24	1718	128	11182	0.1875	0.171298	0.843515
ko04150	mTOR signaling pathway	Environmental Information Processing	Signal transduction	41	1718	231	11182	0.177489	0.17697	0.858438
ko04810	Regulation of actin cytoskeleton	Cellular Processes	Cell motility	46	1718	263	11182	0.174905	0.187864	0.894901
ko04210	Apoptosis	Cellular Processes	Cell growth and death	37	1718	211	11182	0.175355	0.213293	0.94959
ko00260	Glycine, serine and threonine metabolism	Metabolism	Amino acid metabolism	22	1718	122	11182	0.180328	0.238706	0.986791
ko00480	Glutathione metabolism	Metabolism	Metabolism of other amino acids	28	1718	160	11182	0.175	0.255047	0.986791
ko00564	Glycerophospholipid metabolism	Metabolism	Lipid metabolism	57	1718	338	11182	0.168639	0.239343	0.986791
ko01212	Fatty acid metabolism	Metabolism	Global and overview maps	40	1718	234	11182	0.17094	0.25407	0.986791
ko03018	RNA degradation	Genetic Information Processing	Folding, sorting and degradation	29	1718	166	11182	0.174699	0.253466	0.986791
ko04068	FoxO signaling pathway	Environmental Information Processing	Signal transduction	39	1718	227	11182	0.171806	0.246648	0.986791
ko04146	Peroxisome	Cellular Processes	Transport and catabolism	35	1718	200	11182	0.175	0.224767	0.986791
ko04310	Wnt signaling pathway	Environmental Information Processing	Signal transduction	45	1718	265	11182	0.169811	0.253513	0.986791
ko04350	TGF-beta signaling pathway	Environmental Information Processing	Signal transduction	24	1718	134	11182	0.179104	0.237089	0.986791
ko04621	NOD-like receptor signaling pathway	Organismal Systems	Immune system	30	1718	172	11182	0.174419	0.251875	0.986791
ko04921	Oxytocin signaling pathway	Organismal Systems	Endocrine system	33	1718	190	11182	0.173684	0.247073	0.986791
ko04010	MAPK signaling pathway	Environmental Information Processing	Signal transduction	49	1718	291	11182	0.168385	0.262597	0.992372
ko00010	Glycolysis / Gluconeogenesis	Metabolism	Carbohydrate metabolism	18	1718	101	11182	0.178218	0.283924	0.99999
ko00020	Citrate cycle (TCA cycle)	Metabolism	Carbohydrate metabolism	11	1718	68	11182	0.161765	0.477428	0.99999
ko00030	Pentose phosphate pathway	Metabolism	Carbohydrate metabolism	9	1718	70	11182	0.128571	0.768091	0.99999
ko00040	Pentose and glucuronate interconversions	Metabolism	Carbohydrate metabolism	23	1718	150	11182	0.153333	0.539405	0.99999
ko00051	Fructose and mannose metabolism	Metabolism	Carbohydrate metabolism	12	1718	77	11182	0.155844	0.527244	0.99999
ko00052	Galactose metabolism	Metabolism	Carbohydrate metabolism	26	1718	156	11182	0.166667	0.357721	0.99999
ko00053	Ascorbate and aldarate metabolism	Metabolism	Carbohydrate metabolism	22	1718	141	11182	0.156028	0.504679	0.99999
ko00061	Fatty acid biosynthesis	Metabolism	Lipid metabolism	12	1718	79	11182	0.151899	0.565344	0.99999
ko00062	Fatty acid elongation	Metabolism	Lipid metabolism	6	1718	65	11182	0.0923077	0.947591	0.99999
ko00072	Synthesis and degradation of ketone bodies	Metabolism	Lipid metabolism	3	1718	19	11182	0.157895	0.57634	0.99999
ko00073	Cutin, suberine and wax biosynthesis	Metabolism	Lipid metabolism	6	1718	47	11182	0.12766	0.74932	0.99999
ko00100	Steroid biosynthesis	Metabolism	Lipid metabolism	19	1718	109	11182	0.174312	0.311596	0.99999
ko00130	Ubiquinone and other terpenoid-quinone biosynthesis	Metabolism	Metabolism of cofactors and vitamins	3	1718	36	11182	0.0833333	0.930534	0.99999
ko00230	Purine metabolism	Metabolism	Nucleotide metabolism	21	1718	161	11182	0.130435	0.823772	0.99999
ko00240	Pyrimidine metabolism	Metabolism	Nucleotide metabolism	10	1718	93	11182	0.107527	0.922292	0.99999
ko00250	Alanine, aspartate and glutamate metabolism	Metabolism	Amino acid metabolism	2	1718	43	11182	0.0465116	0.993317	0.99999
ko00270	Cysteine and methionine metabolism	Metabolism	Amino acid metabolism	16	1718	111	11182	0.144144	0.650047	0.99999
ko00280	Valine, leucine and isoleucine degradation	Metabolism	Amino acid metabolism	16	1718	103	11182	0.15534	0.523083	0.99999
ko00310	Lysine degradation	Metabolism	Amino acid metabolism	26	1718	206	11182	0.126214	0.886981	0.99999
ko00330	Arginine and proline metabolism	Metabolism	Amino acid metabolism	13	1718	79	11182	0.164557	0.440859	0.99999
ko00340	Histidine metabolism	Metabolism	Amino acid metabolism	2	1718	19	11182	0.105263	0.813253	0.99999
ko00350	Tyrosine metabolism	Metabolism	Amino acid metabolism	10	1718	55	11182	0.181818	0.333816	0.99999
ko00360	Phenylalanine metabolism	Metabolism	Amino acid metabolism	5	1718	40	11182	0.125	0.75714	0.99999
ko00380	Tryptophan metabolism	Metabolism	Amino acid metabolism	9	1718	57	11182	0.157895	0.520788	0.99999
ko00430	Taurine and hypotaurine metabolism	Metabolism	Metabolism of other amino acids	2	1718	21	11182	0.0952381	0.855375	0.99999
ko00440	Phosphonate and phosphinate metabolism	Metabolism	Metabolism of other amino acids	2	1718	8	11182	0.25	0.354349	0.99999
ko00450	Selenocompound metabolism	Metabolism	Metabolism of other amino acids	2	1718	35	11182	0.0571429	0.978715	0.99999
ko00500	Starch and sucrose metabolism	Metabolism	Carbohydrate metabolism	19	1718	123	11182	0.154472	0.528511	0.99999
ko00510	N-Glycan biosynthesis	Metabolism	Glycan biosynthesis and metabolism	10	1718	80	11182	0.125	0.805157	0.99999
ko00511	Other glycan degradation	Metabolism	Glycan biosynthesis and metabolism	18	1718	103	11182	0.174757	0.314155	0.99999
ko00512	Mucin type O-glycan biosynthesis	Metabolism	Glycan biosynthesis and metabolism	4	1718	24	11182	0.166667	0.515353	0.99999
ko00514	Other types of O-glycan biosynthesis	Metabolism	Glycan biosynthesis and metabolism	3	1718	47	11182	0.0638298	0.982394	0.99999
ko00515	Mannose type O-glycan biosynthesis	Metabolism	Glycan biosynthesis and metabolism	1	1718	25	11182	0.04	0.984627	0.99999
ko00520	Amino sugar and nucleotide sugar metabolism	Metabolism	Carbohydrate metabolism	18	1718	148	11182	0.121622	0.88805	0.99999
ko00524	Neomycin, kanamycin and gentamicin biosynthesis	Metabolism	Biosynthesis of other secondary metabolites	2	1718	8	11182	0.25	0.354349	0.99999
ko00532	Glycosaminoglycan biosynthesis - chondroitin sulfate / dermatan sulfate	Metabolism	Glycan biosynthesis and metabolism	1	1718	25	11182	0.04	0.984627	0.99999
ko00534	Glycosaminoglycan biosynthesis - heparan sulfate / heparin	Metabolism	Glycan biosynthesis and metabolism	5	1718	40	11182	0.125	0.75714	0.99999
ko00562	Inositol phosphate metabolism	Metabolism	Carbohydrate metabolism	20	1718	123	11182	0.162602	0.428906	0.99999
ko00563	Glycosylphosphatidylinositol (GPI)-anchor biosynthesis	Metabolism	Glycan biosynthesis and metabolism	4	1718	35	11182	0.114286	0.807802	0.99999
ko00565	Ether lipid metabolism	Metabolism	Lipid metabolism	7	1718	68	11182	0.102941	0.914803	0.99999
ko00590	Arachidonic acid metabolism	Metabolism	Lipid metabolism	13	1718	71	11182	0.183099	0.290324	0.99999
ko00591	Linoleic acid metabolism	Metabolism	Lipid metabolism	3	1718	26	11182	0.115385	0.785513	0.99999
ko00600	Sphingolipid metabolism	Metabolism	Lipid metabolism	11	1718	92	11182	0.119565	0.855691	0.99999
ko00601	Glycosphingolipid biosynthesis - lacto and neolacto series	Metabolism	Glycan biosynthesis and metabolism	1	1718	20	11182	0.05	0.964538	0.99999
ko00620	Pyruvate metabolism	Metabolism	Carbohydrate metabolism	14	1718	88	11182	0.159091	0.488811	0.99999
ko00650	Butanoate metabolism	Metabolism	Carbohydrate metabolism	3	1718	37	11182	0.0810811	0.938388	0.99999
ko00730	Thiamine metabolism	Metabolism	Metabolism of cofactors and vitamins	4	1718	27	11182	0.148148	0.613319	0.99999
ko00740	Riboflavin metabolism	Metabolism	Metabolism of cofactors and vitamins	2	1718	15	11182	0.133333	0.695249	0.99999
ko00750	Vitamin B6 metabolism	Metabolism	Metabolism of cofactors and vitamins	1	1718	9	11182	0.111111	0.777288	0.99999
ko00760	Nicotinate and nicotinamide metabolism	Metabolism	Metabolism of cofactors and vitamins	3	1718	33	11182	0.0909091	0.901134	0.99999
ko00770	Pantothenate and CoA biosynthesis	Metabolism	Metabolism of cofactors and vitamins	4	1718	30	11182	0.133333	0.697982	0.99999
ko00780	Biotin metabolism	Metabolism	Metabolism of cofactors and vitamins	1	1718	13	11182	0.0769231	0.8858	0.99999
ko00790	Folate biosynthesis	Metabolism	Metabolism of cofactors and vitamins	9	1718	76	11182	0.118421	0.845415	0.99999
ko00830	Retinol metabolism	Metabolism	Metabolism of cofactors and vitamins	23	1718	138	11182	0.166667	0.369838	0.99999
ko00860	Porphyrin and chlorophyll metabolism	Metabolism	Metabolism of cofactors and vitamins	23	1718	142	11182	0.161972	0.426363	0.99999
ko00900	Terpenoid backbone biosynthesis	Metabolism	Metabolism of terpenoids and polyketides	10	1718	67	11182	0.149254	0.591961	0.99999
ko00910	Nitrogen metabolism	Metabolism	Energy metabolism	3	1718	41	11182	0.0731707	0.962267	0.99999
ko00920	Sulfur metabolism	Metabolism	Energy metabolism	4	1718	23	11182	0.173913	0.480211	0.99999
ko00970	Aminoacyl-tRNA biosynthesis	Genetic Information Processing	Translation	1	1718	69	11182	0.0144928	0.99999	0.99999
ko00980	Metabolism of xenobiotics by cytochrome P450	Metabolism	Xenobiotics biodegradation and metabolism	21	1718	148	11182	0.141892	0.689422	0.99999
ko00982	Drug metabolism - cytochrome P450	Metabolism	Xenobiotics biodegradation and metabolism	26	1718	155	11182	0.167742	0.344754	0.99999
ko00983	Drug metabolism - other enzymes	Metabolism	Xenobiotics biodegradation and metabolism	61	1718	387	11182	0.157623	0.434687	0.99999
ko01040	Biosynthesis of unsaturated fatty acids	Metabolism	Lipid metabolism	19	1718	109	11182	0.174312	0.311596	0.99999
ko01200	Carbon metabolism	Metabolism	Global and overview maps	37	1718	222	11182	0.166667	0.320553	0.99999
ko01210	2-Oxocarboxylic acid metabolism	Metabolism	Global and overview maps	6	1718	40	11182	0.15	0.592837	0.99999
ko01230	Biosynthesis of amino acids	Metabolism	Global and overview maps	19	1718	149	11182	0.127517	0.842742	0.99999
ko02010	ABC transporters	Environmental Information Processing	Membrane transport	9	1718	116	11182	0.0775862	0.995426	0.99999
ko03008	Ribosome biogenesis in eukaryotes	Genetic Information Processing	Translation	19	1718	179	11182	0.106145	0.974577	0.99999
ko03013	RNA transport	Genetic Information Processing	Translation	71	1718	449	11182	0.158129	0.414482	0.99999
ko03015	mRNA surveillance pathway	Genetic Information Processing	Translation	48	1718	313	11182	0.153355	0.530451	0.99999
ko03020	RNA polymerase	Genetic Information Processing	Transcription	7	1718	99	11182	0.0707071	0.996122	0.99999
ko03022	Basal transcription factors	Genetic Information Processing	Transcription	6	1718	66	11182	0.0909091	0.952461	0.99999
ko03030	DNA replication	Genetic Information Processing	Replication and repair	12	1718	95	11182	0.126316	0.810023	0.99999
ko03040	Spliceosome	Genetic Information Processing	Transcription	66	1718	407	11182	0.162162	0.334324	0.99999
ko03050	Proteasome	Genetic Information Processing	Folding, sorting and degradation	6	1718	54	11182	0.111111	0.85696	0.99999
ko03060	Protein export	Genetic Information Processing	Folding, sorting and degradation	1	1718	35	11182	0.0285714	0.997114	0.99999
ko03410	Base excision repair	Genetic Information Processing	Replication and repair	8	1718	45	11182	0.177778	0.386898	0.99999
ko03420	Nucleotide excision repair	Genetic Information Processing	Replication and repair	15	1718	115	11182	0.130435	0.79225	0.99999
ko03430	Mismatch repair	Genetic Information Processing	Replication and repair	2	1718	55	11182	0.0363636	0.998883	0.99999
ko03440	Homologous recombination	Genetic Information Processing	Replication and repair	5	1718	71	11182	0.0704225	0.989455	0.99999
ko03450	Non-homologous end-joining	Genetic Information Processing	Replication and repair	1	1718	23	11182	0.0434783	0.978522	0.99999
ko03460	Fanconi anemia pathway	Genetic Information Processing	Replication and repair	9	1718	100	11182	0.09	0.978434	0.99999
ko04012	ErbB signaling pathway	Environmental Information Processing	Signal transduction	6	1718	74	11182	0.0810811	0.978898	0.99999
ko04013	MAPK signaling pathway - fly	Environmental Information Processing	Signal transduction	33	1718	371	11182	0.0889488	0.999935	0.99999
ko04014	Ras signaling pathway	Environmental Information Processing	Signal transduction	26	1718	251	11182	0.103586	0.992142	0.99999
ko04015	Rap1 signaling pathway	Environmental Information Processing	Signal transduction	29	1718	227	11182	0.127753	0.884073	0.99999
ko04020	Calcium signaling pathway	Environmental Information Processing	Signal transduction	32	1718	211	11182	0.151659	0.561963	0.99999
ko04022	cGMP-PKG signaling pathway	Environmental Information Processing	Signal transduction	35	1718	224	11182	0.15625	0.485378	0.99999
ko04024	cAMP signaling pathway	Environmental Information Processing	Signal transduction	37	1718	271	11182	0.136531	0.808326	0.99999
ko04060	Cytokine-cytokine receptor interaction	Environmental Information Processing	Signaling molecules and interaction	6	1718	38	11182	0.157895	0.539821	0.99999
ko04062	Chemokine signaling pathway	Organismal Systems	Immune system	13	1718	143	11182	0.0909091	0.990408	0.99999
ko04064	NF-kappa B signaling pathway	Environmental Information Processing	Signal transduction	11	1718	68	11182	0.161765	0.477428	0.99999
ko04066	HIF-1 signaling pathway	Environmental Information Processing	Signal transduction	26	1718	162	11182	0.160494	0.437187	0.99999
ko04070	Phosphatidylinositol signaling system	Environmental Information Processing	Signal transduction	21	1718	150	11182	0.14	0.713259	0.99999
ko04071	Sphingolipid signaling pathway	Environmental Information Processing	Signal transduction	22	1718	181	11182	0.121547	0.908376	0.99999
ko04072	Phospholipase D signaling pathway	Environmental Information Processing	Signal transduction	25	1718	161	11182	0.15528	0.510826	0.99999
ko04080	Neuroactive ligand-receptor interaction	Environmental Information Processing	Signaling molecules and interaction	15	1718	125	11182	0.12	0.882382	0.99999
ko04110	Cell cycle	Cellular Processes	Cell growth and death	23	1718	208	11182	0.110577	0.971048	0.99999
ko04114	Oocyte meiosis	Cellular Processes	Cell growth and death	16	1718	141	11182	0.113475	0.931053	0.99999
ko04115	p53 signaling pathway	Cellular Processes	Cell growth and death	4	1718	66	11182	0.0606061	0.994192	0.99999
ko04120	Ubiquitin mediated proteolysis	Genetic Information Processing	Folding, sorting and degradation	21	1718	257	11182	0.0817121	0.999826	0.99999
ko04122	Sulfur relay system	Genetic Information Processing	Folding, sorting and degradation	3	1718	22	11182	0.136364	0.679043	0.99999
ko04130	SNARE interactions in vesicular transport	Genetic Information Processing	Folding, sorting and degradation	1	1718	34	11182	0.0294118	0.996589	0.99999
ko04141	Protein processing in endoplasmic reticulum	Genetic Information Processing	Folding, sorting and degradation	33	1718	331	11182	0.0996979	0.998582	0.99999
ko04144	Endocytosis	Cellular Processes	Transport and catabolism	63	1718	416	11182	0.151442	0.572052	0.99999
ko04152	AMPK signaling pathway	Environmental Information Processing	Signal transduction	42	1718	256	11182	0.164062	0.345844	0.99999
ko04212	Longevity regulating pathway - worm	Organismal Systems	Aging	21	1718	159	11182	0.132075	0.80633	0.99999
ko04213	Longevity regulating pathway - multiple species	Organismal Systems	Aging	18	1718	126	11182	0.142857	0.669693	0.99999
ko04214	Apoptosis - fly	Cellular Processes	Cell growth and death	14	1718	146	11182	0.0958904	0.98501	0.99999
ko04215	Apoptosis - multiple species	Cellular Processes	Cell growth and death	9	1718	71	11182	0.126761	0.782632	0.99999
ko04216	Ferroptosis	Cellular Processes	Cell growth and death	9	1718	67	11182	0.134328	0.720392	0.99999
ko04218	Cellular senescence	Cellular Processes	Cell growth and death	27	1718	194	11182	0.139175	0.742563	0.99999
ko04261	Adrenergic signaling in cardiomyocytes	Organismal Systems	Circulatory system	31	1718	183	11182	0.169399	0.305009	0.99999
ko04270	Vascular smooth muscle contraction	Organismal Systems	Circulatory system	18	1718	184	11182	0.0978261	0.990168	0.99999
ko04320	Dorso-ventral axis formation	Organismal Systems	Development	25	1718	174	11182	0.143678	0.675219	0.99999
ko04330	Notch signaling pathway	Environmental Information Processing	Signal transduction	17	1718	138	11182	0.123188	0.869818	0.99999
ko04340	Hedgehog signaling pathway	Environmental Information Processing	Signal transduction	40	1718	310	11182	0.129032	0.90523	0.99999
ko04341	Hedgehog signaling pathway - fly	Environmental Information Processing	Signal transduction	27	1718	238	11182	0.113445	0.970243	0.99999
ko04360	Axon guidance	Organismal Systems	Development	22	1718	182	11182	0.120879	0.913255	0.99999
ko04370	VEGF signaling pathway	Environmental Information Processing	Signal transduction	3	1718	50	11182	0.06	0.988096	0.99999
ko04371	Apelin signaling pathway	Environmental Information Processing	Signal transduction	31	1718	209	11182	0.148325	0.614911	0.99999
ko04390	Hippo signaling pathway	Environmental Information Processing	Signal transduction	29	1718	212	11182	0.136792	0.780727	0.99999
ko04391	Hippo signaling pathway - fly	Environmental Information Processing	Signal transduction	35	1718	231	11182	0.151515	0.564634	0.99999
ko04392	Hippo signaling pathway - multiple species	Environmental Information Processing	Signal transduction	10	1718	62	11182	0.16129	0.487295	0.99999
ko04514	Cell adhesion molecules (CAMs)	Environmental Information Processing	Signaling molecules and interaction	12	1718	91	11182	0.131868	0.760539	0.99999
ko04530	Tight junction	Cellular Processes	Cellular community - eukaryotes	44	1718	329	11182	0.133739	0.863828	0.99999
ko04540	Gap junction	Cellular Processes	Cellular community - eukaryotes	9	1718	111	11182	0.0810811	0.992449	0.99999
ko04550	Signaling pathways regulating pluripotency of stem cells	Cellular Processes	Cellular community - eukaryotes	14	1718	134	11182	0.104478	0.961854	0.99999
ko04611	Platelet activation	Organismal Systems	Immune system	31	1718	205	11182	0.15122	0.568891	0.99999
ko04614	Renin-angiotensin system	Organismal Systems	Endocrine system	13	1718	79	11182	0.164557	0.440859	0.99999
ko04622	RIG-I-like receptor signaling pathway	Organismal Systems	Immune system	2	1718	31	11182	0.0645161	0.962551	0.99999
ko04623	Cytosolic DNA-sensing pathway	Organismal Systems	Immune system	3	1718	42	11182	0.0714286	0.9667	0.99999
ko04624	Toll and Imd signaling pathway	Organismal Systems	Immune system	33	1718	196	11182	0.168367	0.310663	0.99999
ko04625	C-type lectin receptor signaling pathway	Organismal Systems	Immune system	6	1718	72	11182	0.0833333	0.974017	0.99999
ko04630	Jak-STAT signaling pathway	Environmental Information Processing	Signal transduction	11	1718	82	11182	0.134146	0.733606	0.99999
ko04640	Hematopoietic cell lineage	Organismal Systems	Immune system	13	1718	72	11182	0.180556	0.308464	0.99999
ko04657	IL-17 signaling pathway	Organismal Systems	Immune system	22	1718	135	11182	0.162963	0.417512	0.99999
ko04658	Th1 and Th2 cell differentiation	Organismal Systems	Immune system	3	1718	63	11182	0.047619	0.997947	0.99999
ko04660	T cell receptor signaling pathway	Organismal Systems	Immune system	2	1718	57	11182	0.0350877	0.999175	0.99999
ko04662	B cell receptor signaling pathway	Organismal Systems	Immune system	2	1718	45	11182	0.0444444	0.995021	0.99999
ko04664	Fc epsilon RI signaling pathway	Organismal Systems	Immune system	3	1718	40	11182	0.075	0.957283	0.99999
ko04666	Fc gamma R-mediated phagocytosis	Organismal Systems	Immune system	10	1718	122	11182	0.0819672	0.993861	0.99999
ko04668	TNF signaling pathway	Environmental Information Processing	Signal transduction	6	1718	74	11182	0.0810811	0.978898	0.99999
ko04670	Leukocyte transendothelial migration	Organismal Systems	Immune system	12	1718	109	11182	0.110092	0.924585	0.99999
ko04713	Circadian entrainment	Organismal Systems	Environmental adaptation	14	1718	100	11182	0.14	0.689814	0.99999
ko04720	Long-term potentiation	Organismal Systems	Nervous system	17	1718	129	11182	0.131783	0.78987	0.99999
ko04721	Synaptic vesicle cycle	Organismal Systems	Nervous system	15	1718	122	11182	0.122951	0.859347	0.99999
ko04722	Neurotrophin signaling pathway	Organismal Systems	Nervous system	13	1718	128	11182	0.101562	0.967138	0.99999
ko04723	Retrograde endocannabinoid signaling	Organismal Systems	Nervous system	22	1718	161	11182	0.136646	0.758039	0.99999
ko04724	Glutamatergic synapse	Organismal Systems	Nervous system	17	1718	127	11182	0.133858	0.768181	0.99999
ko04725	Cholinergic synapse	Organismal Systems	Nervous system	34	1718	238	11182	0.142857	0.706439	0.99999
ko04726	Serotonergic synapse	Organismal Systems	Nervous system	12	1718	88	11182	0.136364	0.718075	0.99999
ko04727	GABAergic synapse	Organismal Systems	Nervous system	9	1718	81	11182	0.111111	0.892959	0.99999
ko04730	Long-term depression	Organismal Systems	Nervous system	2	1718	47	11182	0.0425532	0.996297	0.99999
ko04740	Olfactory transduction	Organismal Systems	Sensory system	11	1718	75	11182	0.146667	0.615955	0.99999
ko04742	Taste transduction	Organismal Systems	Sensory system	2	1718	29	11182	0.0689655	0.950547	0.99999
ko04744	Phototransduction	Organismal Systems	Sensory system	4	1718	28	11182	0.142857	0.643102	0.99999
ko04750	Inflammatory mediator regulation of TRP channels	Organismal Systems	Sensory system	11	1718	102	11182	0.107843	0.928818	0.99999
ko04911	Insulin secretion	Organismal Systems	Endocrine system	16	1718	99	11182	0.161616	0.455111	0.99999
ko04912	GnRH signaling pathway	Organismal Systems	Endocrine system	13	1718	110	11182	0.118182	0.881679	0.99999
ko04913	Ovarian steroidogenesis	Organismal Systems	Endocrine system	11	1718	59	11182	0.186441	0.291355	0.99999
ko04914	Progesterone-mediated oocyte maturation	Organismal Systems	Endocrine system	14	1718	97	11182	0.14433	0.643883	0.99999
ko04915	Estrogen signaling pathway	Organismal Systems	Endocrine system	24	1718	174	11182	0.137931	0.749293	0.99999
ko04916	Melanogenesis	Organismal Systems	Endocrine system	20	1718	133	11182	0.150376	0.579105	0.99999
ko04917	Prolactin signaling pathway	Organismal Systems	Endocrine system	6	1718	50	11182	0.12	0.801223	0.99999
ko04918	Thyroid hormone synthesis	Organismal Systems	Endocrine system	16	1718	147	11182	0.108844	0.953868	0.99999
ko04919	Thyroid hormone signaling pathway	Organismal Systems	Endocrine system	46	1718	317	11182	0.14511	0.689072	0.99999
ko04920	Adipocytokine signaling pathway	Organismal Systems	Endocrine system	14	1718	93	11182	0.150538	0.577637	0.99999
ko04923	Regulation of lipolysis in adipocytes	Organismal Systems	Endocrine system	11	1718	69	11182	0.15942	0.498064	0.99999
ko04924	Renin secretion	Organismal Systems	Endocrine system	19	1718	106	11182	0.179245	0.268044	0.99999
ko04926	Relaxin signaling pathway	Organismal Systems	Endocrine system	35	1718	219	11182	0.159817	0.427864	0.99999
ko04927	Cortisol synthesis and secretion	Organismal Systems	Endocrine system	15	1718	83	11182	0.180723	0.288211	0.99999
ko04928	Parathyroid hormone synthesis, secretion and action	Organismal Systems	Endocrine system	14	1718	120	11182	0.116667	0.899224	0.99999
ko04960	Aldosterone-regulated sodium reabsorption	Organismal Systems	Excretory system	2	1718	34	11182	0.0588235	0.975461	0.99999
ko04961	Endocrine and other factor-regulated calcium reabsorption	Organismal Systems	Excretory system	2	1718	54	11182	0.037037	0.998701	0.99999
ko04962	Vasopressin-regulated water reabsorption	Organismal Systems	Excretory system	6	1718	55	11182	0.109091	0.868687	0.99999
ko04966	Collecting duct acid secretion	Organismal Systems	Excretory system	4	1718	26	11182	0.153846	0.582039	0.99999
ko04970	Salivary secretion	Organismal Systems	Digestive system	9	1718	103	11182	0.0873786	0.983675	0.99999
ko04971	Gastric acid secretion	Organismal Systems	Digestive system	6	1718	82	11182	0.0731707	0.991088	0.99999
ko04972	Pancreatic secretion	Organismal Systems	Digestive system	33	1718	238	11182	0.138655	0.76719	0.99999
ko04973	Carbohydrate digestion and absorption	Organismal Systems	Digestive system	12	1718	68	11182	0.176471	0.348874	0.99999
ko04976	Bile secretion	Organismal Systems	Digestive system	10	1718	101	11182	0.0990099	0.959035	0.99999
ko04977	Vitamin digestion and absorption	Organismal Systems	Digestive system	27	1718	170	11182	0.158824	0.457959	0.99999
ko04978	Mineral absorption	Organismal Systems	Digestive system	2	1718	63	11182	0.031746	0.999669	0.99999
