# Supplementary material for: De Novo Transcription Responses Describe Host-Related Differentiation of Paracoccus marginatus (Hemiptera: Pseudococcidae)
Source: Insects. 2022 Sep 19;13(9):850. doi: 10.3390/insects13090850 (PMC9502998; doi:10.3390/insects13090850)
Supplement: Supplementary file 1 [file insects-13-00850-s001.zip › Table S5. UP-Pathway and DOWN-Pathway of DEGs.xlsx]

## Sheet: UP-Pathway
Gene ID	Pathway Name	Level 2	Level 1	Gene Type	Length	MF6_1 FPKM	MF6_2 FPKM	MF6_3 FPKM	TF6_1 FPKM	TF6_2 FPKM	TF6_3 FPKM	log2(TF6/MF6)	Qvalue(MF6-vs-TF6)	Pvalue(MF6-vs-TF6)	Nt	Nr	Pfam	Kog	Swissprot	GO	TFs	Kegg Orthology
CL1004.Contig7_All	ko05410//Hypertrophic cardiomyopathy (HCM);ko05414//Dilated cardiomyopathy (DCM)	Cardiovascular diseases	Human Diseases	Novel_gene	2446	8.15	3.29	5.92	8.61	17.61	19.14	1.37896	1.06331e-210	9.2231e-212	AC240970.1 Homo sapiens FOSMID clone COR2A-DD0002TS3NU_O17 from chromosome 13, complete sequence	PREDICTED: neural cell adhesion molecule 2 [Falco peregrinus]	Immunoglobulin domain	[Z] KOG0613 Projectin/twitchin and related proteins	Neural cell adhesion molecule 2 OS=Mus musculus GN=Ncam2 PE=1 SV=1			K06768//Down syndrome cell adhesion molecule-like protein 1;K12567//titin [EC:2.7.11.1]+ko05414//Dilated cardiomyopathy (DCM)+ko05410//Hypertrophic cardiomyopathy (HCM);K12567//titin [EC:2.7.11.1]+ko05414//Dilated cardiomyopathy (DCM)+ko05410//Hypertrophic cardiomyopathy (HCM);K12567//titin [EC:2.7.11.1]+ko05414//Dilated cardiomyopathy (DCM)+ko05410//Hypertrophic cardiomyopathy (HCM);K12567//titi…
CL1035.Contig1_All	ko04136//Autophagy - other;ko04140//Autophagy - animal	Transport and catabolism	Cellular Processes	Novel_gene	9002	1.22	1.53	1.83	7.1	7.84	8.16	2.33569	0	0	XM_007948292.1 PREDICTED: Orycteropus afer afer TBC1 domain containing kinase (TBCK), transcript variant X3, mRNA	PREDICTED: autophagy-related protein 2 homolog B [Diachasma alloeum]	Autophagy-related protein C terminal domain	[U] KOG2993 Cytoplasm to vacuole targeting protein	Autophagy-related protein 2 homolog B OS=Homo sapiens GN=ATG2B PE=1 SV=5			K17906//autophagy-related protein 2+ko04140//Autophagy - animal+ko04136//Autophagy - other;K17906//autophagy-related protein 2+ko04140//Autophagy - animal+ko04136//Autophagy - other;K17906//autophagy-related protein 2+ko04140//Autophagy - animal+ko04136//Autophagy - other;K17906//autophagy-related protein 2+ko04140//Autophagy - animal+ko04136//Autophagy - other;K17906//autophagy-related protein 2…
CL1098.Contig5_All	ko04142//Lysosome	Transport and catabolism	Cellular Processes	Novel_gene	5833	4.32	1.18	2.35	1.93	10.42	4.76	1.10833	3.26519e-137	4.41866e-138	XM_008555860.2 PREDICTED: Microplitis demolitor sialin (LOC103575879), transcript variant X2, mRNA	PREDICTED: sialin-like [Bemisia tabaci] >XP_018909290.1 PREDICTED: sialin-like [Bemisia tabaci]	Major Facilitator Superfamily	[E] KOG3145 Cystine transporter Cystinosin	Cystinosin homolog OS=Drosophila melanogaster GN=CG17119 PE=1 SV=2	GO:0055085//transmembrane transport;GO:0016021//integral component of membrane		K12386//cystinosin+ko04142//Lysosome;K12386//cystinosin+ko04142//Lysosome;K12386//cystinosin+ko04142//Lysosome;K12386//cystinosin+ko04142//Lysosome;K12386//cystinosin+ko04142//Lysosome
CL1103.Contig2_All	ko04910//Insulin signaling pathway	Endocrine system	Organismal Systems	Novel_gene	2151	3.34	9.74	7.54	16.02	33.33	26.89	1.87903	0	0		PREDICTED: flotillin-2 isoform X1 [Cimex lectularius]	SPFH domain / Band 7 family	[UZ] KOG2668 Flotillins	Flotillin-2 OS=Drosophila melanogaster GN=Flo2 PE=2 SV=3			K07192//flotillin+ko04910//Insulin signaling pathway;K07192//flotillin+ko04910//Insulin signaling pathway;K07192//flotillin+ko04910//Insulin signaling pathway;K07192//flotillin+ko04910//Insulin signaling pathway;K07192//flotillin+ko04910//Insulin signaling pathway
CL1103.Contig3_All	ko04910//Insulin signaling pathway	Endocrine system	Organismal Systems	Novel_gene	2253	1.76	2.72	2.34	4.91	4.95	5.18	1.14247	2.19605e-49	7.43555e-50		PREDICTED: flotillin-2 isoform X1 [Cimex lectularius]	SPFH domain / Band 7 family	[UZ] KOG2668 Flotillins	Flotillin-2a OS=Danio rerio GN=flot2a PE=2 SV=2			K07192//flotillin+ko04910//Insulin signaling pathway;K07192//flotillin+ko04910//Insulin signaling pathway;K07192//flotillin+ko04910//Insulin signaling pathway;K07192//flotillin+ko04910//Insulin signaling pathway;K07192//flotillin+ko04910//Insulin signaling pathway
CL1114.Contig3_All	ko01100//Metabolic pathways;ko05205//Proteoglycans in cancer;ko00531//Glycosaminoglycan degradation	Global and overview maps;Glycan biosynthesis and metabolism;Cancers: Overview	Metabolism;Human Diseases	Novel_gene	6454	7.36	15.74	11.05	15.04	32.47	26.5	1.10542	0	0		PREDICTED: microtubule-associated protein futsch-like [Bemisia tabaci]		[W] KOG3544 Collagens (type IV and type XIII), and related proteins	Sialidase OS=Trypanosoma cruzi GN=TCNA PE=2 SV=1	GO:0016020//membrane;GO:0016798//hydrolase activity, acting on glycosyl bonds	zf-C2H2	K07964//heparanase [EC:3.2.1.166]+ko00531//Glycosaminoglycan degradation+ko05205//Proteoglycans in cancer+ko01100//Metabolic pathways;K07964//heparanase [EC:3.2.1.166]+ko00531//Glycosaminoglycan degradation+ko05205//Proteoglycans in cancer+ko01100//Metabolic pathways;K07964//heparanase [EC:3.2.1.166]+ko00531//Glycosaminoglycan degradation+ko05205//Proteoglycans in cancer+ko01100//Metabolic pathwa…
CL1114.Contig4_All	ko00531//Glycosaminoglycan degradation;ko01100//Metabolic pathways;ko05205//Proteoglycans in cancer	Global and overview maps;Cancers: Overview;Glycan biosynthesis and metabolism	Human Diseases;Metabolism	Novel_gene	6334	10.05	18.79	21.06	25.17	49.47	39.56	1.18706	0	0		PREDICTED: microtubule-associated protein futsch-like [Bemisia tabaci]		[T] KOG0587 Traf2- and Nck-interacting kinase and related germinal center kinase (GCK) family protein kinases	Protein split ends OS=Drosophila melanogaster GN=spen PE=1 SV=2	GO:0016020//membrane;GO:0016798//hydrolase activity, acting on glycosyl bonds		K07964//heparanase [EC:3.2.1.166]+ko00531//Glycosaminoglycan degradation+ko05205//Proteoglycans in cancer+ko01100//Metabolic pathways;K07964//heparanase [EC:3.2.1.166]+ko00531//Glycosaminoglycan degradation+ko05205//Proteoglycans in cancer+ko01100//Metabolic pathways;K07964//heparanase [EC:3.2.1.166]+ko00531//Glycosaminoglycan degradation+ko05205//Proteoglycans in cancer+ko01100//Metabolic pathwa…
CL1114.Contig5_All	ko00531//Glycosaminoglycan degradation;ko01100//Metabolic pathways;ko05205//Proteoglycans in cancer	Global and overview maps;Glycan biosynthesis and metabolism;Cancers: Overview	Metabolism;Human Diseases	Novel_gene	6193	6.75	14.88	15.94	17.87	37.77	30.68	1.19118	0	0		PREDICTED: microtubule-associated protein futsch-like [Bemisia tabaci]		[W] KOG3544 Collagens (type IV and type XIII), and related proteins	Protein split ends OS=Drosophila melanogaster GN=spen PE=1 SV=2	GO:0016020//membrane;GO:0016798//hydrolase activity, acting on glycosyl bonds		K07964//heparanase [EC:3.2.1.166]+ko00531//Glycosaminoglycan degradation+ko05205//Proteoglycans in cancer+ko01100//Metabolic pathways;K07964//heparanase [EC:3.2.1.166]+ko00531//Glycosaminoglycan degradation+ko05205//Proteoglycans in cancer+ko01100//Metabolic pathways;K07964//heparanase [EC:3.2.1.166]+ko00531//Glycosaminoglycan degradation+ko05205//Proteoglycans in cancer+ko01100//Metabolic pathwa…
CL1121.Contig1_All	ko04144//Endocytosis;ko05132//Salmonella infection;ko04670//Leukocyte transendothelial migration;ko04015//Rap1 signaling pathway;ko05100//Bacterial invasion of epithelial cells;ko04530//Tight junction;ko05131//Shigellosis;ko04666//Fc gamma R-mediated phagocytosis;ko04611//Platelet activation;ko04022//cGMP-PKG signaling pathway;ko04062//Chemokine signaling pathway;ko04510//Focal adhesion;ko04810//…	Cancers: Overview;Immune system;Transport and catabolism;Cell motility;Infectious diseases: Bacterial;Signal transduction;Cellular community - eukaryotes	Cellular Processes;Human Diseases;Environmental Information Processing;Organismal Systems	Novel_gene	1712	1.56	2.81	2.3	4.05	6.48	5.36	1.24957	4.59782e-45	1.67521e-45		PREDICTED: formin-binding protein 4 [Myotis lucifugus]	Granulocyte-macrophage colony-stimulating factor	[M] LSE0601 A Pollen extensin-like protein (Pex)	Uncharacterized proline-rich protein (Fragment) OS=Owenia fusiformis PE=4 SV=1		zf-C2H2	K20638//Rho GTPase-activating protein 17+ko04530//Tight junction;K06274//vasodilator-stimulated phosphoprotein+ko04022//cGMP-PKG signaling pathway+ko04510//Focal adhesion+ko04611//Platelet activation+ko04666//Fc gamma R-mediated phagocytosis+ko04530//Tight junction+ko04670//Leukocyte transendothelial migration+ko04015//Rap1 signaling pathway;K05748//WAS protein family, member 2+ko05132//Salmonell…
CL1127.Contig2_All	ko00590//Arachidonic acid metabolism;ko01100//Metabolic pathways	Global and overview maps;Lipid metabolism	Metabolism	Novel_gene	1646	46.35	58.34	66.28	112.48	157.81	124.25	1.20666	0	0	LT841392.1 Plasmodium cynomolgi genome assembly, chromosome: 14	p23-like protein [Coptotermes formosanus]	CS domain	[O] KOG3158 HSP90 co-chaperone p23	Prostaglandin E synthase 3 OS=Oryctolagus cuniculus GN=PTGES3 PE=3 SV=1			K15730//cytosolic prostaglandin-E synthase [EC:5.3.99.3]+ko00590//Arachidonic acid metabolism+ko01100//Metabolic pathways;K15730//cytosolic prostaglandin-E synthase [EC:5.3.99.3]+ko00590//Arachidonic acid metabolism+ko01100//Metabolic pathways;K15730//cytosolic prostaglandin-E synthase [EC:5.3.99.3]+ko00590//Arachidonic acid metabolism+ko01100//Metabolic pathways;K15730//cytosolic prostaglandin-E…
CL120.Contig2_All	ko04110//Cell cycle;ko03030//DNA replication	Replication and repair;Cell growth and death	Cellular Processes;Genetic Information Processing	Novel_gene	1107	1.81	2.09	1.76	14.52	22.22	14.49	3.17869	1.17629e-293	7.36459e-295		sideroflexin-1 [Myzus persicae]	Tricarboxylate carrier	[R] KOG3767 Sideroflexin	Sideroflexin-1 OS=Homo sapiens GN=SFXN1 PE=1 SV=4	GO:0015075//ion transmembrane transporter activity;GO:0016021//integral component of membrane;GO:0031966//mitochondrial membrane		K02542//DNA replication licensing factor MCM6 [EC:3.6.4.12]+ko03030//DNA replication+ko04110//Cell cycle
CL1230.Contig2_All	ko00600//Sphingolipid metabolism;ko04071//Sphingolipid signaling pathway	Signal transduction;Lipid metabolism	Environmental Information Processing;Metabolism	Novel_gene	2076	5.21	8.35	7.03	17.7	25.22	15.19	1.49688	1.79337e-258	1.2924e-259		sphingosine-1-phosphate phosphatase 2-like [Myzus persicae]	PAP2 superfamily	[I] KOG2822 Sphingoid base-phosphate phosphatase	Sphingosine-1-phosphate phosphatase 2 OS=Mus musculus GN=Sgpp2 PE=2 SV=1	GO:0016021//integral component of membrane		K04716//sphingosine-1-phosphate phosphatase 1 [EC:3.1.3.-]+ko04071//Sphingolipid signaling pathway+ko00600//Sphingolipid metabolism;K04716//sphingosine-1-phosphate phosphatase 1 [EC:3.1.3.-]+ko04071//Sphingolipid signaling pathway+ko00600//Sphingolipid metabolism;K04716//sphingosine-1-phosphate phosphatase 1 [EC:3.1.3.-]+ko04071//Sphingolipid signaling pathway+ko00600//Sphingolipid metabolism;K04…
CL1260.Contig2_All	ko03420//Nucleotide excision repair;ko03410//Base excision repair;ko03030//DNA replication	Replication and repair	Genetic Information Processing	Novel_gene	4206	3.41	2.64	1.4	16.79	11.24	13.86	2.49795	0	0	XM_021730952.1 PREDICTED: Ictidomys tridecemlineatus zinc finger protein 358 (Znf358), mRNA	DNA polymerase epsilon subunit 2 [Zootermopsis nevadensis] >KDR06663.1 DNA polymerase epsilon subunit 2 [Zootermopsis nevadensis]	DNA polymerase alpha/epsilon subunit B	[L] KOG3818 DNA polymerase epsilon, subunit B	DNA polymerase epsilon subunit 2 OS=Bos taurus GN=POLE2 PE=2 SV=1	GO:0003887//DNA-directed DNA polymerase activity;GO:0003677//DNA binding;GO:0006261//DNA-dependent DNA replication;GO:0008622//epsilon DNA polymerase complex	ZBTB	K02325//DNA polymerase epsilon subunit 2 [EC:2.7.7.7]+ko03420//Nucleotide excision repair+ko03030//DNA replication+ko03410//Base excision repair;K02325//DNA polymerase epsilon subunit 2 [EC:2.7.7.7]+ko03420//Nucleotide excision repair+ko03030//DNA replication+ko03410//Base excision repair;K02325//DNA polymerase epsilon subunit 2 [EC:2.7.7.7]+ko03420//Nucleotide excision repair+ko03030//DNA replic…
CL1290.Contig1_All	ko04925//Aldosterone synthesis and secretion;ko04728//Dopaminergic synapse;ko04970//Salivary secretion;ko05016//Huntington disease;ko04015//Rap1 signaling pathway;ko04611//Platelet activation;ko04310//Wnt signaling pathway;ko04928//Parathyroid hormone synthesis, secretion and action;ko04724//Glutamatergic synapse;ko05142//Chagas disease (American trypanosomiasis);ko04911//Insulin secretion;ko0514…	Signal transduction;Neurodegenerative diseases;Endocrine system;Cellular community - eukaryotes;Immune system;Endocrine and metabolic diseases;Infectious diseases: Parasitic;Sensory system;Excretory system;Circulatory system;Environmental adaptation;Infectious diseases: Viral;Digestive system;Carbohydrate metabolism;Nervous system;Cancers: Overview;Global and overview maps	Metabolism;Environmental Information Processing;Organismal Systems;Cellular Processes;Human Diseases	Novel_gene	2049	2.18	2.07	2.49	5.01	5.27	5.31	1.21286	5.88893e-51	1.94591e-51		putative uncharacterized protein DDB_G0271606 isoform X3 [Myzus persicae]	Pentapeptide repeats (9 copies)	[A] KOG1960 Predicted RNA-binding protein, contains KH domains	UPF0469 protein KIAA0907 OS=Homo sapiens GN=KIAA0907 PE=1 SV=1			K05858//phosphatidylinositol phospholipase C, beta [EC:3.1.4.11]+ko04022//cGMP-PKG signaling pathway+ko04020//Calcium signaling pathway+ko04730//Long-term depression+ko04933//AGE-RAGE signaling pathway in diabetic complications+ko04070//Phosphatidylinositol signaling system+ko04071//Sphingolipid signaling pathway+ko04072//Phospholipase D signaling pathway+ko04919//Thyroid hormone signaling pathwa…
CL1290.Contig4_All	ko03018//RNA degradation	Folding, sorting and degradation	Genetic Information Processing	Novel_gene	1346	9.28	8.57	6.67	15.83	17	16.45	1.01023	4.64795e-76	1.09328e-76		PREDICTED: pyrazinamidase/nicotinamidase [Nicrophorus vespilloides] >XP_017781664.1 PREDICTED: pyrazinamidase/nicotinamidase [Nicrophorus vespilloides] >XP_017781665.1 PREDICTED: pyrazinamidase/nicotinamidase [Nicrophorus vespilloides] >XP_017781666.1 PREDICTED: pyrazinamidase/nicotinamidase [Nicrophorus vespilloides]	Isochorismatase family	[V] KOG4003 Pyrazinamidase/nicotinamidase PNC1		GO:0006769//nicotinamide metabolic process;GO:0008936//nicotinamidase activity;GO:0008152//metabolic process;GO:0005509//calcium ion binding;GO:0003824//catalytic activity;GO:0005737//cytoplasm		K03679//exosome complex component RRP4+ko03018//RNA degradation;K03679//exosome complex component RRP4+ko03018//RNA degradation;K03679//exosome complex component RRP4+ko03018//RNA degradation;K03679//exosome complex component RRP4+ko03018//RNA degradation;K03679//exosome complex component RRP4+ko03018//RNA degradation
CL1292.Contig5_All	ko04520//Adherens junction;ko04137//Mitophagy - animal;ko03008//Ribosome biogenesis in eukaryotes;ko05168//Herpes simplex infection;ko05162//Measles;ko04310//Wnt signaling pathway;ko04064//NF-kappa B signaling pathway	Signal transduction;Translation;Infectious diseases: Viral;Transport and catabolism;Cellular community - eukaryotes	Genetic Information Processing;Cellular Processes;Environmental Information Processing;Human Diseases	Novel_gene	1318	2.11	3.2	2.44	4.32	6.56	4.77	1.01257	8.91053e-25	5.03348e-25	XM_003490846.2 PREDICTED: Bombus impatiens casein kinase II subunit beta (LOC100750200), transcript variant X3, mRNA	PREDICTED: casein kinase II subunit beta [Agrilus planipennis]	Casein kinase II regulatory subunit	[TDK] KOG3092 Casein kinase II, beta subunit	Casein kinase II subunit beta OS=Bos taurus GN=CSNK2B PE=1 SV=1	GO:0019887//protein kinase regulator activity;GO:0016301//kinase activity;GO:0005956//protein kinase CK2 complex		K03115//casein kinase II subunit beta+ko04310//Wnt signaling pathway+ko04137//Mitophagy - animal+ko04520//Adherens junction+ko03008//Ribosome biogenesis in eukaryotes+ko04064//NF-kappa B signaling pathway+ko05162//Measles+ko05168//Herpes simplex infection;K03115//casein kinase II subunit beta+ko04310//Wnt signaling pathway+ko04137//Mitophagy - animal+ko04520//Adherens junction+ko03008//Ribosome b…
CL1292.Contig6_All	ko05168//Herpes simplex infection;ko04520//Adherens junction;ko03008//Ribosome biogenesis in eukaryotes;ko04064//NF-kappa B signaling pathway;ko04137//Mitophagy - animal;ko05162//Measles;ko04310//Wnt signaling pathway	Signal transduction;Translation;Cellular community - eukaryotes;Transport and catabolism;Infectious diseases: Viral	Genetic Information Processing;Cellular Processes;Human Diseases;Environmental Information Processing	Novel_gene	1281	6.37	11.81	10.93	20.61	33.79	33.47	1.59083	9.48657e-256	6.89839e-257	XM_003490846.2 PREDICTED: Bombus impatiens casein kinase II subunit beta (LOC100750200), transcript variant X3, mRNA	PREDICTED: casein kinase II subunit beta [Agrilus planipennis]	Casein kinase II regulatory subunit	[TDK] KOG3092 Casein kinase II, beta subunit	Casein kinase II subunit beta OS=Bos taurus GN=CSNK2B PE=1 SV=1	GO:0019887//protein kinase regulator activity;GO:0016301//kinase activity;GO:0005956//protein kinase CK2 complex		K03115//casein kinase II subunit beta+ko04310//Wnt signaling pathway+ko04137//Mitophagy - animal+ko04520//Adherens junction+ko03008//Ribosome biogenesis in eukaryotes+ko04064//NF-kappa B signaling pathway+ko05162//Measles+ko05168//Herpes simplex infection;K03115//casein kinase II subunit beta+ko04310//Wnt signaling pathway+ko04137//Mitophagy - animal+ko04520//Adherens junction+ko03008//Ribosome b…
CL1378.Contig3_All	ko04212//Longevity regulating pathway - worm;ko00073//Cutin, suberine and wax biosynthesis;ko04146//Peroxisome	Transport and catabolism;Lipid metabolism;Aging	Metabolism;Cellular Processes;Organismal Systems	Novel_gene	1850	1.54	1.34	3.41	6.24	12.37	11.05	2.23387	3.90848e-201	3.57711e-202		fatty acyl-CoA reductase [Ericerus pela]	Male sterility protein	[I] KOG1221 Acyl-CoA reductase	Fatty acyl-CoA reductase 1 OS=Rattus norvegicus GN=Far1 PE=2 SV=1	GO:0080019//fatty-acyl-CoA reductase (alcohol-forming) activity;GO:0016021//integral component of membrane;GO:0102965//alcohol-forming fatty acyl-CoA reductase activity;GO:0006629//lipid metabolic process		K13356//alcohol-forming fatty acyl-CoA reductase [EC:1.2.1.84]+ko04146//Peroxisome+ko04212//Longevity regulating pathway - worm+ko00073//Cutin, suberine and wax biosynthesis
CL1423.Contig3_All	ko04072//Phospholipase D signaling pathway;ko04810//Regulation of actin cytoskeleton;ko01100//Metabolic pathways;ko00562//Inositol phosphate metabolism;ko04070//Phosphatidylinositol signaling system;ko04666//Fc gamma R-mediated phagocytosis;ko05231//Choline metabolism in cancer;ko04144//Endocytosis	Global and overview maps;Transport and catabolism;Immune system;Signal transduction;Carbohydrate metabolism;Cell motility;Cancers: Overview	Cellular Processes;Organismal Systems;Human Diseases;Metabolism;Environmental Information Processing	Novel_gene	4253	5.46	3.5	3.97	13.98	13.7	13.96	1.68895	0	0	XM_017909861.1 PREDICTED: Eufriesea mexicana phosphatidylinositol 4-phosphate 5-kinase type-1 alpha (LOC108554551), partial mRNA	PREDICTED: phosphatidylinositol 4-phosphate 5-kinase type-1 alpha isoform X9 [Bemisia tabaci]	Phosphatidylinositol-4-phosphate 5-Kinase	[T] KOG0229 Phosphatidylinositol-4-phosphate 5-kinase	Phosphatidylinositol 4-phosphate 5-kinase type-1 gamma OS=Homo sapiens GN=PIP5K1C PE=1 SV=2			K00889//1-phosphatidylinositol-4-phosphate 5-kinase [EC:2.7.1.68]+ko04144//Endocytosis+ko04810//Regulation of actin cytoskeleton+ko04070//Phosphatidylinositol signaling system+ko04072//Phospholipase D signaling pathway+ko04666//Fc gamma R-mediated phagocytosis+ko00562//Inositol phosphate metabolism+ko05231//Choline metabolism in cancer+ko01100//Metabolic pathways;K00889//1-phosphatidylinositol-4-…
CL1428.Contig5_All	ko04013//MAPK signaling pathway - fly	Signal transduction	Environmental Information Processing	Novel_gene	5547	1.45	1.25	1.45	1.72	4.09	2.84	1.047	3.24317e-61	9.07736e-62		Myoneurin-like Protein [Tribolium castaneum]	BTB/POZ domain	[PT] KOG3599 Ca2+-modulated nonselective cation channel polycystin	Sex determination protein fruitless OS=Drosophila melanogaster GN=fru PE=1 SV=1		ZBTB	K09237//tramtrack+ko04013//MAPK signaling pathway - fly;K09237//tramtrack+ko04013//MAPK signaling pathway - fly;K09237//tramtrack+ko04013//MAPK signaling pathway - fly;K09237//tramtrack+ko04013//MAPK signaling pathway - fly;K09237//tramtrack+ko04013//MAPK signaling pathway - fly
CL1457.Contig10_All	ko01100//Metabolic pathways;ko00790//Folate biosynthesis;ko04727//GABAergic synapse	Global and overview maps;Nervous system;Metabolism of cofactors and vitamins	Organismal Systems;Metabolism	Novel_gene	1388	42.87	59.96	57.03	191.72	307.14	323.31	2.35958	0	0		PREDICTED: regulator of microtubule dynamics protein 1-like isoform X3 [Bemisia tabaci]	Tetratricopeptide repeat		Regulator of microtubule dynamics protein 1 OS=Bos taurus GN=RMDN1 PE=2 SV=1			K15376//gephyrin [EC:2.10.1.1 2.7.7.75]+ko04727//GABAergic synapse+ko01100//Metabolic pathways+ko00790//Folate biosynthesis
CL1457.Contig1_All	ko04727//GABAergic synapse;ko01100//Metabolic pathways;ko00790//Folate biosynthesis	Nervous system;Metabolism of cofactors and vitamins;Global and overview maps	Organismal Systems;Metabolism	Novel_gene	1357	1.31	2.53	1.63	5.72	2.07	3.22	1.03072	3.3646e-19	2.26343e-19		PREDICTED: regulator of microtubule dynamics protein 1-like isoform X3 [Bemisia tabaci]	Tetratricopeptide repeat		Regulator of microtubule dynamics protein 1 OS=Bos taurus GN=RMDN1 PE=2 SV=1			K15376//gephyrin [EC:2.10.1.1 2.7.7.75]+ko04727//GABAergic synapse+ko01100//Metabolic pathways+ko00790//Folate biosynthesis
CL1457.Contig2_All	ko01100//Metabolic pathways;ko04727//GABAergic synapse;ko00790//Folate biosynthesis	Global and overview maps;Nervous system;Metabolism of cofactors and vitamins	Organismal Systems;Metabolism	Novel_gene	1159	7.67	11.56	10.41	17.42	25.87	28.73	1.27941	2.08703e-136	2.84471e-137		PREDICTED: regulator of microtubule dynamics protein 1-like isoform X3 [Bemisia tabaci]	Tetratricopeptide repeat		Regulator of microtubule dynamics protein 1 OS=Bos taurus GN=RMDN1 PE=2 SV=1			K15376//gephyrin [EC:2.10.1.1 2.7.7.75]+ko04727//GABAergic synapse+ko01100//Metabolic pathways+ko00790//Folate biosynthesis
CL1473.Contig3_All	ko03013//RNA transport;ko03015//mRNA surveillance pathway	Translation	Genetic Information Processing	Novel_gene	2791	5.21	8.89	8.45	6.83	22.76	16.92	1.03145	3.24834e-156	3.8627e-157	XM_014358999.1 PREDICTED: Copidosoma floridanum serine/arginine repetitive matrix protein 1 (LOC106643743), mRNA	PREDICTED: serine/arginine repetitive matrix protein 1-like isoform X1 [Diuraphis noxia] >XP_015371353.1 PREDICTED: serine/arginine repetitive matrix protein 1-like isoform X1 [Diuraphis noxia] >XP_015371354.1 PREDICTED: serine/arginine repetitive matrix protein 1-like isoform X1 [Diuraphis noxia]	PWI domain	[K] KOG1874 KEKE-like motif-containing transcription regulator (Rlr1)/suppressor of sin4	Splicing regulatory glutamine/lysine-rich protein 1 OS=Homo sapiens GN=SREK1 PE=1 SV=1	GO:0006397//mRNA processing	HMG	K13171//serine/arginine repetitive matrix protein 1+ko03013//RNA transport+ko03015//mRNA surveillance pathway;K13171//serine/arginine repetitive matrix protein 1+ko03013//RNA transport+ko03015//mRNA surveillance pathway;K13171//serine/arginine repetitive matrix protein 1+ko03013//RNA transport+ko03015//mRNA surveillance pathway;K13171//serine/arginine repetitive matrix protein 1+ko03013//RNA tran…
CL15.Contig4_All	ko05034//Alcoholism;ko05203//Viral carcinogenesis;ko05322//Systemic lupus erythematosus	Substance dependence;Immune diseases;Cancers: Overview	Human Diseases	Novel_gene	3765	1.86	2.62	1.97	1.2	10.44	4.95	1.34056	6.97766e-115	1.11719e-115	XM_015582457.1 PREDICTED: Dufourea novaeangliae histone H2B-like (LOC107193073), mRNA	PREDICTED: histone H2B-like [Cimex lectularius]	Core histone H2A/H2B/H3/H4	[B] KOG1744 Histone H2B	Histone H2B OS=Chironomus thummi thummi PE=3 SV=2			K11252//histone H2B+ko05322//Systemic lupus erythematosus+ko05034//Alcoholism+ko05203//Viral carcinogenesis;K11252//histone H2B+ko05322//Systemic lupus erythematosus+ko05034//Alcoholism+ko05203//Viral carcinogenesis;K11252//histone H2B+ko05322//Systemic lupus erythematosus+ko05034//Alcoholism+ko05203//Viral carcinogenesis;K11252//histone H2B+ko05322//Systemic lupus erythematosus+ko05034//Alcoholi…
CL1502.Contig2_All	ko01230//Biosynthesis of amino acids;ko01100//Metabolic pathways;ko00260//Glycine, serine and threonine metabolism	Amino acid metabolism;Global and overview maps	Metabolism	Novel_gene	1816	11.5	9.93	9.23	17.33	23.47	20.73	1.00448	9.42836e-128	1.35379e-128		PREDICTED: probable low-specificity L-threonine aldolase 2 [Bemisia tabaci]	Beta-eliminating lyase	[E] KOG1368 Threonine aldolase	Uncharacterized protein R102.4 OS=Caenorhabditis elegans GN=R102.4 PE=3 SV=3			K01620//threonine aldolase [EC:4.1.2.48]+ko01230//Biosynthesis of amino acids+ko00260//Glycine, serine and threonine metabolism+ko01100//Metabolic pathways;K01620//threonine aldolase [EC:4.1.2.48]+ko01230//Biosynthesis of amino acids+ko00260//Glycine, serine and threonine metabolism+ko01100//Metabolic pathways;K01620//threonine aldolase [EC:4.1.2.48]+ko01230//Biosynthesis of amino acids+ko00260//…
CL151.Contig10_All	ko05226//Gastric cancer;ko05146//Amoebiasis	Infectious diseases: Parasitic;Cancers: Specific types	Human Diseases	Novel_gene	3772	10.05	1.67	6.41	16.34	19.4	13.61	1.4481	0	0		uncharacterized protein, partial [Leishmania mexicana MHOM/GT/2001/U1103] >CBZ40949.1 unnamed protein product, partial [Leishmania mexicana MHOM/GT/2001/U1103]		[T] KOG1187 Serine/threonine protein kinase	Mucin-2 OS=Homo sapiens GN=MUC2 PE=1 SV=2	GO:0010468//regulation of gene expression;GO:0003682//chromatin binding;GO:0016021//integral component of membrane		K22016//mucin-3/17;K10955//mucin-2+ko05226//Gastric cancer+ko05146//Amoebiasis;K10955//mucin-2+ko05226//Gastric cancer+ko05146//Amoebiasis;K10955//mucin-2+ko05226//Gastric cancer+ko05146//Amoebiasis;K22016//mucin-3/17
CL151.Contig15_All	ko05226//Gastric cancer;ko05146//Amoebiasis	Infectious diseases: Parasitic;Cancers: Specific types	Human Diseases	Novel_gene	3742	9.53	4.69	7.33	17.89	13.08	21.3	1.28316	0	0		PREDICTED: serine-rich adhesin for platelets [Tupaia chinensis]		[T] KOG1187 Serine/threonine protein kinase	Mucin-2 OS=Homo sapiens GN=MUC2 PE=1 SV=2	GO:0010468//regulation of gene expression;GO:0003682//chromatin binding;GO:0016021//integral component of membrane		K22016//mucin-3/17;K10955//mucin-2+ko05226//Gastric cancer+ko05146//Amoebiasis;K10955//mucin-2+ko05226//Gastric cancer+ko05146//Amoebiasis;K22016//mucin-3/17;K10955//mucin-2+ko05226//Gastric cancer+ko05146//Amoebiasis
CL161.Contig4_All	ko00480//Glutathione metabolism;ko00981//Insect hormone biosynthesis;ko04918//Thyroid hormone synthesis;ko00590//Arachidonic acid metabolism;ko04216//Ferroptosis	Metabolism of other amino acids;Metabolism of terpenoids and polyketides;Lipid metabolism;Cell growth and death;Endocrine system	Metabolism;Cellular Processes;Organismal Systems	Novel_gene	1969	1.88	7.24	2.28	7.59	10.95	11.95	1.41243	2.97108e-118	4.63425e-119		PREDICTED: probable phospholipid hydroperoxide glutathione peroxidase isoform X1 [Diaphorina citri] >XP_017298100.1 PREDICTED: probable phospholipid hydroperoxide glutathione peroxidase isoform X2 [Diaphorina citri]	Glutathione peroxidase	[O] KOG1651 Glutathione peroxidase	Glutathione peroxidase OS=Schistosoma mansoni GN=GPX1 PE=1 SV=2	GO:0006979//response to oxidative stress;GO:0004602//glutathione peroxidase activity;GO:0016021//integral component of membrane		K00432//glutathione peroxidase [EC:1.11.1.9]+ko04918//Thyroid hormone synthesis+ko00590//Arachidonic acid metabolism+ko00480//Glutathione metabolism;K00432//glutathione peroxidase [EC:1.11.1.9]+ko04918//Thyroid hormone synthesis+ko00590//Arachidonic acid metabolism+ko00480//Glutathione metabolism;K00432//glutathione peroxidase [EC:1.11.1.9]+ko04918//Thyroid hormone synthesis+ko00590//Arachidonic …
CL1610.Contig2_All	ko01100//Metabolic pathways;ko00230//Purine metabolism	Nucleotide metabolism;Global and overview maps	Metabolism	Novel_gene	1802	10.17	13.2	8.75	20.83	22.77	26.4	1.12387	8.0206e-173	8.55241e-174		PREDICTED: adenosine kinase 2 [Cephus cinctus]	pfkB family carbohydrate kinase	[G] KOG2854 Possible pfkB family carbohydrate kinase	Adenosine kinase OS=Rattus norvegicus GN=Adk PE=1 SV=3			K00856//adenosine kinase [EC:2.7.1.20]+ko00230//Purine metabolism+ko01100//Metabolic pathways;K00856//adenosine kinase [EC:2.7.1.20]+ko00230//Purine metabolism+ko01100//Metabolic pathways;K00856//adenosine kinase [EC:2.7.1.20]+ko00230//Purine metabolism+ko01100//Metabolic pathways;K00856//adenosine kinase [EC:2.7.1.20]+ko00230//Purine metabolism+ko01100//Metabolic pathways;K00856//adenosine kinas…
CL1620.Contig2_All	ko04962//Vasopressin-regulated water reabsorption;ko04145//Phagosome;ko05132//Salmonella infection	Excretory system;Infectious diseases: Bacterial;Transport and catabolism	Human Diseases;Cellular Processes;Organismal Systems	Novel_gene	680	2.04	3.16	4.8	3.55	7.79	9.43	1.05395	2.25925e-17	1.62175e-17	XM_015328081.1 PREDICTED: Polistes dominula cytoplasmic dynein 1 intermediate chain-like (LOC107070153), transcript variant X14, mRNA	cytoplasmic dynein 1 intermediate chain isoform X3 [Nilaparvata lugens]	Cytoplasmic dynein 1 intermediate chain 2	[Z] KOG1587 Cytoplasmic dynein intermediate chain	Cytoplasmic dynein 1 intermediate chain OS=Drosophila melanogaster GN=sw PE=1 SV=3			K10415//dynein intermediate chain, cytosolic+ko04145//Phagosome+ko05132//Salmonella infection+ko04962//Vasopressin-regulated water reabsorption;K10415//dynein intermediate chain, cytosolic+ko04145//Phagosome+ko05132//Salmonella infection+ko04962//Vasopressin-regulated water reabsorption;K10415//dynein intermediate chain, cytosolic+ko04145//Phagosome+ko05132//Salmonella infection+ko04962//Vasopres…
CL1666.Contig2_All	ko01100//Metabolic pathways;ko00564//Glycerophospholipid metabolism;ko00440//Phosphonate and phosphinate metabolism;ko00565//Ether lipid metabolism	Lipid metabolism;Global and overview maps;Metabolism of other amino acids	Metabolism	Novel_gene	5163	4.99	4.63	6.86	12.23	15.06	13.14	1.29442	0	0		cholinephosphotransferase 1 isoform X3 [Zootermopsis nevadensis] >KDR22680.1 Choline/ethanolaminephosphotransferase 1 [Zootermopsis nevadensis]	CDP-alcohol phosphatidyltransferase	[I] KOG2877 sn-1,2-diacylglycerol ethanolamine- and cholinephosphotranferases	Choline/ethanolaminephosphotransferase 1 OS=Gallus gallus GN=CEPT1 PE=2 SV=2			K00993//ethanolaminephosphotransferase [EC:2.7.8.1]+ko00440//Phosphonate and phosphinate metabolism+ko00564//Glycerophospholipid metabolism+ko00565//Ether lipid metabolism+ko01100//Metabolic pathways;K00993//ethanolaminephosphotransferase [EC:2.7.8.1]+ko00440//Phosphonate and phosphinate metabolism+ko00564//Glycerophospholipid metabolism+ko00565//Ether lipid metabolism+ko01100//Metabolic pathways…
CL1698.Contig2_All	ko03018//RNA degradation	Folding, sorting and degradation	Genetic Information Processing	Novel_gene	1955	2.26	2.5	3.44	3.6	8.39	4.74	1.02199	1.3942e-39	5.61319e-40		exosome component 10 [Zootermopsis nevadensis] >KDR14061.1 Exosome component 10 [Zootermopsis nevadensis]	3'-5' exonuclease	[J] KOG2206 Exosome 3'-5' exoribonuclease complex, subunit PM/SCL-100 (Rrp6)	Exosome component 10 OS=Mus musculus GN=Exosc10 PE=1 SV=2	GO:0006396//RNA processing;GO:0008408//3'-5' exonuclease activity;GO:0000166//nucleotide binding;GO:0000176//nuclear exosome (RNase complex);GO:0003676//nucleic acid binding		K12591//exosome complex exonuclease RRP6 [EC:3.1.13.-]+ko03018//RNA degradation;K12591//exosome complex exonuclease RRP6 [EC:3.1.13.-]+ko03018//RNA degradation;K12591//exosome complex exonuclease RRP6 [EC:3.1.13.-]+ko03018//RNA degradation;K12591//exosome complex exonuclease RRP6 [EC:3.1.13.-]+ko03018//RNA degradation;K12591//exosome complex exonuclease RRP6 [EC:3.1.13.-]+ko03018//RNA degradation
CL1708.Contig3_All	ko00620//Pyruvate metabolism;ko04152//AMPK signaling pathway;ko01100//Metabolic pathways;ko00061//Fatty acid biosynthesis;ko04910//Insulin signaling pathway;ko01212//Fatty acid metabolism;ko04922//Glucagon signaling pathway;ko00640//Propanoate metabolism	Lipid metabolism;Global and overview maps;Endocrine system;Carbohydrate metabolism;Signal transduction	Environmental Information Processing;Organismal Systems;Metabolism	Novel_gene	7808	9.24	3.67	4.33	17.26	24.57	19.97	1.83855	0	0	XM_015655289.1 PREDICTED: Neodiprion lecontei acetyl-CoA carboxylase (LOC107217669), transcript variant X5, mRNA	PREDICTED: acetyl-CoA carboxylase isoform X3 [Bemisia tabaci]	Acetyl-CoA carboxylase, central region	[I] KOG0368 Acetyl-CoA carboxylase	Acetyl-CoA carboxylase 1 OS=Mus musculus GN=Acaca PE=1 SV=1		zf-C2H2	K11262//acetyl-CoA carboxylase / biotin carboxylase 1 [EC:6.4.1.2 6.3.4.14 2.1.3.15]+ko04910//Insulin signaling pathway+ko00640//Propanoate metabolism+ko00061//Fatty acid biosynthesis+ko00620//Pyruvate metabolism+ko04152//AMPK signaling pathway+ko01100//Metabolic pathways+ko01212//Fatty acid metabolism+ko04922//Glucagon signaling pathway;K11262//acetyl-CoA carboxylase / biotin carboxylase 1 [EC:6…
CL1708.Contig4_All	ko04152//AMPK signaling pathway;ko00640//Propanoate metabolism;ko01100//Metabolic pathways;ko00620//Pyruvate metabolism;ko04922//Glucagon signaling pathway;ko01212//Fatty acid metabolism;ko00061//Fatty acid biosynthesis;ko04910//Insulin signaling pathway	Carbohydrate metabolism;Lipid metabolism;Endocrine system;Global and overview maps;Signal transduction	Environmental Information Processing;Metabolism;Organismal Systems	Novel_gene	7638	11.42	3.65	5.58	16.13	27.08	21.17	1.63518	0	0	XM_015655289.1 PREDICTED: Neodiprion lecontei acetyl-CoA carboxylase (LOC107217669), transcript variant X5, mRNA	PREDICTED: acetyl-CoA carboxylase isoform X3 [Bemisia tabaci]	Acetyl-CoA carboxylase, central region	[I] KOG0368 Acetyl-CoA carboxylase	Acetyl-CoA carboxylase 1 OS=Mus musculus GN=Acaca PE=1 SV=1		zf-C2H2	K11262//acetyl-CoA carboxylase / biotin carboxylase 1 [EC:6.4.1.2 6.3.4.14 2.1.3.15]+ko04910//Insulin signaling pathway+ko00640//Propanoate metabolism+ko00061//Fatty acid biosynthesis+ko00620//Pyruvate metabolism+ko04152//AMPK signaling pathway+ko01100//Metabolic pathways+ko01212//Fatty acid metabolism+ko04922//Glucagon signaling pathway;K11262//acetyl-CoA carboxylase / biotin carboxylase 1 [EC:6…
CL1749.Contig1_All	ko04320//Dorso-ventral axis formation	Development	Organismal Systems	Novel_gene	2777	3.58	2.79	7.2	34.66	43.13	42.34	3.14732	0	0		glycosphingolipid synthetase [Plutella xylostella]	Glycosyl transferase family group 2		Beta-1,4-mannosyltransferase egh OS=Drosophila melanogaster GN=egh PE=2 SV=1			K02359//egghead protein (zeste-white 4 protein)+ko04320//Dorso-ventral axis formation;K02359//egghead protein (zeste-white 4 protein)+ko04320//Dorso-ventral axis formation;K02359//egghead protein (zeste-white 4 protein)+ko04320//Dorso-ventral axis formation;K02359//egghead protein (zeste-white 4 protein)+ko04320//Dorso-ventral axis formation;K02359//egghead protein (zeste-white 4 protein)+ko04320…
CL1768.Contig3_All	ko01100//Metabolic pathways;ko01212//Fatty acid metabolism;ko00062//Fatty acid elongation;ko01040//Biosynthesis of unsaturated fatty acids	Global and overview maps;Lipid metabolism	Metabolism	Novel_gene	2031	11.81	5.86	9.48	15.57	24.56	15.48	1.03313	8.60606e-136	1.17959e-136	XM_015647315.2 PREDICTED: Parus major spalt like transcription factor 4 (SALL4), transcript variant X5, mRNA	PREDICTED: elongation of very long chain fatty acids protein 6 isoform X2 [Tribolium castaneum] >EFA03752.1 Elongation of very long chain fatty acids protein 6-like Protein [Tribolium castaneum]	GNS1/SUR4 family	[I] KOG3072 Long chain fatty acid elongase	Elongation of very long chain fatty acids protein 6 OS=Danio rerio GN=elovl6 PE=2 SV=1	GO:0102336//3-oxo-arachidoyl-CoA synthase activity;GO:0102756//very-long-chain 3-ketoacyl-CoA synthase activity;GO:0102337//3-oxo-cerotoyl-CoA synthase activity;GO:0016021//integral component of membrane;GO:0006633//fatty acid biosynthetic process;GO:0102338//3-oxo-lignoceronyl-CoA synthase activity		K10203//elongation of very long chain fatty acids protein 6 [EC:2.3.1.199]+ko01040//Biosynthesis of unsaturated fatty acids+ko00062//Fatty acid elongation+ko01100//Metabolic pathways+ko01212//Fatty acid metabolism;K10203//elongation of very long chain fatty acids protein 6 [EC:2.3.1.199]+ko01040//Biosynthesis of unsaturated fatty acids+ko00062//Fatty acid elongation+ko01100//Metabolic pathways+ko…
CL1804.Contig2_All	ko04144//Endocytosis;ko04217//Necroptosis	Transport and catabolism;Cell growth and death	Cellular Processes	Novel_gene	1460	1.4	1.44	2.16	3.4	5.72	2.79	1.25205	2.89493e-29	1.46068e-29		protein FAM49B isoform X1 [Zootermopsis nevadensis] >KDR17574.1 hypothetical protein L798_08484 [Zootermopsis nevadensis]	Protein of unknown function (DUF1394)	[S] KOG3951 Uncharacterized conserved protein	Protein FAM49B OS=Mus musculus GN=Fam49b PE=1 SV=1			K12196//vacuolar protein-sorting-associated protein 4+ko04144//Endocytosis+ko04217//Necroptosis
CL187.Contig6_All	ko04340//Hedgehog signaling pathway;ko04341//Hedgehog signaling pathway - fly	Signal transduction	Environmental Information Processing	Novel_gene	1541	4.91	6.09	6.2	10.23	14.47	13.82	1.16235	1.0255e-85	2.16024e-86		PREDICTED: speckle-type POZ protein B [Ciona intestinalis]	BTB/POZ domain	[DR] KOG1987 Speckle-type POZ protein SPOP and related proteins with TRAF, MATH and BTB/POZ domains	Protein roadkill OS=Drosophila melanogaster GN=rdx PE=1 SV=2		Others	K10523//speckle-type POZ protein+ko04341//Hedgehog signaling pathway - fly+ko04340//Hedgehog signaling pathway;K10523//speckle-type POZ protein+ko04341//Hedgehog signaling pathway - fly+ko04340//Hedgehog signaling pathway;K10523//speckle-type POZ protein+ko04341//Hedgehog signaling pathway - fly+ko04340//Hedgehog signaling pathway;K10523//speckle-type POZ protein+ko04341//Hedgehog signaling pathw…
CL1877.Contig2_All	ko03320//PPAR signaling pathway	Endocrine system	Organismal Systems	Novel_gene	1456	1.01	1.38	1.28	41.68	44.6	53.38	5.25213	0	0	XM_009016214.1 Helobdella robusta hypothetical protein partial mRNA	diazepam binding inhibitor [Xenopus laevis] >AAI28949.1 Dbib protein [Xenopus laevis] >OCT63227.1 hypothetical protein XELAEV_18044325mg [Xenopus laevis]		[I] KOG0817 Acyl-CoA-binding protein	Probable serine/threonine-protein kinase DDB_G0278845 OS=Dictyostelium discoideum GN=DDB_G0278845 PE=3 SV=1	GO:0000062//fatty-acyl-CoA binding		K08762//diazepam-binding inhibitor (GABA receptor modulator, acyl-CoA-binding protein)+ko03320//PPAR signaling pathway;K08762//diazepam-binding inhibitor (GABA receptor modulator, acyl-CoA-binding protein)+ko03320//PPAR signaling pathway;K08762//diazepam-binding inhibitor (GABA receptor modulator, acyl-CoA-binding protein)+ko03320//PPAR signaling pathway;K08762//diazepam-binding inhibitor (GABA r…
CL196.Contig2_All	ko01040//Biosynthesis of unsaturated fatty acids;ko04212//Longevity regulating pathway - worm;ko04152//AMPK signaling pathway;ko01212//Fatty acid metabolism;ko03320//PPAR signaling pathway	Aging;Global and overview maps;Lipid metabolism;Endocrine system;Signal transduction	Organismal Systems;Environmental Information Processing;Metabolism	Novel_gene	1596	13.98	8.24	12.7	20.6	29.96	24.76	1.10946	4.69459e-160	5.4243e-161		PREDICTED: acyl-CoA Delta(11) desaturase [Bemisia tabaci]		[I] KOG1600 Fatty acid desaturase	Acyl-CoA desaturase 4 OS=Mus musculus GN=Scd4 PE=1 SV=1	GO:0016021//integral component of membrane;GO:0006633//fatty acid biosynthetic process;GO:0016717//oxidoreductase activity, acting on paired donors, with oxidation of a pair of donors resulting in the reduction of molecular oxygen to two molecules of water		K00507//stearoyl-CoA desaturase (Delta-9 desaturase) [EC:1.14.19.1]+ko03320//PPAR signaling pathway+ko01040//Biosynthesis of unsaturated fatty acids+ko04212//Longevity regulating pathway - worm+ko04152//AMPK signaling pathway+ko01212//Fatty acid metabolism;K00507//stearoyl-CoA desaturase (Delta-9 desaturase) [EC:1.14.19.1]+ko03320//PPAR signaling pathway+ko01040//Biosynthesis of unsaturated fatty…
CL196.Contig3_All	ko01212//Fatty acid metabolism;ko04212//Longevity regulating pathway - worm;ko04152//AMPK signaling pathway;ko01040//Biosynthesis of unsaturated fatty acids;ko03320//PPAR signaling pathway	Global and overview maps;Lipid metabolism;Endocrine system;Signal transduction;Aging	Environmental Information Processing;Organismal Systems;Metabolism	Novel_gene	1707	7.76	3.22	9.37	14.15	30.55	13.47	1.51202	2.95492e-213	2.53095e-214		PREDICTED: acyl-CoA Delta(11) desaturase [Bemisia tabaci]		[I] KOG1600 Fatty acid desaturase	Acyl-CoA desaturase 4 OS=Mus musculus GN=Scd4 PE=1 SV=1	GO:0016021//integral component of membrane;GO:0006633//fatty acid biosynthetic process;GO:0016717//oxidoreductase activity, acting on paired donors, with oxidation of a pair of donors resulting in the reduction of molecular oxygen to two molecules of water		K00507//stearoyl-CoA desaturase (Delta-9 desaturase) [EC:1.14.19.1]+ko03320//PPAR signaling pathway+ko01040//Biosynthesis of unsaturated fatty acids+ko04212//Longevity regulating pathway - worm+ko04152//AMPK signaling pathway+ko01212//Fatty acid metabolism;K00507//stearoyl-CoA desaturase (Delta-9 desaturase) [EC:1.14.19.1]+ko03320//PPAR signaling pathway+ko01040//Biosynthesis of unsaturated fatty…
CL2009.Contig4_All	ko04141//Protein processing in endoplasmic reticulum	Folding, sorting and degradation	Genetic Information Processing	Novel_gene	4771	4.55	5.2	6.29	7.4	16.28	10.39	1.07938	9.88271e-214	8.44328e-215	LT594630.1 Plasmodium malariae genome assembly, chromosome: 9	ribosome-binding protein 1 [Nilaparvata lugens]	TPR/MLP1/MLP2-like protein	[J] LSE3605 H Ribosome binding protein	Ribosome-binding protein 1 OS=Mus musculus GN=Rrbp1 PE=1 SV=2		zf-C2H2	K14000//ribosome-binding protein 1+ko04141//Protein processing in endoplasmic reticulum;K14000//ribosome-binding protein 1+ko04141//Protein processing in endoplasmic reticulum;K14000//ribosome-binding protein 1+ko04141//Protein processing in endoplasmic reticulum;K14000//ribosome-binding protein 1+ko04141//Protein processing in endoplasmic reticulum;K14000//ribosome-binding protein 1+ko04141//Pro…
CL2009.Contig6_All	ko04141//Protein processing in endoplasmic reticulum	Folding, sorting and degradation	Genetic Information Processing	Novel_gene	4768	3.77	3.18	6.02	5.14	13.47	10.38	1.15171	1.65632e-201	1.5123e-202	LT594630.1 Plasmodium malariae genome assembly, chromosome: 9	ribosome-binding protein 1 [Nilaparvata lugens]	TPR/MLP1/MLP2-like protein	[J] LSE3605 H Ribosome binding protein	Ribosome-binding protein 1 OS=Mus musculus GN=Rrbp1 PE=1 SV=2		zf-C2H2	K14000//ribosome-binding protein 1+ko04141//Protein processing in endoplasmic reticulum;K14000//ribosome-binding protein 1+ko04141//Protein processing in endoplasmic reticulum;K14000//ribosome-binding protein 1+ko04141//Protein processing in endoplasmic reticulum;K14000//ribosome-binding protein 1+ko04141//Protein processing in endoplasmic reticulum;K14000//ribosome-binding protein 1+ko04141//Pro…
CL2010.Contig1_All	ko00073//Cutin, suberine and wax biosynthesis;ko04212//Longevity regulating pathway - worm;ko04146//Peroxisome	Lipid metabolism;Transport and catabolism;Aging	Cellular Processes;Metabolism;Organismal Systems	Novel_gene	2252	1.23	1.59	1.53	2.98	3.63	2.32	1.0407	5.27707e-26	2.89322e-26		fatty acyl-CoA reductase I [Phenacoccus solenopsis]	Male sterility protein	[I] KOG1221 Acyl-CoA reductase	Fatty acyl-CoA reductase wat OS=Drosophila melanogaster GN=wat PE=1 SV=1	GO:0080019//fatty-acyl-CoA reductase (alcohol-forming) activity;GO:0016021//integral component of membrane;GO:0102965//alcohol-forming fatty acyl-CoA reductase activity;GO:0006629//lipid metabolic process		K13356//alcohol-forming fatty acyl-CoA reductase [EC:1.2.1.84]+ko04146//Peroxisome+ko04212//Longevity regulating pathway - worm+ko00073//Cutin, suberine and wax biosynthesis;K13356//alcohol-forming fatty acyl-CoA reductase [EC:1.2.1.84]+ko04146//Peroxisome+ko04212//Longevity regulating pathway - worm+ko00073//Cutin, suberine and wax biosynthesis;K13356//alcohol-forming fatty acyl-CoA reductase [E…
CL2013.Contig2_All	ko00920//Sulfur metabolism;ko01100//Metabolic pathways	Global and overview maps;Energy metabolism	Metabolism	Novel_gene	1239	6.98	8.39	7.76	20.02	18.66	15	1.22273	7.75522e-103	1.37487e-103		PREDICTED: 3'(2'),5'-bisphosphate nucleotidase 1 [Microplitis demolitor]	Inositol monophosphatase family	[F] KOG3099 Bisphosphate 3'-nucleotidase BPNT1/Inositol polyphosphate 1-phosphatase	3'(2'),5'-bisphosphate nucleotidase 1 OS=Homo sapiens GN=BPNT1 PE=1 SV=1	GO:0008441//3'(2'),5'-bisphosphate nucleotidase activity;GO:0046854//phosphatidylinositol phosphorylation		K01082//3'(2'), 5'-bisphosphate nucleotidase [EC:3.1.3.7]+ko00920//Sulfur metabolism+ko01100//Metabolic pathways;K01082//3'(2'), 5'-bisphosphate nucleotidase [EC:3.1.3.7]+ko00920//Sulfur metabolism+ko01100//Metabolic pathways;K01082//3'(2'), 5'-bisphosphate nucleotidase [EC:3.1.3.7]+ko00920//Sulfur metabolism+ko01100//Metabolic pathways;K01082//3'(2'), 5'-bisphosphate nucleotidase [EC:3.1.3.7]+ko…
CL2040.Contig1_All	ko01212//Fatty acid metabolism;ko01040//Biosynthesis of unsaturated fatty acids;ko03320//PPAR signaling pathway;ko04212//Longevity regulating pathway - worm;ko04152//AMPK signaling pathway	Endocrine system;Signal transduction;Global and overview maps;Lipid metabolism;Aging	Metabolism;Organismal Systems;Environmental Information Processing	Novel_gene	2657	1.5	1.52	2.59	3.97	5.88	3.44	1.24636	5.86073e-59	1.69579e-59	XM_022310789.1 PREDICTED: Myzus persicae acyl-CoA Delta(11) desaturase-like (LOC111031013), transcript variant X3, mRNA	Acyl-CoA Delta(11) desaturase [Zootermopsis nevadensis]	Fatty acid desaturase	[I] KOG1600 Fatty acid desaturase	Acyl-CoA Delta(11) desaturase OS=Trichoplusia ni GN=D11DS PE=1 SV=2	GO:0016021//integral component of membrane;GO:0006633//fatty acid biosynthetic process;GO:0016717//oxidoreductase activity, acting on paired donors, with oxidation of a pair of donors resulting in the reduction of molecular oxygen to two molecules of water		K00507//stearoyl-CoA desaturase (Delta-9 desaturase) [EC:1.14.19.1]+ko03320//PPAR signaling pathway+ko01040//Biosynthesis of unsaturated fatty acids+ko04212//Longevity regulating pathway - worm+ko04152//AMPK signaling pathway+ko01212//Fatty acid metabolism;K00507//stearoyl-CoA desaturase (Delta-9 desaturase) [EC:1.14.19.1]+ko03320//PPAR signaling pathway+ko01040//Biosynthesis of unsaturated fatty…
CL2051.Contig3_All	ko01100//Metabolic pathways;ko00270//Cysteine and methionine metabolism	Amino acid metabolism;Global and overview maps	Metabolism	Novel_gene	1661	3.73	7.29	5.76	10.72	22.66	16.11	1.55392	1.2816e-183	1.28857e-184		PREDICTED: methylthioribulose-1-phosphate dehydratase [Aethina tumida]	Class II Aldolase and Adducin N-terminal domain	[G] KOG2631 Class II aldolase/adducin N-terminal domain protein	Methylthioribulose-1-phosphate dehydratase OS=Lithobates catesbeiana GN=apip PE=2 SV=1			K08964//methylthioribulose-1-phosphate dehydratase [EC:4.2.1.109]+ko01100//Metabolic pathways+ko00270//Cysteine and methionine metabolism;K08964//methylthioribulose-1-phosphate dehydratase [EC:4.2.1.109]+ko01100//Metabolic pathways+ko00270//Cysteine and methionine metabolism;K08964//methylthioribulose-1-phosphate dehydratase [EC:4.2.1.109]+ko01100//Metabolic pathways+ko00270//Cysteine and methion…
CL2092.Contig1_All	ko00563//Glycosylphosphatidylinositol (GPI)-anchor biosynthesis;ko01100//Metabolic pathways	Global and overview maps;Glycan biosynthesis and metabolism	Metabolism	Novel_gene	944	5.39	9.3	9.04	22.88	33.72	20.64	1.70545	3.86626e-179	3.99233e-180		PREDICTED: phosphatidylinositol N-acetylglucosaminyltransferase subunit P isoform X1 [Bemisia tabaci]	PIG-P	[S] KOG2257 N-acetylglucosaminyltransferase complex, subunit PIG-P, required for phosphatidylinositol biosynthesis	Phosphatidylinositol N-acetylglucosaminyltransferase subunit P OS=Mus musculus GN=Pigp PE=2 SV=1	GO:0006506//GPI anchor biosynthetic process;GO:0017176//phosphatidylinositol N-acetylglucosaminyltransferase activity;GO:0016021//integral component of membrane		K03861//phosphatidylinositol glycan, class P+ko00563//Glycosylphosphatidylinositol (GPI)-anchor biosynthesis+ko01100//Metabolic pathways;K03861//phosphatidylinositol glycan, class P+ko00563//Glycosylphosphatidylinositol (GPI)-anchor biosynthesis+ko01100//Metabolic pathways;K03861//phosphatidylinositol glycan, class P+ko00563//Glycosylphosphatidylinositol (GPI)-anchor biosynthesis+ko01100//Metabol…
CL2092.Contig3_All	ko00563//Glycosylphosphatidylinositol (GPI)-anchor biosynthesis;ko01100//Metabolic pathways	Global and overview maps;Glycan biosynthesis and metabolism	Metabolism	Novel_gene	1495	4.71	5.62	7.68	12.97	15.79	14.29	1.26011	3.078e-105	5.35305e-106	KJ667071.1 Rapana venosa clone Amf18 microsatellite sequence	PREDICTED: phosphatidylinositol N-acetylglucosaminyltransferase subunit P isoform X1 [Bemisia tabaci]	PIG-P	[S] KOG2257 N-acetylglucosaminyltransferase complex, subunit PIG-P, required for phosphatidylinositol biosynthesis	Phosphatidylinositol N-acetylglucosaminyltransferase subunit P OS=Mus musculus GN=Pigp PE=2 SV=1	GO:0006506//GPI anchor biosynthetic process;GO:0017176//phosphatidylinositol N-acetylglucosaminyltransferase activity;GO:0016021//integral component of membrane		K03861//phosphatidylinositol glycan, class P+ko00563//Glycosylphosphatidylinositol (GPI)-anchor biosynthesis+ko01100//Metabolic pathways;K03861//phosphatidylinositol glycan, class P+ko00563//Glycosylphosphatidylinositol (GPI)-anchor biosynthesis+ko01100//Metabolic pathways;K03861//phosphatidylinositol glycan, class P+ko00563//Glycosylphosphatidylinositol (GPI)-anchor biosynthesis+ko01100//Metabol…
CL2105.Contig4_All	ko01100//Metabolic pathways;ko01210//2-Oxocarboxylic acid metabolism;ko00380//Tryptophan metabolism;ko00300//Lysine biosynthesis;ko00310//Lysine degradation	Global and overview maps;Amino acid metabolism	Metabolism	Novel_gene	1673	5.97	4.38	13.01	20.14	21.66	18.74	1.38104	4.73227e-191	4.57281e-192		PREDICTED: kynurenine/alpha-aminoadipate aminotransferase, mitochondrial-like [Bemisia tabaci]	Aminotransferase class I and II	[E] KOG0634 Aromatic amino acid aminotransferase and related proteins	Kynurenine/alpha-aminoadipate aminotransferase, mitochondrial OS=Homo sapiens GN=AADAT PE=1 SV=2	GO:0009058//biosynthetic process;GO:0008483//transaminase activity;GO:0030170//pyridoxal phosphate binding		K00825//kynurenine/2-aminoadipate aminotransferase [EC:2.6.1.7 2.6.1.39]+ko00300//Lysine biosynthesis+ko00310//Lysine degradation+ko00380//Tryptophan metabolism+ko01100//Metabolic pathways+ko01210//2-Oxocarboxylic acid metabolism;K00825//kynurenine/2-aminoadipate aminotransferase [EC:2.6.1.7 2.6.1.39]+ko00300//Lysine biosynthesis+ko00310//Lysine degradation+ko00380//Tryptophan metabolism+ko01100/…
CL213.Contig7_All	ko04975//Fat digestion and absorption;ko01100//Metabolic pathways;ko00564//Glycerophospholipid metabolism;ko04072//Phospholipase D signaling pathway;ko00561//Glycerolipid metabolism	Global and overview maps;Signal transduction;Digestive system;Lipid metabolism	Environmental Information Processing;Metabolism;Organismal Systems	Novel_gene	3778	2.08	5.15	1.19	13.26	11.34	10.62	2.06525	0	0		PREDICTED: 1-acyl-sn-glycerol-3-phosphate acyltransferase beta-like [Bemisia tabaci]	Acyltransferase	[I] KOG2848 1-acyl-sn-glycerol-3-phosphate acyltransferase	1-acyl-sn-glycerol-3-phosphate acyltransferase alpha OS=Bos taurus GN=AGPAT1 PE=2 SV=1			K13509//lysophosphatidate acyltransferase [EC:2.3.1.51]+ko04072//Phospholipase D signaling pathway+ko04975//Fat digestion and absorption+ko00564//Glycerophospholipid metabolism+ko00561//Glycerolipid metabolism+ko01100//Metabolic pathways;K13509//lysophosphatidate acyltransferase [EC:2.3.1.51]+ko04072//Phospholipase D signaling pathway+ko04975//Fat digestion and absorption+ko00564//Glycerophosphol…
CL2155.Contig2_All	ko04621//NOD-like receptor signaling pathway;ko03022//Basal transcription factors	Transcription;Immune system	Genetic Information Processing;Organismal Systems	Novel_gene	1872	1.21	2.32	1.56	5.74	4.88	5.64	1.67999	3.96503e-78	9.09804e-79		arrestin domain-containing protein 2-like [Zootermopsis nevadensis] >KDR08474.1 Arrestin domain-containing protein 3 [Zootermopsis nevadensis]	Arrestin (or S-antigen), N-terminal domain	[R] KOG3780 Thioredoxin binding protein TBP-2/VDUP1	Arrestin domain-containing protein 3 OS=Rattus norvegicus GN=Arrdc3 PE=2 SV=1			K03138//transcription initiation factor TFIIF subunit alpha+ko03022//Basal transcription factors;K11318//ataxin-7;K20910//thioredoxin-interacting protein+ko04621//NOD-like receptor signaling pathway;K20910//thioredoxin-interacting protein+ko04621//NOD-like receptor signaling pathway;K20910//thioredoxin-interacting protein+ko04621//NOD-like receptor signaling pathway
CL2244.Contig9_All	ko01100//Metabolic pathways;ko00564//Glycerophospholipid metabolism;ko00561//Glycerolipid metabolism	Lipid metabolism;Global and overview maps	Metabolism	Novel_gene	4059	1.48	2.01	4.21	2.74	11.04	3.77	1.176	1.79183e-107	3.05391e-108		PREDICTED: phosphatidate phosphatase LPIN3 isoform X1 [Cimex lectularius]	LNS2 (Lipin/Ned1/Smp2)	[NI] KOG2116 Protein involved in plasmid maintenance/nuclear protein involved in lipid metabolism	Phosphatidate phosphatase LPIN1 OS=Mus musculus GN=Lpin1 PE=1 SV=1			K15728//phosphatidate phosphatase LPIN [EC:3.1.3.4]+ko00564//Glycerophospholipid metabolism+ko00561//Glycerolipid metabolism+ko01100//Metabolic pathways;K15728//phosphatidate phosphatase LPIN [EC:3.1.3.4]+ko00564//Glycerophospholipid metabolism+ko00561//Glycerolipid metabolism+ko01100//Metabolic pathways;K15728//phosphatidate phosphatase LPIN [EC:3.1.3.4]+ko00564//Glycerophospholipid metabolism+k…
CL2266.Contig2_All	ko04150//mTOR signaling pathway	Signal transduction	Environmental Information Processing	Novel_gene	2423	2.34	1.09	1.03	1.65	4.95	3.25	1.13261	1.26591e-34	5.65122e-35		AAEL004188-PA, partial [Aedes aegypti]	Protein of unknown function (DUF4240)		CAP-Gly domain-containing linker protein 1 OS=Gallus gallus GN=CLIP1 PE=2 SV=1			K11499//centromere protein F;K10421//CAP-Gly domain-containing linker protein 1+ko04150//mTOR signaling pathway;K11498//centromeric protein E
CL2371.Contig6_All	ko00562//Inositol phosphate metabolism;ko01100//Metabolic pathways;ko04070//Phosphatidylinositol signaling system	Signal transduction;Global and overview maps;Carbohydrate metabolism	Environmental Information Processing;Metabolism	Novel_gene	4259	3.24	4.95	4.74	9.8	13.71	14.31	1.54421	0	0		conserved hypothetical protein [Pediculus humanus corporis] >EEB18657.1 conserved hypothetical protein [Pediculus humanus corporis]	C2 domain	[R] KOG1012 Ca2+-dependent lipid-binding protein CLB1/vesicle protein vp115/Granuphilin A, contains C2 domain	Extended synaptotagmin-1 OS=Rattus norvegicus GN=Esyt1 PE=1 SV=1	GO:0008289//lipid binding;GO:0016021//integral component of membrane		K19909//synaptotagmin-9;K00923//phosphatidylinositol-4-phosphate 3-kinase [EC:2.7.1.154]+ko04070//Phosphatidylinositol signaling system+ko00562//Inositol phosphate metabolism+ko01100//Metabolic pathways;K19906//synaptotagmin-6;K19909//synaptotagmin-9
CL2400.Contig1_All	ko04390//Hippo signaling pathway;ko04391//Hippo signaling pathway - fly;ko04392//Hippo signaling pathway - multiple species	Signal transduction	Environmental Information Processing	Novel_gene	2829	2.6	3.81	2.23	5.99	8.31	6.33	1.25092	4.19135e-97	7.84057e-98	XM_015937701.1 PREDICTED: Tetranychus urticae protein scalloped-like (LOC107369729), mRNA	transcriptional enhancer factor TEF-1 [Zootermopsis nevadensis]	TEA/ATTS domain family	[K] KOG3841 TEF-1 and related transcription factor, TEAD family	Transcriptional enhancer factor TEF-3 OS=Mus musculus GN=Tead4 PE=1 SV=2		TEA	K09448//transcriptional enhancer factor+ko04391//Hippo signaling pathway - fly+ko04390//Hippo signaling pathway+ko04392//Hippo signaling pathway - multiple species;K09448//transcriptional enhancer factor+ko04391//Hippo signaling pathway - fly+ko04390//Hippo signaling pathway+ko04392//Hippo signaling pathway - multiple species;K09448//transcriptional enhancer factor+ko04391//Hippo signaling pathwa…
CL2452.Contig3_All	ko04624//Toll and Imd signaling pathway	Immune system	Organismal Systems	Novel_gene	5019	6.69	4.9	5.98	9.48	17.16	17.29	1.31582	0	0		PREDICTED: protein toll [Halyomorpha halys]	Leucine rich repeat	[T] KOG4641 FOG: Toll/interleukin receptor and related proteins containing LRR and TIR repeats	Leucine-rich repeat-containing protein 15 OS=Mus musculus GN=Lrrc15 PE=2 SV=1	GO:0007165//signal transduction;GO:0004721//phosphoprotein phosphatase activity;GO:0016021//integral component of membrane;GO:0045087//innate immune response		K18809//protein toll+ko04624//Toll and Imd signaling pathway;K18809//protein toll+ko04624//Toll and Imd signaling pathway;K18809//protein toll+ko04624//Toll and Imd signaling pathway;K18809//protein toll+ko04624//Toll and Imd signaling pathway
CL2471.Contig3_All	ko00620//Pyruvate metabolism;ko00630//Glyoxylate and dicarboxylate metabolism;ko01100//Metabolic pathways;ko00270//Cysteine and methionine metabolism;ko00020//Citrate cycle (TCA cycle);ko01200//Carbon metabolism	Amino acid metabolism;Global and overview maps;Carbohydrate metabolism	Metabolism	Novel_gene	2338	13.42	18	15.95	50.16	54.74	54.96	1.75552	0	0	LM559567.1 Onchocerca flexuosa genome assembly O_flexuosa_Cordoba ,scaffold OFLC_contig0017735	malate mitochondrial [Lasius niger]	lactate/malate dehydrogenase, alpha/beta C-terminal domain	[C] KOG1494 NAD-dependent malate dehydrogenase	Malate dehydrogenase, mitochondrial OS=Bos taurus GN=MDH2 PE=1 SV=1	GO:0006099//tricarboxylic acid cycle;GO:0005975//carbohydrate metabolic process;GO:0030060//L-malate dehydrogenase activity;GO:0006108//malate metabolic process		K00026//malate dehydrogenase [EC:1.1.1.37]+ko01200//Carbon metabolism+ko00020//Citrate cycle (TCA cycle)+ko00620//Pyruvate metabolism+ko01100//Metabolic pathways+ko00270//Cysteine and methionine metabolism+ko00630//Glyoxylate and dicarboxylate metabolism;K00026//malate dehydrogenase [EC:1.1.1.37]+ko01200//Carbon metabolism+ko00020//Citrate cycle (TCA cycle)+ko00620//Pyruvate metabolism+ko01100//M…
CL2490.Contig3_All	ko04624//Toll and Imd signaling pathway	Immune system	Organismal Systems	Novel_gene	5174	1.65	3.93	4.49	4.54	9.59	7.91	1.12223	2.78061e-160	3.20677e-161	EF092021.1 Maconellicoccus hirsutus clone WHMH3718 gram negative bacteria binding protein 2-like protein mRNA, partial cds	PREDICTED: uncharacterized protein LOC109031452 [Bemisia tabaci]	WSC domain	[GO] KOG4157 beta-1,6-N-acetylglucosaminyltransferase, contains WSC domain	Beta-1,3-glucan-binding protein OS=Tenebrio molitor GN=GRP PE=1 SV=1	GO:0004553//hydrolase activity, hydrolyzing O-glycosyl compounds;GO:0005975//carbohydrate metabolic process		K20697//gram-negative bacteria-binding protein 1+ko04624//Toll and Imd signaling pathway;K20697//gram-negative bacteria-binding protein 1+ko04624//Toll and Imd signaling pathway;K20697//gram-negative bacteria-binding protein 1+ko04624//Toll and Imd signaling pathway;K20697//gram-negative bacteria-binding protein 1+ko04624//Toll and Imd signaling pathway;K20697//gram-negative bacteria-binding prot…
CL2556.Contig8_All	ko03018//RNA degradation	Folding, sorting and degradation	Genetic Information Processing	Novel_gene	2661	1.04	1.81	1.7	3.35	4.48	4.24	1.40464	2.88016e-64	7.79211e-65		PREDICTED: poly(A)-specific ribonuclease PARN-like, partial [Neodiprion lecontei]	CAF1 family ribonuclease	[L] KOG1990 Poly(A)-specific exoribonuclease PARN	Poly(A)-specific ribonuclease PARN OS=Mus musculus GN=Parn PE=1 SV=1			K01148//poly(A)-specific ribonuclease [EC:3.1.13.4]+ko03018//RNA degradation;K01148//poly(A)-specific ribonuclease [EC:3.1.13.4]+ko03018//RNA degradation;K01148//poly(A)-specific ribonuclease [EC:3.1.13.4]+ko03018//RNA degradation;K01148//poly(A)-specific ribonuclease [EC:3.1.13.4]+ko03018//RNA degradation;K01148//poly(A)-specific ribonuclease [EC:3.1.13.4]+ko03018//RNA degradation
CL2600.Contig1_All	ko01100//Metabolic pathways;ko00020//Citrate cycle (TCA cycle)	Global and overview maps;Carbohydrate metabolism	Metabolism	Novel_gene	4239	4.35	9.5	17.06	49.84	37.38	53.51	2.19302	0	0	XM_015578678.1 PREDICTED: Dufourea novaeangliae ATP-citrate synthase (LOC107189980), transcript variant X2, mRNA	PREDICTED: ATP-citrate synthase [Diuraphis noxia] >XP_015379618.1 PREDICTED: ATP-citrate synthase [Diuraphis noxia] >XP_015379627.1 PREDICTED: ATP-citrate synthase [Diuraphis noxia]	ATP citrate lyase citrate-binding	[C] KOG1254 ATP-citrate lyase	ATP-citrate synthase OS=Mus musculus GN=Acly PE=1 SV=1	GO:0006101//citrate metabolic process;GO:0006085//acetyl-CoA biosynthetic process;GO:0003878//ATP citrate synthase activity;GO:0046872//metal ion binding;GO:0005524//ATP binding;GO:0048037//cofactor binding;GO:0005737//cytoplasm;GO:0006629//lipid metabolic process		K01648//ATP citrate (pro-S)-lyase [EC:2.3.3.8]+ko00020//Citrate cycle (TCA cycle)+ko01100//Metabolic pathways;K01648//ATP citrate (pro-S)-lyase [EC:2.3.3.8]+ko00020//Citrate cycle (TCA cycle)+ko01100//Metabolic pathways;K01648//ATP citrate (pro-S)-lyase [EC:2.3.3.8]+ko00020//Citrate cycle (TCA cycle)+ko01100//Metabolic pathways;K01648//ATP citrate (pro-S)-lyase [EC:2.3.3.8]+ko00020//Citrate cycle…
CL2600.Contig3_All	ko00020//Citrate cycle (TCA cycle);ko01100//Metabolic pathways	Carbohydrate metabolism;Global and overview maps	Metabolism	Novel_gene	4283	50.01	32.42	71.75	128.83	199.45	109.02	1.50383	0	0	XM_015578678.1 PREDICTED: Dufourea novaeangliae ATP-citrate synthase (LOC107189980), transcript variant X2, mRNA	PREDICTED: ATP-citrate synthase [Diuraphis noxia] >XP_015379618.1 PREDICTED: ATP-citrate synthase [Diuraphis noxia] >XP_015379627.1 PREDICTED: ATP-citrate synthase [Diuraphis noxia]	ATP citrate lyase citrate-binding	[C] KOG1254 ATP-citrate lyase	ATP-citrate synthase OS=Mus musculus GN=Acly PE=1 SV=1	GO:0006101//citrate metabolic process;GO:0006085//acetyl-CoA biosynthetic process;GO:0003878//ATP citrate synthase activity;GO:0046872//metal ion binding;GO:0005524//ATP binding;GO:0048037//cofactor binding;GO:0005737//cytoplasm;GO:0006629//lipid metabolic process		K01648//ATP citrate (pro-S)-lyase [EC:2.3.3.8]+ko00020//Citrate cycle (TCA cycle)+ko01100//Metabolic pathways;K01648//ATP citrate (pro-S)-lyase [EC:2.3.3.8]+ko00020//Citrate cycle (TCA cycle)+ko01100//Metabolic pathways;K01648//ATP citrate (pro-S)-lyase [EC:2.3.3.8]+ko00020//Citrate cycle (TCA cycle)+ko01100//Metabolic pathways;K01648//ATP citrate (pro-S)-lyase [EC:2.3.3.8]+ko00020//Citrate cycle…
CL2614.Contig1_All	ko05169//Epstein-Barr virus infection;ko03050//Proteasome	Folding, sorting and degradation;Infectious diseases: Viral	Human Diseases;Genetic Information Processing	Novel_gene	3181	4.96	5.75	2.97	6.63	17.65	11.63	1.37987	1.07063e-218	8.97235e-220	XM_017055319.1 PREDICTED: Apis cerana 26S protease regulatory subunit 7 (LOC107996987), mRNA	PREDICTED: 26S protease regulatory subunit 7 [Cimex lectularius] >XP_014239192.1 PREDICTED: 26S protease regulatory subunit 7 [Cimex lectularius]	ATPase family associated with various cellular activities (AAA)	[O] KOG0729 26S proteasome regulatory complex, ATPase RPT1	26S proteasome regulatory subunit 7 OS=Xenopus laevis GN=psmc2 PE=2 SV=1	GO:0005524//ATP binding;GO:0036402//proteasome-activating ATPase activity;GO:0030163//protein catabolic process;GO:0005737//cytoplasm		K03061//26S proteasome regulatory subunit T1+ko03050//Proteasome+ko05169//Epstein-Barr virus infection;K03061//26S proteasome regulatory subunit T1+ko03050//Proteasome+ko05169//Epstein-Barr virus infection;K03061//26S proteasome regulatory subunit T1+ko03050//Proteasome+ko05169//Epstein-Barr virus infection;K03061//26S proteasome regulatory subunit T1+ko03050//Proteasome+ko05169//Epstein-Barr vir…
CL2617.Contig1_All	ko04140//Autophagy - animal	Transport and catabolism	Cellular Processes	Novel_gene	4403	2.01	2.19	2.43	5.47	6.39	3.5	1.2143	8.3929e-109	1.41585e-109		uncharacterized threonine-rich GPI-anchored glycoprotein PJ4664.02 isoform X1 [Zootermopsis nevadensis] >XP_021926228.1 uncharacterized threonine-rich GPI-anchored glycoprotein PJ4664.02 isoform X1 [Zootermopsis nevadensis] >XP_021926244.1 uncharacterized threonine-rich GPI-anchored glycoprotein PJ4664.02 isoform X1 [Zootermopsis nevadensis]	Spt20 family	[K] LSE3732 H Transcription factor	Uncharacterized protein DDB_G0285291 OS=Dictyostelium discoideum GN=DDB_G0285291 PE=4 SV=1			K21245//transcription factor SPT20 homolog+ko04140//Autophagy - animal;K21245//transcription factor SPT20 homolog+ko04140//Autophagy - animal;K21245//transcription factor SPT20 homolog+ko04140//Autophagy - animal;K21245//transcription factor SPT20 homolog+ko04140//Autophagy - animal
CL2621.Contig1_All	ko01100//Metabolic pathways;ko00561//Glycerolipid metabolism;ko04923//Regulation of lipolysis in adipocytes;ko04714//Thermogenesis	Lipid metabolism;Global and overview maps;Endocrine system;Environmental adaptation	Organismal Systems;Metabolism	Novel_gene	1253	2.07	2	1.66	5.89	5.71	4.87	1.5324	6.26048e-46	2.24493e-46		Mitochondrial sodium/hydrogen exchanger NHA2 [Zootermopsis nevadensis]	Sodium/hydrogen exchanger family	[P] KOG3826 Na+/H+ antiporter	Sodium/hydrogen exchanger 9B1 OS=Mus musculus GN=Slc9b1 PE=1 SV=1			K16816//patatin-like phospholipase domain-containing protein 2 [EC:3.1.1.3]+ko04714//Thermogenesis+ko00561//Glycerolipid metabolism+ko01100//Metabolic pathways+ko04923//Regulation of lipolysis in adipocytes
CL266.Contig7_All	ko05130//Pathogenic Escherichia coli infection;ko04540//Gap junction;ko04210//Apoptosis;ko04530//Tight junction;ko04145//Phagosome	Transport and catabolism;Infectious diseases: Bacterial;Cell growth and death;Cellular community - eukaryotes	Cellular Processes;Human Diseases	Novel_gene	1740	5.1	6.08	5.67	5.21	17.01	12.34	1.02425	5.09098e-71	1.26334e-71	XR_001339510.1 PREDICTED: Trichogramma pretiosum MIP18 family protein CG30152 (LOC106657372), transcript variant X2, misc_RNA	PREDICTED: MIP18 family protein CG30152 [Amyelois transitella]	Domain of unknown function DUF59	[S] KOG3381 Uncharacterized conserved protein	MIP18 family protein FAM96A OS=Mus musculus GN=Fam96a PE=1 SV=1			K07374//tubulin alpha+ko04145//Phagosome+ko05130//Pathogenic Escherichia coli infection+ko04210//Apoptosis+ko04540//Gap junction+ko04530//Tight junction
CL2687.Contig1_All	ko00190//Oxidative phosphorylation;ko05012//Parkinson disease;ko05016//Huntington disease;ko05010//Alzheimer disease;ko04714//Thermogenesis;ko01100//Metabolic pathways	Neurodegenerative diseases;Energy metabolism;Global and overview maps;Environmental adaptation	Organismal Systems;Human Diseases;Metabolism	Novel_gene	445	4.17	3.19	4.44	29.22	34.21	25.42	2.92873	8.96493e-167	9.88093e-168		PREDICTED: ATP synthase subunit epsilon, mitochondrial-like isoform X2 [Bemisia tabaci]		[C] KOG3495 Mitochondrial F1F0-ATP synthase, subunit epsilon/ATP15	Protein stunted OS=Drosophila melanogaster GN=sun PE=1 SV=1	GO:0015986//ATP synthesis coupled proton transport;GO:0000275//mitochondrial proton-transporting ATP synthase complex, catalytic core F(1);GO:0046933//proton-transporting ATP synthase activity, rotational mechanism		K02135//F-type H+-transporting ATPase subunit epsilon+ko04714//Thermogenesis+ko00190//Oxidative phosphorylation+ko05010//Alzheimer disease+ko05012//Parkinson disease+ko05016//Huntington disease+ko01100//Metabolic pathways;K02135//F-type H+-transporting ATPase subunit epsilon+ko04714//Thermogenesis+ko00190//Oxidative phosphorylation+ko05010//Alzheimer disease+ko05012//Parkinson disease+ko05016//Hu…
CL2770.Contig39_All	ko03040//Spliceosome	Transcription	Genetic Information Processing	Novel_gene	2096	1.23	1.52	3.19	7.8	2.61	5.64	1.45266	6.70797e-71	1.66897e-71	XM_018464524.1 PREDICTED: Agrilus planipennis myelin expression factor 2 (LOC108733385), mRNA	PREDICTED: heterogeneous nuclear ribonucleoprotein M [Bemisia tabaci]	RNA recognition motif. (a.k.a. RRM, RBD, or RNP domain)	[A] KOG4212 RNA-binding protein hnRNP-M	Heterogeneous nuclear ribonucleoprotein M OS=Rattus norvegicus GN=Hnrnpm PE=1 SV=4		Others	K12887//heterogeneous nuclear ribonucleoprotein M+ko03040//Spliceosome;K12887//heterogeneous nuclear ribonucleoprotein M+ko03040//Spliceosome;K12887//heterogeneous nuclear ribonucleoprotein M+ko03040//Spliceosome;K12887//heterogeneous nuclear ribonucleoprotein M+ko03040//Spliceosome;K12887//heterogeneous nuclear ribonucleoprotein M+ko03040//Spliceosome
CL279.Contig4_All	ko04977//Vitamin digestion and absorption;ko01100//Metabolic pathways;ko04972//Pancreatic secretion;ko00561//Glycerolipid metabolism;ko04975//Fat digestion and absorption	Lipid metabolism;Digestive system;Global and overview maps	Metabolism;Organismal Systems	Novel_gene	1914	1.43	1.98	1.48	5.19	5.53	4.68	1.65793	2.79687e-74	6.68208e-75		PREDICTED: pancreatic triacylglycerol lipase [Harpegnathos saltator]	Lipase	[MOI] TWOG0490 Vitellogenin/Lipoprotein lipase/Triacylglyerol lipase	Inactive pancreatic lipase-related protein 1 OS=Mus musculus GN=Pnliprp1 PE=1 SV=2			K14073//pancreatic triacylglycerol lipase [EC:3.1.1.3]+ko04975//Fat digestion and absorption+ko04977//Vitamin digestion and absorption+ko04972//Pancreatic secretion+ko00561//Glycerolipid metabolism+ko01100//Metabolic pathways;K14073//pancreatic triacylglycerol lipase [EC:3.1.1.3]+ko04975//Fat digestion and absorption+ko04977//Vitamin digestion and absorption+ko04972//Pancreatic secretion+ko00561/…
CL2806.Contig1_All	ko04510//Focal adhesion;ko05132//Salmonella infection;ko04010//MAPK signaling pathway;ko05205//Proteoglycans in cancer	Signal transduction;Cellular community - eukaryotes;Cancers: Overview;Infectious diseases: Bacterial	Human Diseases;Cellular Processes;Environmental Information Processing	Novel_gene	2982	2.04	2.75	2.72	20.38	9.76	20.97	2.77592	0	0		PREDICTED: filamin-A [Bemisia tabaci]	Filamin/ABP280 repeat	[Z] KOG0518 Actin-binding cytoskeleton protein, filamin	Filamin-C OS=Rattus norvegicus GN=Flnc PE=1 SV=1			K04437//filamin+ko05132//Salmonella infection+ko04510//Focal adhesion+ko05205//Proteoglycans in cancer+ko04010//MAPK signaling pathway;K04437//filamin+ko05132//Salmonella infection+ko04510//Focal adhesion+ko05205//Proteoglycans in cancer+ko04010//MAPK signaling pathway;K04437//filamin+ko05132//Salmonella infection+ko04510//Focal adhesion+ko05205//Proteoglycans in cancer+ko04010//MAPK signaling pa…
CL281.Contig3_All	ko04341//Hedgehog signaling pathway - fly;ko04340//Hedgehog signaling pathway	Signal transduction	Environmental Information Processing	Novel_gene	1308	3.06	3.16	1.48	7.46	7.3	8.74	1.61459	5.96339e-73	1.44612e-73		PREDICTED: protein roadkill [Rhagoletis zephyria]	BTB/POZ domain	[DR] KOG1987 Speckle-type POZ protein SPOP and related proteins with TRAF, MATH and BTB/POZ domains	Speckle-type POZ protein A OS=Xenopus laevis GN=spop-a PE=2 SV=1	GO:0005634//nucleus;GO:0043161//proteasome-mediated ubiquitin-dependent protein catabolic process;GO:0030162//regulation of proteolysis;GO:0031625//ubiquitin protein ligase binding;GO:0042787//protein ubiquitination involved in ubiquitin-dependent protein catabolic process;GO:0005737//cytoplasm;GO:0019005//SCF ubiquitin ligase complex	TF_bZIP	K10523//speckle-type POZ protein+ko04341//Hedgehog signaling pathway - fly+ko04340//Hedgehog signaling pathway;K10523//speckle-type POZ protein+ko04341//Hedgehog signaling pathway - fly+ko04340//Hedgehog signaling pathway;K10523//speckle-type POZ protein+ko04341//Hedgehog signaling pathway - fly+ko04340//Hedgehog signaling pathway
CL2890.Contig1_All	ko00511//Other glycan degradation	Glycan biosynthesis and metabolism	Metabolism	Novel_gene	1877	2.16	1.62	1.37	5.46	5.7	3.22	1.49099	1.01615e-58	2.94794e-59		PREDICTED: cytosolic endo-beta-N-acetylglucosaminidase [Diuraphis noxia]	Glycosyl hydrolase family 85	[R] KOG2331 Predicted glycosylhydrolase	Cytosolic endo-beta-N-acetylglucosaminidase OS=Homo sapiens GN=ENGASE PE=1 SV=1	GO:0033925//mannosyl-glycoprotein endo-beta-N-acetylglucosaminidase activity;GO:0005737//cytoplasm		K01227//mannosyl-glycoprotein endo-beta-N-acetylglucosaminidase [EC:3.2.1.96]+ko00511//Other glycan degradation;K01227//mannosyl-glycoprotein endo-beta-N-acetylglucosaminidase [EC:3.2.1.96]+ko00511//Other glycan degradation;K01227//mannosyl-glycoprotein endo-beta-N-acetylglucosaminidase [EC:3.2.1.96]+ko00511//Other glycan degradation;K01227//mannosyl-glycoprotein endo-beta-N-acetylglucosaminidase…
CL302.Contig2_All	ko03460//Fanconi anemia pathway	Replication and repair	Genetic Information Processing	Novel_gene	2988	2.52	1.76	2.5	3.04	5.99	4.79	1.02167	2.41811e-50	8.05335e-51		structure-specific endonuclease subunit SLX4-like isoform X1 [Zootermopsis nevadensis]	Slx4 endonuclease		Structure-specific endonuclease subunit SLX4 OS=Mus musculus GN=Slx4 PE=1 SV=1			K10484//structure-specific endonuclease subunit SLX4 (BTB/POZ domain-containing protein 12)+ko03460//Fanconi anemia pathway;K10484//structure-specific endonuclease subunit SLX4 (BTB/POZ domain-containing protein 12)+ko03460//Fanconi anemia pathway;K10484//structure-specific endonuclease subunit SLX4 (BTB/POZ domain-containing protein 12)+ko03460//Fanconi anemia pathway;K10484//structure-specific …
CL3150.Contig1_All	ko04340//Hedgehog signaling pathway;ko04341//Hedgehog signaling pathway - fly	Signal transduction	Environmental Information Processing	Novel_gene	1523	1.7	1.45	1.22	5.68	3.48	5.78	1.78514	2.61061e-63	7.15648e-64		PREDICTED: speckle-type POZ protein-like [Aplysia californica] >XP_005095092.1 PREDICTED: speckle-type POZ protein-like [Aplysia californica]	BTB/POZ domain	[DR] KOG1987 Speckle-type POZ protein SPOP and related proteins with TRAF, MATH and BTB/POZ domains	Speckle-type POZ protein-like OS=Homo sapiens GN=SPOPL PE=1 SV=1	GO:0046330//positive regulation of JNK cascade;GO:0005634//nucleus;GO:0046331//lateral inhibition;GO:1901044//protein polyubiquitination involved in nucleus-associated proteasomal ubiquitin-dependent protein catabolic process;GO:0042067//establishment of ommatidial planar polarity;GO:0042803//protein homodimerization activity;GO:0045879//negative regulation of smoothened signaling pathway;GO:0043…	ZBTB	K10523//speckle-type POZ protein+ko04341//Hedgehog signaling pathway - fly+ko04340//Hedgehog signaling pathway;K10523//speckle-type POZ protein+ko04341//Hedgehog signaling pathway - fly+ko04340//Hedgehog signaling pathway;K10523//speckle-type POZ protein+ko04341//Hedgehog signaling pathway - fly+ko04340//Hedgehog signaling pathway;K10523//speckle-type POZ protein+ko04341//Hedgehog signaling pathw…
CL320.Contig4_All	ko00520//Amino sugar and nucleotide sugar metabolism;ko01100//Metabolic pathways;ko00051//Fructose and mannose metabolism	Carbohydrate metabolism;Global and overview maps	Metabolism	Novel_gene	3120	10.81	4.2	10.3	24.03	31.93	29.27	1.75218	0	0		probable phosphomannomutase isoform X1 [Zootermopsis nevadensis]	Eukaryotic phosphomannomutase	[I] KOG3189 Phosphomannomutase	Phosphomannomutase 2 OS=Macaca fascicularis GN=PMM2 PE=2 SV=1	GO:0004615//phosphomannomutase activity;GO:0005737//cytoplasm;GO:0009298//GDP-mannose biosynthetic process	MBD	K17497//phosphomannomutase [EC:5.4.2.8]+ko00051//Fructose and mannose metabolism+ko00520//Amino sugar and nucleotide sugar metabolism+ko01100//Metabolic pathways;K17497//phosphomannomutase [EC:5.4.2.8]+ko00051//Fructose and mannose metabolism+ko00520//Amino sugar and nucleotide sugar metabolism+ko01100//Metabolic pathways;K17497//phosphomannomutase [EC:5.4.2.8]+ko00051//Fructose and mannose metab…
CL3215.Contig3_All	ko05202//Transcriptional misregulation in cancer	Cancers: Overview	Human Diseases	Novel_gene	4077	1.23	2.31	3.32	2.27	6.26	5.43	1.01519	2.03045e-68	5.20634e-69		PREDICTED: uncharacterized protein LOC105146527 isoform X1 [Acromyrmex echinatior] >EGI65098.1 Protein suppressor of sable [Acromyrmex echinatior]	Nitrile hydratase, alpha chain	[A] KOG1040 Polyadenylation factor I complex, subunit, Yth1 (CPSF subunit)	Zinc finger CCCH domain-containing protein 6 OS=Homo sapiens GN=ZC3H6 PE=1 SV=2	GO:0046872//metal ion binding		K09566//peptidyl-prolyl isomerase G (cyclophilin G) [EC:5.2.1.8];K15187//YEATS domain-containing protein 1/3+ko05202//Transcriptional misregulation in cancer;K15076//elongin-A;K18626//trichohyalin;K15187//YEATS domain-containing protein 1/3+ko05202//Transcriptional misregulation in cancer
CL3270.Contig1_All	ko03040//Spliceosome	Transcription	Genetic Information Processing	Novel_gene	3197	1.96	2.4	2.39	7.34	12.14	8.29	2.03629	1.23756e-295	7.66752e-297	XM_014440933.1 PREDICTED: Microplitis demolitor U2 snRNP-associated SURP motif-containing protein (LOC103568299), mRNA	U2 snRNP-associated SURP motif-containing protein [Nilaparvata lugens]	Surp module	[R] KOG0151 Predicted splicing regulator, contains RRM, SWAP and RPR domains	U2 snRNP-associated SURP motif-containing protein OS=Homo sapiens GN=U2SURP PE=1 SV=2			K12842//U2-associated protein SR140+ko03040//Spliceosome;K12842//U2-associated protein SR140+ko03040//Spliceosome;K12842//U2-associated protein SR140+ko03040//Spliceosome;K12842//U2-associated protein SR140+ko03040//Spliceosome;K12842//U2-associated protein SR140+ko03040//Spliceosome
CL3306.Contig1_All	ko01100//Metabolic pathways;ko00563//Glycosylphosphatidylinositol (GPI)-anchor biosynthesis	Global and overview maps;Glycan biosynthesis and metabolism	Metabolism	Novel_gene	2595	1.15	3.08	2.58	3.79	9.04	7.23	1.54898	1.95481e-118	3.04696e-119	XM_011636424.1 PREDICTED: Pogonomyrmex barbatus GPI transamidase component PIG-T (LOC105425583), mRNA	PREDICTED: GPI transamidase component PIG-T [Bemisia tabaci]	Gpi16 subunit, GPI transamidase component	[MO] KOG2407 GPI transamidase complex, GPI16/PIG-T component, involved in glycosylphosphatidylinositol anchor biosynthesis	GPI transamidase component PIG-T OS=Homo sapiens GN=PIGT PE=1 SV=1			K05292//phosphatidylinositol glycan, class T+ko00563//Glycosylphosphatidylinositol (GPI)-anchor biosynthesis+ko01100//Metabolic pathways;K05292//phosphatidylinositol glycan, class T+ko00563//Glycosylphosphatidylinositol (GPI)-anchor biosynthesis+ko01100//Metabolic pathways;K05292//phosphatidylinositol glycan, class T+ko00563//Glycosylphosphatidylinositol (GPI)-anchor biosynthesis+ko01100//Metabol…
CL3341.Contig2_All	ko05014//Amyotrophic lateral sclerosis (ALS);ko05410//Hypertrophic cardiomyopathy (HCM);ko05414//Dilated cardiomyopathy (DCM)	Neurodegenerative diseases;Cardiovascular diseases	Human Diseases	Novel_gene	2851	3.03	2.45	13.62	11.28	41.15	44.32	2.33181	0	0		PREDICTED: A-agglutinin anchorage subunit-like [Lates calcarifer]	Cytidylyltransferase family	[K] KOG0260 RNA polymerase II, large subunit	Neurofilament heavy polypeptide OS=Rattus norvegicus GN=Nefh PE=1 SV=4		zf-C2H2	K12567//titin [EC:2.7.11.1]+ko05414//Dilated cardiomyopathy (DCM)+ko05410//Hypertrophic cardiomyopathy (HCM);K04574//neurofilament heavy polypeptide+ko05014//Amyotrophic lateral sclerosis (ALS);K04574//neurofilament heavy polypeptide+ko05014//Amyotrophic lateral sclerosis (ALS);K04574//neurofilament heavy polypeptide+ko05014//Amyotrophic lateral sclerosis (ALS)
CL3350.Contig2_All	ko04142//Lysosome;ko04310//Wnt signaling pathway	Signal transduction;Transport and catabolism	Environmental Information Processing;Cellular Processes	Novel_gene	2080	2.38	1.49	1.73	4.97	4.75	5.66	1.46258	1.46762e-67	3.80465e-68		PREDICTED: FACT complex subunit spt16 isoform X1 [Megachile rotundata]	FACT complex subunit SPT16 N-terminal lobe domain	[E] KOG1189 Global transcriptional regulator, cell division control protein	FACT complex subunit spt-16 OS=Caenorhabditis briggsae GN=spt-16 PE=3 SV=1			K04494//chromodomain helicase DNA binding protein 8 [EC:3.6.4.12]+ko04310//Wnt signaling pathway;K12397//AP-3 complex subunit beta+ko04142//Lysosome;K08818//cell division cycle 2-like [EC:2.7.11.22];K18646//acidic leucine-rich nuclear phosphoprotein 32 family member A/C/D;K18646//acidic leucine-rich nuclear phosphoprotein 32 family member A/C/D
CL3382.Contig2_All	ko00053//Ascorbate and aldarate metabolism;ko00983//Drug metabolism - other enzymes;ko00980//Metabolism of xenobiotics by cytochrome P450;ko05204//Chemical carcinogenesis;ko00860//Porphyrin and chlorophyll metabolism;ko00982//Drug metabolism - cytochrome P450;ko00830//Retinol metabolism;ko00140//Steroid hormone biosynthesis;ko00040//Pentose and glucuronate interconversions;ko01100//Metabolic path…	Carbohydrate metabolism;Cancers: Overview;Xenobiotics biodegradation and metabolism;Metabolism of cofactors and vitamins;Global and overview maps;Lipid metabolism	Metabolism;Human Diseases	Novel_gene	2013	3.11	3.22	2.74	8.32	9.14	7.92	1.48529	3.62798e-109	6.10447e-110		UDP-glucuronosyltransferase 2B15-like isoform X3 [Myzus persicae]	UDP-glucoronosyl and UDP-glucosyl transferase	[GC] KOG1192 UDP-glucuronosyl and UDP-glucosyl transferase	UDP-glucuronosyltransferase 2B37 OS=Rattus norvegicus GN=Ugt2b37 PE=2 SV=1			K00699//glucuronosyltransferase [EC:2.4.1.17]+ko00980//Metabolism of xenobiotics by cytochrome P450+ko00982//Drug metabolism - cytochrome P450+ko00983//Drug metabolism - other enzymes+ko00040//Pentose and glucuronate interconversions+ko00860//Porphyrin and chlorophyll metabolism+ko00053//Ascorbate and aldarate metabolism+ko00830//Retinol metabolism+ko05204//Chemical carcinogenesis+ko00140//Steroi…
CL3456.Contig3_All	ko03015//mRNA surveillance pathway;ko03013//RNA transport	Translation	Genetic Information Processing	Novel_gene	13823	2.17	3.86	1.62	7.23	5.78	6.13	1.32371	0	0	XM_015511462.1 PREDICTED: Diuraphis noxia protein split ends (LOC107163720), transcript variant X3, mRNA	PREDICTED: protein split ends isoform X3 [Camponotus floridanus]	SPOC domain	[R] KOG0112 Large RNA-binding protein (RRM superfamily)	Protein split ends OS=Drosophila melanogaster GN=spen PE=1 SV=2			K10779//transcriptional regulator ATRX [EC:3.6.4.12];K13171//serine/arginine repetitive matrix protein 1+ko03013//RNA transport+ko03015//mRNA surveillance pathway;K13171//serine/arginine repetitive matrix protein 1+ko03013//RNA transport+ko03015//mRNA surveillance pathway;K13171//serine/arginine repetitive matrix protein 1+ko03013//RNA transport+ko03015//mRNA surveillance pathway;K13171//serine/a…
CL3490.Contig1_All	ko04024//cAMP signaling pathway	Signal transduction	Environmental Information Processing	Novel_gene	1579	3.59	14.25	5.52	29.41	6.44	11.44	1.04227	2.9533e-92	5.78142e-93		transcription factor SOX-10 isoform X2 [Oryzias latipes]	fzo-like conserved region	[K] KOG0527 HMG-box transcription factor	Transcription factor SOX-8 OS=Homo sapiens GN=SOX8 PE=2 SV=1		HMG	K18435//transcription factor SOX9 (SOX group E)+ko04024//cAMP signaling pathway;K18435//transcription factor SOX9 (SOX group E)+ko04024//cAMP signaling pathway;K18435//transcription factor SOX9 (SOX group E)+ko04024//cAMP signaling pathway;K18435//transcription factor SOX9 (SOX group E)+ko04024//cAMP signaling pathway;K18435//transcription factor SOX9 (SOX group E)+ko04024//cAMP signaling pathway
CL3554.Contig2_All	ko05146//Amoebiasis;ko04657//IL-17 signaling pathway;ko05226//Gastric cancer	Immune system;Infectious diseases: Parasitic;Cancers: Specific types	Human Diseases;Organismal Systems	Novel_gene	4661	3.18	4.99	6.87	16.66	16.18	15.8	1.69735	0	0	XM_013478510.1 Eimeria maxima hypothetical protein, conserved partial mRNA	proteophosphoglycan ppg4 [Leishmania braziliensis MHOM/BR/75/M2904] >CAM43271.1 proteophosphoglycan ppg4 [Leishmania braziliensis MHOM/BR/75/M2904]	UBA/TS-N domain	[K] KOG1878 Nuclear receptor coregulator SMRT/SMRTER, contains Myb-like domains	Probable serine/threonine-protein kinase fhkB OS=Dictyostelium discoideum GN=fhkB PE=3 SV=1	GO:0010468//regulation of gene expression;GO:0003682//chromatin binding;GO:0016021//integral component of membrane	MYB	K22016//mucin-3/17;K10955//mucin-2+ko05226//Gastric cancer+ko05146//Amoebiasis;K22017//mucin-4;K21125//mucin-5AC+ko04657//IL-17 signaling pathway;K21125//mucin-5AC+ko04657//IL-17 signaling pathway
CL3554.Contig3_All	ko04657//IL-17 signaling pathway;ko05226//Gastric cancer;ko05146//Amoebiasis	Immune system;Cancers: Specific types;Infectious diseases: Parasitic	Human Diseases;Organismal Systems	Novel_gene	4900	23.78	33.73	15.4	58.14	61.95	58.86	1.29384	0	0	XM_013478510.1 Eimeria maxima hypothetical protein, conserved partial mRNA	proteophosphoglycan ppg4 [Leishmania braziliensis MHOM/BR/75/M2904] >CAM43271.1 proteophosphoglycan ppg4 [Leishmania braziliensis MHOM/BR/75/M2904]	UBA/TS-N domain	[K] KOG1878 Nuclear receptor coregulator SMRT/SMRTER, contains Myb-like domains	Probable serine/threonine-protein kinase fhkB OS=Dictyostelium discoideum GN=fhkB PE=3 SV=1	GO:0010468//regulation of gene expression;GO:0003682//chromatin binding;GO:0016021//integral component of membrane	MYB	K22016//mucin-3/17;K21125//mucin-5AC+ko04657//IL-17 signaling pathway;K10955//mucin-2+ko05226//Gastric cancer+ko05146//Amoebiasis;K21125//mucin-5AC+ko04657//IL-17 signaling pathway;K21125//mucin-5AC+ko04657//IL-17 signaling pathway
CL3558.Contig1_All	ko04145//Phagosome;ko04144//Endocytosis;ko04530//Tight junction	Transport and catabolism;Cellular community - eukaryotes	Cellular Processes	Novel_gene	3100	4.73	10.46	7.3	15.09	26.4	23.87	1.53129	0	0		WD repeat and FYVE domain-containing protein 2 [Zootermopsis nevadensis] >KDR10967.1 WD repeat and FYVE domain-containing protein 2 [Zootermopsis nevadensis]	WD domain, G-beta repeat	[S] KOG1409 Uncharacterized conserved protein, contains WD40 repeats and FYVE domains	WD repeat and FYVE domain-containing protein 1 OS=Bos taurus GN=WDFY1 PE=2 SV=1			K21108//blood vessel epicardial substance+ko04530//Tight junction;K12182//hepatocyte growth factor-regulated tyrosine kinase substrate+ko04144//Endocytosis+ko04145//Phagosome;K18643//katanin p80 WD40 repeat-containing subunit B1
CL3611.Contig1_All	ko04144//Endocytosis;ko05205//Proteoglycans in cancer;ko05200//Pathways in cancer;ko05220//Chronic myeloid leukemia;ko04012//ErbB signaling pathway;ko04910//Insulin signaling pathway;ko04120//Ubiquitin mediated proteolysis;ko05100//Bacterial invasion of epithelial cells	Signal transduction;Folding, sorting and degradation;Cancers: Overview;Endocrine system;Cancers: Specific types;Infectious diseases: Bacterial;Transport and catabolism	Organismal Systems;Cellular Processes;Human Diseases;Genetic Information Processing;Environmental Information Processing	Novel_gene	2653	1.42	4.12	4.45	12.4	16.48	16.99	2.19672	0	0	XM_018032697.1 PREDICTED: Ceratina calcarata E3 ubiquitin-protein ligase CBL (LOC108629821), mRNA	PREDICTED: E3 ubiquitin-protein ligase CBL-B isoform X1 [Halyomorpha halys]	CBL proto-oncogene N-terminal domain 1	[V] KOG1785 Tyrosine kinase negative regulator CBL	E3 ubiquitin-protein ligase CBL OS=Homo sapiens GN=CBL PE=1 SV=2	GO:0005634//nucleus;GO:0007166//cell surface receptor signaling pathway;GO:0023051//regulation of signaling;GO:0004842//ubiquitin-protein transferase activity;GO:0016874//ligase activity;GO:0001784//phosphotyrosine residue binding;GO:0005509//calcium ion binding;GO:0004871//signal transducer activity		K04707//E3 ubiquitin-protein ligase CBL [EC:2.3.2.27]+ko04144//Endocytosis+ko04910//Insulin signaling pathway+ko05100//Bacterial invasion of epithelial cells+ko04120//Ubiquitin mediated proteolysis+ko05200//Pathways in cancer+ko05205//Proteoglycans in cancer+ko04012//ErbB signaling pathway+ko05220//Chronic myeloid leukemia;K04707//E3 ubiquitin-protein ligase CBL [EC:2.3.2.27]+ko04144//Endocytosis…
CL3691.Contig1_All	ko00790//Folate biosynthesis;ko01100//Metabolic pathways;ko01523//Antifolate resistance	Global and overview maps;Drug resistance: Antineoplastic;Metabolism of cofactors and vitamins	Metabolism;Human Diseases	Novel_gene	1671	1.57	2.21	1.63	3.34	4.77	3.29	1.07618	1.27099e-25	7.04156e-26		PREDICTED: folylpolyglutamate synthase, mitochondrial-like isoform X3 [Bemisia tabaci]	Mur ligase family, glutamate ligase domain	[H] KOG2525 Folylpolyglutamate synthase	Folylpolyglutamate synthase, mitochondrial OS=Homo sapiens GN=FPGS PE=1 SV=3			K01930//folylpolyglutamate synthase [EC:6.3.2.17]+ko01523//Antifolate resistance+ko01100//Metabolic pathways+ko00790//Folate biosynthesis;K01930//folylpolyglutamate synthase [EC:6.3.2.17]+ko01523//Antifolate resistance+ko01100//Metabolic pathways+ko00790//Folate biosynthesis;K01930//folylpolyglutamate synthase [EC:6.3.2.17]+ko01523//Antifolate resistance+ko01100//Metabolic pathways+ko00790//Folat…
CL3716.Contig2_All	ko05110//Vibrio cholerae infection	Infectious diseases: Bacterial	Human Diseases	Novel_gene	973	8.96	8.49	6.17	22.54	21.54	20.67	1.46243	3.67758e-125	5.41244e-126		PREDICTED: ER lumen protein-retaining receptor [Linepithema humile]	ER lumen protein retaining receptor	[U] KOG3106 ER lumen protein retaining receptor	ER lumen protein-retaining receptor 3 OS=Xenopus tropicalis GN=kdelr3 PE=2 SV=1	GO:0046923//ER retention sequence binding;GO:0016021//integral component of membrane;GO:0005789//endoplasmic reticulum membrane;GO:0015031//protein transport;GO:0006621//protein retention in ER lumen	zf-C2H2	K10949//ER lumen protein retaining receptor+ko05110//Vibrio cholerae infection;K10949//ER lumen protein retaining receptor+ko05110//Vibrio cholerae infection;K10949//ER lumen protein retaining receptor+ko05110//Vibrio cholerae infection;K10949//ER lumen protein retaining receptor+ko05110//Vibrio cholerae infection;K10949//ER lumen protein retaining receptor+ko05110//Vibrio cholerae infection
CL3716.Contig4_All	ko05110//Vibrio cholerae infection	Infectious diseases: Bacterial	Human Diseases	Novel_gene	1121	3.43	2.27	2.09	21.56	27.39	27.36	3.29386	0	0		PREDICTED: ER lumen protein-retaining receptor [Linepithema humile]	ER lumen protein retaining receptor	[U] KOG3106 ER lumen protein retaining receptor	ER lumen protein-retaining receptor 3 OS=Xenopus tropicalis GN=kdelr3 PE=2 SV=1	GO:0046923//ER retention sequence binding;GO:0016021//integral component of membrane;GO:0005789//endoplasmic reticulum membrane;GO:0015031//protein transport;GO:0006621//protein retention in ER lumen	zf-C2H2	K10949//ER lumen protein retaining receptor+ko05110//Vibrio cholerae infection;K10949//ER lumen protein retaining receptor+ko05110//Vibrio cholerae infection;K10949//ER lumen protein retaining receptor+ko05110//Vibrio cholerae infection;K10949//ER lumen protein retaining receptor+ko05110//Vibrio cholerae infection;K10949//ER lumen protein retaining receptor+ko05110//Vibrio cholerae infection
CL372.Contig2_All	ko03320//PPAR signaling pathway	Endocrine system	Organismal Systems	Novel_gene	2568	2.09	1.51	7.71	26.25	128.15	69.74	4.29678	0	0	XM_019050931.1 PREDICTED: Bemisia tabaci polyubiquitin-A (LOC109036602), mRNA	polyubiquitin-C-like [Helicoverpa armigera]	Ubiquitin family	[OR] KOG0001 Ubiquitin and ubiquitin-like proteins	Polyubiquitin-C OS=Rattus norvegicus GN=Ubc PE=1 SV=1			K08770//ubiquitin C+ko03320//PPAR signaling pathway;K08770//ubiquitin C+ko03320//PPAR signaling pathway;K08770//ubiquitin C+ko03320//PPAR signaling pathway;K08770//ubiquitin C+ko03320//PPAR signaling pathway;K08770//ubiquitin C+ko03320//PPAR signaling pathway
CL3807.Contig2_All	ko03008//Ribosome biogenesis in eukaryotes	Translation	Genetic Information Processing	Novel_gene	1110	10.16	9.87	6.25	19.5	19.57	17.24	1.10509	9.77161e-82	2.1625e-82		PREDICTED: U3 small nucleolar ribonucleoprotein protein IMP3 [Nasonia vitripennis]	S4 domain	[A] KOG4655 U3 small nucleolar ribonucleoprotein (snoRNP) component	U3 small nucleolar ribonucleoprotein protein IMP3 OS=Mus musculus GN=Imp3 PE=2 SV=1	GO:0030515//snoRNA binding;GO:0032040//small-subunit processome;GO:0034457//Mpp10 complex;GO:0005622//intracellular;GO:0006364//rRNA processing;GO:0019843//rRNA binding		K14560//U3 small nucleolar ribonucleoprotein protein IMP3+ko03008//Ribosome biogenesis in eukaryotes;K14560//U3 small nucleolar ribonucleoprotein protein IMP3+ko03008//Ribosome biogenesis in eukaryotes;K14560//U3 small nucleolar ribonucleoprotein protein IMP3+ko03008//Ribosome biogenesis in eukaryotes;K14560//U3 small nucleolar ribonucleoprotein protein IMP3+ko03008//Ribosome biogenesis in eukary…
CL3825.Contig1_All	ko04014//Ras signaling pathway;ko05170//Human immunodeficiency virus 1 infection;ko05167//Kaposi sarcoma-associated herpesvirus infection;ko05168//Herpes simplex infection;ko04622//RIG-I-like receptor signaling pathway;ko04623//Cytosolic DNA-sensing pathway;ko04137//Mitophagy - animal;ko04657//IL-17 signaling pathway;ko05165//Human papillomavirus infection;ko05162//Measles;ko05161//Hepatitis B;ko…	Signal transduction;Immune system;Transport and catabolism;Infectious diseases: Viral	Environmental Information Processing;Organismal Systems;Cellular Processes;Human Diseases	Novel_gene	3404	1.8	3.32	3.77	7.2	4.79	6.15	1.03763	2.23153e-77	5.17134e-78	XM_005184106.3 PREDICTED: Musca domestica serine/threonine-protein kinase TBK1 (LOC101896529), mRNA	serine/threonine-protein kinase TBK1 isoform X2 [Nilaparvata lugens]	Protein kinase domain	[T] KOG4250 TANK binding protein kinase TBK1	Inhibitor of nuclear factor kappa-B kinase subunit epsilon OS=Homo sapiens GN=IKBKE PE=1 SV=1	GO:0005524//ATP binding;GO:0004672//protein kinase activity		K05410//TANK-binding kinase 1 [EC:2.7.11.10]+ko05170//Human immunodeficiency virus 1 infection+ko04657//IL-17 signaling pathway+ko04137//Mitophagy - animal+ko04621//NOD-like receptor signaling pathway+ko04620//Toll-like receptor signaling pathway+ko04623//Cytosolic DNA-sensing pathway+ko04622//RIG-I-like receptor signaling pathway+ko04014//Ras signaling pathway+ko05161//Hepatitis B+ko05160//Hepat…
CL3963.Contig10_All	ko04211//Longevity regulating pathway;ko04136//Autophagy - other;ko04140//Autophagy - animal	Transport and catabolism;Aging	Cellular Processes;Organismal Systems	Novel_gene	2735	2.76	1.92	1.8	10.03	11.12	8.4	2.19276	1.70643e-295	1.06096e-296		autophagy-related protein 13 homolog isoform X1 [Athalia rosae]	Autophagy-related protein 13	[S] KOG3874 Uncharacterized conserved protein	Autophagy-related protein 13 OS=Mus musculus GN=Atg13 PE=1 SV=2			K08331//autophagy-related protein 13+ko04140//Autophagy - animal+ko04211//Longevity regulating pathway+ko04136//Autophagy - other;K08331//autophagy-related protein 13+ko04140//Autophagy - animal+ko04211//Longevity regulating pathway+ko04136//Autophagy - other;K08331//autophagy-related protein 13+ko04140//Autophagy - animal+ko04211//Longevity regulating pathway+ko04136//Autophagy - other;K08331//a…
CL3963.Contig6_All	ko04211//Longevity regulating pathway;ko04140//Autophagy - animal;ko04136//Autophagy - other	Transport and catabolism;Aging	Organismal Systems;Cellular Processes	Novel_gene	4155	2.94	2.43	2.26	5.71	6.71	3.97	1.10653	1.59247e-94	3.03609e-95		autophagy-related protein 13 homolog isoform X1 [Athalia rosae]	Sugar (and other) transporter	[S] KOG3874 Uncharacterized conserved protein	Autophagy-related protein 13 OS=Mus musculus GN=Atg13 PE=1 SV=2			K08331//autophagy-related protein 13+ko04140//Autophagy - animal+ko04211//Longevity regulating pathway+ko04136//Autophagy - other;K08331//autophagy-related protein 13+ko04140//Autophagy - animal+ko04211//Longevity regulating pathway+ko04136//Autophagy - other;K08331//autophagy-related protein 13+ko04140//Autophagy - animal+ko04211//Longevity regulating pathway+ko04136//Autophagy - other;K08331//a…
CL4016.Contig1_All	ko00600//Sphingolipid metabolism;ko01100//Metabolic pathways	Lipid metabolism;Global and overview maps	Metabolism	Novel_gene	2722	2.75	2	1.09	9.56	12.52	10.41	2.47457	0	0		3-ketodihydrosphingosine reductase isoform X3 [Zootermopsis nevadensis] >KDR24480.1 3-ketodihydrosphingosine reductase [Zootermopsis nevadensis]	short chain dehydrogenase	[Q] KOG1210 Predicted 3-ketosphinganine reductase	3-ketodihydrosphingosine reductase OS=Homo sapiens GN=KDSR PE=1 SV=1			K04708//3-dehydrosphinganine reductase [EC:1.1.1.102]+ko00600//Sphingolipid metabolism+ko01100//Metabolic pathways;K04708//3-dehydrosphinganine reductase [EC:1.1.1.102]+ko00600//Sphingolipid metabolism+ko01100//Metabolic pathways;K04708//3-dehydrosphinganine reductase [EC:1.1.1.102]+ko00600//Sphingolipid metabolism+ko01100//Metabolic pathways;K04708//3-dehydrosphinganine reductase [EC:1.1.1.102]+…
CL4021.Contig5_All	ko01212//Fatty acid metabolism;ko00280//Valine, leucine and isoleucine degradation;ko00640//Propanoate metabolism;ko01200//Carbon metabolism;ko01100//Metabolic pathways;ko00071//Fatty acid degradation;ko03320//PPAR signaling pathway;ko00410//beta-Alanine metabolism	Lipid metabolism;Global and overview maps;Carbohydrate metabolism;Endocrine system;Metabolism of other amino acids;Amino acid metabolism	Organismal Systems;Metabolism	Novel_gene	1825	12.88	16.49	14.32	32.8	31.48	38.73	1.24004	1.10934e-300	6.75251e-302		PREDICTED: probable medium-chain specific acyl-CoA dehydrogenase, mitochondrial [Tribolium castaneum] >EEZ99771.1 putative medium-chain specific acyl-CoA dehydrogenase, mitochondrial-like Protein [Tribolium castaneum]	Acyl-CoA dehydrogenase, C-terminal domain	[I] KOG0140 Medium-chain acyl-CoA dehydrogenase	Probable medium-chain specific acyl-CoA dehydrogenase, mitochondrial OS=Drosophila melanogaster GN=CG12262 PE=2 SV=1	GO:0006635//fatty acid beta-oxidation;GO:0050660//flavin adenine dinucleotide binding;GO:0003995//acyl-CoA dehydrogenase activity;GO:0070991//medium-chain-acyl-CoA dehydrogenase activity;GO:0005739//mitochondrion		K00249//acyl-CoA dehydrogenase [EC:1.3.8.7]+ko00410//beta-Alanine metabolism+ko03320//PPAR signaling pathway+ko01200//Carbon metabolism+ko00640//Propanoate metabolism+ko00280//Valine, leucine and isoleucine degradation+ko01100//Metabolic pathways+ko01212//Fatty acid metabolism+ko00071//Fatty acid degradation;K00249//acyl-CoA dehydrogenase [EC:1.3.8.7]+ko00410//beta-Alanine metabolism+ko03320//PPA…
CL4021.Contig6_All	ko00640//Propanoate metabolism;ko01200//Carbon metabolism;ko00280//Valine, leucine and isoleucine degradation;ko01212//Fatty acid metabolism;ko03320//PPAR signaling pathway;ko00071//Fatty acid degradation;ko01100//Metabolic pathways;ko00410//beta-Alanine metabolism	Carbohydrate metabolism;Global and overview maps;Amino acid metabolism;Metabolism of other amino acids;Lipid metabolism;Endocrine system	Metabolism;Organismal Systems	Novel_gene	2028	2.96	2.48	4.59	8.05	7.31	5.59	1.07181	1.45879e-55	4.46516e-56		PREDICTED: probable medium-chain specific acyl-CoA dehydrogenase, mitochondrial [Tribolium castaneum] >EEZ99771.1 putative medium-chain specific acyl-CoA dehydrogenase, mitochondrial-like Protein [Tribolium castaneum]	Acyl-CoA dehydrogenase, C-terminal domain	[I] KOG0140 Medium-chain acyl-CoA dehydrogenase	Probable medium-chain specific acyl-CoA dehydrogenase, mitochondrial OS=Drosophila melanogaster GN=CG12262 PE=2 SV=1	GO:0006635//fatty acid beta-oxidation;GO:0050660//flavin adenine dinucleotide binding;GO:0003995//acyl-CoA dehydrogenase activity;GO:0070991//medium-chain-acyl-CoA dehydrogenase activity;GO:0005739//mitochondrion		K00249//acyl-CoA dehydrogenase [EC:1.3.8.7]+ko00410//beta-Alanine metabolism+ko03320//PPAR signaling pathway+ko01200//Carbon metabolism+ko00640//Propanoate metabolism+ko00280//Valine, leucine and isoleucine degradation+ko01100//Metabolic pathways+ko01212//Fatty acid metabolism+ko00071//Fatty acid degradation;K00249//acyl-CoA dehydrogenase [EC:1.3.8.7]+ko00410//beta-Alanine metabolism+ko03320//PPA…
CL4061.Contig1_All	ko04621//NOD-like receptor signaling pathway	Immune system	Organismal Systems	Novel_gene	2218	3.54	2.58	2.65	8.34	7.38	7.47	1.4095	2.6242e-102	4.67507e-103	XM_014753247.1 PREDICTED: Polistes canadensis PH and SEC7 domain-containing protein 2 (LOC106789166), transcript variant X13, mRNA	PREDICTED: protein LAP2 [Acyrthosiphon pisum]	Leucine rich repeat	[R] KOG0619 FOG: Leucine rich repeat	Leucine-rich repeat-containing protein 7 OS=Homo sapiens GN=LRRC7 PE=1 SV=1			K12796//erbb2-interacting protein+ko04621//NOD-like receptor signaling pathway;K12796//erbb2-interacting protein+ko04621//NOD-like receptor signaling pathway;K12796//erbb2-interacting protein+ko04621//NOD-like receptor signaling pathway;K12796//erbb2-interacting protein+ko04621//NOD-like receptor signaling pathway
CL4064.Contig1_All	ko04975//Fat digestion and absorption;ko00561//Glycerolipid metabolism	Digestive system;Lipid metabolism	Organismal Systems;Metabolism	Novel_gene	1165	10.69	5.56	6.59	16.15	19.16	13.36	1.09682	1.27375e-73	3.06393e-74		PREDICTED: 2-acylglycerol O-acyltransferase 2 [Tribolium castaneum] >XP_008201427.1 PREDICTED: 2-acylglycerol O-acyltransferase 2 [Tribolium castaneum] >XP_008201428.1 PREDICTED: 2-acylglycerol O-acyltransferase 2 [Tribolium castaneum] >XP_015840860.1 PREDICTED: 2-acylglycerol O-acyltransferase 2 [Tribolium castaneum] >EEZ98240.1 2-acylglycerol O-acyltransferase 2-like Protein [Tribolium castaneu…	Diacylglycerol acyltransferase	[I] KOG0831 Acyl-CoA:diacylglycerol acyltransferase (DGAT)	2-acylglycerol O-acyltransferase 1 OS=Bos taurus GN=MOGAT1 PE=2 SV=1	GO:0016021//integral component of membrane;GO:0016747//transferase activity, transferring acyl groups other than amino-acyl groups		K14457//2-acylglycerol O-acyltransferase 2 [EC:2.3.1.22]+ko04975//Fat digestion and absorption+ko00561//Glycerolipid metabolism;K14457//2-acylglycerol O-acyltransferase 2 [EC:2.3.1.22]+ko04975//Fat digestion and absorption+ko00561//Glycerolipid metabolism;K14457//2-acylglycerol O-acyltransferase 2 [EC:2.3.1.22]+ko04975//Fat digestion and absorption+ko00561//Glycerolipid metabolism;K14458//2-acylg…
CL4084.Contig1_All	ko04380//Osteoclast differentiation	Development	Organismal Systems	Novel_gene	4688	1.7	1.95	8.23	7.98	25.99	17.35	2.1026	0	0	XM_001984638.1 Drosophila grimshawi GH16603 (Dgri\GH16603), mRNA	PREDICTED: four and a half LIM domains protein 2 isoform X6 [Bemisia tabaci]	LIM domain	[TZR] KOG1704 FOG: LIM domain	Four and a half LIM domains protein 2 OS=Bos taurus GN=FHL2 PE=2 SV=1		Homeobox	K14380//four and a half LIM domains protein 2+ko04380//Osteoclast differentiation
CL4084.Contig2_All	ko04310//Wnt signaling pathway;ko04380//Osteoclast differentiation	Signal transduction;Development	Environmental Information Processing;Organismal Systems	Novel_gene	5320	1.36	4.77	2.53	17.44	7.78	8.55	1.97667	0	0	XM_001984638.1 Drosophila grimshawi GH16603 (Dgri\GH16603), mRNA	calponin homology and LIM domain-containing protein isoform X2 [Zootermopsis nevadensis]	LIM domain	[TZR] KOG1704 FOG: LIM domain	Four and a half LIM domains protein 2 OS=Bos taurus GN=FHL2 PE=2 SV=1	GO:0008270//zinc ion binding	Homeobox	K04511//prickle+ko04310//Wnt signaling pathway;K14380//four and a half LIM domains protein 2+ko04380//Osteoclast differentiation
CL4100.Contig2_All	ko05169//Epstein-Barr virus infection	Infectious diseases: Viral	Human Diseases	Novel_gene	2823	1.04	1.68	2.55	3.31	3.75	3.6	1.01479	7.66461e-37	3.2558e-37		PREDICTED: histone deacetylase complex subunit SAP30 homolog [Bemisia tabaci] >XP_018896901.1 PREDICTED: histone deacetylase complex subunit SAP30 homolog [Bemisia tabaci]	SAP30 zinc-finger		Histone deacetylase complex subunit SAP30 homolog OS=Aedes aegypti GN=AAEL000149 PE=3 SV=1	GO:0046872//metal ion binding;GO:0003677//DNA binding;GO:0005634//nucleus;GO:0006355//regulation of transcription, DNA-templated;GO:0006351//transcription, DNA-templated		K19202//histone deacetylase complex subunit SAP30+ko05169//Epstein-Barr virus infection;K19202//histone deacetylase complex subunit SAP30+ko05169//Epstein-Barr virus infection;K19202//histone deacetylase complex subunit SAP30+ko05169//Epstein-Barr virus infection;K19202//histone deacetylase complex subunit SAP30+ko05169//Epstein-Barr virus infection;K19202//histone deacetylase complex subunit SAP…
CL411.Contig3_All	ko00140//Steroid hormone biosynthesis	Lipid metabolism	Metabolism	Novel_gene	1122	9.25	17.44	13.02	20.23	34.31	37.38	1.20686	5.59573e-153	6.80612e-154		PREDICTED: sulfotransferase family cytosolic 1B member 1-like isoform X2 [Orussus abietinus]	Sulfotransferase domain	[R] KOG1584 Sulfotransferase	Sulfotransferase 1 family member D1 OS=Rattus norvegicus GN=Sult1d1 PE=2 SV=1			K01016//estrone sulfotransferase [EC:2.8.2.4]+ko00140//Steroid hormone biosynthesis;K01016//estrone sulfotransferase [EC:2.8.2.4]+ko00140//Steroid hormone biosynthesis;K01016//estrone sulfotransferase [EC:2.8.2.4]+ko00140//Steroid hormone biosynthesis;K01016//estrone sulfotransferase [EC:2.8.2.4]+ko00140//Steroid hormone biosynthesis
CL4117.Contig1_All	ko05206//MicroRNAs in cancer	Cancers: Overview	Human Diseases	Novel_gene	2363	1.74	4	3.79	6.16	10.25	8.29	1.36992	1.32244e-110	2.20071e-111		PREDICTED: NHL repeat-containing protein 2 [Bemisia tabaci]	NHL repeat	[O] KOG2177 Predicted E3 ubiquitin ligase	NHL repeat-containing protein 2 OS=Gallus gallus GN=NHLRC2 PE=2 SV=1	GO:0005623//cell;GO:0045454//cell redox homeostasis		K12035//tripartite motif-containing protein 71 [EC:2.3.2.27]+ko05206//MicroRNAs in cancer;K12035//tripartite motif-containing protein 71 [EC:2.3.2.27]+ko05206//MicroRNAs in cancer;K12035//tripartite motif-containing protein 71 [EC:2.3.2.27]+ko05206//MicroRNAs in cancer;K12035//tripartite motif-containing protein 71 [EC:2.3.2.27]+ko05206//MicroRNAs in cancer;K12035//tripartite motif-containing pro…
CL4149.Contig1_All	ko01212//Fatty acid metabolism;ko03320//PPAR signaling pathway;ko04920//Adipocytokine signaling pathway;ko01100//Metabolic pathways;ko00061//Fatty acid biosynthesis;ko00071//Fatty acid degradation	Global and overview maps;Lipid metabolism;Endocrine system	Organismal Systems;Metabolism	Novel_gene	3073	2.74	1.58	7.48	6.06	13.07	5.39	1.0541	2.59195e-95	4.91344e-96		PREDICTED: long-chain-fatty-acid--CoA ligase ACSBG2 isoform X1 [Polistes canadensis]	AMP-binding enzyme	[I] KOG1256 Long-chain acyl-CoA synthetases (AMP-forming)	Long-chain-fatty-acid--CoA ligase ACSBG2 OS=Gallus gallus GN=ACSBG2 PE=2 SV=2	GO:0008152//metabolic process;GO:0003824//catalytic activity		K15013//long-chain-fatty-acid--CoA ligase ACSBG [EC:6.2.1.3]+ko03320//PPAR signaling pathway+ko00061//Fatty acid biosynthesis+ko01100//Metabolic pathways+ko01212//Fatty acid metabolism+ko00071//Fatty acid degradation+ko04920//Adipocytokine signaling pathway;K15013//long-chain-fatty-acid--CoA ligase ACSBG [EC:6.2.1.3]+ko03320//PPAR signaling pathway+ko00061//Fatty acid biosynthesis+ko01100//Metabo…
CL415.Contig3_All	ko04341//Hedgehog signaling pathway - fly;ko04340//Hedgehog signaling pathway	Signal transduction	Environmental Information Processing	Novel_gene	4920	5.7	10.89	12.86	35.52	25.18	27.73	1.59411	0	0	XM_015748732.1 PREDICTED: Cephus cinctus protein roadkill (LOC107272003), transcript variant X8, mRNA	PREDICTED: protein roadkill isoform X3 [Tribolium castaneum]	BTB/POZ domain	[DR] KOG1987 Speckle-type POZ protein SPOP and related proteins with TRAF, MATH and BTB/POZ domains	Protein roadkill OS=Drosophila melanogaster GN=rdx PE=1 SV=2		Others	K10523//speckle-type POZ protein+ko04341//Hedgehog signaling pathway - fly+ko04340//Hedgehog signaling pathway;K10523//speckle-type POZ protein+ko04341//Hedgehog signaling pathway - fly+ko04340//Hedgehog signaling pathway;K10523//speckle-type POZ protein+ko04341//Hedgehog signaling pathway - fly+ko04340//Hedgehog signaling pathway;K10523//speckle-type POZ protein+ko04341//Hedgehog signaling pathw…
CL4169.Contig1_All	ko05202//Transcriptional misregulation in cancer;ko04919//Thyroid hormone signaling pathway;ko01522//Endocrine resistance	Endocrine system;Drug resistance: Antineoplastic;Cancers: Overview	Human Diseases;Organismal Systems	Novel_gene	4167	2.98	3.34	3.53	8.81	13.86	15.64	1.95336	0	0	XM_020854010.1 PREDICTED: Athalia rosae zinc finger protein 608-like (LOC105688915), mRNA	PREDICTED: PERQ amino acid-rich with GYF domain-containing protein CG11148, partial [Polistes canadensis]		[W] LSE0345 A 12S cruciferin seed storage protein/vicilin-like seed storage protein	Transcription factor SPT20 homolog OS=Dictyostelium discoideum GN=DDB_G0280065 PE=3 SV=1		zf-C2H2	K18730//PERQ amino acid-rich with GYF domain-containing protein;K18730//PERQ amino acid-rich with GYF domain-containing protein;K18730//PERQ amino acid-rich with GYF domain-containing protein;K04650//nuclear receptor co-repressor 1+ko01522//Endocrine resistance+ko04919//Thyroid hormone signaling pathway+ko05202//Transcriptional misregulation in cancer
CL439.Contig1_All	ko03008//Ribosome biogenesis in eukaryotes	Translation	Genetic Information Processing	Novel_gene	2346	4.36	6.37	6.49	11.59	36.43	20.77	1.98649	0	0	XM_019680863.1 PREDICTED: Aedes albopictus serine/threonine-protein kinase RIO1 (LOC109407710), mRNA	PREDICTED: serine/threonine-protein kinase RIO1-like [Bemisia tabaci]	RIO1 family	[TD] KOG2270 Serine/threonine protein kinase involved in cell cycle control	Serine/threonine-protein kinase RIO1 OS=Homo sapiens GN=RIOK1 PE=1 SV=2	GO:0004674//protein serine/threonine kinase activity;GO:0005524//ATP binding		K07178//RIO kinase 1 [EC:2.7.11.1]+ko03008//Ribosome biogenesis in eukaryotes;K07178//RIO kinase 1 [EC:2.7.11.1]+ko03008//Ribosome biogenesis in eukaryotes;K07178//RIO kinase 1 [EC:2.7.11.1]+ko03008//Ribosome biogenesis in eukaryotes;K07178//RIO kinase 1 [EC:2.7.11.1]+ko03008//Ribosome biogenesis in eukaryotes;K07178//RIO kinase 1 [EC:2.7.11.1]+ko03008//Ribosome biogenesis in eukaryotes
CL466.Contig9_All	ko00564//Glycerophospholipid metabolism;ko00981//Insect hormone biosynthesis;ko04725//Cholinergic synapse;ko00983//Drug metabolism - other enzymes	Xenobiotics biodegradation and metabolism;Lipid metabolism;Nervous system;Metabolism of terpenoids and polyketides	Organismal Systems;Metabolism	Novel_gene	5685	1.38	1.48	2.54	8.58	9.11	7.2	2.20703	0	0		PREDICTED: esterase E4 [Acyrthosiphon pisum]	Carboxylesterase family	[R] KOG1516 Carboxylesterase and related proteins	Esterase FE4 OS=Myzus persicae PE=1 SV=1	GO:0016787//hydrolase activity		K03927//carboxylesterase 2 [EC:3.1.1.1 3.1.1.84 3.1.1.56]+ko00983//Drug metabolism - other enzymes;K01049//acetylcholinesterase [EC:3.1.1.7]+ko04725//Cholinergic synapse+ko00564//Glycerophospholipid metabolism;K03927//carboxylesterase 2 [EC:3.1.1.1 3.1.1.84 3.1.1.56]+ko00983//Drug metabolism - other enzymes;K03927//carboxylesterase 2 [EC:3.1.1.1 3.1.1.84 3.1.1.56]+ko00983//Drug metabolism - other…
CL525.Contig3_All	ko01100//Metabolic pathways;ko05218//Melanoma;ko05215//Prostate cancer;ko05206//MicroRNAs in cancer;ko00562//Inositol phosphate metabolism;ko04510//Focal adhesion;ko04140//Autophagy - animal;ko04931//Insulin resistance;ko05166//Human T-cell leukemia virus 1 infection;ko04150//mTOR signaling pathway;ko04068//FoxO signaling pathway;ko05165//Human papillomavirus infection;ko01521//EGFR tyrosine kina…	Cancers: Specific types;Aging;Cancers: Overview;Drug resistance: Antineoplastic;Signal transduction;Infectious diseases: Viral;Carbohydrate metabolism;Endocrine and metabolic diseases;Global and overview maps;Cellular community - eukaryotes;Transport and catabolism;Cell growth and death	Metabolism;Human Diseases;Environmental Information Processing;Organismal Systems;Cellular Processes	Novel_gene	1938	5.62	13.6	12.36	32.85	31.76	34.9	1.65889	0	0		PREDICTED: phosphatidylinositol 3,4,5-trisphosphate 3-phosphatase and dual-specificity protein phosphatase PTEN isoform X2 [Halyomorpha halys]	C2 domain of PTEN tumour-suppressor protein	[TR] KOG2283 Clathrin coat dissociation kinase GAK/PTEN/Auxilin and related tyrosine phosphatases	Phosphatidylinositol 3,4,5-trisphosphate 3-phosphatase and dual-specificity protein phosphatase PTEN OS=Xenopus laevis GN=pten PE=2 SV=1			K01110//phosphatidylinositol-3,4,5-trisphosphate 3-phosphatase and dual-specificity protein phosphatase PTEN [EC:3.1.3.16 3.1.3.48 3.1.3.67]+ko04140//Autophagy - animal+ko05222//Small cell lung cancer+ko05225//Hepatocellular carcinoma+ko04510//Focal adhesion+ko04212//Longevity regulating pathway - worm+ko04218//Cellular senescence+ko04070//Phosphatidylinositol signaling system+ko04071//Sphingolip…
CL594.Contig2_All	ko00330//Arginine and proline metabolism;ko00410//beta-Alanine metabolism	Metabolism of other amino acids;Amino acid metabolism	Metabolism	Novel_gene	2117	2.19	1.89	1.49	5.09	3.42	4.5	1.23024	2.41809e-45	8.76034e-46		PREDICTED: peroxisomal N(1)-acetyl-spermine/spermidine oxidase isoform X1 [Bemisia tabaci]	Flavin containing amine oxidoreductase	[H] KOG0685 Flavin-containing amine oxidase	Peroxisomal N(1)-acetyl-spermine/spermidine oxidase OS=Homo sapiens GN=PAOX PE=1 SV=3	GO:0016491//oxidoreductase activity		K12259//spermine oxidase [EC:1.5.3.16 1.5.3.-]+ko00410//beta-Alanine metabolism+ko00330//Arginine and proline metabolism;K12259//spermine oxidase [EC:1.5.3.16 1.5.3.-]+ko00410//beta-Alanine metabolism+ko00330//Arginine and proline metabolism;K12259//spermine oxidase [EC:1.5.3.16 1.5.3.-]+ko00410//beta-Alanine metabolism+ko00330//Arginine and proline metabolism;K12259//spermine oxidase [EC:1.5.3.1…
CL598.Contig2_All	ko05226//Gastric cancer;ko05146//Amoebiasis	Cancers: Specific types;Infectious diseases: Parasitic	Human Diseases	Novel_gene	5827	3.99	6.45	6.02	8.4	16.23	12.26	1.15735	0	0		PREDICTED: mucin-2-like isoform X1 [Lates calcarifer]	Protein of unknown function (DUF1666)	[WV] KOG1216 von Willebrand factor and related coagulation proteins	Zonadhesin OS=Homo sapiens GN=ZAN PE=2 SV=4	GO:0008061//chitin binding;GO:0006030//chitin metabolic process;GO:0005576//extracellular region		K10955//mucin-2+ko05226//Gastric cancer+ko05146//Amoebiasis;K22017//mucin-4;K22023//mucin-6;K22023//mucin-6;K10955//mucin-2+ko05226//Gastric cancer+ko05146//Amoebiasis
CL626.Contig11_All	ko04142//Lysosome;ko00511//Other glycan degradation	Glycan biosynthesis and metabolism;Transport and catabolism	Metabolism;Cellular Processes	Novel_gene	2551	5.36	3.79	2.77	6.88	12.11	6.42	1.08922	2.69644e-86	5.65373e-87		lysosomal alpha-mannosidase-like [Myzus persicae]	Glycosyl hydrolases family 38 C-terminal domain	[G] KOG1959 Glycosyl hydrolase, family 38 - alpha-mannosidase	Lysosomal alpha-mannosidase OS=Bos taurus GN=MAN2B1 PE=1 SV=4			K12311//lysosomal alpha-mannosidase [EC:3.2.1.24]+ko04142//Lysosome+ko00511//Other glycan degradation;K12311//lysosomal alpha-mannosidase [EC:3.2.1.24]+ko04142//Lysosome+ko00511//Other glycan degradation;K12311//lysosomal alpha-mannosidase [EC:3.2.1.24]+ko04142//Lysosome+ko00511//Other glycan degradation;K12311//lysosomal alpha-mannosidase [EC:3.2.1.24]+ko04142//Lysosome+ko00511//Other glycan deg…
CL637.Contig3_All	ko01100//Metabolic pathways;ko04614//Renin-angiotensin system;ko04640//Hematopoietic cell lineage;ko00480//Glutathione metabolism	Metabolism of other amino acids;Endocrine system;Global and overview maps;Immune system	Organismal Systems;Metabolism	Novel_gene	2657	12.15	4.39	3.95	11.25	20.89	13.07	1.13604	1.27294e-169	1.38639e-170		PREDICTED: uncharacterized protein LOC105829585 [Monomorium pharaonis]	Peptidase family M1	[EO] KOG1046 Puromycin-sensitive aminopeptidase and related aminopeptidases	Aminopeptidase Ey OS=Gallus gallus GN=ANPEP PE=1 SV=2	GO:0008237//metallopeptidase activity;GO:0004177//aminopeptidase activity;GO:0008270//zinc ion binding;GO:0016021//integral component of membrane		K11140//aminopeptidase N [EC:3.4.11.2]+ko04640//Hematopoietic cell lineage+ko04614//Renin-angiotensin system+ko00480//Glutathione metabolism+ko01100//Metabolic pathways;K11140//aminopeptidase N [EC:3.4.11.2]+ko04640//Hematopoietic cell lineage+ko04614//Renin-angiotensin system+ko00480//Glutathione metabolism+ko01100//Metabolic pathways;K11140//aminopeptidase N [EC:3.4.11.2]+ko04640//Hematopoietic…
CL639.Contig3_All	ko03008//Ribosome biogenesis in eukaryotes	Translation	Genetic Information Processing	Novel_gene	6397	2.79	7.07	8.03	16.57	21.41	14.35	1.54758	0	0		Nuclear valosin-containing protein-like [Habropoda laboriosa]	ATPase family associated with various cellular activities (AAA)	[O] KOG0733 Nuclear AAA ATPase (VCP subfamily)	Nuclear valosin-containing protein-like OS=Mus musculus GN=Nvl PE=1 SV=1			K14571//ribosome biogenesis ATPase+ko03008//Ribosome biogenesis in eukaryotes;K14571//ribosome biogenesis ATPase+ko03008//Ribosome biogenesis in eukaryotes;K14571//ribosome biogenesis ATPase+ko03008//Ribosome biogenesis in eukaryotes;K14571//ribosome biogenesis ATPase+ko03008//Ribosome biogenesis in eukaryotes;K14571//ribosome biogenesis ATPase+ko03008//Ribosome biogenesis in eukaryotes
CL763.Contig1_All	ko04911//Insulin secretion;ko04950//Maturity onset diabetes of the young;ko04960//Aldosterone-regulated sodium reabsorption;ko04022//cGMP-PKG signaling pathway;ko04152//AMPK signaling pathway;ko04015//Rap1 signaling pathway;ko04931//Insulin resistance;ko04151//PI3K-Akt signaling pathway;ko04913//Ovarian steroidogenesis;ko04910//Insulin signaling pathway;ko04072//Phospholipase D signaling pathway;…	Cell motility;Endocrine and metabolic diseases;Cancers: Specific types;Endocrine system;Transport and catabolism;Aging;Excretory system;Cell growth and death;Signal transduction	Organismal Systems;Environmental Information Processing;Human Diseases;Cellular Processes	Novel_gene	1365	1.32	2.52	1.79	5.23	4.91	5.08	1.43926	1.69389e-42	6.45336e-43		PREDICTED: LIRP isoform X2 [Linepithema humile]	Insulin/IGF/Relaxin family		LIRP OS=Locusta migratoria PE=1 SV=2			K04526//insulin+ko04022//cGMP-PKG signaling pathway+ko04140//Autophagy - animal+ko04810//Regulation of actin cytoskeleton+ko04950//Maturity onset diabetes of the young+ko04211//Longevity regulating pathway+ko04213//Longevity regulating pathway - multiple species+ko04072//Phospholipase D signaling pathway+ko04917//Prolactin signaling pathway+ko04914//Progesterone-mediated oocyte maturation+ko04913…
CL799.Contig1_All	ko04140//Autophagy - animal;ko04022//cGMP-PKG signaling pathway;ko04920//Adipocytokine signaling pathway;ko04068//FoxO signaling pathway;ko04923//Regulation of lipolysis in adipocytes;ko04152//AMPK signaling pathway;ko04213//Longevity regulating pathway - multiple species;ko04211//Longevity regulating pathway;ko04910//Insulin signaling pathway;ko04930//Type II diabetes mellitus	Endocrine and metabolic diseases;Endocrine system;Signal transduction;Aging;Transport and catabolism	Cellular Processes;Environmental Information Processing;Organismal Systems;Human Diseases	Novel_gene	533	2.7	6.71	5.57	651.57	761.66	930.44	7.29914	0	0		hypothetical protein TcasGA2_TC007273 [Tribolium castaneum]	Keratin type II head	[M] LSE0601 A Pollen extensin-like protein (Pex)	Uncharacterized proline-rich protein (Fragment) OS=Owenia fusiformis PE=4 SV=1		zf-C2H2	K08023//latent transforming growth factor beta binding protein 2/3/4;K17446//insulin receptor substrate 4+ko04022//cGMP-PKG signaling pathway+ko04140//Autophagy - animal+ko04211//Longevity regulating pathway+ko04213//Longevity regulating pathway - multiple species+ko04910//Insulin signaling pathway+ko04930//Type II diabetes mellitus+ko04152//AMPK signaling pathway+ko04068//FoxO signaling pathway+…
CL897.Contig1_All	ko04068//FoxO signaling pathway;ko04110//Cell cycle;ko04914//Progesterone-mediated oocyte maturation;ko04114//Oocyte meiosis	Cell growth and death;Endocrine system;Signal transduction	Environmental Information Processing;Cellular Processes;Organismal Systems	Novel_gene	3155	1.1	1.55	1.22	4.01	8.12	4.38	2.08785	2.06708e-179	2.13224e-180	XM_012409543.2 PREDICTED: Athalia rosae serine/threonine-protein kinase polo (LOC105691208), transcript variant X1, mRNA	PREDICTED: serine/threonine-protein kinase polo isoform X1 [Bemisia tabaci]	Protein kinase domain	[D] KOG0575 Polo-like serine/threonine protein kinase	Serine/threonine-protein kinase PLK1 OS=Rattus norvegicus GN=Plk1 PE=2 SV=2	GO:0004674//protein serine/threonine kinase activity;GO:0005524//ATP binding		K06631//polo-like kinase 1 [EC:2.7.11.21]+ko04914//Progesterone-mediated oocyte maturation+ko04114//Oocyte meiosis+ko04110//Cell cycle+ko04068//FoxO signaling pathway;K06631//polo-like kinase 1 [EC:2.7.11.21]+ko04914//Progesterone-mediated oocyte maturation+ko04114//Oocyte meiosis+ko04110//Cell cycle+ko04068//FoxO signaling pathway;K06631//polo-like kinase 1 [EC:2.7.11.21]+ko04914//Progesterone-m…
CL910.Contig3_All	ko01100//Metabolic pathways;ko00534//Glycosaminoglycan biosynthesis - heparan sulfate / heparin	Global and overview maps;Glycan biosynthesis and metabolism	Metabolism	Novel_gene	1395	2.44	3.02	2.14	3.38	6.76	6.35	1.11282	9.64339e-32	4.59739e-32		PREDICTED: zinc finger CCHC domain-containing protein 4 [Anoplophora glabripennis]	Probable N6-adenine methyltransferase	[R] KOG4399 C2HC-type Zn-finger protein	Zinc finger CCHC domain-containing protein 4 OS=Mus musculus GN=Zcchc4 PE=2 SV=1	GO:0008168//methyltransferase activity;GO:0003676//nucleic acid binding		K02367//glucuronyl/N-acetylglucosaminyl transferase EXT2 [EC:2.4.1.224 2.4.1.225]+ko00534//Glycosaminoglycan biosynthesis - heparan sulfate / heparin+ko01100//Metabolic pathways
CL942.Contig3_All	ko04510//Focal adhesion;ko04810//Regulation of actin cytoskeleton;ko04921//Oxytocin signaling pathway;ko04270//Vascular smooth muscle contraction;ko05205//Proteoglycans in cancer;ko04022//cGMP-PKG signaling pathway;ko04611//Platelet activation;ko04024//cAMP signaling pathway	Circulatory system;Endocrine system;Cell motility;Cancers: Overview;Immune system;Signal transduction;Cellular community - eukaryotes	Environmental Information Processing;Cellular Processes;Human Diseases;Organismal Systems	Novel_gene	3428	4.77	9.77	2.94	11.01	14.55	13.31	1.14779	5.36509e-193	5.13183e-194		PREDICTED: protein phosphatase 1 regulatory subunit 12A-like isoform X6 [Bemisia tabaci]	Ankyrin repeats (many copies)	[OT] KOG0505 Myosin phosphatase, regulatory subunit	Protein phosphatase 1 regulatory subunit 12A OS=Gallus gallus GN=PPP1R12A PE=1 SV=1		RHD	K06270//protein phosphatase 1 regulatory subunit 12A+ko04024//cAMP signaling pathway+ko04022//cGMP-PKG signaling pathway+ko04810//Regulation of actin cytoskeleton+ko04510//Focal adhesion+ko04611//Platelet activation+ko05205//Proteoglycans in cancer+ko04270//Vascular smooth muscle contraction+ko04921//Oxytocin signaling pathway;K06270//protein phosphatase 1 regulatory subunit 12A+ko04024//cAMP sig…
CL943.Contig5_All	ko05146//Amoebiasis	Infectious diseases: Parasitic	Human Diseases	Novel_gene	1630	18.54	15.07	25.43	35.44	48.46	37.39	1.04077	5.15981e-237	3.98764e-238		serine protease inhibitor-like protein, partial [Maconellicoccus hirsutus]	Serpin (serine protease inhibitor)	[V] KOG2392 Serpin	Corticosteroid-binding globulin OS=Ursus arctos GN=Serpina6 PE=2 SV=1			K13963//serpin B+ko05146//Amoebiasis;K13963//serpin B+ko05146//Amoebiasis;K13963//serpin B+ko05146//Amoebiasis;K13963//serpin B+ko05146//Amoebiasis
CL966.Contig6_All	ko00230//Purine metabolism;ko01100//Metabolic pathways	Global and overview maps;Nucleotide metabolism	Metabolism	Novel_gene	2179	3.54	1.92	1.24	3.02	8.26	6.94	1.43263	2.37229e-80	5.33766e-81		hypothetical protein D910_07239 [Dendroctonus ponderosae]	SAICAR synthetase	[F] KOG2835 Phosphoribosylamidoimidazole-succinocarboxamide synthase	Multifunctional protein ADE2 OS=Mus musculus GN=Paics PE=1 SV=4	GO:0004639//phosphoribosylaminoimidazolesuccinocarboxamide synthase activity;GO:0006189//'de novo' IMP biosynthetic process		K01587//phosphoribosylaminoimidazole carboxylase / phosphoribosylaminoimidazole-succinocarboxamide synthase [EC:4.1.1.21 6.3.2.6]+ko00230//Purine metabolism+ko01100//Metabolic pathways;K01587//phosphoribosylaminoimidazole carboxylase / phosphoribosylaminoimidazole-succinocarboxamide synthase [EC:4.1.1.21 6.3.2.6]+ko00230//Purine metabolism+ko01100//Metabolic pathways;K01587//phosphoribosylaminoim…
CL973.Contig10_All	ko00140//Steroid hormone biosynthesis	Lipid metabolism	Metabolism	Novel_gene	2373	4.71	4.44	6.15	11.13	12.67	16.8	1.40697	1.93791e-189	1.89999e-190		PREDICTED: sulfotransferase 1C4-like [Nasonia vitripennis] >XP_008204338.1 PREDICTED: sulfotransferase 1C4-like [Nasonia vitripennis]	Sulfotransferase domain	[R] KOG1584 Sulfotransferase	Amine sulfotransferase OS=Oryctolagus cuniculus GN=SULT3A1 PE=1 SV=1			K01016//estrone sulfotransferase [EC:2.8.2.4]+ko00140//Steroid hormone biosynthesis;K01016//estrone sulfotransferase [EC:2.8.2.4]+ko00140//Steroid hormone biosynthesis;K01016//estrone sulfotransferase [EC:2.8.2.4]+ko00140//Steroid hormone biosynthesis;K01016//estrone sulfotransferase [EC:2.8.2.4]+ko00140//Steroid hormone biosynthesis
CL973.Contig3_All	ko00140//Steroid hormone biosynthesis	Lipid metabolism	Metabolism	Novel_gene	2419	18.36	24.2	13.29	43.96	73.37	65.55	1.70475	0	0		PREDICTED: sulfotransferase 1C4-like [Nasonia vitripennis] >XP_008204338.1 PREDICTED: sulfotransferase 1C4-like [Nasonia vitripennis]	Sulfotransferase domain	[R] KOG1584 Sulfotransferase	Amine sulfotransferase OS=Oryctolagus cuniculus GN=SULT3A1 PE=1 SV=1			K01016//estrone sulfotransferase [EC:2.8.2.4]+ko00140//Steroid hormone biosynthesis;K01016//estrone sulfotransferase [EC:2.8.2.4]+ko00140//Steroid hormone biosynthesis;K01016//estrone sulfotransferase [EC:2.8.2.4]+ko00140//Steroid hormone biosynthesis;K01016//estrone sulfotransferase [EC:2.8.2.4]+ko00140//Steroid hormone biosynthesis
Unigene11746_All	ko00981//Insect hormone biosynthesis	Metabolism of terpenoids and polyketides	Metabolism	Novel_gene	3305	5.25	2.36	3.8	6.41	11.93	9.62	1.28865	2.77117e-160	3.19288e-161		methyl farnesoate epoxidase-like [Zootermopsis nevadensis]	Cytochrome P450	[Q] KOG0156 Cytochrome P450 CYP2 subfamily	Cytochrome P450 2J6 OS=Mus musculus GN=Cyp2j6 PE=2 SV=2			K14937//methyl farnesoate epoxidase / farnesoate epoxidase [EC:1.14.14.127 1.14.14.128]+ko00981//Insect hormone biosynthesis;K14937//methyl farnesoate epoxidase / farnesoate epoxidase [EC:1.14.14.127 1.14.14.128]+ko00981//Insect hormone biosynthesis;K14937//methyl farnesoate epoxidase / farnesoate epoxidase [EC:1.14.14.127 1.14.14.128]+ko00981//Insect hormone biosynthesis;K14937//methyl farnesoat…
Unigene12571_All	ko00561//Glycerolipid metabolism;ko04072//Phospholipase D signaling pathway;ko01100//Metabolic pathways;ko00564//Glycerophospholipid metabolism;ko04975//Fat digestion and absorption	Digestive system;Signal transduction;Global and overview maps;Lipid metabolism	Metabolism;Organismal Systems;Environmental Information Processing	Novel_gene	2440	5.06	1.67	3.68	1.4	20.1	4.07	1.27621	7.68805e-105	1.34123e-105		PREDICTED: 1-acyl-sn-glycerol-3-phosphate acyltransferase alpha-like [Amyelois transitella]	Acyltransferase	[I] KOG2848 1-acyl-sn-glycerol-3-phosphate acyltransferase	1-acyl-sn-glycerol-3-phosphate acyltransferase alpha OS=Homo sapiens GN=AGPAT1 PE=1 SV=2			K13509//lysophosphatidate acyltransferase [EC:2.3.1.51]+ko04072//Phospholipase D signaling pathway+ko04975//Fat digestion and absorption+ko00564//Glycerophospholipid metabolism+ko00561//Glycerolipid metabolism+ko01100//Metabolic pathways;K13509//lysophosphatidate acyltransferase [EC:2.3.1.51]+ko04072//Phospholipase D signaling pathway+ko04975//Fat digestion and absorption+ko00564//Glycerophosphol…
Unigene12761_All	ko01100//Metabolic pathways;ko03320//PPAR signaling pathway;ko04977//Vitamin digestion and absorption;ko04014//Ras signaling pathway;ko00561//Glycerolipid metabolism;ko05010//Alzheimer disease;ko04975//Fat digestion and absorption;ko04979//Cholesterol metabolism;ko04972//Pancreatic secretion	Endocrine system;Global and overview maps;Neurodegenerative diseases;Lipid metabolism;Digestive system;Signal transduction	Metabolism;Organismal Systems;Human Diseases;Environmental Information Processing	Novel_gene	632	25.69	32.67	28.87	47.44	76.67	67.11	1.13594	2.34257e-152	2.86201e-153		PREDICTED: pancreatic lipase-related protein 2-like [Amyelois transitella]	Lipase	[MOI] TWOG0490 Vitellogenin/Lipoprotein lipase/Triacylglyerol lipase	Lipase member H OS=Xenopus tropicalis GN=liph PE=2 SV=1			K14073//pancreatic triacylglycerol lipase [EC:3.1.1.3]+ko04975//Fat digestion and absorption+ko04977//Vitamin digestion and absorption+ko04972//Pancreatic secretion+ko00561//Glycerolipid metabolism+ko01100//Metabolic pathways;K13618//phospholipase A1 member A [EC:3.1.1.-]+ko04014//Ras signaling pathway;K13618//phospholipase A1 member A [EC:3.1.1.-]+ko04014//Ras signaling pathway;K01059//lipoprote…
Unigene1287_All	ko00140//Steroid hormone biosynthesis;ko00830//Retinol metabolism;ko00053//Ascorbate and aldarate metabolism;ko00982//Drug metabolism - cytochrome P450;ko01100//Metabolic pathways;ko00980//Metabolism of xenobiotics by cytochrome P450;ko00040//Pentose and glucuronate interconversions;ko05204//Chemical carcinogenesis;ko00860//Porphyrin and chlorophyll metabolism;ko00983//Drug metabolism - other enz…	Xenobiotics biodegradation and metabolism;Lipid metabolism;Carbohydrate metabolism;Global and overview maps;Cancers: Overview;Metabolism of cofactors and vitamins	Human Diseases;Metabolism	Novel_gene	1909	2.16	2.35	1.05	4.18	5.56	5.26	1.43012	2.72136e-58	7.94815e-59		UDP-glucuronosyltransferase 2B30-like isoform X1 [Nilaparvata lugens]	UDP-glucoronosyl and UDP-glucosyl transferase	[GC] KOG1192 UDP-glucuronosyl and UDP-glucosyl transferase	UDP-glucuronosyltransferase 2B33 OS=Macaca mulatta GN=UGT2B33 PE=1 SV=1	GO:0008152//metabolic process;GO:0015020//glucuronosyltransferase activity;GO:0016021//integral component of membrane		K00699//glucuronosyltransferase [EC:2.4.1.17]+ko00980//Metabolism of xenobiotics by cytochrome P450+ko00982//Drug metabolism - cytochrome P450+ko00983//Drug metabolism - other enzymes+ko00040//Pentose and glucuronate interconversions+ko00860//Porphyrin and chlorophyll metabolism+ko00053//Ascorbate and aldarate metabolism+ko00830//Retinol metabolism+ko05204//Chemical carcinogenesis+ko00140//Steroi…
Unigene13373_All	ko04340//Hedgehog signaling pathway;ko04341//Hedgehog signaling pathway - fly	Signal transduction	Environmental Information Processing	Novel_gene	1584	3.33	3.44	3.39	6.96	6.48	7.13	1.02236	2.44845e-39	9.91623e-40		PREDICTED: speckle-type POZ protein isoform X4 [Camponotus floridanus]	BTB/POZ domain	[DR] KOG1987 Speckle-type POZ protein SPOP and related proteins with TRAF, MATH and BTB/POZ domains	Speckle-type POZ protein A OS=Xenopus laevis GN=spop-a PE=2 SV=1		Others	K10523//speckle-type POZ protein+ko04341//Hedgehog signaling pathway - fly+ko04340//Hedgehog signaling pathway;K10523//speckle-type POZ protein+ko04341//Hedgehog signaling pathway - fly+ko04340//Hedgehog signaling pathway;K10523//speckle-type POZ protein+ko04341//Hedgehog signaling pathway - fly+ko04340//Hedgehog signaling pathway;K10523//speckle-type POZ protein+ko04341//Hedgehog signaling pathw…
Unigene1421_All	ko01100//Metabolic pathways;ko00630//Glyoxylate and dicarboxylate metabolism	Global and overview maps;Carbohydrate metabolism	Metabolism	Novel_gene	1365	1.48	1.42	1.91	3.49	4.21	2.86	1.14139	2.16077e-21	1.3479e-21		hyi [Eyprepocnemis plorans]	Xylose isomerase-like TIM barrel	[G] KOG4518 Hydroxypyruvate isomerase	Putative hydroxypyruvate isomerase OS=Danio rerio GN=hyi PE=2 SV=2			K01816//hydroxypyruvate isomerase [EC:5.3.1.22]+ko01100//Metabolic pathways+ko00630//Glyoxylate and dicarboxylate metabolism
Unigene14390_All	ko04977//Vitamin digestion and absorption;ko01100//Metabolic pathways;ko04972//Pancreatic secretion;ko04975//Fat digestion and absorption;ko00561//Glycerolipid metabolism	Lipid metabolism;Digestive system;Global and overview maps	Organismal Systems;Metabolism	Novel_gene	497	287.88	757.31	243.79	1453.68	192.75	2004.71	1.52734	0	0		PREDICTED: pancreatic triacylglycerol lipase [Harpegnathos saltator]		[MOI] TWOG0490 Vitellogenin/Lipoprotein lipase/Triacylglyerol lipase				K14073//pancreatic triacylglycerol lipase [EC:3.1.1.3]+ko04975//Fat digestion and absorption+ko04977//Vitamin digestion and absorption+ko04972//Pancreatic secretion+ko00561//Glycerolipid metabolism+ko01100//Metabolic pathways;K14073//pancreatic triacylglycerol lipase [EC:3.1.1.3]+ko04975//Fat digestion and absorption+ko04977//Vitamin digestion and absorption+ko04972//Pancreatic secretion+ko00561/…
Unigene14464_All	ko04975//Fat digestion and absorption;ko04072//Phospholipase D signaling pathway;ko01100//Metabolic pathways;ko00561//Glycerolipid metabolism;ko00564//Glycerophospholipid metabolism	Signal transduction;Lipid metabolism;Global and overview maps;Digestive system	Environmental Information Processing;Metabolism;Organismal Systems	Novel_gene	2480	1.29	1.96	1.46	3.54	6.87	8.61	2.00094	1.61778e-152	1.97474e-153		PREDICTED: 1-acyl-sn-glycerol-3-phosphate acyltransferase alpha-like [Amyelois transitella]	Acyltransferase	[I] KOG2848 1-acyl-sn-glycerol-3-phosphate acyltransferase	1-acyl-sn-glycerol-3-phosphate acyltransferase alpha OS=Homo sapiens GN=AGPAT1 PE=1 SV=2			K13509//lysophosphatidate acyltransferase [EC:2.3.1.51]+ko04072//Phospholipase D signaling pathway+ko04975//Fat digestion and absorption+ko00564//Glycerophospholipid metabolism+ko00561//Glycerolipid metabolism+ko01100//Metabolic pathways;K13509//lysophosphatidate acyltransferase [EC:2.3.1.51]+ko04072//Phospholipase D signaling pathway+ko04975//Fat digestion and absorption+ko00564//Glycerophosphol…
Unigene1664_All	ko04974//Protein digestion and absorption	Digestive system	Organismal Systems	Novel_gene	4746	2.63	4.89	5.07	10.07	10.83	10.78	1.33209	4.21216e-277	2.87984e-278	CT009509.7 Mouse DNA sequence from clone RP23-140C10 on chromosome 13, complete sequence	cysteine-rich motor neuron 1 protein-like isoform X5 [Zootermopsis nevadensis] >XP_021928459.1 cysteine-rich motor neuron 1 protein-like isoform X5 [Zootermopsis nevadensis] >XP_021928460.1 cysteine-rich motor neuron 1 protein-like isoform X5 [Zootermopsis nevadensis] >KDR14990.1 Cysteine-rich motor neuron 1 protein [Zootermopsis nevadensis]	von Willebrand factor type C domain	[WV] KOG1216 von Willebrand factor and related coagulation proteins	Cysteine-rich motor neuron 1 protein OS=Danio rerio GN=crim1 PE=2 SV=1			K19398//Bardet-Biedl syndrome 9 protein;K19721//collagen, type V/XI/XXIV/XXVII, alpha+ko04974//Protein digestion and absorption;K19398//Bardet-Biedl syndrome 9 protein;K19398//Bardet-Biedl syndrome 9 protein;K17280//chordin-like protein 2
Unigene2236_All	ko05146//Amoebiasis;ko05226//Gastric cancer	Cancers: Specific types;Infectious diseases: Parasitic	Human Diseases	Novel_gene	8526	2.22	1.56	2.3	3.72	6.83	5.17	1.36666	5.81164e-258	4.20081e-259	XM_013494441.1 Eimeria mitis hypothetical protein partial mRNA	proteophosphoglycan ppg4 [Leishmania braziliensis MHOM/BR/75/M2904] >CAM43271.1 proteophosphoglycan ppg4 [Leishmania braziliensis MHOM/BR/75/M2904]	Microtubule-binding calmodulin-regulated spectrin-associated	[GO] KOG4157 beta-1,6-N-acetylglucosaminyltransferase, contains WSC domain	Integumentary mucin C.1 (Fragment) OS=Xenopus laevis PE=2 SV=1	GO:0010468//regulation of gene expression;GO:0003682//chromatin binding;GO:0016021//integral component of membrane		K22016//mucin-3/17;K10955//mucin-2+ko05226//Gastric cancer+ko05146//Amoebiasis;K22016//mucin-3/17;K17582//antigen KI-67;K10955//mucin-2+ko05226//Gastric cancer+ko05146//Amoebiasis
Unigene2876_All	ko04380//Osteoclast differentiation	Development	Organismal Systems	Novel_gene	3291	4.74	2.89	6.2	10.87	18.18	10.98	1.53206	4.2978e-296	2.65343e-297	FQ790365.5 Zebrafish DNA sequence from clone CH1073-212K2 in linkage group 1, complete sequence	PREDICTED: four and a half LIM domains protein 3-like isoform X5 [Amyelois transitella]	LIM domain	[TZR] KOG1704 FOG: LIM domain	Four and a half LIM domains protein 2 OS=Rattus norvegicus GN=Fhl2 PE=1 SV=1		Homeobox	K14380//four and a half LIM domains protein 2+ko04380//Osteoclast differentiation;K14380//four and a half LIM domains protein 2+ko04380//Osteoclast differentiation
Unigene3586_All	ko01212//Fatty acid metabolism;ko04910//Insulin signaling pathway;ko04152//AMPK signaling pathway;ko00061//Fatty acid biosynthesis;ko01100//Metabolic pathways	Endocrine system;Signal transduction;Lipid metabolism;Global and overview maps	Organismal Systems;Metabolism;Environmental Information Processing	Novel_gene	4078	3.83	1.24	4.3	8.59	18.53	12.74	2.08298	0	0		PREDICTED: fatty acid synthase-like [Bemisia tabaci]	Polyketide synthase dehydratase	[I] KOG1202 Animal-type fatty acid synthase and related proteins	Fatty acid synthase OS=Gallus gallus GN=FASN PE=1 SV=5			K00665//fatty acid synthase, animal type [EC:2.3.1.85]+ko04910//Insulin signaling pathway+ko00061//Fatty acid biosynthesis+ko04152//AMPK signaling pathway+ko01100//Metabolic pathways+ko01212//Fatty acid metabolism;K00665//fatty acid synthase, animal type [EC:2.3.1.85]+ko04910//Insulin signaling pathway+ko00061//Fatty acid biosynthesis+ko04152//AMPK signaling pathway+ko01100//Metabolic pathways+ko…
Unigene4992_All	ko04610//Complement and coagulation cascades;ko05146//Amoebiasis	Infectious diseases: Parasitic;Immune system	Organismal Systems;Human Diseases	Novel_gene	1526	15.94	12.49	22.2	37.09	43.92	37.43	1.23038	1.35364e-282	8.93108e-284		serine protease inhibitor-like protein, partial [Maconellicoccus hirsutus]	Serpin (serine protease inhibitor)	[V] KOG2392 Serpin	Antithrombin-III OS=Ovis aries GN=SERPINC1 PE=2 SV=1	GO:0005615//extracellular space;GO:0004867//serine-type endopeptidase inhibitor activity;GO:0016740//transferase activity		K03911//antithrombin III+ko04610//Complement and coagulation cascades;K13963//serpin B+ko05146//Amoebiasis;K13963//serpin B+ko05146//Amoebiasis;K13963//serpin B+ko05146//Amoebiasis;K13963//serpin B+ko05146//Amoebiasis
Unigene4995_All	ko00100//Steroid biosynthesis;ko04725//Cholinergic synapse;ko00561//Glycerolipid metabolism;ko01100//Metabolic pathways;ko00983//Drug metabolism - other enzymes;ko00564//Glycerophospholipid metabolism;ko04972//Pancreatic secretion;ko04975//Fat digestion and absorption	Global and overview maps;Xenobiotics biodegradation and metabolism;Lipid metabolism;Nervous system;Digestive system	Metabolism;Organismal Systems	Novel_gene	1857	2.5	1.55	2.83	4.89	7.69	5.41	1.38683	1.3148e-64	3.54568e-65		carboxylesterase [Aphis gossypii]	Carboxylesterase family	[R] KOG1516 Carboxylesterase and related proteins	Esterase E4 OS=Myzus persicae PE=1 SV=1			K12298//bile salt-stimulated lipase [EC:3.1.1.3 3.1.1.13]+ko04975//Fat digestion and absorption+ko04972//Pancreatic secretion+ko00100//Steroid biosynthesis+ko00561//Glycerolipid metabolism+ko01100//Metabolic pathways;K01049//acetylcholinesterase [EC:3.1.1.7]+ko04725//Cholinergic synapse+ko00564//Glycerophospholipid metabolism;K01049//acetylcholinesterase [EC:3.1.1.7]+ko04725//Cholinergic synapse+…
Unigene5060_All	ko04340//Hedgehog signaling pathway;ko04341//Hedgehog signaling pathway - fly	Signal transduction	Environmental Information Processing	Novel_gene	1513	5.66	5.77	4.92	11.79	9.76	12.69	1.07273	2.2772e-66	5.99498e-67		PREDICTED: speckle-type POZ protein isoform X2 [Cyphomyrmex costatus]	BTB/POZ domain	[DR] KOG1987 Speckle-type POZ protein SPOP and related proteins with TRAF, MATH and BTB/POZ domains	Speckle-type POZ protein OS=Danio rerio GN=spop PE=2 SV=1		ZBTB	K10523//speckle-type POZ protein+ko04341//Hedgehog signaling pathway - fly+ko04340//Hedgehog signaling pathway;K10523//speckle-type POZ protein+ko04341//Hedgehog signaling pathway - fly+ko04340//Hedgehog signaling pathway;K10523//speckle-type POZ protein+ko04341//Hedgehog signaling pathway - fly+ko04340//Hedgehog signaling pathway;K10523//speckle-type POZ protein+ko04341//Hedgehog signaling pathw…
Unigene6006_All	ko05205//Proteoglycans in cancer;ko04145//Phagosome;ko05130//Pathogenic Escherichia coli infection;ko04919//Thyroid hormone signaling pathway;ko05110//Vibrio cholerae infection;ko05416//Viral myocarditis;ko05225//Hepatocellular carcinoma;ko04745//Phototransduction - fly;ko04670//Leukocyte transendothelial migration;ko05131//Shigellosis;ko05164//Influenza A;ko05132//Salmonella infection;ko04520//A…	Signal transduction;Immune system;Cellular community - eukaryotes;Environmental adaptation;Infectious diseases: Viral;Cancers: Specific types;Transport and catabolism;Cardiovascular diseases;Endocrine system;Cancers: Overview;Cell motility;Infectious diseases: Bacterial;Sensory system;Cell growth and death	Environmental Information Processing;Cellular Processes;Human Diseases;Organismal Systems	Novel_gene	1657	1.78	1.37	3.46	5.72	4.31	3.73	1.07227	2.37404e-30	1.16767e-30	AY737550.1 Toxoptera citricida putative muscle actin mRNA, complete cds	PREDICTED: LOW QUALITY PROTEIN: actin, muscle-like [Nicrophorus vespilloides]	Actin	[Z] KOG0676 Actin and related proteins	Actin, acrosomal process isoform OS=Limulus polyphemus PE=2 SV=1	GO:0005524//ATP binding		K05692//actin beta/gamma 1+ko04391//Hippo signaling pathway - fly+ko04390//Hippo signaling pathway+ko05414//Dilated cardiomyopathy (DCM)+ko05416//Viral myocarditis+ko05410//Hypertrophic cardiomyopathy (HCM)+ko05412//Arrhythmogenic right ventricular cardiomyopathy (ARVC)+ko04145//Phagosome+ko05132//Salmonella infection+ko05130//Pathogenic Escherichia coli infection+ko05131//Shigellosis+ko04810//Re…
Unigene6147_All	ko00310//Lysine degradation;ko04711//Circadian rhythm - fly	Amino acid metabolism;Environmental adaptation	Metabolism;Organismal Systems	Novel_gene	2196	4.33	3.48	3.14	8.19	24.33	7.6	1.8627	1.82965e-256	1.3265e-257		PREDICTED: uncharacterized protein LOC100904063 [Galendromus occidentalis]	DDE superfamily endonuclease	[BD] KOG3105 DNA-binding centromere protein B (CENP-B)	AF4/FMR2 family member 1 OS=Homo sapiens GN=AFF1 PE=1 SV=1	GO:0003676//nucleic acid binding	HTH	K18646//acidic leucine-rich nuclear phosphoprotein 32 family member A/C/D;K20032//palmitoyltransferase ZDHHC13/17 [EC:2.3.1.225];K17543//PX domain-containing protein kinase-like protein;K12074//timeless+ko04711//Circadian rhythm - fly;K11433//histone-lysine N-methyltransferase SETMAR [EC:2.1.1.43]+ko00310//Lysine degradation
Unigene7234_All	ko00983//Drug metabolism - other enzymes;ko00981//Insect hormone biosynthesis;ko01100//Metabolic pathways	Global and overview maps;Metabolism of terpenoids and polyketides;Xenobiotics biodegradation and metabolism	Metabolism	Novel_gene	1762	1.15	1.29	1.75	2.38	4.06	2.96	1.16629	2.23958e-25	1.24832e-25		Esterase FE4 [Zootermopsis nevadensis]	Carboxylesterase family	[R] KOG1516 Carboxylesterase and related proteins	Venom carboxylesterase-6 OS=Apis mellifera PE=2 SV=1			K01044//carboxylesterase 1 [EC:3.1.1.1]+ko00983//Drug metabolism - other enzymes+ko01100//Metabolic pathways;K01050//cholinesterase [EC:3.1.1.8];K01063//juvenile-hormone esterase [EC:3.1.1.59]+ko00981//Insect hormone biosynthesis;K01050//cholinesterase [EC:3.1.1.8];K03927//carboxylesterase 2 [EC:3.1.1.1 3.1.1.84 3.1.1.56]+ko00983//Drug metabolism - other enzymes
Unigene904_All	ko05164//Influenza A	Infectious diseases: Viral	Human Diseases	Novel_gene	2906	3.36	2.74	5.93	5.03	13	6.32	1.01091	1.95743e-83	4.2553e-84		Heterogeneous nuclear ribonucleoprotein U-like protein 1 [Melipona quadrifasciata]	AAA domain	[A] KOG2242 Scaffold/matrix specific factor hnRNP-U/SAF-A, contains SPRY domain	Heterogeneous nuclear ribonucleoprotein U-like protein 1 OS=Homo sapiens GN=HNRNPUL1 PE=1 SV=2		zf-C2HC	K15047//heterogeneous nuclear ribonucleoprotein U-like protein 1+ko05164//Influenza A;K15047//heterogeneous nuclear ribonucleoprotein U-like protein 1+ko05164//Influenza A;K15047//heterogeneous nuclear ribonucleoprotein U-like protein 1+ko05164//Influenza A;K15047//heterogeneous nuclear ribonucleoprotein U-like protein 1+ko05164//Influenza A

## Sheet: DOWN-Pathway
Gene ID	Pathway Name	Level 2	Level 1	Gene Type	Length	MF6_1 FPKM	MF6_2 FPKM	MF6_3 FPKM	TF6_1 FPKM	TF6_2 FPKM	TF6_3 FPKM	log2(TF6/MF6)	Qvalue(MF6-vs-TF6)	Pvalue(MF6-vs-TF6)	Nt	Nr	Pfam	Kog	Swissprot	GO	TFs	Kegg Orthology
CL1004.Contig3_All	ko05410//Hypertrophic cardiomyopathy (HCM);ko05414//Dilated cardiomyopathy (DCM);ko05020//Prion diseases;ko04514//Cell adhesion molecules (CAMs)	Signaling molecules and interaction;Neurodegenerative diseases;Cardiovascular diseases	Environmental Information Processing;Human Diseases	Novel_gene	2815	5.35	2.24	1.76	1.18	1.75	1.72	-1.01079	2.9583e-32	1.39266e-32		PREDICTED: neural cell adhesion molecule 2-like [Cimex lectularius]	Immunoglobulin domain	[Z] KOG0613 Projectin/twitchin and related proteins	Titin OS=Homo sapiens GN=TTN PE=1 SV=4			K06491//neural cell adhesion molecule+ko04514//Cell adhesion molecules (CAMs)+ko05020//Prion diseases;K17341//hemicentin;K06491//neural cell adhesion molecule+ko04514//Cell adhesion molecules (CAMs)+ko05020//Prion diseases;K12567//titin [EC:2.7.11.1]+ko05414//Dilated cardiomyopathy (DCM)+ko05410//Hypertrophic cardiomyopathy (HCM);K06768//Down syndrome cell adhesion molecule-like protein 1
CL1006.Contig1_All	ko05200//Pathways in cancer;ko05206//MicroRNAs in cancer;ko04550//Signaling pathways regulating pluripotency of stem cells;ko04714//Thermogenesis;ko05219//Bladder cancer;ko05215//Prostate cancer;ko05218//Melanoma;ko04014//Ras signaling pathway;ko05205//Proteoglycans in cancer;ko01521//EGFR tyrosine kinase inhibitor resistance;ko05230//Central carbon metabolism in cancer;ko04520//Adherens junction…	Signal transduction;Drug resistance: Antineoplastic;Cell motility;Cellular community - eukaryotes;Environmental adaptation;Endocrine system;Cancers: Overview;Transport and catabolism;Cancers: Specific types	Organismal Systems;Human Diseases;Environmental Information Processing;Cellular Processes	Novel_gene	2835	15.8	7.23	11.97	6.13	6.52	2.61	-1.19078	5.5686e-152	6.81549e-153	XM_002432601.1 Pediculus humanus corporis tyrosine kinase receptor, putative, mRNA	tyrosine kinase receptor Cad96Ca-like isoform X2 [Zootermopsis nevadensis]	Protein tyrosine kinase	[T] KOG0200 Fibroblast/platelet-derived growth factor receptor and related receptor tyrosine kinases	Tyrosine kinase receptor Cad96Ca OS=Drosophila melanogaster GN=Cad96Ca PE=2 SV=2	GO:0004713//protein tyrosine kinase activity;GO:0005524//ATP binding;GO:0007156//homophilic cell adhesion via plasma membrane adhesion molecules;GO:0005509//calcium ion binding;GO:0016021//integral component of membrane		K08252//receptor protein-tyrosine kinase [EC:2.7.10.1];K04362//fibroblast growth factor receptor 1 [EC:2.7.10.1]+ko04810//Regulation of actin cytoskeleton+ko04550//Signaling pathways regulating pluripotency of stem cells+ko05215//Prostate cancer+ko05218//Melanoma+ko04714//Thermogenesis+ko05200//Pathways in cancer+ko05205//Proteoglycans in cancer+ko05224//Breast cancer+ko04151//PI3K-Akt signaling …
CL1014.Contig2_All	ko00052//Galactose metabolism;ko00520//Amino sugar and nucleotide sugar metabolism;ko00010//Glycolysis / Gluconeogenesis;ko01100//Metabolic pathways;ko00500//Starch and sucrose metabolism;ko00230//Purine metabolism;ko00030//Pentose phosphate pathway	Global and overview maps;Nucleotide metabolism;Carbohydrate metabolism	Metabolism	Novel_gene	1426	36.08	25.57	27.01	13.62	8.74	8.08	-1.52826	2.19636e-273	1.51835e-274		PREDICTED: phosphoglucomutase [Anoplophora glabripennis]	Phosphoglucomutase/phosphomannomutase, alpha/beta/alpha domain III	[G] KOG0625 Phosphoglucomutase	Phosphoglucomutase OS=Drosophila simulans GN=Pgm PE=3 SV=1	GO:0000287//magnesium ion binding;GO:0005975//carbohydrate metabolic process;GO:0016868//intramolecular transferase activity, phosphotransferases		K01835//phosphoglucomutase [EC:5.4.2.2]+ko00230//Purine metabolism+ko00010//Glycolysis / Gluconeogenesis+ko00052//Galactose metabolism+ko00500//Starch and sucrose metabolism+ko00030//Pentose phosphate pathway+ko00520//Amino sugar and nucleotide sugar metabolism+ko01100//Metabolic pathways;K01835//phosphoglucomutase [EC:5.4.2.2]+ko00230//Purine metabolism+ko00010//Glycolysis / Gluconeogenesis+ko00…
CL1014.Contig4_All	ko00052//Galactose metabolism;ko01100//Metabolic pathways;ko00230//Purine metabolism;ko00520//Amino sugar and nucleotide sugar metabolism;ko00500//Starch and sucrose metabolism;ko00010//Glycolysis / Gluconeogenesis;ko00030//Pentose phosphate pathway	Global and overview maps;Carbohydrate metabolism;Nucleotide metabolism	Metabolism	Novel_gene	5948	10.67	7.11	8.6	2.57	2.75	1.21	-2.01098	0	0	XM_022344110.1 PREDICTED: Nilaparvata lugens phosphoglucomutase-like (LOC111056720), mRNA	PREDICTED: phosphoglucomutase [Cephus cinctus]	Phosphoglucomutase/phosphomannomutase, alpha/beta/alpha domain I	[G] KOG0625 Phosphoglucomutase	Phosphoglucomutase OS=Drosophila melanogaster GN=Pgm PE=1 SV=1			K01835//phosphoglucomutase [EC:5.4.2.2]+ko00230//Purine metabolism+ko00010//Glycolysis / Gluconeogenesis+ko00052//Galactose metabolism+ko00500//Starch and sucrose metabolism+ko00030//Pentose phosphate pathway+ko00520//Amino sugar and nucleotide sugar metabolism+ko01100//Metabolic pathways;K01835//phosphoglucomutase [EC:5.4.2.2]+ko00230//Purine metabolism+ko00010//Glycolysis / Gluconeogenesis+ko00…
CL1035.Contig4_All	ko04136//Autophagy - other;ko04140//Autophagy - animal	Transport and catabolism	Cellular Processes	Novel_gene	7000	7.95	10.03	11.88	2.98	4.35	3.9	-1.4151	0	0		PREDICTED: autophagy-related protein 2 homolog B [Diachasma alloeum]	Autophagy-related protein C terminal domain	[U] KOG2993 Cytoplasm to vacuole targeting protein	Autophagy-related protein 2 homolog B OS=Homo sapiens GN=ATG2B PE=1 SV=5			K17906//autophagy-related protein 2+ko04140//Autophagy - animal+ko04136//Autophagy - other;K17906//autophagy-related protein 2+ko04140//Autophagy - animal+ko04136//Autophagy - other;K17906//autophagy-related protein 2+ko04140//Autophagy - animal+ko04136//Autophagy - other;K17906//autophagy-related protein 2+ko04140//Autophagy - animal+ko04136//Autophagy - other;K17906//autophagy-related protein 2…
CL1044.Contig2_All	ko01100//Metabolic pathways;ko00630//Glyoxylate and dicarboxylate metabolism;ko01523//Antifolate resistance;ko01200//Carbon metabolism;ko00670//One carbon pool by folate;ko00260//Glycine, serine and threonine metabolism;ko01230//Biosynthesis of amino acids	Amino acid metabolism;Carbohydrate metabolism;Global and overview maps;Drug resistance: Antineoplastic;Metabolism of cofactors and vitamins	Metabolism;Human Diseases	Novel_gene	1652	20.25	9.24	17.43	11.4	7.47	4.3	-1.00094	4.24995e-88	8.68469e-89	XM_020424904.1 PREDICTED: Pseudomyrmex gracilis serine hydroxymethyltransferase, cytosolic-like (LOC109853115), transcript variant X3, mRNA	PREDICTED: serine hydroxymethyltransferase, cytosolic isoform X4 [Orussus abietinus]	Serine hydroxymethyltransferase	[E] KOG2467 Glycine/serine hydroxymethyltransferase	Serine hydroxymethyltransferase, cytosolic OS=Ovis aries GN=SHMT1 PE=1 SV=3			K00600//glycine hydroxymethyltransferase [EC:2.1.2.1]+ko00670//One carbon pool by folate+ko01200//Carbon metabolism+ko01523//Antifolate resistance+ko01230//Biosynthesis of amino acids+ko00260//Glycine, serine and threonine metabolism+ko01100//Metabolic pathways+ko00630//Glyoxylate and dicarboxylate metabolism;K00600//glycine hydroxymethyltransferase [EC:2.1.2.1]+ko00670//One carbon pool by folate…
CL1056.Contig15_All	ko05204//Chemical carcinogenesis;ko00983//Drug metabolism - other enzymes;ko00980//Metabolism of xenobiotics by cytochrome P450;ko00053//Ascorbate and aldarate metabolism;ko00860//Porphyrin and chlorophyll metabolism;ko01100//Metabolic pathways;ko00040//Pentose and glucuronate interconversions;ko00140//Steroid hormone biosynthesis;ko00830//Retinol metabolism;ko00982//Drug metabolism - cytochrome …	Lipid metabolism;Carbohydrate metabolism;Metabolism of cofactors and vitamins;Xenobiotics biodegradation and metabolism;Cancers: Overview;Global and overview maps	Metabolism;Human Diseases	Novel_gene	2195	3.28	6.72	5.7	2.46	2.17	1.74	-1.29632	9.69751e-61	2.73533e-61		UDP-glucuronosyltransferase 2C1-like isoform X3 [Myzus persicae]	UDP-glucoronosyl and UDP-glucosyl transferase	[GC] KOG1192 UDP-glucuronosyl and UDP-glucosyl transferase	UDP-glucuronosyltransferase 2B15 OS=Homo sapiens GN=UGT2B15 PE=1 SV=3	GO:0008152//metabolic process;GO:0015020//glucuronosyltransferase activity;GO:0016021//integral component of membrane		K00699//glucuronosyltransferase [EC:2.4.1.17]+ko00980//Metabolism of xenobiotics by cytochrome P450+ko00982//Drug metabolism - cytochrome P450+ko00983//Drug metabolism - other enzymes+ko00040//Pentose and glucuronate interconversions+ko00860//Porphyrin and chlorophyll metabolism+ko00053//Ascorbate and aldarate metabolism+ko00830//Retinol metabolism+ko05204//Chemical carcinogenesis+ko00140//Steroi…
CL1056.Contig7_All	ko00983//Drug metabolism - other enzymes;ko00830//Retinol metabolism;ko00140//Steroid hormone biosynthesis;ko00982//Drug metabolism - cytochrome P450;ko00040//Pentose and glucuronate interconversions;ko05204//Chemical carcinogenesis;ko01100//Metabolic pathways;ko00980//Metabolism of xenobiotics by cytochrome P450;ko00860//Porphyrin and chlorophyll metabolism;ko00053//Ascorbate and aldarate metabo…	Xenobiotics biodegradation and metabolism;Cancers: Overview;Carbohydrate metabolism;Metabolism of cofactors and vitamins;Lipid metabolism;Global and overview maps	Metabolism;Human Diseases	Novel_gene	2165	7.86	10.65	8.54	4.57	3.04	2.98	-1.3432	9.72493e-108	1.65324e-108		UDP-glucuronosyltransferase 2C1-like isoform X3 [Myzus persicae]	UDP-glucoronosyl and UDP-glucosyl transferase	[GC] KOG1192 UDP-glucuronosyl and UDP-glucosyl transferase	UDP-glucuronosyltransferase 2B10 OS=Homo sapiens GN=UGT2B10 PE=1 SV=1			K00699//glucuronosyltransferase [EC:2.4.1.17]+ko00980//Metabolism of xenobiotics by cytochrome P450+ko00982//Drug metabolism - cytochrome P450+ko00983//Drug metabolism - other enzymes+ko00040//Pentose and glucuronate interconversions+ko00860//Porphyrin and chlorophyll metabolism+ko00053//Ascorbate and aldarate metabolism+ko00830//Retinol metabolism+ko05204//Chemical carcinogenesis+ko00140//Steroi…
CL1063.Contig2_All	ko04621//NOD-like receptor signaling pathway;ko04210//Apoptosis;ko04142//Lysosome;ko04140//Autophagy - animal;ko04612//Antigen processing and presentation;ko04924//Renin secretion	Transport and catabolism;Immune system;Cell growth and death;Endocrine system	Organismal Systems;Cellular Processes	Novel_gene	1152	3.7	6.77	9.61	2.06	2.48	2.06	-1.59792	8.86871e-54	2.79557e-54		PREDICTED: cathepsin B-like cysteine proteinase 4 [Halyomorpha halys]	Papain family cysteine protease	[O] KOG1543 Cysteine proteinase Cathepsin L	Cathepsin B-like cysteine proteinase 4 OS=Caenorhabditis elegans GN=cpr-4 PE=2 SV=1	GO:0004197//cysteine-type endopeptidase activity;GO:0050790//regulation of catalytic activity		K01363//cathepsin B [EC:3.4.22.1]+ko04140//Autophagy - animal+ko04142//Lysosome+ko04210//Apoptosis+ko04612//Antigen processing and presentation+ko04621//NOD-like receptor signaling pathway+ko04924//Renin secretion;K01363//cathepsin B [EC:3.4.22.1]+ko04140//Autophagy - animal+ko04142//Lysosome+ko04210//Apoptosis+ko04612//Antigen processing and presentation+ko04621//NOD-like receptor signaling path…
CL1103.Contig5_All	ko04910//Insulin signaling pathway	Endocrine system	Organismal Systems	Novel_gene	2130	45.52	34.23	37.07	14.06	12.88	16.56	-1.42166	0	0		PREDICTED: flotillin-2 isoform X1 [Cimex lectularius]	SPFH domain / Band 7 family	[UZ] KOG2668 Flotillins	Flotillin-2 OS=Drosophila melanogaster GN=Flo2 PE=2 SV=3			K07192//flotillin+ko04910//Insulin signaling pathway;K07192//flotillin+ko04910//Insulin signaling pathway;K07192//flotillin+ko04910//Insulin signaling pathway;K07192//flotillin+ko04910//Insulin signaling pathway;K07192//flotillin+ko04910//Insulin signaling pathway
CL1124.Contig2_All	ko05170//Human immunodeficiency virus 1 infection;ko04142//Lysosome	Transport and catabolism;Infectious diseases: Viral	Cellular Processes;Human Diseases	Novel_gene	4439	9.43	5.21	7.3	3.79	2.79	2.75	-1.22592	4.83729e-158	5.6733e-159	XM_020019013.1 PREDICTED: Aethina tumida AP-1 complex subunit beta-1-like (LOC109602597), mRNA	AP-1 complex subunit beta-1 [Zootermopsis nevadensis] >XP_021918643.1 AP-1 complex subunit beta-1 [Zootermopsis nevadensis] >KDR20112.1 AP-2 complex subunit beta [Zootermopsis nevadensis]	Adaptin N terminal region	[U] KOG1061 Vesicle coat complex AP-1/AP-2/AP-4, beta subunit	AP-1 complex subunit beta-1 OS=Homo sapiens GN=AP1B1 PE=1 SV=2			K12392//AP-1 complex subunit beta-1+ko04142//Lysosome+ko05170//Human immunodeficiency virus 1 infection;K12392//AP-1 complex subunit beta-1+ko04142//Lysosome+ko05170//Human immunodeficiency virus 1 infection;K12392//AP-1 complex subunit beta-1+ko04142//Lysosome+ko05170//Human immunodeficiency virus 1 infection;K12392//AP-1 complex subunit beta-1+ko04142//Lysosome+ko05170//Human immunodeficiency v…
CL1124.Contig3_All	ko04142//Lysosome;ko05170//Human immunodeficiency virus 1 infection	Transport and catabolism;Infectious diseases: Viral	Cellular Processes;Human Diseases	Novel_gene	3989	40.64	23.56	27.9	8.03	6.5	5.76	-2.17586	0	0	XM_020019013.1 PREDICTED: Aethina tumida AP-1 complex subunit beta-1-like (LOC109602597), mRNA	AP-1 complex subunit beta-1 [Zootermopsis nevadensis] >XP_021918643.1 AP-1 complex subunit beta-1 [Zootermopsis nevadensis] >KDR20112.1 AP-2 complex subunit beta [Zootermopsis nevadensis]	Adaptin N terminal region	[U] KOG1061 Vesicle coat complex AP-1/AP-2/AP-4, beta subunit	AP-1 complex subunit beta-1 OS=Homo sapiens GN=AP1B1 PE=1 SV=2			K12392//AP-1 complex subunit beta-1+ko04142//Lysosome+ko05170//Human immunodeficiency virus 1 infection;K12392//AP-1 complex subunit beta-1+ko04142//Lysosome+ko05170//Human immunodeficiency virus 1 infection;K12392//AP-1 complex subunit beta-1+ko04142//Lysosome+ko05170//Human immunodeficiency virus 1 infection;K12392//AP-1 complex subunit beta-1+ko04142//Lysosome+ko05170//Human immunodeficiency v…
CL1126.Contig1_All	ko03018//RNA degradation	Folding, sorting and degradation	Genetic Information Processing	Novel_gene	2952	32.51	29.65	23.94	4.11	1.45	3.65	-3.21391	0	0		PREDICTED: exosome complex component CSL4 [Neodiprion lecontei]	Exosome complex exonuclease RRP4 N-terminal region	[J] KOG3409 Exosomal 3'-5' exoribonuclease complex, subunit ski4 (Csl4)	Exosome complex component CSL4 OS=Mus musculus GN=Exosc1 PE=1 SV=1	GO:0003723//RNA binding;GO:0000178//exosome (RNase complex)		K07573//exosome complex component CSL4+ko03018//RNA degradation;K07573//exosome complex component CSL4+ko03018//RNA degradation;K07573//exosome complex component CSL4+ko03018//RNA degradation;K07573//exosome complex component CSL4+ko03018//RNA degradation;K07573//exosome complex component CSL4+ko03018//RNA degradation
CL1127.Contig1_All	ko01100//Metabolic pathways;ko00590//Arachidonic acid metabolism	Global and overview maps;Lipid metabolism	Metabolism	Novel_gene	1577	31.3	31.54	30.15	1.64	1.57	1.29	-4.36245	0	0	AC102484.7 Mus musculus chromosome 1, clone RP24-455F18, complete sequence	PREDICTED: prostaglandin E synthase 3 isoform X1 [Orussus abietinus]	CS domain	[O] KOG3158 HSP90 co-chaperone p23	Prostaglandin E synthase 3 OS=Bos taurus GN=PTGES3 PE=1 SV=1			K15730//cytosolic prostaglandin-E synthase [EC:5.3.99.3]+ko00590//Arachidonic acid metabolism+ko01100//Metabolic pathways;K15730//cytosolic prostaglandin-E synthase [EC:5.3.99.3]+ko00590//Arachidonic acid metabolism+ko01100//Metabolic pathways;K15730//cytosolic prostaglandin-E synthase [EC:5.3.99.3]+ko00590//Arachidonic acid metabolism+ko01100//Metabolic pathways;K15730//cytosolic prostaglandin-E…
CL1139.Contig3_All	ko04122//Sulfur relay system	Folding, sorting and degradation	Genetic Information Processing	Novel_gene	5525	5.31	4.57	5.61	1.7	1.42	1.52	-1.73448	1.98947e-233	1.56995e-234		PREDICTED: uncharacterized protein LOC109031724 [Bemisia tabaci]	Aminotransferase class-V	[R] KOG2840 Uncharacterized conserved protein with similarity to predicted ATPase of the PP-loop superfamily	Cytoplasmic tRNA 2-thiolation protein 1 OS=Anopheles gambiae GN=AGAP005220 PE=3 SV=3	GO:0003824//catalytic activity		K14168//cytoplasmic tRNA 2-thiolation protein 1 [EC:2.7.7.-]+ko04122//Sulfur relay system;K14168//cytoplasmic tRNA 2-thiolation protein 1 [EC:2.7.7.-]+ko04122//Sulfur relay system;K14168//cytoplasmic tRNA 2-thiolation protein 1 [EC:2.7.7.-]+ko04122//Sulfur relay system;K14168//cytoplasmic tRNA 2-thiolation protein 1 [EC:2.7.7.-]+ko04122//Sulfur relay system;K14168//cytoplasmic tRNA 2-thiolation p…
CL1194.Contig1_All	ko05205//Proteoglycans in cancer;ko05206//MicroRNAs in cancer	Cancers: Overview	Human Diseases	Novel_gene	2013	59.01	56.82	56.35	28.45	23.07	30.44	-1.06589	0	0		PREDICTED: programmed cell death protein 4 isoform X1 [Cimex lectularius]	MA3 domain	[T] KOG0403 Neoplastic transformation suppressor Pdcd4/MA-3, contains MA3 domain	Programmed cell death protein 4 OS=Gallus gallus GN=PDCD4 PE=2 SV=1			K16865//programmed cell death protein 4+ko05205//Proteoglycans in cancer+ko05206//MicroRNAs in cancer;K16865//programmed cell death protein 4+ko05205//Proteoglycans in cancer+ko05206//MicroRNAs in cancer;K16865//programmed cell death protein 4+ko05205//Proteoglycans in cancer+ko05206//MicroRNAs in cancer;K16865//programmed cell death protein 4+ko05205//Proteoglycans in cancer+ko05206//MicroRNAs i…
CL1230.Contig1_All	ko00600//Sphingolipid metabolism;ko04071//Sphingolipid signaling pathway	Lipid metabolism;Signal transduction	Metabolism;Environmental Information Processing	Novel_gene	2018	7.2	6.16	7.1	2.82	1.51	4.18	-1.2588	5.42827e-69	1.3848e-69		sphingosine-1-phosphate phosphatase 2-like [Myzus persicae]	PAP2 superfamily	[I] KOG2822 Sphingoid base-phosphate phosphatase	Sphingosine-1-phosphate phosphatase 1 OS=Rattus norvegicus GN=Sgpp1 PE=1 SV=2	GO:0016021//integral component of membrane		K04716//sphingosine-1-phosphate phosphatase 1 [EC:3.1.3.-]+ko04071//Sphingolipid signaling pathway+ko00600//Sphingolipid metabolism;K04716//sphingosine-1-phosphate phosphatase 1 [EC:3.1.3.-]+ko04071//Sphingolipid signaling pathway+ko00600//Sphingolipid metabolism;K04716//sphingosine-1-phosphate phosphatase 1 [EC:3.1.3.-]+ko04071//Sphingolipid signaling pathway+ko00600//Sphingolipid metabolism;K04…
CL1230.Contig3_All	ko00600//Sphingolipid metabolism;ko04071//Sphingolipid signaling pathway	Lipid metabolism;Signal transduction	Environmental Information Processing;Metabolism	Novel_gene	2171	16.97	12.34	14.4	7.19	2.98	8.69	-1.20316	2.41521e-146	3.0794e-147		sphingosine-1-phosphate phosphatase 2-like [Myzus persicae]	PAP2 superfamily	[I] KOG2822 Sphingoid base-phosphate phosphatase	Sphingosine-1-phosphate phosphatase 1 OS=Rattus norvegicus GN=Sgpp1 PE=1 SV=2	GO:0016021//integral component of membrane		K04716//sphingosine-1-phosphate phosphatase 1 [EC:3.1.3.-]+ko04071//Sphingolipid signaling pathway+ko00600//Sphingolipid metabolism;K04716//sphingosine-1-phosphate phosphatase 1 [EC:3.1.3.-]+ko04071//Sphingolipid signaling pathway+ko00600//Sphingolipid metabolism;K04716//sphingosine-1-phosphate phosphatase 1 [EC:3.1.3.-]+ko04071//Sphingolipid signaling pathway+ko00600//Sphingolipid metabolism;K04…
CL1260.Contig3_All	ko03420//Nucleotide excision repair;ko03030//DNA replication;ko03410//Base excision repair	Replication and repair	Genetic Information Processing	Novel_gene	3678	17.06	17.27	17.87	4.21	2.81	3.1	-2.3582	0	0	XM_021730952.1 PREDICTED: Ictidomys tridecemlineatus zinc finger protein 358 (Znf358), mRNA	DNA polymerase epsilon subunit 2 [Zootermopsis nevadensis] >KDR06663.1 DNA polymerase epsilon subunit 2 [Zootermopsis nevadensis]	DNA polymerase alpha/epsilon subunit B	[L] KOG3818 DNA polymerase epsilon, subunit B	DNA polymerase epsilon subunit 2 OS=Bos taurus GN=POLE2 PE=2 SV=1	GO:0003887//DNA-directed DNA polymerase activity;GO:0003677//DNA binding;GO:0006261//DNA-dependent DNA replication;GO:0008622//epsilon DNA polymerase complex	ZBTB	K02325//DNA polymerase epsilon subunit 2 [EC:2.7.7.7]+ko03420//Nucleotide excision repair+ko03030//DNA replication+ko03410//Base excision repair;K02325//DNA polymerase epsilon subunit 2 [EC:2.7.7.7]+ko03420//Nucleotide excision repair+ko03030//DNA replication+ko03410//Base excision repair;K02325//DNA polymerase epsilon subunit 2 [EC:2.7.7.7]+ko03420//Nucleotide excision repair+ko03030//DNA replic…
CL129.Contig4_All	ko05230//Central carbon metabolism in cancer;ko00520//Amino sugar and nucleotide sugar metabolism;ko01200//Carbon metabolism;ko00051//Fructose and mannose metabolism;ko01100//Metabolic pathways;ko04066//HIF-1 signaling pathway;ko00500//Starch and sucrose metabolism;ko04930//Type II diabetes mellitus;ko04973//Carbohydrate digestion and absorption;ko00010//Glycolysis / Gluconeogenesis;ko00052//Gala…	Signal transduction;Biosynthesis of other secondary metabolites;Endocrine and metabolic diseases;Carbohydrate metabolism;Endocrine system;Cancers: Overview;Global and overview maps;Digestive system	Organismal Systems;Metabolism;Environmental Information Processing;Human Diseases	Novel_gene	1607	37.42	23.32	36.54	10.78	15.5	14.63	-1.24996	7.28561e-251	5.36918e-252	XM_013336665.1 PREDICTED: Amyelois transitella hexokinase type 2 (LOC106136177), transcript variant X4, mRNA	PREDICTED: hexokinase type 2 isoform X2 [Bemisia tabaci]	Hexokinase	[G] KOG1369 Hexokinase	Hexokinase-2 OS=Homo sapiens GN=HK2 PE=1 SV=2			K00844//hexokinase [EC:2.7.1.1]+ko01200//Carbon metabolism+ko04910//Insulin signaling pathway+ko00010//Glycolysis / Gluconeogenesis+ko00052//Galactose metabolism+ko00500//Starch and sucrose metabolism+ko00051//Fructose and mannose metabolism+ko04973//Carbohydrate digestion and absorption+ko04930//Type II diabetes mellitus+ko00520//Amino sugar and nucleotide sugar metabolism+ko00524//Neomycin, kan…
CL129.Contig6_All	ko01200//Carbon metabolism;ko04910//Insulin signaling pathway;ko00010//Glycolysis / Gluconeogenesis;ko04930//Type II diabetes mellitus;ko00520//Amino sugar and nucleotide sugar metabolism;ko00524//Neomycin, kanamycin and gentamicin biosynthesis;ko00500//Starch and sucrose metabolism;ko00052//Galactose metabolism;ko05230//Central carbon metabolism in cancer;ko04066//HIF-1 signaling pathway;ko01100…	Signal transduction;Global and overview maps;Endocrine and metabolic diseases;Biosynthesis of other secondary metabolites;Cancers: Overview;Endocrine system;Carbohydrate metabolism;Digestive system	Environmental Information Processing;Human Diseases;Organismal Systems;Metabolism	Novel_gene	2271	25.18	19.73	28.31	10.54	8.92	13.01	-1.16864	3.28176e-244	2.46489e-245	XM_013336665.1 PREDICTED: Amyelois transitella hexokinase type 2 (LOC106136177), transcript variant X4, mRNA	PREDICTED: hexokinase type 2 isoform X1 [Bemisia tabaci]	Hexokinase	[G] KOG1369 Hexokinase	Hexokinase type 2 OS=Drosophila melanogaster GN=Hex-t2 PE=2 SV=4			K00844//hexokinase [EC:2.7.1.1]+ko01200//Carbon metabolism+ko04910//Insulin signaling pathway+ko00010//Glycolysis / Gluconeogenesis+ko00052//Galactose metabolism+ko00500//Starch and sucrose metabolism+ko00051//Fructose and mannose metabolism+ko04973//Carbohydrate digestion and absorption+ko04930//Type II diabetes mellitus+ko00520//Amino sugar and nucleotide sugar metabolism+ko00524//Neomycin, kan…
CL1290.Contig5_All	ko03018//RNA degradation	Folding, sorting and degradation	Genetic Information Processing	Novel_gene	1362	4.82	6.85	8.66	2.22	1.22	2.04	-1.87995	4.71888e-81	1.05406e-81		PREDICTED: pyrazinamidase/nicotinamidase [Nicrophorus vespilloides] >XP_017781664.1 PREDICTED: pyrazinamidase/nicotinamidase [Nicrophorus vespilloides] >XP_017781665.1 PREDICTED: pyrazinamidase/nicotinamidase [Nicrophorus vespilloides] >XP_017781666.1 PREDICTED: pyrazinamidase/nicotinamidase [Nicrophorus vespilloides]	Isochorismatase family	[V] KOG4003 Pyrazinamidase/nicotinamidase PNC1		GO:0006769//nicotinamide metabolic process;GO:0008936//nicotinamidase activity;GO:0008152//metabolic process;GO:0005509//calcium ion binding;GO:0003824//catalytic activity;GO:0005737//cytoplasm		K03679//exosome complex component RRP4+ko03018//RNA degradation;K03679//exosome complex component RRP4+ko03018//RNA degradation;K03679//exosome complex component RRP4+ko03018//RNA degradation;K03679//exosome complex component RRP4+ko03018//RNA degradation;K03679//exosome complex component RRP4+ko03018//RNA degradation
CL1292.Contig3_All	ko05168//Herpes simplex infection;ko04137//Mitophagy - animal;ko04520//Adherens junction;ko05162//Measles;ko03008//Ribosome biogenesis in eukaryotes;ko04310//Wnt signaling pathway;ko04064//NF-kappa B signaling pathway	Infectious diseases: Viral;Signal transduction;Transport and catabolism;Translation;Cellular community - eukaryotes	Human Diseases;Environmental Information Processing;Cellular Processes;Genetic Information Processing	Novel_gene	1209	50.19	43.97	52.29	24.92	9.76	24.28	-1.29707	6.10804e-295	3.80425e-296	XM_003490846.2 PREDICTED: Bombus impatiens casein kinase II subunit beta (LOC100750200), transcript variant X3, mRNA	PREDICTED: casein kinase II subunit beta [Agrilus planipennis]	Casein kinase II regulatory subunit	[TDK] KOG3092 Casein kinase II, beta subunit	Casein kinase II subunit beta OS=Bos taurus GN=CSNK2B PE=1 SV=1	GO:0019887//protein kinase regulator activity;GO:0016301//kinase activity;GO:0005956//protein kinase CK2 complex		K03115//casein kinase II subunit beta+ko04310//Wnt signaling pathway+ko04137//Mitophagy - animal+ko04520//Adherens junction+ko03008//Ribosome biogenesis in eukaryotes+ko04064//NF-kappa B signaling pathway+ko05162//Measles+ko05168//Herpes simplex infection;K03115//casein kinase II subunit beta+ko04310//Wnt signaling pathway+ko04137//Mitophagy - animal+ko04520//Adherens junction+ko03008//Ribosome b…
CL1292.Contig4_All	ko04520//Adherens junction;ko04137//Mitophagy - animal;ko05162//Measles;ko03008//Ribosome biogenesis in eukaryotes;ko04310//Wnt signaling pathway;ko05168//Herpes simplex infection;ko04064//NF-kappa B signaling pathway	Transport and catabolism;Translation;Cellular community - eukaryotes;Infectious diseases: Viral;Signal transduction	Cellular Processes;Genetic Information Processing;Environmental Information Processing;Human Diseases	Novel_gene	1210	14.17	14.86	17.89	7.44	2.77	4.78	-1.62546	2.2877e-133	3.16548e-134	XM_003490846.2 PREDICTED: Bombus impatiens casein kinase II subunit beta (LOC100750200), transcript variant X3, mRNA	PREDICTED: casein kinase II subunit beta [Agrilus planipennis]	Casein kinase II regulatory subunit	[TDK] KOG3092 Casein kinase II, beta subunit	Casein kinase II subunit beta OS=Bos taurus GN=CSNK2B PE=1 SV=1	GO:0019887//protein kinase regulator activity;GO:0016301//kinase activity;GO:0005956//protein kinase CK2 complex		K03115//casein kinase II subunit beta+ko04310//Wnt signaling pathway+ko04137//Mitophagy - animal+ko04520//Adherens junction+ko03008//Ribosome biogenesis in eukaryotes+ko04064//NF-kappa B signaling pathway+ko05162//Measles+ko05168//Herpes simplex infection;K03115//casein kinase II subunit beta+ko04310//Wnt signaling pathway+ko04137//Mitophagy - animal+ko04520//Adherens junction+ko03008//Ribosome b…
CL130.Contig7_All	ko03013//RNA transport;ko03040//Spliceosome;ko03015//mRNA surveillance pathway	Translation;Transcription	Genetic Information Processing	Novel_gene	6787	3.73	4.12	5.45	1.38	1.35	2.1	-1.46358	2.2708e-193	2.16713e-194	XM_013496464.1 Eimeria mitis hypothetical protein partial mRNA	centrosomin-like [Zootermopsis nevadensis]	Centrosomin N-terminal motif 1	[U] KOG0946 ER-Golgi vesicle-tethering protein p115	Nucleoporin GLE1 OS=Dictyostelium discoideum GN=gle1 PE=3 SV=1	GO:0007018//microtubule-based movement;GO:0005815//microtubule organizing center;GO:0005524//ATP binding;GO:0003777//microtubule motor activity;GO:0008017//microtubule binding	zf-C2H2	K16718//centrosomin;K16718//centrosomin;K12875//apoptotic chromatin condensation inducer in the nucleus+ko03040//Spliceosome+ko03013//RNA transport+ko03015//mRNA surveillance pathway;K12875//apoptotic chromatin condensation inducer in the nucleus+ko03040//Spliceosome+ko03013//RNA transport+ko03015//mRNA surveillance pathway;K20478//golgin subfamily B member 1
CL134.Contig22_All	ko03018//RNA degradation	Folding, sorting and degradation	Genetic Information Processing	Novel_gene	8501	15.86	21.3	21.85	5.85	6.58	6.8	-1.61877	0	0	XM_017914479.1 PREDICTED: Nicrophorus vespilloides superkiller viralicidic activity 2-like 2 (LOC108557812), mRNA	PREDICTED: superkiller viralicidic activity 2-like 2 [Nasonia vitripennis]	rRNA-processing arch domain	[A] KOG0948 Nuclear exosomal RNA helicase MTR4, DEAD-box superfamily	Superkiller viralicidic activity 2-like 2 OS=Mus musculus GN=Skiv2l2 PE=1 SV=1	GO:0006401//RNA catabolic process;GO:0003723//RNA binding;GO:0005524//ATP binding;GO:0003724//RNA helicase activity		K12598//ATP-dependent RNA helicase DOB1 [EC:3.6.4.13]+ko03018//RNA degradation;K12598//ATP-dependent RNA helicase DOB1 [EC:3.6.4.13]+ko03018//RNA degradation;K12598//ATP-dependent RNA helicase DOB1 [EC:3.6.4.13]+ko03018//RNA degradation;K12598//ATP-dependent RNA helicase DOB1 [EC:3.6.4.13]+ko03018//RNA degradation;K12598//ATP-dependent RNA helicase DOB1 [EC:3.6.4.13]+ko03018//RNA degradation
CL1349.Contig8_All	ko04340//Hedgehog signaling pathway;ko04979//Cholesterol metabolism;ko04918//Thyroid hormone synthesis	Signal transduction;Endocrine system;Digestive system	Environmental Information Processing;Organismal Systems	Novel_gene	2331	6.85	6.78	8.18	2.89	3.44	2.72	-1.26828	4.29562e-86	9.02548e-87		PREDICTED: vitellogenin receptor [Dufourea novaeangliae]	Low-density lipoprotein receptor domain class A	[T] KOG1215 Low-density lipoprotein receptors containing Ca2+-binding EGF-like domains	Very low-density lipoprotein receptor OS=Rattus norvegicus GN=Vldlr PE=2 SV=1			K06233//low density lipoprotein-related protein 2+ko04918//Thyroid hormone synthesis+ko04340//Hedgehog signaling pathway+ko04979//Cholesterol metabolism;K20053//very low-density lipoprotein receptor;K20053//very low-density lipoprotein receptor;K20053//very low-density lipoprotein receptor;K20053//very low-density lipoprotein receptor
CL1383.Contig2_All	ko03320//PPAR signaling pathway	Endocrine system	Organismal Systems	Novel_gene	985	7.24	11.15	13.33	6.34	5.93	3.13	-1.03022	8.85935e-37	3.771e-37		PREDICTED: lipid storage droplets surface-binding protein 1-like [Halyomorpha halys]	Perilipin family					K17284//perilipin-2+ko03320//PPAR signaling pathway;K17284//perilipin-2+ko03320//PPAR signaling pathway;K17284//perilipin-2+ko03320//PPAR signaling pathway;K17284//perilipin-2+ko03320//PPAR signaling pathway;K17284//perilipin-2+ko03320//PPAR signaling pathway
CL1411.Contig2_All	ko00630//Glyoxylate and dicarboxylate metabolism;ko00260//Glycine, serine and threonine metabolism;ko00670//One carbon pool by folate;ko01200//Carbon metabolism;ko01100//Metabolic pathways	Amino acid metabolism;Carbohydrate metabolism;Metabolism of cofactors and vitamins;Global and overview maps	Metabolism	Novel_gene	1492	10.79	3.09	3.5	2.81	3.21	1.03	-1.29426	4.40654e-45	1.6036e-45		Aminomethyltransferase, mitochondrial [Papilio machaon]	Aminomethyltransferase folate-binding domain	[E] KOG2770 Aminomethyl transferase	Aminomethyltransferase, mitochondrial OS=Bos taurus GN=AMT PE=1 SV=1			K00605//aminomethyltransferase [EC:2.1.2.10]+ko00670//One carbon pool by folate+ko01200//Carbon metabolism+ko00260//Glycine, serine and threonine metabolism+ko01100//Metabolic pathways+ko00630//Glyoxylate and dicarboxylate metabolism;K00605//aminomethyltransferase [EC:2.1.2.10]+ko00670//One carbon pool by folate+ko01200//Carbon metabolism+ko00260//Glycine, serine and threonine metabolism+ko01100/…
CL1411.Contig6_All	ko01200//Carbon metabolism;ko00260//Glycine, serine and threonine metabolism;ko00670//One carbon pool by folate;ko01100//Metabolic pathways;ko00630//Glyoxylate and dicarboxylate metabolism	Metabolism of cofactors and vitamins;Global and overview maps;Carbohydrate metabolism;Amino acid metabolism	Metabolism	Novel_gene	1431	192.8	120.4	60.68	57.73	43.86	15.36	-1.66227	0	0		PREDICTED: aminomethyltransferase, mitochondrial [Papilio machaon]	Aminomethyltransferase folate-binding domain	[E] KOG2770 Aminomethyl transferase	Aminomethyltransferase, mitochondrial OS=Bos taurus GN=AMT PE=1 SV=1			K00605//aminomethyltransferase [EC:2.1.2.10]+ko00670//One carbon pool by folate+ko01200//Carbon metabolism+ko00260//Glycine, serine and threonine metabolism+ko01100//Metabolic pathways+ko00630//Glyoxylate and dicarboxylate metabolism;K00605//aminomethyltransferase [EC:2.1.2.10]+ko00670//One carbon pool by folate+ko01200//Carbon metabolism+ko00260//Glycine, serine and threonine metabolism+ko01100/…
CL1413.Contig7_All	ko03040//Spliceosome	Transcription	Genetic Information Processing	Novel_gene	2585	2.61	4.5	14.19	2.23	1.82	3.79	-1.43754	1.29484e-112	2.11116e-113		PREDICTED: calcium homeostasis endoplasmic reticulum protein isoform X1 [Anoplophora glabripennis]	RNA polymerase II-binding domain.	[A] KOG1869 Splicing coactivator SRm160/300, subunit SRm300	Serine/arginine-rich splicing factor 7 OS=Bos taurus GN=SRSF7 PE=2 SV=1		CSD	K12841//calcium homeostasis endoplasmic reticulum protein+ko03040//Spliceosome;K12841//calcium homeostasis endoplasmic reticulum protein+ko03040//Spliceosome;K12841//calcium homeostasis endoplasmic reticulum protein+ko03040//Spliceosome;K12841//calcium homeostasis endoplasmic reticulum protein+ko03040//Spliceosome;K12841//calcium homeostasis endoplasmic reticulum protein+ko03040//Spliceosome
CL1457.Contig3_All	ko01100//Metabolic pathways;ko04727//GABAergic synapse;ko00790//Folate biosynthesis	Nervous system;Metabolism of cofactors and vitamins;Global and overview maps	Metabolism;Organismal Systems	Novel_gene	1225	231.63	337.67	307.6	159.74	75.64	100.87	-1.36538	0	0		PREDICTED: regulator of microtubule dynamics protein 1-like isoform X3 [Bemisia tabaci]	Tetratricopeptide repeat		Regulator of microtubule dynamics protein 1 OS=Bos taurus GN=RMDN1 PE=2 SV=1			K15376//gephyrin [EC:2.10.1.1 2.7.7.75]+ko04727//GABAergic synapse+ko01100//Metabolic pathways+ko00790//Folate biosynthesis
CL151.Contig4_All	ko05226//Gastric cancer;ko05146//Amoebiasis	Cancers: Specific types;Infectious diseases: Parasitic	Human Diseases	Novel_gene	3678	22.99	30.54	31.28	12.98	6.46	3.04	-1.89607	0	0		uncharacterized protein, partial [Leishmania mexicana MHOM/GT/2001/U1103] >CBZ40949.1 unnamed protein product, partial [Leishmania mexicana MHOM/GT/2001/U1103]		[T] KOG1187 Serine/threonine protein kinase	Mucin-2 OS=Homo sapiens GN=MUC2 PE=1 SV=2	GO:0010468//regulation of gene expression;GO:0003682//chromatin binding;GO:0016021//integral component of membrane		K22016//mucin-3/17;K10955//mucin-2+ko05226//Gastric cancer+ko05146//Amoebiasis;K10955//mucin-2+ko05226//Gastric cancer+ko05146//Amoebiasis;K22016//mucin-3/17;K10955//mucin-2+ko05226//Gastric cancer+ko05146//Amoebiasis
CL1510.Contig1_All	ko03320//PPAR signaling pathway;ko04931//Insulin resistance	Endocrine and metabolic diseases;Endocrine system	Human Diseases;Organismal Systems	Novel_gene	3124	37.49	22.25	43.11	13.36	9.39	13.69	-1.48956	0	0	XM_008211362.2 PREDICTED: Nasonia vitripennis long-chain fatty acid transport protein 4-like (LOC100120211), transcript variant X2, mRNA	PREDICTED: long-chain fatty acid transport protein 1-like [Polistes canadensis]	AMP-binding enzyme	[I] KOG1179 Very long-chain acyl-CoA synthetase/fatty acid transporter	Long-chain fatty acid transport protein 4 OS=Pongo abelii GN=SLC27A4 PE=2 SV=1	GO:0008152//metabolic process;GO:0003824//catalytic activity		K08745//solute carrier family 27 (fatty acid transporter), member 1/4 [EC:6.2.1.-]+ko03320//PPAR signaling pathway+ko04931//Insulin resistance;K08745//solute carrier family 27 (fatty acid transporter), member 1/4 [EC:6.2.1.-]+ko03320//PPAR signaling pathway+ko04931//Insulin resistance;K08745//solute carrier family 27 (fatty acid transporter), member 1/4 [EC:6.2.1.-]+ko03320//PPAR signaling pathwa…
CL1510.Contig4_All	ko04931//Insulin resistance;ko03320//PPAR signaling pathway	Endocrine and metabolic diseases;Endocrine system	Organismal Systems;Human Diseases	Novel_gene	4483	4.77	3.75	6.58	1.54	1.34	1.92	-1.65171	8.56871e-172	9.21137e-173	XM_008211362.2 PREDICTED: Nasonia vitripennis long-chain fatty acid transport protein 4-like (LOC100120211), transcript variant X2, mRNA	PREDICTED: long-chain fatty acid transport protein 1-like [Polistes canadensis]	AMP-binding enzyme	[I] KOG1179 Very long-chain acyl-CoA synthetase/fatty acid transporter	Long-chain fatty acid transport protein 4 OS=Pongo abelii GN=SLC27A4 PE=2 SV=1	GO:0008152//metabolic process;GO:0003824//catalytic activity		K08745//solute carrier family 27 (fatty acid transporter), member 1/4 [EC:6.2.1.-]+ko03320//PPAR signaling pathway+ko04931//Insulin resistance;K08745//solute carrier family 27 (fatty acid transporter), member 1/4 [EC:6.2.1.-]+ko03320//PPAR signaling pathway+ko04931//Insulin resistance;K08745//solute carrier family 27 (fatty acid transporter), member 1/4 [EC:6.2.1.-]+ko03320//PPAR signaling pathwa…
CL161.Contig5_All	ko00480//Glutathione metabolism;ko00590//Arachidonic acid metabolism;ko00981//Insect hormone biosynthesis;ko04918//Thyroid hormone synthesis;ko04216//Ferroptosis	Metabolism of terpenoids and polyketides;Cell growth and death;Metabolism of other amino acids;Lipid metabolism;Endocrine system	Organismal Systems;Cellular Processes;Metabolism	Novel_gene	1997	16.34	14.39	20.87	2.68	4.66	3.64	-2.2368	0	0		PREDICTED: probable phospholipid hydroperoxide glutathione peroxidase isoform X1 [Diaphorina citri] >XP_017298100.1 PREDICTED: probable phospholipid hydroperoxide glutathione peroxidase isoform X2 [Diaphorina citri]	Glutathione peroxidase	[O] KOG1651 Glutathione peroxidase	Glutathione peroxidase OS=Schistosoma mansoni GN=GPX1 PE=1 SV=2	GO:0006979//response to oxidative stress;GO:0004602//glutathione peroxidase activity;GO:0016021//integral component of membrane		K00432//glutathione peroxidase [EC:1.11.1.9]+ko04918//Thyroid hormone synthesis+ko00590//Arachidonic acid metabolism+ko00480//Glutathione metabolism;K00432//glutathione peroxidase [EC:1.11.1.9]+ko04918//Thyroid hormone synthesis+ko00590//Arachidonic acid metabolism+ko00480//Glutathione metabolism;K00432//glutathione peroxidase [EC:1.11.1.9]+ko04918//Thyroid hormone synthesis+ko00590//Arachidonic …
CL169.Contig7_All	ko00040//Pentose and glucuronate interconversions;ko01100//Metabolic pathways;ko00053//Ascorbate and aldarate metabolism;ko00140//Steroid hormone biosynthesis;ko00860//Porphyrin and chlorophyll metabolism;ko00830//Retinol metabolism;ko00983//Drug metabolism - other enzymes;ko05204//Chemical carcinogenesis;ko00980//Metabolism of xenobiotics by cytochrome P450;ko00982//Drug metabolism - cytochrome …	Xenobiotics biodegradation and metabolism;Metabolism of cofactors and vitamins;Lipid metabolism;Carbohydrate metabolism;Global and overview maps;Cancers: Overview	Human Diseases;Metabolism	Novel_gene	1589	4.28	3.52	3.69	1.4	1.45	1.41	-1.42452	3.29282e-37	1.38907e-37		UDP-glucuronosyltransferase 2B2-like isoform X1 [Myzus persicae]	UDP-glucoronosyl and UDP-glucosyl transferase	[GC] KOG1192 UDP-glucuronosyl and UDP-glucosyl transferase	UDP-glucuronosyltransferase 2B7 OS=Homo sapiens GN=UGT2B7 PE=1 SV=1			K00699//glucuronosyltransferase [EC:2.4.1.17]+ko00980//Metabolism of xenobiotics by cytochrome P450+ko00982//Drug metabolism - cytochrome P450+ko00983//Drug metabolism - other enzymes+ko00040//Pentose and glucuronate interconversions+ko00860//Porphyrin and chlorophyll metabolism+ko00053//Ascorbate and aldarate metabolism+ko00830//Retinol metabolism+ko05204//Chemical carcinogenesis+ko00140//Steroi…
CL1708.Contig5_All	ko04910//Insulin signaling pathway;ko00620//Pyruvate metabolism;ko01100//Metabolic pathways;ko00061//Fatty acid biosynthesis;ko01212//Fatty acid metabolism;ko00640//Propanoate metabolism;ko04152//AMPK signaling pathway;ko04922//Glucagon signaling pathway	Lipid metabolism;Carbohydrate metabolism;Signal transduction;Endocrine system;Global and overview maps	Environmental Information Processing;Metabolism;Organismal Systems	Novel_gene	8262	48.95	27.81	45.68	10.2	13.26	1.2	-2.30645	0	0	XM_015655289.1 PREDICTED: Neodiprion lecontei acetyl-CoA carboxylase (LOC107217669), transcript variant X5, mRNA	PREDICTED: acetyl-CoA carboxylase isoform X3 [Bemisia tabaci]	Acetyl-CoA carboxylase, central region	[I] KOG0368 Acetyl-CoA carboxylase	Acetyl-CoA carboxylase 1 OS=Mus musculus GN=Acaca PE=1 SV=1		zf-C2H2	K11262//acetyl-CoA carboxylase / biotin carboxylase 1 [EC:6.4.1.2 6.3.4.14 2.1.3.15]+ko04910//Insulin signaling pathway+ko00640//Propanoate metabolism+ko00061//Fatty acid biosynthesis+ko00620//Pyruvate metabolism+ko04152//AMPK signaling pathway+ko01100//Metabolic pathways+ko01212//Fatty acid metabolism+ko04922//Glucagon signaling pathway;K11262//acetyl-CoA carboxylase / biotin carboxylase 1 [EC:6…
CL1732.Contig1_All	ko01100//Metabolic pathways	Global and overview maps	Metabolism	Novel_gene	1084	9.77	11.46	8.12	5.11	3.03	4.07	-1.25256	4.23418e-51	1.39452e-51		peroxiredoxin-6 [Zootermopsis nevadensis] >KDR15106.1 Peroxiredoxin-6 [Zootermopsis nevadensis]	AhpC/TSA family	[O] KOG0854 Alkyl hydroperoxide reductase, thiol specific antioxidant and related enzymes	Peroxiredoxin-6 OS=Gallus gallus GN=PRDX6 PE=2 SV=3			K11188//peroxiredoxin 6, 1-Cys peroxiredoxin [EC:1.11.1.7 1.11.1.15 3.1.1.-]+ko01100//Metabolic pathways;K11188//peroxiredoxin 6, 1-Cys peroxiredoxin [EC:1.11.1.7 1.11.1.15 3.1.1.-]+ko01100//Metabolic pathways;K11188//peroxiredoxin 6, 1-Cys peroxiredoxin [EC:1.11.1.7 1.11.1.15 3.1.1.-]+ko01100//Metabolic pathways;K11188//peroxiredoxin 6, 1-Cys peroxiredoxin [EC:1.11.1.7 1.11.1.15 3.1.1.-]+ko01100…
CL1741.Contig5_All	ko01100//Metabolic pathways;ko05012//Parkinson disease;ko05010//Alzheimer disease;ko00190//Oxidative phosphorylation;ko04714//Thermogenesis;ko05016//Huntington disease;ko04260//Cardiac muscle contraction;ko04932//Non-alcoholic fatty liver disease (NAFLD)	Endocrine and metabolic diseases;Global and overview maps;Environmental adaptation;Circulatory system;Energy metabolism;Neurodegenerative diseases	Metabolism;Human Diseases;Organismal Systems	Novel_gene	4666	3.68	3.69	3.93	1.82	1.84	1.5	-1.12876	5.94434e-76	1.40144e-76	FQ377885.3 Zebrafish DNA sequence from clone CH1073-458B4 in linkage group 15, complete sequence	PREDICTED: cell growth regulator with RING finger domain protein 1-like isoform X1 [Cimex lectularius]	Zinc finger, C3HC4 type (RING finger)	[O] KOG0802 E3 ubiquitin ligase	RING finger protein 145 OS=Mus musculus GN=Rnf145 PE=2 SV=1	GO:0016021//integral component of membrane		K00411//ubiquinol-cytochrome c reductase iron-sulfur subunit [EC:7.1.1.8]+ko04260//Cardiac muscle contraction+ko04714//Thermogenesis+ko00190//Oxidative phosphorylation+ko04932//Non-alcoholic fatty liver disease (NAFLD)+ko05010//Alzheimer disease+ko05012//Parkinson disease+ko05016//Huntington disease+ko01100//Metabolic pathways;K15703//E3 ubiquitin-protein ligase RNF139 [EC:2.3.2.27];K15703//E3 ub…
CL1749.Contig2_All	ko04320//Dorso-ventral axis formation	Development	Organismal Systems	Novel_gene	2804	49.7	48.65	58.73	14.84	21	17.61	-1.55717	0	0		glycosphingolipid synthetase [Plutella xylostella]	Glycosyl transferase family group 2		Beta-1,4-mannosyltransferase egh OS=Drosophila melanogaster GN=egh PE=2 SV=1			K02359//egghead protein (zeste-white 4 protein)+ko04320//Dorso-ventral axis formation;K02359//egghead protein (zeste-white 4 protein)+ko04320//Dorso-ventral axis formation;K02359//egghead protein (zeste-white 4 protein)+ko04320//Dorso-ventral axis formation;K02359//egghead protein (zeste-white 4 protein)+ko04320//Dorso-ventral axis formation;K02359//egghead protein (zeste-white 4 protein)+ko04320…
CL1829.Contig8_All	ko01200//Carbon metabolism;ko01210//2-Oxocarboxylic acid metabolism;ko01100//Metabolic pathways;ko01230//Biosynthesis of amino acids;ko00020//Citrate cycle (TCA cycle)	Carbohydrate metabolism;Global and overview maps	Metabolism	Novel_gene	2477	32.56	20.93	22.45	7.01	6.75	5.34	-1.98609	0	0		PREDICTED: isocitrate dehydrogenase [NAD] subunit gamma, mitochondrial-like [Diaphorina citri]	Isocitrate/isopropylmalate dehydrogenase	[E] KOG0784 Isocitrate dehydrogenase, gamma subunit	Isocitrate dehydrogenase [NAD] subunit gamma, mitochondrial (Fragment) OS=Macaca fascicularis GN=IDH3G PE=2 SV=1	GO:0006099//tricarboxylic acid cycle;GO:0004449//isocitrate dehydrogenase (NAD+) activity		K00030//isocitrate dehydrogenase (NAD+) [EC:1.1.1.41]+ko01200//Carbon metabolism+ko01230//Biosynthesis of amino acids+ko00020//Citrate cycle (TCA cycle)+ko01100//Metabolic pathways+ko01210//2-Oxocarboxylic acid metabolism;K00030//isocitrate dehydrogenase (NAD+) [EC:1.1.1.41]+ko01200//Carbon metabolism+ko01230//Biosynthesis of amino acids+ko00020//Citrate cycle (TCA cycle)+ko01100//Metabolic pathw…
CL1835.Contig1_All	ko01100//Metabolic pathways;ko00500//Starch and sucrose metabolism	Carbohydrate metabolism;Global and overview maps	Metabolism	Novel_gene	3539	1.92	3.05	6.97	1.18	1.14	1.87	-1.51053	2.47349e-94	4.72652e-95	EF092085.1 Maconellicoccus hirsutus clone WHMH4108 putative trehalose-6-phosphate synthase 1 mRNA, partial cds	alpha,alpha-trehalose-phosphate synthase [UDP-forming]-like isoform X2 [Nilaparvata lugens] >AQT25641.1 trehalose-6-phosphate synthase 2, partial [Nilaparvata lugens]	Glycosyltransferase family 20	[G] KOG1050 Trehalose-6-phosphate synthase component TPS1 and related subunits	Alpha,alpha-trehalose-phosphate synthase [UDP-forming] 1 OS=Aphelenchus avenae GN=tps-1 PE=2 SV=1			K16055//trehalose 6-phosphate synthase/phosphatase [EC:2.4.1.15 3.1.3.12]+ko00500//Starch and sucrose metabolism+ko01100//Metabolic pathways;K16055//trehalose 6-phosphate synthase/phosphatase [EC:2.4.1.15 3.1.3.12]+ko00500//Starch and sucrose metabolism+ko01100//Metabolic pathways;K16055//trehalose 6-phosphate synthase/phosphatase [EC:2.4.1.15 3.1.3.12]+ko00500//Starch and sucrose metabolism+ko01…
CL1890.Contig4_All	ko00534//Glycosaminoglycan biosynthesis - heparan sulfate / heparin;ko01100//Metabolic pathways	Glycan biosynthesis and metabolism;Global and overview maps	Metabolism	Novel_gene	4371	11.76	14.32	17.38	6.6	3.55	11.33	-1.01453	1.97689e-226	1.603e-227	XM_022273668.1 PREDICTED: Pieris rapae exostosin-1 (LOC111003256), mRNA	PREDICTED: exostosin-1 [Cimex lectularius]	Glycosyl transferase family 64 domain	[GMW] KOG1021 Acetylglucosaminyltransferase EXT1/exostosin 1	Exostosin-1 OS=Drosophila melanogaster GN=ttv PE=1 SV=1			K02366//glucuronyl/N-acetylglucosaminyl transferase EXT1 [EC:2.4.1.224 2.4.1.225]+ko00534//Glycosaminoglycan biosynthesis - heparan sulfate / heparin+ko01100//Metabolic pathways;K02366//glucuronyl/N-acetylglucosaminyl transferase EXT1 [EC:2.4.1.224 2.4.1.225]+ko00534//Glycosaminoglycan biosynthesis - heparan sulfate / heparin+ko01100//Metabolic pathways;K02366//glucuronyl/N-acetylglucosaminyl tra…
CL1921.Contig2_All	ko05322//Systemic lupus erythematosus;ko05202//Transcriptional misregulation in cancer;ko05034//Alcoholism	Substance dependence;Immune diseases;Cancers: Overview	Human Diseases	Novel_gene	1422	26.04	51.38	59.6	8.54	20.88	21.38	-1.43909	0	0		uncharacterized protein Dana_GF20359 [Drosophila ananassae] >EDV44939.2 uncharacterized protein Dana_GF20359 [Drosophila ananassae]	Core histone H2A/H2B/H3/H4	[B] KOG1745 Histones H3 and H4	Histone H3, embryonic OS=Strongylocentrotus purpuratus PE=1 SV=2	GO:0003677//DNA binding;GO:0005634//nucleus;GO:0006334//nucleosome assembly;GO:0046982//protein heterodimerization activity;GO:0000786//nucleosome		K11253//histone H3+ko05322//Systemic lupus erythematosus+ko05034//Alcoholism+ko05202//Transcriptional misregulation in cancer;K11253//histone H3+ko05322//Systemic lupus erythematosus+ko05034//Alcoholism+ko05202//Transcriptional misregulation in cancer;K11253//histone H3+ko05322//Systemic lupus erythematosus+ko05034//Alcoholism+ko05202//Transcriptional misregulation in cancer;K11253//histone H3+ko…
CL1932.Contig3_All	ko04810//Regulation of actin cytoskeleton	Cell motility	Cellular Processes	Novel_gene	2791	26.11	20.46	24.6	9.55	8.19	6.41	-1.55162	0	0		rho guanine nucleotide exchange factor 7 isoform X4 [Zootermopsis nevadensis]	RhoGEF domain	[F] KOG2070 Guanine nucleotide exchange factor	Rho guanine nucleotide exchange factor 7 OS=Homo sapiens GN=ARHGEF7 PE=1 SV=2			K13710//Rho guanine nucleotide exchange factor 7+ko04810//Regulation of actin cytoskeleton;K13710//Rho guanine nucleotide exchange factor 7+ko04810//Regulation of actin cytoskeleton;K13710//Rho guanine nucleotide exchange factor 7+ko04810//Regulation of actin cytoskeleton;K13710//Rho guanine nucleotide exchange factor 7+ko04810//Regulation of actin cytoskeleton;K13710//Rho guanine nucleotide exch…
CL1953.Contig2_All	ko03008//Ribosome biogenesis in eukaryotes;ko03013//RNA transport;ko05166//Human T-cell leukemia virus 1 infection	Translation;Infectious diseases: Viral	Genetic Information Processing;Human Diseases	Novel_gene	1599	2.95	7.01	9.69	2.75	3.09	2.42	-1.24706	1.6599e-51	5.44339e-52		PREDICTED: protein takeout-like [Diuraphis noxia]	Haemolymph juvenile hormone binding protein (JHBP)		Protein takeout OS=Drosophila melanogaster GN=to PE=2 SV=1			K07936//GTP-binding nuclear protein Ran+ko03013//RNA transport+ko03008//Ribosome biogenesis in eukaryotes+ko05166//Human T-cell leukemia virus 1 infection
CL1967.Contig1_All	ko03010//Ribosome	Translation	Genetic Information Processing	Novel_gene	981	42.22	50.35	38.63	18.49	20.13	13.01	-1.33819	2.76589e-221	2.28787e-222	XM_002428015.1 Pediculus humanus corporis 60S ribosomal protein L13, putative, mRNA	putative ribosomal protein L13 [Maconellicoccus hirsutus]	Ribosomal protein L13e	[J] KOG3295 60S Ribosomal protein L13	60S ribosomal protein L13 OS=Spodoptera frugiperda GN=RpL13 PE=2 SV=1	GO:0005840//ribosome;GO:0006412//translation;GO:0003735//structural constituent of ribosome		K02873//large subunit ribosomal protein L13e+ko03010//Ribosome;K02873//large subunit ribosomal protein L13e+ko03010//Ribosome;K02873//large subunit ribosomal protein L13e+ko03010//Ribosome;K02873//large subunit ribosomal protein L13e+ko03010//Ribosome;K02873//large subunit ribosomal protein L13e+ko03010//Ribosome
CL1978.Contig4_All	ko00100//Steroid biosynthesis;ko04972//Pancreatic secretion;ko00983//Drug metabolism - other enzymes;ko00564//Glycerophospholipid metabolism;ko04725//Cholinergic synapse;ko04975//Fat digestion and absorption;ko01100//Metabolic pathways;ko00561//Glycerolipid metabolism	Xenobiotics biodegradation and metabolism;Digestive system;Global and overview maps;Nervous system;Lipid metabolism	Metabolism;Organismal Systems	Novel_gene	1726	2.02	2.74	3.25	1.21	1.44	1.01	-1.12907	1.76321e-20	1.13325e-20		carboxylesterase [Aphis gossypii]	Carboxylesterase family	[R] KOG1516 Carboxylesterase and related proteins	Esterase FE4 OS=Myzus persicae PE=1 SV=1			K12298//bile salt-stimulated lipase [EC:3.1.1.3 3.1.1.13]+ko04975//Fat digestion and absorption+ko04972//Pancreatic secretion+ko00100//Steroid biosynthesis+ko00561//Glycerolipid metabolism+ko01100//Metabolic pathways;K03927//carboxylesterase 2 [EC:3.1.1.1 3.1.1.84 3.1.1.56]+ko00983//Drug metabolism - other enzymes;K01049//acetylcholinesterase [EC:3.1.1.7]+ko04725//Cholinergic synapse+ko00564//Gly…
CL1978.Contig5_All	ko01100//Metabolic pathways;ko04725//Cholinergic synapse;ko04972//Pancreatic secretion;ko04975//Fat digestion and absorption;ko00561//Glycerolipid metabolism;ko00100//Steroid biosynthesis;ko00564//Glycerophospholipid metabolism;ko00983//Drug metabolism - other enzymes	Xenobiotics biodegradation and metabolism;Lipid metabolism;Nervous system;Digestive system;Global and overview maps	Organismal Systems;Metabolism	Novel_gene	1881	5.41	3.39	3.38	1.48	1.75	1.71	-1.30032	7.67849e-41	3.00546e-41		carboxylesterase [Aphis gossypii]	Carboxylesterase family	[R] KOG1516 Carboxylesterase and related proteins	Esterase FE4 OS=Myzus persicae PE=1 SV=1			K12298//bile salt-stimulated lipase [EC:3.1.1.3 3.1.1.13]+ko04975//Fat digestion and absorption+ko04972//Pancreatic secretion+ko00100//Steroid biosynthesis+ko00561//Glycerolipid metabolism+ko01100//Metabolic pathways;K03927//carboxylesterase 2 [EC:3.1.1.1 3.1.1.84 3.1.1.56]+ko00983//Drug metabolism - other enzymes;K01049//acetylcholinesterase [EC:3.1.1.7]+ko04725//Cholinergic synapse+ko00564//Gly…
CL2002.Contig2_All	ko04810//Regulation of actin cytoskeleton;ko04933//AGE-RAGE signaling pathway in diabetic complications;ko04510//Focal adhesion;ko05131//Shigellosis	Endocrine and metabolic diseases;Infectious diseases: Bacterial;Cell motility;Cellular community - eukaryotes	Cellular Processes;Human Diseases	Novel_gene	1474	10.9	7.91	8.85	5.09	3.04	5.05	-1.05851	3.65748e-51	1.20299e-51		PREDICTED: formin-J-like isoform X1 [Diuraphis noxia]		[TZ] KOG1922 Rho GTPase effector BNI1 and related formins	Protein cappuccino OS=Drosophila melanogaster GN=capu PE=1 SV=2		zf-C2H2	K05740//diaphanous 1+ko05131//Shigellosis+ko04810//Regulation of actin cytoskeleton+ko04510//Focal adhesion+ko04933//AGE-RAGE signaling pathway in diabetic complications;K05741//diaphanous 2+ko04810//Regulation of actin cytoskeleton;K05741//diaphanous 2+ko04810//Regulation of actin cytoskeleton;K05741//diaphanous 2+ko04810//Regulation of actin cytoskeleton;K05741//diaphanous 2+ko04810//Regulation…
CL2009.Contig2_All	ko04141//Protein processing in endoplasmic reticulum	Folding, sorting and degradation	Genetic Information Processing	Novel_gene	1606	3.73	3.46	5.52	1.54	2.84	1.55	-1.10308	2.64679e-28	1.36454e-28	LM993668.1 Plasmodium yoelii genome assembly PY17X01, chromosome : 14	PREDICTED: kinectin isoform X2 [Camponotus floridanus]	TPR/MLP1/MLP2-like protein	[J] LSE3605 H Ribosome binding protein	Ribosome-binding protein 1 OS=Mus musculus GN=Rrbp1 PE=1 SV=2			K14000//ribosome-binding protein 1+ko04141//Protein processing in endoplasmic reticulum;K14000//ribosome-binding protein 1+ko04141//Protein processing in endoplasmic reticulum;K14000//ribosome-binding protein 1+ko04141//Protein processing in endoplasmic reticulum;K14000//ribosome-binding protein 1+ko04141//Protein processing in endoplasmic reticulum;K14000//ribosome-binding protein 1+ko04141//Pro…
CL2013.Contig1_All	ko00920//Sulfur metabolism;ko01100//Metabolic pathways	Global and overview maps;Energy metabolism	Metabolism	Novel_gene	1370	25.09	15.85	16.4	5.4	4.53	5.17	-1.91805	2.55112e-233	2.01594e-234		PREDICTED: 3'(2'),5'-bisphosphate nucleotidase 1 [Microplitis demolitor]	Inositol monophosphatase family	[F] KOG3099 Bisphosphate 3'-nucleotidase BPNT1/Inositol polyphosphate 1-phosphatase	3'(2'),5'-bisphosphate nucleotidase 1 OS=Homo sapiens GN=BPNT1 PE=1 SV=1	GO:0008441//3'(2'),5'-bisphosphate nucleotidase activity;GO:0046854//phosphatidylinositol phosphorylation		K01082//3'(2'), 5'-bisphosphate nucleotidase [EC:3.1.3.7]+ko00920//Sulfur metabolism+ko01100//Metabolic pathways;K01082//3'(2'), 5'-bisphosphate nucleotidase [EC:3.1.3.7]+ko00920//Sulfur metabolism+ko01100//Metabolic pathways;K01082//3'(2'), 5'-bisphosphate nucleotidase [EC:3.1.3.7]+ko00920//Sulfur metabolism+ko01100//Metabolic pathways;K01082//3'(2'), 5'-bisphosphate nucleotidase [EC:3.1.3.7]+ko…
CL204.Contig1_All	ko03060//Protein export	Folding, sorting and degradation	Genetic Information Processing	Novel_gene	646	10.05	5.62	7.89	5.95	2.82	2.33	-1.05653	1.56468e-18	1.07538e-18		PREDICTED: signal recognition particle 9 kDa protein [Neodiprion lecontei]		[U] KOG3465 Signal recognition particle, subunit Srp9				K03109//signal recognition particle subunit SRP9+ko03060//Protein export;K03109//signal recognition particle subunit SRP9+ko03060//Protein export;K03109//signal recognition particle subunit SRP9+ko03060//Protein export;K03109//signal recognition particle subunit SRP9+ko03060//Protein export;K03109//signal recognition particle subunit SRP9+ko03060//Protein export
CL2045.Contig1_All	ko00600//Sphingolipid metabolism;ko04071//Sphingolipid signaling pathway;ko01100//Metabolic pathways	Lipid metabolism;Signal transduction;Global and overview maps	Environmental Information Processing;Metabolism	Novel_gene	1255	2.8	3.5	2.11	1.03	1.04	2.06	-1.02394	1.17085e-13	9.72064e-14		phosphatidylcholine:ceramide cholinephosphotransferase 1-like [Nilaparvata lugens]	PAP2 superfamily C-terminal	[S] KOG3058 Uncharacterized conserved protein	Phosphatidylcholine:ceramide cholinephosphotransferase 2 OS=Rattus norvegicus GN=Sgms2 PE=1 SV=2			K04714//shingomyelin synthase [EC:2.7.8.27]+ko04071//Sphingolipid signaling pathway+ko00600//Sphingolipid metabolism+ko01100//Metabolic pathways;K04714//shingomyelin synthase [EC:2.7.8.27]+ko04071//Sphingolipid signaling pathway+ko00600//Sphingolipid metabolism+ko01100//Metabolic pathways;K04714//shingomyelin synthase [EC:2.7.8.27]+ko04071//Sphingolipid signaling pathway+ko00600//Sphingolipid met…
CL2064.Contig4_All	ko04530//Tight junction;ko05165//Human papillomavirus infection;ko04015//Rap1 signaling pathway;ko04151//PI3K-Akt signaling pathway;ko00982//Drug metabolism - cytochrome P450	Xenobiotics biodegradation and metabolism;Cellular community - eukaryotes;Signal transduction;Infectious diseases: Viral	Human Diseases;Metabolism;Environmental Information Processing;Cellular Processes	Novel_gene	1682	7.5	4.92	5.96	3.14	2.11	2.92	-1.16226	1.07952e-45	3.88512e-46		flavin-containing monooxygenase FMO GS-OX5-like isoform X1 [Nilaparvata lugens] >XP_022193189.1 flavin-containing monooxygenase FMO GS-OX5-like isoform X1 [Nilaparvata lugens] >XP_022193190.1 flavin-containing monooxygenase FMO GS-OX5-like isoform X1 [Nilaparvata lugens]	Flavin-binding monooxygenase-like	[Q] KOG1399 Flavin-containing monooxygenase	Dimethylaniline monooxygenase [N-oxide-forming] 5 OS=Homo sapiens GN=FMO5 PE=1 SV=2			K05631//atrophin-1 interacting protein 3 (BAI1-associated protein 1)+ko04530//Tight junction+ko04151//PI3K-Akt signaling pathway+ko04015//Rap1 signaling pathway+ko05165//Human papillomavirus infection;K00485//dimethylaniline monooxygenase (N-oxide forming) [EC:1.14.13.8]+ko00982//Drug metabolism - cytochrome P450;K00485//dimethylaniline monooxygenase (N-oxide forming) [EC:1.14.13.8]+ko00982//Drug…
CL2092.Contig2_All	ko01100//Metabolic pathways;ko00563//Glycosylphosphatidylinositol (GPI)-anchor biosynthesis	Glycan biosynthesis and metabolism;Global and overview maps	Metabolism	Novel_gene	1058	32.36	31.96	27.29	12.84	1.52	16.89	-1.53524	2.01091e-206	1.78577e-207		PREDICTED: phosphatidylinositol N-acetylglucosaminyltransferase subunit P isoform X1 [Bemisia tabaci]	PIG-P	[S] KOG2257 N-acetylglucosaminyltransferase complex, subunit PIG-P, required for phosphatidylinositol biosynthesis	Phosphatidylinositol N-acetylglucosaminyltransferase subunit P OS=Mus musculus GN=Pigp PE=2 SV=1	GO:0006506//GPI anchor biosynthetic process;GO:0017176//phosphatidylinositol N-acetylglucosaminyltransferase activity;GO:0016021//integral component of membrane		K03861//phosphatidylinositol glycan, class P+ko00563//Glycosylphosphatidylinositol (GPI)-anchor biosynthesis+ko01100//Metabolic pathways;K03861//phosphatidylinositol glycan, class P+ko00563//Glycosylphosphatidylinositol (GPI)-anchor biosynthesis+ko01100//Metabolic pathways;K03861//phosphatidylinositol glycan, class P+ko00563//Glycosylphosphatidylinositol (GPI)-anchor biosynthesis+ko01100//Metabol…
CL2139.Contig2_All	ko04068//FoxO signaling pathway;ko04611//Platelet activation;ko04140//Autophagy - animal;ko05221//Acute myeloid leukemia;ko04710//Circadian rhythm;ko05168//Herpes simplex infection;ko04713//Circadian entrainment;ko04923//Regulation of lipolysis in adipocytes;ko04974//Protein digestion and absorption;ko04213//Longevity regulating pathway - multiple species;ko05146//Amoebiasis;ko04022//cGMP-PKG sig…	Immune system;Environmental adaptation;Infectious diseases: Viral;Signal transduction;Transport and catabolism;Aging;Endocrine and metabolic diseases;Digestive system;Infectious diseases: Parasitic;Cancers: Specific types;Cancers: Overview;Endocrine system	Human Diseases;Environmental Information Processing;Cellular Processes;Organismal Systems	Novel_gene	1075	3	4.91	5.07	2.47	1.6	1.81	-1.12732	5.64836e-20	3.70213e-20		fibroin heavy chain-like [Nilaparvata lugens]	Modulator of levamisole receptor-1	[O] KOG1283 Serine carboxypeptidases	Keratin, type I cytoskeletal 9 OS=Canis lupus familiaris GN=KRT9 PE=3 SV=1		zf-C2H2	K19475//WAS/WASL-interacting protein+ko04144//Endocytosis;K19720//collagen, type III, alpha+ko04933//AGE-RAGE signaling pathway in diabetic complications+ko04611//Platelet activation+ko05146//Amoebiasis+ko04974//Protein digestion and absorption+ko04926//Relaxin signaling pathway;K19720//collagen, type III, alpha+ko04933//AGE-RAGE signaling pathway in diabetic complications+ko04611//Platelet activ…
CL2144.Contig2_All	ko01100//Metabolic pathways;ko00052//Galactose metabolism;ko00010//Glycolysis / Gluconeogenesis	Carbohydrate metabolism;Global and overview maps	Metabolism	Novel_gene	3232	20.39	23.28	27.03	10.27	4.14	6.48	-1.74394	0	0		serine/threonine-protein kinase VRK1-like [Nilaparvata lugens] >XP_022188226.1 serine/threonine-protein kinase VRK1-like [Nilaparvata lugens]	Aldose 1-epimerase	[T] KOG1164 Casein kinase (serine/threonine/tyrosine protein kinase)	Aldose 1-epimerase OS=Pongo abelii GN=GALM PE=2 SV=1	GO:0005524//ATP binding;GO:0004672//protein kinase activity		K08816//vaccinia related kinase [EC:2.7.11.1];K01785//aldose 1-epimerase [EC:5.1.3.3]+ko00010//Glycolysis / Gluconeogenesis+ko00052//Galactose metabolism+ko01100//Metabolic pathways;K08816//vaccinia related kinase [EC:2.7.11.1];K01785//aldose 1-epimerase [EC:5.1.3.3]+ko00010//Glycolysis / Gluconeogenesis+ko00052//Galactose metabolism+ko01100//Metabolic pathways
CL215.Contig14_All	ko01100//Metabolic pathways;ko00260//Glycine, serine and threonine metabolism	Global and overview maps;Amino acid metabolism	Metabolism	Novel_gene	2953	31.71	32.19	25.59	11.22	6.25	12.14	-1.58928	0	0		sarcosine dehydrogenase, mitochondrial-like [Zootermopsis nevadensis] >XP_021922573.1 sarcosine dehydrogenase, mitochondrial-like [Zootermopsis nevadensis] >XP_021922574.1 sarcosine dehydrogenase, mitochondrial-like [Zootermopsis nevadensis] >XP_021922576.1 sarcosine dehydrogenase, mitochondrial-like [Zootermopsis nevadensis]	FAD dependent oxidoreductase	[E] KOG2844 Dimethylglycine dehydrogenase precursor	Sarcosine dehydrogenase, mitochondrial OS=Rattus norvegicus GN=Sardh PE=1 SV=2			K00314//sarcosine dehydrogenase [EC:1.5.8.3]+ko00260//Glycine, serine and threonine metabolism+ko01100//Metabolic pathways;K00314//sarcosine dehydrogenase [EC:1.5.8.3]+ko00260//Glycine, serine and threonine metabolism+ko01100//Metabolic pathways;K00314//sarcosine dehydrogenase [EC:1.5.8.3]+ko00260//Glycine, serine and threonine metabolism+ko01100//Metabolic pathways;K00314//sarcosine dehydrogenas…
CL2171.Contig3_All	ko01040//Biosynthesis of unsaturated fatty acids;ko00062//Fatty acid elongation;ko01100//Metabolic pathways;ko01212//Fatty acid metabolism	Global and overview maps;Lipid metabolism	Metabolism	Novel_gene	1609	24.08	22.63	28.7	12.3	9.95	6.91	-1.35922	6.48785e-222	5.35953e-223		elongation of very long chain fatty acids protein 6 isoform X1 [Myzus persicae]	GNS1/SUR4 family	[I] KOG3072 Long chain fatty acid elongase	Elongation of very long chain fatty acids protein 6 OS=Gallus gallus GN=ELOVL6 PE=2 SV=1	GO:0102336//3-oxo-arachidoyl-CoA synthase activity;GO:0102756//very-long-chain 3-ketoacyl-CoA synthase activity;GO:0102337//3-oxo-cerotoyl-CoA synthase activity;GO:0016021//integral component of membrane;GO:0006633//fatty acid biosynthetic process;GO:0102338//3-oxo-lignoceronyl-CoA synthase activity		K10203//elongation of very long chain fatty acids protein 6 [EC:2.3.1.199]+ko01040//Biosynthesis of unsaturated fatty acids+ko00062//Fatty acid elongation+ko01100//Metabolic pathways+ko01212//Fatty acid metabolism;K10203//elongation of very long chain fatty acids protein 6 [EC:2.3.1.199]+ko01040//Biosynthesis of unsaturated fatty acids+ko00062//Fatty acid elongation+ko01100//Metabolic pathways+ko…
CL219.Contig5_All	ko04973//Carbohydrate digestion and absorption;ko00052//Galactose metabolism;ko01100//Metabolic pathways	Carbohydrate metabolism;Global and overview maps;Digestive system	Metabolism;Organismal Systems	Novel_gene	1800	136.88	43.54	6.13	13.45	20.95	30.53	-1.52968	0	0	AC147105.2 Mus musculus BAC clone RP24-66E5 from chromosome Y, complete sequence	myrosinase 1-like isoform X1 [Nilaparvata lugens]	Glycosyl hydrolase family 1	[G] KOG0626 Beta-glucosidase, lactase phlorizinhydrolase, and related proteins	Myrosinase 1 OS=Brevicoryne brassicae PE=1 SV=1			K01229//lactase-phlorizin hydrolase [EC:3.2.1.108 3.2.1.62]+ko00052//Galactose metabolism+ko04973//Carbohydrate digestion and absorption+ko01100//Metabolic pathways;K01229//lactase-phlorizin hydrolase [EC:3.2.1.108 3.2.1.62]+ko00052//Galactose metabolism+ko04973//Carbohydrate digestion and absorption+ko01100//Metabolic pathways;K01229//lactase-phlorizin hydrolase [EC:3.2.1.108 3.2.1.62]+ko00052//…
CL2194.Contig1_All	ko04142//Lysosome;ko04979//Cholesterol metabolism;ko00100//Steroid biosynthesis	Digestive system;Lipid metabolism;Transport and catabolism	Organismal Systems;Metabolism;Cellular Processes	Novel_gene	1535	8.17	11.46	6.5	1.9	1.17	4.47	-1.79355	1.38829e-110	2.31181e-111		PREDICTED: lipase 3 [Microplitis demolitor]	Apolipoprotein A1/A4/E domain	[I] KOG2624 Triglyceride lipase-cholesterol esterase	Lipase 1 OS=Drosophila melanogaster GN=Lip1 PE=2 SV=2			K01052//lysosomal acid lipase/cholesteryl ester hydrolase [EC:3.1.1.13]+ko04142//Lysosome+ko04979//Cholesterol metabolism+ko00100//Steroid biosynthesis;K01052//lysosomal acid lipase/cholesteryl ester hydrolase [EC:3.1.1.13]+ko04142//Lysosome+ko04979//Cholesterol metabolism+ko00100//Steroid biosynthesis;K01052//lysosomal acid lipase/cholesteryl ester hydrolase [EC:3.1.1.13]+ko04142//Lysosome+ko049…
CL2216.Contig2_All	ko00561//Glycerolipid metabolism;ko01100//Metabolic pathways;ko00830//Retinol metabolism;ko04977//Vitamin digestion and absorption;ko04975//Fat digestion and absorption	Digestive system;Metabolism of cofactors and vitamins;Global and overview maps;Lipid metabolism	Organismal Systems;Metabolism	Novel_gene	1386	1.45	20.96	2.43	4.24	2.36	1.74	-1.56203	3.53146e-78	8.08782e-79		2-acylglycerol O-acyltransferase 2-A-like [Nilaparvata lugens]	Diacylglycerol acyltransferase	[I] KOG0831 Acyl-CoA:diacylglycerol acyltransferase (DGAT)	Acyl-CoA wax alcohol acyltransferase 2 OS=Mus musculus GN=Awat2 PE=2 SV=1	GO:0010025//wax biosynthetic process;GO:0016021//integral component of membrane;GO:0016747//transferase activity, transferring acyl groups other than amino-acyl groups;GO:0005789//endoplasmic reticulum membrane		K11156//diacylglycerol O-acyltransferase 2-like protein 4 [EC:2.3.1.75 2.3.1.76]+ko00830//Retinol metabolism+ko04977//Vitamin digestion and absorption;K11156//diacylglycerol O-acyltransferase 2-like protein 4 [EC:2.3.1.75 2.3.1.76]+ko00830//Retinol metabolism+ko04977//Vitamin digestion and absorption;K11160//diacylglycerol O-acyltransferase 2 [EC:2.3.1.20 2.3.1.75]+ko04975//Fat digestion and abso…
CL2227.Contig1_All	ko04144//Endocytosis	Transport and catabolism	Cellular Processes	Novel_gene	2121	13.65	10.95	12.76	7.01	4.15	6.84	-1.04417	1.15875e-97	2.15503e-98		PREDICTED: rab11 family-interacting protein 1 isoform X2 [Bemisia tabaci]	FIP domain	[T] TWOG0552 Rab-interacting recycling protein	Rab11 family-interacting protein 2 OS=Mus musculus GN=Rab11fip2 PE=1 SV=1			K12484//Rab11 family-interacting protein 1/2/5+ko04144//Endocytosis;K12484//Rab11 family-interacting protein 1/2/5+ko04144//Endocytosis;K12484//Rab11 family-interacting protein 1/2/5+ko04144//Endocytosis;K12484//Rab11 family-interacting protein 1/2/5+ko04144//Endocytosis;K12484//Rab11 family-interacting protein 1/2/5+ko04144//Endocytosis
CL2293.Contig2_All	ko05215//Prostate cancer;ko05164//Influenza A;ko05202//Transcriptional misregulation in cancer	Infectious diseases: Viral;Cancers: Overview;Cancers: Specific types	Human Diseases	Novel_gene	1089	7.18	4.55	7.42	2.2	3.08	3.45	-1.13289	2.88206e-29	1.45387e-29		PREDICTED: trypsin-1, partial [Acyrthosiphon pisum]	Trypsin	[E] KOG3627 Trypsin	Serine proteinase stubble OS=Drosophila melanogaster GN=Sb PE=2 SV=2			K09626//brain-specific serine protease 4 [EC:3.4.21.-];K09640//transmembrane protease serine 9 [EC:3.4.21.-];K01317//acrosin [EC:3.4.21.10];K08648//hyaluronan binding protein 2 [EC:3.4.21.-];K09633//transmembrane protease serine 2 [EC:3.4.21.-]+ko05215//Prostate cancer+ko05202//Transcriptional misregulation in cancer+ko05164//Influenza A
CL2330.Contig3_All	ko04974//Protein digestion and absorption;ko04919//Thyroid hormone signaling pathway	Digestive system;Endocrine system	Organismal Systems	Novel_gene	3002	23.31	20.2	22.36	8.86	6.29	8.39	-1.47839	0	0	HE601631.1 Schistosoma mansoni strain Puerto Rico chromosome W, complete genome	deoxyhypusine hydroxylase-like protein [Lasius niger]	HEAT repeats	[R] KOG0567 HEAT repeat-containing protein	Deoxyhypusine hydroxylase OS=Danio rerio GN=dohh PE=2 SV=1	GO:0046872//metal ion binding;GO:0042406//extrinsic component of endoplasmic reticulum membrane;GO:0008283//cell proliferation;GO:0019135//deoxyhypusine monooxygenase activity;GO:0010508//positive regulation of autophagy;GO:0016049//cell growth;GO:0008612//peptidyl-lysine modification to peptidyl-hypusine		K06072//deoxyhypusine monooxygenase [EC:1.14.99.29];K06072//deoxyhypusine monooxygenase [EC:1.14.99.29];K06072//deoxyhypusine monooxygenase [EC:1.14.99.29];K06072//deoxyhypusine monooxygenase [EC:1.14.99.29];K08187//MFS transporter, MCP family, solute carrier family 16 (monocarboxylic acid transporters), member 10+ko04919//Thyroid hormone signaling pathway+ko04974//Protein digestion and absorption
CL2339.Contig1_All	ko03040//Spliceosome	Transcription	Genetic Information Processing	Novel_gene	598	7.13	18.26	17.01	2.07	6.2	6.73	-1.50413	7.83691e-50	2.62877e-50		PREDICTED: biorientation of chromosomes in cell division protein 1-like 1 isoform X1 [Callorhinchus milii]	Coiled-coil domain-containing protein 190	[G] KOG2806 Chitinase	Micronuclear linker histone polyprotein OS=Tetrahymena thermophila (strain SB210) GN=MLH PE=1 SV=2			K10624//E3 ubiquitin-protein ligase RBBP6 [EC:2.3.2.27];K17498//transcription factor SPN1;K12811//ATP-dependent RNA helicase DDX46/PRP5 [EC:3.6.4.13]+ko03040//Spliceosome;K17552//protein phosphatase 1 regulatory subunit 10
CL2404.Contig1_All	ko04621//NOD-like receptor signaling pathway;ko04924//Renin secretion;ko04140//Autophagy - animal;ko04210//Apoptosis;ko04612//Antigen processing and presentation;ko04142//Lysosome	Cell growth and death;Transport and catabolism;Endocrine system;Immune system	Organismal Systems;Cellular Processes	Novel_gene	1266	15.69	24.76	10.05	6.52	9.03	7.5	-1.13308	1.29093e-87	2.66184e-88		papain family cysteine protease [Oesophagostomum dentatum]	Papain family cysteine protease	[O] KOG1543 Cysteine proteinase Cathepsin L	Cathepsin B OS=Sus scrofa GN=CTSB PE=1 SV=1			K01363//cathepsin B [EC:3.4.22.1]+ko04140//Autophagy - animal+ko04142//Lysosome+ko04210//Apoptosis+ko04612//Antigen processing and presentation+ko04621//NOD-like receptor signaling pathway+ko04924//Renin secretion;K01363//cathepsin B [EC:3.4.22.1]+ko04140//Autophagy - animal+ko04142//Lysosome+ko04210//Apoptosis+ko04612//Antigen processing and presentation+ko04621//NOD-like receptor signaling path…
CL2413.Contig2_All	ko00564//Glycerophospholipid metabolism	Lipid metabolism	Metabolism	Novel_gene	5033	11.04	9.91	11.17	5.33	2.13	4.72	-1.38816	0	0	XM_017914592.1 PREDICTED: Nicrophorus vespilloides neuropathy target esterase sws (LOC108557885), transcript variant X3, mRNA	neuropathy target esterase sws isoform X6 [Zootermopsis nevadensis]	Cyclic nucleotide-binding domain	[R] KOG2968 Predicted esterase of the alpha-beta hydrolase superfamily (Neuropathy target esterase), contains cAMP-binding domains	Neuropathy target esterase sws OS=Drosophila pseudoobscura pseudoobscura GN=sws PE=3 SV=1			K14676//lysophospholipid hydrolase [EC:3.1.1.5]+ko00564//Glycerophospholipid metabolism;K14676//lysophospholipid hydrolase [EC:3.1.1.5]+ko00564//Glycerophospholipid metabolism;K14676//lysophospholipid hydrolase [EC:3.1.1.5]+ko00564//Glycerophospholipid metabolism;K14676//lysophospholipid hydrolase [EC:3.1.1.5]+ko00564//Glycerophospholipid metabolism;K14676//lysophospholipid hydrolase [EC:3.1.1.5]…
CL2432.Contig1_All	ko05014//Amyotrophic lateral sclerosis (ALS);ko05130//Pathogenic Escherichia coli infection	Infectious diseases: Bacterial;Neurodegenerative diseases	Human Diseases	Novel_gene	6548	6.82	6.35	6.85	3.09	2.86	3.72	-1.04976	6.64445e-167	7.3089e-168	XM_001847947.1 Culex quinquefasciatus conserved hypothetical protein, mRNA	uncharacterized protein LOC111033097 isoform X2 [Myzus persicae]	BAH domain	[K] KOG1886 BAH domain proteins	Uncharacterized protein DDB_G0286299 OS=Dictyostelium discoideum GN=DDB_G0286299 PE=4 SV=1	GO:0003682//chromatin binding	Tub	K11294//nucleolin+ko05130//Pathogenic Escherichia coli infection;K18626//trichohyalin;K04574//neurofilament heavy polypeptide+ko05014//Amyotrophic lateral sclerosis (ALS);K04574//neurofilament heavy polypeptide+ko05014//Amyotrophic lateral sclerosis (ALS);K04574//neurofilament heavy polypeptide+ko05014//Amyotrophic lateral sclerosis (ALS)
CL2468.Contig2_All	ko05226//Gastric cancer;ko05225//Hepatocellular carcinoma;ko05217//Basal cell carcinoma;ko05224//Breast cancer;ko05200//Pathways in cancer;ko04934//Cushing syndrome;ko04310//Wnt signaling pathway;ko04390//Hippo signaling pathway;ko05165//Human papillomavirus infection;ko05213//Endometrial cancer;ko04550//Signaling pathways regulating pluripotency of stem cells;ko05210//Colorectal cancer	Endocrine and metabolic diseases;Signal transduction;Cancers: Overview;Cellular community - eukaryotes;Cancers: Specific types;Infectious diseases: Viral	Human Diseases;Environmental Information Processing;Cellular Processes	Novel_gene	3504	10.38	8.73	7.52	4.14	2.2	6.12	-1.09221	1.3817e-125	2.02299e-126		axin isoform X2 [Zootermopsis nevadensis]	DIX domain	[T] KOG3589 G protein signaling regulators	Axin OS=Drosophila melanogaster GN=Axn PE=1 SV=1			K02157//axin 1+ko04390//Hippo signaling pathway+ko05226//Gastric cancer+ko05225//Hepatocellular carcinoma+ko04550//Signaling pathways regulating pluripotency of stem cells+ko04310//Wnt signaling pathway+ko05217//Basal cell carcinoma+ko05213//Endometrial cancer+ko05210//Colorectal cancer+ko05200//Pathways in cancer+ko05224//Breast cancer+ko04934//Cushing syndrome+ko05165//Human papillomavirus infe…
CL2471.Contig1_All	ko00630//Glyoxylate and dicarboxylate metabolism;ko01200//Carbon metabolism;ko00270//Cysteine and methionine metabolism;ko00020//Citrate cycle (TCA cycle);ko00620//Pyruvate metabolism;ko01100//Metabolic pathways	Carbohydrate metabolism;Global and overview maps;Amino acid metabolism	Metabolism	Novel_gene	1889	60.9	47.91	51.16	15.84	7.29	11.11	-2.20896	0	0	AL662930.29 Mouse DNA sequence from clone RP23-212B18 on chromosome 11, complete sequence	malate mitochondrial [Lasius niger]	lactate/malate dehydrogenase, alpha/beta C-terminal domain	[C] KOG1494 NAD-dependent malate dehydrogenase	Malate dehydrogenase, mitochondrial OS=Bos taurus GN=MDH2 PE=1 SV=1	GO:0006099//tricarboxylic acid cycle;GO:0005975//carbohydrate metabolic process;GO:0030060//L-malate dehydrogenase activity;GO:0006108//malate metabolic process		K00026//malate dehydrogenase [EC:1.1.1.37]+ko01200//Carbon metabolism+ko00020//Citrate cycle (TCA cycle)+ko00620//Pyruvate metabolism+ko01100//Metabolic pathways+ko00270//Cysteine and methionine metabolism+ko00630//Glyoxylate and dicarboxylate metabolism;K00026//malate dehydrogenase [EC:1.1.1.37]+ko01200//Carbon metabolism+ko00020//Citrate cycle (TCA cycle)+ko00620//Pyruvate metabolism+ko01100//M…
CL2501.Contig1_All	ko03018//RNA degradation	Folding, sorting and degradation	Genetic Information Processing	Novel_gene	3888	1.25	2.29	3.63	1.13	1.03	1.17	-1.10313	2.68442e-39	1.08836e-39	XM_021842077.1 PREDICTED: Aedes aegypti dosage compensation regulator (LOC5565549), mRNA	ATP-dependent RNA helicase DHX36-like [Nilaparvata lugens]	Oligonucleotide/oligosaccharide-binding (OB)-fold	[A] KOG0920 ATP-dependent RNA helicase A	ATP-dependent RNA helicase DHX36 OS=Mus musculus GN=Dhx36 PE=1 SV=2			K14442//ATP-dependent RNA helicase DHX36 [EC:3.6.4.13]+ko03018//RNA degradation;K14442//ATP-dependent RNA helicase DHX36 [EC:3.6.4.13]+ko03018//RNA degradation;K14442//ATP-dependent RNA helicase DHX36 [EC:3.6.4.13]+ko03018//RNA degradation;K14442//ATP-dependent RNA helicase DHX36 [EC:3.6.4.13]+ko03018//RNA degradation;K14442//ATP-dependent RNA helicase DHX36 [EC:3.6.4.13]+ko03018//RNA degradation
CL251.Contig8_All	ko00052//Galactose metabolism;ko01100//Metabolic pathways;ko04973//Carbohydrate digestion and absorption	Digestive system;Carbohydrate metabolism;Global and overview maps	Metabolism;Organismal Systems	Novel_gene	1826	349.14	39.73	8.59	32.2	67.73	38.14	-1.53183	0	0		PREDICTED: myrosinase 1 [Bemisia tabaci]	Glycosyl hydrolase family 1	[G] KOG0626 Beta-glucosidase, lactase phlorizinhydrolase, and related proteins	Myrosinase 1 OS=Brevicoryne brassicae PE=1 SV=1			K01229//lactase-phlorizin hydrolase [EC:3.2.1.108 3.2.1.62]+ko00052//Galactose metabolism+ko04973//Carbohydrate digestion and absorption+ko01100//Metabolic pathways;K01229//lactase-phlorizin hydrolase [EC:3.2.1.108 3.2.1.62]+ko00052//Galactose metabolism+ko04973//Carbohydrate digestion and absorption+ko01100//Metabolic pathways;K01229//lactase-phlorizin hydrolase [EC:3.2.1.108 3.2.1.62]+ko00052//…
CL2515.Contig1_All	ko04621//NOD-like receptor signaling pathway;ko05418//Fluid shear stress and atherosclerosis	Immune system;Cardiovascular diseases	Organismal Systems;Human Diseases	Novel_gene	1461	91.94	66.88	48.78	2.46	1.8	1.86	-5.0731	0	0	EF070462.1 Maconellicoccus hirsutus clone WHMH2779 thioredoxin-like protein mRNA, complete cds	seminal fluid protein [Nilaparvata lugens]	Thioredoxin	[O] KOG0907 Thioredoxin	Thioredoxin-2 OS=Drosophila yakuba GN=Trx-2 PE=3 SV=1	GO:0006662//glycerol ether metabolic process;GO:0015035//protein disulfide oxidoreductase activity;GO:0005623//cell;GO:0045454//cell redox homeostasis		K03671//thioredoxin 1+ko05418//Fluid shear stress and atherosclerosis+ko04621//NOD-like receptor signaling pathway;K03671//thioredoxin 1+ko05418//Fluid shear stress and atherosclerosis+ko04621//NOD-like receptor signaling pathway;K03671//thioredoxin 1+ko05418//Fluid shear stress and atherosclerosis+ko04621//NOD-like receptor signaling pathway;K03671//thioredoxin 1+ko05418//Fluid shear stress and …
CL256.Contig2_All	ko00140//Steroid hormone biosynthesis;ko00053//Ascorbate and aldarate metabolism;ko00040//Pentose and glucuronate interconversions;ko00983//Drug metabolism - other enzymes;ko00980//Metabolism of xenobiotics by cytochrome P450;ko00860//Porphyrin and chlorophyll metabolism;ko00982//Drug metabolism - cytochrome P450;ko00830//Retinol metabolism;ko01100//Metabolic pathways;ko05204//Chemical carcinogen…	Carbohydrate metabolism;Xenobiotics biodegradation and metabolism;Cancers: Overview;Metabolism of cofactors and vitamins;Global and overview maps;Lipid metabolism	Metabolism;Human Diseases	Novel_gene	2066	35.41	29.59	34.34	12.45	13.49	12.18	-1.37885	0	0		PREDICTED: UDP-glucuronosyltransferase 2B15-like, partial [Acyrthosiphon pisum]	UDP-glucoronosyl and UDP-glucosyl transferase	[GC] KOG1192 UDP-glucuronosyl and UDP-glucosyl transferase	UDP-glucuronosyltransferase 2B2 OS=Rattus norvegicus GN=Ugt2b PE=1 SV=1			K00699//glucuronosyltransferase [EC:2.4.1.17]+ko00980//Metabolism of xenobiotics by cytochrome P450+ko00982//Drug metabolism - cytochrome P450+ko00983//Drug metabolism - other enzymes+ko00040//Pentose and glucuronate interconversions+ko00860//Porphyrin and chlorophyll metabolism+ko00053//Ascorbate and aldarate metabolism+ko00830//Retinol metabolism+ko05204//Chemical carcinogenesis+ko00140//Steroi…
CL2577.Contig3_All	ko00983//Drug metabolism - other enzymes;ko04725//Cholinergic synapse;ko00564//Glycerophospholipid metabolism;ko01100//Metabolic pathways	Lipid metabolism;Xenobiotics biodegradation and metabolism;Global and overview maps;Nervous system	Organismal Systems;Metabolism	Novel_gene	1667	4.11	2.45	2.96	1.15	1.16	1.03	-1.50312	3.02879e-35	1.33267e-35		PREDICTED: venom carboxylesterase-6-like [Anoplophora glabripennis]	Carboxylesterase family	[R] KOG1516 Carboxylesterase and related proteins	Pyrethroid hydrolase Ces2e OS=Mus musculus GN=Ces2e PE=1 SV=1	GO:0016787//hydrolase activity		K01049//acetylcholinesterase [EC:3.1.1.7]+ko04725//Cholinergic synapse+ko00564//Glycerophospholipid metabolism;K01049//acetylcholinesterase [EC:3.1.1.7]+ko04725//Cholinergic synapse+ko00564//Glycerophospholipid metabolism;K01049//acetylcholinesterase [EC:3.1.1.7]+ko04725//Cholinergic synapse+ko00564//Glycerophospholipid metabolism;K01044//carboxylesterase 1 [EC:3.1.1.1]+ko00983//Drug metabolism -…
CL2600.Contig2_All	ko00020//Citrate cycle (TCA cycle);ko01100//Metabolic pathways	Carbohydrate metabolism;Global and overview maps	Metabolism	Novel_gene	4229	212.44	105.55	146.17	21.21	19.73	13.88	-3.07587	0	0	XM_015578678.1 PREDICTED: Dufourea novaeangliae ATP-citrate synthase (LOC107189980), transcript variant X2, mRNA	PREDICTED: ATP-citrate synthase [Diuraphis noxia] >XP_015379618.1 PREDICTED: ATP-citrate synthase [Diuraphis noxia] >XP_015379627.1 PREDICTED: ATP-citrate synthase [Diuraphis noxia]	ATP citrate lyase citrate-binding	[C] KOG1254 ATP-citrate lyase	ATP-citrate synthase OS=Mus musculus GN=Acly PE=1 SV=1	GO:0006101//citrate metabolic process;GO:0006085//acetyl-CoA biosynthetic process;GO:0003878//ATP citrate synthase activity;GO:0046872//metal ion binding;GO:0005524//ATP binding;GO:0048037//cofactor binding;GO:0005737//cytoplasm;GO:0006629//lipid metabolic process		K01648//ATP citrate (pro-S)-lyase [EC:2.3.3.8]+ko00020//Citrate cycle (TCA cycle)+ko01100//Metabolic pathways;K01648//ATP citrate (pro-S)-lyase [EC:2.3.3.8]+ko00020//Citrate cycle (TCA cycle)+ko01100//Metabolic pathways;K01648//ATP citrate (pro-S)-lyase [EC:2.3.3.8]+ko00020//Citrate cycle (TCA cycle)+ko01100//Metabolic pathways;K01648//ATP citrate (pro-S)-lyase [EC:2.3.3.8]+ko00020//Citrate cycle…
CL2614.Contig2_All	ko05169//Epstein-Barr virus infection;ko03050//Proteasome	Folding, sorting and degradation;Infectious diseases: Viral	Human Diseases;Genetic Information Processing	Novel_gene	3522	9.87	7.89	13.99	4.4	2.12	3.49	-1.6523	1.96839e-281	1.30727e-282	XM_017055319.1 PREDICTED: Apis cerana 26S protease regulatory subunit 7 (LOC107996987), mRNA	PREDICTED: 26S protease regulatory subunit 7 [Cimex lectularius] >XP_014239192.1 PREDICTED: 26S protease regulatory subunit 7 [Cimex lectularius]	ATPase family associated with various cellular activities (AAA)	[O] KOG0729 26S proteasome regulatory complex, ATPase RPT1	26S proteasome regulatory subunit 7 OS=Xenopus laevis GN=psmc2 PE=2 SV=1	GO:0005524//ATP binding;GO:0036402//proteasome-activating ATPase activity;GO:0030163//protein catabolic process;GO:0005737//cytoplasm		K03061//26S proteasome regulatory subunit T1+ko03050//Proteasome+ko05169//Epstein-Barr virus infection;K03061//26S proteasome regulatory subunit T1+ko03050//Proteasome+ko05169//Epstein-Barr virus infection;K03061//26S proteasome regulatory subunit T1+ko03050//Proteasome+ko05169//Epstein-Barr virus infection;K03061//26S proteasome regulatory subunit T1+ko03050//Proteasome+ko05169//Epstein-Barr vir…
CL2649.Contig1_All	ko04919//Thyroid hormone signaling pathway;ko04974//Protein digestion and absorption	Endocrine system;Digestive system	Organismal Systems	Novel_gene	3055	3.19	2.68	3.35	1.54	1.45	1.11	-1.16214	8.26097e-43	3.1284e-43	JN955640.1 Mus musculus targeted non-conditional, lacZ-tagged mutant allele Scp2:tm1e(KOMP)Wtsi; transgenic	PREDICTED: monocarboxylate transporter 2 isoform X1 [Bemisia tabaci] >XP_018897739.1 PREDICTED: monocarboxylate transporter 2 isoform X1 [Bemisia tabaci] >XP_018897740.1 PREDICTED: monocarboxylate transporter 2 isoform X1 [Bemisia tabaci]	Major Facilitator Superfamily	[G] KOG2504 Monocarboxylate transporter	Monocarboxylate transporter 12 OS=Xenopus laevis GN=slc16a12 PE=2 SV=1			K08187//MFS transporter, MCP family, solute carrier family 16 (monocarboxylic acid transporters), member 10+ko04919//Thyroid hormone signaling pathway+ko04974//Protein digestion and absorption;K08187//MFS transporter, MCP family, solute carrier family 16 (monocarboxylic acid transporters), member 10+ko04919//Thyroid hormone signaling pathway+ko04974//Protein digestion and absorption;K08187//MFS t…
CL2649.Contig2_All	ko04974//Protein digestion and absorption;ko04919//Thyroid hormone signaling pathway	Digestive system;Endocrine system	Organismal Systems	Novel_gene	2398	4.43	4.3	4.57	2.77	1.75	1.98	-1.02289	3.22433e-39	1.31006e-39	GQ190264.1 Agkistrodon contortrix clone E33DIFJ02F1HI7 microsatellite sequence	PREDICTED: monocarboxylate transporter 2 isoform X1 [Bemisia tabaci] >XP_018897739.1 PREDICTED: monocarboxylate transporter 2 isoform X1 [Bemisia tabaci] >XP_018897740.1 PREDICTED: monocarboxylate transporter 2 isoform X1 [Bemisia tabaci]	Major Facilitator Superfamily	[G] KOG2504 Monocarboxylate transporter	Monocarboxylate transporter 12 OS=Xenopus laevis GN=slc16a12 PE=2 SV=1			K08187//MFS transporter, MCP family, solute carrier family 16 (monocarboxylic acid transporters), member 10+ko04919//Thyroid hormone signaling pathway+ko04974//Protein digestion and absorption;K08187//MFS transporter, MCP family, solute carrier family 16 (monocarboxylic acid transporters), member 10+ko04919//Thyroid hormone signaling pathway+ko04974//Protein digestion and absorption;K08187//MFS t…
CL2651.Contig1_All	ko03018//RNA degradation;ko03040//Spliceosome	Transcription;Folding, sorting and degradation	Genetic Information Processing	Novel_gene	621	9.14	8.88	7.84	3.85	2.66	1.98	-1.58488	8.28714e-35	3.68238e-35		U6 snRNA-associated Sm-like protein [Maconellicoccus hirsutus]	LSM domain	[A] KOG1784 Small Nuclear ribonucleoprotein splicing factor	U6 snRNA-associated Sm-like protein LSm8 OS=Bos taurus GN=LSM8 PE=3 SV=3	GO:0000398//mRNA splicing, via spliceosome;GO:0005688//U6 snRNP;GO:0046540//U4/U6 x U5 tri-snRNP complex		K12627//U6 snRNA-associated Sm-like protein LSm8+ko03040//Spliceosome+ko03018//RNA degradation;K12627//U6 snRNA-associated Sm-like protein LSm8+ko03040//Spliceosome+ko03018//RNA degradation;K12627//U6 snRNA-associated Sm-like protein LSm8+ko03040//Spliceosome+ko03018//RNA degradation;K12627//U6 snRNA-associated Sm-like protein LSm8+ko03040//Spliceosome+ko03018//RNA degradation;K12627//U6 snRNA-as…
CL2652.Contig4_All	ko04340//Hedgehog signaling pathway;ko04341//Hedgehog signaling pathway - fly	Signal transduction	Environmental Information Processing	Novel_gene	1627	15.52	24.11	23.2	8.9	7.01	9.41	-1.30523	3.25663e-176	3.39823e-177		PREDICTED: speckle-type POZ protein isoform X2 [Cyphomyrmex costatus]	BTB/POZ domain	[DR] KOG1987 Speckle-type POZ protein SPOP and related proteins with TRAF, MATH and BTB/POZ domains	Protein roadkill OS=Drosophila melanogaster GN=rdx PE=1 SV=2		Others	K10523//speckle-type POZ protein+ko04341//Hedgehog signaling pathway - fly+ko04340//Hedgehog signaling pathway;K10523//speckle-type POZ protein+ko04341//Hedgehog signaling pathway - fly+ko04340//Hedgehog signaling pathway;K10523//speckle-type POZ protein+ko04341//Hedgehog signaling pathway - fly+ko04340//Hedgehog signaling pathway;K10523//speckle-type POZ protein+ko04341//Hedgehog signaling pathw…
CL2661.Contig7_All	ko04974//Protein digestion and absorption	Digestive system	Organismal Systems	Novel_gene	1498	12.87	5.16	1.3	3.26	3.22	1.87	-1.20323	5.64586e-45	2.06197e-45		PREDICTED: collagen alpha chain CG42342 isoform X1 [Dinoponera quadriceps]	Collagen triple helix repeat (20 copies)	[W] KOG3544 Collagens (type IV and type XIII), and related proteins	Collagen alpha chain CG42342 OS=Drosophila melanogaster GN=CG42342 PE=2 SV=1			K16617//collagen, type XIII, alpha+ko04974//Protein digestion and absorption;K16617//collagen, type XIII, alpha+ko04974//Protein digestion and absorption;K16629//collagen, type XXI, alpha+ko04974//Protein digestion and absorption;K16629//collagen, type XXI, alpha+ko04974//Protein digestion and absorption;K16617//collagen, type XIII, alpha+ko04974//Protein digestion and absorption
CL2667.Contig4_All	ko00100//Steroid biosynthesis;ko04979//Cholesterol metabolism;ko04142//Lysosome	Lipid metabolism;Digestive system;Transport and catabolism	Metabolism;Organismal Systems;Cellular Processes	Novel_gene	1400	7.15	7.05	7.67	2.69	3.52	2.72	-1.28956	1.93036e-52	6.2296e-53		lipase 3-like [Nilaparvata lugens] >XP_022187147.1 lipase 3-like [Nilaparvata lugens] >XP_022187148.1 lipase 3-like [Nilaparvata lugens]	alpha/beta hydrolase fold	[I] KOG2624 Triglyceride lipase-cholesterol esterase	Lipase 3 OS=Drosophila melanogaster GN=Lip3 PE=2 SV=1			K01052//lysosomal acid lipase/cholesteryl ester hydrolase [EC:3.1.1.13]+ko04142//Lysosome+ko04979//Cholesterol metabolism+ko00100//Steroid biosynthesis;K01052//lysosomal acid lipase/cholesteryl ester hydrolase [EC:3.1.1.13]+ko04142//Lysosome+ko04979//Cholesterol metabolism+ko00100//Steroid biosynthesis;K01052//lysosomal acid lipase/cholesteryl ester hydrolase [EC:3.1.1.13]+ko04142//Lysosome+ko049…
CL2690.Contig2_All	ko00520//Amino sugar and nucleotide sugar metabolism	Carbohydrate metabolism	Metabolism	Novel_gene	1319	17.88	19.56	17.02	3.88	3.86	5.51	-2.03585	3.29411e-230	2.64245e-231		PREDICTED: N-acetylneuraminate lyase-like isoform X1 [Cimex lectularius] >XP_014254396.1 PREDICTED: N-acetylneuraminate lyase-like isoform X1 [Cimex lectularius] >XP_014254397.1 PREDICTED: N-acetylneuraminate lyase-like isoform X1 [Cimex lectularius]	Dihydrodipicolinate synthetase family	[EM] TWOG0253 Dihydrodipicolinate synthase/Acylneuraminate lyase	N-acetylneuraminate lyase OS=Pongo abelii GN=NPL PE=2 SV=1			K01639//N-acetylneuraminate lyase [EC:4.1.3.3]+ko00520//Amino sugar and nucleotide sugar metabolism;K01639//N-acetylneuraminate lyase [EC:4.1.3.3]+ko00520//Amino sugar and nucleotide sugar metabolism;K01639//N-acetylneuraminate lyase [EC:4.1.3.3]+ko00520//Amino sugar and nucleotide sugar metabolism;K01639//N-acetylneuraminate lyase [EC:4.1.3.3]+ko00520//Amino sugar and nucleotide sugar metabolism…
CL277.Contig3_All	ko00760//Nicotinate and nicotinamide metabolism;ko01100//Metabolic pathways	Metabolism of cofactors and vitamins;Global and overview maps	Metabolism	Novel_gene	1778	3.23	2.73	4.49	2.22	1.09	1.18	-1.20274	1.11719e-29	5.58717e-30		PREDICTED: NAD kinase isoform X3 [Diaphorina citri]	ATP-NAD kinase	[G] KOG2178 Predicted sugar kinase	NAD kinase OS=Mus musculus GN=Nadk PE=1 SV=2	GO:0003951//NAD+ kinase activity;GO:0006741//NADP biosynthetic process;GO:0019674//NAD metabolic process		K00858//NAD+ kinase [EC:2.7.1.23]+ko00760//Nicotinate and nicotinamide metabolism+ko01100//Metabolic pathways;K00858//NAD+ kinase [EC:2.7.1.23]+ko00760//Nicotinate and nicotinamide metabolism+ko01100//Metabolic pathways;K00858//NAD+ kinase [EC:2.7.1.23]+ko00760//Nicotinate and nicotinamide metabolism+ko01100//Metabolic pathways;K00858//NAD+ kinase [EC:2.7.1.23]+ko00760//Nicotinate and nicotinamid…
CL2770.Contig33_All	ko03040//Spliceosome	Transcription	Genetic Information Processing	Novel_gene	7898	3.72	3.1	4.31	1.81	1.09	1.87	-1.21726	1.51388e-142	1.98615e-143	XM_018464524.1 PREDICTED: Agrilus planipennis myelin expression factor 2 (LOC108733385), mRNA	PREDICTED: heterogeneous nuclear ribonucleoprotein M isoform X3 [Ceratina calcarata]	RNA recognition motif. (a.k.a. RRM, RBD, or RNP domain)	[A] KOG4212 RNA-binding protein hnRNP-M	Heterogeneous nuclear ribonucleoprotein M OS=Rattus norvegicus GN=Hnrnpm PE=1 SV=4		Others	K12887//heterogeneous nuclear ribonucleoprotein M+ko03040//Spliceosome;K12887//heterogeneous nuclear ribonucleoprotein M+ko03040//Spliceosome;K12887//heterogeneous nuclear ribonucleoprotein M+ko03040//Spliceosome;K12887//heterogeneous nuclear ribonucleoprotein M+ko03040//Spliceosome;K12887//heterogeneous nuclear ribonucleoprotein M+ko03040//Spliceosome
CL2770.Contig35_All	ko03040//Spliceosome	Transcription	Genetic Information Processing	Novel_gene	1518	26.45	21.85	18.19	7.51	1.38	5.98	-2.14096	0	0	XM_018464524.1 PREDICTED: Agrilus planipennis myelin expression factor 2 (LOC108733385), mRNA	PREDICTED: heterogeneous nuclear ribonucleoprotein M [Bemisia tabaci]	RNA recognition motif. (a.k.a. RRM, RBD, or RNP domain)	[A] KOG4212 RNA-binding protein hnRNP-M	Heterogeneous nuclear ribonucleoprotein M OS=Rattus norvegicus GN=Hnrnpm PE=1 SV=4		Others	K12887//heterogeneous nuclear ribonucleoprotein M+ko03040//Spliceosome;K12887//heterogeneous nuclear ribonucleoprotein M+ko03040//Spliceosome;K12887//heterogeneous nuclear ribonucleoprotein M+ko03040//Spliceosome;K12887//heterogeneous nuclear ribonucleoprotein M+ko03040//Spliceosome;K12887//heterogeneous nuclear ribonucleoprotein M+ko03040//Spliceosome
CL2793.Contig2_All	ko05146//Amoebiasis;ko05226//Gastric cancer	Infectious diseases: Parasitic;Cancers: Specific types	Human Diseases	Novel_gene	1795	1.66	8.08	3.99	2.68	1.11	2.13	-1.20151	7.21274e-39	2.95095e-39				[G] LSE0495 A 1, 3-beta-glucanase				K10955//mucin-2+ko05226//Gastric cancer+ko05146//Amoebiasis;K10955//mucin-2+ko05226//Gastric cancer+ko05146//Amoebiasis;K10955//mucin-2+ko05226//Gastric cancer+ko05146//Amoebiasis;K10955//mucin-2+ko05226//Gastric cancer+ko05146//Amoebiasis
CL285.Contig1_All	ko01100//Metabolic pathways	Global and overview maps	Metabolism	Novel_gene	640	40.22	74.23	30.46	9.65	5.54	3.13	-2.9585	0	0	XM_013248450.1 PREDICTED: Stomoxys calcitrans peroxiredoxin-6-like (LOC106084623), mRNA	Peroxiredoxin-6, putative [Pediculus humanus corporis] >EEB14645.1 Peroxiredoxin-6, putative [Pediculus humanus corporis]	AhpC/TSA family	[O] KOG0854 Alkyl hydroperoxide reductase, thiol specific antioxidant and related enzymes	Peroxiredoxin-6 OS=Gallus gallus GN=PRDX6 PE=2 SV=3	GO:0004601//peroxidase activity;GO:0005623//cell;GO:0045454//cell redox homeostasis		K00430//peroxidase [EC:1.11.1.7]+ko01100//Metabolic pathways;K00430//peroxidase [EC:1.11.1.7]+ko01100//Metabolic pathways;K00430//peroxidase [EC:1.11.1.7]+ko01100//Metabolic pathways;K00430//peroxidase [EC:1.11.1.7]+ko01100//Metabolic pathways
CL2859.Contig2_All	ko04024//cAMP signaling pathway;ko04080//Neuroactive ligand-receptor interaction	Signal transduction;Signaling molecules and interaction	Environmental Information Processing	Novel_gene	1376	7.16	5.42	8.44	3.37	3.08	2.68	-1.19522	3.7804e-44	1.39793e-44		PREDICTED: sex peptide receptor [Halyomorpha halys]	Serpentine type 7TM GPCR chemoreceptor Srw	[TV] LSE0316 H G-protein-coupled receptor	Lysophosphatidic acid receptor 4 OS=Homo sapiens GN=LPAR4 PE=1 SV=1			K08428//G protein-coupled receptor 139;K05052//neuromedin U receptor 1+ko04080//Neuroactive ligand-receptor interaction;K04284//growth hormone secretagogue receptor+ko04024//cAMP signaling pathway+ko04080//Neuroactive ligand-receptor interaction;K04233//allatostatin A receptor
CL286.Contig13_All	ko00511//Other glycan degradation;ko04146//Peroxisome;ko04142//Lysosome	Transport and catabolism;Glycan biosynthesis and metabolism	Metabolism;Cellular Processes	Novel_gene	1918	41.91	15.67	11.07	6.33	8.41	5.94	-1.73045	0	0		putative prophenoloxidase activating factor, partial [Maconellicoccus hirsutus]	Trypsin	[E] KOG3627 Trypsin	Trypsin alpha OS=Drosophila melanogaster GN=alphaTry PE=2 SV=1			K01362//ovochymase [EC:3.4.21.-];K01362//ovochymase [EC:3.4.21.-];K12311//lysosomal alpha-mannosidase [EC:3.2.1.24]+ko04142//Lysosome+ko00511//Other glycan degradation;K09640//transmembrane protease serine 9 [EC:3.4.21.-];K13335//peroxin-16+ko04146//Peroxisome
CL286.Contig8_All	ko04142//Lysosome;ko00511//Other glycan degradation;ko04610//Complement and coagulation cascades	Immune system;Transport and catabolism;Glycan biosynthesis and metabolism	Cellular Processes;Organismal Systems;Metabolism	Novel_gene	2237	6.93	4.87	3.68	1.01	1.78	1.05	-2.01825	6.37526e-114	1.03113e-114		putative prophenoloxidase activating factor, partial [Maconellicoccus hirsutus]	Trypsin	[E] KOG3627 Trypsin	Coagulation factor XI OS=Mus musculus GN=F11 PE=2 SV=2	GO:0004252//serine-type endopeptidase activity		K01362//ovochymase [EC:3.4.21.-];K01362//ovochymase [EC:3.4.21.-];K12311//lysosomal alpha-mannosidase [EC:3.2.1.24]+ko04142//Lysosome+ko00511//Other glycan degradation;K09640//transmembrane protease serine 9 [EC:3.4.21.-];K01314//coagulation factor X [EC:3.4.21.6]+ko04610//Complement and coagulation cascades
CL289.Contig7_All	ko01100//Metabolic pathways;ko00860//Porphyrin and chlorophyll metabolism	Metabolism of cofactors and vitamins;Global and overview maps	Metabolism	Novel_gene	3017	7.4	9.39	8.46	2.15	1.36	2.06	-2.17399	3.9699e-276	2.72284e-277		PREDICTED: oxygen-dependent coproporphyrinogen-III oxidase [Ceratina calcarata] >XP_017878300.1 PREDICTED: oxygen-dependent coproporphyrinogen-III oxidase [Ceratina calcarata]	Coproporphyrinogen III oxidase	[H] KOG1518 Coproporphyrinogen III oxidase CPO/HEM13	Oxygen-dependent coproporphyrinogen-III oxidase OS=Drosophila melanogaster GN=Coprox PE=2 SV=1	GO:0004109//coproporphyrinogen oxidase activity;GO:0006779//porphyrin-containing compound biosynthetic process	zf-C2H2	K00228//coproporphyrinogen III oxidase [EC:1.3.3.3]+ko00860//Porphyrin and chlorophyll metabolism+ko01100//Metabolic pathways;K00228//coproporphyrinogen III oxidase [EC:1.3.3.3]+ko00860//Porphyrin and chlorophyll metabolism+ko01100//Metabolic pathways;K00228//coproporphyrinogen III oxidase [EC:1.3.3.3]+ko00860//Porphyrin and chlorophyll metabolism+ko01100//Metabolic pathways;K00228//coproporphyri…
CL2895.Contig2_All	ko04213//Longevity regulating pathway - multiple species;ko04136//Autophagy - other;ko05206//MicroRNAs in cancer;ko04151//PI3K-Akt signaling pathway;ko04140//Autophagy - animal;ko04150//mTOR signaling pathway;ko04910//Insulin signaling pathway;ko04211//Longevity regulating pathway;ko04714//Thermogenesis;ko04152//AMPK signaling pathway	Endocrine system;Environmental adaptation;Transport and catabolism;Signal transduction;Cancers: Overview;Aging	Environmental Information Processing;Organismal Systems;Human Diseases;Cellular Processes	Novel_gene	4654	14.2	9	13.67	1.39	1.37	1.1	-3.25067	0	0		regulatory-associated protein of mTOR [Zootermopsis nevadensis] >XP_021925195.1 regulatory-associated protein of mTOR [Zootermopsis nevadensis]	Raptor N-terminal CASPase like domain	[D] KOG1517 Guanine nucleotide binding protein MIP1	Protein raptor homolog OS=Dictyostelium discoideum GN=raptor PE=1 SV=1	GO:0031929//TOR signaling;GO:0031931//TORC1 complex		K07204//regulatory associated protein of mTOR+ko04140//Autophagy - animal+ko04211//Longevity regulating pathway+ko04213//Longevity regulating pathway - multiple species+ko04910//Insulin signaling pathway+ko04136//Autophagy - other+ko04714//Thermogenesis+ko05206//MicroRNAs in cancer+ko04152//AMPK signaling pathway+ko04151//PI3K-Akt signaling pathway+ko04150//mTOR signaling pathway;K07204//regulato…
CL294.Contig6_All	ko05146//Amoebiasis	Infectious diseases: Parasitic	Human Diseases	Novel_gene	1492	94.81	34.65	12.56	17.12	23.18	24.14	-1.14221	1.08466e-293	6.77911e-295		serine protease inhibitor-like protein, partial [Maconellicoccus hirsutus]	Serpin (serine protease inhibitor)	[V] KOG2392 Serpin	Leukocyte elastase inhibitor OS=Sus scrofa GN=SERPINB1 PE=1 SV=1			K04525//serpin peptidase inhibitor, clade A;K13963//serpin B+ko05146//Amoebiasis;K13963//serpin B+ko05146//Amoebiasis;K13963//serpin B+ko05146//Amoebiasis;K13963//serpin B+ko05146//Amoebiasis
CL295.Contig2_All	ko05146//Amoebiasis	Infectious diseases: Parasitic	Human Diseases	Novel_gene	1625	13.83	16.99	18.27	6.49	4.71	6.61	-1.45467	2.98659e-162	3.39238e-163		serpin-1 precursor, putative [Ixodes scapularis] >EEC19553.1 serpin-1 precursor, putative [Ixodes scapularis]	Serpin (serine protease inhibitor)	[V] KOG2392 Serpin	Serpin A3-6 OS=Bos taurus GN=SERPINA3-6 PE=3 SV=1	GO:0005615//extracellular space;GO:0004867//serine-type endopeptidase inhibitor activity;GO:0016740//transferase activity		K04525//serpin peptidase inhibitor, clade A;K04525//serpin peptidase inhibitor, clade A;K13963//serpin B+ko05146//Amoebiasis;K13963//serpin B+ko05146//Amoebiasis;K13963//serpin B+ko05146//Amoebiasis
CL2961.Contig1_All	ko04612//Antigen processing and presentation;ko04142//Lysosome	Transport and catabolism;Immune system	Cellular Processes;Organismal Systems	Novel_gene	2076	67.1	49.89	36.1	27.77	21.85	19.37	-1.14226	0	0	AC100724.10 Mus musculus chromosome 17, clone RP24-120E11, complete sequence	gpi-anchor transamidase, partial [Riptortus pedestris]	Peptidase C13 family	[O] KOG1348 Asparaginyl peptidases	Hemoglobinase OS=Schistosoma japonicum GN=HAEM PE=2 SV=1			K01369//legumain [EC:3.4.22.34]+ko04142//Lysosome+ko04612//Antigen processing and presentation;K01369//legumain [EC:3.4.22.34]+ko04142//Lysosome+ko04612//Antigen processing and presentation;K01369//legumain [EC:3.4.22.34]+ko04142//Lysosome+ko04612//Antigen processing and presentation;K01369//legumain [EC:3.4.22.34]+ko04142//Lysosome+ko04612//Antigen processing and presentation
CL2961.Contig2_All	ko04612//Antigen processing and presentation;ko04142//Lysosome	Transport and catabolism;Immune system	Cellular Processes;Organismal Systems	Novel_gene	2161	27.36	13.31	16.69	7.32	8.19	6.38	-1.38665	2.99786e-237	2.31031e-238	AC100724.10 Mus musculus chromosome 17, clone RP24-120E11, complete sequence	gpi-anchor transamidase, partial [Riptortus pedestris]	Peptidase C13 family	[O] KOG1348 Asparaginyl peptidases	Hemoglobinase OS=Schistosoma japonicum GN=HAEM PE=2 SV=1			K01369//legumain [EC:3.4.22.34]+ko04142//Lysosome+ko04612//Antigen processing and presentation;K01369//legumain [EC:3.4.22.34]+ko04142//Lysosome+ko04612//Antigen processing and presentation;K01369//legumain [EC:3.4.22.34]+ko04142//Lysosome+ko04612//Antigen processing and presentation;K01369//legumain [EC:3.4.22.34]+ko04142//Lysosome+ko04612//Antigen processing and presentation
CL3029.Contig2_All	ko04657//IL-17 signaling pathway;ko05146//Amoebiasis;ko05226//Gastric cancer	Immune system;Cancers: Specific types;Infectious diseases: Parasitic	Organismal Systems;Human Diseases	Novel_gene	1812	29.99	31.3	22.06	5.28	3.83	3.89	-2.67251	0	0		PREDICTED: uncharacterized protein DDB_G0271670-like [Pseudopodoces humilis]	Predicted AAA-ATPase					K22016//mucin-3/17;K10955//mucin-2+ko05226//Gastric cancer+ko05146//Amoebiasis;K10955//mucin-2+ko05226//Gastric cancer+ko05146//Amoebiasis;K21125//mucin-5AC+ko04657//IL-17 signaling pathway
CL303.Contig5_All	ko05205//Proteoglycans in cancer;ko04624//Toll and Imd signaling pathway	Immune system;Cancers: Overview	Organismal Systems;Human Diseases	Novel_gene	5279	11.79	11.62	9.64	4.67	1.28	2.32	-1.97999	0	0	XM_015322598.1 PREDICTED: Polistes dominula ankyrin-3-like (LOC107067261), transcript variant X4, mRNA	LOW QUALITY PROTEIN: ankyrin-3-like [Zootermopsis nevadensis]	Ankyrin repeats (3 copies)	[M] KOG4177 Ankyrin	Ankyrin-2 OS=Mus musculus GN=Ank2 PE=1 SV=2		RHD	K10380//ankyrin+ko04624//Toll and Imd signaling pathway+ko05205//Proteoglycans in cancer;K10380//ankyrin+ko04624//Toll and Imd signaling pathway+ko05205//Proteoglycans in cancer;K10380//ankyrin+ko04624//Toll and Imd signaling pathway+ko05205//Proteoglycans in cancer;K10380//ankyrin+ko04624//Toll and Imd signaling pathway+ko05205//Proteoglycans in cancer;K10380//ankyrin+ko04624//Toll and Imd signa…
CL3034.Contig1_All	ko05146//Amoebiasis;ko05226//Gastric cancer	Cancers: Specific types;Infectious diseases: Parasitic	Human Diseases	Novel_gene	7210	6.26	4.11	4.96	1.11	1.82	1.77	-1.70999	5.11647e-296	3.16443e-297		Protein winged eye [Zootermopsis nevadensis]	BAH domain	[K] KOG1886 BAH domain proteins	BAH and coiled-coil domain-containing protein 1 OS=Homo sapiens GN=BAHCC1 PE=1 SV=3			K22016//mucin-3/17;K10955//mucin-2+ko05226//Gastric cancer+ko05146//Amoebiasis;K22016//mucin-3/17;K22016//mucin-3/17;K22017//mucin-4
CL3096.Contig1_All	ko04210//Apoptosis;ko04145//Phagosome;ko04140//Autophagy - animal;ko04612//Antigen processing and presentation;ko05323//Rheumatoid arthritis;ko05418//Fluid shear stress and atherosclerosis;ko04142//Lysosome;ko05205//Proteoglycans in cancer	Transport and catabolism;Cancers: Overview;Cell growth and death;Cardiovascular diseases;Immune diseases;Immune system	Organismal Systems;Human Diseases;Cellular Processes	Novel_gene	1433	7.1	11.85	10.22	3.01	2.23	4.72	-1.54754	3.54361e-93	6.85465e-94	AB306513.1 Plautia stali mRNA for cathepsin L-like cysteine protease 2, complete cds	putative cathepsin L-like protease [Maconellicoccus hirsutus]	Papain family cysteine protease	[O] KOG1543 Cysteine proteinase Cathepsin L	Cathepsin L OS=Drosophila melanogaster GN=Cp1 PE=2 SV=2	GO:0008234//cysteine-type peptidase activity		K01365//cathepsin L [EC:3.4.22.15]+ko04145//Phagosome+ko04140//Autophagy - animal+ko04142//Lysosome+ko04210//Apoptosis+ko05418//Fluid shear stress and atherosclerosis+ko04612//Antigen processing and presentation+ko05323//Rheumatoid arthritis+ko05205//Proteoglycans in cancer;K01365//cathepsin L [EC:3.4.22.15]+ko04145//Phagosome+ko04140//Autophagy - animal+ko04142//Lysosome+ko04210//Apoptosis+ko054…
CL3138.Contig1_All	ko05202//Transcriptional misregulation in cancer;ko04218//Cellular senescence;ko03022//Basal transcription factors;ko04137//Mitophagy - animal;ko04310//Wnt signaling pathway;ko04217//Necroptosis;ko05418//Fluid shear stress and atherosclerosis;ko04380//Osteoclast differentiation	Cell growth and death;Cancers: Overview;Transport and catabolism;Cardiovascular diseases;Signal transduction;Transcription;Development	Organismal Systems;Environmental Information Processing;Human Diseases;Genetic Information Processing;Cellular Processes	Novel_gene	519	599.96	818.35	638.13	265.13	254.88	322.11	-1.2743	0	0		hypothetical protein OCBIM_22001685mg, partial [Octopus bimaculoides]		[R] KOG4197 FOG: PPR repeat	Keratin, type I cytoskeletal 10 OS=Homo sapiens GN=KRT10 PE=1 SV=6		TF_bZIP	K14651//transcription initiation factor TFIID subunit 15+ko03022//Basal transcription factors+ko05202//Transcriptional misregulation in cancer;K14381//sequestosome 1+ko04217//Necroptosis+ko04218//Cellular senescence+ko05418//Fluid shear stress and atherosclerosis+ko04380//Osteoclast differentiation+ko04137//Mitophagy - animal;K04494//chromodomain helicase DNA binding protein 8 [EC:3.6.4.12]+ko043…
CL3151.Contig2_All	ko00140//Steroid hormone biosynthesis	Lipid metabolism	Metabolism	Novel_gene	1171	5.84	14.01	11.17	3.1	4.3	4.66	-1.36224	2.42033e-66	6.37441e-67		PREDICTED: estrogen sulfotransferase-like [Neodiprion lecontei]	Sulfotransferase domain	[R] KOG1584 Sulfotransferase	Sulfotransferase 1A1 OS=Mus musculus GN=Sult1a1 PE=1 SV=1			K01016//estrone sulfotransferase [EC:2.8.2.4]+ko00140//Steroid hormone biosynthesis;K01016//estrone sulfotransferase [EC:2.8.2.4]+ko00140//Steroid hormone biosynthesis;K01016//estrone sulfotransferase [EC:2.8.2.4]+ko00140//Steroid hormone biosynthesis;K01016//estrone sulfotransferase [EC:2.8.2.4]+ko00140//Steroid hormone biosynthesis
CL320.Contig10_All	ko01100//Metabolic pathways;ko00520//Amino sugar and nucleotide sugar metabolism;ko00051//Fructose and mannose metabolism	Carbohydrate metabolism;Global and overview maps	Metabolism	Novel_gene	3245	20.99	28.06	25.33	5.07	1.32	2.74	-3.0075	0	0		PREDICTED: phosphomannomutase-like isoform X1 [Hyalella azteca] >XP_018020737.1 PREDICTED: phosphomannomutase-like isoform X2 [Hyalella azteca]	SET domain	[I] KOG3189 Phosphomannomutase	Probable phosphomannomutase OS=Drosophila melanogaster GN=CG10688 PE=2 SV=1	GO:0006013//mannose metabolic process;GO:0045047//protein targeting to ER;GO:0004615//phosphomannomutase activity;GO:0005829//cytosol;GO:0006487//protein N-linked glycosylation;GO:0009298//GDP-mannose biosynthetic process	Others	K17497//phosphomannomutase [EC:5.4.2.8]+ko00051//Fructose and mannose metabolism+ko00520//Amino sugar and nucleotide sugar metabolism+ko01100//Metabolic pathways;K17497//phosphomannomutase [EC:5.4.2.8]+ko00051//Fructose and mannose metabolism+ko00520//Amino sugar and nucleotide sugar metabolism+ko01100//Metabolic pathways;K17497//phosphomannomutase [EC:5.4.2.8]+ko00051//Fructose and mannose metab…
CL320.Contig12_All	ko00310//Lysine degradation	Amino acid metabolism	Metabolism	Novel_gene	3050	32.26	41.3	35.93	20.55	12.9	18.44	-1.06956	0	0		PREDICTED: histone-lysine N-methyltransferase SUV39H2 isoform X1 [Pogonomyrmex barbatus]	SET domain	[I] KOG3189 Phosphomannomutase	Probable phosphomannomutase OS=Drosophila melanogaster GN=CG10688 PE=2 SV=1		MBD	K11419//histone-lysine N-methyltransferase SUV39H [EC:2.1.1.43]+ko00310//Lysine degradation;K11419//histone-lysine N-methyltransferase SUV39H [EC:2.1.1.43]+ko00310//Lysine degradation;K11419//histone-lysine N-methyltransferase SUV39H [EC:2.1.1.43]+ko00310//Lysine degradation;K11419//histone-lysine N-methyltransferase SUV39H [EC:2.1.1.43]+ko00310//Lysine degradation;K11419//histone-lysine N-methyl…
CL324.Contig9_All	ko00983//Drug metabolism - other enzymes;ko04725//Cholinergic synapse;ko04975//Fat digestion and absorption;ko00561//Glycerolipid metabolism;ko04972//Pancreatic secretion;ko01100//Metabolic pathways;ko00100//Steroid biosynthesis;ko00564//Glycerophospholipid metabolism	Nervous system;Digestive system;Xenobiotics biodegradation and metabolism;Lipid metabolism;Global and overview maps	Organismal Systems;Metabolism	Novel_gene	1024	4.33	3.36	4.23	2.05	2.14	1.42	-1.07953	1.5477e-16	1.14765e-16		esterase FE4-like isoform X1 [Myzus persicae]	Carboxylesterase family	[R] KOG1516 Carboxylesterase and related proteins	Esterase E4 OS=Myzus persicae PE=1 SV=1			K12298//bile salt-stimulated lipase [EC:3.1.1.3 3.1.1.13]+ko04975//Fat digestion and absorption+ko04972//Pancreatic secretion+ko00100//Steroid biosynthesis+ko00561//Glycerolipid metabolism+ko01100//Metabolic pathways;K03927//carboxylesterase 2 [EC:3.1.1.1 3.1.1.84 3.1.1.56]+ko00983//Drug metabolism - other enzymes;K01049//acetylcholinesterase [EC:3.1.1.7]+ko04725//Cholinergic synapse+ko00564//Gly…
CL3291.Contig1_All	ko04923//Regulation of lipolysis in adipocytes;ko01100//Metabolic pathways;ko04714//Thermogenesis;ko00561//Glycerolipid metabolism	Global and overview maps;Endocrine system;Lipid metabolism;Environmental adaptation	Organismal Systems;Metabolism	Novel_gene	2424	11.92	9.83	11.39	4.06	1.51	6.2	-1.48715	4.61036e-172	4.95113e-173		PREDICTED: mitochondrial sodium/hydrogen exchanger 9B2-like [Halyomorpha halys]	Sodium/hydrogen exchanger family	[P] KOG3826 Na+/H+ antiporter	Sodium/hydrogen exchanger 9B1 OS=Homo sapiens GN=SLC9B1 PE=2 SV=2			K16816//patatin-like phospholipase domain-containing protein 2 [EC:3.1.1.3]+ko04714//Thermogenesis+ko00561//Glycerolipid metabolism+ko01100//Metabolic pathways+ko04923//Regulation of lipolysis in adipocytes
CL3291.Contig4_All	ko01100//Metabolic pathways;ko04714//Thermogenesis;ko00561//Glycerolipid metabolism;ko04923//Regulation of lipolysis in adipocytes	Lipid metabolism;Environmental adaptation;Global and overview maps;Endocrine system	Organismal Systems;Metabolism	Novel_gene	1509	15.09	10.27	12.22	4.81	2.15	4.76	-1.66762	2.36787e-140	3.1503e-141		Mitochondrial sodium/hydrogen exchanger NHA2 [Zootermopsis nevadensis]	Sodium/hydrogen exchanger family	[P] KOG3826 Na+/H+ antiporter	Sodium/hydrogen exchanger 9B2 OS=Mus musculus GN=Slc9b2 PE=1 SV=2			K16816//patatin-like phospholipase domain-containing protein 2 [EC:3.1.1.3]+ko04714//Thermogenesis+ko00561//Glycerolipid metabolism+ko01100//Metabolic pathways+ko04923//Regulation of lipolysis in adipocytes
CL3355.Contig2_All	ko04710//Circadian rhythm;ko04728//Dopaminergic synapse;ko05168//Herpes simplex infection;ko04711//Circadian rhythm - fly	Infectious diseases: Viral;Nervous system;Environmental adaptation	Organismal Systems;Human Diseases	Novel_gene	4735	4.25	2.83	4.33	1.59	2.25	1.27	-1.15699	8.64948e-81	1.93391e-81	XM_004642744.1 PREDICTED: Octodon degus striatin interacting protein 2 (Strip2), transcript variant X2, mRNA	methoprene tolerant [Planococcus kraunhiae]	PAS domain	[K] KOG3561 Aryl-hydrocarbon receptor nuclear translocator	Putative protein TPRXL OS=Homo sapiens GN=TPRXL PE=5 SV=2	GO:0005634//nucleus;GO:0005667//transcription factor complex;GO:0006351//transcription, DNA-templated;GO:0003700//DNA binding transcription factor activity;GO:0005737//cytoplasm;GO:0046983//protein dimerization activity	bHLH	K02296//aryl hydrocarbon receptor nuclear translocator-like protein 1+ko04728//Dopaminergic synapse+ko04711//Circadian rhythm - fly+ko04710//Circadian rhythm+ko05168//Herpes simplex infection;K09099//aryl hydrocarbon receptor nuclear translocator-like protein 2;K02296//aryl hydrocarbon receptor nuclear translocator-like protein 1+ko04728//Dopaminergic synapse+ko04711//Circadian rhythm - fly+ko047…
CL3451.Contig2_All	ko04972//Pancreatic secretion;ko04020//Calcium signaling pathway;ko04022//cGMP-PKG signaling pathway;ko05010//Alzheimer disease	Neurodegenerative diseases;Signal transduction;Digestive system	Organismal Systems;Human Diseases;Environmental Information Processing	Novel_gene	781	17.52	53.54	30.9	25.55	5.01	12.62	-1.20869	1.33894e-114	2.15105e-115		proteophosphoglycan 5 [Leishmania major strain Friedlin] >CBZ12682.1 proteophosphoglycan 5 [Leishmania major strain Friedlin]	RAM signalling pathway protein	[T] KOG1187 Serine/threonine protein kinase	Polycystic kidney disease protein 1-like 3 OS=Mus musculus GN=Pkd1l3 PE=1 SV=2		Homeobox	K08451//adhesion G-protein coupled receptor G2;K05853//Ca2+ transporting ATPase, sarcoplasmic/endoplasmic reticulum [EC:3.6.3.8]+ko04022//cGMP-PKG signaling pathway+ko04020//Calcium signaling pathway+ko04972//Pancreatic secretion+ko05010//Alzheimer disease;K16145//mucin-16
CL3453.Contig2_All	ko04340//Hedgehog signaling pathway;ko05161//Hepatitis B;ko05205//Proteoglycans in cancer;ko04918//Thyroid hormone synthesis;ko04979//Cholesterol metabolism;ko04512//ECM-receptor interaction	Endocrine system;Digestive system;Infectious diseases: Viral;Signal transduction;Cancers: Overview;Signaling molecules and interaction	Organismal Systems;Human Diseases;Environmental Information Processing	Novel_gene	689	15.47	14.54	13.03	6.54	3.82	8.4	-1.18432	1.29408e-41	5.00331e-42		low-density lipoprotein receptor-like protein [Euroglyphus maynei]	Low-density lipoprotein receptor domain class A	[T] KOG1215 Low-density lipoprotein receptors containing Ca2+-binding EGF-like domains	Very low-density lipoprotein receptor OS=Homo sapiens GN=VLDLR PE=1 SV=1			K06233//low density lipoprotein-related protein 2+ko04918//Thyroid hormone synthesis+ko04340//Hedgehog signaling pathway+ko04979//Cholesterol metabolism;K06255//basement membrane-specific heparan sulfate proteoglycan core protein+ko04512//ECM-receptor interaction+ko05205//Proteoglycans in cancer+ko05161//Hepatitis B;K20053//very low-density lipoprotein receptor;K20053//very low-density lipoprotei…
CL3470.Contig2_All	ko00981//Insect hormone biosynthesis;ko00140//Steroid hormone biosynthesis;ko00900//Terpenoid backbone biosynthesis	Lipid metabolism;Metabolism of terpenoids and polyketides	Metabolism	Novel_gene	1705	4.76	6.1	9.2	2.69	3.64	2.72	-1.14612	2.64406e-49	8.97257e-50		PREDICTED: farnesol dehydrogenase [Acyrthosiphon pisum] >XP_008184690.1 PREDICTED: farnesol dehydrogenase [Acyrthosiphon pisum] >XP_016661278.1 PREDICTED: farnesol dehydrogenase [Acyrthosiphon pisum]	short chain dehydrogenase	[Q] KOG1205 Predicted dehydrogenase	Farnesol dehydrogenase OS=Aedes aegypti GN=SDR-1 PE=1 SV=2	GO:0016491//oxidoreductase activity		K22970//17beta-estradiol 17-dehydrogenase / 3beta-hydroxysteroid 3-dehydrogenase [EC:1.1.1.62 1.1.1.270]+ko00140//Steroid hormone biosynthesis;K15890//NADP+-dependent farnesol dehydrogenase [EC:1.1.1.216]+ko00981//Insect hormone biosynthesis+ko00900//Terpenoid backbone biosynthesis;K15890//NADP+-dependent farnesol dehydrogenase [EC:1.1.1.216]+ko00981//Insect hormone biosynthesis+ko00900//Terpenoi…
CL3554.Contig1_All	ko05146//Amoebiasis;ko05226//Gastric cancer;ko04657//IL-17 signaling pathway	Infectious diseases: Parasitic;Cancers: Specific types;Immune system	Human Diseases;Organismal Systems	Novel_gene	4702	39.91	33.97	35.08	20.09	13.18	14.91	-1.16929	0	0	XM_013478510.1 Eimeria maxima hypothetical protein, conserved partial mRNA	proteophosphoglycan 5 [Leishmania major strain Friedlin] >CBZ12682.1 proteophosphoglycan 5 [Leishmania major strain Friedlin]	UBA/TS-N domain	[K] KOG1878 Nuclear receptor coregulator SMRT/SMRTER, contains Myb-like domains	Probable serine/threonine-protein kinase fhkB OS=Dictyostelium discoideum GN=fhkB PE=3 SV=1		MYB	K22016//mucin-3/17;K10955//mucin-2+ko05226//Gastric cancer+ko05146//Amoebiasis;K21125//mucin-5AC+ko04657//IL-17 signaling pathway;K22017//mucin-4;K21125//mucin-5AC+ko04657//IL-17 signaling pathway
CL3555.Contig3_All	ko00562//Inositol phosphate metabolism;ko04070//Phosphatidylinositol signaling system;ko01100//Metabolic pathways	Carbohydrate metabolism;Global and overview maps;Signal transduction	Metabolism;Environmental Information Processing	Novel_gene	1396	3.5	4.75	4.15	1.61	1.56	2.37	-1.16153	5.07116e-26	2.77646e-26		myotubularin-related protein 8 isoform X4 [Zootermopsis nevadensis]	Myotubularin-like phosphatase domain	[R] KOG1089 Myotubularin-related phosphatidylinositol 3-phosphate 3-phosphatase MTM6	Myotubularin-related protein 8 OS=Gallus gallus GN=MTMR8 PE=2 SV=1			K18083//myotubularin-related protein 6/7/8 [EC:3.1.3.64 3.1.3.95]+ko04070//Phosphatidylinositol signaling system+ko00562//Inositol phosphate metabolism+ko01100//Metabolic pathways;K18083//myotubularin-related protein 6/7/8 [EC:3.1.3.64 3.1.3.95]+ko04070//Phosphatidylinositol signaling system+ko00562//Inositol phosphate metabolism+ko01100//Metabolic pathways
CL3558.Contig2_All	ko04144//Endocytosis;ko04530//Tight junction;ko04145//Phagosome	Transport and catabolism;Cellular community - eukaryotes	Cellular Processes	Novel_gene	3054	22.6	18.8	24.42	11.25	8.11	8.7	-1.22143	0	0		WD repeat and FYVE domain-containing protein 2 [Zootermopsis nevadensis] >KDR10967.1 WD repeat and FYVE domain-containing protein 2 [Zootermopsis nevadensis]	WD domain, G-beta repeat	[S] KOG1409 Uncharacterized conserved protein, contains WD40 repeats and FYVE domains	WD repeat and FYVE domain-containing protein 1 OS=Bos taurus GN=WDFY1 PE=2 SV=1			K21108//blood vessel epicardial substance+ko04530//Tight junction;K12182//hepatocyte growth factor-regulated tyrosine kinase substrate+ko04144//Endocytosis+ko04145//Phagosome;K18643//katanin p80 WD40 repeat-containing subunit B1
CL3672.Contig3_All	ko04144//Endocytosis	Transport and catabolism	Cellular Processes	Novel_gene	2127	4.2	4.8	9.38	2.53	1.78	3.89	-1.1607	8.49717e-58	2.50113e-58		PREDICTED: protein spartin isoform X1 [Aethina tumida]	Senescence-associated protein	[S] KOG2709 Uncharacterized conserved protein	Spartin OS=Homo sapiens GN=SPART PE=1 SV=1			K19366//spartin+ko04144//Endocytosis;K19366//spartin+ko04144//Endocytosis;K19366//spartin+ko04144//Endocytosis;K19366//spartin+ko04144//Endocytosis;K19366//spartin+ko04144//Endocytosis
CL3682.Contig2_All	ko00514//Other types of O-glycan biosynthesis;ko04931//Insulin resistance	Glycan biosynthesis and metabolism;Endocrine and metabolic diseases	Metabolism;Human Diseases	Novel_gene	4374	8.96	8.68	9	3.72	4.82	2.75	-1.23831	9.24234e-192	8.88069e-193	XM_012423941.1 PREDICTED: Orussus abietinus UDP-N-acetylglucosamine--peptide N-acetylglucosaminyltransferase 110 kDa subunit (LOC105699157), transcript variant X2, mRNA	PREDICTED: UDP-N-acetylglucosamine--peptide N-acetylglucosaminyltransferase 110 kDa subunit isoform X1 [Bemisia tabaci]	Glycosyl transferase family 41	[GOT] KOG4626 O-linked N-acetylglucosamine transferase OGT	UDP-N-acetylglucosamine--peptide N-acetylglucosaminyltransferase 110 kDa subunit OS=Mus musculus GN=Ogt PE=1 SV=2			K09667//protein O-GlcNAc transferase [EC:2.4.1.255]+ko00514//Other types of O-glycan biosynthesis+ko04931//Insulin resistance;K09667//protein O-GlcNAc transferase [EC:2.4.1.255]+ko00514//Other types of O-glycan biosynthesis+ko04931//Insulin resistance;K09667//protein O-GlcNAc transferase [EC:2.4.1.255]+ko00514//Other types of O-glycan biosynthesis+ko04931//Insulin resistance;K09667//protein O-Glc…
CL3685.Contig1_All	ko04330//Notch signaling pathway;ko05010//Alzheimer disease	Signal transduction;Neurodegenerative diseases	Human Diseases;Environmental Information Processing	Novel_gene	560	93.95	83.69	73.76	51.55	23.81	41.14	-1.08484	9.86652e-161	1.13465e-161		membrane protein, putative [Ixodes scapularis] >EEC03151.1 membrane protein, putative [Ixodes scapularis]	Presenilin enhancer-2 subunit of gamma secretase	[S] KOG3402 Predicted membrane protein	Gamma-secretase subunit pen-2 OS=Drosophila melanogaster GN=pen-2 PE=1 SV=3	GO:0070765//gamma-secretase complex;GO:0007220//Notch receptor processing;GO:0016021//integral component of membrane		K06170//presenilin enhancer 2+ko05010//Alzheimer disease+ko04330//Notch signaling pathway;K06170//presenilin enhancer 2+ko05010//Alzheimer disease+ko04330//Notch signaling pathway;K06170//presenilin enhancer 2+ko05010//Alzheimer disease+ko04330//Notch signaling pathway
CL3698.Contig1_All	ko05204//Chemical carcinogenesis;ko00980//Metabolism of xenobiotics by cytochrome P450;ko00983//Drug metabolism - other enzymes;ko00053//Ascorbate and aldarate metabolism;ko00040//Pentose and glucuronate interconversions;ko00982//Drug metabolism - cytochrome P450;ko00860//Porphyrin and chlorophyll metabolism;ko01100//Metabolic pathways;ko00140//Steroid hormone biosynthesis;ko00830//Retinol metabo…	Cancers: Overview;Lipid metabolism;Metabolism of cofactors and vitamins;Xenobiotics biodegradation and metabolism;Carbohydrate metabolism;Global and overview maps	Human Diseases;Metabolism	Novel_gene	1892	12.03	7.41	12.32	3.43	4.91	5.12	-1.24072	3.90368e-97	7.2982e-98		UDP-glucuronosyltransferase 2B10-like [Myzus persicae]	UDP-glucoronosyl and UDP-glucosyl transferase	[GC] KOG1192 UDP-glucuronosyl and UDP-glucosyl transferase	UDP-glucuronosyltransferase 2B11 OS=Homo sapiens GN=UGT2B11 PE=2 SV=1	GO:0008152//metabolic process;GO:0015020//glucuronosyltransferase activity;GO:0016021//integral component of membrane		K00699//glucuronosyltransferase [EC:2.4.1.17]+ko00980//Metabolism of xenobiotics by cytochrome P450+ko00982//Drug metabolism - cytochrome P450+ko00983//Drug metabolism - other enzymes+ko00040//Pentose and glucuronate interconversions+ko00860//Porphyrin and chlorophyll metabolism+ko00053//Ascorbate and aldarate metabolism+ko00830//Retinol metabolism+ko05204//Chemical carcinogenesis+ko00140//Steroi…
CL371.Contig1_All	ko04120//Ubiquitin mediated proteolysis	Folding, sorting and degradation	Genetic Information Processing	Novel_gene	1626	19.07	15.97	16.73	8.18	6.13	8.77	-1.15858	9.06647e-121	1.3787e-121		ubiquitin-conjugating enzyme E2 W isoform X6 [Zootermopsis nevadensis] >XP_021923552.1 ubiquitin-conjugating enzyme E2 W isoform X6 [Zootermopsis nevadensis]	Ubiquitin-conjugating enzyme	[O] KOG0427 Ubiquitin conjugating enzyme	Probable ubiquitin-conjugating enzyme E2 W-B OS=Danio rerio GN=ube2wb PE=2 SV=1			K10688//ubiquitin-conjugating enzyme E2 W [EC:2.3.2.25]+ko04120//Ubiquitin mediated proteolysis;K10688//ubiquitin-conjugating enzyme E2 W [EC:2.3.2.25]+ko04120//Ubiquitin mediated proteolysis;K10688//ubiquitin-conjugating enzyme E2 W [EC:2.3.2.25]+ko04120//Ubiquitin mediated proteolysis;K10688//ubiquitin-conjugating enzyme E2 W [EC:2.3.2.25]+ko04120//Ubiquitin mediated proteolysis;K10688//ubiquit…
CL372.Contig12_All	ko03320//PPAR signaling pathway	Endocrine system	Organismal Systems	Novel_gene	1437	203.46	189.04	187.29	78.95	12.12	43.9	-2.0763	0	0	XM_020010476.1 PREDICTED: Aethina tumida polyubiquitin-C-like (LOC109595173), mRNA	PREDICTED: polyubiquitin isoform X1 [Musca domestica]	Ubiquitin family	[OR] KOG0001 Ubiquitin and ubiquitin-like proteins	Polyubiquitin-C OS=Rattus norvegicus GN=Ubc PE=1 SV=1			K08770//ubiquitin C+ko03320//PPAR signaling pathway;K08770//ubiquitin C+ko03320//PPAR signaling pathway;K08770//ubiquitin C+ko03320//PPAR signaling pathway;K08770//ubiquitin C+ko03320//PPAR signaling pathway
CL372.Contig1_All	ko03320//PPAR signaling pathway	Endocrine system	Organismal Systems	Novel_gene	2613	19.91	28.28	21.93	13.31	5.23	13.9	-1.1027	9.02483e-247	6.71958e-248	XM_019050931.1 PREDICTED: Bemisia tabaci polyubiquitin-A (LOC109036602), mRNA	polyubiquitin-C-like [Helicoverpa armigera]	Ubiquitin family	[OR] KOG0001 Ubiquitin and ubiquitin-like proteins	Polyubiquitin-A OS=Caenorhabditis elegans GN=ubq-1 PE=3 SV=1			K08770//ubiquitin C+ko03320//PPAR signaling pathway;K08770//ubiquitin C+ko03320//PPAR signaling pathway;K08770//ubiquitin C+ko03320//PPAR signaling pathway;K08770//ubiquitin C+ko03320//PPAR signaling pathway;K08770//ubiquitin C+ko03320//PPAR signaling pathway
CL3748.Contig2_All	ko01100//Metabolic pathways;ko00350//Tyrosine metabolism	Global and overview maps;Amino acid metabolism	Metabolism	Novel_gene	1934	255.69	163	170.31	37.29	15.39	11.02	-3.18602	0	0		hypothetical protein, partial [Maconellicoccus hirsutus]	Major royal jelly protein		Protein yellow OS=Drosophila melanogaster GN=y PE=2 SV=1			K22203//dopachrome tautomerase [EC:5.3.3.12]+ko00350//Tyrosine metabolism+ko01100//Metabolic pathways;K22203//dopachrome tautomerase [EC:5.3.3.12]+ko00350//Tyrosine metabolism+ko01100//Metabolic pathways;K22203//dopachrome tautomerase [EC:5.3.3.12]+ko00350//Tyrosine metabolism+ko01100//Metabolic pathways;K22203//dopachrome tautomerase [EC:5.3.3.12]+ko00350//Tyrosine metabolism+ko01100//Metabolic …
CL3764.Contig1_All	ko05164//Influenza A;ko04151//PI3K-Akt signaling pathway;ko05161//Hepatitis B;ko05165//Human papillomavirus infection;ko04620//Toll-like receptor signaling pathway;ko05168//Herpes simplex infection;ko05160//Hepatitis C;ko04217//Necroptosis;ko04080//Neuroactive ligand-receptor interaction;ko05167//Kaposi sarcoma-associated herpesvirus infection	Cell growth and death;Immune system;Signal transduction;Signaling molecules and interaction;Infectious diseases: Viral	Human Diseases;Organismal Systems;Cellular Processes;Environmental Information Processing	Novel_gene	1539	2.91	3.73	5.28	1.96	2.21	1.38	-1.09686	2.63685e-25	1.47349e-25		PREDICTED: leucine-rich repeat protein soc-2 isoform X2 [Bemisia tabaci]	Leucine rich repeat	[R] KOG4579 Leucine-rich repeat (LRR) protein associated with apoptosis in muscle tissue	Leucine-rich repeat-containing protein 40 OS=Macaca fascicularis GN=LRRC40 PE=2 SV=1			K04240//neuropeptide FF receptor 1+ko04080//Neuroactive ligand-receptor interaction;K05401//toll-like receptor 3+ko04217//Necroptosis+ko04620//Toll-like receptor signaling pathway+ko05161//Hepatitis B+ko05160//Hepatitis C+ko05165//Human papillomavirus infection+ko05164//Influenza A+ko05167//Kaposi sarcoma-associated herpesvirus infection+ko05168//Herpes simplex infection;K22038//volume-regulated …
CL38.Contig3_All	ko04510//Focal adhesion;ko05222//Small cell lung cancer;ko05145//Toxoplasmosis;ko05200//Pathways in cancer;ko04512//ECM-receptor interaction;ko05165//Human papillomavirus infection;ko05146//Amoebiasis;ko04151//PI3K-Akt signaling pathway	Cancers: Overview;Infectious diseases: Parasitic;Infectious diseases: Viral;Cancers: Specific types;Cellular community - eukaryotes;Signaling molecules and interaction;Signal transduction	Human Diseases;Environmental Information Processing;Cellular Processes	Novel_gene	1689	223.85	123.48	238.55	68.64	88.95	74.42	-1.334	0	0		laminin subunit beta-1 isoform X3 [Zootermopsis nevadensis] >KDR15871.1 Laminin subunit beta-1 [Zootermopsis nevadensis]	Laminin N-terminal (Domain VI)	[W] KOG0994 Extracellular matrix glycoprotein Laminin subunit beta	Laminin subunit beta-1 OS=Mus musculus GN=Lamb1 PE=1 SV=3			K05636//laminin, beta 1+ko05222//Small cell lung cancer+ko04512//ECM-receptor interaction+ko04510//Focal adhesion+ko05146//Amoebiasis+ko05145//Toxoplasmosis+ko05200//Pathways in cancer+ko04151//PI3K-Akt signaling pathway+ko05165//Human papillomavirus infection;K05636//laminin, beta 1+ko05222//Small cell lung cancer+ko04512//ECM-receptor interaction+ko04510//Focal adhesion+ko05146//Amoebiasis+ko05…
CL38.Contig5_All	ko05200//Pathways in cancer;ko05165//Human papillomavirus infection;ko04510//Focal adhesion;ko05222//Small cell lung cancer;ko05146//Amoebiasis;ko05145//Toxoplasmosis;ko04512//ECM-receptor interaction;ko04151//PI3K-Akt signaling pathway	Cellular community - eukaryotes;Cancers: Specific types;Infectious diseases: Parasitic;Infectious diseases: Viral;Signaling molecules and interaction;Cancers: Overview;Signal transduction	Cellular Processes;Environmental Information Processing;Human Diseases	Novel_gene	9023	15.16	13.03	15.4	5.11	8.31	6.14	-1.16065	0	0		laminin subunit beta-1 isoform X2 [Zootermopsis nevadensis]	Laminin EGF domain	[W] KOG0994 Extracellular matrix glycoprotein Laminin subunit beta	Laminin subunit beta-1 OS=Drosophila melanogaster GN=LanB1 PE=1 SV=4		RHD	K05636//laminin, beta 1+ko05222//Small cell lung cancer+ko04512//ECM-receptor interaction+ko04510//Focal adhesion+ko05146//Amoebiasis+ko05145//Toxoplasmosis+ko05200//Pathways in cancer+ko04151//PI3K-Akt signaling pathway+ko05165//Human papillomavirus infection;K05636//laminin, beta 1+ko05222//Small cell lung cancer+ko04512//ECM-receptor interaction+ko04510//Focal adhesion+ko05146//Amoebiasis+ko05…
CL3807.Contig1_All	ko03008//Ribosome biogenesis in eukaryotes	Translation	Genetic Information Processing	Novel_gene	1127	16.77	16.19	17.97	6.16	7.36	9.56	-1.13983	1.17791e-78	2.68744e-79		PREDICTED: U3 small nucleolar ribonucleoprotein protein IMP3 [Nasonia vitripennis]	S4 domain	[A] KOG4655 U3 small nucleolar ribonucleoprotein (snoRNP) component	U3 small nucleolar ribonucleoprotein protein IMP3 OS=Mus musculus GN=Imp3 PE=2 SV=1	GO:0030515//snoRNA binding;GO:0032040//small-subunit processome;GO:0034457//Mpp10 complex;GO:0005622//intracellular;GO:0006364//rRNA processing;GO:0019843//rRNA binding		K14560//U3 small nucleolar ribonucleoprotein protein IMP3+ko03008//Ribosome biogenesis in eukaryotes;K14560//U3 small nucleolar ribonucleoprotein protein IMP3+ko03008//Ribosome biogenesis in eukaryotes;K14560//U3 small nucleolar ribonucleoprotein protein IMP3+ko03008//Ribosome biogenesis in eukaryotes;K14560//U3 small nucleolar ribonucleoprotein protein IMP3+ko03008//Ribosome biogenesis in eukary…
CL3813.Contig5_All	ko03410//Base excision repair;ko04320//Dorso-ventral axis formation;ko04013//MAPK signaling pathway - fly	Replication and repair;Signal transduction;Development	Genetic Information Processing;Organismal Systems;Environmental Information Processing	Novel_gene	1690	33.24	17.61	13.23	10.67	9.19	10.17	-1.08792	1.59569e-140	2.11603e-141	XM_015881750.1 PREDICTED: Coturnix japonica PRELI domain containing 3B (PRELID3B), mRNA	uncharacterized protein LOC110838670 [Zootermopsis nevadensis] >KDR09491.1 hypothetical protein L798_00831 [Zootermopsis nevadensis]	Pvs28 EGF domain		Uncharacterized histidine-rich protein DDB_G0274557 OS=Dictyostelium discoideum GN=DDB_G0274557 PE=3 SV=1		Homeobox	K02104//protein giant-lens (argos)+ko04320//Dorso-ventral axis formation+ko04013//MAPK signaling pathway - fly;K17335//nuclear factor of activated T-cells 5;K09309//homeobox protein Nkx-1;K20813//thymine-DNA glycosylase [EC:3.2.2.29]+ko03410//Base excision repair
CL3846.Contig2_All	ko03460//Fanconi anemia pathway;ko03440//Homologous recombination	Replication and repair	Genetic Information Processing	Novel_gene	6721	5.93	5.09	4.15	2.39	1.99	3.1	-1.01849	5.84183e-124	8.68656e-125		PREDICTED: Bloom syndrome protein homolog [Acyrthosiphon pisum]	RQC domain	[L] KOG0351 ATP-dependent DNA helicase	Bloom syndrome protein homolog OS=Gallus gallus GN=BLM PE=1 SV=2	GO:0006281//DNA repair;GO:0005524//ATP binding;GO:0006260//DNA replication;GO:0043140//ATP-dependent 3'-5' DNA helicase activity;GO:0005622//intracellular;GO:0006310//DNA recombination;GO:0003676//nucleic acid binding		K10901//bloom syndrome protein [EC:3.6.4.12]+ko03440//Homologous recombination+ko03460//Fanconi anemia pathway;K10901//bloom syndrome protein [EC:3.6.4.12]+ko03440//Homologous recombination+ko03460//Fanconi anemia pathway;K10901//bloom syndrome protein [EC:3.6.4.12]+ko03440//Homologous recombination+ko03460//Fanconi anemia pathway;K10901//bloom syndrome protein [EC:3.6.4.12]+ko03440//Homologous r…
CL3905.Contig4_All	ko05168//Herpes simplex infection;ko04137//Mitophagy - animal;ko04064//NF-kappa B signaling pathway;ko03008//Ribosome biogenesis in eukaryotes;ko05162//Measles;ko04520//Adherens junction;ko04310//Wnt signaling pathway	Signal transduction;Transport and catabolism;Translation;Infectious diseases: Viral;Cellular community - eukaryotes	Genetic Information Processing;Cellular Processes;Environmental Information Processing;Human Diseases	Novel_gene	5024	4.07	3.2	4.27	1.7	1.9	1.74	-1.10929	3.70076e-81	8.25029e-82	EF554579.1 Danaus plexippus casein kinase II alpha subunit (CKIIa) mRNA, complete cds	PREDICTED: casein kinase II subunit alpha isoform X3 [Acyrthosiphon pisum] >XP_008181371.1 PREDICTED: casein kinase II subunit alpha isoform X3 [Acyrthosiphon pisum] >XP_022167740.1 casein kinase II subunit alpha isoform X3 [Myzus persicae] >XP_022167742.1 casein kinase II subunit alpha isoform X3 [Myzus persicae]	Protein kinase domain	[TDK] KOG0668 Casein kinase II, alpha subunit	Casein kinase II subunit alpha OS=Drosophila melanogaster GN=CkIIalpha PE=1 SV=2	GO:0043154//negative regulation of cysteine-type endopeptidase activity involved in apoptotic process;GO:0005524//ATP binding;GO:0006355//regulation of transcription, DNA-templated;GO:1905818//regulation of chromosome separation;GO:0030307//positive regulation of cell growth;GO:0005634//nucleus;GO:0006468//protein phosphorylation;GO:0006351//transcription, DNA-templated;GO:0048511//rhythmic proce…	zf-C2H2	K03097//casein kinase II subunit alpha [EC:2.7.11.1]+ko04310//Wnt signaling pathway+ko04137//Mitophagy - animal+ko04520//Adherens junction+ko03008//Ribosome biogenesis in eukaryotes+ko04064//NF-kappa B signaling pathway+ko05162//Measles+ko05168//Herpes simplex infection;K03097//casein kinase II subunit alpha [EC:2.7.11.1]+ko04310//Wnt signaling pathway+ko04137//Mitophagy - animal+ko04520//Adheren…
CL3911.Contig3_All	ko00330//Arginine and proline metabolism;ko01100//Metabolic pathways;ko00480//Glutathione metabolism	Amino acid metabolism;Global and overview maps;Metabolism of other amino acids	Metabolism	Novel_gene	6353	16.95	9.02	10.14	3.78	2.1	2.12	-2.16062	0	0		Transposon Tf2-8 polyprotein [Thelohanellus kitauei]	Pyridoxal-dependent decarboxylase, pyridoxal binding domain	[E] KOG0622 Ornithine decarboxylase	Ornithine decarboxylase OS=Trypanosoma brucei brucei PE=1 SV=2			K01581//ornithine decarboxylase [EC:4.1.1.17]+ko00330//Arginine and proline metabolism+ko00480//Glutathione metabolism+ko01100//Metabolic pathways;K01581//ornithine decarboxylase [EC:4.1.1.17]+ko00330//Arginine and proline metabolism+ko00480//Glutathione metabolism+ko01100//Metabolic pathways;K01581//ornithine decarboxylase [EC:4.1.1.17]+ko00330//Arginine and proline metabolism+ko00480//Glutathio…
CL3954.Contig3_All	ko05165//Human papillomavirus infection;ko05222//Small cell lung cancer;ko04974//Protein digestion and absorption;ko04510//Focal adhesion;ko04933//AGE-RAGE signaling pathway in diabetic complications;ko04512//ECM-receptor interaction;ko05146//Amoebiasis;ko04926//Relaxin signaling pathway;ko04611//Platelet activation;ko05200//Pathways in cancer;ko04151//PI3K-Akt signaling pathway	Signal transduction;Endocrine and metabolic diseases;Cancers: Specific types;Digestive system;Signaling molecules and interaction;Infectious diseases: Viral;Immune system;Cancers: Overview;Infectious diseases: Parasitic;Endocrine system;Cellular community - eukaryotes	Cellular Processes;Human Diseases;Environmental Information Processing;Organismal Systems	Novel_gene	2810	15.88	6.56	8.07	3.44	2.02	1.86	-2.04645	5.70885e-287	3.69214e-288		uncharacterized protein LOC111037581 isoform X2 [Myzus persicae]	Insect cuticle protein			GO:0042302//structural constituent of cuticle		K19720//collagen, type III, alpha+ko04933//AGE-RAGE signaling pathway in diabetic complications+ko04611//Platelet activation+ko05146//Amoebiasis+ko04974//Protein digestion and absorption+ko04926//Relaxin signaling pathway;K06237//collagen, type IV, alpha+ko05222//Small cell lung cancer+ko04512//ECM-receptor interaction+ko04510//Focal adhesion+ko04933//AGE-RAGE signaling pathway in diabetic compli…
CL3963.Contig7_All	ko04211//Longevity regulating pathway;ko04136//Autophagy - other;ko04140//Autophagy - animal	Aging;Transport and catabolism	Organismal Systems;Cellular Processes	Novel_gene	4376	7.31	4.14	4.81	3.13	2.51	1.75	-1.12964	6.01471e-102	1.07676e-102		autophagy-related protein 13 homolog isoform X1 [Athalia rosae]	Autophagy-related protein 13	[S] KOG3874 Uncharacterized conserved protein	Autophagy-related protein 13 OS=Mus musculus GN=Atg13 PE=1 SV=2			K08331//autophagy-related protein 13+ko04140//Autophagy - animal+ko04211//Longevity regulating pathway+ko04136//Autophagy - other;K08331//autophagy-related protein 13+ko04140//Autophagy - animal+ko04211//Longevity regulating pathway+ko04136//Autophagy - other;K08331//autophagy-related protein 13+ko04140//Autophagy - animal+ko04211//Longevity regulating pathway+ko04136//Autophagy - other;K08331//a…
CL3963.Contig8_All	ko04211//Longevity regulating pathway;ko04140//Autophagy - animal;ko04136//Autophagy - other	Aging;Transport and catabolism	Cellular Processes;Organismal Systems	Novel_gene	4275	8.21	10.3	12.4	5.47	2.76	6.72	-1.04256	4.43996e-165	4.9467e-166		autophagy-related protein 13 homolog isoform X1 [Athalia rosae]	Autophagy-related protein 13	[S] KOG3874 Uncharacterized conserved protein	Autophagy-related protein 13 OS=Mus musculus GN=Atg13 PE=1 SV=2			K08331//autophagy-related protein 13+ko04140//Autophagy - animal+ko04211//Longevity regulating pathway+ko04136//Autophagy - other;K08331//autophagy-related protein 13+ko04140//Autophagy - animal+ko04211//Longevity regulating pathway+ko04136//Autophagy - other;K08331//autophagy-related protein 13+ko04140//Autophagy - animal+ko04211//Longevity regulating pathway+ko04136//Autophagy - other;K08331//a…
CL3963.Contig9_All	ko04211//Longevity regulating pathway;ko04140//Autophagy - animal;ko04136//Autophagy - other	Aging;Transport and catabolism	Cellular Processes;Organismal Systems	Novel_gene	4377	8.61	6.92	8.33	2.61	2.57	3.37	-1.48007	1.64646e-225	1.33864e-226		autophagy-related protein 13 homolog isoform X1 [Athalia rosae]	Autophagy-related protein 13	[S] KOG3874 Uncharacterized conserved protein	Autophagy-related protein 13 OS=Mus musculus GN=Atg13 PE=1 SV=2			K08331//autophagy-related protein 13+ko04140//Autophagy - animal+ko04211//Longevity regulating pathway+ko04136//Autophagy - other;K08331//autophagy-related protein 13+ko04140//Autophagy - animal+ko04211//Longevity regulating pathway+ko04136//Autophagy - other;K08331//autophagy-related protein 13+ko04140//Autophagy - animal+ko04211//Longevity regulating pathway+ko04136//Autophagy - other;K08331//a…
CL3981.Contig2_All	ko04140//Autophagy - animal;ko04621//NOD-like receptor signaling pathway;ko04210//Apoptosis;ko04924//Renin secretion;ko04142//Lysosome;ko04612//Antigen processing and presentation	Endocrine system;Cell growth and death;Transport and catabolism;Immune system	Organismal Systems;Cellular Processes	Novel_gene	1104	37.5	33.65	35.26	15.17	14.86	15.4	-1.22107	2.61555e-177	2.72643e-178		cathepsin B endopeptidase, putative [Ixodes scapularis] >EEC01212.1 cathepsin B endopeptidase, putative [Ixodes scapularis]	Papain family cysteine protease	[O] KOG1543 Cysteine proteinase Cathepsin L	Cathepsin B OS=Pongo abelii GN=CTSB PE=2 SV=1	GO:0005615//extracellular space;GO:0051603//proteolysis involved in cellular protein catabolic process;GO:0008234//cysteine-type peptidase activity;GO:0004197//cysteine-type endopeptidase activity;GO:0005764//lysosome;GO:0050790//regulation of catalytic activity		K01363//cathepsin B [EC:3.4.22.1]+ko04140//Autophagy - animal+ko04142//Lysosome+ko04210//Apoptosis+ko04612//Antigen processing and presentation+ko04621//NOD-like receptor signaling pathway+ko04924//Renin secretion;K01363//cathepsin B [EC:3.4.22.1]+ko04140//Autophagy - animal+ko04142//Lysosome+ko04210//Apoptosis+ko04612//Antigen processing and presentation+ko04621//NOD-like receptor signaling path…
CL3999.Contig1_All	ko04923//Regulation of lipolysis in adipocytes;ko00561//Glycerolipid metabolism;ko01100//Metabolic pathways;ko04714//Thermogenesis	Global and overview maps;Environmental adaptation;Lipid metabolism;Endocrine system	Organismal Systems;Metabolism	Novel_gene	2341	14.26	9.73	21.11	7.94	7.47	6.93	-1.00678	1.64215e-122	2.46323e-123		sodium/hydrogen exchanger 9B2 [Zootermopsis nevadensis] >KDR15092.1 Mitochondrial sodium/hydrogen exchanger NHA2 [Zootermopsis nevadensis]	Sodium/hydrogen exchanger family	[P] KOG3826 Na+/H+ antiporter	Sodium/hydrogen exchanger 9B2 OS=Pongo abelii GN=SLC9B2 PE=2 SV=1			K16816//patatin-like phospholipase domain-containing protein 2 [EC:3.1.1.3]+ko04714//Thermogenesis+ko00561//Glycerolipid metabolism+ko01100//Metabolic pathways+ko04923//Regulation of lipolysis in adipocytes;K14726//solute carrier family 9 (sodium/hydrogen exchanger), member 10/11
CL4.Contig2_All	ko00531//Glycosaminoglycan degradation;ko04142//Lysosome;ko01100//Metabolic pathways	Glycan biosynthesis and metabolism;Global and overview maps;Transport and catabolism	Metabolism;Cellular Processes	Novel_gene	904	7.38	11.09	9.44	5.58	2.3	5.68	-1.02491	1.5575e-29	7.81631e-30		arylsulfatase B-like [Zootermopsis nevadensis] >XP_021929308.1 arylsulfatase B-like [Zootermopsis nevadensis] >KDR14503.1 Arylsulfatase B [Zootermopsis nevadensis]	C-terminal region of aryl-sulfatase	[R] KOG3867 Sulfatase	Arylsulfatase B OS=Mus musculus GN=Arsb PE=1 SV=3	GO:0008152//metabolic process;GO:0008484//sulfuric ester hydrolase activity		K01135//arylsulfatase B [EC:3.1.6.12]+ko04142//Lysosome+ko00531//Glycosaminoglycan degradation+ko01100//Metabolic pathways;K13100//pre-mRNA-splicing factor CWC22;K12375//arylsulfatase I/J [EC:3.1.6.-];K01135//arylsulfatase B [EC:3.1.6.12]+ko04142//Lysosome+ko00531//Glycosaminoglycan degradation+ko01100//Metabolic pathways
CL4012.Contig1_All	ko01100//Metabolic pathways;ko00561//Glycerolipid metabolism;ko00564//Glycerophospholipid metabolism	Global and overview maps;Lipid metabolism	Metabolism	Novel_gene	2196	13.76	12.26	12.56	3.6	1.23	3.34	-2.22571	0	0		PREDICTED: glycerol-3-phosphate acyltransferase 3 [Diuraphis noxia]	Acyltransferase	[I] KOG2898 Predicted phosphate acyltransferase, contains PlsC domain	Glycerol-3-phosphate acyltransferase 3 OS=Mus musculus GN=Gpat3 PE=1 SV=1			K13506//glycerol-3-phosphate O-acyltransferase 3/4 [EC:2.3.1.15]+ko00564//Glycerophospholipid metabolism+ko00561//Glycerolipid metabolism+ko01100//Metabolic pathways;K13506//glycerol-3-phosphate O-acyltransferase 3/4 [EC:2.3.1.15]+ko00564//Glycerophospholipid metabolism+ko00561//Glycerolipid metabolism+ko01100//Metabolic pathways;K13506//glycerol-3-phosphate O-acyltransferase 3/4 [EC:2.3.1.15]+ko…
CL4016.Contig7_All	ko01100//Metabolic pathways;ko00600//Sphingolipid metabolism	Global and overview maps;Lipid metabolism	Metabolism	Novel_gene	3684	7.28	7.45	9.55	2.03	1.38	2.13	-2.12515	0	0		3-ketodihydrosphingosine reductase isoform X3 [Zootermopsis nevadensis] >KDR24480.1 3-ketodihydrosphingosine reductase [Zootermopsis nevadensis]	short chain dehydrogenase	[Q] KOG1210 Predicted 3-ketosphinganine reductase	3-ketodihydrosphingosine reductase OS=Bos taurus GN=KDSR PE=2 SV=1			K04708//3-dehydrosphinganine reductase [EC:1.1.1.102]+ko00600//Sphingolipid metabolism+ko01100//Metabolic pathways;K04708//3-dehydrosphinganine reductase [EC:1.1.1.102]+ko00600//Sphingolipid metabolism+ko01100//Metabolic pathways;K04708//3-dehydrosphinganine reductase [EC:1.1.1.102]+ko00600//Sphingolipid metabolism+ko01100//Metabolic pathways;K04708//3-dehydrosphinganine reductase [EC:1.1.1.102]+…
CL4021.Contig4_All	ko00640//Propanoate metabolism;ko00410//beta-Alanine metabolism;ko00071//Fatty acid degradation;ko01100//Metabolic pathways;ko03320//PPAR signaling pathway;ko00280//Valine, leucine and isoleucine degradation;ko01200//Carbon metabolism;ko01212//Fatty acid metabolism	Global and overview maps;Amino acid metabolism;Lipid metabolism;Carbohydrate metabolism;Metabolism of other amino acids;Endocrine system	Organismal Systems;Metabolism	Novel_gene	2048	78.97	67.32	65.45	8.95	6.33	11.46	-2.9804	0	0		PREDICTED: probable medium-chain specific acyl-CoA dehydrogenase, mitochondrial [Tribolium castaneum] >EEZ99771.1 putative medium-chain specific acyl-CoA dehydrogenase, mitochondrial-like Protein [Tribolium castaneum]	Acyl-CoA dehydrogenase, C-terminal domain	[I] KOG0140 Medium-chain acyl-CoA dehydrogenase	Probable medium-chain specific acyl-CoA dehydrogenase, mitochondrial OS=Drosophila melanogaster GN=CG12262 PE=2 SV=1	GO:0006635//fatty acid beta-oxidation;GO:0050660//flavin adenine dinucleotide binding;GO:0003995//acyl-CoA dehydrogenase activity;GO:0070991//medium-chain-acyl-CoA dehydrogenase activity;GO:0005739//mitochondrion		K00249//acyl-CoA dehydrogenase [EC:1.3.8.7]+ko00410//beta-Alanine metabolism+ko03320//PPAR signaling pathway+ko01200//Carbon metabolism+ko00640//Propanoate metabolism+ko00280//Valine, leucine and isoleucine degradation+ko01100//Metabolic pathways+ko01212//Fatty acid metabolism+ko00071//Fatty acid degradation;K00249//acyl-CoA dehydrogenase [EC:1.3.8.7]+ko00410//beta-Alanine metabolism+ko03320//PPA…
CL4042.Contig11_All	ko04144//Endocytosis	Transport and catabolism	Cellular Processes	Novel_gene	3868	7.62	5.42	7.89	3.23	2.14	3.73	-1.1962	3.12233e-126	4.53757e-127	XM_019903411.1 PREDICTED: Dendroctonus ponderosae epsin-2 (LOC109536928), transcript variant X5, mRNA	epsin-2 isoform X1 [Zootermopsis nevadensis] >XP_021925753.1 epsin-2 isoform X1 [Zootermopsis nevadensis] >XP_021925754.1 epsin-2 isoform X1 [Zootermopsis nevadensis] >XP_021925755.1 epsin-2 isoform X1 [Zootermopsis nevadensis] >XP_021925756.1 epsin-2 isoform X1 [Zootermopsis nevadensis] >XP_021925757.1 epsin-2 isoform X1 [Zootermopsis nevadensis] >XP_021925758.1 epsin-2 isoform X1 [Zootermopsis …	ENTH domain	[F] KOG2056 Equilibrative nucleoside transporter protein	Epsin-2 OS=Mus musculus GN=Epn2 PE=1 SV=1			K12471//epsin+ko04144//Endocytosis;K12471//epsin+ko04144//Endocytosis;K12471//epsin+ko04144//Endocytosis;K12471//epsin+ko04144//Endocytosis;K12471//epsin+ko04144//Endocytosis
CL4047.Contig1_All	ko03040//Spliceosome	Transcription	Genetic Information Processing	Novel_gene	730	11.56	10.73	9.21	4.85	3.82	6.89	-1.00759	1.06233e-25	5.86939e-26	XM_009436991.2 PREDICTED: Pan troglodytes RALY heterogeneous nuclear ribonucleoprotein (RALY), transcript variant X10, mRNA	Poly(U)-binding-splicing factor half pint [Zootermopsis nevadensis]	Mediator complex subunit 3 fungal	[A] KOG0124 Polypyrimidine tract-binding protein PUF60 (RRM superfamily)	Poly(U)-binding-splicing factor half pint OS=Drosophila melanogaster GN=pUf68 PE=1 SV=2			K12838//poly(U)-binding-splicing factor PUF60+ko03040//Spliceosome;K12838//poly(U)-binding-splicing factor PUF60+ko03040//Spliceosome;K12838//poly(U)-binding-splicing factor PUF60+ko03040//Spliceosome;K12838//poly(U)-binding-splicing factor PUF60+ko03040//Spliceosome
CL4084.Contig4_All	ko04380//Osteoclast differentiation	Development	Organismal Systems	Novel_gene	3677	35.75	14.18	28.34	18.28	10.58	2.75	-1.28708	0	0	FQ790365.5 Zebrafish DNA sequence from clone CH1073-212K2 in linkage group 1, complete sequence	PREDICTED: four and a half LIM domains protein 2 isoform X6 [Bemisia tabaci]	LIM domain	[TZR] KOG1704 FOG: LIM domain	Four and a half LIM domains protein 2 OS=Bos taurus GN=FHL2 PE=2 SV=1		Homeobox	K14380//four and a half LIM domains protein 2+ko04380//Osteoclast differentiation
CL411.Contig4_All	ko00140//Steroid hormone biosynthesis	Lipid metabolism	Metabolism	Novel_gene	1111	8.77	4.4	2.05	2.59	1.32	1.98	-1.35501	2.11393e-31	1.01446e-31		estrogen sulfotransferase-like [Nilaparvata lugens]	Sulfotransferase domain	[R] KOG1584 Sulfotransferase	Sulfotransferase 1 family member D1 OS=Mus musculus GN=Sult1d1 PE=1 SV=1			K01016//estrone sulfotransferase [EC:2.8.2.4]+ko00140//Steroid hormone biosynthesis;K01016//estrone sulfotransferase [EC:2.8.2.4]+ko00140//Steroid hormone biosynthesis;K01016//estrone sulfotransferase [EC:2.8.2.4]+ko00140//Steroid hormone biosynthesis;K01016//estrone sulfotransferase [EC:2.8.2.4]+ko00140//Steroid hormone biosynthesis
CL411.Contig7_All	ko00140//Steroid hormone biosynthesis	Lipid metabolism	Metabolism	Novel_gene	1112	15.84	23.15	19.36	7.18	8.11	8.71	-1.27828	5.94602e-106	1.02634e-106		hypothetical protein TSAR_000956 [Trichomalopsis sarcophagae]	Sulfotransferase domain	[R] KOG1584 Sulfotransferase	Sulfotransferase 1C4 OS=Homo sapiens GN=SULT1C4 PE=1 SV=2			K01016//estrone sulfotransferase [EC:2.8.2.4]+ko00140//Steroid hormone biosynthesis;K01016//estrone sulfotransferase [EC:2.8.2.4]+ko00140//Steroid hormone biosynthesis;K01016//estrone sulfotransferase [EC:2.8.2.4]+ko00140//Steroid hormone biosynthesis;K01016//estrone sulfotransferase [EC:2.8.2.4]+ko00140//Steroid hormone biosynthesis
CL4117.Contig2_All	ko05206//MicroRNAs in cancer	Cancers: Overview	Human Diseases	Novel_gene	2422	11.74	11.27	12.38	4.61	5.5	5.5	-1.18157	3.18736e-129	4.51427e-130		PREDICTED: NHL repeat-containing protein 2 [Bemisia tabaci]	NHL repeat	[O] KOG2177 Predicted E3 ubiquitin ligase	NHL repeat-containing protein 2 OS=Gallus gallus GN=NHLRC2 PE=2 SV=1	GO:0005623//cell;GO:0045454//cell redox homeostasis		K12035//tripartite motif-containing protein 71 [EC:2.3.2.27]+ko05206//MicroRNAs in cancer;K12035//tripartite motif-containing protein 71 [EC:2.3.2.27]+ko05206//MicroRNAs in cancer;K12035//tripartite motif-containing protein 71 [EC:2.3.2.27]+ko05206//MicroRNAs in cancer;K12035//tripartite motif-containing protein 71 [EC:2.3.2.27]+ko05206//MicroRNAs in cancer;K12035//tripartite motif-containing pro…
CL4119.Contig4_All	ko05322//Systemic lupus erythematosus;ko05034//Alcoholism;ko05203//Viral carcinogenesis;ko05202//Transcriptional misregulation in cancer	Substance dependence;Cancers: Overview;Immune diseases	Human Diseases	Novel_gene	490	13.95	13.59	12.78	4.41	4.05	5.3	-1.5361	7.38907e-39	3.0239e-39	AF378198.1 Rhynchosciara americana histone H1 (rah1), histone H3 (rah3), histone H4 (rah4), histone H2A (rah2a), and histone H2B (rah2b) genes, complete cds	PREDICTED: uncharacterized protein LOC102454723 [Pelodiscus sinensis]	Core histone H2A/H2B/H3/H4	[B] KOG1745 Histones H3 and H4	Histone H3 OS=Urechis caupo PE=1 SV=2			K11253//histone H3+ko05322//Systemic lupus erythematosus+ko05034//Alcoholism+ko05202//Transcriptional misregulation in cancer;K11253//histone H3+ko05322//Systemic lupus erythematosus+ko05034//Alcoholism+ko05202//Transcriptional misregulation in cancer;K11253//histone H3+ko05322//Systemic lupus erythematosus+ko05034//Alcoholism+ko05202//Transcriptional misregulation in cancer;K11253//histone H3+ko…
CL415.Contig1_All	ko04341//Hedgehog signaling pathway - fly;ko04340//Hedgehog signaling pathway	Signal transduction	Environmental Information Processing	Novel_gene	4886	27.96	25.93	21	7.39	4.35	3.13	-2.3194	0	0	XM_015748732.1 PREDICTED: Cephus cinctus protein roadkill (LOC107272003), transcript variant X8, mRNA	PREDICTED: protein roadkill isoform X3 [Tribolium castaneum]	BTB/POZ domain	[DR] KOG1987 Speckle-type POZ protein SPOP and related proteins with TRAF, MATH and BTB/POZ domains	Protein roadkill OS=Drosophila melanogaster GN=rdx PE=1 SV=2		Others	K10523//speckle-type POZ protein+ko04341//Hedgehog signaling pathway - fly+ko04340//Hedgehog signaling pathway;K10523//speckle-type POZ protein+ko04341//Hedgehog signaling pathway - fly+ko04340//Hedgehog signaling pathway;K10523//speckle-type POZ protein+ko04341//Hedgehog signaling pathway - fly+ko04340//Hedgehog signaling pathway;K10523//speckle-type POZ protein+ko04341//Hedgehog signaling pathw…
CL4181.Contig10_All	ko04146//Peroxisome	Transport and catabolism	Cellular Processes	Novel_gene	1003	11.7	10.48	8.93	3.11	3.96	4.04	-1.48273	6.79206e-64	1.84641e-64		PREDICTED: phytanoyl-CoA dioxygenase domain-containing protein 1 homolog [Camponotus floridanus] >EFN66675.1 Phytanoyl-CoA dioxygenase domain-containing protein 1-like protein [Camponotus floridanus]	Phytanoyl-CoA dioxygenase (PhyH)	[I] KOG3290 Peroxisomal phytanoyl-CoA hydroxylase	Phytanoyl-CoA dioxygenase domain-containing protein 1 OS=Danio rerio GN=phyhd1 PE=2 SV=1	GO:0051213//dioxygenase activity		K00477//phytanoyl-CoA hydroxylase [EC:1.14.11.18]+ko04146//Peroxisome;K00477//phytanoyl-CoA hydroxylase [EC:1.14.11.18]+ko04146//Peroxisome;K00477//phytanoyl-CoA hydroxylase [EC:1.14.11.18]+ko04146//Peroxisome;K00477//phytanoyl-CoA hydroxylase [EC:1.14.11.18]+ko04146//Peroxisome;K00477//phytanoyl-CoA hydroxylase [EC:1.14.11.18]+ko04146//Peroxisome
CL4181.Contig9_All	ko04146//Peroxisome	Transport and catabolism	Cellular Processes	Novel_gene	1231	4.17	5.41	2.9	1.25	1.92	2.53	-1.13485	2.6768e-22	1.62092e-22		PREDICTED: phytanoyl-CoA dioxygenase domain-containing protein 1 homolog [Camponotus floridanus] >EFN66675.1 Phytanoyl-CoA dioxygenase domain-containing protein 1-like protein [Camponotus floridanus]	Phytanoyl-CoA dioxygenase (PhyH)	[I] KOG3290 Peroxisomal phytanoyl-CoA hydroxylase	Phytanoyl-CoA dioxygenase domain-containing protein 1 OS=Danio rerio GN=phyhd1 PE=2 SV=1	GO:0051213//dioxygenase activity		K00477//phytanoyl-CoA hydroxylase [EC:1.14.11.18]+ko04146//Peroxisome;K00477//phytanoyl-CoA hydroxylase [EC:1.14.11.18]+ko04146//Peroxisome;K00477//phytanoyl-CoA hydroxylase [EC:1.14.11.18]+ko04146//Peroxisome;K00477//phytanoyl-CoA hydroxylase [EC:1.14.11.18]+ko04146//Peroxisome;K00477//phytanoyl-CoA hydroxylase [EC:1.14.11.18]+ko04146//Peroxisome
CL4203.Contig1_All	ko05164//Influenza A	Infectious diseases: Viral	Human Diseases	Novel_gene	2913	64.54	55.85	62.42	10.95	10.23	4.59	-2.81811	0	0	XM_014368013.1 PREDICTED: Trichogramma pretiosum importin subunit alpha-3 (LOC106650153), transcript variant X2, mRNA	importin subunit alpha-3 [Zootermopsis nevadensis] >KDR10659.1 Importin subunit alpha-4 [Zootermopsis nevadensis]	Armadillo/beta-catenin-like repeat	[U] KOG0166 Karyopherin (importin) alpha	Importin subunit alpha-3 OS=Mus musculus GN=Kpna4 PE=1 SV=1	GO:0005634//nucleus;GO:0008565//protein transporter activity;GO:0006606//protein import into nucleus;GO:0005737//cytoplasm		K15043//importin subunit alpha-2+ko05164//Influenza A;K15043//importin subunit alpha-2+ko05164//Influenza A;K15043//importin subunit alpha-2+ko05164//Influenza A;K15043//importin subunit alpha-2+ko05164//Influenza A
CL437.Contig1_All	ko04727//GABAergic synapse;ko05032//Morphine addiction;ko04723//Retrograde endocannabinoid signaling;ko05414//Dilated cardiomyopathy (DCM);ko05410//Hypertrophic cardiomyopathy (HCM);ko05033//Nicotine addiction;ko04080//Neuroactive ligand-receptor interaction;ko05014//Amyotrophic lateral sclerosis (ALS)	Substance dependence;Neurodegenerative diseases;Signaling molecules and interaction;Cardiovascular diseases;Nervous system	Environmental Information Processing;Human Diseases;Organismal Systems	Novel_gene	1637	4.23	6.28	9.52	2.61	2.44	3.98	-1.14675	3.08358e-47	1.08261e-47		hypothetical protein [Trichomonas vaginalis G3] >EAX98561.1 conserved hypothetical protein [Trichomonas vaginalis G3]		[R] KOG0382 Carbonic anhydrase	Fibroin heavy chain OS=Bombyx mori GN=FIBH PE=1 SV=4		Homeobox	K05185//gamma-aminobutyric acid receptor subunit epsilon+ko04727//GABAergic synapse+ko04723//Retrograde endocannabinoid signaling+ko05033//Nicotine addiction+ko05032//Morphine addiction+ko04080//Neuroactive ligand-receptor interaction;K12567//titin [EC:2.7.11.1]+ko05414//Dilated cardiomyopathy (DCM)+ko05410//Hypertrophic cardiomyopathy (HCM);K12567//titin [EC:2.7.11.1]+ko05414//Dilated cardiomyop…
CL448.Contig2_All	ko01100//Metabolic pathways;ko00040//Pentose and glucuronate interconversions;ko00051//Fructose and mannose metabolism	Carbohydrate metabolism;Global and overview maps	Metabolism	Novel_gene	3194	5.79	7.14	7.49	1.04	1.9	1.93	-2.07539	1.50168e-223	1.22419e-224		sorbitol dehydrogenase-like isoform X1 [Zootermopsis nevadensis] >XP_021922090.1 sorbitol dehydrogenase-like isoform X2 [Zootermopsis nevadensis]	Alcohol dehydrogenase GroES-like domain	[Q] KOG0024 Sorbitol dehydrogenase	Sorbitol dehydrogenase OS=Mus musculus GN=Sord PE=1 SV=3			K00008//L-iditol 2-dehydrogenase [EC:1.1.1.14]+ko00040//Pentose and glucuronate interconversions+ko00051//Fructose and mannose metabolism+ko01100//Metabolic pathways;K00008//L-iditol 2-dehydrogenase [EC:1.1.1.14]+ko00040//Pentose and glucuronate interconversions+ko00051//Fructose and mannose metabolism+ko01100//Metabolic pathways;K00008//L-iditol 2-dehydrogenase [EC:1.1.1.14]+ko00040//Pentose and…
CL468.Contig2_All	ko00983//Drug metabolism - other enzymes;ko01100//Metabolic pathways;ko00240//Pyrimidine metabolism	Global and overview maps;Nucleotide metabolism;Xenobiotics biodegradation and metabolism	Metabolism	Novel_gene	1672	15.64	34.73	16.04	8.08	3.87	6.89	-1.80736	0	0		PREDICTED: uridine phosphorylase 1 isoform X1 [Diachasma alloeum] >XP_015108450.1 PREDICTED: uridine phosphorylase 1 isoform X1 [Diachasma alloeum]	Phosphorylase superfamily	[F] KOG3728 Uridine phosphorylase	Uridine phosphorylase 1 OS=Homo sapiens GN=UPP1 PE=1 SV=1			K00757//uridine phosphorylase [EC:2.4.2.3]+ko00983//Drug metabolism - other enzymes+ko00240//Pyrimidine metabolism+ko01100//Metabolic pathways;K00757//uridine phosphorylase [EC:2.4.2.3]+ko00983//Drug metabolism - other enzymes+ko00240//Pyrimidine metabolism+ko01100//Metabolic pathways;K00757//uridine phosphorylase [EC:2.4.2.3]+ko00983//Drug metabolism - other enzymes+ko00240//Pyrimidine metabolis…
CL468.Contig3_All	ko01100//Metabolic pathways;ko00240//Pyrimidine metabolism;ko00983//Drug metabolism - other enzymes	Xenobiotics biodegradation and metabolism;Nucleotide metabolism;Global and overview maps	Metabolism	Novel_gene	1504	39.21	19.65	18.15	9.36	10.75	14.63	-1.1484	1.56399e-162	1.77309e-163		PREDICTED: uridine phosphorylase 1 isoform X1 [Diachasma alloeum] >XP_015108450.1 PREDICTED: uridine phosphorylase 1 isoform X1 [Diachasma alloeum]	Phosphorylase superfamily	[F] KOG3728 Uridine phosphorylase	Uridine phosphorylase 1 OS=Homo sapiens GN=UPP1 PE=1 SV=1			K00757//uridine phosphorylase [EC:2.4.2.3]+ko00983//Drug metabolism - other enzymes+ko00240//Pyrimidine metabolism+ko01100//Metabolic pathways;K00757//uridine phosphorylase [EC:2.4.2.3]+ko00983//Drug metabolism - other enzymes+ko00240//Pyrimidine metabolism+ko01100//Metabolic pathways;K00757//uridine phosphorylase [EC:2.4.2.3]+ko00983//Drug metabolism - other enzymes+ko00240//Pyrimidine metabolis…
CL48.Contig6_All	ko03040//Spliceosome	Transcription	Genetic Information Processing	Novel_gene	6098	18.09	23.36	25.55	6.82	13.04	11.44	-1.10561	0	0	XM_014347973.1 PREDICTED: Copidosoma floridanum pre-mRNA-splicing factor SYF1 (LOC106635822), mRNA	pre-mRNA-splicing factor SYF1 isoform X1 [Nilaparvata lugens]	Tetratricopeptide repeat	[A] KOG2047 mRNA splicing factor	Pre-mRNA-splicing factor SYF1 OS=Rattus norvegicus GN=Xab2 PE=2 SV=1	GO:0006396//RNA processing		K12867//pre-mRNA-splicing factor SYF1+ko03040//Spliceosome;K12867//pre-mRNA-splicing factor SYF1+ko03040//Spliceosome;K12867//pre-mRNA-splicing factor SYF1+ko03040//Spliceosome;K12867//pre-mRNA-splicing factor SYF1+ko03040//Spliceosome;K12867//pre-mRNA-splicing factor SYF1+ko03040//Spliceosome
CL526.Contig1_All	ko01100//Metabolic pathways	Global and overview maps	Metabolism	Novel_gene	2558	11.14	11.44	11.13	4.45	2.14	9.81	-1.03852	4.60708e-106	7.94722e-107		tRNA dimethylallyltransferase, mitochondrial isoform X1 [Zootermopsis nevadensis]	IPP transferase	[J] KOG1384 tRNA delta(2)-isopentenylpyrophosphate transferase	tRNA dimethylallyltransferase, mitochondrial OS=Mus musculus GN=Trit1 PE=2 SV=2			K00791//tRNA dimethylallyltransferase [EC:2.5.1.75]+ko01100//Metabolic pathways;K00791//tRNA dimethylallyltransferase [EC:2.5.1.75]+ko01100//Metabolic pathways;K00791//tRNA dimethylallyltransferase [EC:2.5.1.75]+ko01100//Metabolic pathways;K00791//tRNA dimethylallyltransferase [EC:2.5.1.75]+ko01100//Metabolic pathways;K00791//tRNA dimethylallyltransferase [EC:2.5.1.75]+ko01100//Metabolic pathways
CL55.Contig2_All	ko03010//Ribosome	Translation	Genetic Information Processing	Novel_gene	1192	280.47	193.44	230.75	119.71	96.92	119.95	-1.05728	0	0	XM_014357125.1 PREDICTED: Copidosoma floridanum 40S ribosomal protein SA (LOC106642366), mRNA	RecName: Full=40S ribosomal protein SA >ABM55561.1 putative ribosomal protein SA [Maconellicoccus hirsutus]	Ribosomal protein S2	[J] KOG0830 40S ribosomal protein SA (P40)/Laminin receptor 1	40S ribosomal protein SA OS=Maconellicoccus hirsutus PE=2 SV=1	GO:0000028//ribosomal small subunit assembly;GO:0006412//translation;GO:0003735//structural constituent of ribosome;GO:0022627//cytosolic small ribosomal subunit		K02998//small subunit ribosomal protein SAe+ko03010//Ribosome;K02998//small subunit ribosomal protein SAe+ko03010//Ribosome;K02998//small subunit ribosomal protein SAe+ko03010//Ribosome;K02998//small subunit ribosomal protein SAe+ko03010//Ribosome;K02998//small subunit ribosomal protein SAe+ko03010//Ribosome
CL584.Contig1_All	ko05322//Systemic lupus erythematosus;ko04217//Necroptosis;ko05034//Alcoholism	Immune diseases;Cell growth and death;Substance dependence	Cellular Processes;Human Diseases	Novel_gene	382	4.13	4.32	2.34	1.22	1.1	1.72	-1.39513	6.12866e-08	6.83346e-08	XM_014380618.1 PREDICTED: Trichogramma pretiosum histone H2A (LOC106658604), mRNA	histone H2A-like [Athalia rosae]	C-terminus of histone H2A	[B] KOG1756 Histone 2A	Histone H2A OS=Litopenaeus vannamei PE=1 SV=3			K11251//histone H2A+ko04217//Necroptosis+ko05322//Systemic lupus erythematosus+ko05034//Alcoholism;K11251//histone H2A+ko04217//Necroptosis+ko05322//Systemic lupus erythematosus+ko05034//Alcoholism;K11251//histone H2A+ko04217//Necroptosis+ko05322//Systemic lupus erythematosus+ko05034//Alcoholism;K11251//histone H2A+ko04217//Necroptosis+ko05322//Systemic lupus erythematosus+ko05034//Alcoholism;K11…
CL584.Contig5_All	ko05034//Alcoholism;ko04217//Necroptosis;ko05322//Systemic lupus erythematosus	Immune diseases;Substance dependence;Cell growth and death	Human Diseases;Cellular Processes	Novel_gene	439	36.18	25.67	23.45	5.09	1.36	3.29	-3.09119	5.99314e-164	6.73578e-165	XM_014625655.1 PREDICTED: Dinoponera quadriceps histone H2A-like (LOC106747771), mRNA	histone H2A-like [Athalia rosae]	C-terminus of histone H2A	[B] KOG1756 Histone 2A	Histone H2A OS=Litopenaeus vannamei PE=1 SV=3	GO:0035267//NuA4 histone acetyltransferase complex;GO:0003677//DNA binding;GO:0071168//protein localization to chromatin;GO:0046982//protein heterodimerization activity;GO:0035019//somatic stem cell population maintenance;GO:0035861//site of double-strand break;GO:0005701//polytene chromosome chromocenter;GO:0006974//cellular response to DNA damage stimulus;GO:0000786//nucleosome;GO:0036098//male…		K11251//histone H2A+ko04217//Necroptosis+ko05322//Systemic lupus erythematosus+ko05034//Alcoholism;K11251//histone H2A+ko04217//Necroptosis+ko05322//Systemic lupus erythematosus+ko05034//Alcoholism;K11251//histone H2A+ko04217//Necroptosis+ko05322//Systemic lupus erythematosus+ko05034//Alcoholism;K11251//histone H2A+ko04217//Necroptosis+ko05322//Systemic lupus erythematosus+ko05034//Alcoholism;K11…
CL591.Contig1_All	ko04925//Aldosterone synthesis and secretion	Endocrine system	Organismal Systems	Novel_gene	483	7.24	10.18	9.11	2.9	1.56	4.26	-1.58587	7.51354e-27	4.02383e-27		uncharacterized protein LOC100575004 precursor [Acyrthosiphon pisum] >BAH72024.1 ACYPI27259 [Acyrthosiphon pisum]						K04919//potassium channel subfamily K member 9+ko04925//Aldosterone synthesis and secretion
CL597.Contig1_All	ko05034//Alcoholism;ko05322//Systemic lupus erythematosus;ko05203//Viral carcinogenesis	Immune diseases;Cancers: Overview;Substance dependence	Human Diseases	Novel_gene	368	9.57	11.07	7.95	2.25	2.66	4.06	-1.65433	4.5004e-22	2.74574e-22	X72803.1 C.thummi genes for histones H1, H2A, H3 and H4	PREDICTED: uncharacterized protein LOC109401799 [Aedes albopictus]	Centromere kinetochore component CENP-T histone fold	[B] KOG3467 Histone H4	Histone H4 OS=Acrolepiopsis assectella GN=His4 PE=3 SV=2	GO:0003677//DNA binding;GO:0005634//nucleus;GO:0006334//nucleosome assembly;GO:0046982//protein heterodimerization activity;GO:0006352//DNA-templated transcription, initiation;GO:0000786//nucleosome		K11254//histone H4+ko05322//Systemic lupus erythematosus+ko05034//Alcoholism+ko05203//Viral carcinogenesis;K11254//histone H4+ko05322//Systemic lupus erythematosus+ko05034//Alcoholism+ko05203//Viral carcinogenesis;K11254//histone H4+ko05322//Systemic lupus erythematosus+ko05034//Alcoholism+ko05203//Viral carcinogenesis;K11254//histone H4+ko05322//Systemic lupus erythematosus+ko05034//Alcoholism+k…
CL597.Contig3_All	ko05203//Viral carcinogenesis;ko05034//Alcoholism;ko05322//Systemic lupus erythematosus;ko05202//Transcriptional misregulation in cancer	Cancers: Overview;Substance dependence;Immune diseases	Human Diseases	Novel_gene	389	23.91	21.72	16.44	9.97	7.22	11.88	-1.07016	4.42957e-26	2.42086e-26	XM_006820513.1 PREDICTED: Saccoglossus kowalevskii histone H4-like (LOC100376586), mRNA	PREDICTED: uncharacterized protein LOC103519656 [Diaphorina citri]	Centromere kinetochore component CENP-T histone fold	[B] KOG3467 Histone H4	Histone H4 OS=Acrolepiopsis assectella GN=His4 PE=3 SV=2	GO:0003677//DNA binding;GO:0005634//nucleus;GO:0006334//nucleosome assembly;GO:0046982//protein heterodimerization activity;GO:0006352//DNA-templated transcription, initiation;GO:0000786//nucleosome		K11254//histone H4+ko05322//Systemic lupus erythematosus+ko05034//Alcoholism+ko05203//Viral carcinogenesis;K11254//histone H4+ko05322//Systemic lupus erythematosus+ko05034//Alcoholism+ko05203//Viral carcinogenesis;K11253//histone H3+ko05322//Systemic lupus erythematosus+ko05034//Alcoholism+ko05202//Transcriptional misregulation in cancer;K11254//histone H4+ko05322//Systemic lupus erythematosus+ko…
CL597.Contig5_All	ko05202//Transcriptional misregulation in cancer;ko05322//Systemic lupus erythematosus;ko05034//Alcoholism;ko05203//Viral carcinogenesis	Substance dependence;Cancers: Overview;Immune diseases	Human Diseases	Novel_gene	409	5.34	5.98	4.19	2.34	1.72	2.47	-1.22647	9.59534e-10	9.54528e-10	XM_014748150.1 PREDICTED: Polistes canadensis histone H4 (LOC106786594), mRNA	histone H4-like [Aedes aegypti]	Centromere kinetochore component CENP-T histone fold	[B] KOG3467 Histone H4	Histone H4 OS=Acrolepiopsis assectella GN=His4 PE=3 SV=2			K11254//histone H4+ko05322//Systemic lupus erythematosus+ko05034//Alcoholism+ko05203//Viral carcinogenesis;K11254//histone H4+ko05322//Systemic lupus erythematosus+ko05034//Alcoholism+ko05203//Viral carcinogenesis;K11253//histone H3+ko05322//Systemic lupus erythematosus+ko05034//Alcoholism+ko05202//Transcriptional misregulation in cancer;K11253//histone H3+ko05322//Systemic lupus erythematosus+ko…
CL615.Contig1_All	ko05170//Human immunodeficiency virus 1 infection;ko05145//Toxoplasmosis;ko04010//MAPK signaling pathway;ko05169//Epstein-Barr virus infection;ko05140//Leishmaniasis;ko05168//Herpes simplex infection;ko04380//Osteoclast differentiation;ko04668//TNF signaling pathway;ko04620//Toll-like receptor signaling pathway;ko04064//NF-kappa B signaling pathway;ko04621//NOD-like receptor signaling pathway;ko0…	Development;Signal transduction;Infectious diseases: Viral;Immune system;Infectious diseases: Parasitic	Organismal Systems;Human Diseases;Environmental Information Processing	Novel_gene	2429	8.62	6.78	6.02	3.87	2.36	3.56	-1.12152	6.29099e-73	1.52762e-73	XM_019910880.1 PREDICTED: Dendroctonus ponderosae ubiquitin-conjugating enzyme E2-17 kDa (LOC109541883), mRNA	PREDICTED: TGF-beta-activated kinase 1 and MAP3K7-binding protein 1-like [Cephus cinctus]	Ubiquitin-conjugating enzyme	[O] KOG0419 Ubiquitin-protein ligase	Ubiquitin-conjugating enzyme E2-17 kDa OS=Drosophila melanogaster GN=Ubc6 PE=2 SV=2	GO:0016301//kinase activity;GO:0004722//protein serine/threonine phosphatase activity	bHLH	K04403//TAK1-binding protein 1+ko05170//Human immunodeficiency virus 1 infection+ko04380//Osteoclast differentiation+ko04668//TNF signaling pathway+ko05145//Toxoplasmosis+ko05140//Leishmaniasis+ko04621//NOD-like receptor signaling pathway+ko04620//Toll-like receptor signaling pathway+ko04010//MAPK signaling pathway+ko04064//NF-kappa B signaling pathway+ko05161//Hepatitis B+ko05169//Epstein-Barr v…
CL629.Contig4_All	ko01100//Metabolic pathways;ko00520//Amino sugar and nucleotide sugar metabolism	Carbohydrate metabolism;Global and overview maps	Metabolism	Novel_gene	1072	7.42	5.8	13.26	6.48	4.23	1.98	-1.03929	3.05374e-34	1.37551e-34		PREDICTED: cell cycle control protein 50A isoform X2 [Polistes canadensis] >XP_014610834.1 PREDICTED: cell cycle control protein 50A isoform X2 [Polistes canadensis]	LEM3 (ligand-effect modulator 3) family / CDC50 family	[DKT] KOG2952 Cell cycle control protein	Cell cycle control protein 50A OS=Bos taurus GN=TMEM30A PE=1 SV=1			K00972//UDP-N-acetylglucosamine/UDP-N-acetylgalactosamine diphosphorylase [EC:2.7.7.23 2.7.7.83]+ko00520//Amino sugar and nucleotide sugar metabolism+ko01100//Metabolic pathways
CL636.Contig2_All	ko00053//Ascorbate and aldarate metabolism;ko00830//Retinol metabolism;ko00040//Pentose and glucuronate interconversions;ko00980//Metabolism of xenobiotics by cytochrome P450;ko00860//Porphyrin and chlorophyll metabolism;ko00140//Steroid hormone biosynthesis;ko00983//Drug metabolism - other enzymes;ko01100//Metabolic pathways;ko00982//Drug metabolism - cytochrome P450;ko05204//Chemical carcinogen…	Cancers: Overview;Xenobiotics biodegradation and metabolism;Carbohydrate metabolism;Metabolism of cofactors and vitamins;Lipid metabolism;Global and overview maps	Human Diseases;Metabolism	Novel_gene	777	2.61	3.15	3.38	1.04	1.36	1.33	-1.28904	9.2107e-13	7.94382e-13		2-hydroxyacylsphingosine 1-beta-galactosyltransferase [Zootermopsis nevadensis]	UDP-glucoronosyl and UDP-glucosyl transferase	[GC] KOG1192 UDP-glucuronosyl and UDP-glucosyl transferase	UDP-glucuronosyltransferase 3A2 OS=Homo sapiens GN=UGT3A2 PE=2 SV=1			K00699//glucuronosyltransferase [EC:2.4.1.17]+ko00980//Metabolism of xenobiotics by cytochrome P450+ko00982//Drug metabolism - cytochrome P450+ko00983//Drug metabolism - other enzymes+ko00040//Pentose and glucuronate interconversions+ko00860//Porphyrin and chlorophyll metabolism+ko00053//Ascorbate and aldarate metabolism+ko00830//Retinol metabolism+ko05204//Chemical carcinogenesis+ko00140//Steroi…
CL637.Contig13_All	ko04640//Hematopoietic cell lineage;ko00480//Glutathione metabolism;ko01100//Metabolic pathways;ko04614//Renin-angiotensin system	Global and overview maps;Immune system;Endocrine system;Metabolism of other amino acids	Organismal Systems;Metabolism	Novel_gene	2678	29.46	30.01	37.58	10.07	20.74	12.81	-1.15955	0	0		PREDICTED: uncharacterized protein LOC107272255 [Cephus cinctus] >XP_015604736.1 PREDICTED: uncharacterized protein LOC107272255 [Cephus cinctus]	Peptidase family M1	[EO] KOG1046 Puromycin-sensitive aminopeptidase and related aminopeptidases	Aminopeptidase Ey OS=Gallus gallus GN=ANPEP PE=1 SV=2	GO:0008237//metallopeptidase activity;GO:0004177//aminopeptidase activity;GO:0008270//zinc ion binding;GO:0016021//integral component of membrane		K11140//aminopeptidase N [EC:3.4.11.2]+ko04640//Hematopoietic cell lineage+ko04614//Renin-angiotensin system+ko00480//Glutathione metabolism+ko01100//Metabolic pathways;K11140//aminopeptidase N [EC:3.4.11.2]+ko04640//Hematopoietic cell lineage+ko04614//Renin-angiotensin system+ko00480//Glutathione metabolism+ko01100//Metabolic pathways;K11140//aminopeptidase N [EC:3.4.11.2]+ko04640//Hematopoietic…
CL662.Contig1_All	ko05165//Human papillomavirus infection;ko04152//AMPK signaling pathway;ko04151//PI3K-Akt signaling pathway;ko04728//Dopaminergic synapse;ko04071//Sphingolipid signaling pathway;ko03015//mRNA surveillance pathway;ko04114//Oocyte meiosis;ko04261//Adrenergic signaling in cardiomyocytes	Nervous system;Infectious diseases: Viral;Translation;Cell growth and death;Circulatory system;Signal transduction	Human Diseases;Organismal Systems;Cellular Processes;Environmental Information Processing;Genetic Information Processing	Novel_gene	4609	9.95	11.44	12.52	4.15	1.78	4.46	-1.69857	0	0	XM_623649.4 PREDICTED: Apis mellifera serine/threonine-protein phosphatase 2A 56 kDa regulatory subunit epsilon isoform (LOC551258), transcript variant X1, mRNA	PREDICTED: serine/threonine-protein phosphatase 2A 56 kDa regulatory subunit epsilon isoform [Plutella xylostella]	Protein phosphatase 2A regulatory B subunit (B56 family)	[T] KOG2085 Serine/threonine protein phosphatase 2A, regulatory subunit	Serine/threonine-protein phosphatase 2A 56 kDa regulatory subunit alpha isoform OS=Mus musculus GN=Ppp2r5a PE=1 SV=1	GO:0007165//signal transduction;GO:0019888//protein phosphatase regulator activity;GO:0000159//protein phosphatase type 2A complex		K11584//serine/threonine-protein phosphatase 2A regulatory subunit B'+ko04071//Sphingolipid signaling pathway+ko04728//Dopaminergic synapse+ko04261//Adrenergic signaling in cardiomyocytes+ko03015//mRNA surveillance pathway+ko04152//AMPK signaling pathway+ko04151//PI3K-Akt signaling pathway+ko04114//Oocyte meiosis+ko05165//Human papillomavirus infection;K11584//serine/threonine-protein phosphatase…
CL67.Contig2_All	ko04714//Thermogenesis;ko05225//Hepatocellular carcinoma	Cancers: Specific types;Environmental adaptation	Human Diseases;Organismal Systems	Novel_gene	2975	40.73	25.24	28.74	10.06	12.95	11.96	-1.43833	0	0	XM_012367624.1 PREDICTED: Linepithema humile SWI/SNF complex subunit SMARCC2 (LOC105672586), mRNA	SWI/SNF complex subunit SMARCC2 isoform X1 [Nilaparvata lugens] >XP_022186906.1 SWI/SNF complex subunit SMARCC2 isoform X3 [Nilaparvata lugens]	SWIRM-associated domain at the N-terminal	[B] KOG1279 Chromatin remodeling factor subunit and related transcription factors	SWI/SNF complex subunit SMARCC2 OS=Mus musculus GN=Smarcc2 PE=1 SV=2		MYB	K11649//SWI/SNF related-matrix-associated actin-dependent regulator of chromatin subfamily C+ko05225//Hepatocellular carcinoma+ko04714//Thermogenesis;K11649//SWI/SNF related-matrix-associated actin-dependent regulator of chromatin subfamily C+ko05225//Hepatocellular carcinoma+ko04714//Thermogenesis;K11649//SWI/SNF related-matrix-associated actin-dependent regulator of chromatin subfamily C+ko0522…
CL67.Contig6_All	ko05161//Hepatitis B;ko04310//Wnt signaling pathway;ko05164//Influenza A;ko05206//MicroRNAs in cancer;ko04520//Adherens junction;ko05016//Huntington disease;ko04720//Long-term potentiation;ko05167//Kaposi sarcoma-associated herpesvirus infection;ko05152//Tuberculosis;ko04068//FoxO signaling pathway;ko05211//Renal cell carcinoma;ko05168//Herpes simplex infection;ko04630//Jak-STAT signaling pathway…	Cancers: Overview;Nervous system;Neurodegenerative diseases;Cancers: Specific types;Cellular community - eukaryotes;Signal transduction;Cell growth and death;Infectious diseases: Bacterial;Infectious diseases: Viral;Endocrine system	Organismal Systems;Environmental Information Processing;Human Diseases;Cellular Processes	Novel_gene	2322	8.08	6.21	6.63	3.79	2.64	2.1	-1.28284	8.31123e-84	1.79866e-84		PREDICTED: CREB-binding protein isoform X4 [Tribolium castaneum]	TAZ zinc finger	[K] KOG1778 CREB binding protein/P300 and related TAZ Zn-finger proteins	CREB-binding protein OS=Mus musculus GN=Crebbp PE=1 SV=3			K04498//E1A/CREB-binding protein [EC:2.3.1.48]+ko04024//cAMP signaling pathway+ko04630//Jak-STAT signaling pathway+ko04350//TGF-beta signaling pathway+ko04919//Thyroid hormone signaling pathway+ko04916//Melanogenesis+ko04310//Wnt signaling pathway+ko04720//Long-term potentiation+ko05215//Prostate cancer+ko05211//Renal cell carcinoma+ko05200//Pathways in cancer+ko05203//Viral carcinogenesis+ko0520…
CL672.Contig3_All	ko01230//Biosynthesis of amino acids;ko00920//Sulfur metabolism;ko01100//Metabolic pathways;ko00270//Cysteine and methionine metabolism;ko01200//Carbon metabolism	Energy metabolism;Global and overview maps;Amino acid metabolism	Metabolism	Novel_gene	1677	17.27	63.36	16.97	21.19	5.04	18.29	-1.11931	6.06305e-222	5.00202e-223		cysteine synthase [Planococcus citri] >AGR65735.1 cysteine synthase [Planococcus citri]	Pyridoxal-phosphate dependent enzyme	[E] KOG1252 Cystathionine beta-synthase and related enzymes	Cysteine synthase 1 OS=Caenorhabditis elegans GN=cysl-1 PE=1 SV=2			K01738//cysteine synthase [EC:2.5.1.47]+ko01200//Carbon metabolism+ko01230//Biosynthesis of amino acids+ko00920//Sulfur metabolism+ko01100//Metabolic pathways+ko00270//Cysteine and methionine metabolism;K01738//cysteine synthase [EC:2.5.1.47]+ko01200//Carbon metabolism+ko01230//Biosynthesis of amino acids+ko00920//Sulfur metabolism+ko01100//Metabolic pathways+ko00270//Cysteine and methionine meta…
CL712.Contig3_All	ko04145//Phagosome;ko04976//Bile secretion;ko05160//Hepatitis C;ko04913//Ovarian steroidogenesis;ko04934//Cushing syndrome;ko04977//Vitamin digestion and absorption;ko04975//Fat digestion and absorption;ko04979//Cholesterol metabolism;ko04925//Aldosterone synthesis and secretion;ko04927//Cortisol synthesis and secretion	Digestive system;Infectious diseases: Viral;Transport and catabolism;Endocrine system;Endocrine and metabolic diseases	Human Diseases;Organismal Systems;Cellular Processes	Novel_gene	2114	2.39	3.81	6.23	1.69	1.29	1.86	-1.35283	1.30721e-49	4.4019e-50		PREDICTED: protein croquemort-like [Cimex lectularius]	CD36 family	[T] KOG3776 Plasma membrane glycoprotein CD36 and related membrane receptors	Protein croquemort OS=Drosophila melanogaster GN=crq PE=1 SV=3	GO:0016021//integral component of membrane		K13885//scavenger receptor class B, member 1+ko04145//Phagosome+ko04913//Ovarian steroidogenesis+ko04979//Cholesterol metabolism+ko04975//Fat digestion and absorption+ko04977//Vitamin digestion and absorption+ko04976//Bile secretion+ko04934//Cushing syndrome+ko04927//Cortisol synthesis and secretion+ko04925//Aldosterone synthesis and secretion+ko05160//Hepatitis C;K13885//scavenger receptor class…
CL731.Contig2_All	ko00562//Inositol phosphate metabolism;ko04933//AGE-RAGE signaling pathway in diabetic complications;ko05146//Amoebiasis;ko03022//Basal transcription factors;ko04974//Protein digestion and absorption;ko04926//Relaxin signaling pathway;ko04070//Phosphatidylinositol signaling system;ko04611//Platelet activation;ko01100//Metabolic pathways;ko05202//Transcriptional misregulation in cancer	Endocrine and metabolic diseases;Infectious diseases: Parasitic;Global and overview maps;Cancers: Overview;Carbohydrate metabolism;Digestive system;Endocrine system;Transcription;Immune system;Signal transduction	Human Diseases;Metabolism;Organismal Systems;Environmental Information Processing;Genetic Information Processing	Novel_gene	1286	353.13	309.09	223.92	24.96	27.37	41.57	-3.23799	0	0		hypothetical protein AM593_00260, partial [Mytilus galloprovincialis]	Protein of unknown function (DUF4243)	[R] KOG1995 Conserved Zn-finger protein	Acanthoscurrin-2 (Fragment) OS=Acanthoscurria gomesiana GN=acantho2 PE=1 SV=1		bHLH	K13184//ATP-dependent RNA helicase A [EC:3.6.4.13];K19720//collagen, type III, alpha+ko04933//AGE-RAGE signaling pathway in diabetic complications+ko04611//Platelet activation+ko05146//Amoebiasis+ko04974//Protein digestion and absorption+ko04926//Relaxin signaling pathway;K10572//inositol-pentakisphosphate 2-kinase [EC:2.7.1.158]+ko04070//Phosphatidylinositol signaling system+ko00562//Inositol ph…
CL762.Contig6_All	ko05146//Amoebiasis	Infectious diseases: Parasitic	Human Diseases	Novel_gene	1890	55.04	27.81	8.91	9.3	16.79	14.53	-1.18291	6.21036e-258	4.49576e-259		serine protease inhibitor-like protein, partial [Maconellicoccus hirsutus]	Serpin (serine protease inhibitor)	[V] KOG2392 Serpin	Serpin B4 OS=Homo sapiens GN=SERPINB4 PE=1 SV=2	GO:0005615//extracellular space;GO:0004867//serine-type endopeptidase inhibitor activity		K13963//serpin B+ko05146//Amoebiasis;K13963//serpin B+ko05146//Amoebiasis;K13963//serpin B+ko05146//Amoebiasis;K13963//serpin B+ko05146//Amoebiasis
CL768.Contig11_All	ko04310//Wnt signaling pathway	Signal transduction	Environmental Information Processing	Novel_gene	3562	6.03	5.19	6.06	1.12	5.41	1.64	-1.09643	6.80774e-84	1.47033e-84	XM_018549424.1 PREDICTED: Cyphomyrmex costatus FACT complex subunit spt16 (LOC108781462), mRNA	PREDICTED: FACT complex subunit spt16 isoform X2 [Diuraphis noxia]	FACT complex subunit SPT16 N-terminal lobe domain	[E] KOG1189 Global transcriptional regulator, cell division control protein	FACT complex subunit spt16 OS=Drosophila melanogaster GN=dre4 PE=1 SV=2		HSF	K04494//chromodomain helicase DNA binding protein 8 [EC:3.6.4.12]+ko04310//Wnt signaling pathway;K04494//chromodomain helicase DNA binding protein 8 [EC:3.6.4.12]+ko04310//Wnt signaling pathway;K17552//protein phosphatase 1 regulatory subunit 10;K17552//protein phosphatase 1 regulatory subunit 10;K03163//DNA topoisomerase I [EC:5.99.1.2]
CL774.Contig7_All	ko04974//Protein digestion and absorption	Digestive system	Organismal Systems	Novel_gene	2932	4.74	4.25	4.61	2.77	2.58	1.39	-1.00724	8.88228e-48	3.08949e-48	CU571256.4 Zebrafish DNA sequence from clone CH73-41K6 in linkage group 19, complete sequence	Y+L amino acid transporter 2 isoform X1 [Zootermopsis nevadensis]	Amino acid permease	[E] KOG1287 Amino acid transporters	Large neutral amino acids transporter small subunit 2 OS=Oryctolagus cuniculus GN=SLC7A8 PE=1 SV=1			K03450//solute carrier family 7 (L-type amino acid transporter), other;K03450//solute carrier family 7 (L-type amino acid transporter), other;K13781//solute carrier family 7 (L-type amino acid transporter), member 8+ko04974//Protein digestion and absorption;K13781//solute carrier family 7 (L-type amino acid transporter), member 8+ko04974//Protein digestion and absorption
CL790.Contig3_All	ko04510//Focal adhesion;ko04810//Regulation of actin cytoskeleton;ko05131//Shigellosis;ko05100//Bacterial invasion of epithelial cells	Cell motility;Infectious diseases: Bacterial;Cellular community - eukaryotes	Cellular Processes;Human Diseases	Novel_gene	3409	10.76	8.12	6.56	2.15	4.45	4.53	-1.20047	1.37678e-135	1.88858e-136		PREDICTED: dedicator of cytokinesis protein 1 isoform X4 [Bemisia tabaci]	Dock homology region 2	[T] KOG1998 Signaling protein DOCK180	Dedicator of cytokinesis protein 2 OS=Homo sapiens GN=DOCK2 PE=1 SV=2			K13708//dedicator of cytokinesis protein 1+ko05131//Shigellosis+ko04810//Regulation of actin cytoskeleton+ko04510//Focal adhesion+ko05100//Bacterial invasion of epithelial cells;K13708//dedicator of cytokinesis protein 1+ko05131//Shigellosis+ko04810//Regulation of actin cytoskeleton+ko04510//Focal adhesion+ko05100//Bacterial invasion of epithelial cells;K13708//dedicator of cytokinesis protein 1+…
CL803.Contig5_All	ko05130//Pathogenic Escherichia coli infection;ko04540//Gap junction;ko04145//Phagosome	Cellular community - eukaryotes;Infectious diseases: Bacterial;Transport and catabolism	Human Diseases;Cellular Processes	Novel_gene	1872	112.13	147.19	130.7	93.62	20.49	59.53	-1.14642	0	0	EF070480.1 Maconellicoccus hirsutus clone WHMH3621 putative tubulin beta-1 chain mRNA, complete cds	PREDICTED: tubulin beta-4B chain isoform X1 [Orycteropus afer afer]	Tubulin/FtsZ family, GTPase domain	[Z] KOG1375 Beta tubulin	Tubulin beta-3 chain OS=Bos taurus GN=TUBB3 PE=1 SV=1			K07375//tubulin beta+ko04145//Phagosome+ko05130//Pathogenic Escherichia coli infection+ko04540//Gap junction;K07375//tubulin beta+ko04145//Phagosome+ko05130//Pathogenic Escherichia coli infection+ko04540//Gap junction;K07375//tubulin beta+ko04145//Phagosome+ko05130//Pathogenic Escherichia coli infection+ko04540//Gap junction;K07375//tubulin beta+ko04145//Phagosome+ko05130//Pathogenic Escherichia …
CL850.Contig9_All	ko03013//RNA transport;ko03015//mRNA surveillance pathway;ko04144//Endocytosis;ko00310//Lysine degradation;ko04911//Insulin secretion	Endocrine system;Amino acid metabolism;Transport and catabolism;Translation	Genetic Information Processing;Metabolism;Cellular Processes;Organismal Systems	Novel_gene	2210	13.93	15.28	16.89	6.92	2.91	7.93	-1.3663	3.82489e-191	3.69185e-192		PREDICTED: uncharacterized protein LOC109034133 isoform X1 [Bemisia tabaci]	RibD C-terminal domain	[T] KOG1187 Serine/threonine protein kinase	Protein enabled homolog OS=Mus musculus GN=Enah PE=1 SV=2			K13171//serine/arginine repetitive matrix protein 1+ko03013//RNA transport+ko03015//mRNA surveillance pathway;K19475//WAS/WASL-interacting protein+ko04144//Endocytosis;K09189//histone-lysine N-methyltransferase MLL5 [EC:2.1.1.43]+ko00310//Lysine degradation;K13171//serine/arginine repetitive matrix protein 1+ko03013//RNA transport+ko03015//mRNA surveillance pathway;K16882//protein piccolo+ko04911…
CL869.Contig2_All	ko04310//Wnt signaling pathway	Signal transduction	Environmental Information Processing	Novel_gene	1444	4.99	3.7	4.7	1.33	1.93	1.35	-1.5336	2.27822e-43	8.54829e-44		protein shifted isoform X2 [Zootermopsis nevadensis] >KDR22793.1 Protein shifted [Zootermopsis nevadensis]	WIF domain	[TW] KOG1225 Teneurin-1 and related extracellular matrix proteins, contain EGF-like repeats	Protein shifted OS=Drosophila melanogaster GN=shf PE=1 SV=2			K01691//WNT inhibitory factor 1+ko04310//Wnt signaling pathway;K01691//WNT inhibitory factor 1+ko04310//Wnt signaling pathway;K01691//WNT inhibitory factor 1+ko04310//Wnt signaling pathway;K01691//WNT inhibitory factor 1+ko04310//Wnt signaling pathway
CL871.Contig5_All	ko00450//Selenocompound metabolism;ko01230//Biosynthesis of amino acids;ko00260//Glycine, serine and threonine metabolism;ko01100//Metabolic pathways;ko00270//Cysteine and methionine metabolism	Metabolism of other amino acids;Amino acid metabolism;Global and overview maps	Metabolism	Novel_gene	1541	104.39	68.14	85.67	33.43	38.31	37.31	-1.24058	0	0	EF091988.1 Maconellicoccus hirsutus clone WHMH2910 cystathionine gamma-lyase-like protein mRNA, partial cds	cystathionine beta-lyase [Culex quinquefasciatus] >EDS38196.1 cystathionine beta-lyase [Culex quinquefasciatus]	Cys/Met metabolism PLP-dependent enzyme	[E] KOG0053 Cystathionine beta-lyases/cystathionine gamma-synthases	Cystathionine gamma-lyase OS=Sus scrofa GN=CTH PE=2 SV=1	GO:0004123//cystathionine gamma-lyase activity;GO:0019346//transsulfuration;GO:0071266//'de novo' L-methionine biosynthetic process;GO:0005737//cytoplasm;GO:0003962//cystathionine gamma-synthase activity;GO:0016829//lyase activity;GO:0019343//cysteine biosynthetic process via cystathionine;GO:0030170//pyridoxal phosphate binding		K01758//cystathionine gamma-lyase [EC:4.4.1.1]+ko01230//Biosynthesis of amino acids+ko00260//Glycine, serine and threonine metabolism+ko01100//Metabolic pathways+ko00450//Selenocompound metabolism+ko00270//Cysteine and methionine metabolism;K01758//cystathionine gamma-lyase [EC:4.4.1.1]+ko01230//Biosynthesis of amino acids+ko00260//Glycine, serine and threonine metabolism+ko01100//Metabolic pathw…
CL942.Contig5_All	ko04611//Platelet activation;ko05205//Proteoglycans in cancer;ko04022//cGMP-PKG signaling pathway;ko04510//Focal adhesion;ko04024//cAMP signaling pathway;ko04810//Regulation of actin cytoskeleton;ko04270//Vascular smooth muscle contraction;ko04921//Oxytocin signaling pathway	Cellular community - eukaryotes;Circulatory system;Cancers: Overview;Immune system;Cell motility;Endocrine system;Signal transduction	Human Diseases;Cellular Processes;Organismal Systems;Environmental Information Processing	Novel_gene	3529	24.6	23.55	26.65	9.77	8.47	15.05	-1.16773	0	0		PREDICTED: protein phosphatase 1 regulatory subunit 12A-like isoform X6 [Bemisia tabaci]	Ankyrin repeats (many copies)	[OT] KOG0505 Myosin phosphatase, regulatory subunit	Protein phosphatase 1 regulatory subunit 12A OS=Gallus gallus GN=PPP1R12A PE=1 SV=1		RHD	K06270//protein phosphatase 1 regulatory subunit 12A+ko04024//cAMP signaling pathway+ko04022//cGMP-PKG signaling pathway+ko04810//Regulation of actin cytoskeleton+ko04510//Focal adhesion+ko04611//Platelet activation+ko05205//Proteoglycans in cancer+ko04270//Vascular smooth muscle contraction+ko04921//Oxytocin signaling pathway;K06270//protein phosphatase 1 regulatory subunit 12A+ko04024//cAMP sig…
CL943.Contig1_All	ko05146//Amoebiasis	Infectious diseases: Parasitic	Human Diseases	Novel_gene	1466	21.62	12.81	15.86	4.92	6.49	5.08	-1.60667	2.91693e-172	3.12619e-173		serine protease inhibitor-like protein, partial [Maconellicoccus hirsutus]	Serpin (serine protease inhibitor)	[V] KOG2392 Serpin	Antithrombin-III OS=Homo sapiens GN=SERPINC1 PE=1 SV=1			K13963//serpin B+ko05146//Amoebiasis;K13963//serpin B+ko05146//Amoebiasis;K13963//serpin B+ko05146//Amoebiasis;K13963//serpin B+ko05146//Amoebiasis
CL943.Contig3_All	ko05146//Amoebiasis	Infectious diseases: Parasitic	Human Diseases	Novel_gene	1431	15.71	5.01	1.68	1.67	2.92	2	-1.76823	1.5787e-86	3.29812e-87		serine protease inhibitor-like protein, partial [Maconellicoccus hirsutus]	Serpin (serine protease inhibitor)	[V] KOG2392 Serpin	Glia-derived nexin OS=Rattus norvegicus GN=Serpine2 PE=1 SV=1	GO:0005615//extracellular space		K13963//serpin B+ko05146//Amoebiasis;K13963//serpin B+ko05146//Amoebiasis;K13963//serpin B+ko05146//Amoebiasis;K13963//serpin B+ko05146//Amoebiasis;K13963//serpin B+ko05146//Amoebiasis
CL943.Contig4_All	ko05146//Amoebiasis	Infectious diseases: Parasitic	Human Diseases	Novel_gene	1343	39.48	10.15	1.79	3.69	5.55	4.54	-1.90164	6.78226e-203	6.1409e-204		serine protease inhibitor-like protein, partial [Maconellicoccus hirsutus]	Serpin (serine protease inhibitor)	[V] KOG2392 Serpin	Serpin B4 OS=Homo sapiens GN=SERPINB4 PE=1 SV=2	GO:0005615//extracellular space;GO:0004867//serine-type endopeptidase inhibitor activity;GO:0060570//negative regulation of peptide hormone processing;GO:0004869//cysteine-type endopeptidase inhibitor activity		K13963//serpin B+ko05146//Amoebiasis;K13963//serpin B+ko05146//Amoebiasis;K13963//serpin B+ko05146//Amoebiasis;K13963//serpin B+ko05146//Amoebiasis;K13963//serpin B+ko05146//Amoebiasis
CL973.Contig7_All	ko00140//Steroid hormone biosynthesis	Lipid metabolism	Metabolism	Novel_gene	2334	120.96	41.76	43.97	37.14	34.24	11.14	-1.31438	0	0		PREDICTED: sulfotransferase 1C4-like [Nasonia vitripennis] >XP_008204338.1 PREDICTED: sulfotransferase 1C4-like [Nasonia vitripennis]	Sulfotransferase domain	[R] KOG1584 Sulfotransferase	Amine sulfotransferase OS=Oryctolagus cuniculus GN=SULT3A1 PE=1 SV=1			K01016//estrone sulfotransferase [EC:2.8.2.4]+ko00140//Steroid hormone biosynthesis;K01016//estrone sulfotransferase [EC:2.8.2.4]+ko00140//Steroid hormone biosynthesis;K01016//estrone sulfotransferase [EC:2.8.2.4]+ko00140//Steroid hormone biosynthesis;K01016//estrone sulfotransferase [EC:2.8.2.4]+ko00140//Steroid hormone biosynthesis
Unigene10505_All	ko04013//MAPK signaling pathway - fly	Signal transduction	Environmental Information Processing	Novel_gene	3940	6.18	5.15	7.63	2.63	3.02	3.01	-1.1315	6.97285e-107	1.19448e-107	LM703136.1 Protopolystoma xenopodis genome assembly P_xenopodis_South_Africa ,scaffold PXEA_contig0011070	kek1 [Culex quinquefasciatus] >EDS26165.1 kek1 [Culex quinquefasciatus]	Leucine rich repeat	[R] KOG0619 FOG: Leucine rich repeat	Leucine-rich repeat transmembrane neuronal protein 4 OS=Homo sapiens GN=LRRTM4 PE=2 SV=2	GO:0016021//integral component of membrane		K20230//kekkon-1+ko04013//MAPK signaling pathway - fly;K20230//kekkon-1+ko04013//MAPK signaling pathway - fly;K20230//kekkon-1+ko04013//MAPK signaling pathway - fly;K20230//kekkon-1+ko04013//MAPK signaling pathway - fly;K20230//kekkon-1+ko04013//MAPK signaling pathway - fly
Unigene10538_All	ko05034//Alcoholism;ko04217//Necroptosis;ko05322//Systemic lupus erythematosus	Cell growth and death;Immune diseases;Substance dependence	Cellular Processes;Human Diseases	Novel_gene	596	22.5	21.65	15.79	11	7.7	8.62	-1.11487	2.52721e-44	9.32869e-45	XM_002430874.1 Pediculus humanus corporis histone H2A, mRNA	histone H2A-like [Athalia rosae]	C-terminus of histone H2A	[B] KOG1756 Histone 2A	Histone H2A OS=Litopenaeus vannamei PE=1 SV=3	GO:0035267//NuA4 histone acetyltransferase complex;GO:0003677//DNA binding;GO:0071168//protein localization to chromatin;GO:0046982//protein heterodimerization activity;GO:0035019//somatic stem cell population maintenance;GO:0035861//site of double-strand break;GO:0005701//polytene chromosome chromocenter;GO:0006974//cellular response to DNA damage stimulus;GO:0000786//nucleosome;GO:0036098//male…		K11251//histone H2A+ko04217//Necroptosis+ko05322//Systemic lupus erythematosus+ko05034//Alcoholism;K11251//histone H2A+ko04217//Necroptosis+ko05322//Systemic lupus erythematosus+ko05034//Alcoholism;K11251//histone H2A+ko04217//Necroptosis+ko05322//Systemic lupus erythematosus+ko05034//Alcoholism;K11251//histone H2A+ko04217//Necroptosis+ko05322//Systemic lupus erythematosus+ko05034//Alcoholism;K11…
Unigene10628_All	ko01100//Metabolic pathways;ko04142//Lysosome;ko00500//Starch and sucrose metabolism;ko00052//Galactose metabolism	Carbohydrate metabolism;Global and overview maps;Transport and catabolism	Metabolism;Cellular Processes	Novel_gene	2270	10.45	3.25	3.51	1.66	3.82	2.31	-1.1501	3.41891e-57	1.01861e-57		alpha-glucosidase family 31, partial [Periplaneta americana]	Glycosyl hydrolases family 31	[G] KOG1065 Maltase glucoamylase and related hydrolases, glycosyl hydrolase family 31	Neutral alpha-glucosidase AB OS=Sus scrofa GN=GANAB PE=1 SV=1			K01187//alpha-glucosidase [EC:3.2.1.20]+ko00052//Galactose metabolism+ko00500//Starch and sucrose metabolism+ko01100//Metabolic pathways;K12316//lysosomal alpha-glucosidase [EC:3.2.1.20]+ko04142//Lysosome+ko00052//Galactose metabolism+ko00500//Starch and sucrose metabolism+ko01100//Metabolic pathways;K12316//lysosomal alpha-glucosidase [EC:3.2.1.20]+ko04142//Lysosome+ko00052//Galactose metabolism…
Unigene10684_All	ko04350//TGF-beta signaling pathway	Signal transduction	Environmental Information Processing	Novel_gene	1458	3.61	5.61	4.07	1.79	1.69	2.47	-1.15594	8.25123e-29	4.20365e-29		LOW QUALITY PROTEIN: follistatin [Zootermopsis nevadensis]	Kazal-type serine protease inhibitor domain	[R] KOG3649 FOG: Kazal-type serine protease inhibitor domain	Follistatin OS=Mus musculus GN=Fst PE=2 SV=1			K04661//follistatin+ko04350//TGF-beta signaling pathway;K04661//follistatin+ko04350//TGF-beta signaling pathway;K04661//follistatin+ko04350//TGF-beta signaling pathway;K04661//follistatin+ko04350//TGF-beta signaling pathway;K04661//follistatin+ko04350//TGF-beta signaling pathway
Unigene10747_All	ko00830//Retinol metabolism	Metabolism of cofactors and vitamins	Metabolism	Novel_gene	1249	5.09	3.23	2.76	1.44	1.19	1.46	-1.43266	2.01991e-28	1.03806e-28		short-chain dehydrogenase/reductase family 16C member 6-like isoform X3 [Myzus persicae]	short chain dehydrogenase	[Q] KOG1201 Hydroxysteroid 17-beta dehydrogenase 11	Retinol dehydrogenase 10 OS=Rattus norvegicus GN=Rdh10 PE=1 SV=1	GO:0016021//integral component of membrane;GO:0016491//oxidoreductase activity		K15734//all-trans-retinol dehydrogenase (NAD+) [EC:1.1.1.105]+ko00830//Retinol metabolism;K15734//all-trans-retinol dehydrogenase (NAD+) [EC:1.1.1.105]+ko00830//Retinol metabolism;K15734//all-trans-retinol dehydrogenase (NAD+) [EC:1.1.1.105]+ko00830//Retinol metabolism
Unigene10749_All	ko04142//Lysosome;ko04146//Peroxisome;ko00511//Other glycan degradation	Glycan biosynthesis and metabolism;Transport and catabolism	Cellular Processes;Metabolism	Novel_gene	1021	3.88	4.06	6.65	2.01	1.63	1.57	-1.47258	4.35554e-31	2.10439e-31		putative prophenoloxidase activating factor, partial [Maconellicoccus hirsutus]	Trypsin	[E] KOG3627 Trypsin	Ovochymase-2 OS=Rhinella arenarum GN=OVCH2 PE=2 SV=2	GO:0004252//serine-type endopeptidase activity		K01362//ovochymase [EC:3.4.21.-];K01362//ovochymase [EC:3.4.21.-];K12311//lysosomal alpha-mannosidase [EC:3.2.1.24]+ko04142//Lysosome+ko00511//Other glycan degradation;K13335//peroxin-16+ko04146//Peroxisome;K09640//transmembrane protease serine 9 [EC:3.4.21.-]
Unigene10783_All	ko01100//Metabolic pathways;ko00670//One carbon pool by folate	Metabolism of cofactors and vitamins;Global and overview maps	Metabolism	Novel_gene	1026	4.85	3.68	3.42	2.1	1.69	1.84	-1.07816	1.42248e-16	1.05279e-16		5-formyltetrahydrofolate cyclo-ligase-like isoform X1 [Limulus polyphemus]	5-formyltetrahydrofolate cyclo-ligase family	[H] KOG3093 5-formyltetrahydrofolate cyclo-ligase	5-formyltetrahydrofolate cyclo-ligase OS=Homo sapiens GN=MTHFS PE=1 SV=2			K01934//5-formyltetrahydrofolate cyclo-ligase [EC:6.3.3.2]+ko00670//One carbon pool by folate+ko01100//Metabolic pathways;K01934//5-formyltetrahydrofolate cyclo-ligase [EC:6.3.3.2]+ko00670//One carbon pool by folate+ko01100//Metabolic pathways;K01934//5-formyltetrahydrofolate cyclo-ligase [EC:6.3.3.2]+ko00670//One carbon pool by folate+ko01100//Metabolic pathways;K01934//5-formyltetrahydrofolate …
Unigene10809_All	ko04142//Lysosome;ko04979//Cholesterol metabolism	Transport and catabolism;Digestive system	Cellular Processes;Organismal Systems	Novel_gene	881	8.29	3.73	1.89	1.91	1.95	1.93	-1.25654	2.19156e-20	1.41427e-20		PREDICTED: protein NPC2 homolog [Tribolium castaneum] >EFA07578.1 Protein NPC2 homolog-like Protein [Tribolium castaneum]	ML domain	[S] KOG4063 Major epididymal secretory protein HE1	Protein NPC2 homolog OS=Drosophila melanogaster GN=Npc2a PE=2 SV=1	GO:0032367//intracellular cholesterol transport;GO:0005622//intracellular		K13443//Niemann-Pick C2 protein+ko04142//Lysosome+ko04979//Cholesterol metabolism;K13443//Niemann-Pick C2 protein+ko04142//Lysosome+ko04979//Cholesterol metabolism;K13443//Niemann-Pick C2 protein+ko04142//Lysosome+ko04979//Cholesterol metabolism;K13443//Niemann-Pick C2 protein+ko04142//Lysosome+ko04979//Cholesterol metabolism;K13443//Niemann-Pick C2 protein+ko04142//Lysosome+ko04979//Cholesterol …
Unigene10847_All	ko04640//Hematopoietic cell lineage;ko04310//Wnt signaling pathway;ko04512//ECM-receptor interaction;ko04611//Platelet activation	Signaling molecules and interaction;Immune system;Signal transduction	Organismal Systems;Environmental Information Processing	Novel_gene	2439	17.11	19.81	17.26	10.82	7.25	8.05	-1.04351	1.01598e-162	1.14851e-163		PREDICTED: uncharacterized protein LOC108738182 [Agrilus planipennis]	Leucine rich repeat	[R] KOG0619 FOG: Leucine rich repeat	Leucine-rich repeat-containing G-protein coupled receptor 6 OS=Homo sapiens GN=LGR6 PE=1 SV=3	GO:0016021//integral component of membrane		K17256//insulin-like growth factor-binding protein complex acid labile subunit;K17256//insulin-like growth factor-binding protein complex acid labile subunit;K08399//leucine-rich repeat-containing G protein-coupled receptor 6+ko04310//Wnt signaling pathway;K06260//platelet glycoprotein V+ko04640//Hematopoietic cell lineage+ko04512//ECM-receptor interaction+ko04611//Platelet activation
Unigene10857_All	ko00981//Insect hormone biosynthesis	Metabolism of terpenoids and polyketides	Metabolism	Novel_gene	803	16.65	17.5	13.44	3.73	3.97	3.34	-2.09975	4.03671e-122	6.06385e-123		PREDICTED: ninjurin-1-like [Diuraphis noxia]	Ninjurin	[R] TWOG0556 Ninjurin, nerve injury-induced protein	Ninjurin-2 OS=Rattus norvegicus GN=Ninj2 PE=2 SV=1	GO:0007155//cell adhesion;GO:0016021//integral component of membrane;GO:0042246//tissue regeneration		K14939//cytochrome P450 family 307 subfamily A+ko00981//Insect hormone biosynthesis
Unigene10978_All	ko05166//Human T-cell leukemia virus 1 infection;ko05200//Pathways in cancer;ko04919//Thyroid hormone signaling pathway;ko05164//Influenza A;ko04630//Jak-STAT signaling pathway;ko05203//Viral carcinogenesis;ko04310//Wnt signaling pathway;ko04330//Notch signaling pathway;ko04068//FoxO signaling pathway;ko05152//Tuberculosis;ko04916//Melanogenesis;ko04024//cAMP signaling pathway;ko05206//MicroRNAs …	Cancers: Specific types;Nervous system;Infectious diseases: Viral;Signal transduction;Infectious diseases: Bacterial;Cancers: Overview;Endocrine system;Neurodegenerative diseases;Cell growth and death;Cellular community - eukaryotes	Organismal Systems;Human Diseases;Cellular Processes;Environmental Information Processing	Novel_gene	551	10.13	8.81	7.9	3.72	3.35	4.25	-1.23078	5.01338e-22	3.0647e-22		PREDICTED: CREB-binding protein isoform X1 [Dinoponera quadriceps]	TAZ zinc finger	[K] KOG1778 CREB binding protein/P300 and related TAZ Zn-finger proteins	Histone acetyltransferase p300 OS=Homo sapiens GN=EP300 PE=1 SV=2			K04498//E1A/CREB-binding protein [EC:2.3.1.48]+ko04024//cAMP signaling pathway+ko04630//Jak-STAT signaling pathway+ko04350//TGF-beta signaling pathway+ko04919//Thyroid hormone signaling pathway+ko04916//Melanogenesis+ko04310//Wnt signaling pathway+ko04720//Long-term potentiation+ko05215//Prostate cancer+ko05211//Renal cell carcinoma+ko05200//Pathways in cancer+ko05203//Viral carcinogenesis+ko0520…
Unigene11145_All	ko05152//Tuberculosis;ko04145//Phagosome	Infectious diseases: Bacterial;Transport and catabolism	Human Diseases;Cellular Processes	Novel_gene	2919	24.8	29.47	22.79	10.62	12.86	15.07	-1.00202	5.90116e-260	4.22061e-261		PREDICTED: uncharacterized protein LOC109473213 [Branchiostoma belcheri]	Farnesoic acid 0-methyl transferase	[T] KOG3645 Acetylcholine receptor				K06560//mannose receptor, C type+ko04145//Phagosome+ko05152//Tuberculosis;K06560//mannose receptor, C type+ko04145//Phagosome+ko05152//Tuberculosis;K06560//mannose receptor, C type+ko04145//Phagosome+ko05152//Tuberculosis;K06560//mannose receptor, C type+ko04145//Phagosome+ko05152//Tuberculosis
Unigene11195_All	ko04142//Lysosome;ko04612//Antigen processing and presentation	Immune system;Transport and catabolism	Cellular Processes;Organismal Systems	Novel_gene	1887	67.98	78.62	45.63	23.61	22.73	22.29	-1.48307	0	0	XM_018113540.1 PREDICTED: Drosophila navojoa serine proteinase stubble (LOC108660214), transcript variant X4, mRNA	legumain-protease-precursor [Platynereis dumerilii]	Peptidase C13 family	[O] KOG1348 Asparaginyl peptidases	Legumain OS=Bos taurus GN=LGMN PE=1 SV=1	GO:0008233//peptidase activity		K01369//legumain [EC:3.4.22.34]+ko04142//Lysosome+ko04612//Antigen processing and presentation;K01369//legumain [EC:3.4.22.34]+ko04142//Lysosome+ko04612//Antigen processing and presentation;K01369//legumain [EC:3.4.22.34]+ko04142//Lysosome+ko04612//Antigen processing and presentation
Unigene1137_All	ko00270//Cysteine and methionine metabolism;ko01100//Metabolic pathways;ko00630//Glyoxylate and dicarboxylate metabolism;ko01200//Carbon metabolism;ko00020//Citrate cycle (TCA cycle);ko00620//Pyruvate metabolism	Global and overview maps;Carbohydrate metabolism;Amino acid metabolism	Metabolism	Novel_gene	1556	41.69	36.34	36.02	9.71	7.17	5.64	-2.32911	0	0	LM559567.1 Onchocerca flexuosa genome assembly O_flexuosa_Cordoba ,scaffold OFLC_contig0017735	PREDICTED: malate dehydrogenase, mitochondrial [Diachasma alloeum]		[C] KOG1494 NAD-dependent malate dehydrogenase				K00026//malate dehydrogenase [EC:1.1.1.37]+ko01200//Carbon metabolism+ko00020//Citrate cycle (TCA cycle)+ko00620//Pyruvate metabolism+ko01100//Metabolic pathways+ko00270//Cysteine and methionine metabolism+ko00630//Glyoxylate and dicarboxylate metabolism;K00026//malate dehydrogenase [EC:1.1.1.37]+ko01200//Carbon metabolism+ko00020//Citrate cycle (TCA cycle)+ko00620//Pyruvate metabolism+ko01100//M…
Unigene11766_All	ko01100//Metabolic pathways;ko00053//Ascorbate and aldarate metabolism	Carbohydrate metabolism;Global and overview maps	Metabolism	Novel_gene	1993	6.3	8.18	10.37	3.72	3.65	3.22	-1.22576	4.4044e-79	1.00248e-79		laccase-1-like isoform X2 [Zootermopsis nevadensis] >KDR11749.1 Laccase-4 [Zootermopsis nevadensis]	Multicopper oxidase	[Q] KOG1263 Multicopper oxidases				K19791//iron transport multicopper oxidase;K00423//L-ascorbate oxidase [EC:1.10.3.3]+ko00053//Ascorbate and aldarate metabolism+ko01100//Metabolic pathways;K19791//iron transport multicopper oxidase;K00423//L-ascorbate oxidase [EC:1.10.3.3]+ko00053//Ascorbate and aldarate metabolism+ko01100//Metabolic pathways;K00423//L-ascorbate oxidase [EC:1.10.3.3]+ko00053//Ascorbate and aldarate metabolism+ko…
Unigene11804_All	ko04210//Apoptosis;ko04142//Lysosome	Cell growth and death;Transport and catabolism	Cellular Processes	Novel_gene	1609	6.1	9.91	13.69	1.76	4.49	2.58	-1.75688	7.31149e-128	1.04904e-128		hypothetical protein EH28_21119 [Larimichthys crocea]	Polyhydroxyalkanoic acid inclusion protein (PhaP_Bmeg)		Vitellogenin-1 OS=Fundulus heteroclitus GN=vtg1 PE=1 SV=2			K01373//cathepsin F [EC:3.4.22.41]+ko04142//Lysosome+ko04210//Apoptosis
Unigene11847_All	ko00030//Pentose phosphate pathway	Carbohydrate metabolism	Metabolism	Novel_gene	1403	8.35	5.29	5.94	3.09	3.38	2.96	-1.04902	1.94792e-34	8.72967e-35		ribokinase-like [Mizuhopecten yessoensis] >OWF53132.1 Ribokinase [Mizuhopecten yessoensis]	pfkB family carbohydrate kinase	[G] KOG2855 Ribokinase	Ribokinase OS=Homo sapiens GN=RBKS PE=1 SV=1	GO:0070062//extracellular exosome;GO:0046872//metal ion binding;GO:0005634//nucleus;GO:0019303//D-ribose catabolic process;GO:0005524//ATP binding;GO:0004747//ribokinase activity;GO:0005737//cytoplasm		K00852//ribokinase [EC:2.7.1.15]+ko00030//Pentose phosphate pathway;K00852//ribokinase [EC:2.7.1.15]+ko00030//Pentose phosphate pathway;K00852//ribokinase [EC:2.7.1.15]+ko00030//Pentose phosphate pathway;K00852//ribokinase [EC:2.7.1.15]+ko00030//Pentose phosphate pathway
Unigene12300_All	ko04514//Cell adhesion molecules (CAMs);ko04360//Axon guidance	Development;Signaling molecules and interaction	Organismal Systems;Environmental Information Processing	Novel_gene	1066	7.19	6.99	1.91	1.18	1.22	1.43	-2.06733	2.22814e-56	6.71108e-57		PREDICTED: protein amalgam [Nicrophorus vespilloides]	Immunoglobulin I-set domain	[T] KOG3510 FOG: Immunoglobulin C-2 Type/fibronectin type III domains	Down syndrome cell adhesion molecule-like protein 1 homolog OS=Gallus gallus GN=DSCAML1 PE=1 SV=2			K17341//hemicentin;K06772//limbic system-associated membrane protein;K06773//opioid binding protein/cell adhesion molecule-like;K06550//L1 cell adhesion molecule+ko04360//Axon guidance+ko04514//Cell adhesion molecules (CAMs)
Unigene1314_All	ko00981//Insect hormone biosynthesis	Metabolism of terpenoids and polyketides	Metabolism	Novel_gene	706	16.42	4.29	1.31	1.52	1.52	3.24	-1.80619	4.27649e-41	1.66969e-41		PREDICTED: ninjurin-1 isoform X1 [Ooceraea biroi] >EZA51168.1 Ninjurin-1 [Ooceraea biroi]	Ninjurin	[R] TWOG0556 Ninjurin, nerve injury-induced protein	Ninjurin-2 OS=Rattus norvegicus GN=Ninj2 PE=2 SV=1			K14939//cytochrome P450 family 307 subfamily A+ko00981//Insect hormone biosynthesis
Unigene132_All	ko03015//mRNA surveillance pathway;ko05169//Epstein-Barr virus infection;ko04330//Notch signaling pathway	Infectious diseases: Viral;Signal transduction;Translation	Genetic Information Processing;Environmental Information Processing;Human Diseases	Novel_gene	4830	35.41	28.53	41.52	10.87	13.49	12.26	-1.52654	0	0		pol polyprotein [Lasius niger]	Reverse transcriptase (RNA-dependent DNA polymerase)	[R] KOG0017 FOG: Transposon-encoded proteins with TYA, reverse transcriptase, integrase domains in various combinations	Retrovirus-related Pol polyprotein from transposon 297 OS=Drosophila melanogaster GN=pol PE=3 SV=1			K14401//cleavage and polyadenylation specificity factor subunit 1+ko03015//mRNA surveillance pathway;K16803//cytoskeleton-associated protein 5;K06065//nuclear receptor co-repressor 2+ko04330//Notch signaling pathway+ko05169//Epstein-Barr virus infection;K08843//leucine-rich repeat kinase 1 [EC:2.7.11.1]
Unigene13316_All	ko04657//IL-17 signaling pathway;ko05165//Human papillomavirus infection;ko04012//ErbB signaling pathway;ko05226//Gastric cancer;ko04660//T cell receptor signaling pathway;ko05163//Human cytomegalovirus infection;ko04722//Neurotrophin signaling pathway;ko04110//Cell cycle;ko04310//Wnt signaling pathway;ko04932//Non-alcoholic fatty liver disease (NAFLD);ko04931//Insulin resistance;ko04360//Axon gu…	Drug resistance: Antineoplastic;Cell growth and death;Development;Endocrine and metabolic diseases;Endocrine system;Cellular community - eukaryotes;Cancers: Overview;Nervous system;Infectious diseases: Viral;Signal transduction;Environmental adaptation;Immune system;Cancers: Specific types;Neurodegenerative diseases	Human Diseases;Organismal Systems;Cellular Processes;Environmental Information Processing	Novel_gene	1755	6.33	3.54	5.46	2.75	2.59	1.14	-1.23132	1.04251e-43	3.88336e-44	XM_022060520.1 PREDICTED: Zootermopsis nevadensis glycogen synthase kinase-3 beta (LOC110828127), transcript variant X4, mRNA	PREDICTED: protein kinase shaggy isoform X10 [Anoplophora glabripennis]	Protein kinase domain	[G] KOG0658 Glycogen synthase kinase-3	Protein kinase shaggy OS=Drosophila melanogaster GN=sgg PE=1 SV=3			K03083//glycogen synthase kinase 3 beta [EC:2.7.11.26]+ko04390//Hippo signaling pathway+ko04360//Axon guidance+ko05226//Gastric cancer+ko05225//Hepatocellular carcinoma+ko04510//Focal adhesion+ko01521//EGFR tyrosine kinase inhibitor resistance+ko04919//Thyroid hormone signaling pathway+ko04917//Prolactin signaling pathway+ko04916//Melanogenesis+ko04910//Insulin signaling pathway+ko04657//IL-17 si…
Unigene14062_All	ko04150//mTOR signaling pathway	Signal transduction	Environmental Information Processing	Novel_gene	2299	21.02	13.15	15.41	9.03	2.66	3.09	-1.72072	1.08273e-299	6.62587e-301		PREDICTED: sodium-coupled neutral amino acid transporter 9 [Acyrthosiphon pisum] >XP_016659127.1 PREDICTED: sodium-coupled neutral amino acid transporter 9 [Acyrthosiphon pisum]	Transmembrane amino acid transporter protein	[S] KOG4058 Uncharacterized conserved protein	Sodium-coupled neutral amino acid transporter 9 OS=Mus musculus GN=Slc38a9 PE=1 SV=1	GO:0016021//integral component of membrane		K14995//solute carrier family 38 (sodium-coupled neutral amino acid transporter), member 9+ko04150//mTOR signaling pathway;K14995//solute carrier family 38 (sodium-coupled neutral amino acid transporter), member 9+ko04150//mTOR signaling pathway;K14995//solute carrier family 38 (sodium-coupled neutral amino acid transporter), member 9+ko04150//mTOR signaling pathway;K14995//solute carrier family …
Unigene149_All	ko04142//Lysosome	Transport and catabolism	Cellular Processes	Novel_gene	1778	6.31	5.35	5.67	2.92	2.06	2.12	-1.27839	8.04501e-53	2.58089e-53		PREDICTED: putative inorganic phosphate cotransporter isoform X1 [Acyrthosiphon pisum]	Major Facilitator Superfamily	[G] KOG2532 Permease of the major facilitator superfamily	Sialin OS=Homo sapiens GN=SLC17A5 PE=1 SV=2			K12301//MFS transporter, ACS family, solute carrier family 17 (sodium-dependent inorganic phosphate cotransporter), member 5+ko04142//Lysosome;K12301//MFS transporter, ACS family, solute carrier family 17 (sodium-dependent inorganic phosphate cotransporter), member 5+ko04142//Lysosome;K12301//MFS transporter, ACS family, solute carrier family 17 (sodium-dependent inorganic phosphate cotransporter…
Unigene1749_All	ko04391//Hippo signaling pathway - fly	Signal transduction	Environmental Information Processing	Novel_gene	4412	11.73	10.28	10.79	4.28	6.28	5.73	-1.01306	1.73502e-172	1.85194e-173	XM_011214444.2 PREDICTED: Bactrocera dorsalis cyclin-dependent kinase 8 (LOC105232668), mRNA	PREDICTED: myosin-I heavy chain [Bemisia tabaci]	Myosin head (motor domain)	[Z] KOG0160 Myosin class V heavy chain	Cyclin-dependent kinase 8 OS=Drosophila melanogaster GN=Cdk8 PE=1 SV=2		ARID	K16677//dachs+ko04391//Hippo signaling pathway - fly;K16677//dachs+ko04391//Hippo signaling pathway - fly;K16677//dachs+ko04391//Hippo signaling pathway - fly;K16677//dachs+ko04391//Hippo signaling pathway - fly;K16677//dachs+ko04391//Hippo signaling pathway - fly
Unigene1767_All	ko04015//Rap1 signaling pathway;ko00982//Drug metabolism - cytochrome P450;ko04530//Tight junction;ko04151//PI3K-Akt signaling pathway;ko05165//Human papillomavirus infection	Signal transduction;Cellular community - eukaryotes;Xenobiotics biodegradation and metabolism;Infectious diseases: Viral	Human Diseases;Environmental Information Processing;Metabolism;Cellular Processes	Novel_gene	2845	4.37	2.68	3.88	1.2	1.03	2.6	-1.17969	4.96995e-48	1.72004e-48	CP017003.1 Plasmodium falciparum 3D7 chromosome 13 sequence	PREDICTED: senecionine N-oxygenase [Acyrthosiphon pisum]	Flavin-binding monooxygenase-like	[Q] KOG1399 Flavin-containing monooxygenase	Dimethylaniline monooxygenase [N-oxide-forming] 5 OS=Mus musculus GN=Fmo5 PE=1 SV=4	GO:0050661//NADP binding;GO:0004499//N,N-dimethylaniline monooxygenase activity;GO:0050660//flavin adenine dinucleotide binding		K05631//atrophin-1 interacting protein 3 (BAI1-associated protein 1)+ko04530//Tight junction+ko04151//PI3K-Akt signaling pathway+ko04015//Rap1 signaling pathway+ko05165//Human papillomavirus infection;K00485//dimethylaniline monooxygenase (N-oxide forming) [EC:1.14.13.8]+ko00982//Drug metabolism - cytochrome P450;K00485//dimethylaniline monooxygenase (N-oxide forming) [EC:1.14.13.8]+ko00982//Drug…
Unigene1858_All	ko05202//Transcriptional misregulation in cancer	Cancers: Overview	Human Diseases	Novel_gene	4974	10.15	11.21	9.94	3.11	1.13	2.13	-2.28257	0	0	XM_017316193.1 PREDICTED: Mus musculus leucine rich repeat containing 63 (Lrrc63), transcript variant X3, mRNA	LOW QUALITY PROTEIN: AF4/FMR2 family member 1 [Phascolarctos cinereus]	AF-4 proto-oncoprotein					K15184//AF4/FMR2 family member 1+ko05202//Transcriptional misregulation in cancer;K15194//AF4/FMR2 family member 2
Unigene1964_All	ko00230//Purine metabolism	Nucleotide metabolism	Metabolism	Novel_gene	4000	6.67	6.62	7.93	1.73	3.06	2.02	-1.64543	1.58684e-213	1.35744e-214	XM_022334158.1 PREDICTED: Nilaparvata lugens cGMP-specific 3',5'-cyclic phosphodiesterase (LOC111048284), mRNA	PREDICTED: cGMP-specific 3',5'-cyclic phosphodiesterase-like isoform X2 [Bemisia tabaci]	3'5'-cyclic nucleotide phosphodiesterase	[T] KOG3689 Cyclic nucleotide phosphodiesterase	cGMP-specific 3',5'-cyclic phosphodiesterase OS=Drosophila pseudoobscura pseudoobscura GN=Pde6 PE=3 SV=3			K13763//cGMP-specific 3',5'-cyclic phosphodiesterase, invertebrate [EC:3.1.4.35]+ko00230//Purine metabolism;K13763//cGMP-specific 3',5'-cyclic phosphodiesterase, invertebrate [EC:3.1.4.35]+ko00230//Purine metabolism;K13763//cGMP-specific 3',5'-cyclic phosphodiesterase, invertebrate [EC:3.1.4.35]+ko00230//Purine metabolism;K13763//cGMP-specific 3',5'-cyclic phosphodiesterase, invertebrate [EC:3.1.…
Unigene2039_All	ko01100//Metabolic pathways;ko04614//Renin-angiotensin system;ko04640//Hematopoietic cell lineage;ko00480//Glutathione metabolism	Metabolism of other amino acids;Global and overview maps;Endocrine system;Immune system	Organismal Systems;Metabolism	Novel_gene	4453	3.41	6.28	7.01	2.02	1.67	1.82	-1.59644	7.10046e-180	7.30114e-181		PREDICTED: uncharacterized protein LOC107272872 [Cephus cinctus]	Peptidase family M1	[EO] KOG1046 Puromycin-sensitive aminopeptidase and related aminopeptidases	Aminopeptidase N OS=Manduca sexta GN=APN2 PE=1 SV=2			K11140//aminopeptidase N [EC:3.4.11.2]+ko04640//Hematopoietic cell lineage+ko04614//Renin-angiotensin system+ko00480//Glutathione metabolism+ko01100//Metabolic pathways;K11140//aminopeptidase N [EC:3.4.11.2]+ko04640//Hematopoietic cell lineage+ko04614//Renin-angiotensin system+ko00480//Glutathione metabolism+ko01100//Metabolic pathways;K11140//aminopeptidase N [EC:3.4.11.2]+ko04640//Hematopoietic…
Unigene2293_All	ko00982//Drug metabolism - cytochrome P450;ko00053//Ascorbate and aldarate metabolism;ko00140//Steroid hormone biosynthesis;ko00830//Retinol metabolism;ko00040//Pentose and glucuronate interconversions;ko05204//Chemical carcinogenesis;ko01100//Metabolic pathways;ko00860//Porphyrin and chlorophyll metabolism;ko00980//Metabolism of xenobiotics by cytochrome P450;ko00983//Drug metabolism - other enz…	Lipid metabolism;Carbohydrate metabolism;Cancers: Overview;Global and overview maps;Xenobiotics biodegradation and metabolism;Metabolism of cofactors and vitamins	Metabolism;Human Diseases	Novel_gene	1910	5.97	3.95	4.82	2.18	2.49	2.03	-1.13238	2.3404e-40	9.26496e-41		UDP-glucuronosyltransferase 2B30-like isoform X1 [Nilaparvata lugens]	UDP-glucoronosyl and UDP-glucosyl transferase	[GC] KOG1192 UDP-glucuronosyl and UDP-glucosyl transferase	UDP-glucuronosyltransferase 2B33 OS=Macaca mulatta GN=UGT2B33 PE=1 SV=1	GO:0008152//metabolic process;GO:0015020//glucuronosyltransferase activity;GO:0016021//integral component of membrane		K00699//glucuronosyltransferase [EC:2.4.1.17]+ko00980//Metabolism of xenobiotics by cytochrome P450+ko00982//Drug metabolism - cytochrome P450+ko00983//Drug metabolism - other enzymes+ko00040//Pentose and glucuronate interconversions+ko00860//Porphyrin and chlorophyll metabolism+ko00053//Ascorbate and aldarate metabolism+ko00830//Retinol metabolism+ko05204//Chemical carcinogenesis+ko00140//Steroi…
Unigene242_All	ko00140//Steroid hormone biosynthesis;ko00040//Pentose and glucuronate interconversions;ko00830//Retinol metabolism;ko00982//Drug metabolism - cytochrome P450;ko00860//Porphyrin and chlorophyll metabolism;ko05204//Chemical carcinogenesis;ko00980//Metabolism of xenobiotics by cytochrome P450;ko00983//Drug metabolism - other enzymes;ko01100//Metabolic pathways;ko00053//Ascorbate and aldarate metabo…	Metabolism of cofactors and vitamins;Lipid metabolism;Global and overview maps;Cancers: Overview;Xenobiotics biodegradation and metabolism;Carbohydrate metabolism	Human Diseases;Metabolism	Novel_gene	1817	9.53	10.92	9.2	3.13	3.77	2.14	-1.71166	5.89871e-140	7.87992e-141		uncharacterized protein LOC110826505 [Zootermopsis nevadensis]	UDP-glucoronosyl and UDP-glucosyl transferase	[GC] KOG1192 UDP-glucuronosyl and UDP-glucosyl transferase	UDP-glucuronosyltransferase 2B1 OS=Rattus norvegicus GN=Ugt2b1 PE=2 SV=1			K00699//glucuronosyltransferase [EC:2.4.1.17]+ko00980//Metabolism of xenobiotics by cytochrome P450+ko00982//Drug metabolism - cytochrome P450+ko00983//Drug metabolism - other enzymes+ko00040//Pentose and glucuronate interconversions+ko00860//Porphyrin and chlorophyll metabolism+ko00053//Ascorbate and aldarate metabolism+ko00830//Retinol metabolism+ko05204//Chemical carcinogenesis+ko00140//Steroi…
Unigene2637_All	ko01100//Metabolic pathways;ko00561//Glycerolipid metabolism;ko00564//Glycerophospholipid metabolism;ko04072//Phospholipase D signaling pathway;ko04975//Fat digestion and absorption	Global and overview maps;Lipid metabolism;Signal transduction;Digestive system	Metabolism;Organismal Systems;Environmental Information Processing	Novel_gene	2743	5.01	2.23	4.44	1.8	1.6	1.33	-1.29978	2.85816e-57	8.50614e-58		PREDICTED: 1-acyl-sn-glycerol-3-phosphate acyltransferase alpha-like [Amyelois transitella]	Acyltransferase	[I] KOG2848 1-acyl-sn-glycerol-3-phosphate acyltransferase	1-acyl-sn-glycerol-3-phosphate acyltransferase alpha OS=Homo sapiens GN=AGPAT1 PE=1 SV=2			K13509//lysophosphatidate acyltransferase [EC:2.3.1.51]+ko04072//Phospholipase D signaling pathway+ko04975//Fat digestion and absorption+ko00564//Glycerophospholipid metabolism+ko00561//Glycerolipid metabolism+ko01100//Metabolic pathways;K13509//lysophosphatidate acyltransferase [EC:2.3.1.51]+ko04072//Phospholipase D signaling pathway+ko04975//Fat digestion and absorption+ko00564//Glycerophosphol…
Unigene3011_All	ko01100//Metabolic pathways;ko00562//Inositol phosphate metabolism;ko04070//Phosphatidylinositol signaling system	Signal transduction;Global and overview maps;Carbohydrate metabolism	Environmental Information Processing;Metabolism	Novel_gene	2660	3.7	4.25	4.85	2.44	1.9	1.02	-1.24305	1.10976e-56	3.33047e-57		phosphatidylinositol 4,5-bisphosphate 5-phosphatase A-like isoform X1 [Zootermopsis nevadensis]	Endonuclease/Exonuclease/phosphatase family	[U] KOG0565 Inositol polyphosphate 5-phosphatase and related proteins	Inositol polyphosphate 5-phosphatase K OS=Mus musculus GN=Inpp5k PE=1 SV=2			K01106//inositol-1,4,5-trisphosphate 5-phosphatase [EC:3.1.3.56]+ko04070//Phosphatidylinositol signaling system+ko00562//Inositol phosphate metabolism+ko01100//Metabolic pathways;K01106//inositol-1,4,5-trisphosphate 5-phosphatase [EC:3.1.3.56]+ko04070//Phosphatidylinositol signaling system+ko00562//Inositol phosphate metabolism+ko01100//Metabolic pathways;K01106//inositol-1,4,5-trisphosphate 5-ph…
Unigene3103_All	ko05203//Viral carcinogenesis;ko05034//Alcoholism;ko05322//Systemic lupus erythematosus	Substance dependence;Cancers: Overview;Immune diseases	Human Diseases	Novel_gene	415	6.57	6.91	9	2.39	1.68	2.52	-1.74475	7.23359e-22	4.44159e-22		Histone H4 [Folsomia candida]	Centromere kinetochore component CENP-T histone fold	[B] KOG3467 Histone H4	Histone H4 OS=Rhynchosciara americana GN=His4 PE=3 SV=2	GO:0003677//DNA binding;GO:0005634//nucleus;GO:0006334//nucleosome assembly;GO:0046982//protein heterodimerization activity;GO:0000786//nucleosome		K11254//histone H4+ko05322//Systemic lupus erythematosus+ko05034//Alcoholism+ko05203//Viral carcinogenesis;K11254//histone H4+ko05322//Systemic lupus erythematosus+ko05034//Alcoholism+ko05203//Viral carcinogenesis;K11254//histone H4+ko05322//Systemic lupus erythematosus+ko05034//Alcoholism+ko05203//Viral carcinogenesis;K11254//histone H4+ko05322//Systemic lupus erythematosus+ko05034//Alcoholism+k…
Unigene3800_All	ko03430//Mismatch repair;ko03460//Fanconi anemia pathway;ko03440//Homologous recombination;ko03030//DNA replication;ko03420//Nucleotide excision repair	Replication and repair	Genetic Information Processing	Novel_gene	1242	9.12	7.15	5.7	3.52	3.94	3.12	-1.04844	6.77979e-34	3.07228e-34		Replication protein A 70 kDa DNA-binding subunit [Daphnia magna]	Replication factor-A C terminal domain	[L] KOG0851 Single-stranded DNA-binding replication protein A (RPA), large (70 kD) subunit and related ssDNA-binding proteins	Replication protein A 70 kDa DNA-binding subunit OS=Gallus gallus GN=RPA1 PE=2 SV=1	GO:0003677//DNA binding;GO:0005634//nucleus;GO:0006281//DNA repair;GO:0006260//DNA replication;GO:0006310//DNA recombination		K07466//replication factor A1+ko03420//Nucleotide excision repair+ko03030//DNA replication+ko03440//Homologous recombination+ko03430//Mismatch repair+ko03460//Fanconi anemia pathway;K07466//replication factor A1+ko03420//Nucleotide excision repair+ko03030//DNA replication+ko03440//Homologous recombination+ko03430//Mismatch repair+ko03460//Fanconi anemia pathway;K07466//replication factor A1+ko034…
Unigene4002_All	ko05322//Systemic lupus erythematosus;ko05202//Transcriptional misregulation in cancer;ko05034//Alcoholism	Immune diseases;Cancers: Overview;Substance dependence	Human Diseases	Novel_gene	765	39.08	32.74	29.82	17.52	14.46	12.93	-1.16448	3.43438e-105	5.97658e-106	AF378198.1 Rhynchosciara americana histone H1 (rah1), histone H3 (rah3), histone H4 (rah4), histone H2A (rah2a), and histone H2B (rah2b) genes, complete cds	PREDICTED: uncharacterized protein LOC108316382 [Cebus capucinus imitator]	Core histone H2A/H2B/H3/H4	[B] KOG1745 Histones H3 and H4	Histone H3 OS=Urechis caupo PE=1 SV=2			K11253//histone H3+ko05322//Systemic lupus erythematosus+ko05034//Alcoholism+ko05202//Transcriptional misregulation in cancer;K11253//histone H3+ko05322//Systemic lupus erythematosus+ko05034//Alcoholism+ko05202//Transcriptional misregulation in cancer;K11253//histone H3+ko05322//Systemic lupus erythematosus+ko05034//Alcoholism+ko05202//Transcriptional misregulation in cancer;K11253//histone H3+ko…
Unigene4021_All	ko04320//Dorso-ventral axis formation	Development	Organismal Systems	Novel_gene	1261	27.74	26.42	35.06	4.35	3.24	2.23	-3.16902	0	0			FAM176 family	[M] LSE0601 A Pollen extensin-like protein (Pex)	Acrosin OS=Oryctolagus cuniculus GN=ACR PE=2 SV=1			K02184//formin 2+ko04320//Dorso-ventral axis formation
Unigene4084_All	ko01100//Metabolic pathways;ko04916//Melanogenesis;ko00350//Tyrosine metabolism	Global and overview maps;Amino acid metabolism;Endocrine system	Organismal Systems;Metabolism	Novel_gene	2546	127.59	39.47	8.05	11.02	18.87	24.36	-1.69923	0	0	NM_001011627.1 Apis mellifera phenoloxidase subunit A3 (PPO), mRNA >AY242387.2 Apis mellifera prophenoloxidase mRNA, complete cds	prophenoloxidase [Riptortus pedestris]	Hemocyanin, ig-like domain		Phenoloxidase 2 OS=Drosophila melanogaster GN=PPO2 PE=1 SV=1			K00505//tyrosinase [EC:1.14.18.1]+ko04916//Melanogenesis+ko00350//Tyrosine metabolism+ko01100//Metabolic pathways;K00505//tyrosinase [EC:1.14.18.1]+ko04916//Melanogenesis+ko00350//Tyrosine metabolism+ko01100//Metabolic pathways;K00505//tyrosinase [EC:1.14.18.1]+ko04916//Melanogenesis+ko00350//Tyrosine metabolism+ko01100//Metabolic pathways;K00505//tyrosinase [EC:1.14.18.1]+ko04916//Melanogenesis+…
Unigene4100_All	ko05322//Systemic lupus erythematosus;ko05034//Alcoholism;ko05202//Transcriptional misregulation in cancer	Immune diseases;Substance dependence;Cancers: Overview	Human Diseases	Novel_gene	752	51.71	58.46	57.1	12.85	10.65	11.22	-2.25517	0	0	X56335.1 Chironomus thummi histone H1, H2A, H2B, H3, H4 genes with TFB1 insertion (foldback transposable element)	PREDICTED: histone H3.3-like isoform X2 [Leptonychotes weddellii] >XP_022363863.1 histone H3.3 isoform X2 [Enhydra lutris kenyoni]	Core histone H2A/H2B/H3/H4	[B] KOG1745 Histones H3 and H4	Histone H3.3 type 2 OS=Caenorhabditis elegans GN=his-72 PE=1 SV=3			K11253//histone H3+ko05322//Systemic lupus erythematosus+ko05034//Alcoholism+ko05202//Transcriptional misregulation in cancer;K11253//histone H3+ko05322//Systemic lupus erythematosus+ko05034//Alcoholism+ko05202//Transcriptional misregulation in cancer;K11253//histone H3+ko05322//Systemic lupus erythematosus+ko05034//Alcoholism+ko05202//Transcriptional misregulation in cancer;K11253//histone H3+ko…
Unigene4177_All	ko05146//Amoebiasis;ko05226//Gastric cancer	Cancers: Specific types;Infectious diseases: Parasitic	Human Diseases	Novel_gene	3208	149.5	213.44	283.89	102.19	109.25	79.43	-1.14906	0	0		cement precursor protein 3B variant 3 [Phragmatopoma californica]	GMC oxidoreductase	[Y] KOG2992 Nucleolar GTPase/ATPase p130	Sericin-2 (Fragment) OS=Galleria mellonella GN=SER2 PE=2 SV=1	GO:0005576//extracellular region		K22017//mucin-4;K22017//mucin-4;K09453//snRNA-activating protein complex subunit 4;K22022//mucin-21;K10955//mucin-2+ko05226//Gastric cancer+ko05146//Amoebiasis
Unigene4218_All	ko01100//Metabolic pathways;ko00500//Starch and sucrose metabolism;ko00052//Galactose metabolism	Carbohydrate metabolism;Global and overview maps	Metabolism	Novel_gene	1783	5.68	22.27	12.27	8.6	5.15	6.16	-1.00436	1.26973e-82	2.78651e-83		PREDICTED: maltase A3-like [Diuraphis noxia] >XP_015375757.1 PREDICTED: maltase A3-like [Diuraphis noxia]	Alpha amylase, catalytic domain	[G] KOG0471 Alpha-amylase	Maltase A2 OS=Drosophila melanogaster GN=Mal-A2 PE=2 SV=2	GO:0005975//carbohydrate metabolic process;GO:0003824//catalytic activity		K01187//alpha-glucosidase [EC:3.2.1.20]+ko00052//Galactose metabolism+ko00500//Starch and sucrose metabolism+ko01100//Metabolic pathways;K01187//alpha-glucosidase [EC:3.2.1.20]+ko00052//Galactose metabolism+ko00500//Starch and sucrose metabolism+ko01100//Metabolic pathways;K01187//alpha-glucosidase [EC:3.2.1.20]+ko00052//Galactose metabolism+ko00500//Starch and sucrose metabolism+ko01100//Metabol…
Unigene4240_All	ko04657//IL-17 signaling pathway;ko05146//Amoebiasis;ko05226//Gastric cancer	Immune system;Infectious diseases: Parasitic;Cancers: Specific types	Human Diseases;Organismal Systems	Novel_gene	4720	193.19	149.89	171.23	96.93	73.89	83.5	-1.01031	0	0	XM_013478510.1 Eimeria maxima hypothetical protein, conserved partial mRNA	proteophosphoglycan ppg4 [Leishmania braziliensis MHOM/BR/75/M2904] >CAM43271.1 proteophosphoglycan ppg4 [Leishmania braziliensis MHOM/BR/75/M2904]	UBA/TS-N domain	[K] KOG1878 Nuclear receptor coregulator SMRT/SMRTER, contains Myb-like domains	Probable serine/threonine-protein kinase fhkB OS=Dictyostelium discoideum GN=fhkB PE=3 SV=1	GO:0010468//regulation of gene expression;GO:0003682//chromatin binding;GO:0016021//integral component of membrane	MYB	K22016//mucin-3/17;K21125//mucin-5AC+ko04657//IL-17 signaling pathway;K10955//mucin-2+ko05226//Gastric cancer+ko05146//Amoebiasis;K21125//mucin-5AC+ko04657//IL-17 signaling pathway;K21125//mucin-5AC+ko04657//IL-17 signaling pathway
Unigene4266_All	ko00650//Butanoate metabolism;ko01212//Fatty acid metabolism;ko00630//Glyoxylate and dicarboxylate metabolism;ko00900//Terpenoid backbone biosynthesis;ko00640//Propanoate metabolism;ko01200//Carbon metabolism;ko00071//Fatty acid degradation;ko00072//Synthesis and degradation of ketone bodies;ko00380//Tryptophan metabolism;ko01100//Metabolic pathways;ko00280//Valine, leucine and isoleucine degrada…	Carbohydrate metabolism;Amino acid metabolism;Global and overview maps;Lipid metabolism;Metabolism of terpenoids and polyketides	Metabolism	Novel_gene	586	3.06	2.11	4.27	1.64	1.43	1.21	-1.12157	2.86662e-08	3.13446e-08		PREDICTED: acetyl-CoA acetyltransferase, cytosolic [Wasmannia auropunctata]	Thiolase, C-terminal domain	[I] KOG1390 Acetyl-CoA acetyltransferase	Acetyl-CoA acetyltransferase, cytosolic OS=Homo sapiens GN=ACAT2 PE=1 SV=2	GO:0008152//metabolic process;GO:0016747//transferase activity, transferring acyl groups other than amino-acyl groups		K00626//acetyl-CoA C-acetyltransferase [EC:2.3.1.9]+ko01200//Carbon metabolism+ko00900//Terpenoid backbone biosynthesis+ko00640//Propanoate metabolism+ko00280//Valine, leucine and isoleucine degradation+ko00650//Butanoate metabolism+ko00620//Pyruvate metabolism+ko00310//Lysine degradation+ko00380//Tryptophan metabolism+ko01100//Metabolic pathways+ko01212//Fatty acid metabolism+ko00071//Fatty acid…
Unigene4746_All	ko04975//Fat digestion and absorption;ko01100//Metabolic pathways;ko04972//Pancreatic secretion;ko00561//Glycerolipid metabolism;ko00100//Steroid biosynthesis;ko00983//Drug metabolism - other enzymes;ko04725//Cholinergic synapse;ko00564//Glycerophospholipid metabolism	Global and overview maps;Xenobiotics biodegradation and metabolism;Lipid metabolism;Nervous system;Digestive system	Organismal Systems;Metabolism	Novel_gene	1785	8.8	6.83	3.23	2.18	2.09	2.18	-1.54449	3.47203e-76	8.15551e-77	XM_022309851.1 PREDICTED: Myzus persicae esterase FE4-like (LOC111030392), mRNA	esterase FE4-like [Myzus persicae]	Carboxylesterase family	[R] KOG1516 Carboxylesterase and related proteins	Esterase FE4 OS=Myzus persicae PE=1 SV=1			K12298//bile salt-stimulated lipase [EC:3.1.1.3 3.1.1.13]+ko04975//Fat digestion and absorption+ko04972//Pancreatic secretion+ko00100//Steroid biosynthesis+ko00561//Glycerolipid metabolism+ko01100//Metabolic pathways;K01044//carboxylesterase 1 [EC:3.1.1.1]+ko00983//Drug metabolism - other enzymes+ko01100//Metabolic pathways;K01044//carboxylesterase 1 [EC:3.1.1.1]+ko00983//Drug metabolism - other …
Unigene4920_All	ko04020//Calcium signaling pathway;ko04080//Neuroactive ligand-receptor interaction	Signal transduction;Signaling molecules and interaction	Environmental Information Processing	Novel_gene	1391	4.09	3.49	6.07	1.91	2.35	2.15	-1.08569	1.414e-25	7.84158e-26		PREDICTED: FMRFamide receptor-like [Orussus abietinus]	Serpentine type 7TM GPCR chemoreceptor Srw	[R] KOG3656 FOG: 7 transmembrane receptor	Probable G-protein coupled receptor 139 OS=Homo sapiens GN=GPR139 PE=2 SV=1			K05052//neuromedin U receptor 1+ko04080//Neuroactive ligand-receptor interaction;K05052//neuromedin U receptor 1+ko04080//Neuroactive ligand-receptor interaction;K05052//neuromedin U receptor 1+ko04080//Neuroactive ligand-receptor interaction;K04223//tachykinin receptor 2+ko04020//Calcium signaling pathway+ko04080//Neuroactive ligand-receptor interaction
Unigene5022_All	ko00350//Tyrosine metabolism;ko01100//Metabolic pathways;ko04916//Melanogenesis	Amino acid metabolism;Endocrine system;Global and overview maps	Metabolism;Organismal Systems	Novel_gene	2451	83.94	25.86	3.69	5.66	10.2	13.66	-1.95231	0	0	XM_004533475.1 PREDICTED: Ceratitis capitata phenoloxidase 2-like (LOC101460037), mRNA	PREDICTED: phenoloxidase 2 [Acyrthosiphon pisum]	Hemocyanin, ig-like domain		Phenoloxidase 2 OS=Drosophila melanogaster GN=PPO2 PE=1 SV=1			K00505//tyrosinase [EC:1.14.18.1]+ko04916//Melanogenesis+ko00350//Tyrosine metabolism+ko01100//Metabolic pathways;K00505//tyrosinase [EC:1.14.18.1]+ko04916//Melanogenesis+ko00350//Tyrosine metabolism+ko01100//Metabolic pathways;K00505//tyrosinase [EC:1.14.18.1]+ko04916//Melanogenesis+ko00350//Tyrosine metabolism+ko01100//Metabolic pathways;K00505//tyrosinase [EC:1.14.18.1]+ko04916//Melanogenesis+…
Unigene5204_All	ko05202//Transcriptional misregulation in cancer;ko05322//Systemic lupus erythematosus;ko05034//Alcoholism	Immune diseases;Substance dependence;Cancers: Overview	Human Diseases	Novel_gene	703	64.12	53.72	48.62	32.51	20.54	27.22	-1.035	6.89384e-129	9.80125e-130	KM040838.1 Elysia mercieri isolate Emer_09Gua01 histone H3 (H3) gene, partial cds	histone H3.v1 [Mus pahari]	Core histone H2A/H2B/H3/H4	[B] KOG1745 Histones H3 and H4	Histone H3 OS=Platynereis dumerilii PE=3 SV=2			K11253//histone H3+ko05322//Systemic lupus erythematosus+ko05034//Alcoholism+ko05202//Transcriptional misregulation in cancer;K11253//histone H3+ko05322//Systemic lupus erythematosus+ko05034//Alcoholism+ko05202//Transcriptional misregulation in cancer;K11253//histone H3+ko05322//Systemic lupus erythematosus+ko05034//Alcoholism+ko05202//Transcriptional misregulation in cancer;K11253//histone H3+ko…
Unigene5208_All	ko04146//Peroxisome	Transport and catabolism	Cellular Processes	Novel_gene	724	11.46	10.77	15.07	4.61	4.62	4.65	-1.41363	7.90501e-50	2.65248e-50		PREDICTED: mpv17-like protein [Bemisia tabaci] >XP_018895635.1 PREDICTED: mpv17-like protein [Bemisia tabaci] >XP_018895636.1 PREDICTED: mpv17-like protein [Bemisia tabaci]	Mpv17 / PMP22 family	[R] KOG1944 Peroxisomal membrane protein MPV17 and related proteins	Mpv17-like protein OS=Xenopus laevis GN=mpv17l PE=2 SV=1	GO:0016021//integral component of membrane		K13349//Mpv17-like protein+ko04146//Peroxisome;K13349//Mpv17-like protein+ko04146//Peroxisome;K13349//Mpv17-like protein+ko04146//Peroxisome;K13349//Mpv17-like protein+ko04146//Peroxisome;K13349//Mpv17-like protein+ko04146//Peroxisome
Unigene6041_All	ko04657//IL-17 signaling pathway;ko05226//Gastric cancer;ko05146//Amoebiasis	Infectious diseases: Parasitic;Immune system;Cancers: Specific types	Human Diseases;Organismal Systems	Novel_gene	2148	7.99	5.95	4.76	3.48	2.52	3.27	-1.00579	1.82466e-47	6.36847e-48		Ovomucin, beta-subunit, partial [Intoshia linei]	Predicted AAA-ATPase	[PT] KOG3599 Ca2+-modulated nonselective cation channel polycystin	Location of vulva defective 1 OS=Caenorhabditis elegans GN=lov-1 PE=1 SV=4			K10955//mucin-2+ko05226//Gastric cancer+ko05146//Amoebiasis;K21125//mucin-5AC+ko04657//IL-17 signaling pathway;K10955//mucin-2+ko05226//Gastric cancer+ko05146//Amoebiasis;K10955//mucin-2+ko05226//Gastric cancer+ko05146//Amoebiasis;K10955//mucin-2+ko05226//Gastric cancer+ko05146//Amoebiasis
Unigene6112_All	ko00300//Lysine biosynthesis;ko01210//2-Oxocarboxylic acid metabolism;ko00380//Tryptophan metabolism;ko01100//Metabolic pathways;ko00310//Lysine degradation	Amino acid metabolism;Global and overview maps	Metabolism	Novel_gene	1628	17.54	10.3	22.44	9.68	6.45	2.51	-1.41227	4.32649e-159	5.0413e-160		PREDICTED: kynurenine/alpha-aminoadipate aminotransferase, mitochondrial-like [Bemisia tabaci]	Aminotransferase class I and II	[E] KOG0634 Aromatic amino acid aminotransferase and related proteins	Kynurenine/alpha-aminoadipate aminotransferase, mitochondrial OS=Homo sapiens GN=AADAT PE=1 SV=2	GO:0009058//biosynthetic process;GO:0008483//transaminase activity;GO:0030170//pyridoxal phosphate binding		K00825//kynurenine/2-aminoadipate aminotransferase [EC:2.6.1.7 2.6.1.39]+ko00300//Lysine biosynthesis+ko00310//Lysine degradation+ko00380//Tryptophan metabolism+ko01100//Metabolic pathways+ko01210//2-Oxocarboxylic acid metabolism;K00825//kynurenine/2-aminoadipate aminotransferase [EC:2.6.1.7 2.6.1.39]+ko00300//Lysine biosynthesis+ko00310//Lysine degradation+ko00380//Tryptophan metabolism+ko01100/…
Unigene6115_All	ko00910//Nitrogen metabolism	Energy metabolism	Metabolism	Novel_gene	913	4.85	4.18	2.57	1.18	2.5	1.51	-1.16528	4.34905e-16	3.28117e-16		PREDICTED: carbonic anhydrase 7-like isoform X1 [Diuraphis noxia]	Eukaryotic-type carbonic anhydrase	[R] KOG0382 Carbonic anhydrase	Carbonic anhydrase 2 OS=Tribolodon hakonensis GN=ca2 PE=2 SV=3			K01672//carbonic anhydrase [EC:4.2.1.1]+ko00910//Nitrogen metabolism;K01672//carbonic anhydrase [EC:4.2.1.1]+ko00910//Nitrogen metabolism;K01672//carbonic anhydrase [EC:4.2.1.1]+ko00910//Nitrogen metabolism;K01672//carbonic anhydrase [EC:4.2.1.1]+ko00910//Nitrogen metabolism;K01672//carbonic anhydrase [EC:4.2.1.1]+ko00910//Nitrogen metabolism
Unigene6214_All	ko00601//Glycosphingolipid biosynthesis - lacto and neolacto series;ko01100//Metabolic pathways	Global and overview maps;Glycan biosynthesis and metabolism	Metabolism	Novel_gene	1326	17.35	18.37	12.93	7.99	8.02	8.04	-1.01197	5.68267e-74	1.36137e-74		PREDICTED: beta-1,3-galactosyltransferase 1 isoform X2 [Harpegnathos saltator]	Galactosyltransferase	[G] KOG2287 Galactosyltransferases	Beta-1,3-galactosyltransferase 1 OS=Gorilla gorilla gorilla GN=B3GALT1 PE=3 SV=1	GO:0006486//protein glycosylation;GO:0016021//integral component of membrane;GO:0008378//galactosyltransferase activity;GO:0000139//Golgi membrane		K07819//beta-1,3-galactosyltransferase 1 [EC:2.4.1.86]+ko00601//Glycosphingolipid biosynthesis - lacto and neolacto series+ko01100//Metabolic pathways;K07819//beta-1,3-galactosyltransferase 1 [EC:2.4.1.86]+ko00601//Glycosphingolipid biosynthesis - lacto and neolacto series+ko01100//Metabolic pathways;K07819//beta-1,3-galactosyltransferase 1 [EC:2.4.1.86]+ko00601//Glycosphingolipid biosynthesis - …
Unigene6507_All	ko00983//Drug metabolism - other enzymes;ko04725//Cholinergic synapse;ko00564//Glycerophospholipid metabolism	Lipid metabolism;Xenobiotics biodegradation and metabolism;Nervous system	Metabolism;Organismal Systems	Novel_gene	1810	27.23	24.98	21.64	7.95	8.16	8.51	-1.58179	0	0		PREDICTED: esterase E4 [Acyrthosiphon pisum]	Carboxylesterase family	[R] KOG1516 Carboxylesterase and related proteins	Esterase E4 OS=Myzus persicae PE=1 SV=1	GO:0016787//hydrolase activity		K03927//carboxylesterase 2 [EC:3.1.1.1 3.1.1.84 3.1.1.56]+ko00983//Drug metabolism - other enzymes;K01049//acetylcholinesterase [EC:3.1.1.7]+ko04725//Cholinergic synapse+ko00564//Glycerophospholipid metabolism;K03927//carboxylesterase 2 [EC:3.1.1.1 3.1.1.84 3.1.1.56]+ko00983//Drug metabolism - other enzymes;K03927//carboxylesterase 2 [EC:3.1.1.1 3.1.1.84 3.1.1.56]+ko00983//Drug metabolism - other…
Unigene6654_All	ko04913//Ovarian steroidogenesis;ko04925//Aldosterone synthesis and secretion;ko04927//Cortisol synthesis and secretion;ko04976//Bile secretion;ko04979//Cholesterol metabolism;ko04934//Cushing syndrome;ko05160//Hepatitis C;ko04145//Phagosome;ko04975//Fat digestion and absorption;ko04977//Vitamin digestion and absorption	Transport and catabolism;Endocrine and metabolic diseases;Infectious diseases: Viral;Digestive system;Endocrine system	Cellular Processes;Human Diseases;Organismal Systems	Novel_gene	5582	7.32	7.84	9.59	4.25	2.31	2.18	-1.48845	1.29958e-301	7.83988e-303		PREDICTED: lysosome membrane protein 2 [Acyrthosiphon pisum]	CD36 family	[T] KOG3776 Plasma membrane glycoprotein CD36 and related membrane receptors	Lysosome membrane protein 2 OS=Rattus norvegicus GN=Scarb2 PE=1 SV=2	GO:0016021//integral component of membrane		K13885//scavenger receptor class B, member 1+ko04145//Phagosome+ko04913//Ovarian steroidogenesis+ko04979//Cholesterol metabolism+ko04975//Fat digestion and absorption+ko04977//Vitamin digestion and absorption+ko04976//Bile secretion+ko04934//Cushing syndrome+ko04927//Cortisol synthesis and secretion+ko04925//Aldosterone synthesis and secretion+ko05160//Hepatitis C;K13885//scavenger receptor class…
Unigene7183_All	ko04919//Thyroid hormone signaling pathway	Endocrine system	Organismal Systems	Novel_gene	3100	4.28	2.94	4.15	1.82	1.08	1.84	-1.25534	7.80334e-60	2.22819e-60		Mediator of RNA polymerase II transcription subunit 16 [Zootermopsis nevadensis]	Mediator complex subunit 16	[T] TWOG0558 Thyroid hormone receptor-associated protein, 95-kD subunit	Mediator of RNA polymerase II transcription subunit 16 OS=Aedes aegypti GN=MED16 PE=3 SV=1			K15159//mediator of RNA polymerase II transcription subunit 16+ko04919//Thyroid hormone signaling pathway;K15159//mediator of RNA polymerase II transcription subunit 16+ko04919//Thyroid hormone signaling pathway;K15159//mediator of RNA polymerase II transcription subunit 16+ko04919//Thyroid hormone signaling pathway;K15159//mediator of RNA polymerase II transcription subunit 16+ko04919//Thyroid h…
Unigene7338_All	ko05130//Pathogenic Escherichia coli infection;ko03015//mRNA surveillance pathway;ko03013//RNA transport	Translation;Infectious diseases: Bacterial	Human Diseases;Genetic Information Processing	Novel_gene	1781	34.24	55.84	74.84	1.11	3.12	1.28	-4.90971	0	0		cylicin-2-like [Fundulus heteroclitus]	Protein of unknown function (DUF1510)	[Y] KOG2992 Nucleolar GTPase/ATPase p130	Transcriptional regulator ATRX homolog OS=Caenorhabditis elegans GN=xnp-1 PE=1 SV=1			K10779//transcriptional regulator ATRX [EC:3.6.4.12];K11294//nucleolin+ko05130//Pathogenic Escherichia coli infection;K10779//transcriptional regulator ATRX [EC:3.6.4.12];K13171//serine/arginine repetitive matrix protein 1+ko03013//RNA transport+ko03015//mRNA surveillance pathway
Unigene7362_All	ko04624//Toll and Imd signaling pathway	Immune system	Organismal Systems	Novel_gene	2335	25.37	21.58	16.72	9.67	10.09	10.84	-1.05568	4.57383e-186	4.57383e-187		PREDICTED: suppressor of tumorigenicity 14 protein homolog [Diuraphis noxia]	Low-density lipoprotein receptor domain class A	[T] KOG1215 Low-density lipoprotein receptors containing Ca2+-binding EGF-like domains	Low-density lipoprotein receptor-related protein 2 OS=Homo sapiens GN=LRP2 PE=1 SV=3			K20674//modular serine protease [EC:3.4.21.-]+ko04624//Toll and Imd signaling pathway;K20674//modular serine protease [EC:3.4.21.-]+ko04624//Toll and Imd signaling pathway;K20674//modular serine protease [EC:3.4.21.-]+ko04624//Toll and Imd signaling pathway;K20674//modular serine protease [EC:3.4.21.-]+ko04624//Toll and Imd signaling pathway;K20674//modular serine protease [EC:3.4.21.-]+ko04624//…
Unigene7428_All	ko05014//Amyotrophic lateral sclerosis (ALS)	Neurodegenerative diseases	Human Diseases	Novel_gene	1511	58.25	83.12	80.51	28.4	40.64	33.59	-1.11286	0	0		PREDICTED: neurofilament heavy polypeptide [Poecilia latipinna]		[R] KOG0112 Large RNA-binding protein (RRM superfamily)	Neurofilament heavy polypeptide OS=Rattus norvegicus GN=Nefh PE=1 SV=4		HMG	K19607//X-linked retinitis pigmentosa GTPase regulator;K04574//neurofilament heavy polypeptide+ko05014//Amyotrophic lateral sclerosis (ALS);K19607//X-linked retinitis pigmentosa GTPase regulator;K19868//thioredoxin domain-containing protein 3;K19607//X-linked retinitis pigmentosa GTPase regulator
Unigene7507_All	ko00130//Ubiquinone and other terpenoid-quinone biosynthesis;ko01100//Metabolic pathways	Metabolism of cofactors and vitamins;Global and overview maps	Metabolism	Novel_gene	638	3.33	2.41	4.6	1.04	2.35	1.1	-1.20093	1.30597e-10	1.24366e-10		PREDICTED: ubiquinone biosynthesis O-methyltransferase, mitochondrial [Polistes dominula] >XP_015188001.1 PREDICTED: ubiquinone biosynthesis O-methyltransferase, mitochondrial [Polistes dominula] >XP_015188002.1 PREDICTED: ubiquinone biosynthesis O-methyltransferase, mitochondrial [Polistes dominula]	Methyltransferase domain	[H] KOG1270 Methyltransferases	Ubiquinone biosynthesis O-methyltransferase, mitochondrial OS=Bos taurus GN=COQ3 PE=2 SV=1			K00591//polyprenyldihydroxybenzoate methyltransferase / 3-demethylubiquinol 3-O-methyltransferase [EC:2.1.1.114 2.1.1.64]+ko00130//Ubiquinone and other terpenoid-quinone biosynthesis+ko01100//Metabolic pathways;K00591//polyprenyldihydroxybenzoate methyltransferase / 3-demethylubiquinol 3-O-methyltransferase [EC:2.1.1.114 2.1.1.64]+ko00130//Ubiquinone and other terpenoid-quinone biosynthesis+ko011…
Unigene7569_All	ko04010//MAPK signaling pathway	Signal transduction	Environmental Information Processing	Novel_gene	1287	4.78	3.95	3.43	1.49	1.64	2.05	-1.22816	1.45699e-25	8.08155e-26		PREDICTED: JNK-interacting protein 1 isoform X2 [Acyrthosiphon pisum]	Phosphotyrosine interaction domain (PTB/PID)	[T] KOG3775 Mitogen-activated protein kinase scaffold protein JIP	JNK-interacting protein 1 OS=Drosophila melanogaster GN=Aplip1 PE=1 SV=2			K04434//mitogen-activated protein kinase 8 interacting protein 1+ko04010//MAPK signaling pathway;K04434//mitogen-activated protein kinase 8 interacting protein 1+ko04010//MAPK signaling pathway;K04434//mitogen-activated protein kinase 8 interacting protein 1+ko04010//MAPK signaling pathway;K04434//mitogen-activated protein kinase 8 interacting protein 1+ko04010//MAPK signaling pathway
Unigene7625_All	ko04916//Melanogenesis;ko00350//Tyrosine metabolism;ko01100//Metabolic pathways	Global and overview maps;Amino acid metabolism;Endocrine system	Metabolism;Organismal Systems	Novel_gene	2386	113.08	37.01	6.58	8.34	16.25	21.39	-1.77891	0	0		phenoloxidase 2-like [Myzus persicae] >XP_022177165.1 phenoloxidase 2-like [Myzus persicae]	Hemocyanin, ig-like domain		Phenoloxidase 2 OS=Drosophila melanogaster GN=PPO2 PE=1 SV=1	GO:0046872//metal ion binding;GO:0016491//oxidoreductase activity		K00505//tyrosinase [EC:1.14.18.1]+ko04916//Melanogenesis+ko00350//Tyrosine metabolism+ko01100//Metabolic pathways;K00505//tyrosinase [EC:1.14.18.1]+ko04916//Melanogenesis+ko00350//Tyrosine metabolism+ko01100//Metabolic pathways;K00505//tyrosinase [EC:1.14.18.1]+ko04916//Melanogenesis+ko00350//Tyrosine metabolism+ko01100//Metabolic pathways;K00505//tyrosinase [EC:1.14.18.1]+ko04916//Melanogenesis+…
Unigene8232_All	ko00511//Other glycan degradation;ko04142//Lysosome;ko04146//Peroxisome	Transport and catabolism;Glycan biosynthesis and metabolism	Metabolism;Cellular Processes	Novel_gene	1628	24.92	5.65	1.21	1.41	2.11	1.29	-2.7264	1.63278e-237	1.25476e-238		putative prophenoloxidase activating factor, partial [Maconellicoccus hirsutus]	Trypsin	[E] KOG3627 Trypsin	Transmembrane protease serine 9 OS=Mus musculus GN=Tmprss9 PE=3 SV=1			K01362//ovochymase [EC:3.4.21.-];K01362//ovochymase [EC:3.4.21.-];K09640//transmembrane protease serine 9 [EC:3.4.21.-];K12311//lysosomal alpha-mannosidase [EC:3.2.1.24]+ko04142//Lysosome+ko00511//Other glycan degradation;K13335//peroxin-16+ko04146//Peroxisome
Unigene8439_All	ko05146//Amoebiasis;ko05226//Gastric cancer;ko04151//PI3K-Akt signaling pathway;ko05132//Salmonella infection	Infectious diseases: Bacterial;Signal transduction;Infectious diseases: Parasitic;Cancers: Specific types	Human Diseases;Environmental Information Processing	Novel_gene	1466	5.84	5.22	4.27	2.29	2.04	2.2	-1.2265	3.01705e-36	1.2993e-36		cement precursor protein 3B variant 1 [Phragmatopoma californica]		[Y] KOG2992 Nucleolar GTPase/ATPase p130	Vitellogenin-A1 OS=Aedes aegypti GN=VGA1 PE=1 SV=2			K10955//mucin-2+ko05226//Gastric cancer+ko05146//Amoebiasis;K06071//protein kinase N [EC:2.7.11.13]+ko05132//Salmonella infection+ko04151//PI3K-Akt signaling pathway
Unigene844_All	ko00270//Cysteine and methionine metabolism;ko01230//Biosynthesis of amino acids;ko01100//Metabolic pathways;ko00450//Selenocompound metabolism;ko00260//Glycine, serine and threonine metabolism	Global and overview maps;Metabolism of other amino acids;Amino acid metabolism	Metabolism	Novel_gene	1128	3.45	2.25	4.4	2.04	1.12	1.26	-1.1761	1.00703e-17	7.12911e-18		PREDICTED: putative cystathionine gamma-lyase 2 isoform X1 [Bemisia tabaci] >XP_018904038.1 PREDICTED: putative cystathionine gamma-lyase 2 isoform X1 [Bemisia tabaci]	Cys/Met metabolism PLP-dependent enzyme	[E] KOG0053 Cystathionine beta-lyases/cystathionine gamma-synthases	Cystathionine gamma-lyase OS=Sus scrofa GN=CTH PE=2 SV=1	GO:0004123//cystathionine gamma-lyase activity;GO:0019346//transsulfuration;GO:0071266//'de novo' L-methionine biosynthetic process;GO:0005737//cytoplasm;GO:0003962//cystathionine gamma-synthase activity;GO:0016829//lyase activity;GO:0019343//cysteine biosynthetic process via cystathionine;GO:0030170//pyridoxal phosphate binding		K01758//cystathionine gamma-lyase [EC:4.4.1.1]+ko01230//Biosynthesis of amino acids+ko00260//Glycine, serine and threonine metabolism+ko01100//Metabolic pathways+ko00450//Selenocompound metabolism+ko00270//Cysteine and methionine metabolism;K01758//cystathionine gamma-lyase [EC:4.4.1.1]+ko01230//Biosynthesis of amino acids+ko00260//Glycine, serine and threonine metabolism+ko01100//Metabolic pathw…
Unigene8675_All	ko05226//Gastric cancer;ko05146//Amoebiasis	Cancers: Specific types;Infectious diseases: Parasitic	Human Diseases	Novel_gene	840	12.24	29.1	25.14	1.57	1.72	1.82	-3.69542	0	0		PREDICTED: integumentary mucin C.1-like, partial [Biomphalaria glabrata]			Protein qua-1 OS=Caenorhabditis elegans GN=qua-1 PE=2 SV=1	GO:0008061//chitin binding;GO:0006030//chitin metabolic process;GO:0005576//extracellular region		K10955//mucin-2+ko05226//Gastric cancer+ko05146//Amoebiasis;K10955//mucin-2+ko05226//Gastric cancer+ko05146//Amoebiasis
Unigene8697_All	ko05322//Systemic lupus erythematosus;ko05034//Alcoholism;ko05203//Viral carcinogenesis	Substance dependence;Cancers: Overview;Immune diseases	Human Diseases	Novel_gene	419	32.64	28.44	22.61	9.63	7.93	12.15	-1.47367	2.20192e-61	6.1558e-62	AJ492925.1 Mytilus edulis h4 gene for histone H4 and h3 gene for histone H3, cluster UW27	PREDICTED: uncharacterized protein LOC105999998 [Dipodomys ordii]	Centromere kinetochore component CENP-T histone fold	[B] KOG3467 Histone H4	Histone H4 OS=Acrolepiopsis assectella GN=His4 PE=3 SV=2	GO:0003677//DNA binding;GO:0005634//nucleus;GO:0006334//nucleosome assembly;GO:0046982//protein heterodimerization activity;GO:0006352//DNA-templated transcription, initiation;GO:0000786//nucleosome		K11254//histone H4+ko05322//Systemic lupus erythematosus+ko05034//Alcoholism+ko05203//Viral carcinogenesis;K11254//histone H4+ko05322//Systemic lupus erythematosus+ko05034//Alcoholism+ko05203//Viral carcinogenesis;K11254//histone H4+ko05322//Systemic lupus erythematosus+ko05034//Alcoholism+ko05203//Viral carcinogenesis;K11254//histone H4+ko05322//Systemic lupus erythematosus+ko05034//Alcoholism+k…
Unigene8939_All	ko04977//Vitamin digestion and absorption;ko04975//Fat digestion and absorption;ko04972//Pancreatic secretion;ko00561//Glycerolipid metabolism;ko01100//Metabolic pathways	Global and overview maps;Lipid metabolism;Digestive system	Organismal Systems;Metabolism	Novel_gene	775	5.06	2.96	2.5	1.1	1.79	2.13	-1.06663	4.41373e-11	4.11677e-11		PREDICTED: uncharacterized protein LOC108694492 [Atta colombica]	Lipase	[MOI] TWOG0490 Vitellogenin/Lipoprotein lipase/Triacylglyerol lipase	Pancreatic triacylglycerol lipase OS=Cavia porcellus GN=PNLIP PE=2 SV=1			K19404//phosphatidic acid-selective phospholipase A1 [EC:3.1.1.-];K19404//phosphatidic acid-selective phospholipase A1 [EC:3.1.1.-];K14073//pancreatic triacylglycerol lipase [EC:3.1.1.3]+ko04975//Fat digestion and absorption+ko04977//Vitamin digestion and absorption+ko04972//Pancreatic secretion+ko00561//Glycerolipid metabolism+ko01100//Metabolic pathways;K14073//pancreatic triacylglycerol lipase…
[truncated: 5 more rows]
