# Supplementary material for: De Novo Transcription Responses Describe Host-Related Differentiation of Paracoccus marginatus (Hemiptera: Pseudococcidae)
Source: Insects. 2022 Sep 19;13(9):850. doi: 10.3390/insects13090850 (PMC9502998; doi:10.3390/insects13090850)
Supplement: Supplementary file 1 [file insects-13-00850-s001.zip › Table S6. GO enrichment results of DEGs.xlsx]

## Sheet: GO 富集152335
GO Term ID	GO Term	Level 1	Level 2	Term Candidate Gene Num	Total Candidate Gene Num	Term Gene Num	Total Gene Num	Rich Ratio	P value	Q value
GO:0000786	nucleosome	cellular_component	organelle part	8	118	29	4545	0.275862	4.42894e-07	0.000108952
GO:0003682	chromatin binding	molecular_function	binding	8	144	41	5863	0.195122	5.24648e-06	0.000430211
GO:0046982	protein heterodimerization activity	molecular_function	binding	8	144	41	5863	0.195122	5.24648e-06	0.000430211
GO:0003878	ATP citrate synthase activity	molecular_function	catalytic activity	3	144	3	5863	1	1.45161e-05	0.000672597
GO:0006085	acetyl-CoA biosynthetic process	biological_process	cellular process	3	109	3	3798	1	2.30098e-05	0.000672597
GO:0006101	citrate metabolic process	biological_process	cellular process	3	109	3	3798	1	2.30098e-05	0.000672597
GO:0006334	nucleosome assembly	biological_process	cellular component organization or biogenesis	6	109	20	3798	0.3	1.36007e-05	0.000672597
GO:0010468	regulation of gene expression	biological_process	biological regulation	7	109	32	3798	0.21875	2.46072e-05	0.000672597
GO:0019887	protein kinase regulator activity	molecular_function	molecular function regulator	4	144	8	5863	0.5	2.26347e-05	0.000672597
GO:0005956	protein kinase CK2 complex	cellular_component	cell	4	118	8	4545	0.5	2.78966e-05	0.000686257
GO:0016798	hydrolase activity, acting on glycosyl bonds	molecular_function	catalytic activity	3	144	6	5863	0.5	0.000274903	0.0056355
GO:0017176	phosphatidylinositol N-acetylglucosaminyltransferase activity	molecular_function	catalytic activity	3	144	6	5863	0.5	0.000274903	0.0056355
GO:0005615	extracellular space	cellular_component	extracellular region	6	118	40	4545	0.15	0.000502828	0.00883541
GO:0070991	medium-chain-acyl-CoA dehydrogenase activity	molecular_function	catalytic activity	3	144	7	5863	0.428571	0.000472426	0.00883541
GO:0008936	nicotinamidase activity	molecular_function	catalytic activity	2	144	2	5863	1	0.000599146	0.009826
GO:0048037	cofactor binding	molecular_function	binding	3	144	8	5863	0.375	0.000742302	0.0114129
GO:0006769	nicotinamide metabolic process	biological_process	cellular process	2	109	2	3798	1	0.000816309	0.0118125
GO:0008441	3'(2'),5'-bisphosphate nucleotidase activity	molecular_function	catalytic activity	2	144	3	5863	0.666667	0.00176841	0.0228962
GO:0030515	snoRNA binding	molecular_function	binding	2	144	3	5863	0.666667	0.00176841	0.0228962
GO:0034457	Mpp10 complex	cellular_component	organelle part	2	118	3	4545	0.666667	0.00197133	0.0242474
GO:0004867	serine-type endopeptidase inhibitor activity	molecular_function	molecular function regulator	4	144	24	5863	0.166667	0.00252936	0.0296297
GO:0006635	fatty acid beta-oxidation	biological_process	cellular process	3	109	11	3798	0.272727	0.00320746	0.0358652
GO:0006261	DNA-dependent DNA replication	biological_process	cellular process	2	109	4	3798	0.5	0.0047157	0.0504375
GO:0006506	GPI anchor biosynthetic process	biological_process	cellular process	3	109	13	3798	0.230769	0.00533152	0.0524622
GO:0008152	metabolic process	biological_process	metabolic process	11	109	158	3798	0.0696203	0.00511929	0.0524622
GO:0035861	site of double-strand break	cellular_component	organelle part	2	118	5	4545	0.4	0.00634997	0.0600805
GO:0003995	acyl-CoA dehydrogenase activity	molecular_function	catalytic activity	3	144	17	5863	0.176471	0.00766376	0.0647446
GO:0006352	DNA-templated transcription, initiation	biological_process	cellular process	3	109	15	3798	0.2	0.00813491	0.0647446
GO:0030060	L-malate dehydrogenase activity	molecular_function	catalytic activity	2	144	6	5863	0.333333	0.00842207	0.0647446
GO:0035019	somatic stem cell population maintenance	biological_process	multicellular organismal process	2	109	5	3798	0.4	0.00771247	0.0647446
GO:0036402	proteasome-activating ATPase activity	molecular_function	catalytic activity	2	144	6	5863	0.333333	0.00842207	0.0647446
GO:0071168	protein localization to chromatin	biological_process	localization	2	109	5	3798	0.4	0.00771247	0.0647446
GO:0035267	NuA4 histone acetyltransferase complex	cellular_component	organelle part	2	118	6	4545	0.333333	0.00936379	0.0698028
GO:0006108	malate metabolic process	biological_process	cellular process	2	109	6	3798	0.333333	0.0113527	0.0792798
GO:0036098	male germ-line stem cell population maintenance	biological_process	multicellular organismal process	2	109	6	3798	0.333333	0.0113527	0.0792798
GO:0046923	ER retention sequence binding	molecular_function	binding	2	144	7	5863	0.285714	0.0116019	0.0792798
GO:0005701	polytene chromosome chromocenter	cellular_component	organelle part	2	118	7	4545	0.285714	0.012888	0.0856875
GO:0006621	protein retention in ER lumen	biological_process	biological regulation	2	109	7	3798	0.285714	0.0155978	0.0952322
GO:0008483	transaminase activity	molecular_function	catalytic activity	2	144	8	5863	0.25	0.0152218	0.0952322
GO:0015020	glucuronosyltransferase activity	molecular_function	catalytic activity	4	144	39	5863	0.102564	0.0147411	0.0952322
GO:0016717	oxidoreductase activity, acting on paired donors, with oxidation of a pair of donors resulting in the reduction of molecular oxygen to two molecules of water	molecular_function	catalytic activity	3	144	22	5863	0.136364	0.015872	0.0952322
GO:0000275	mitochondrial proton-transporting ATP synthase complex, catalytic core F(1)	cellular_component	organelle part	1	118	1	4545	1	0.0259626	0.115738
GO:0002143	tRNA wobble position uridine thiolation	biological_process	cellular process	1	109	1	3798	1	0.0286993	0.115738
GO:0003962	cystathionine gamma-synthase activity	molecular_function	catalytic activity	2	144	11	5863	0.181818	0.0284935	0.115738
GO:0004123	cystathionine gamma-lyase activity	molecular_function	catalytic activity	2	144	11	5863	0.181818	0.0284935	0.115738
GO:0004747	ribokinase activity	molecular_function	catalytic activity	1	144	1	5863	1	0.0245608	0.115738
GO:0004792	thiosulfate sulfurtransferase activity	molecular_function	catalytic activity	1	144	1	5863	1	0.0245608	0.115738
GO:0005811	lipid droplet	cellular_component	cell	1	118	1	4545	1	0.0259626	0.115738
GO:0006633	fatty acid biosynthetic process	biological_process	cellular process	5	109	59	3798	0.0847458	0.0260021	0.115738
GO:0008108	UDP-glucose:hexose-1-phosphate uridylyltransferase activity	molecular_function	catalytic activity	1	144	1	5863	1	0.0245608	0.115738
GO:0016829	lyase activity	molecular_function	catalytic activity	2	144	11	5863	0.181818	0.0284935	0.115738
GO:0018192	enzyme active site formation via cysteine modification to L-cysteine persulfide	biological_process	cellular process	1	109	1	3798	1	0.0286993	0.115738
GO:0019303	D-ribose catabolic process	biological_process	metabolic process	1	109	1	3798	1	0.0286993	0.115738
GO:0030170	pyridoxal phosphate binding	molecular_function	binding	4	144	47	5863	0.0851064	0.0275161	0.115738
GO:0032040	small-subunit processome	cellular_component	cell	2	118	9	4545	0.222222	0.0213561	0.115738
GO:0033499	galactose catabolic process via UDP-galactose	biological_process	metabolic process	1	109	1	3798	1	0.0286993	0.115738
GO:0042246	tissue regeneration	biological_process	growth	1	109	1	3798	1	0.0286993	0.115738
GO:0042406	extrinsic component of endoplasmic reticulum membrane	cellular_component	organelle part	1	118	1	4545	1	0.0259626	0.115738
GO:0046854	phosphatidylinositol phosphorylation	biological_process	cellular process	2	109	8	3798	0.25	0.0204106	0.115738
GO:0061604	molybdopterin-synthase sulfurtransferase activity	molecular_function	catalytic activity	1	144	1	5863	1	0.0245608	0.115738
GO:0061605	molybdopterin-synthase adenylyltransferase activity	molecular_function	catalytic activity	1	144	1	5863	1	0.0245608	0.115738
GO:0008622	epsilon DNA polymerase complex	cellular_component	organelle part	2	118	11	4545	0.181818	0.0315426	0.123387
GO:0030163	protein catabolic process	biological_process	metabolic process	2	109	10	3798	0.2	0.031599	0.123387
GO:0004602	glutathione peroxidase activity	molecular_function	antioxidant activity	2	144	12	5863	0.166667	0.0336497	0.129341
GO:0019343	cysteine biosynthetic process via cystathionine	biological_process	cellular process	2	109	11	3798	0.181818	0.0379083	0.139186
GO:0019346	transsulfuration	biological_process	cellular process	2	109	11	3798	0.181818	0.0379083	0.139186
GO:0071266	'de novo' L-methionine biosynthetic process	biological_process	cellular process	2	109	11	3798	0.181818	0.0379083	0.139186
GO:0045454	cell redox homeostasis	biological_process	biological regulation	4	109	45	3798	0.0888889	0.0388116	0.140407
GO:0000176	nuclear exosome (RNase complex)	cellular_component	organelle part	1	118	2	4545	0.5	0.0512567	0.159991
GO:0003824	catalytic activity	molecular_function	catalytic activity	7	144	138	5863	0.0507246	0.0526233	0.159991
GO:0004109	coproporphyrinogen oxidase activity	molecular_function	catalytic activity	1	144	2	5863	0.5	0.0485225	0.159991
GO:0004615	phosphomannomutase activity	molecular_function	catalytic activity	2	144	14	5863	0.142857	0.0449395	0.159991
GO:0005623	cell	cellular_component	cell	4	118	56	4545	0.0714286	0.0564073	0.159991
GO:0005688	U6 snRNP	cellular_component	organelle part	1	118	2	4545	0.5	0.0512567	0.159991
GO:0005737	cytoplasm	cellular_component	cell	15	118	367	4545	0.0408719	0.0509824	0.159991
GO:0006974	cellular response to DNA damage stimulus	biological_process	cellular process	2	109	13	3798	0.153846	0.0518016	0.159991
GO:0007220	Notch receptor processing	biological_process	cellular process	1	109	2	3798	0.5	0.0565823	0.159991
GO:0010025	wax biosynthetic process	biological_process	metabolic process	1	109	2	3798	0.5	0.0565823	0.159991
GO:0016049	cell growth	biological_process	cellular process	1	109	2	3798	0.5	0.0565823	0.159991
GO:0016301	kinase activity	molecular_function	catalytic activity	5	144	81	5863	0.0617284	0.0482431	0.159991
GO:0030177	positive regulation of Wnt signaling pathway	biological_process	biological regulation	1	109	2	3798	0.5	0.0565823	0.159991
GO:0030307	positive regulation of cell growth	biological_process	biological regulation	1	109	2	3798	0.5	0.0565823	0.159991
GO:0043154	negative regulation of cysteine-type endopeptidase activity involved in apoptotic process	biological_process	biological regulation	1	109	2	3798	0.5	0.0565823	0.159991
GO:0048511	rhythmic process	biological_process	rhythmic process	1	109	2	3798	0.5	0.0565823	0.159991
GO:0060570	negative regulation of peptide hormone processing	biological_process	biological regulation	1	109	2	3798	0.5	0.0565823	0.159991
GO:0070765	gamma-secretase complex	cellular_component	cell	1	118	2	4545	0.5	0.0512567	0.159991
GO:1905818	regulation of chromosome separation	biological_process	biological regulation	1	109	2	3798	0.5	0.0565823	0.159991
GO:0016747	transferase activity, transferring acyl groups other than amino-acyl groups	molecular_function	catalytic activity	3	144	36	5863	0.0833333	0.0574641	0.160638
GO:0006099	tricarboxylic acid cycle	biological_process	cellular process	3	109	32	3798	0.09375	0.0624629	0.17265
GO:0019843	rRNA binding	molecular_function	binding	2	144	17	5863	0.117647	0.064041	0.175045
GO:0050790	regulation of catalytic activity	biological_process	biological regulation	2	109	15	3798	0.133333	0.0672035	0.181671
GO:0001784	phosphotyrosine residue binding	molecular_function	binding	1	144	3	5863	0.333333	0.0718995	0.188162
GO:0016868	intramolecular transferase activity, phosphotransferases	molecular_function	catalytic activity	1	144	3	5863	0.333333	0.0718995	0.188162
GO:0050660	flavin adenine dinucleotide binding	molecular_function	binding	4	144	64	5863	0.0625	0.0715303	0.188162
GO:0004177	aminopeptidase activity	molecular_function	catalytic activity	2	144	19	5863	0.105263	0.0780206	0.196032
GO:0005789	endoplasmic reticulum membrane	cellular_component	organelle part	3	118	39	4545	0.0769231	0.0793718	0.196032
GO:0006629	lipid metabolic process	biological_process	metabolic process	5	109	81	3798	0.0617284	0.081578	0.196032
GO:0006779	porphyrin-containing compound biosynthetic process	biological_process	cellular process	1	109	3	3798	0.333333	0.083672	0.196032
GO:0008283	cell proliferation	biological_process	cell proliferation	1	109	3	3798	0.333333	0.083672	0.196032
GO:0010508	positive regulation of autophagy	biological_process	biological regulation	1	109	3	3798	0.333333	0.083672	0.196032
GO:0023051	regulation of signaling	biological_process	biological regulation	1	109	3	3798	0.333333	0.083672	0.196032
GO:0031929	TOR signaling	biological_process	biological regulation	1	109	3	3798	0.333333	0.083672	0.196032
GO:0031931	TORC1 complex	cellular_component	cell	1	118	3	4545	0.333333	0.0758994	0.196032
GO:0032367	intracellular cholesterol transport	biological_process	localization	1	109	3	3798	0.333333	0.083672	0.196032
GO:0045732	positive regulation of protein catabolic process	biological_process	biological regulation	1	109	3	3798	0.333333	0.083672	0.196032
GO:0003887	DNA-directed DNA polymerase activity	molecular_function	catalytic activity	2	144	20	5863	0.1	0.0853366	0.198045
GO:0000062	fatty-acyl-CoA binding	molecular_function	binding	1	144	4	5863	0.25	0.0947061	0.209889
GO:0004639	phosphoribosylaminoimidazolesuccinocarboxamide synthase activity	molecular_function	catalytic activity	1	144	4	5863	0.25	0.0947061	0.209889
GO:0004869	cysteine-type endopeptidase inhibitor activity	molecular_function	molecular function regulator	1	144	4	5863	0.25	0.0947061	0.209889
GO:0043140	ATP-dependent 3'-5' DNA helicase activity	molecular_function	catalytic activity	1	144	4	5863	0.25	0.0947061	0.209889
GO:0051213	dioxygenase activity	molecular_function	catalytic activity	2	144	21	5863	0.0952381	0.0928505	0.209889
GO:0000178	exosome (RNase complex)	cellular_component	cell	1	118	4	4545	0.25	0.0999073	0.219439
GO:0009298	GDP-mannose biosynthetic process	biological_process	cellular process	2	109	19	3798	0.105263	0.101704	0.221409
GO:0003677	DNA binding	molecular_function	binding	12	144	327	5863	0.0366972	0.105246	0.227109
GO:0006662	glycerol ether metabolic process	biological_process	metabolic process	1	109	4	3798	0.25	0.109991	0.233256
GO:0006777	Mo-molybdopterin cofactor biosynthetic process	biological_process	cellular process	1	109	4	3798	0.25	0.109991	0.233256
GO:0004197	cysteine-type endopeptidase activity	molecular_function	catalytic activity	2	144	24	5863	0.0833333	0.116443	0.237778
GO:0008641	ubiquitin-like modifier activating enzyme activity	molecular_function	catalytic activity	1	144	5	5863	0.2	0.116956	0.237778
GO:0019135	deoxyhypusine monooxygenase activity	molecular_function	catalytic activity	1	144	5	5863	0.2	0.116956	0.237778
GO:0019888	protein phosphatase regulator activity	molecular_function	molecular function regulator	1	144	5	5863	0.2	0.116956	0.237778
GO:0033925	mannosyl-glycoprotein endo-beta-N-acetylglucosaminidase activity	molecular_function	catalytic activity	1	144	5	5863	0.2	0.116956	0.237778
GO:0006364	rRNA processing	biological_process	cellular component organization or biogenesis	2	109	21	3798	0.0952381	0.120434	0.242843
GO:0000159	protein phosphatase type 2A complex	cellular_component	cell	1	118	5	4545	0.2	0.123297	0.244605
GO:0046540	U4/U6 x U5 tri-snRNP complex	cellular_component	organelle part	1	118	5	4545	0.2	0.123297	0.244605
GO:0015075	ion transmembrane transporter activity	molecular_function	transporter activity	1	144	6	5863	0.166667	0.138663	0.272888
GO:0008234	cysteine-type peptidase activity	molecular_function	catalytic activity	2	144	27	5863	0.0740741	0.141345	0.27596
GO:0004722	protein serine/threonine phosphatase activity	molecular_function	catalytic activity	1	144	7	5863	0.142857	0.15984	0.30353
GO:0006468	protein phosphorylation	biological_process	cellular process	1	109	6	3798	0.166667	0.160402	0.30353
GO:0008284	positive regulation of cell proliferation	biological_process	biological regulation	1	109	6	3798	0.166667	0.160402	0.30353
GO:0045087	innate immune response	biological_process	response to stimulus	1	109	6	3798	0.166667	0.160402	0.30353
GO:0004499	N,N-dimethylaniline monooxygenase activity	molecular_function	catalytic activity	1	144	8	5863	0.125	0.180499	0.336385
GO:0004713	protein tyrosine kinase activity	molecular_function	catalytic activity	1	144	8	5863	0.125	0.180499	0.336385
GO:0006606	protein import into nucleus	biological_process	localization	1	109	7	3798	0.142857	0.184536	0.338775
GO:0016055	Wnt signaling pathway	biological_process	biological regulation	1	109	7	3798	0.142857	0.184536	0.338775
GO:0004674	protein serine/threonine kinase activity	molecular_function	catalytic activity	3	144	61	5863	0.0491803	0.188413	0.340694
GO:0006979	response to oxidative stress	biological_process	response to stimulus	2	109	28	3798	0.0714286	0.191122	0.340694
GO:0102336	3-oxo-arachidoyl-CoA synthase activity	molecular_function	catalytic activity	2	144	33	5863	0.0606061	0.193891	0.340694
GO:0102337	3-oxo-cerotoyl-CoA synthase activity	molecular_function	catalytic activity	2	144	33	5863	0.0606061	0.193891	0.340694
GO:0102338	3-oxo-lignoceronyl-CoA synthase activity	molecular_function	catalytic activity	2	144	33	5863	0.0606061	0.193891	0.340694
GO:0102756	very-long-chain 3-ketoacyl-CoA synthase activity	molecular_function	catalytic activity	2	144	33	5863	0.0606061	0.193891	0.340694
GO:0003724	RNA helicase activity	molecular_function	catalytic activity	1	144	9	5863	0.111111	0.200654	0.345182
GO:0008233	peptidase activity	molecular_function	catalytic activity	1	144	9	5863	0.111111	0.200654	0.345182
GO:0046933	proton-transporting ATP synthase activity, rotational mechanism	molecular_function	transporter activity	1	144	9	5863	0.111111	0.200654	0.345182
GO:0004449	isocitrate dehydrogenase (NAD+) activity	molecular_function	catalytic activity	1	144	10	5863	0.1	0.220317	0.350414
GO:0006189	'de novo' IMP biosynthetic process	biological_process	cellular process	1	109	9	3798	0.111111	0.230761	0.350414
GO:0006310	DNA recombination	biological_process	cellular process	2	109	31	3798	0.0645161	0.222909	0.350414
GO:0006401	RNA catabolic process	biological_process	cellular process	1	109	9	3798	0.111111	0.230761	0.350414
GO:0006487	protein N-linked glycosylation	biological_process	cellular process	1	109	8	3798	0.125	0.207982	0.350414
GO:0007367	segment polarity determination	biological_process	multicellular organismal process	1	109	9	3798	0.111111	0.230761	0.350414
GO:0008237	metallopeptidase activity	molecular_function	catalytic activity	2	144	35	5863	0.0571429	0.211939	0.350414
GO:0008378	galactosyltransferase activity	molecular_function	catalytic activity	1	144	10	5863	0.1	0.220317	0.350414
GO:0008612	peptidyl-lysine modification to peptidyl-hypusine	biological_process	cellular process	1	109	8	3798	0.125	0.207982	0.350414
GO:0015031	protein transport	biological_process	localization	2	109	31	3798	0.0645161	0.222909	0.350414
GO:0015035	protein disulfide oxidoreductase activity	molecular_function	catalytic activity	1	144	10	5863	0.1	0.220317	0.350414
GO:0016020	membrane	cellular_component	membrane	3	118	63	4545	0.047619	0.223893	0.350414
GO:0031648	protein destabilization	biological_process	biological regulation	1	109	9	3798	0.111111	0.230761	0.350414
GO:0042067	establishment of ommatidial planar polarity	biological_process	cellular process	1	109	9	3798	0.111111	0.230761	0.350414
GO:0042308	negative regulation of protein import into nucleus	biological_process	biological regulation	1	109	9	3798	0.111111	0.230761	0.350414
GO:0045047	protein targeting to ER	biological_process	localization	1	109	8	3798	0.125	0.207982	0.350414
GO:0046330	positive regulation of JNK cascade	biological_process	biological regulation	1	109	9	3798	0.111111	0.230761	0.350414
GO:0051603	proteolysis involved in cellular protein catabolic process	biological_process	cellular process	1	109	9	3798	0.111111	0.230761	0.350414
GO:1901044	protein polyubiquitination involved in nucleus-associated proteasomal ubiquitin-dependent protein catabolic process	biological_process	cellular process	1	109	9	3798	0.111111	0.230761	0.350414
GO:0005815	microtubule organizing center	cellular_component	organelle part	1	118	11	4545	0.0909091	0.2515	0.37725
GO:0031966	mitochondrial membrane	cellular_component	organelle part	1	118	11	4545	0.0909091	0.2515	0.37725
GO:0080019	fatty-acyl-CoA reductase (alcohol-forming) activity	molecular_function	catalytic activity	2	144	40	5863	0.05	0.257623	0.381779
GO:0102965	alcohol-forming fatty acyl-CoA reductase activity	molecular_function	catalytic activity	2	144	40	5863	0.05	0.257623	0.381779
GO:0046331	lateral inhibition	biological_process	cellular process	1	109	11	3798	0.0909091	0.274388	0.401782
GO:0051865	protein autoubiquitination	biological_process	cellular process	1	109	11	3798	0.0909091	0.274388	0.401782
GO:0004601	peroxidase activity	molecular_function	antioxidant activity	1	144	13	5863	0.0769231	0.276469	0.402435
GO:0000028	ribosomal small subunit assembly	biological_process	cellular component organization or biogenesis	1	109	12	3798	0.0833333	0.295273	0.408074
GO:0005764	lysosome	cellular_component	cell	1	118	13	4545	0.0769231	0.289958	0.408074
GO:0006013	mannose metabolic process	biological_process	metabolic process	1	109	12	3798	0.0833333	0.295273	0.408074
GO:0006741	NADP biosynthetic process	biological_process	cellular process	1	109	12	3798	0.0833333	0.295273	0.408074
GO:0007156	homophilic cell adhesion via plasma membrane adhesion molecules	biological_process	biological adhesion	1	109	12	3798	0.0833333	0.295273	0.408074
GO:0008408	3'-5' exonuclease activity	molecular_function	catalytic activity	1	144	14	5863	0.0714286	0.294279	0.408074
GO:0019674	NAD metabolic process	biological_process	cellular process	1	109	12	3798	0.0833333	0.295273	0.408074
GO:0043065	positive regulation of apoptotic process	biological_process	biological regulation	1	109	12	3798	0.0833333	0.295273	0.408074
GO:0045879	negative regulation of smoothened signaling pathway	biological_process	biological regulation	1	109	12	3798	0.0833333	0.295273	0.408074
GO:0030162	regulation of proteolysis	biological_process	biological regulation	2	109	38	3798	0.0526316	0.298094	0.409671
GO:0005975	carbohydrate metabolic process	biological_process	metabolic process	5	109	127	3798	0.0393701	0.299835	0.409775
GO:0003951	NAD+ kinase activity	molecular_function	catalytic activity	1	144	18	5863	0.0555556	0.361269	0.488309
GO:0042803	protein homodimerization activity	molecular_function	binding	1	144	18	5863	0.0555556	0.361269	0.488309
GO:0007155	cell adhesion	biological_process	biological adhesion	1	109	16	3798	0.0625	0.373022	0.501315
GO:0008565	protein transporter activity	molecular_function	transporter activity	1	144	19	5863	0.0526316	0.377005	0.501315
GO:0050661	NADP binding	molecular_function	binding	1	144	19	5863	0.0526316	0.377005	0.501315
GO:0016740	transferase activity	molecular_function	catalytic activity	2	144	56	5863	0.0357143	0.401858	0.531489
GO:0004721	phosphoprotein phosphatase activity	molecular_function	catalytic activity	1	144	21	5863	0.047619	0.407332	0.535848
GO:0005524	ATP binding	molecular_function	binding	17	144	644	5863	0.0263975	0.414315	0.542136
GO:0007049	cell cycle	biological_process	cellular process	1	109	19	3798	0.0526316	0.425698	0.554083
GO:0005829	cytosol	cellular_component	cell	2	118	56	4545	0.0357143	0.429569	0.556179
GO:0006396	RNA processing	biological_process	cellular process	2	109	51	3798	0.0392157	0.433235	0.557989
GO:0003777	microtubule motor activity	molecular_function	catalytic activity	1	144	23	5863	0.0434783	0.436192	0.55887
GO:0070062	extracellular exosome	cellular_component	extracellular region	1	118	22	4545	0.0454545	0.440147	0.561017
GO:0008484	sulfuric ester hydrolase activity	molecular_function	catalytic activity	1	144	24	5863	0.0416667	0.450094	0.570737
GO:0005739	mitochondrion	cellular_component	cell	3	118	96	4545	0.03125	0.457195	0.57677
GO:0016491	oxidoreductase activity	molecular_function	catalytic activity	4	144	142	5863	0.028169	0.463246	0.581421
GO:0022627	cytosolic small ribosomal subunit	cellular_component	organelle part	1	118	24	4545	0.0416667	0.468981	0.585631
GO:0009058	biosynthetic process	biological_process	metabolic process	2	109	55	3798	0.0363636	0.472152	0.585932
GO:0015986	ATP synthesis coupled proton transport	biological_process	cellular process	1	109	22	3798	0.0454545	0.473985	0.585932
GO:0000166	nucleotide binding	molecular_function	binding	1	144	27	5863	0.037037	0.48979	0.592102
GO:0000398	mRNA splicing, via spliceosome	biological_process	cellular process	1	109	23	3798	0.0434783	0.48917	0.592102
GO:0005509	calcium ion binding	molecular_function	binding	4	144	146	5863	0.0273973	0.484857	0.592102
GO:0006260	DNA replication	biological_process	cellular process	2	109	57	3798	0.0350877	0.491012	0.592102
GO:0006397	mRNA processing	biological_process	cellular process	1	109	23	3798	0.0434783	0.48917	0.592102
GO:0007018	microtubule-based movement	biological_process	cellular process	1	109	24	3798	0.0416667	0.503919	0.601768
GO:0042302	structural constituent of cuticle	molecular_function	structural molecule activity	1	144	28	5863	0.0357143	0.502379	0.601768
GO:0004871	signal transducer activity	molecular_function	signal transducer activity	1	144	29	5863	0.0344828	0.51466	0.611625
GO:0004842	ubiquitin-protein transferase activity	molecular_function	catalytic activity	1	144	30	5863	0.0333333	0.52664	0.619872
GO:0008289	lipid binding	molecular_function	binding	1	144	30	5863	0.0333333	0.52664	0.619872
GO:0005667	transcription factor complex	cellular_component	cell	1	118	30	4545	0.0333333	0.54694	0.640701
GO:0006281	DNA repair	biological_process	cellular process	2	109	64	3798	0.03125	0.553618	0.645358
GO:0006915	apoptotic process	biological_process	cellular process	1	109	28	3798	0.0357143	0.558816	0.645358
GO:0007166	cell surface receptor signaling pathway	biological_process	biological regulation	1	109	28	3798	0.0357143	0.558816	0.645358
GO:0008061	chitin binding	molecular_function	binding	2	144	76	5863	0.0263158	0.561409	0.645358
GO:0004672	protein kinase activity	molecular_function	catalytic activity	2	144	77	5863	0.025974	0.568559	0.649524
GO:0019005	SCF ubiquitin ligase complex	cellular_component	cell	1	118	32	4545	0.03125	0.570314	0.649524
GO:0000287	magnesium ion binding	molecular_function	binding	1	144	35	5863	0.0285714	0.582273	0.660088
GO:0008017	microtubule binding	molecular_function	binding	1	144	36	5863	0.0277778	0.592594	0.668707
GO:0046872	metal ion binding	molecular_function	binding	9	144	381	5863	0.023622	0.598319	0.672085
GO:0031625	ubiquitin protein ligase binding	molecular_function	binding	1	144	39	5863	0.025641	0.622063	0.695579
GO:0006030	chitin metabolic process	biological_process	cellular process	2	109	73	3798	0.0273973	0.625925	0.696731
GO:0004553	hydrolase activity, hydrolyzing O-glycosyl compounds	molecular_function	catalytic activity	1	144	40	5863	0.025	0.631407	0.699668
GO:0006486	protein glycosylation	biological_process	cellular process	1	109	36	3798	0.0277778	0.651188	0.718351
GO:0007165	signal transduction	biological_process	biological regulation	2	109	78	3798	0.025641	0.66206	0.723852
GO:0043161	proteasome-mediated ubiquitin-dependent protein catabolic process	biological_process	cellular process	1	109	37	3798	0.027027	0.661295	0.723852
GO:0005576	extracellular region	cellular_component	extracellular region	3	118	132	4545	0.0227273	0.673013	0.729344
GO:0042787	protein ubiquitination involved in ubiquitin-dependent protein catabolic process	biological_process	cellular process	1	109	38	3798	0.0263158	0.671111	0.729344
GO:0008168	methyltransferase activity	molecular_function	catalytic activity	1	144	47	5863	0.0212766	0.690698	0.745227
GO:0005634	nucleus	cellular_component	cell	15	118	636	4545	0.0235849	0.697998	0.749814
GO:0000139	Golgi membrane	cellular_component	organelle part	1	118	47	4545	0.0212766	0.711409	0.760899
GO:0004252	serine-type endopeptidase activity	molecular_function	catalytic activity	2	144	106	5863	0.0188679	0.739906	0.787952
GO:0016787	hydrolase activity	molecular_function	catalytic activity	3	144	159	5863	0.0188679	0.75529	0.800868
GO:0016874	ligase activity	molecular_function	catalytic activity	1	144	58	5863	0.0172414	0.765303	0.808002
GO:0005622	intracellular	cellular_component	cell	4	118	205	4545	0.0195122	0.787592	0.827982
GO:0006351	transcription, DNA-templated	biological_process	cellular process	3	109	145	3798	0.0206897	0.794447	0.831633
GO:0046983	protein dimerization activity	molecular_function	binding	1	144	69	5863	0.0144928	0.822007	0.856837
GO:0008270	zinc ion binding	molecular_function	binding	4	144	273	5863	0.014652	0.909597	0.944139
GO:0006355	regulation of transcription, DNA-templated	biological_process	biological regulation	2	109	139	3798	0.0143885	0.914793	0.945543
GO:0016021	integral component of membrane	cellular_component	membrane part	49	118	2224	4545	0.0220324	0.957992	0.98605
GO:0003676	nucleic acid binding	molecular_function	binding	4	144	392	5863	0.0102041	0.989256	0.997364
GO:0003700	DNA binding transcription factor activity	molecular_function	transcription regulator activity	1	144	146	5863	0.00684932	0.974698	0.997364
GO:0003735	structural constituent of ribosome	molecular_function	structural molecule activity	2	144	227	5863	0.00881057	0.978054	0.997364
GO:0005840	ribosome	cellular_component	cell	1	118	160	4545	0.00625	0.986231	0.997364
GO:0006412	translation	biological_process	cellular process	2	109	213	3798	0.00938967	0.987051	0.997364
GO:0003723	RNA binding	molecular_function	binding	2	144	303	5863	0.00660066	0.996054	0.998206
GO:0055085	transmembrane transport	biological_process	localization	1	109	211	3798	0.00473934	0.998206	0.998206
