# Supplementary material for: De Novo Transcription Responses Describe Host-Related Differentiation of Paracoccus marginatus (Hemiptera: Pseudococcidae)
Source: Insects. 2022 Sep 19;13(9):850. doi: 10.3390/insects13090850 (PMC9502998; doi:10.3390/insects13090850)
Supplement: Supplementary file 1 [file insects-13-00850-s001.zip › Table S7. KEGG pathway enrichment results of DEGs..xlsx]

## Sheet: Pathway 富集170231
Pathway ID	Pathway Name	Level 1	Level 2	Term Candidate Gene Num	Total Candidate Gene Num	Term Gene Num	Total Gene Num	Rich Ratio	P value	Q value
ko00140	Steroid hormone biosynthesis	Metabolism	Lipid metabolism	18	408	190	11182	0.0947368	0.000200755	0.0185364
ko00630	Glyoxylate and dicarboxylate metabolism	Metabolism	Carbohydrate metabolism	8	408	59	11182	0.135593	0.00127233	0.072606
ko00561	Glycerolipid metabolism	Metabolism	Lipid metabolism	21	408	295	11182	0.0711864	0.00268259	0.106154
ko00640	Propanoate metabolism	Metabolism	Carbohydrate metabolism	7	408	52	11182	0.134615	0.00264842	0.106154
ko03320	PPAR signaling pathway	Organismal Systems	Endocrine system	15	408	186	11182	0.0806452	0.00334644	0.11587
ko00830	Retinol metabolism	Metabolism	Metabolism of cofactors and vitamins	12	408	138	11182	0.0869565	0.0045712	0.138481
ko04975	Fat digestion and absorption	Organismal Systems	Digestive system	17	408	244	11182	0.0696721	0.00810115	0.204002
ko04142	Lysosome	Cellular Processes	Transport and catabolism	23	408	371	11182	0.0619946	0.0092425	0.213348
ko00020	Citrate cycle (TCA cycle)	Metabolism	Carbohydrate metabolism	7	408	68	11182	0.102941	0.0116846	0.231189
ko00982	Drug metabolism - cytochrome P450	Metabolism	Xenobiotics biodegradation and metabolism	12	408	155	11182	0.0774194	0.0112321	0.231189
ko04923	Regulation of lipolysis in adipocytes	Organismal Systems	Endocrine system	7	408	69	11182	0.101449	0.012609	0.232846
ko00053	Ascorbate and aldarate metabolism	Metabolism	Carbohydrate metabolism	11	408	141	11182	0.0780142	0.0140969	0.241133
ko00860	Porphyrin and chlorophyll metabolism	Metabolism	Metabolism of cofactors and vitamins	11	408	142	11182	0.0774648	0.0147988	0.241133
ko00040	Pentose and glucuronate interconversions	Metabolism	Carbohydrate metabolism	11	408	150	11182	0.0733333	0.0213974	0.329282
ko00300	Lysine biosynthesis	Metabolism	Amino acid metabolism	2	408	8	11182	0.25	0.0321399	0.382607
ko00350	Tyrosine metabolism	Metabolism	Amino acid metabolism	5	408	55	11182	0.0909091	0.0494669	0.382607
ko00520	Amino sugar and nucleotide sugar metabolism	Metabolism	Carbohydrate metabolism	10	408	148	11182	0.0675676	0.0444091	0.382607
ko00524	Neomycin, kanamycin and gentamicin biosynthesis	Metabolism	Biosynthesis of other secondary metabolites	2	408	8	11182	0.25	0.0321399	0.382607
ko00563	Glycosylphosphatidylinositol (GPI)-anchor biosynthesis	Metabolism	Glycan biosynthesis and metabolism	4	408	35	11182	0.114286	0.0374875	0.382607
ko00620	Pyruvate metabolism	Metabolism	Carbohydrate metabolism	7	408	88	11182	0.0795455	0.0414698	0.382607
ko00670	One carbon pool by folate	Metabolism	Metabolism of cofactors and vitamins	4	408	32	11182	0.125	0.0280212	0.382607
ko00920	Sulfur metabolism	Metabolism	Energy metabolism	3	408	23	11182	0.130435	0.0497252	0.382607
ko00980	Metabolism of xenobiotics by cytochrome P450	Metabolism	Xenobiotics biodegradation and metabolism	10	408	148	11182	0.0675676	0.0444091	0.382607
ko00981	Insect hormone biosynthesis	Metabolism	Metabolism of terpenoids and polyketides	8	408	108	11182	0.0740741	0.0436463	0.382607
ko00983	Drug metabolism - other enzymes	Metabolism	Xenobiotics biodegradation and metabolism	21	408	387	11182	0.0542636	0.0452045	0.382607
ko01200	Carbon metabolism	Metabolism	Global and overview maps	14	408	222	11182	0.0630631	0.0329441	0.382607
ko01212	Fatty acid metabolism	Metabolism	Global and overview maps	14	408	234	11182	0.0598291	0.0477767	0.382607
ko04064	NF-kappa B signaling pathway	Environmental Information Processing	Signal transduction	6	408	68	11182	0.0882353	0.0372399	0.382607
ko04136	Autophagy - other	Cellular Processes	Transport and catabolism	8	408	99	11182	0.0808081	0.0280311	0.382607
ko04140	Autophagy - animal	Cellular Processes	Transport and catabolism	17	408	299	11182	0.0568562	0.0470432	0.382607
ko04211	Longevity regulating pathway	Organismal Systems	Aging	9	408	128	11182	0.0703125	0.0444749	0.382607
ko04310	Wnt signaling pathway	Environmental Information Processing	Signal transduction	16	408	265	11182	0.0603774	0.0335617	0.382607
ko04711	Circadian rhythm - fly	Organismal Systems	Environmental adaptation	4	408	40	11182	0.1	0.0568664	0.418507
ko00052	Galactose metabolism	Metabolism	Carbohydrate metabolism	10	408	156	11182	0.0641026	0.0594539	0.422275
ko04380	Osteoclast differentiation	Organismal Systems	Development	6	408	78	11182	0.0769231	0.0648987	0.449424
ko04137	Mitophagy - animal	Cellular Processes	Transport and catabolism	7	408	107	11182	0.0654206	0.0960415	0.648866
ko00100	Steroid biosynthesis	Metabolism	Lipid metabolism	7	408	109	11182	0.0642202	0.103379	0.681806
ko00270	Cysteine and methionine metabolism	Metabolism	Amino acid metabolism	7	408	111	11182	0.0630631	0.111011	0.698865
ko00600	Sphingolipid metabolism	Metabolism	Lipid metabolism	6	408	92	11182	0.0652174	0.11939	0.710244
ko03008	Ribosome biogenesis in eukaryotes	Genetic Information Processing	Translation	10	408	179	11182	0.0558659	0.119558	0.710244
ko04657	IL-17 signaling pathway	Organismal Systems	Immune system	8	408	135	11182	0.0592593	0.120511	0.710244
ko04910	Insulin signaling pathway	Organismal Systems	Endocrine system	15	408	298	11182	0.0503356	0.129798	0.749042
ko00051	Fructose and mannose metabolism	Metabolism	Carbohydrate metabolism	5	408	77	11182	0.0649351	0.149638	0.80943
ko00061	Fatty acid biosynthesis	Metabolism	Lipid metabolism	5	408	79	11182	0.0632911	0.161338	0.80943
ko00260	Glycine, serine and threonine metabolism	Metabolism	Amino acid metabolism	7	408	122	11182	0.057377	0.158013	0.80943
ko00500	Starch and sucrose metabolism	Metabolism	Carbohydrate metabolism	7	408	123	11182	0.0569106	0.162682	0.80943
ko00511	Other glycan degradation	Metabolism	Glycan biosynthesis and metabolism	6	408	103	11182	0.0582524	0.174032	0.80943
ko00531	Glycosaminoglycan degradation	Metabolism	Glycan biosynthesis and metabolism	4	408	60	11182	0.0666667	0.17508	0.80943
ko00562	Inositol phosphate metabolism	Metabolism	Carbohydrate metabolism	7	408	123	11182	0.0569106	0.162682	0.80943
ko00564	Glycerophospholipid metabolism	Metabolism	Lipid metabolism	16	408	338	11182	0.0473373	0.173467	0.80943
ko00790	Folate biosynthesis	Metabolism	Metabolism of cofactors and vitamins	5	408	76	11182	0.0657895	0.143928	0.80943
ko01210	2-Oxocarboxylic acid metabolism	Metabolism	Global and overview maps	3	408	40	11182	0.075	0.17825	0.80943
ko04612	Antigen processing and presentation	Organismal Systems	Immune system	7	408	123	11182	0.0569106	0.162682	0.80943
ko04621	NOD-like receptor signaling pathway	Organismal Systems	Immune system	9	408	172	11182	0.0523256	0.177328	0.80943
ko04727	GABAergic synapse	Organismal Systems	Nervous system	5	408	81	11182	0.0617284	0.173394	0.80943
ko04122	Sulfur relay system	Genetic Information Processing	Folding, sorting and degradation	2	408	22	11182	0.0909091	0.190718	0.852079
ko00410	beta-Alanine metabolism	Metabolism	Metabolism of other amino acids	4	408	65	11182	0.0615385	0.212495	0.90081
ko04610	Complement and coagulation cascades	Organismal Systems	Immune system	3	408	44	11182	0.0681818	0.215872	0.90081
ko04916	Melanogenesis	Organismal Systems	Endocrine system	7	408	133	11182	0.0526316	0.212547	0.90081
ko03410	Base excision repair	Genetic Information Processing	Replication and repair	3	408	45	11182	0.0666667	0.22553	0.906996
ko04152	AMPK signaling pathway	Environmental Information Processing	Signal transduction	12	408	256	11182	0.046875	0.22593	0.906996
ko00071	Fatty acid degradation	Metabolism	Lipid metabolism	5	408	91	11182	0.0549451	0.238222	0.929403
ko04973	Carbohydrate digestion and absorption	Organismal Systems	Digestive system	4	408	68	11182	0.0588235	0.23593	0.929403
ko00440	Phosphonate and phosphinate metabolism	Metabolism	Metabolism of other amino acids	1	408	8	11182	0.125	0.257291	0.936676
ko00590	Arachidonic acid metabolism	Metabolism	Lipid metabolism	4	408	71	11182	0.056338	0.259941	0.936676
ko03018	RNA degradation	Genetic Information Processing	Folding, sorting and degradation	8	408	166	11182	0.0481928	0.260376	0.936676
ko04972	Pancreatic secretion	Organismal Systems	Digestive system	11	408	238	11182	0.0462185	0.252755	0.936676
ko04979	Cholesterol metabolism	Organismal Systems	Digestive system	8	408	165	11182	0.0484848	0.255215	0.936676
ko04640	Hematopoietic cell lineage	Organismal Systems	Immune system	4	408	72	11182	0.0555556	0.268051	0.951924
ko04917	Prolactin signaling pathway	Organismal Systems	Endocrine system	3	408	50	11182	0.06	0.274862	0.963756
ko00010	Glycolysis / Gluconeogenesis	Metabolism	Carbohydrate metabolism	5	408	101	11182	0.049505	0.308449	0.999902
ko00030	Pentose phosphate pathway	Metabolism	Carbohydrate metabolism	3	408	70	11182	0.0428571	0.473018	0.999902
ko00062	Fatty acid elongation	Metabolism	Lipid metabolism	2	408	65	11182	0.0307692	0.691845	0.999902
ko00072	Synthesis and degradation of ketone bodies	Metabolism	Lipid metabolism	1	408	19	11182	0.0526316	0.50678	0.999902
ko00073	Cutin, suberine and wax biosynthesis	Metabolism	Lipid metabolism	2	408	47	11182	0.0425532	0.515919	0.999902
ko00130	Ubiquinone and other terpenoid-quinone biosynthesis	Metabolism	Metabolism of cofactors and vitamins	1	408	36	11182	0.0277778	0.738217	0.999902
ko00190	Oxidative phosphorylation	Metabolism	Energy metabolism	2	408	161	11182	0.0124224	0.982679	0.999902
ko00230	Purine metabolism	Metabolism	Nucleotide metabolism	5	408	161	11182	0.0310559	0.70453	0.999902
ko00240	Pyrimidine metabolism	Metabolism	Nucleotide metabolism	2	408	93	11182	0.0215054	0.85854	0.999902
ko00280	Valine, leucine and isoleucine degradation	Metabolism	Amino acid metabolism	4	408	103	11182	0.038835	0.521535	0.999902
ko00310	Lysine degradation	Metabolism	Amino acid metabolism	6	408	206	11182	0.0291262	0.767958	0.999902
ko00330	Arginine and proline metabolism	Metabolism	Amino acid metabolism	2	408	79	11182	0.0253165	0.789279	0.999902
ko00380	Tryptophan metabolism	Metabolism	Amino acid metabolism	3	408	57	11182	0.0526316	0.345309	0.999902
ko00450	Selenocompound metabolism	Metabolism	Metabolism of other amino acids	2	408	35	11182	0.0571429	0.366979	0.999902
ko00480	Glutathione metabolism	Metabolism	Metabolism of other amino acids	6	408	160	11182	0.0375	0.531493	0.999902
ko00514	Other types of O-glycan biosynthesis	Metabolism	Glycan biosynthesis and metabolism	1	408	47	11182	0.0212766	0.826337	0.999902
ko00534	Glycosaminoglycan biosynthesis - heparan sulfate / heparin	Metabolism	Glycan biosynthesis and metabolism	2	408	40	11182	0.05	0.431677	0.999902
ko00565	Ether lipid metabolism	Metabolism	Lipid metabolism	1	408	68	11182	0.0147059	0.92076	0.999902
ko00601	Glycosphingolipid biosynthesis - lacto and neolacto series	Metabolism	Glycan biosynthesis and metabolism	1	408	20	11182	0.05	0.524807	0.999902
ko00650	Butanoate metabolism	Metabolism	Carbohydrate metabolism	1	408	37	11182	0.027027	0.7478	0.999902
ko00760	Nicotinate and nicotinamide metabolism	Metabolism	Metabolism of cofactors and vitamins	1	408	33	11182	0.030303	0.707235	0.999902
ko00900	Terpenoid backbone biosynthesis	Metabolism	Metabolism of terpenoids and polyketides	2	408	67	11182	0.0298507	0.707744	0.999902
ko00910	Nitrogen metabolism	Metabolism	Energy metabolism	1	408	41	11182	0.0243902	0.782756	0.999902
ko01040	Biosynthesis of unsaturated fatty acids	Metabolism	Lipid metabolism	5	408	109	11182	0.0458716	0.366524	0.999902
ko01230	Biosynthesis of amino acids	Metabolism	Global and overview maps	6	408	149	11182	0.0402685	0.462047	0.999902
ko03010	Ribosome	Genetic Information Processing	Translation	2	408	293	11182	0.00682594	0.999801	0.999902
ko03013	RNA transport	Genetic Information Processing	Translation	6	408	449	11182	0.013363	0.999241	0.999902
ko03015	mRNA surveillance pathway	Genetic Information Processing	Translation	7	408	313	11182	0.0223642	0.942938	0.999902
ko03022	Basal transcription factors	Genetic Information Processing	Transcription	3	408	66	11182	0.0454545	0.434684	0.999902
ko03030	DNA replication	Genetic Information Processing	Replication and repair	4	408	95	11182	0.0421053	0.458353	0.999902
ko03040	Spliceosome	Genetic Information Processing	Transcription	10	408	407	11182	0.02457	0.932424	0.999902
ko03050	Proteasome	Genetic Information Processing	Folding, sorting and degradation	2	408	54	11182	0.037037	0.591485	0.999902
ko03060	Protein export	Genetic Information Processing	Folding, sorting and degradation	1	408	35	11182	0.0285714	0.728272	0.999902
ko03420	Nucleotide excision repair	Genetic Information Processing	Replication and repair	3	408	115	11182	0.026087	0.796109	0.999902
ko03430	Mismatch repair	Genetic Information Processing	Replication and repair	1	408	55	11182	0.0181818	0.871184	0.999902
ko03440	Homologous recombination	Genetic Information Processing	Replication and repair	2	408	71	11182	0.028169	0.737488	0.999902
ko03460	Fanconi anemia pathway	Genetic Information Processing	Replication and repair	3	408	100	11182	0.03	0.712359	0.999902
ko04010	MAPK signaling pathway	Environmental Information Processing	Signal transduction	5	408	291	11182	0.0171821	0.983084	0.999902
ko04012	ErbB signaling pathway	Environmental Information Processing	Signal transduction	2	408	74	11182	0.027027	0.758071	0.999902
ko04013	MAPK signaling pathway - fly	Environmental Information Processing	Signal transduction	3	408	371	11182	0.00808625	0.999902	0.999902
ko04014	Ras signaling pathway	Environmental Information Processing	Signal transduction	4	408	251	11182	0.0159363	0.983398	0.999902
ko04015	Rap1 signaling pathway	Environmental Information Processing	Signal transduction	7	408	227	11182	0.030837	0.727367	0.999902
ko04020	Calcium signaling pathway	Environmental Information Processing	Signal transduction	3	408	211	11182	0.014218	0.984677	0.999902
ko04022	cGMP-PKG signaling pathway	Environmental Information Processing	Signal transduction	8	408	224	11182	0.0357143	0.575515	0.999902
ko04024	cAMP signaling pathway	Environmental Information Processing	Signal transduction	6	408	271	11182	0.0221402	0.93445	0.999902
ko04062	Chemokine signaling pathway	Organismal Systems	Immune system	3	408	143	11182	0.020979	0.898377	0.999902
ko04066	HIF-1 signaling pathway	Environmental Information Processing	Signal transduction	5	408	162	11182	0.0308642	0.70965	0.999902
ko04068	FoxO signaling pathway	Environmental Information Processing	Signal transduction	7	408	227	11182	0.030837	0.727367	0.999902
ko04070	Phosphatidylinositol signaling system	Environmental Information Processing	Signal transduction	7	408	150	11182	0.0466667	0.307561	0.999902
ko04071	Sphingolipid signaling pathway	Environmental Information Processing	Signal transduction	7	408	181	11182	0.038674	0.492302	0.999902
ko04072	Phospholipase D signaling pathway	Environmental Information Processing	Signal transduction	7	408	161	11182	0.0434783	0.372946	0.999902
ko04080	Neuroactive ligand-receptor interaction	Environmental Information Processing	Signaling molecules and interaction	4	408	125	11182	0.032	0.67411	0.999902
ko04110	Cell cycle	Cellular Processes	Cell growth and death	5	408	208	11182	0.0240385	0.881251	0.999902
ko04114	Oocyte meiosis	Cellular Processes	Cell growth and death	3	408	141	11182	0.0212766	0.892983	0.999902
ko04115	p53 signaling pathway	Cellular Processes	Cell growth and death	1	408	66	11182	0.0151515	0.914606	0.999902
ko04120	Ubiquitin mediated proteolysis	Genetic Information Processing	Folding, sorting and degradation	2	408	257	11182	0.0077821	0.999304	0.999902
ko04141	Protein processing in endoplasmic reticulum	Genetic Information Processing	Folding, sorting and degradation	3	408	331	11182	0.00906344	0.999635	0.999902
ko04144	Endocytosis	Cellular Processes	Transport and catabolism	12	408	416	11182	0.0288462	0.83665	0.999902
ko04145	Phagosome	Cellular Processes	Transport and catabolism	10	408	238	11182	0.0420168	0.369724	0.999902
ko04146	Peroxisome	Cellular Processes	Transport and catabolism	8	408	200	11182	0.04	0.446678	0.999902
ko04150	mTOR signaling pathway	Environmental Information Processing	Signal transduction	6	408	231	11182	0.025974	0.852586	0.999902
ko04151	PI3K-Akt signaling pathway	Environmental Information Processing	Signal transduction	13	408	366	11182	0.0355191	0.580344	0.999902
ko04210	Apoptosis	Cellular Processes	Cell growth and death	7	408	211	11182	0.0331754	0.654734	0.999902
ko04212	Longevity regulating pathway - worm	Organismal Systems	Aging	6	408	159	11182	0.0377358	0.525322	0.999902
ko04213	Longevity regulating pathway - multiple species	Organismal Systems	Aging	4	408	126	11182	0.031746	0.680181	0.999902
ko04216	Ferroptosis	Cellular Processes	Cell growth and death	2	408	67	11182	0.0298507	0.707744	0.999902
ko04217	Necroptosis	Cellular Processes	Cell growth and death	6	408	140	11182	0.0428571	0.403434	0.999902
ko04218	Cellular senescence	Cellular Processes	Cell growth and death	2	408	194	11182	0.0103093	0.994126	0.999902
ko04260	Cardiac muscle contraction	Organismal Systems	Circulatory system	1	408	124	11182	0.00806452	0.990294	0.999902
ko04261	Adrenergic signaling in cardiomyocytes	Organismal Systems	Circulatory system	2	408	183	11182	0.010929	0.991549	0.999902
ko04270	Vascular smooth muscle contraction	Organismal Systems	Circulatory system	3	408	184	11182	0.0163043	0.966628	0.999902
ko04320	Dorso-ventral axis formation	Organismal Systems	Development	4	408	174	11182	0.0229885	0.883829	0.999902
ko04330	Notch signaling pathway	Environmental Information Processing	Signal transduction	4	408	138	11182	0.0289855	0.746848	0.999902
ko04340	Hedgehog signaling pathway	Environmental Information Processing	Signal transduction	11	408	310	11182	0.0354839	0.581615	0.999902
ko04341	Hedgehog signaling pathway - fly	Environmental Information Processing	Signal transduction	9	408	238	11182	0.0378151	0.504729	0.999902
ko04350	TGF-beta signaling pathway	Environmental Information Processing	Signal transduction	3	408	134	11182	0.0223881	0.872032	0.999902
ko04360	Axon guidance	Organismal Systems	Development	2	408	182	11182	0.010989	0.991266	0.999902
ko04371	Apelin signaling pathway	Environmental Information Processing	Signal transduction	1	408	209	11182	0.00478469	0.999607	0.999902
ko04390	Hippo signaling pathway	Environmental Information Processing	Signal transduction	4	408	212	11182	0.0188679	0.953756	0.999902
ko04391	Hippo signaling pathway - fly	Environmental Information Processing	Signal transduction	3	408	231	11182	0.012987	0.991546	0.999902
ko04392	Hippo signaling pathway - multiple species	Environmental Information Processing	Signal transduction	1	408	62	11182	0.016129	0.900832	0.999902
ko04510	Focal adhesion	Cellular Processes	Cellular community - eukaryotes	12	408	334	11182	0.0359281	0.564075	0.999902
ko04512	ECM-receptor interaction	Environmental Information Processing	Signaling molecules and interaction	5	408	148	11182	0.0337838	0.632357	0.999902
ko04514	Cell adhesion molecules (CAMs)	Environmental Information Processing	Signaling molecules and interaction	2	408	91	11182	0.021978	0.850108	0.999902
ko04520	Adherens junction	Cellular Processes	Cellular community - eukaryotes	10	408	259	11182	0.03861	0.473418	0.999902
ko04530	Tight junction	Cellular Processes	Cellular community - eukaryotes	7	408	329	11182	0.0212766	0.95923	0.999902
ko04540	Gap junction	Cellular Processes	Cellular community - eukaryotes	3	408	111	11182	0.027027	0.776014	0.999902
ko04550	Signaling pathways regulating pluripotency of stem cells	Cellular Processes	Cellular community - eukaryotes	3	408	134	11182	0.0223881	0.872032	0.999902
ko04611	Platelet activation	Organismal Systems	Immune system	9	408	205	11182	0.0439024	0.333191	0.999902
ko04614	Renin-angiotensin system	Organismal Systems	Endocrine system	3	408	79	11182	0.0379747	0.554505	0.999902
ko04620	Toll-like receptor signaling pathway	Organismal Systems	Immune system	3	408	77	11182	0.038961	0.537038	0.999902
ko04622	RIG-I-like receptor signaling pathway	Organismal Systems	Immune system	1	408	31	11182	0.0322581	0.684574	0.999902
ko04623	Cytosolic DNA-sensing pathway	Organismal Systems	Immune system	1	408	42	11182	0.0238095	0.790712	0.999902
ko04624	Toll and Imd signaling pathway	Organismal Systems	Immune system	4	408	196	11182	0.0204082	0.931125	0.999902
ko04630	Jak-STAT signaling pathway	Environmental Information Processing	Signal transduction	2	408	82	11182	0.0243902	0.806257	0.999902
ko04660	T cell receptor signaling pathway	Organismal Systems	Immune system	1	408	57	11182	0.0175439	0.880458	0.999902
ko04662	B cell receptor signaling pathway	Organismal Systems	Immune system	1	408	45	11182	0.0222222	0.812877	0.999902
ko04666	Fc gamma R-mediated phagocytosis	Organismal Systems	Immune system	2	408	122	11182	0.0163934	0.940646	0.999902
ko04668	TNF signaling pathway	Environmental Information Processing	Signal transduction	1	408	74	11182	0.0135135	0.936691	0.999902
ko04670	Leukocyte transendothelial migration	Organismal Systems	Immune system	2	408	109	11182	0.0183486	0.911854	0.999902
ko04710	Circadian rhythm	Organismal Systems	Environmental adaptation	2	408	63	11182	0.031746	0.675242	0.999902
ko04713	Circadian entrainment	Organismal Systems	Environmental adaptation	2	408	100	11182	0.02	0.884747	0.999902
ko04714	Thermogenesis	Organismal Systems	Environmental adaptation	10	408	362	11182	0.0276243	0.856554	0.999902
ko04720	Long-term potentiation	Organismal Systems	Nervous system	3	408	129	11182	0.0232558	0.854926	0.999902
ko04722	Neurotrophin signaling pathway	Organismal Systems	Nervous system	1	408	128	11182	0.0078125	0.991649	0.999902
ko04723	Retrograde endocannabinoid signaling	Organismal Systems	Nervous system	2	408	161	11182	0.0124224	0.982679	0.999902
ko04724	Glutamatergic synapse	Organismal Systems	Nervous system	1	408	127	11182	0.00787402	0.99133	0.999902
ko04725	Cholinergic synapse	Organismal Systems	Nervous system	9	408	238	11182	0.0378151	0.504729	0.999902
ko04726	Serotonergic synapse	Organismal Systems	Nervous system	1	408	88	11182	0.0113636	0.96252	0.999902
ko04728	Dopaminergic synapse	Organismal Systems	Nervous system	4	408	165	11182	0.0242424	0.85748	0.999902
ko04730	Long-term depression	Organismal Systems	Nervous system	1	408	47	11182	0.0212766	0.826337	0.999902
ko04745	Phototransduction - fly	Organismal Systems	Sensory system	2	408	126	11182	0.015873	0.947537	0.999902
ko04750	Inflammatory mediator regulation of TRP channels	Organismal Systems	Sensory system	1	408	102	11182	0.00980392	0.977826	0.999902
ko04810	Regulation of actin cytoskeleton	Cellular Processes	Cell motility	10	408	263	11182	0.0380228	0.492947	0.999902
ko04911	Insulin secretion	Organismal Systems	Endocrine system	3	408	99	11182	0.030303	0.705935	0.999902
ko04912	GnRH signaling pathway	Organismal Systems	Endocrine system	1	408	110	11182	0.00909091	0.983577	0.999902
ko04913	Ovarian steroidogenesis	Organismal Systems	Endocrine system	3	408	59	11182	0.0508475	0.365416	0.999902
ko04914	Progesterone-mediated oocyte maturation	Organismal Systems	Endocrine system	2	408	97	11182	0.0206186	0.874117	0.999902
ko04915	Estrogen signaling pathway	Organismal Systems	Endocrine system	1	408	174	11182	0.00574713	0.998525	0.999902
ko04918	Thyroid hormone synthesis	Organismal Systems	Endocrine system	5	408	147	11182	0.0340136	0.626385	0.999902
ko04919	Thyroid hormone signaling pathway	Organismal Systems	Endocrine system	10	408	317	11182	0.0315457	0.725874	0.999902
ko04920	Adipocytokine signaling pathway	Organismal Systems	Endocrine system	3	408	93	11182	0.0322581	0.66509	0.999902
ko04921	Oxytocin signaling pathway	Organismal Systems	Endocrine system	4	408	190	11182	0.0210526	0.920329	0.999902
ko04922	Glucagon signaling pathway	Organismal Systems	Endocrine system	6	408	189	11182	0.031746	0.692577	0.999902
ko04924	Renin secretion	Organismal Systems	Endocrine system	4	408	106	11182	0.0377358	0.544323	0.999902
ko04925	Aldosterone synthesis and secretion	Organismal Systems	Endocrine system	4	408	147	11182	0.0272109	0.789502	0.999902
ko04926	Relaxin signaling pathway	Organismal Systems	Endocrine system	4	408	219	11182	0.0182648	0.96132	0.999902
ko04927	Cortisol synthesis and secretion	Organismal Systems	Endocrine system	3	408	83	11182	0.0361446	0.588232	0.999902
ko04928	Parathyroid hormone synthesis, secretion and action	Organismal Systems	Endocrine system	2	408	120	11182	0.0166667	0.936887	0.999902
ko04960	Aldosterone-regulated sodium reabsorption	Organismal Systems	Excretory system	1	408	34	11182	0.0294118	0.717949	0.999902
ko04961	Endocrine and other factor-regulated calcium reabsorption	Organismal Systems	Excretory system	1	408	54	11182	0.0185185	0.866281	0.999902
ko04962	Vasopressin-regulated water reabsorption	Organismal Systems	Excretory system	1	408	55	11182	0.0181818	0.871184	0.999902
ko04970	Salivary secretion	Organismal Systems	Digestive system	1	408	103	11182	0.00970874	0.978643	0.999902
ko04971	Gastric acid secretion	Organismal Systems	Digestive system	1	408	82	11182	0.0121951	0.953075	0.999902
ko04974	Protein digestion and absorption	Organismal Systems	Digestive system	9	408	225	11182	0.04	0.437465	0.999902
ko04976	Bile secretion	Organismal Systems	Digestive system	2	408	101	11182	0.019802	0.888102	0.999902
ko04977	Vitamin digestion and absorption	Organismal Systems	Digestive system	7	408	170	11182	0.0411765	0.427036	0.999902
