# Supplementary material for: De Novo Transcription Responses Describe Host-Related Differentiation of Paracoccus marginatus (Hemiptera: Pseudococcidae)
Source: Insects. 2022 Sep 19;13(9):850. doi: 10.3390/insects13090850 (PMC9502998; doi:10.3390/insects13090850)
Supplement: Supplementary file 1 [file insects-13-00850-s001.zip › Table S8. DEGs related to enzymes in Pa. marginatus transcriptome.xlsx]

## Sheet: Sheet1
Category		Gene ID	Annotation	MF6/TF6
Digestive enzyme genes	Trypsin	CL2293.Contig2_All	Trypsin	↓
		CL286.Contig13_All	Trypsin	↓
		CL286.Contig8_All	Trypsin	↓
		Unigene10749_All	Trypsin	↓
		Unigene8232_All	Trypsin	↓
	Cysteine protease	CL1063.Contig2_All	Papain family cysteine protease	↓
		CL2404.Contig1_All	papain family cysteine protease	↓
		CL3096.Contig1_All	papain family cysteine protease	↓
		CL3981.Contig2_All	papain family cysteine protease	↓
	amylase	Unigene10628_All	Alpha amylase	↓
		Unigene4218_All	Alpha amylase, catalytic domain	↓
	Carboxypeptidase	CL2139.Contig2_All	Serine carboxypeptidases	↓
	Serine protease	CL295.Contig2_All	serine protease inhibitor-1	↓
		CL294.Contig6_All	serine protease inhibitor protein	↓
		CL762.Contig6_All	serine protease inhibitor protein	↓
		CL943.Contig1_All	serine protease inhibitor protein	↓
		CL943.Contig3_All	serine protease inhibitor protein	↓
		CL943.Contig4_All	serine protease inhibitor protein	↓
		Unigene10684_All	erine protease inhibitor domain	↓
		Unigene9760_All	Serpin (serine protease inhibitor)	↓
		Unigene11195_All	serine proteinase stubble	↓
		CL943.Contig5_All	serine protease inhibitor protein	↑
		Unigene4992_All	serine protease inhibitor protein	↑
	lipase	CL2194.Contig1_All	lipase 3	↓
		CL2667.Contig4_All	lipase 3	↓
		Unigene8939_All	lipase	↓
		CL279.Contig4_All	pancreatic triacylglycerol lipase	↑
		Unigene12761_All	pancreatic lipase	↑
		Unigene14390_All	pancreatic triacylglycerol lipase	↑
	Aminopeptidase	CL637.Contig13_All	aminopeptidase and related aminopeptidases	↓
		Unigene2039_All	aminopeptidase and related aminopeptidases	↓
		CL637.Contig3_All	aminopeptidase and related aminopeptidases	↑
Detoxifying enzyme genes	cytochrome p450	Unigene1314_All	Cytochrome P450	↓
		Unigene242_All	Cytochrome P450	↓
		CL256.Contig2_All	Cytochrome P450	↓
		Unigene11746_All	Cytochrome P450	↑
	esterase	CL1978.Contig4_All	carboxylesterase	↓
		CL1978.Contig5_All	carboxylesterase	↓
		CL2194.Contig1_All	Triglyceride lipase-cholesterol esterase	↓
		CL2413.Contig2_All	neuropathy target esterase sws isoform X6	↓
		CL2577.Contig3_All	carboxylesterase-6-like	↓
		CL2667.Contig4_All	Triglyceride lipase-cholesterol esterase	↓
		CL324.Contig9_All	esterase FE4-like isoform X1	↓
		Unigene1964_All	5'-cyclic phosphodiesterase-like isoform X2	↓
		Unigene4746_All	esterase FE4	↓
		CL1270.Contig3_All	esterase FE4	↓
		Unigene6507_All	esterase E4	↓
		Unigene7234_All	Esterase FE4	↑
		CL466.Contig9_All	esterase E4	↑
		Unigene4995_All	carboxylesterase	↑
	peroxidase(POD)	CL161.Contig5_All	glutathione peroxidase	↓
		CL285.Contig1_All	peroxiredoxin-6	↓
		CL161.Contig4_All	glutathione peroxidase	↑
	UDP-glycosyltransferases (UGTs)	CL1835.Contig1_All	alpha-trehalose-phosphate synthase	↓
Reproduction related genes	niemann-pick c2 protein	Unigene10809_All	protein NPC2 homolog	↓
	Juvenile hormone	CL1953.Contig2_All	Haemolymph juvenile hormone binding protein	↓
	Vitellogenin	Unigene11804_All	Vitellogenin-1	↓
		Unigene8439_All	Vitellogenin-A1	↓
		Unigene8939_All	Vitellogenin	↓
	Vitellogenin receptor	CL1349.Contig8_All	Vitellogenin receptor	↓
ribosomal protein genes	ribosomal protein	CL1967.Contig1_All	ribosomal protein L13	↓
		CL55.Contig2_All	ribosomal protein SA	↓
		CL2009.Contig2_All	Ribosome-binding protein 1	↓
		CL2009.Contig4_All	Ribosome-binding protein 1	↑
		CL2009.Contig6_All	Ribosome-binding protein 1	↑
